# Supplementary material for: Induction of osteogenesis by bone-targeted Notch activation
Source: PubMed Central journal article supplement (PMC8880996; doi:10.7554/elife.60183), 2022-02-04
Supplement: elife-60183-fig1-figsupp1-data2.pdf [file elife-60183-fig1-figsupp1-data2.pdf]

**A**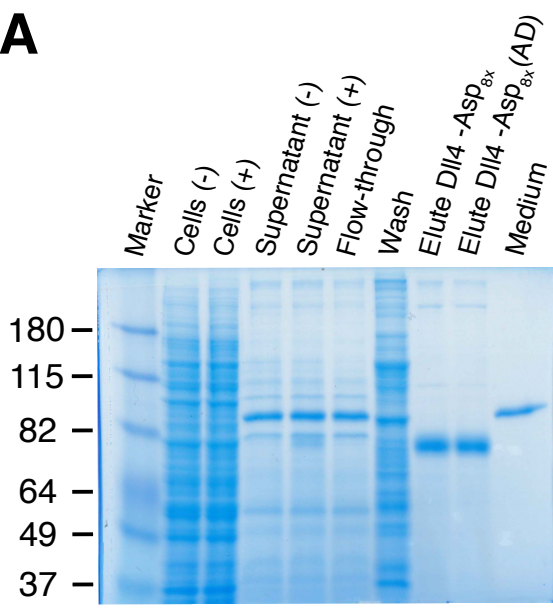

Xu, Dinh et al., Figure 1-figure supplement 1A

**B**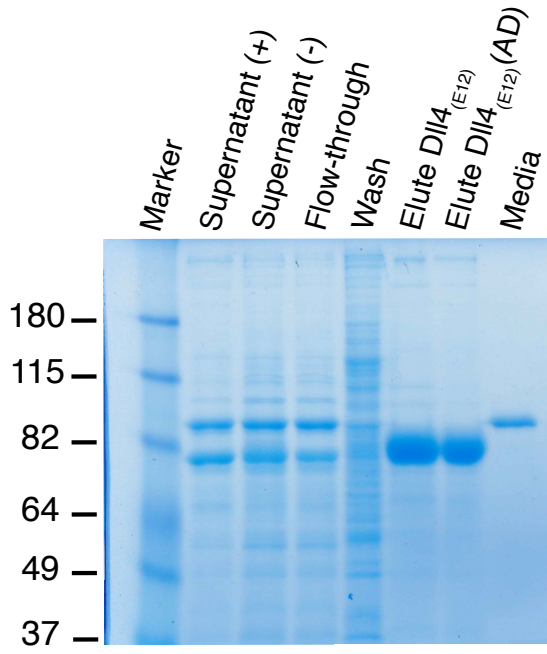

Xu, Dinh et al., Figure 1-figure supplement 4B

**E**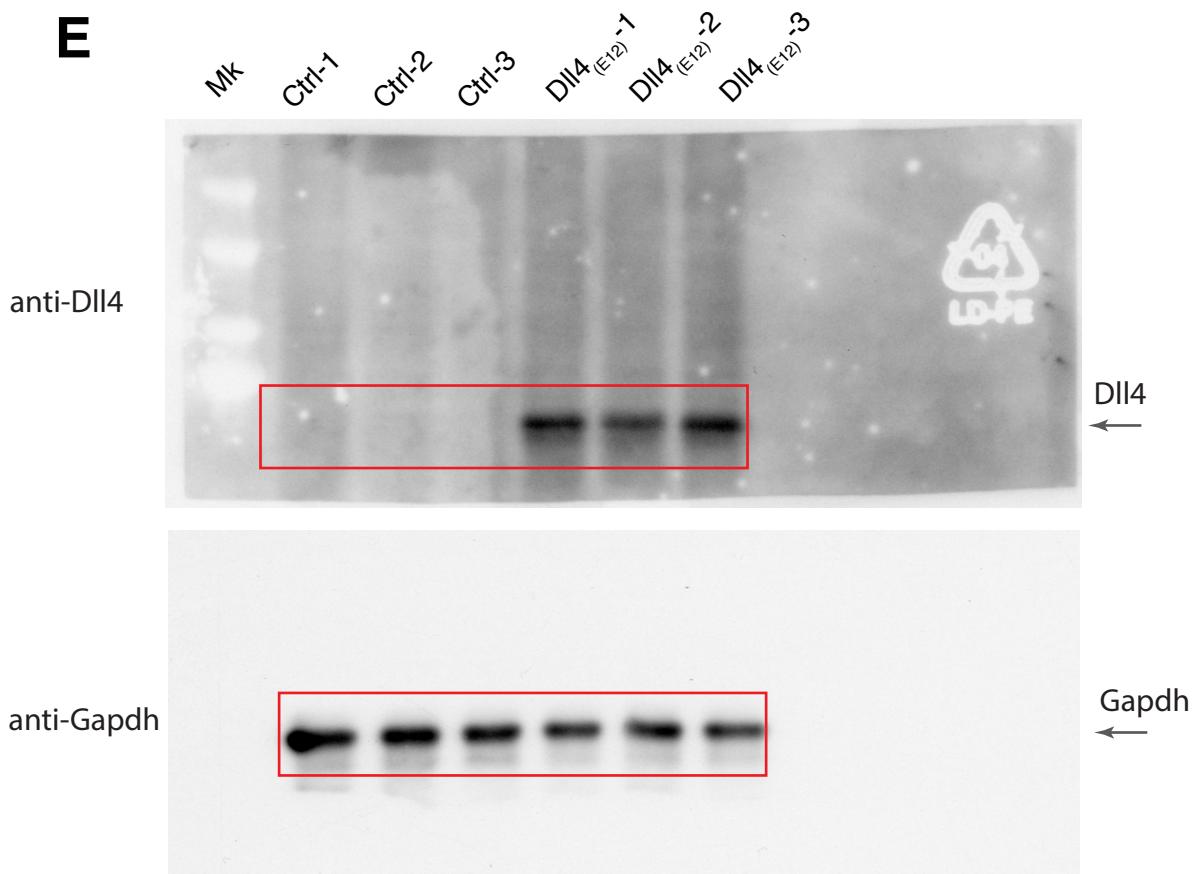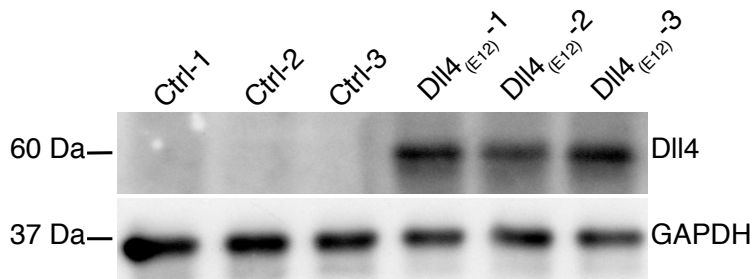

Xu, Dinh et al., Figure 1-figure supplement 4E

**A**

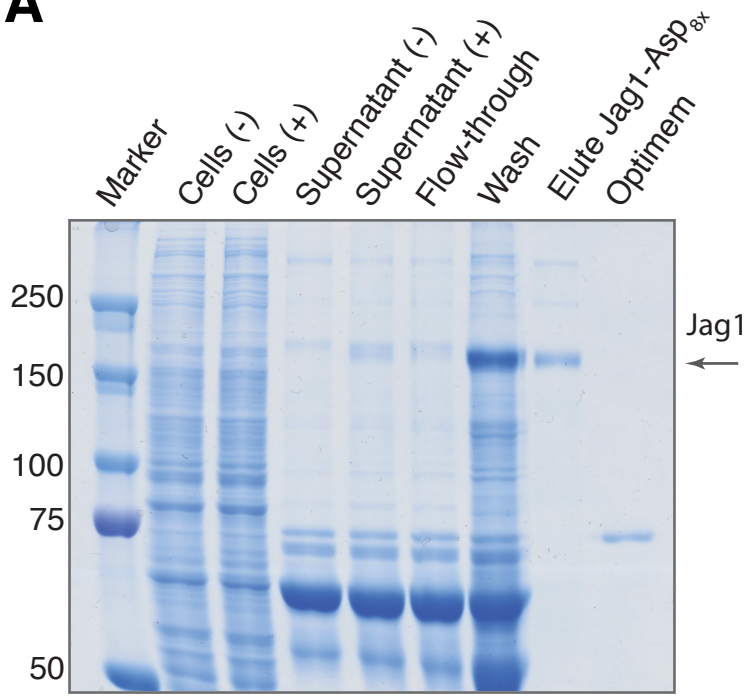

Xu, Dinh et al., Figure 5-figure supplement 1A



**B**

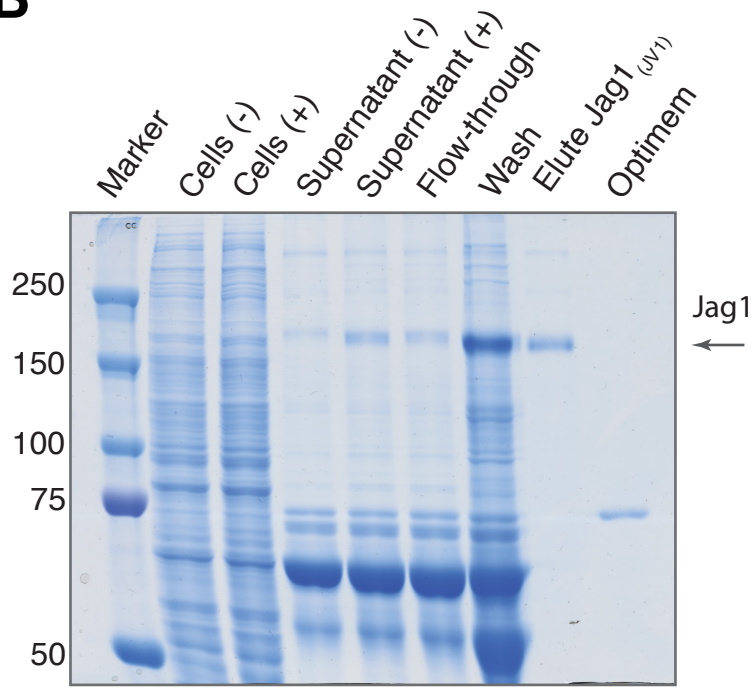

Xu, Dinh et al., Figure 5-figure supplement 1B

C

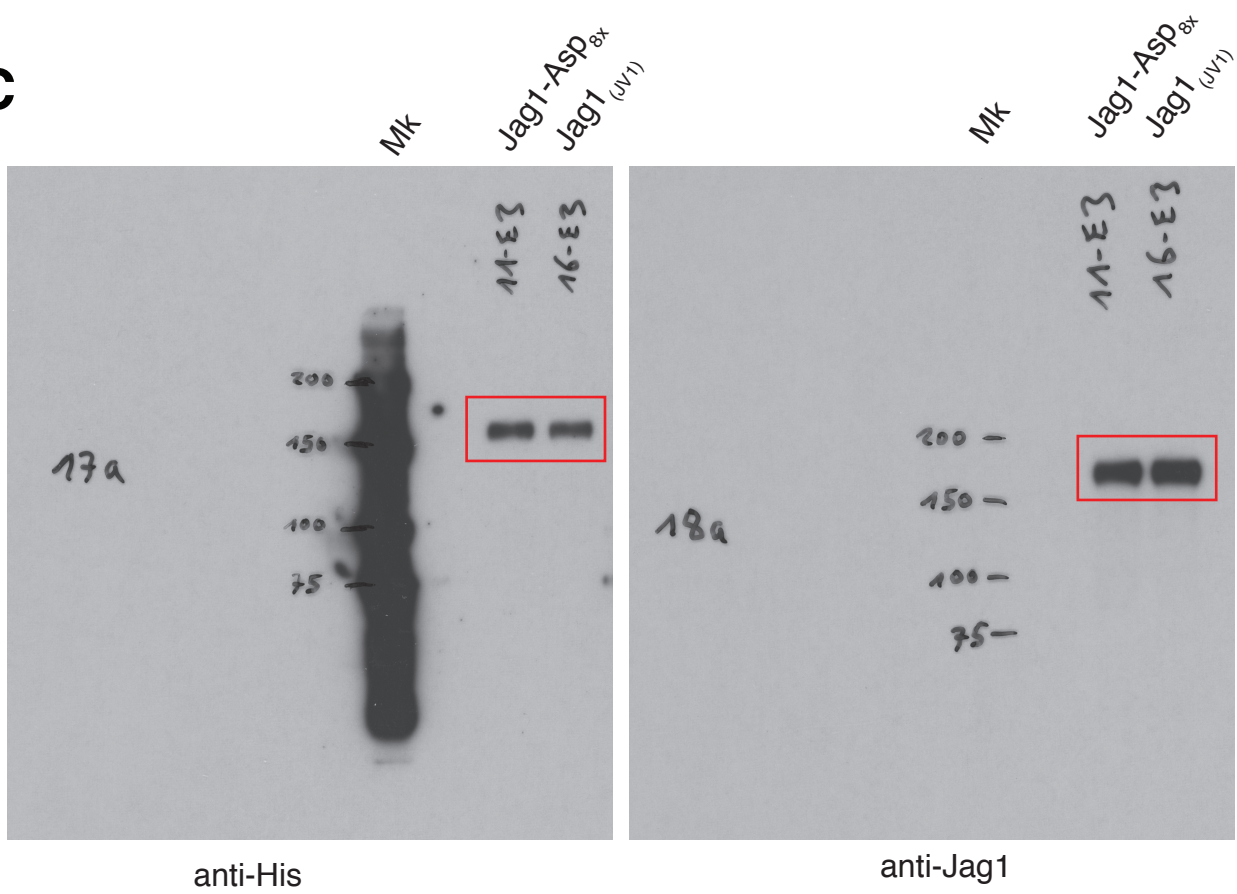

anti-His

anti-Jag1

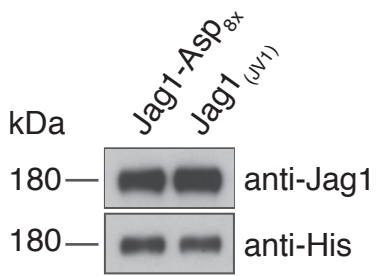

Xu, Dinh et al., Figure 5-figure supplement 1C
