# Supplementary material for: Induction of osteogenesis by bone-targeted Notch activation
Source: eLife. 2022 Feb 4;11:e60183. doi: 10.7554/eLife.60183 (PMC8880996; doi:10.7554/eLife.60183)
Supplement: Figure 1—figure supplement 1—source data 1. [file elife-60183-fig1-figsupp1-data1.xlsx]

## Sheet: Sheet1
Figure 1-figure supplement 1-source data 1
B	Soluble Dll4-ECD on confluent HUVEC
		BSA				Dll4-Asp(8x)
	Hs DLL4	1	1	1	1	0.648232	0.425663	0.468703	0.686711
	Hs HEY1	1	1	1	1	0.635106	0.643894	0.680801	0.686431
	Hs HEY2	1	1	1	1	0.514492	0.750813	0.893604	1.30426
	Hs HES1	1	1	1	1	0.602499	0.835128	0.632039	0.745527
	Hs EFNB2	1	1	1	1	0.834899	0.698702	0.557887	0.812891
	Hs NRARP	1	1	1	1	0.755661	0.875879	0.735708	1.00647
	Table Analyzed	Soluble Dll4-ECD on confluent HUVEC
	Column A	BSA
	vs.	vs.
	Column B	Dll4-Asp(8x)
	Test details
	Test name	Unpaired t test with Welch correction
	Variance assumption	Individual variance for each group
	Multiple comparisons	Set P value threshold
	Method	No correction for multiple comparisons
	Alpha	0.05
	Number of tests performed	6
	Number of rows omitted	0
		Below threshold?	P value	Mean of BSA	Mean of Dll4-Asp(8x)	Difference	SE of difference	t ratio	df
	Hs DLL4	Yes	0.006383	1	0.5573	0.4427	0.06467	6.845	3
	Hs HEY1	Yes	0.000122	1	0.6616	0.3384	0.01291	26.21	3
	Hs HEY2	No	0.477363	1	0.8658	0.1342	0.1657	0.8097	3
	Hs HES1	Yes	0.011639	1	0.7038	0.2962	0.05354	5.532	3
	Hs EFNB2	Yes	0.022967	1	0.7261	0.2739	0.06352	4.312	3
	Hs NRARP	No	0.087454	1	0.8434	0.1566	0.06255	2.503	3
C	Immobilized Dll4-ECD on HUVEC
		BSA						Dll4-Asp(8x)
	Hs DLL4	1	1	1	1	1	1	2.97667	1.69278	2.51987	2.17887	3.85812	5.40463
	Hs HEY1	1	1	1	1	1	1	1.34173	1.44255	1.80275	1.38059	2.26556	2.97324
	Hs HEY2	1	1	1	1	1	1	2.8568	1.46716	1.98774	3.34205	3.64241	3.71302
	Hs HES1	1	1	1	1	1	1	1.34357	1.31453	1.65666	2.10036	1.7998	2.53047
	Hs EFNB2	1	1	1	1	1	1	1.30818	1.72267	1.56374	1.52513	2.03808	3.00051
	Hs NRARP	1	1	1	1	1	1	0.922247	1.4015	1.72842	1.06836	1.36959	1.71961
	Table Analyzed	Immobilized Dll4-ECD on HUVEC
	Column A	BSA
	vs.	vs.
	Column B	Dll4-Asp(8x)
	Test details
	Test name	Unpaired t test with Welch correction
	Variance assumption	Individual variance for each group
	Multiple comparisons	Set P value threshold
	Method	No correction for multiple comparisons
	Alpha	0.05
	Number of tests performed	6
	Number of rows omitted	0
		Below threshold?	P value	Mean of BSA	Mean of Dll4-Asp(8x)	Difference	SE of difference	t ratio	df
	Hs DLL4	Yes	0.012256	1	3.105	-2.105	0.5497	3.829	5
	Hs HEY1	Yes	0.021572	1	1.868	-0.8677	0.2633	3.296	5
	Hs HEY2	Yes	0.004617	1	2.835	-1.835	0.3772	4.864	5
	Hs HES1	Yes	0.008881	1	1.791	-0.7909	0.1904	4.153	5
	Hs EFNB2	Yes	0.018107	1	1.86	-0.8597	0.2487	3.457	5
	Hs NRARP	Yes	0.040932	1	1.368	-0.3683	0.1346	2.737	5
