# Supplementary material for: Induction of osteogenesis by bone-targeted Notch activation
Source: eLife. 2022 Feb 4;11:e60183. doi: 10.7554/eLife.60183 (PMC8880996; doi:10.7554/eLife.60183)
Supplement: Figure 1—figure supplement 4—source data 1. [file elife-60183-fig1-figsupp4-data1.xlsx]

## Sheet: Sheet1
Figure 1-figure supplement 4-source data 1
C	Soluble Dll4-Variant on HUVEC_Hs DLL4											Soluble Dll4-Variant on HUVEC_Hs HEY1										Soluble Dll4-Variant on HUVEC_Hs HEY2										Soluble Dll4-Variant on HUVEC_Hs HES1										Soluble Dll4-Variant on HUVEC_Hs EFNB2
		BSA	Dll4-Asp8x	Dll4(E12)									BSA	Dll4-Asp8x	Dll4(E12)								BSA	Dll4-Asp8x	Dll4(E12)								BSA	Dll4-Asp8x	Dll4(E12)								BSA	Dll4-Asp8x	Dll4(E12)
		1	0.59038	0.336179									1	0.722731	0.60003								1	0.370138	0.277937								1	0.773709	0.374504								1	0.49096	0.337366
		1	0.585015	0.347112									1	0.83211	0.723963								1	0.456678	0.337699								1	0.728662	0.411951								1	0.767409	0.441285
		1	0.643645	0.397559									1	0.725496	0.606928								1	0.419034	0.374146								1	0.747925	0.494826								1	0.760955	0.420117
	Table Analyzed	Soluble Dll4-Variant on HUVEC_Hs DLL4										Table Analyzed	Soluble Dll4-Variant on HUVEC_Hs HEY1									Table Analyzed	Soluble Dll4-Variant on HUVEC_Hs HEY2									Table Analyzed	Soluble Dll4-Variant on HUVEC_Hs HES1									Table Analyzed	Soluble Dll4-Variant on HUVEC_Hs EFNB2
	Data sets analyzed	A-C										Data sets analyzed	A-C									Data sets analyzed	A-C									Data sets analyzed	A-C									Data sets analyzed	A-C
	ANOVA summary											ANOVA summary										ANOVA summary										ANOVA summary										ANOVA summary
	F	441.5										F	34									F	282.2									F	172.6									F	29.14
	P value	<0.0001										P value	0.0005									P value	<0.0001									P value	<0.0001									P value	0.0008
	P value summary	****										P value summary	***									P value summary	****									P value summary	****									P value summary	***
	Significant diff. among means (P < 0.05)?	Yes										Significant diff. among means (P < 0.05)?	Yes									Significant diff. among means (P < 0.05)?	Yes									Significant diff. among means (P < 0.05)?	Yes									Significant diff. among means (P < 0.05)?	Yes
	R squared	0.9933										R squared	0.9189									R squared	0.9895									R squared	0.9829									R squared	0.9067
	Brown-Forsythe test											Brown-Forsythe test										Brown-Forsythe test										Brown-Forsythe test										Brown-Forsythe test
	F (DFn, DFd)	0.7684 (2, 6)										F (DFn, DFd)	0.5732 (2, 6)									F (DFn, DFd)	1.796 (2, 6)									F (DFn, DFd)	1.943 (2, 6)									F (DFn, DFd)	0.7622 (2, 6)
	P value	0.5045										P value	0.5918									P value	0.2448									P value	0.2236									P value	0.507
	P value summary	ns										P value summary	ns									P value summary	ns									P value summary	ns									P value summary	ns
	Are SDs significantly different (P < 0.05)?	No										Are SDs significantly different (P < 0.05)?	No									Are SDs significantly different (P < 0.05)?	No									Are SDs significantly different (P < 0.05)?	No									Are SDs significantly different (P < 0.05)?	No
	Bartlett's test											Bartlett's test										Bartlett's test										Bartlett's test										Bartlett's test
	Bartlett's statistic (corrected)											Bartlett's statistic (corrected)										Bartlett's statistic (corrected)										Bartlett's statistic (corrected)										Bartlett's statistic (corrected)
	P value											P value										P value										P value										P value
	P value summary											P value summary										P value summary										P value summary										P value summary
	Are SDs significantly different (P < 0.05)?											Are SDs significantly different (P < 0.05)?										Are SDs significantly different (P < 0.05)?										Are SDs significantly different (P < 0.05)?										Are SDs significantly different (P < 0.05)?
	ANOVA table	SS	DF	MS	F (DFn, DFd)	P value						ANOVA table	SS	DF	MS	F (DFn, DFd)	P value					ANOVA table	SS	DF	MS	F (DFn, DFd)	P value					ANOVA table	SS	DF	MS	F (DFn, DFd)	P value					ANOVA table	SS	DF	MS	F (DFn, DFd)	P value
	Treatment (between columns)	0.6247	2	0.3124	F (2, 6) = 441.5	P<0.0001						Treatment (between columns)	0.1981	2	0.09905	F (2, 6) = 34.00	P=0.0005					Treatment (between columns)	0.7982	2	0.3991	F (2, 6) = 282.2	P<0.0001					Treatment (between columns)	0.495	2	0.2475	F (2, 6) = 172.6	P<0.0001					Treatment (between columns)	0.5422	2	0.2711	F (2, 6) = 29.14	P=0.0008
	Residual (within columns)	0.004245	6	0.0007075								Residual (within columns)	0.01748	6	0.002913							Residual (within columns)	0.008484	6	0.001414							Residual (within columns)	0.008604	6	0.001434							Residual (within columns)	0.05582	6	0.009303
	Total	0.629	8									Total	0.2156	8								Total	0.8067	8								Total	0.5036	8								Total	0.598	8
	Data summary											Data summary										Data summary										Data summary										Data summary
	Number of treatments (columns)	3										Number of treatments (columns)	3									Number of treatments (columns)	3									Number of treatments (columns)	3									Number of treatments (columns)	3
	Number of values (total)	9										Number of values (total)	9									Number of values (total)	9									Number of values (total)	9									Number of values (total)	9
	Number of families	1										Number of families	1									Number of families	1									Number of families	1									Number of families	1
	Number of comparisons per family	3										Number of comparisons per family	3									Number of comparisons per family	3									Number of comparisons per family	3									Number of comparisons per family	3
	Alpha	0.05										Alpha	0.05									Alpha	0.05									Alpha	0.05									Alpha	0.05
	Tukey's multiple comparisons test	Mean Diff.	95.00% CI of diff.	Below threshold?	Summary	Adjusted P Value						Tukey's multiple comparisons test	Mean Diff.	95.00% CI of diff.	Below threshold?	Summary	Adjusted P Value					Tukey's multiple comparisons test	Mean Diff.	95.00% CI of diff.	Below threshold?	Summary	Adjusted P Value					Tukey's multiple comparisons test	Mean Diff.	95.00% CI of diff.	Below threshold?	Summary	Adjusted P Value					Tukey's multiple comparisons test	Mean Diff.	95.00% CI of diff.	Below threshold?	Summary	Adjusted P Value
	BSA vs. Dll4-Asp8x	0.3937	0.3270 to 0.4603	Yes	****	<0.0001	A-B					BSA vs. Dll4-Asp8x	0.2399	0.1047 to 0.3751	Yes	**	0.0039	A-B				BSA vs. Dll4-Asp8x	0.5847	0.4905 to 0.6789	Yes	****	<0.0001	A-B				BSA vs. Dll4-Asp8x	0.2499	0.1550 to 0.3448	Yes	***	0.0005	A-B				BSA vs. Dll4-Asp8x	0.3269	0.08525 to 0.5685	Yes	*	0.0142	A-B
	BSA vs. Dll4(E12)	0.6397	0.5731 to 0.7064	Yes	****	<0.0001	A-C					BSA vs. Dll4(E12)	0.3564	0.2211 to 0.4916	Yes	***	0.0005	A-C				BSA vs. Dll4(E12)	0.6701	0.5759 to 0.7643	Yes	****	<0.0001	A-C				BSA vs. Dll4(E12)	0.5729	0.4780 to 0.6678	Yes	****	<0.0001	A-C				BSA vs. Dll4(E12)	0.6004	0.3588 to 0.8420	Yes	***	0.0006	A-C
	Dll4-Asp8x vs. Dll4(E12)	0.2461	0.1794 to 0.3127	Yes	****	<0.0001	B-C					Dll4-Asp8x vs. Dll4(E12)	0.1165	-0.01875 to 0.2517	No	ns	0.0851	B-C				Dll4-Asp8x vs. Dll4(E12)	0.08536	-0.008851 to 0.1796	No	ns	0.0716	B-C				Dll4-Asp8x vs. Dll4(E12)	0.323	0.2281 to 0.4179	Yes	***	0.0001	B-C				Dll4-Asp8x vs. Dll4(E12)	0.2735	0.03188 to 0.5152	Yes	*	0.0307	B-C
	Test details	Mean 1	Mean 2	Mean Diff.	SE of diff.	n1	n2	q	DF			Test details	Mean 1	Mean 2	Mean Diff.	SE of diff.	n1	n2	q	DF		Test details	Mean 1	Mean 2	Mean Diff.	SE of diff.	n1	n2	q	DF		Test details	Mean 1	Mean 2	Mean Diff.	SE of diff.	n1	n2	q	DF		Test details	Mean 1	Mean 2	Mean Diff.	SE of diff.	n1	n2	q
	BSA vs. Dll4-Asp8x	1	0.6063	0.3937	0.02172	3	3	25.63	6			BSA vs. Dll4-Asp8x	1	0.7601	0.2399	0.04407	3	3	7.698	6		BSA vs. Dll4-Asp8x	1	0.4153	0.5847	0.0307	3	3	26.93	6		BSA vs. Dll4-Asp8x	1	0.7501	0.2499	0.03092	3	3	11.43	6		BSA vs. Dll4-Asp8x	1	0.6731	0.3269	0.07875	3	3	5.87
	BSA vs. Dll4(E12)	1	0.3603	0.6397	0.02172	3	3	41.66	6			BSA vs. Dll4(E12)	1	0.6436	0.3564	0.04407	3	3	11.44	6		BSA vs. Dll4(E12)	1	0.3299	0.6701	0.0307	3	3	30.86	6		BSA vs. Dll4(E12)	1	0.4271	0.5729	0.03092	3	3	26.2	6		BSA vs. Dll4(E12)	1	0.3996	0.6004	0.07875	3	3	10.78
	Dll4-Asp8x vs. Dll4(E12)	0.6063	0.3603	0.2461	0.02172	3	3	16.02	6			Dll4-Asp8x vs. Dll4(E12)	0.7601	0.6436	0.1165	0.04407	3	3	3.737	6		Dll4-Asp8x vs. Dll4(E12)	0.4153	0.3299	0.08536	0.0307	3	3	3.932	6		Dll4-Asp8x vs. Dll4(E12)	0.7501	0.4271	0.323	0.03092	3	3	14.77	6		Dll4-Asp8x vs. Dll4(E12)	0.6731	0.3996	0.2735	0.07875	3	3	4.912
D	Immobilized Dll4-Variant on HUVEC_Hs DLL4											Immobilized Dll4-Variant on HUVEC_Hs HEY1										Immobilized Dll4-Variant on HUVEC_Hs HEY2										Immobilized Dll4-Variant on HUVEC_Hs HES1										Immobilized Dll4-Variant on HUVEC_Hs EFNB2
		BSA	Dll4-Asp8x	Dll4(E12)									BSA	Dll4-Asp8x	Dll4(E12)								BSA	Dll4-Asp8x	Dll4(E12)								BSA	Dll4-Asp8x	Dll4(E12)								BSA	Dll4-Asp8x	Dll4(E12)
		1	4.60912	4.32063									1	4.76478	4.37428								1	17.916	17.2347								1	1.94435	2.02796								1	7.56981	7.31492
		1	4.0466	4.87178									1	4.69325	7.69764								1	16.7523	21.1616								1	2.01111	2.52565								1	7.95164	10.9724
		1	3.94851	4.78971									1	5.89771	6.85477								1	14.2228	19.9188								1	2.21961	2.4814								1	9.57489	9.49547
		1	4.95677	5.24965									1	4.82187	5.05853								1	17.5238	23.8786								1	2.18361	2.62268								1	7.49658	9.95863
	Table Analyzed	Immobilized Dll4-Variant on HUVEC_Hs DLL4										Table Analyzed	Immobilized Dll4-Variant on HUVEC_Hs HEY1									Table Analyzed	Immobilized Dll4-Variant on HUVEC_Hs HEY2									Table Analyzed	Immobilized Dll4-Variant on HUVEC_Hs HES1									Table Analyzed	Immobilized Dll4-Variant on HUVEC_Hs EFNB2
	Data sets analyzed	A-C										Data sets analyzed	A-C									Data sets analyzed	A-C									Data sets analyzed	A-C									Data sets analyzed	A-C
	ANOVA summary											ANOVA summary										ANOVA summary										ANOVA summary										ANOVA summary
	F	140.3										F	31.2									F	123.7									F	75.26									F	74.57
	P value	<0.0001										P value	<0.0001									P value	<0.0001									P value	<0.0001									P value	<0.0001
	P value summary	****										P value summary	****									P value summary	****									P value summary	****									P value summary	****
	Significant diff. among means (P < 0.05)?	Yes										Significant diff. among means (P < 0.05)?	Yes									Significant diff. among means (P < 0.05)?	Yes									Significant diff. among means (P < 0.05)?	Yes									Significant diff. among means (P < 0.05)?	Yes
	R squared	0.9689										R squared	0.8739									R squared	0.9649									R squared	0.9436									R squared	0.9431
	Brown-Forsythe test											Brown-Forsythe test										Brown-Forsythe test										Brown-Forsythe test										Brown-Forsythe test
	F (DFn, DFd)	5.396 (2, 9)										F (DFn, DFd)	11.20 (2, 9)									F (DFn, DFd)	3.005 (2, 9)									F (DFn, DFd)	1.700 (2, 9)									F (DFn, DFd)	1.877 (2, 9)
	P value	0.0288										P value	0.0036									P value	0.1001									P value	0.2365									P value	0.2083
	P value summary	*										P value summary	**									P value summary	ns									P value summary	ns									P value summary	ns
	Are SDs significantly different (P < 0.05)?	Yes										Are SDs significantly different (P < 0.05)?	Yes									Are SDs significantly different (P < 0.05)?	No									Are SDs significantly different (P < 0.05)?	No									Are SDs significantly different (P < 0.05)?	No
	Bartlett's test											Bartlett's test										Bartlett's test										Bartlett's test										Bartlett's test
	Bartlett's statistic (corrected)											Bartlett's statistic (corrected)										Bartlett's statistic (corrected)										Bartlett's statistic (corrected)										Bartlett's statistic (corrected)
	P value											P value										P value										P value										P value
	P value summary											P value summary										P value summary										P value summary										P value summary
	Are SDs significantly different (P < 0.05)?											Are SDs significantly different (P < 0.05)?										Are SDs significantly different (P < 0.05)?										Are SDs significantly different (P < 0.05)?										Are SDs significantly different (P < 0.05)?
	ANOVA table	SS	DF	MS	F (DFn, DFd)	P value						ANOVA table	SS	DF	MS	F (DFn, DFd)	P value					ANOVA table	SS	DF	MS	F (DFn, DFd)	P value					ANOVA table	SS	DF	MS	F (DFn, DFd)	P value					ANOVA table	SS	DF	MS	F (DFn, DFd)	P value
	Treatment (between columns)	34.89	2	17.45	F (2, 9) = 140.3	P<0.0001						Treatment (between columns)	56.3	2	28.15	F (2, 9) = 31.20	P<0.0001					Treatment (between columns)	854.9	2	427.5	F (2, 9) = 123.7	P<0.0001					Treatment (between columns)	4.391	2	2.196	F (2, 9) = 75.26	P<0.0001					Treatment (between columns)	165.2	2	82.61	F (2, 9) = 74.57	P<0.0001
	Residual (within columns)	1.119	9	0.1243								Residual (within columns)	8.121	9	0.9023							Residual (within columns)	31.1	9	3.456							Residual (within columns)	0.2626	9	0.02918							Residual (within columns)	9.969	9	1.108
	Total	36.01	11									Total	64.42	11								Total	886	11								Total	4.654	11								Total	175.2	11
	Data summary											Data summary										Data summary										Data summary										Data summary
	Number of treatments (columns)	3										Number of treatments (columns)	3									Number of treatments (columns)	3									Number of treatments (columns)	3									Number of treatments (columns)	3
	Number of values (total)	12										Number of values (total)	12									Number of values (total)	12									Number of values (total)	12									Number of values (total)	12
	Number of families	1										Number of families	1									Number of families	1									Number of families	1									Number of families	1
	Number of comparisons per family	3										Number of comparisons per family	3									Number of comparisons per family	3									Number of comparisons per family	3									Number of comparisons per family	3
	Alpha	0.05										Alpha	0.05									Alpha	0.05									Alpha	0.05									Alpha	0.05
	Tukey's multiple comparisons test	Mean Diff.	95.00% CI of diff.	Below threshold?	Summary	Adjusted P Value						Tukey's multiple comparisons test	Mean Diff.	95.00% CI of diff.	Below threshold?	Summary	Adjusted P Value					Tukey's multiple comparisons test	Mean Diff.	95.00% CI of diff.	Below threshold?	Summary	Adjusted P Value					Tukey's multiple comparisons test	Mean Diff.	95.00% CI of diff.	Below threshold?	Summary	Adjusted P Value					Tukey's multiple comparisons test	Mean Diff.	95.00% CI of diff.	Below threshold?	Summary	Adjusted P Value
	BSA vs. Dll4-Asp8x	-3.39	-4.086 to -2.694	Yes	****	<0.0001	A-B					BSA vs. Dll4-Asp8x	-4.044	-5.920 to -2.169	Yes	***	0.0005	A-B				BSA vs. Dll4-Asp8x	-15.6	-19.27 to -11.93	Yes	****	<0.0001	A-B				BSA vs. Dll4-Asp8x	-1.09	-1.427 to -0.7525	Yes	****	<0.0001	A-B				BSA vs. Dll4-Asp8x	-7.148	-9.226 to -5.070	Yes	****	<0.0001	A-B
	BSA vs. Dll4(E12)	-3.808	-4.504 to -3.112	Yes	****	<0.0001	A-C					BSA vs. Dll4(E12)	-4.996	-6.872 to -3.121	Yes	***	0.0001	A-C				BSA vs. Dll4(E12)	-19.55	-23.22 to -15.88	Yes	****	<0.0001	A-C				BSA vs. Dll4(E12)	-1.414	-1.752 to -1.077	Yes	****	<0.0001	A-C				BSA vs. Dll4(E12)	-8.435	-10.51 to -6.358	Yes	****	<0.0001	A-C
	Dll4-Asp8x vs. Dll4(E12)	-0.4177	-1.114 to 0.2785	No	ns	0.2661	B-C					Dll4-Asp8x vs. Dll4(E12)	-0.9519	-2.827 to 0.9235	No	ns	0.3729	B-C				Dll4-Asp8x vs. Dll4(E12)	-3.945	-7.615 to -0.2746	Yes	*	0.0361	B-C				Dll4-Asp8x vs. Dll4(E12)	-0.3248	-0.6620 to 0.01246	No	ns	0.0587	B-C				Dll4-Asp8x vs. Dll4(E12)	-1.287	-3.365 to 0.7907	No	ns	0.247	B-C
	Test details	Mean 1	Mean 2	Mean Diff.	SE of diff.	n1	n2	q	DF			Test details	Mean 1	Mean 2	Mean Diff.	SE of diff.	n1	n2	q	DF		Test details	Mean 1	Mean 2	Mean Diff.	SE of diff.	n1	n2	q	DF		Test details	Mean 1	Mean 2	Mean Diff.	SE of diff.	n1	n2	q	DF		Test details	Mean 1	Mean 2	Mean Diff.	SE of diff.	n1	n2	q
	BSA vs. Dll4-Asp8x	1	4.39	-3.39	0.2493	4	4	19.23	9			BSA vs. Dll4-Asp8x	1	5.044	-4.044	0.6717	4	4	8.515	9		BSA vs. Dll4-Asp8x	1	16.6	-15.6	1.315	4	4	16.79	9		BSA vs. Dll4-Asp8x	1	2.09	-1.09	0.1208	4	4	12.76	9		BSA vs. Dll4-Asp8x	1	8.148	-7.148	0.7442	4	4	13.58
	BSA vs. Dll4(E12)	1	4.808	-3.808	0.2493	4	4	21.6	9			BSA vs. Dll4(E12)	1	5.996	-4.996	0.6717	4	4	10.52	9		BSA vs. Dll4(E12)	1	20.55	-19.55	1.315	4	4	21.03	9		BSA vs. Dll4(E12)	1	2.414	-1.414	0.1208	4	4	16.56	9		BSA vs. Dll4(E12)	1	9.435	-8.435	0.7442	4	4	16.03
	Dll4-Asp8x vs. Dll4(E12)	4.39	4.808	-0.4177	0.2493	4	4	2.369	9			Dll4-Asp8x vs. Dll4(E12)	5.044	5.996	-0.9519	0.6717	4	4	2.004	9		Dll4-Asp8x vs. Dll4(E12)	16.6	20.55	-3.945	1.315	4	4	4.244	9		Dll4-Asp8x vs. Dll4(E12)	2.09	2.414	-0.3248	0.1208	4	4	3.803	9		Dll4-Asp8x vs. Dll4(E12)	8.148	9.435	-1.287	0.7442	4	4	2.446
[truncated: 10 more columns]
