# Supplementary material for: Induction of osteogenesis by bone-targeted Notch activation
Source: eLife. 2022 Feb 4;11:e60183. doi: 10.7554/eLife.60183 (PMC8880996; doi:10.7554/eLife.60183)
Supplement: Figure 1—source data 1. [file elife-60183-fig1-data1.xlsx]

## Sheet: Sheet1
Figure 1-source data 1
E	μCT-BV/TV(%)	Ctrl	Dll4(E12)				Trabecular Thickness (mm)	Control	Dll4(E12)				Connectivity Density(1/mm3)	Control	Dll4(E12)
		0.092	0.144					0.033	0.048					213.16	360.116
		0.098	0.188					0.037	0.048					184.489	848.025
		0.08	0.147					0.031	0.051					230.189	289.71
		0.096	0.158					0.038	0.046					174.319	708.867
		0.151	0.172					0.037	0.04					283.996	998.488
	Table Analyzed	μCT-BV/TV					Table Analyzed	Trabecular thickness (mm)					Table Analyzed	Connectivity Density (1/mm^3)
	Column B	Dll4(E12)					Column B	Dll4(E12)					Column B	Dll4(E12)
	vs.	vs.					vs.	vs.					vs.	vs.
	Column A	Ctrl					Column A	Ctrl					Column A	Ctrl
	Unpaired t test with Welch's correction						Unpaired t test with Welch's correction						Unpaired t test with Welch's correction
	P value	0.0056					P value	0.0013					P value	0.036
	P value summary	**					P value summary	**					P value summary	*
	Significantly different (P < 0.05)?	Yes					Significantly different (P < 0.05)?	Yes					Significantly different (P < 0.05)?	Yes
	One- or two-tailed P value?	Two-tailed					One- or two-tailed P value?	Two-tailed					One- or two-tailed P value?	Two-tailed
	Welch-corrected t, df	t=3.952, df=6.962					Welch-corrected t, df	t=4.999, df=7.370					Welch-corrected t, df	t=3.054, df=4.160
	How big is the difference?						How big is the difference?						How big is the difference?
	Mean of column A	0.1034					Mean of column A	0.0352					Mean of column A	217.2
	Mean of column B	0.1618					Mean of column B	0.0466					Mean of column B	641
	Difference between means (B - A) ± SEM	0.05840 ± 0.01478					Difference between means (B - A) ± SEM	0.01140 ± 0.002280					Difference between means (B - A) ± SEM	423.8 ± 138.8
	95% confidence interval	0.02342 to 0.09338					95% confidence interval	0.006062 to 0.01674					95% confidence interval	44.31 to 803.3
	R squared (eta squared)	0.6916					R squared (eta squared)	0.7723					R squared (eta squared)	0.6916
	F test to compare variances						F test to compare variances						F test to compare variances
	F, DFn, Dfd	2.258, 4, 4					F, DFn, Dfd	1.826, 4, 4					F, DFn, Dfd	49.97, 4, 4
	P value	0.4497					P value	0.574					P value	0.0023
	P value summary	ns					P value summary	ns					P value summary	**
	Significantly different (P < 0.05)?	No					Significantly different (P < 0.05)?	No					Significantly different (P < 0.05)?	Yes
	Model comparison	SS	DF	Probability it is correct			Model comparison	SS	DF	Probability it is correct			Model comparison	SS	DF	Probability it is correct
	Null H. Population means identical	0.01289	9	3.663%			Null H. Population means identical	0.0004289	9	0.7095%			Null H. Population means identical	834158	9	15.17%
	Alternative H: Distinct population means	0.004368	8	96.34%			Alternative H: Distinct population means	0.000104	8	99.29%			Alternative H: Distinct population means	385119	8	84.83%
	Ratio of probabilities			26.3			Ratio of probabilities			140			Ratio of probabilities			5.593
	Difference in AICc			6.539			Difference in AICc			9.883			Difference in AICc			3.443
	Data analyzed						Data analyzed						Data analyzed
	Sample size, column A	5					Sample size, column A	5					Sample size, column A	5
	Sample size, column B	5					Sample size, column B	5					Sample size, column B	5
	Trabecular separation (mm)	Ctrl	Dll4(E12)				Trabecular number (mm-1)	Ctrl	Dll4(E12)				ES/BS (%)	Ctrl	Dll4(E12)				Ob.S/BS(%)	Ctrl	Dll4(E12)
		0.214	0.252					4.529	3.974					5.78991	6.60295					16.6526	36.4972
		0.206	0.194					4.6	5.201					5.42071	5.01193					15.5072	45.3471
		0.226	0.221					4.3	4.407					3.83562	4.72618					24.7525	32.7534
		0.226	0.195					4.281	4.983					3.67075	5.98032					13.0618	36.5415
		0.176	0.182					5.364	5.367					5.89336	4.70175					12.6858	34.2404
	Table Analyzed	Trabecular separation (mm)					Table Analyzed	Trabecular number (mm-1)					Table Analyzed	ES/BS (%)					Table Analyzed	Ob.S/BS(%)
	Column B	Dll4(E12)					Column B	Dll4(E12)					Column B	Dll4(E12)					Column B	Dll4(E12)
	vs.	vs.					vs.	vs.					vs.	vs.					vs.	vs.
	Column A	Ctrl					Column A	Ctrl					Column A	Ctrl					Column A	Ctrl
	Unpaired t test with Welch's correction						Unpaired t test with Welch's correction						Mann Whitney test						Mann Whitney test
	P value	0.9604					P value	0.6144					P value	0.5476					P value	0.0079
	P value summary	ns					P value summary	ns					Exact or approximate P value?	Exact					Exact or approximate P value?	Exact
	Significantly different (P < 0.05)?	No					Significantly different (P < 0.05)?	No					P value summary	ns					P value summary	**
	One- or two-tailed P value?	Two-tailed					One- or two-tailed P value?	Two-tailed					Significantly different (P < 0.05)?	No					Significantly different (P < 0.05)?	Yes
	Welch-corrected t, df	t=0.05142, df=7.347					Welch-corrected t, df	t=0.5257, df=7.462					One- or two-tailed P value?	Two-tailed					One- or two-tailed P value?	Two-tailed
													Sum of ranks in column A,B	24 , 31					Sum of ranks in column A,B	15 , 40
	How big is the difference?						How big is the difference?						Mann-Whitney U	9					Mann-Whitney U	0
	Mean of column A	0.2096					Mean of column A	4.615
	Mean of column B	0.2088					Mean of column B	4.786					Difference between medians						Difference between medians
	Difference between means (B - A) ± SEM	-0.0008000 ± 0.01556					Difference between means (B - A) ± SEM	0.1716 ± 0.3264					Median of column A	5.421, n=5					Median of column A	15.51, n=5
	95% confidence interval	-0.03724 to 0.03564					95% confidence interval	-0.5907 to 0.9339					Median of column B	5.012, n=5					Median of column B	36.50, n=5
	R squared (eta squared)	0.0003597					R squared (eta squared)	0.03571					Difference: Actual	-0.4088					Difference: Actual	20.99
													Difference: Hodges-Lehmann	0.7096					Difference: Hodges-Lehmann	20.59
	F test to compare variances						F test to compare variances
	F, DFn, Dfd	1.850, 4, 4					F, DFn, Dfd	1.734, 4, 4
	P value	0.566					P value	0.6069
	P value summary	ns					P value summary	ns
	Significantly different (P < 0.05)?	No					Significantly different (P < 0.05)?	No
	Model comparison	SS	DF	Probability it is correct			Model comparison	SS	DF	Probability it is correct
	Null H. Population means identical	0.004844	9	89.48%			Null H. Population means identical	2.205	9	87.79%
	Alternative H: Distinct population means	0.004842	8	10.52%			Alternative H: Distinct population means	2.131	8	12.21%
	Ratio of probabilities			8.51			Ratio of probabilities			7.193
	Difference in AICc			-4.282			Difference in AICc			-3.946
	Data analyzed						Data analyzed
	Sample size, column A	5					Sample size, column A	5
	Sample size, column B	5					Sample size, column B	5
F	MAR (μm2/μm/day)	Ctrl	Dll4(E12)				BFR (μm3/μm2/day)	Ctrl	Dll4(E12)
		0.99	1.69					0.99	1.34
		1.03	1.73					0.93	1.31
		1.06	1.44					0.74	1.4
		0.98	2.14					0.84	1.45
		0.73	1.76					0.73	1.59
	Table Analyzed	MAR					Table Analyzed	BFR
	Column B	Dll4(E12)					Column B	Dll4(E12)
	vs.	vs.					vs.	vs.
	Column A	Ctrl					Column A	Ctrl
	Unpaired t test with Welch's correction						Unpaired t test with Welch's correction
	P value	0.0008					P value	<0.0001
	P value summary	***					P value summary	****
	Significantly different (P < 0.05)?	Yes					Significantly different (P < 0.05)?	Yes
	One- or two-tailed P value?	Two-tailed					One- or two-tailed P value?	Two-tailed
	Welch-corrected t, df	t=6.264, df=6.038					Welch-corrected t, df	t=8.041, df=7.988
	How big is the difference?						How big is the difference?
	Mean of column A	0.958					Mean of column A	0.846
	Mean of column B	1.752					Mean of column B	1.418
	Difference between means (B - A) ± SEM	0.7940 ± 0.1268					Difference between means (B - A) ± SEM	0.5720 ± 0.07113
	95% confidence interval	0.4843 to 1.104					95% confidence interval	0.4079 to 0.7361
	R squared (eta squared)	0.8666					R squared (eta squared)	0.89
	F test to compare variances						F test to compare variances
	F, DFn, Dfd	3.652, 4, 4					F, DFn, Dfd	1.079, 4, 4
	P value	0.2375					P value	0.9431
	P value summary	ns					P value summary	ns
	Significantly different (P < 0.05)?	No					Significantly different (P < 0.05)?	No
	Model comparison	SS	DF	Probability it is correct			Model comparison	SS	DF	Probability it is correct
	Null H. Population means identical	1.897	9	0.1186%			Null H. Population means identical	0.9192	9	0.01379%
	Alternative H: Distinct population means	0.3214	8	99.88%			Alternative H: Distinct population means	0.1012	8	99.99%
	Ratio of probabilities			841.9			Ratio of probabilities			7251
	Difference in AICc			13.47			Difference in AICc			17.78
	Data analyzed						Data analyzed
	Sample size, column A	5					Sample size, column A	5
	Sample size, column B	5					Sample size, column B	5
