# Supplementary material for: Induction of osteogenesis by bone-targeted Notch activation
Source: eLife. 2022 Feb 4;11:e60183. doi: 10.7554/eLife.60183 (PMC8880996; doi:10.7554/eLife.60183)
Supplement: Figure 2—figure supplement 1—source data 1. [file elife-60183-fig2-figsupp1-data1.xlsx]

## Sheet: Sheet1
Figure 2-figure supplement 1-source data 1
	Inflammatory cytokines analysis of Dll4 variant injected mice vs control
			Injection control			Dll4 variant injected
		IL-23	1.05	0.77	0.77	1.15	2.27	1.11
		IL-1alpha	12.33	2.1	34.23	9.77	9.69	6.84
		IFN-gama	2.53	1.79	2.37	5.44	2.61	2.61
		TNF-alpha	6.89	2.98	0	3.25	7.7	2.43
		MCP-1	4.81	3.41	6.17	7.21	26.48	4.15
		IL-12p70	1.96	1.96	1.96	1.96	1.96	3.99
		IL-1bebta	19.02	4.5	0	19.35	6.27	20.52
		IL-10	97.85	25.67	51.9	99.27	38.33	91.96
		IL-6	11.6	8.05	56.4	20.1	15.09	27.07
		IL-27	61.32	51.49	13.54	72.05	40.12	121.43
		IL-17A	10.96	6.72	2.08	13.99	6.72	50.2
		IFN-beta	12.85	6.07	3.19	12.71	6.96	24.54
		GM-CSF	19.06	6.14	3.42	20.78	7.04	39.04
	Table Analyzed	Inflammatory cytokines analysis of Dll4 variant injected mice vs control
	Column A	Injection Ctrl
	vs.	vs.
	Column B	Dll4 variant injected
	Test details
	Test name	Unpaired t test with Welch correction
	Variance assumption	Individual variance for each group
	Multiple comparisons	Set P value threshold
	Method	No correction for multiple comparisons
	Alpha	0.05
	Number of tests performed	13
	Number of rows omitted	0
		Below threshold?	P value	Mean of Injection Ctrl	Mean of Dll4 variant injected	Difference	SE of difference	t ratio	df
	IL-23	No	0.226913	0.8633	1.51	-0.6467	0.3915	1.652	2.24
	IL-1alpha	No	0.514445	16.22	8.767	7.453	9.526	0.7824	2.041
	IFN-gama	No	0.293903	2.23	3.553	-1.323	0.9697	1.365	2.226
	TNF-alpha	No	0.674648	3.29	4.46	-1.17	2.581	0.4533	3.853
	MCP-1	No	0.379676	4.797	12.61	-7.817	7.035	1.111	2.052
	IL-12p70	No	0.42265	1.96	2.637	-0.6767	0.6767	1	2
	IL-1bebta	No	0.364759	7.84	15.38	-7.54	7.335	1.028	3.808
	IL-10	No	0.561681	58.47	76.52	-18.05	28.53	0.6325	3.966
	IL-6	No	0.798025	25.35	20.75	4.597	15.94	0.2883	2.199
	IL-27	No	0.28034	42.12	77.87	-35.75	27.78	1.287	3.327
	IL-17A	No	0.331729	6.587	23.64	-17.05	13.69	1.246	2.145
	IFN-beta	No	0.298285	7.37	14.74	-7.367	5.914	1.246	3.12
	GM-CSF	No	0.309393	9.54	22.29	-12.75	10.45	1.22	3.01
