# Supplementary material for: Induction of osteogenesis by bone-targeted Notch activation
Source: eLife. 2022 Feb 4;11:e60183. doi: 10.7554/eLife.60183 (PMC8880996; doi:10.7554/eLife.60183)
Supplement: Figure 2—figure supplement 2—source data 1. [file elife-60183-fig2-figsupp2-data1.xlsx]

## Sheet: Sheet1
Figure 2-figure supplement 2-source data 1
A	Liver Dextran					B	Spleen Dextran					C	Lung Dextran
		Ctrl	Dll4(E12)					Ctrl	Dll4(E12)					Ctrl	Dll4(E12)
		50.8724	69.9647					163.154	376.392					2.68177	2.1771
		170.239	120.567					208.705	195.082					8.22048	10.4326
		121.041	147.556					34.3926	88.1427					7.15766	17.3215
		123.228	128.803					72.6612	157.831					23.5406	21.0188
		47.0137	246.609					73.9372	49.6287					6.53824	2.72087
	Table Analyzed	Liver Dextran					Table Analyzed	Spleen Dextran					Table Analyzed	Lung Dextran
	Column B	Dll4(E12)					Column B	Dll4(E12)					Column B	Dll4(E12)
	vs.	vs.					vs.	vs.					vs.	vs.
	Column A	Ctrl					Column A	Ctrl					Column A	Ctrl
	Unpaired t test with Welch's correction						Unpaired t test with Welch's correction						Unpaired t test with Welch's correction
	P value	0.3142					P value	0.3716					P value	0.8376
	P value summary	ns					P value summary	ns					P value summary	ns
	Significantly different (P < 0.05)?	No					Significantly different (P < 0.05)?	No					Significantly different (P < 0.05)?	No
	One- or two-tailed P value?	Two-tailed					One- or two-tailed P value?	Two-tailed					One- or two-tailed P value?	Two-tailed
	Welch-corrected t, df	t=1.077, df=7.681					Welch-corrected t, df	t=0.9613, df=6.353					Welch-corrected t, df	t=0.2117, df=7.980
	How big is the difference?						How big is the difference?						How big is the difference?
	Mean of column A	102.5					Mean of column A	110.6					Mean of column A	9.628
	Mean of column B	142.7					Mean of column B	173.4					Mean of column B	10.73
	Difference between means (B - A) ± SEM	40.22 ± 37.35					Difference between means (B - A) ± SEM	62.85 ± 65.38					Difference between means (B - A) ± SEM	1.106 ± 5.226
	95% confidence interval	-46.53 to 127.0					95% confidence interval	-95.00 to 220.7					95% confidence interval	-10.95 to 13.16
	R squared (eta squared)	0.1312					R squared (eta squared)	0.127					R squared (eta squared)	0.005586
	F test to compare variances						F test to compare variances						F test to compare variances
	F, DFn, Dfd	1.512, 4, 4					F, DFn, Dfd	3.075, 4, 4					F, DFn, Dfd	1.105, 4, 4
	P value	0.6984					P value	0.3022					P value	0.9252
	P value summary	ns					P value summary	ns					P value summary	ns
	Significantly different (P < 0.05)?	No					Significantly different (P < 0.05)?	No					Significantly different (P < 0.05)?	No
	Model comparison	SS	DF	Probability it is correct			Model comparison	SS	DF	Probability it is correct			Model comparison	SS	DF	Probability it is correct
	Null H. Population means identical	31944	9	81.25%			Null H. Population means identical	95358	9	83.15%			Null H. Population means identical	549.2	9	89.23%
	Alternative H: Distinct population means	27900	8	18.75%			Alternative H: Distinct population means	85484	8	16.85%			Alternative H: Distinct population means	546.1	8	10.77%
	Ratio of probabilities			4.332			Ratio of probabilities			4.935			Ratio of probabilities			8.289
	Difference in AICc			-2.932			Difference in AICc			-3.193			Difference in AICc			-4.23
	Data analyzed						Data analyzed						Data analyzed
	Sample size, column A	5					Sample size, column A	5					Sample size, column A	5
	Sample size, column B	5					Sample size, column B	5					Sample size, column B	5
