# Supplementary material for: Induction of osteogenesis by bone-targeted Notch activation
Source: eLife. 2022 Feb 4;11:e60183. doi: 10.7554/eLife.60183 (PMC8880996; doi:10.7554/eLife.60183)
Supplement: Figure 2—source data 1. [file elife-60183-fig2-data1.xlsx]

## Sheet: Sheet1
Figure 2-source data 1
D	CD4 CD8 T cells					F	Bone Dextran
		Ctrl	Dll4(E12)						Ctrl					Dll4(E12)
		79.648	83.299					Metaphysis	129.771	105.631	72.4762	56.5603	100.099	88.303	52.9912	78.4427	47.4195	97.3219
		74.931	82.021					Diaphysis	146.798	87.3825	178.376	104.191	133.929	122.36	130.051	163.691	145.636	157.375
		80.663	83.271
							Table Analyzed	Bone Dextran
	Column B	Dll4(E12)
	vs.	vs.					Two-way ANOVA	Ordinary
	Column A	Ctrl					Alpha	0.05
	Unpaired t test with Welch's correction						Source of Variation	% of total variation	P value	P value summary	Significant?
	P value	0.1211					Interaction	5.131	0.1803	ns	No
	P value summary	ns					Anatomy	52.85	0.0004	***	Yes
	Significantly different (P < 0.05)?	No					Treatment	0.1807	0.796	ns	No
	One- or two-tailed P value?	Two-tailed
	Welch-corrected t, df	t=2.451, df=2.227					ANOVA table	SS	DF	MS	F (DFn, DFd)	P value
							Interaction	1420	1	1420	F (1, 16) = 1.963	P=0.1803
	How big is the difference?						Anatomy	14622	1	14622	F (1, 16) = 20.21	P=0.0004
	Mean of column A	78.41					Treatment	50	1	50	F (1, 16) = 0.06912	P=0.7960
	Mean of column B	82.86					Residual	11573	16	723.3
	Difference between means (B - A) ± SEM	4.450 ± 1.816
	95% confidence interval	-2.646 to 11.55					Difference between column means
	R squared (eta squared)	0.7295					Mean of Ctrl	111.5
							Mean of Dll4(E12)	108.4
	F test to compare variances						Difference between means	3.162
	F, DFn, Dfd	17.56, 2, 2					SE of difference	12.03
	P value	0.1078					95% CI of difference	-22.34 to 28.66
	P value summary	ns
	Significantly different (P < 0.05)?	No					Difference between row means
							Mean of Metaphysis	82.9
	Model comparison	SS	DF	Probability it is correct			Mean of Diaphysis	137
	Null H. Population means identical	49.48	5	90.46%			Difference between means	-54.08
	Alternative H: Distinct population means	19.78	4	9.542%			SE of difference	12.03
	Ratio of probabilities			9.479			95% CI of difference	-79.57 to -28.58
	Difference in AICc			-4.498
							Interaction CI
	Data analyzed						Mean diff, A1 - B1	20.01
	Sample size, column A	3					Mean diff, A2 - B2	-13.69
	Sample size, column B	3					(A1 -B1) - (A2 - B2)	33.7
							95% CI of difference	-17.30 to 84.69
							(B1 - A1) - (B2 - A2)	-33.7
							95% CI of difference	-84.69 to 17.30
							Data summary
							Number of columns (Treatment)	2
							Number of rows (Anatomy)	2
							Number of values	20
							Compare cell means regardless of rows and columns
							Number of families	1
							Number of comparisons per family	6
							Alpha	0.05
							Tukey's multiple comparisons test	Mean Diff.	95.00% CI of diff.	Below threshold?	Summary	Adjusted P Value
							Metaphysis:Ctrl vs. Metaphysis:Dll4(E12)	20.01	-28.65 to 68.68	No	ns	0.6496
							Metaphysis:Ctrl vs. Diaphysis:Ctrl	-37.23	-85.89 to 11.44	No	ns	0.1686
							Metaphysis:Ctrl vs. Diaphysis:Dll4(E12)	-50.92	-99.58 to -2.250	Yes	*	0.0387
							Metaphysis:Dll4(E12) vs. Diaphysis:Ctrl	-57.24	-105.9 to -8.575	Yes	*	0.0186
							Metaphysis:Dll4(E12) vs. Diaphysis:Dll4(E12)	-70.93	-119.6 to -22.26	Yes	**	0.0036
							Diaphysis:Ctrl vs. Diaphysis:Dll4(E12)	-13.69	-62.35 to 34.98	No	ns	0.8513
							Test details	Mean 1	Mean 2	Mean Diff.	SE of diff.	N1	N2	q	DF
							Metaphysis:Ctrl vs. Metaphysis:Dll4(E12)	92.91	72.9	20.01	17.01	5	5	1.664	16
							Metaphysis:Ctrl vs. Diaphysis:Ctrl	92.91	130.1	-37.23	17.01	5	5	3.095	16
							Metaphysis:Ctrl vs. Diaphysis:Dll4(E12)	92.91	143.8	-50.92	17.01	5	5	4.233	16
							Metaphysis:Dll4(E12) vs. Diaphysis:Ctrl	72.9	130.1	-57.24	17.01	5	5	4.759	16
							Metaphysis:Dll4(E12) vs. Diaphysis:Dll4(E12)	72.9	143.8	-70.93	17.01	5	5	5.897	16
							Diaphysis:Ctrl vs. Diaphysis:Dll4(E12)	130.1	143.8	-13.69	17.01	5	5	1.138	16
