# Supplementary material for: Induction of osteogenesis by bone-targeted Notch activation
Source: eLife. 2022 Feb 4;11:e60183. doi: 10.7554/eLife.60183 (PMC8880996; doi:10.7554/eLife.60183)
Supplement: Figure 3—figure supplement 2—source data 1. [file elife-60183-fig3-figsupp2-data1.xlsx]

## Sheet: Sheet1
Figure 3-figure supplement 2-source data 1
A	PDGFRb area/ DAPI area (%)			B	NG2 area/ DAPI area (%)			C	ACAN + cell number			D	SOX9 + cell number
		Ctrl	Dll4(E12)			Ctrl	Dll4(E12)			Ctrl	Dll4(E12)			Ctrl	Dll4(E12)
		22.6136	30.6412			18.9364	31.0393			594	1479			366	776
		22.4494	30.8544			17.7672	27.6909			1306	1250			617	726
		20.8235	26.352			23.3041	28.3684			1774	1012			977	499
	Table Analyzed	PDGFRb area/ DAPI area (%)			Table Analyzed	NG2 area/ DAPI area (%)			Table Analyzed	ACAN + cell number			Table Analyzed	SOX9 + cell number
	Column B	Dll4(E12)			Column B	Dll4(E12)			Column B	Dll4(E12)			Column B	Dll4(E12)
	vs.	vs.			vs.	vs.			vs.	vs.			vs.	vs.
	Column A	Ctrl			Column A	Ctrl			Column A	Ctrl			Column A	Ctrl
	Unpaired t test with Welch's correction				Unpaired t test with Welch's correction				Unpaired t test with Welch's correction				Unpaired t test with Welch's correction
	P value	0.0257			P value	0.0159			P value	0.956			P value	0.9492
	P value summary	*			P value summary	*			P value summary	ns			P value summary	ns
	Significantly different (P < 0.05)?	Yes			Significantly different (P < 0.05)?	Yes			Significantly different (P < 0.05)?	No			Significantly different (P < 0.05)?	No
	One- or two-tailed P value?	Two-tailed			One- or two-tailed P value?	Two-tailed			One- or two-tailed P value?	Two-tailed			One- or two-tailed P value?	Two-tailed
	Welch-corrected t, df	t=4.651, df=2.593			Welch-corrected t, df	t=4.582, df=3.296			Welch-corrected t, df	t=0.06059, df=2.603			Welch-corrected t, df	t=0.06947, df=2.877
	How big is the difference?				How big is the difference?				How big is the difference?				How big is the difference?
	Mean of column A	21.96			Mean of column A	20			Mean of column A	1225			Mean of column A	653.3
	Mean of column B	29.28			Mean of column B	29.03			Mean of column B	1247			Mean of column B	667
	Difference between means (B - A) ± SEM	7.320 ± 1.574			Difference between means (B - A) ± SEM	9.030 ± 1.971			Difference between means (B - A) ± SEM	22.33 ± 368.6			Difference between means (B - A) ± SEM	13.67 ± 196.7
	95% confidence interval	1.837 to 12.80			95% confidence interval	3.066 to 14.99			95% confidence interval	-1259 to 1303			95% confidence interval	-627.8 to 655.1
	R squared (eta squared)	0.893			R squared (eta squared)	0.8643			R squared (eta squared)	0.001408			R squared (eta squared)	0.001674
	F test to compare variances				F test to compare variances				F test to compare variances				F test to compare variances
	F, DFn, Dfd	6.590, 2, 2			F, DFn, Dfd	2.718, 2, 2			F, DFn, Dfd	6.475, 2, 2			F, DFn, Dfd	4.328, 2, 2
	P value	0.2635			P value	0.538			P value	0.2676			P value	0.3754
	P value summary	ns			P value summary	ns			P value summary	ns			P value summary	ns
	Significantly different (P < 0.05)?	No			Significantly different (P < 0.05)?	No			Significantly different (P < 0.05)?	No			Significantly different (P < 0.05)?	No
	Data analyzed				Data analyzed				Data analyzed				Data analyzed
	Sample size, column A	3			Sample size, column A	3			Sample size, column A	3			Sample size, column A	3
	Sample size, column B	3			Sample size, column B	3			Sample size, column B	3			Sample size, column B	3
