# Supplementary material for: Induction of osteogenesis by bone-targeted Notch activation
Source: eLife. 2022 Feb 4;11:e60183. doi: 10.7554/eLife.60183 (PMC8880996; doi:10.7554/eLife.60183)
Supplement: Figure 3—source data 1. [file elife-60183-fig3-data1.xlsx]

## Sheet: Sheet1
Figure 3-source data 1
A	Osterix+cells/mm				B	Runx2+ cells/ mm2					C	OPN area/ DAPI area (%)			C	OCN area/ DAPI area (%)
		Ctrl	Dll4(E12)				Ctrl	Dll4(E12)					Ctrl	Dll4(E12)			Ctrl	Dll4(E12)
		148	255				286	189					5.00186	10.6542			18.1423	31.3906
		93	229				420	104					6.16	14.8982			20.6382	33.1488
		170	192				263	174					7.44889	15.9625			17.7473	26.1119
		113	310				338	240
												Table Analyzed	OPN area/ DAPI area (%)			Table Analyzed	OCN area/ DAPI area (%)
						Table Analyzed	RUNX2_cell number/ 400 um2
	Table Analyzed	OSX_cell number/ 400 um2										Column B	Dll4(E12)			Column B	Dll4(E12)
						Column B	Dll4(E12)					vs.	vs.			vs.	vs.
	Column B	Dll4(E12)				vs.	vs.					Column A	Ctrl			Column A	Ctrl
	vs.	vs.				Column A	Ctrl
	Column A	Ctrl										Unpaired t test with Welch's correction				Unpaired t test with Welch's correction
						Unpaired t test						P value	0.0276			P value	0.0201
	Unpaired t test					P value	0.0153					P value summary	*			P value summary	*
	P value	0.0087				P value summary	*					Significantly different (P < 0.05)?	Yes			Significantly different (P < 0.05)?	Yes
	P value summary	**				Significantly different (P < 0.05)?	Yes					One- or two-tailed P value?	Two-tailed			One- or two-tailed P value?	Two-tailed
	Significantly different (P < 0.05)?	Yes				One- or two-tailed P value?	Two-tailed					Welch-corrected t, df	t=4.316, df=2.733			Welch-corrected t, df	t=4.945, df=2.709
	One- or two-tailed P value?	Two-tailed				t, df	t=3.354, df=6
	t, df	t=3.822, df=6										How big is the difference?				How big is the difference?
						How big is the difference?						Mean of column A	6.204			Mean of column A	18.84
	How big is the difference?					Mean of column A	326.8					Mean of column B	13.84			Mean of column B	30.22
	Mean of column A	131				Mean of column B	176.8					Difference between means (B - A) ± SEM	7.635 ± 1.769			Difference between means (B - A) ± SEM	11.37 ± 2.300
	Mean of column B	246.5				Difference between means (B - A) ± SEM	-150.0 ± 44.72					95% confidence interval	1.682 to 13.59			95% confidence interval	3.589 to 19.16
	Difference between means (B - A) ± SEM	115.5 ± 30.22				95% confidence interval	-259.4 to -40.58					R squared (eta squared)	0.8721			R squared (eta squared)	0.9003
	95% confidence interval	41.55 to 189.4				R squared (eta squared)	0.6522
	R squared (eta squared)	0.7088										F test to compare variances				F test to compare variances
						F test to compare variances						F, DFn, Dfd	5.264, 2, 2			F, DFn, Dfd	5.458, 2, 2
	F test to compare variances					F, DFn, Dfd	1.539, 3, 3					P value	0.3193			P value	0.3097
	F, DFn, Dfd	2.063, 3, 3				P value	0.7317					P value summary	ns			P value summary	ns
	P value	0.5672				P value summary	ns					Significantly different (P < 0.05)?	No			Significantly different (P < 0.05)?	No
	P value summary	ns				Significantly different (P < 0.05)?	No
	Significantly different (P < 0.05)?	No										Data analyzed				Data analyzed
						Data analyzed						Sample size, column A	3			Sample size, column A	3
	Data analyzed					Sample size, column A	4					Sample size, column B	3			Sample size, column B	3
	Sample size, column A	4				Sample size, column B	4
	Sample size, column B	4
D	Oc.S/BS				D	N.Oc/B.Pm					E	Adipocytes number/ mm^2
		Ctrl	Dll4(E12)				Ctrl	Dll4(E12)					Ctrl	Dll4(E12)
		40	32				13	11					40	43
		37	46				15	12					31	51
		34	57				14	19					31	52
		39	35				17	18
												Table Analyzed	Adipocytes number/ mm^2
	Table Analyzed	Oc.S/BS				Table Analyzed	N.Oc/B.Pm
												Column B	Dll4(E12)
	Column B	Dll4(E12)				Column B	Dll4(E12)					vs.	vs.
	vs.	vs.				vs.	vs.					Column A	Ctrl
	Column A	Ctrl				Column A	Ctrl
												Unpaired t test with Welch's correction
	Unpaired t test with Welch's correction					Unpaired t test with Welch's correction						P value	0.024
	P value	0.4496				P value	0.9155					P value summary	*
	P value summary	ns				P value summary	ns					Significantly different (P < 0.05)?	Yes
	Significantly different (P < 0.05)?	No				Significantly different (P < 0.05)?	No					One- or two-tailed P value?	Two-tailed
	One- or two-tailed P value?	Two-tailed				One- or two-tailed P value?	Two-tailed					Welch-corrected t, df	t=3.546, df=3.989
	Welch-corrected t, df	t=0.8554, df=3.323				Welch-corrected t, df	t=0.1130, df=4.019
												How big is the difference?
	How big is the difference?					How big is the difference?						Mean of column A	34
	Mean of column A	37.5				Mean of column A	14.75					Mean of column B	48.67
	Mean of column B	42.5				Mean of column B	15					Difference between means (B - A) ± SEM	14.67 ± 4.137
	Difference between means (B - A) ± SEM	5.000 ± 5.845				Difference between means (B - A) ± SEM	0.2500 ± 2.213					95% confidence interval	3.170 to 26.16
	95% confidence interval	-12.62 to 22.62				95% confidence interval	-5.882 to 6.382					R squared (eta squared)	0.7591
	R squared (eta squared)	0.1805				R squared (eta squared)	0.003167
												F test to compare variances
	F test to compare variances					F test to compare variances						F, DFn, Dfd	1.110, 2, 2
	F, DFn, Dfd	18.52, 3, 3				F, DFn, Dfd	5.714, 3, 3					P value	0.9481
	P value	0.0387				P value	0.1862					P value summary	ns
	P value summary	*				P value summary	ns					Significantly different (P < 0.05)?	No
	Significantly different (P < 0.05)?	Yes				Significantly different (P < 0.05)?	No
												Model comparison	SS	DF	Probability it is correct
	Model comparison	SS	DF	Probability it is correct		Model comparison	SS	DF	Probability it is correct			Null H. Population means identical	425.3	5	67.61%
	Null H. Population means identical	460	7	91.21%		Null H. Population means identical	58.88	7	94.22%			Alternative H: Distinct population means	102.7	4	32.39%
	Alternative H: Distinct population means	410	6	8.789%		Alternative H: Distinct population means	58.75	6	5.779%			Ratio of probabilities			2.087
	Ratio of probabilities			10.38		Ratio of probabilities			16.31			Difference in AICc			-1.472
	Difference in AICc			-4.679		Difference in AICc			-5.583
												Data analyzed
	Data analyzed					Data analyzed						Sample size, column A	3
	Sample size, column A	4				Sample size, column A	4					Sample size, column B	3
	Sample size, column B	4				Sample size, column B	4
