# Supplementary material for: Induction of osteogenesis by bone-targeted Notch activation
Source: eLife. 2022 Feb 4;11:e60183. doi: 10.7554/eLife.60183 (PMC8880996; doi:10.7554/eLife.60183)
Supplement: Figure 4—source data 1. [file elife-60183-fig4-data1.xlsx]

## Sheet: Sheet1
Figure 4-source data 1
C	VEGFR3 low area %				D	BCAM+ Arteriole/mm^2
		Ctrl	Dll4(E12)				Ctrl	Dll4(E12)
		7.91	47.28				9	7
		21.98	53.91				8	4
		34.9	50.42				9	8
		18.02	43
		18.8	56.18			Table Analyzed	BCAM+ Arteriole/mm^2
	Table Analyzed	VEGFR3low area %				Column B	Dll4(E12)
						vs.	vs.
	Column B	Dll4(E12)				Column A	Ctrl
	vs.	vs.
	Column A	Ctrl				Unpaired t test with Welch's correction
						P value	0.1852
	Unpaired t test with Welch's correction					P value summary	ns
	P value	0.0008				Significantly different (P < 0.05)?	No
	P value summary	***				One- or two-tailed P value?	Two-tailed
	Significantly different (P < 0.05)?	Yes				Welch-corrected t, df	t=1.871, df=2.306
	One- or two-tailed P value?	Two-tailed
	Welch-corrected t, df	t=6.047, df=6.150				How big is the difference?
						Mean of column A	8.667
	How big is the difference?					Mean of column B	6.333
	Mean of column A	20.32				Difference between means (B - A) ± SEM	-2.333 ± 1.247
	Mean of column B	50.16				95% confidence interval	-7.072 to 2.405
	Difference between means (B - A) ± SEM	29.84 ± 4.934				R squared (eta squared)	0.6028
	95% confidence interval	17.83 to 41.84
	R squared (eta squared)	0.856				F test to compare variances
						F, DFn, Dfd	13.00, 2, 2
	F test to compare variances					P value	0.1429
	F, DFn, Dfd	3.429, 4, 4				P value summary	ns
	P value	0.2598				Significantly different (P < 0.05)?	No
	P value summary	ns
	Significantly different (P < 0.05)?	No				Model comparison	SS	DF	Probability it is correct
						Null H. Population means identical	17.5	5	95.75%
	Model comparison	SS	DF	Probability it is correct		Alternative H: Distinct population means	9.333	4	4.253%
	Null H. Population means identical	2712	9	0.1586%		Ratio of probabilities			22.51
	Alternative H: Distinct population means	486.9	8	99.84%		Difference in AICc			-6.228
	Ratio of probabilities			629.5
	Difference in AICc			12.89		Data analyzed
						Sample size, column A	3
	Data analyzed					Sample size, column B	3
	Sample size, column A	5
	Sample size, column B	5
