# Supplementary material for: Induction of osteogenesis by bone-targeted Notch activation
Source: eLife. 2022 Feb 4;11:e60183. doi: 10.7554/eLife.60183 (PMC8880996; doi:10.7554/eLife.60183)
Supplement: Figure 5—figure supplement 1—source data 1. [file elife-60183-fig5-figsupp1-data1.xlsx]

## Sheet: Sheet1
Figure 5-figure supplement 1-source data 1
D	Soluble-Jag1-Hs DLL4										Soluble-Jag1-Hs HEY1										Soluble-Jag1-Hs HEY2										Soluble-Jag1-Hs HES1										Soluble-Jag1-Hs EFNB2
		BSA	JAG1-Asp8x	JAG1-JV1								BSA	JAG1-Asp8x	JAG1-JV1								BSA	JAG1-Asp8x	JAG1-JV1								BSA	JAG1-Asp8x	JAG1-JV1								BSA	JAG1-Asp8x	JAG1-JV1
		1	1.18	0.82								1	0.55	0.48								1	0.46	0.59								1	1.74	1.17								1	1.04	0.83
		1	1.13	0.85								1	0.53	0.39								1	0.52	0.72								1	1.07	1.24								1	1.01	0.85
		1	1.04	0.84								1	0.46	0.44								1	0.48	0.45								1	0.9	0.73								1	0.82	0.72
	Table Analyzed	Soluble-Jag1-Hs DLL4-qPCR_GAPDH_VIC_ctrl									Table Analyzed	Soluble-Jag1-Hs HEY1-qPCR_GAPDH_VIC-ctrl									Table Analyzed	Soluble-Jag1-Hs HEY2-qPCR_GAPDH_VIC-ctrl									Table Analyzed	Soluble-Jag1-Hs HES1-qPCR_GAPDH_VIC_ctrl									Table Analyzed	Soluble-Jag1-Hs EFNB2-qPCR_bGAPDH_VIC-ctrl
	Data sets analyzed	A-C									Data sets analyzed	A-C									Data sets analyzed	A-C									Data sets analyzed	A-C									Data sets analyzed	A-C
	ANOVA summary										ANOVA summary										ANOVA summary										ANOVA summary										ANOVA summary
	F	33.8									F	196.9									F	34.78									F	0.5168									F	5.207
	P value	0.0005									P value	<0.0001									P value	0.0005									P value	0.6208									P value	0.0488
	P value summary	***									P value summary	****									P value summary	***									P value summary	ns									P value summary	*
	Significant diff. among means (P < 0.05)?	Yes									Significant diff. among means (P < 0.05)?	Yes									Significant diff. among means (P < 0.05)?	Yes									Significant diff. among means (P < 0.05)?	No									Significant diff. among means (P < 0.05)?	Yes
	R squared	0.9185									R squared	0.985									R squared	0.9206									R squared	0.147									R squared	0.6345
	Brown-Forsythe test										Brown-Forsythe test										Brown-Forsythe test										Brown-Forsythe test										Brown-Forsythe test
	F (DFn, DFd)	2.547 (2, 6)									F (DFn, DFd)	1.350 (2, 6)									F (DFn, DFd)	3.092 (2, 6)									F (DFn, DFd)	1.011 (2, 6)									F (DFn, DFd)	0.8822 (2, 6)
	P value	0.1582									P value	0.328									P value	0.1194									P value	0.4185									P value	0.4615
	P value summary	ns									P value summary	ns									P value summary	ns									P value summary	ns									P value summary	ns
	Are SDs significantly different (P < 0.05)?	No									Are SDs significantly different (P < 0.05)?	No									Are SDs significantly different (P < 0.05)?	No									Are SDs significantly different (P < 0.05)?	No									Are SDs significantly different (P < 0.05)?	No
	Bartlett's test										Bartlett's test										Bartlett's test										Bartlett's test										Bartlett's test
	Bartlett's statistic (corrected)										Bartlett's statistic (corrected)										Bartlett's statistic (corrected)										Bartlett's statistic (corrected)										Bartlett's statistic (corrected)
	P value										P value										P value										P value										P value
	P value summary										P value summary										P value summary										P value summary										P value summary
	Are SDs significantly different (P < 0.05)?										Are SDs significantly different (P < 0.05)?										Are SDs significantly different (P < 0.05)?										Are SDs significantly different (P < 0.05)?										Are SDs significantly different (P < 0.05)?
	ANOVA table	SS	DF	MS	F (DFn, DFd)	P value					ANOVA table	SS	DF	MS	F (DFn, DFd)	P value					ANOVA table	SS	DF	MS	F (DFn, DFd)	P value					ANOVA table	SS	DF	MS	F (DFn, DFd)	P value					ANOVA table	SS	DF	MS	F (DFn, DFd)	P value
	Treatment (between columns)	0.1187	2	0.05934	F (2, 6) = 33.80	P=0.0005					Treatment (between columns)	0.5601	2	0.28	F (2, 6) = 196.9	P<0.0001					Treatment (between columns)	0.4444	2	0.2222	F (2, 6) = 34.78	P=0.0005					Treatment (between columns)	0.09429	2	0.04714	F (2, 6) = 0.5168	P=0.6208					Treatment (between columns)	0.06642	2	0.03321	F (2, 6) = 5.207	P=0.0488
	Residual (within columns)	0.01053	6	0.001756							Residual (within columns)	0.008533	6	0.001422							Residual (within columns)	0.03833	6	0.006389							Residual (within columns)	0.5473	6	0.09122							Residual (within columns)	0.03827	6	0.006378
	Total	0.1292	8								Total	0.5686	8								Total	0.4827	8								Total	0.6416	8								Total	0.1047	8
	Data summary										Data summary										Data summary										Data summary										Data summary
	Number of treatments (columns)	3									Number of treatments (columns)	3									Number of treatments (columns)	3									Number of treatments (columns)	3									Number of treatments (columns)	3
	Number of values (total)	9									Number of values (total)	9									Number of values (total)	9									Number of values (total)	9									Number of values (total)	9
	Number of families	1									Number of families	1									Number of families	1									Number of families	1									Number of families	1
	Number of comparisons per family	2									Number of comparisons per family	2									Number of comparisons per family	2									Number of comparisons per family	2									Number of comparisons per family	2
	Alpha	0.05									Alpha	0.05									Alpha	0.05									Alpha	0.05									Alpha	0.05
	Dunnett's multiple comparisons test	Mean Diff.	95.00% CI of diff.	Below threshold?	Summary	Adjusted P Value	A-?				Dunnett's multiple comparisons test	Mean Diff.	95.00% CI of diff.	Below threshold?	Summary	Adjusted P Value	A-?				Dunnett's multiple comparisons test	Mean Diff.	95.00% CI of diff.	Below threshold?	Summary	Adjusted P Value	A-?				Dunnett's multiple comparisons test	Mean Diff.	95.00% CI of diff.	Below threshold?	Summary	Adjusted P Value	A-?				Dunnett's multiple comparisons test	Mean Diff.	95.00% CI of diff.	Below threshold?	Summary	Adjusted P Value	A-?
	BSA vs. JAG1-Asp8x	-0.1167	-0.2146 to -0.01872	Yes	*	0.0253	B	JAG1-Asp8x			BSA vs. JAG1-Asp8x	0.4867	0.3985 to 0.5748	Yes	****	<0.0001	B	JAG1-Asp8x			BSA vs. JAG1-Asp8x	0.5133	0.3265 to 0.7002	Yes	***	0.0004	B	JAG1-Asp8x			BSA vs. JAG1-Asp8x	-0.2367	-0.9427 to 0.4694	No	ns	0.5618	B	JAG1-Asp8x			BSA vs. JAG1-Asp8x	0.04333	-0.1434 to 0.2300	No	ns	0.7425	B	JAG1-Asp8x
	BSA vs. JAG1-JV1	0.1633	0.06539 to 0.2613	Yes	**	0.0055	C	JAG1-JV1			BSA vs. JAG1-JV1	0.5633	0.4752 to 0.6515	Yes	****	<0.0001	C	JAG1-JV1			BSA vs. JAG1-JV1	0.4133	0.2265 to 0.6002	Yes	**	0.0013	C	JAG1-JV1			BSA vs. JAG1-JV1	-0.04667	-0.7527 to 0.6594	No	ns	0.9742	C	JAG1-JV1			BSA vs. JAG1-JV1	0.2	0.01331 to 0.3867	Yes	*	0.0386	C	JAG1-JV1
	Test details	Mean 1	Mean 2	Mean Diff.	SE of diff.	n1	n2	q	DF		Test details	Mean 1	Mean 2	Mean Diff.	SE of diff.	n1	n2	q	DF		Test details	Mean 1	Mean 2	Mean Diff.	SE of diff.	n1	n2	q	DF		Test details	Mean 1	Mean 2	Mean Diff.	SE of diff.	n1	n2	q	DF		Test details	Mean 1	Mean 2	Mean Diff.	SE of diff.	n1	n2	q	DF
	BSA vs. JAG1-Asp8x	1	1.117	-0.1167	0.03421	3	3	3.41	6		BSA vs. JAG1-Asp8x	1	0.5133	0.4867	0.03079	3	3	15.8	6		BSA vs. JAG1-Asp8x	1	0.4867	0.5133	0.06526	3	3	7.866	6		BSA vs. JAG1-Asp8x	1	1.237	-0.2367	0.2466	3	3	0.9597	6		BSA vs. JAG1-Asp8x	1	0.9567	0.04333	0.06521	3	3	0.6646	6
	BSA vs. JAG1-JV1	1	0.8367	0.1633	0.03421	3	3	4.774	6		BSA vs. JAG1-JV1	1	0.4367	0.5633	0.03079	3	3	18.29	6		BSA vs. JAG1-JV1	1	0.5867	0.4133	0.06526	3	3	6.333	6		BSA vs. JAG1-JV1	1	1.047	-0.04667	0.2466	3	3	0.1892	6		BSA vs. JAG1-JV1	1	0.8	0.2	0.06521	3	3	3.067	6
E	Immobilized Jag1-Hs DLL4										Immobilized Jag1-Hs HEY1										Immobilized Jag1-Hs HEY2										Immobilized Jag1-Hs HES1										Immobilized Jag1-Hs EFNB2
		BSA	JAG1-Asp8x	JAG1-JV1								BSA	JAG1-Asp8x	JAG1-JV1								BSA	JAG1-Asp8x	JAG1-JV1								BSA	JAG1-Asp8x	JAG1-JV1								BSA	JAG1-Asp8x	JAG1-JV1
		1	1.83	4.44								1	1.43	3.95								1	3.04	5.14								1	2.33	3.97								1	1.34	2.34
		1	1.3	3.39								1	1.22	2.88								1	3.16	7.53								1	1.88	3.6								1	1.1	2.02
		1	1.32	3.21								1	1.44	3.39								1	1.71	5								1	1.54	3.74								1	1.11	2.54
	Table Analyzed	Immobilized Jag1-Hs DLL4-qPCR_GAPDH_VIC									Table Analyzed	Immobilized Jag1-Hs HEY1-qPCR_GAPDH_VIC-ctrl									Table Analyzed	Immobilized Jag1-Hs HEY2-qPCR_GAPDH_VIC-ctrl									Table Analyzed	Immobilized Jag1-Hs HES1-qPCR_GAPDH_VIC_ctrl									Table Analyzed	Immobilized Jag1-Hs EFNB2-qPCR_GAPDH_VIC-ctrl
	Data sets analyzed	A-C									Data sets analyzed	A-C									Data sets analyzed	A-C									Data sets analyzed	A-C									Data sets analyzed	A-C
	ANOVA summary										ANOVA summary										ANOVA summary										ANOVA summary										ANOVA summary
	F	34.55									F	50.18									F	20.89									F	93.38									F	51.08
	P value	0.0005									P value	0.0002									P value	0.002									P value	<0.0001									P value	0.0002
	P value summary	***									P value summary	***									P value summary	**									P value summary	****									P value summary	***
	Significant diff. among means (P < 0.05)?	Yes									Significant diff. among means (P < 0.05)?	Yes									Significant diff. among means (P < 0.05)?	Yes									Significant diff. among means (P < 0.05)?	Yes									Significant diff. among means (P < 0.05)?	Yes
	R squared	0.9201									R squared	0.9436									R squared	0.8744									R squared	0.9689									R squared	0.9445
	Brown-Forsythe test										Brown-Forsythe test										Brown-Forsythe test										Brown-Forsythe test										Brown-Forsythe test
	F (DFn, DFd)	0.9546 (2, 6)									F (DFn, DFd)	2.901 (2, 6)									F (DFn, DFd)	0.6887 (2, 6)									F (DFn, DFd)	2.282 (2, 6)									F (DFn, DFd)	1.574 (2, 6)
	P value	0.4366									P value	0.1314									P value	0.538									P value	0.1832									P value	0.2822
	P value summary	ns									P value summary	ns									P value summary	ns									P value summary	ns									P value summary	ns
	Are SDs significantly different (P < 0.05)?	No									Are SDs significantly different (P < 0.05)?	No									Are SDs significantly different (P < 0.05)?	No									Are SDs significantly different (P < 0.05)?	No									Are SDs significantly different (P < 0.05)?	No
	Bartlett's test										Bartlett's test										Bartlett's test										Bartlett's test										Bartlett's test
	Bartlett's statistic (corrected)										Bartlett's statistic (corrected)										Bartlett's statistic (corrected)										Bartlett's statistic (corrected)										Bartlett's statistic (corrected)
	P value										P value										P value										P value										P value
	P value summary										P value summary										P value summary										P value summary										P value summary
	Are SDs significantly different (P < 0.05)?										Are SDs significantly different (P < 0.05)?										Are SDs significantly different (P < 0.05)?										Are SDs significantly different (P < 0.05)?										Are SDs significantly different (P < 0.05)?
	ANOVA table	SS	DF	MS	F (DFn, DFd)	P value					ANOVA table	SS	DF	MS	F (DFn, DFd)	P value					ANOVA table	SS	DF	MS	F (DFn, DFd)	P value					ANOVA table	SS	DF	MS	F (DFn, DFd)	P value					ANOVA table	SS	DF	MS	F (DFn, DFd)	P value
	Treatment (between columns)	12.24	2	6.121	F (2, 6) = 34.55	P=0.0005					Treatment (between columns)	10.1	2	5.05	F (2, 6) = 50.18	P=0.0002					Treatment (between columns)	37.17	2	18.59	F (2, 6) = 20.89	P=0.0020					Treatment (between columns)	11.95	2	5.974	F (2, 6) = 93.38	P<0.0001					Treatment (between columns)	2.971	2	1.485	F (2, 6) = 51.08	P=0.0002
	Residual (within columns)	1.063	6	0.1772							Residual (within columns)	0.6037	6	0.1006							Residual (within columns)	5.339	6	0.8899							Residual (within columns)	0.3839	6	0.06398							Residual (within columns)	0.1745	6	0.02908
	Total	13.3	8								Total	10.7	8								Total	42.51	8								Total	12.33	8								Total	3.145	8
	Data summary										Data summary										Data summary										Data summary										Data summary
	Number of treatments (columns)	3									Number of treatments (columns)	3									Number of treatments (columns)	3									Number of treatments (columns)	3									Number of treatments (columns)	3
	Number of values (total)	9									Number of values (total)	9									Number of values (total)	9									Number of values (total)	9									Number of values (total)	9
	Number of families	1									Number of families	1									Number of families	1									Number of families	1									Number of families	1
	Number of comparisons per family	2									Number of comparisons per family	2									Number of comparisons per family	2									Number of comparisons per family	2									Number of comparisons per family	2
	Alpha	0.05									Alpha	0.05									Alpha	0.05									Alpha	0.05									Alpha	0.05
	Dunnett's multiple comparisons test	Mean Diff.	95.00% CI of diff.	Below threshold?	Summary	Adjusted P Value	A-?				Dunnett's multiple comparisons test	Mean Diff.	95.00% CI of diff.	Below threshold?	Summary	Adjusted P Value	A-?				Dunnett's multiple comparisons test	Mean Diff.	95.00% CI of diff.	Below threshold?	Summary	Adjusted P Value	A-?				Dunnett's multiple comparisons test	Mean Diff.	95.00% CI of diff.	Below threshold?	Summary	Adjusted P Value	A-?				Dunnett's multiple comparisons test	Mean Diff.	95.00% CI of diff.	Below threshold?	Summary	Adjusted P Value	A-?
	BSA vs. JAG1-Asp8x	-0.4833	-1.467 to 0.5007	No	ns	0.3355	B	JAG1-Asp8x			BSA vs. JAG1-Asp8x	-0.3633	-1.105 to 0.3782	No	ns	0.3369	B	JAG1-Asp8x			BSA vs. JAG1-Asp8x	-1.637	-3.842 to 0.5686	No	ns	0.1317	B	JAG1-Asp8x			BSA vs. JAG1-Asp8x	-0.9167	-1.508 to -0.3254	Yes	**	0.0078	B	JAG1-Asp8x			BSA vs. JAG1-Asp8x	-0.1833	-0.5820 to 0.2153	No	ns	0.3743	B	JAG1-Asp8x
	BSA vs. JAG1-JV1	-2.68	-3.664 to -1.696	Yes	***	0.0004	C	JAG1-JV1			BSA vs. JAG1-JV1	-2.407	-3.148 to -1.665	Yes	***	0.0002	C	JAG1-JV1			BSA vs. JAG1-JV1	-4.89	-7.095 to -2.685	Yes	**	0.0013	C	JAG1-JV1			BSA vs. JAG1-JV1	-2.77	-3.361 to -2.179	Yes	****	<0.0001	C	JAG1-JV1			BSA vs. JAG1-JV1	-1.3	-1.699 to -0.9014	Yes	***	0.0002	C	JAG1-JV1
	Test details	Mean 1	Mean 2	Mean Diff.	SE of diff.	n1	n2	q	DF		Test details	Mean 1	Mean 2	Mean Diff.	SE of diff.	n1	n2	q	DF		Test details	Mean 1	Mean 2	Mean Diff.	SE of diff.	n1	n2	q	DF		Test details	Mean 1	Mean 2	Mean Diff.	SE of diff.	n1	n2	q	DF		Test details	Mean 1	Mean 2	Mean Diff.	SE of diff.	n1	n2	q	DF
	BSA vs. JAG1-Asp8x	1	1.483	-0.4833	0.3437	3	3	1.406	6		BSA vs. JAG1-Asp8x	1	1.363	-0.3633	0.259	3	3	1.403	6		BSA vs. JAG1-Asp8x	1	2.637	-1.637	0.7702	3	3	2.125	6		BSA vs. JAG1-Asp8x	1	1.917	-0.9167	0.2065	3	3	4.439	6		BSA vs. JAG1-Asp8x	1	1.183	-0.1833	0.1392	3	3	1.317	6
	BSA vs. JAG1-JV1	1	3.68	-2.68	0.3437	3	3	7.798	6		BSA vs. JAG1-JV1	1	3.407	-2.407	0.259	3	3	9.292	6		BSA vs. JAG1-JV1	1	5.89	-4.89	0.7702	3	3	6.349	6		BSA vs. JAG1-JV1	1	3.77	-2.77	0.2065	3	3	13.41	6		BSA vs. JAG1-JV1	1	2.3	-1.3	0.1392	3	3	9.337	6
