# Supplementary material for: Induction of osteogenesis by bone-targeted Notch activation
Source: eLife. 2022 Feb 4;11:e60183. doi: 10.7554/eLife.60183 (PMC8880996; doi:10.7554/eLife.60183)
Supplement: Figure 5—source data 1. [file elife-60183-fig5-data1.xlsx]

## Sheet: Sheet1
Figure 5-source data 1
	μCT-BV/TV (%) Jag(Jv)					Trabecular thickness (mm) Jag(Jv)						Connectivity Density (1/mm^3) Jag(Jv1)						Trabecular number (mm-1) Jag(JV1)						Trabecular separation (mm) Jag(Jv)
		Ctrl	Jag1(Jv1)				Ctrl	Jag1(Jv)					Ctrl	Jag1(Jv1)					Ctrl	Jag1(Jv1)					Ctrl	Jag1(Jv1)
		0.11	0.122				0.036	0.041					209.783	239.671					4.711	4.566					0.205	0.208
		0.123	0.136				0.04	0.046					204.255	231.058					4.773	4.487					0.199	0.212
		0.116	0.143				0.039	0.043					196.207	192.816					4.649	4.682					0.205	0.204
		0.127	0.224				0.039	0.053					233.664	321.58					4.536	5.237					0.211	0.184
		0.131	0.126				0.042	0.043					237.011	194.911					4.397	4.604					0.221	0.205
	Table Analyzed	μCT-BV/TV Jag(Jv)				Table Analyzed	Trabecular thickness (mm) Jag(Jv1)					Table Analyzed	Connectivity Density (1/mm^3) Jag(Jv1)					Table Analyzed	Trabecular number (mm-1) Jag(JV1)					Table Analyzed	Trabecular separation (mm) Jag(Jv1)
	Column B	Jag1(Jv1				Column B	Jag1(Jv1)					Column B	Jag1(Jv1)					Column B	Jag1(Jv1					Column B	Jag1(Jv1)
	vs.	vs.				vs.	vs.					vs.	vs.					vs.	vs.					vs.	vs.
	Column A	Ctrl				Column A	Ctrl					Column A	Ctrl					Column A	Ctrl					Column A	Ctrl
	Unpaired t test with Welch's correction					Unpaired t test with Welch's correction						Unpaired t test with Welch's correction						Unpaired t test with Welch's correction						Unpaired t test with Welch's correction
	P value	0.2026				P value	0.0439					P value	0.4596					P value	0.5221					P value	0.3883
	P value summary	ns				P value summary	*					P value summary	ns					P value summary	ns					P value summary	ns
	Significantly different (P < 0.05)?	No				Significantly different (P < 0.05)?	Yes					Significantly different (P < 0.05)?	No					Significantly different (P < 0.05)?	No					Significantly different (P < 0.05)?	No
	One- or two-tailed P value?	Two-tailed				One- or two-tailed P value?	Two-tailed					One- or two-tailed P value?	Two-tailed					One- or two-tailed P value?	Two-tailed					One- or two-tailed P value?	Two-tailed
	Welch-corrected t, df	t=1.501, df=4.322				Welch-corrected t, df	t=2.587, df=5.621					Welch-corrected t, df	t=0.8014, df=4.955					Welch-corrected t, df	t=0.6806, df=5.865					Welch-corrected t, df	t=0.9157, df=7.494
	How big is the difference?					How big is the difference?						How big is the difference?						How big is the difference?						How big is the difference?
	Mean of column A	0.1214				Mean of column A	0.0392					Mean of column A	216.2					Mean of column A	4.613					Mean of column A	0.2082
	Mean of column B	0.1502				Mean of column B	0.0452					Mean of column B	236					Mean of column B	4.715					Mean of column B	0.2026
	Difference between means (B - A) ± SEM	0.02880 ± 0.01919				Difference between means (B - A) ± SEM	0.006000 ± 0.002319					Difference between means (B - A) ± SEM	19.82 ± 24.74					Difference between means (B - A) ± SEM	0.1020 ± 0.1499					Difference between means (B - A) ± SEM	-0.005600 ± 0.006116
	95% confidence interval	-0.02295 to 0.08055				95% confidence interval	0.0002304 to 0.01177					95% confidence interval	-43.94 to 83.58					95% confidence interval	-0.2668 to 0.4708					95% confidence interval	-0.01987 to 0.008670
	R squared (eta squared)	0.3426				R squared (eta squared)	0.5435					R squared (eta squared)	0.1148					R squared (eta squared)	0.0732					R squared (eta squared)	0.1006
	F test to compare variances					F test to compare variances						F test to compare variances						F test to compare variances						F test to compare variances
	F, DFn, Dfd	24.83, 4, 4				F, DFn, Dfd	4.723, 4, 4					F, DFn, Dfd	8.258, 4, 4					F, DFn, Dfd	4.042, 4, 4					F, DFn, Dfd	1.702, 4, 4
	P value	0.0088				P value	0.1618					P value	0.065					P value	0.2048					P value	0.6189
	P value summary	**				P value summary	ns					P value summary	ns					P value summary	ns					P value summary	ns
	Significantly different (P < 0.05)?	Yes				Significantly different (P < 0.05)?	No					Significantly different (P < 0.05)?	No					Significantly different (P < 0.05)?	No					Significantly different (P < 0.05)?	No
	Model comparison	SS	DF	Probability it is correct		Model comparison	SS	DF	Probability it is correct			Model comparison	SS	DF	Probability it is correct			Model comparison	SS	DF	Probability it is correct			Model comparison	SS	DF	Probability it is correct
	Null H. Population means identical	0.00944	9	71.15%		Null H. Population means identical	0.0001976	9	28.98%			Null H. Population means identical	13219	9	85.28%			Null H. Population means identical	0.4752	9	86.55%			Null H. Population means identical	0.0008264	9	83.81%
	Alternative H: Distinct population means	0.007366	8	28.85%		Alternative H: Distinct population means	0.0001076	8	71.02%			Alternative H: Distinct population means	12237	8	14.72%			Alternative H: Distinct population means	0.4492	8	13.45%			Alternative H: Distinct population means	0.000748	8	16.19%
	Ratio of probabilities			2.466		Ratio of probabilities			2.45			Ratio of probabilities			5.794			Ratio of probabilities			6.433			Ratio of probabilities			5.178
	Difference in AICc			-1.805		Difference in AICc			1.793			Difference in AICc			-3.513			Difference in AICc			-3.723			Difference in AICc			-3.289
	Data analyzed					Data analyzed						Data analyzed						Data analyzed						Data analyzed
	Sample size, column A	5				Sample size, column A	5					Sample size, column A	5					Sample size, column A	5					Sample size, column A	5
	Sample size, column B	5				Sample size, column B	5					Sample size, column B	5					Sample size, column B	5					Sample size, column B	5
