# Supplementary material for: Induction of osteogenesis by bone-targeted Notch activation
Source: eLife. 2022 Feb 4;11:e60183. doi: 10.7554/eLife.60183 (PMC8880996; doi:10.7554/eLife.60183)
Supplement: Figure 6—figure supplement 1—source data 1. [file elife-60183-fig6-figsupp1-data1.xlsx]

## Sheet: Sheet1
Figure 6-figure supplement 1-source data 1
A	Col1a area control male female			B	Col1a area treated male female
		M_ctrl	F_ctrl			M_Dll4(E12)	F_Dll4(E12)
		8.75902	8.1849			19.7447	12.855
		12.8308	6.78321			20.2696	9.45001
		15.7706	9.45238			14.0082	13.9793
		9.1555	9.02311			14.1305	8.74285
		12.1492	7.65935			14.4792	9.71715
						12.9584	9.05463
	Table Analyzed	Col1a area control male female				12.1022
	Column B	F_ctrl			Table Analyzed	Col1a area treated male female
	vs.	vs.
	Column A	M_ctrl			Column B	F_Dll4(E12)
					vs.	vs.
	Unpaired t test				Column A	M_Dll4(E12)
	P value	0.0338
	P value summary	*			Unpaired t test
	Significantly different (P < 0.05)?	Yes			P value	0.0118
	One- or two-tailed P value?	Two-tailed			P value summary	*
	t, df	t=2.558, df=8			Significantly different (P < 0.05)?	Yes
					One- or two-tailed P value?	Two-tailed
	How big is the difference?				t, df	t=3.015, df=11
	Mean of column A	11.73
	Mean of column B	8.221			How big is the difference?
	Difference between means (B - A) ± SEM	-3.512 ± 1.373			Mean of column A	15.38
	95% confidence interval	-6.679 to -0.3459			Mean of column B	10.63
	R squared (eta squared)	0.4499			Difference between means (B - A) ± SEM	-4.752 ± 1.576
					95% confidence interval	-8.220 to -1.283
	F test to compare variances				R squared (eta squared)	0.4525
	F, DFn, Dfd	7.300, 4, 4
	P value	0.0801			F test to compare variances
	P value summary	ns			F, DFn, Dfd	2.176, 6, 5
	Significantly different (P < 0.05)?	No			P value	0.4111
					P value summary	ns
	Data analyzed				Significantly different (P < 0.05)?	No
	Sample size, column A	5
	Sample size, column B	5			Data analyzed
					Sample size, column A	7
													Sample size, column B	6
C	Dll4 area control male female			D	Dll4 area treated male female
		M_ctrl	F_ctrl			M_Dll4(E12)	F_Dll4(E12)
		0.0450649	0.0413407			0.521486	0.270834
		0.102831	0.0295607			1.7392	0.283642
		0.101311	0.00380275			0.825818	0.384787
		0.150874	0.0569247			0.908518	0.101861
		0.0929993	0.0465712			0.338724	0.257614
						0.785247	0.172649
	Table Analyzed	Dll4 area control male female				0.91911
	Column B	F_ctrl			Table Analyzed	Dll4 area treated male female
	vs.	vs.
	Column A	M_ctrl			Column B	F_Dll4(E12)
					vs.	vs.
	Unpaired t test				Column A	M_Dll4(E12)
	P value	0.011
	P value summary	*			Unpaired t test with Welch's correction
	Significantly different (P < 0.05)?	Yes			P value	0.0095
	One- or two-tailed P value?	Two-tailed			P value summary	**
	t, df	t=3.294, df=8			Significantly different (P < 0.05)?	Yes
					One- or two-tailed P value?	Two-tailed
	How big is the difference?				Welch-corrected t, df	t=3.595, df=6.676
	Mean of column A	0.09862
	Mean of column B	0.03564			How big is the difference?
	Difference between means (B - A) ± SEM	-0.06298 ± 0.01912			Mean of column A	0.8626
	95% confidence interval	-0.1071 to -0.01889			Mean of column B	0.2452
	R squared (eta squared)	0.5756			Difference between means (B - A) ± SEM	-0.6174 ± 0.1717
					95% confidence interval	-1.027 to -0.2073
	F test to compare variances				R squared (eta squared)	0.6594
	F, DFn, Dfd	3.416, 4, 4
	P value	0.2612			F test to compare variances
	P value summary	ns			F, DFn, Dfd	20.52, 6, 5
	Significantly different (P < 0.05)?	No			P value	0.0045
					P value summary	**
	Data analyzed				Significantly different (P < 0.05)?	Yes
	Sample size, column A	5
	Sample size, column B	5			Data analyzed
					Sample size, column A	7
					Sample size, column B	6
