# Supplementary material for: Induction of osteogenesis by bone-targeted Notch activation
Source: eLife. 2022 Feb 4;11:e60183. doi: 10.7554/eLife.60183 (PMC8880996; doi:10.7554/eLife.60183)
Supplement: Figure 6—source data 1. [file elife-60183-fig6-data1.xlsx]

## Sheet: Sheet1
Figure 6-source data 1
C	BV/TV		Ctrl					Dll4(E12)					C	Conn-Dens.		Ctrl					Dll4(E12)					C	DT-Tb.Th* (mm)		Ctrl					Dll4(E12)
		Sham	0.07	0.076	0.062	0.06	0.062	0.073	0.077	0.068	0.048	0.075			Sham	267.264	112.094	216.124	128.502	306.961	113.246	213.541	138.722	149.651	130.382			Sham	0.035	0.04	0.036	0.035	0.035	0.039	0.035	0.033	0.035	0.036
		OVX	0.054	0.038	0.03	0.041	0.043	0.047	0.052	0.054	0.037	0.055			OVX	89.876	53.577	40.084	94.391	73.967	125.903	138.809	146.87	74.954	108.629			OVX	0.036	0.036	0.038	0.034	0.033	0.034	0.038	0.037	0.037	0.033
	Table Analyzed	BV/TV												Table Analyzed	Conn-Dens.												Table Analyzed	DT-Tb.Th*
	Two-way ANOVA	Ordinary												Two-way ANOVA	Ordinary												Two-way ANOVA	Ordinary
	Alpha	0.05												Alpha	0.05												Alpha	0.05
	Source of Variation	% of total variation	P value	P value summary	Significant?									Source of Variation	% of total variation	P value	P value summary	Significant?									Source of Variation	% of total variation	P value	P value summary	Significant?
	Interaction	1.02	0.4906	ns	No									Interaction	15.76	0.0314	*	Yes									Interaction	1.695	0.6054	ns	No
	Surgery	62.96	<0.0001	****	Yes									Surgery	38.8	0.0019	**	Yes									Surgery	0.6102	0.7559	ns	No
	Treatment	3.252	0.2257	ns	No									Treatment	0.1001	0.8533	ns	No									Treatment	0.0678	0.9174	ns	No
	ANOVA table	SS	DF	MS	F (DFn, DFd)	P value								ANOVA table	SS	DF	MS	F (DFn, DFd)	P value								ANOVA table	SS	DF	MS	F (DFn, DFd)	P value
	Interaction	3.92e-05	1	3.92e-05	F (1, 16) = 0.4979	P=0.4906								Interaction	13975	1	13975	F (1, 16) = 5.562	P=0.0314								Interaction	1.25e-06	1	1.25e-06	F (1, 16) = 0.2778	P=0.6054
	Surgery	0.00242	1	0.00242	F (1, 16) = 30.74	P<0.0001								Surgery	34397	1	34397	F (1, 16) = 13.69	P=0.0019								Surgery	4.5e-07	1	4.5e-07	F (1, 16) = 0.1000	P=0.7559
	Treatment	0.000125	1	0.000125	F (1, 16) = 1.588	P=0.2257								Treatment	88.76	1	88.76	F (1, 16) = 0.03532	P=0.8533								Treatment	5e-08	1	5e-08	F (1, 16) = 0.01111	P=0.9174
	Residual	0.00126	16	7.873e-05										Residual	40204	16	2513										Residual	7.2e-05	16	4.5e-06
	Difference between column means													Difference between column means													Difference between column means
	Mean of Ctrl	0.0536												Mean of Ctrl	138.3												Mean of Ctrl	0.0358
	Mean of Dll4(E12)	0.0586												Mean of Dll4(E12)	134.1												Mean of Dll4(E12)	0.0357
	Difference between means	-0.005												Difference between means	4.213												Difference between means	0.0001
	SE of difference	0.003968												SE of difference	22.42												SE of difference	0.0009487
	95% CI of difference	-0.01341 to 0.003412												95% CI of difference	-43.31 to 51.74												95% CI of difference	-0.001911 to 0.002111
	Difference between row means													Difference between row means													Difference between row means
	Mean of Sham	0.0671												Mean of Sham	177.6												Mean of Sham	0.0359
	Mean of OVX	0.0451												Mean of OVX	94.71												Mean of OVX	0.0356
	Difference between means	0.022												Difference between means	82.94												Difference between means	0.0003
	SE of difference	0.003968												SE of difference	22.42												SE of difference	0.0009487
	95% CI of difference	0.01359 to 0.03041												95% CI of difference	35.42 to 130.5												95% CI of difference	-0.001711 to 0.002311
	Interaction CI													Interaction CI													Interaction CI
	Mean diff, A1 - B1	-0.0022												Mean diff, A1 - B1	57.08												Mean diff, A1 - B1	0.0006
	Mean diff, A2 - B2	-0.0078												Mean diff, A2 - B2	-48.65												Mean diff, A2 - B2	-0.0004
	(A1 -B1) - (A2 - B2)	0.0056												(A1 -B1) - (A2 - B2)	105.7												(A1 -B1) - (A2 - B2)	0.001
	95% CI of difference	-0.01122 to 0.02242												95% CI of difference	10.69 to 200.8												95% CI of difference	-0.003022 to 0.005022
	(B1 - A1) - (B2 - A2)	-0.0056												(B1 - A1) - (B2 - A2)	-105.7												(B1 - A1) - (B2 - A2)	-0.001
	95% CI of difference	-0.02242 to 0.01122												95% CI of difference	-200.8 to -10.69												95% CI of difference	-0.005022 to 0.003022
	Data summary													Data summary													Data summary
	Number of columns (Treatment)	2												Number of columns (Treatment)	2												Number of columns (Treatment)	2
	Number of rows (Surgery)	2												Number of rows (Surgery)	2												Number of rows (Surgery)	2
	Number of values	20												Number of values	20												Number of values	20
	Compare cell means regardless of rows and columns													Compare cell means regardless of rows and columns													Compare cell means regardless of rows and columns
	Number of families	1												Number of families	1												Number of families	1
	Number of comparisons per family	6												Number of comparisons per family	6												Number of comparisons per family	6
	Alpha	0.05												Alpha	0.05												Alpha	0.05
	Tukey's multiple comparisons test	Mean Diff.	95.00% CI of diff.	Significant?	Summary	Adjusted P Value								Tukey's multiple comparisons test	Mean Diff.	95.00% CI of diff.	Significant?	Summary	Adjusted P Value								Tukey's multiple comparisons test	Mean Diff.	95.00% CI of diff.	Significant?	Summary	Adjusted P Value
	Sham:Ctrl vs. Sham:Dll4(E12)	-0.0022	-0.01825 to 0.01385	No	ns	0.9788								Sham:Ctrl vs. Sham:Dll4(E12)	57.08	-33.62 to 147.8	No	ns	0.3089								Sham:Ctrl vs. Sham:Dll4(E12)	0.0006	-0.003238 to 0.004438	No	ns	0.9692
	Sham:Ctrl vs. OVX:Ctrl	0.0248	0.008745 to 0.04085	Yes	**	0.0022								Sham:Ctrl vs. OVX:Ctrl	135.8	45.11 to 226.5	Yes	**	0.0029								Sham:Ctrl vs. OVX:Ctrl	0.0008	-0.003038 to 0.004638	No	ns	0.9317
	Sham:Ctrl vs. OVX:Dll4(E12)	0.017	0.0009451 to 0.03305	Yes	*	0.0361								Sham:Ctrl vs. OVX:Dll4(E12)	87.16	-3.547 to 177.9	No	ns	0.0619								Sham:Ctrl vs. OVX:Dll4(E12)	0.0004	-0.003438 to 0.004238	No	ns	0.9904
	Sham:Dll4(E12) vs. OVX:Ctrl	0.027	0.01095 to 0.04305	Yes	***	0.001								Sham:Dll4(E12) vs. OVX:Ctrl	78.73	-11.97 to 169.4	No	ns	0.101								Sham:Dll4(E12) vs. OVX:Ctrl	0.0002	-0.003638 to 0.004038	No	ns	0.9988
	Sham:Dll4(E12) vs. OVX:Dll4(E12)	0.0192	0.003145 to 0.03525	Yes	*	0.0166								Sham:Dll4(E12) vs. OVX:Dll4(E12)	30.08	-60.63 to 120.8	No	ns	0.7795								Sham:Dll4(E12) vs. OVX:Dll4(E12)	-0.0002	-0.004038 to 0.003638	No	ns	0.9988
	OVX:Ctrl vs. OVX:Dll4(E12)	-0.0078	-0.02385 to 0.008255	No	ns	0.523								OVX:Ctrl vs. OVX:Dll4(E12)	-48.65	-139.4 to 42.05	No	ns	0.4412								OVX:Ctrl vs. OVX:Dll4(E12)	-0.0004	-0.004238 to 0.003438	No	ns	0.9904
	Test details	Mean 1	Mean 2	Mean Diff.	SE of diff.	N1	N2	q	DF					Test details	Mean 1	Mean 2	Mean Diff.	SE of diff.	N1	N2	q	DF					Test details	Mean 1	Mean 2	Mean Diff.	SE of diff.	N1	N2	q	DF
	Sham:Ctrl vs. Sham:Dll4(E12)	0.066	0.0682	-0.0022	0.005612	5	5	0.5544	16					Sham:Ctrl vs. Sham:Dll4(E12)	206.2	149.1	57.08	31.7	5	5	2.546	16					Sham:Ctrl vs. Sham:Dll4(E12)	0.0362	0.0356	0.0006	0.001342	5	5	0.6325	16
	Sham:Ctrl vs. OVX:Ctrl	0.066	0.0412	0.0248	0.005612	5	5	6.25	16					Sham:Ctrl vs. OVX:Ctrl	206.2	70.38	135.8	31.7	5	5	6.058	16					Sham:Ctrl vs. OVX:Ctrl	0.0362	0.0354	0.0008	0.001342	5	5	0.8433	16
	Sham:Ctrl vs. OVX:Dll4(E12)	0.066	0.049	0.017	0.005612	5	5	4.284	16					Sham:Ctrl vs. OVX:Dll4(E12)	206.2	119	87.16	31.7	5	5	3.888	16					Sham:Ctrl vs. OVX:Dll4(E12)	0.0362	0.0358	0.0004	0.001342	5	5	0.4216	16
	Sham:Dll4(E12) vs. OVX:Ctrl	0.0682	0.0412	0.027	0.005612	5	5	6.804	16					Sham:Dll4(E12) vs. OVX:Ctrl	149.1	70.38	78.73	31.7	5	5	3.512	16					Sham:Dll4(E12) vs. OVX:Ctrl	0.0356	0.0354	0.0002	0.001342	5	5	0.2108	16
	Sham:Dll4(E12) vs. OVX:Dll4(E12)	0.0682	0.049	0.0192	0.005612	5	5	4.839	16					Sham:Dll4(E12) vs. OVX:Dll4(E12)	149.1	119	30.08	31.7	5	5	1.342	16					Sham:Dll4(E12) vs. OVX:Dll4(E12)	0.0356	0.0358	-0.0002	0.001342	5	5	0.2108	16
	OVX:Ctrl vs. OVX:Dll4(E12)	0.0412	0.049	-0.0078	0.005612	5	5	1.966	16					OVX:Ctrl vs. OVX:Dll4(E12)	70.38	119	-48.65	31.7	5	5	2.17	16					OVX:Ctrl vs. OVX:Dll4(E12)	0.0354	0.0358	-0.0004	0.001342	5	5	0.4216	16
C	Trabecular separation (mm)		Ctrl					Dll4(E12)					C	Bone surface area (mm^2)		Ctrl					Dll4(E12)					C	Trabecular number (mm^-1)		Ctrl					Dll4(E12)
		Sham	0.305	0.315	0.359	0.292	0.365	0.341	0.306	0.282	0.328	0.277			Sham	18.365	19.716	17.221	16.807	16.879	16.593	20.69	21.708	16.436	19.868			Sham	3.309	3.184	2.804	3.399	2.801	2.999	3.222	3.538	3.06	3.583
		OVX	0.339	0.396	0.439	0.384	0.389	0.43	0.399	0.349	0.391	0.34			OVX	16.233	8.873	8.935	12.099	12.752	12	13.433	16.083	11.028	17.422			OVX	2.942	2.51	2.293	2.601	2.59	2.367	2.546	2.853	2.508	2.919
	Table Analyzed	DT-Tb.Sp*												Table Analyzed	Bone surface area												Table Analyzed	DT-Tb.N*
	Two-way ANOVA	Ordinary												Two-way ANOVA	Ordinary												Two-way ANOVA	Ordinary
	Alpha	0.05												Alpha	0.05												Alpha	0.05
	Source of Variation	% of total variation	P value	P value summary	Significant?									Source of Variation	% of total variation	P value	P value summary	Significant?									Source of Variation	% of total variation	P value	P value summary	Significant?
	Interaction	0.479	0.6757	ns	No									Interaction	0.4273	0.6694	ns	No									Interaction	0.7493	0.5793	ns	No
	Surgery	55.03	0.0003	***	Yes									Surgery	57.76	0.0001	***	Yes									Surgery	59.41	0.0001	***	Yes
	Treatment	2.292	0.3651	ns	No									Treatment	5.68	0.1323	ns	No									Treatment	2.409	0.3253	ns	No
	ANOVA table	SS	DF	MS	F (DFn, DFd)	P value								ANOVA table	SS	DF	MS	F (DFn, DFd)	P value								ANOVA table	SS	DF	MS	F (DFn, DFd)	P value
	Interaction	0.0002048	1	0.0002048	F (1, 16) = 0.1816	P=0.6757								Interaction	1.136	1	1.136	F (1, 16) = 0.1892	P=0.6694								Interaction	0.021	1	0.021	F (1, 16) = 0.3203	P=0.5793
	Surgery	0.02353	1	0.02353	F (1, 16) = 20.86	P=0.0003								Surgery	153.6	1	153.6	F (1, 16) = 25.58	P=0.0001								Surgery	1.665	1	1.665	F (1, 16) = 25.39	P=0.0001
	Treatment	0.00098	1	0.00098	F (1, 16) = 0.8690	P=0.3651								Treatment	15.1	1	15.1	F (1, 16) = 2.515	P=0.1323								Treatment	0.06751	1	0.06751	F (1, 16) = 1.030	P=0.3253
	Residual	0.01804	16	0.001128										Residual	96.08	16	6.005										Residual	1.049	16	0.06555
	Difference between column means													Difference between column means													Difference between column means
	Mean of Ctrl	0.3583												Mean of Ctrl	14.79												Mean of Ctrl	2.843
	Mean of Dll4(E12)	0.3443												Mean of Dll4(E12)	16.53												Mean of Dll4(E12)	2.96
	Difference between means	0.014												Difference between means	-1.738												Difference between means	-0.1162
	SE of difference	0.01502												SE of difference	1.096												SE of difference	0.1145
	95% CI of difference	-0.01784 to 0.04584												95% CI of difference	-4.061 to 0.5851												95% CI of difference	-0.3589 to 0.1265
	Difference between row means													Difference between row means													Difference between row means
	Mean of Sham	0.317												Mean of Sham	18.43												Mean of Sham	3.19
	Mean of OVX	0.3856												Mean of OVX	12.89												Mean of OVX	2.613
	Difference between means	-0.0686												Difference between means	5.543												Difference between means	0.577
	SE of difference	0.01502												SE of difference	1.096												SE of difference	0.1145
	95% CI of difference	-0.1004 to -0.03676												95% CI of difference	3.219 to 7.866												95% CI of difference	0.3343 to 0.8197
	Interaction CI													Interaction CI													Interaction CI
	Mean diff, A1 - B1	0.0204												Mean diff, A1 - B1	-1.261												Mean diff, A1 - B1	-0.181
	Mean diff, A2 - B2	0.0076												Mean diff, A2 - B2	-2.215												Mean diff, A2 - B2	-0.0514
	(A1 -B1) - (A2 - B2)	0.0128												(A1 -B1) - (A2 - B2)	0.9534												(A1 -B1) - (A2 - B2)	-0.1296
	95% CI of difference	-0.05087 to 0.07647												95% CI of difference	-3.693 to 5.600												95% CI of difference	-0.6151 to 0.3559
	(B1 - A1) - (B2 - A2)	-0.0128												(B1 - A1) - (B2 - A2)	-0.9534												(B1 - A1) - (B2 - A2)	0.1296
	95% CI of difference	-0.07647 to 0.05087												95% CI of difference	-5.600 to 3.693												95% CI of difference	-0.3559 to 0.6151
	Data summary													Data summary													Data summary
	Number of columns (Treatment)	2												Number of columns (Treatment)	2												Number of columns (Treatment)	2
	Number of rows (Surgery)	2												Number of rows (Surgery)	2												Number of rows (Surgery)	2
	Number of values	20												Number of values	20												Number of values	20
	Compare cell means regardless of rows and columns													Compare cell means regardless of rows and columns													Compare cell means regardless of rows and columns
	Number of families	1												Number of families	1												Number of families	1
	Number of comparisons per family	6												Number of comparisons per family	6												Number of comparisons per family	6
	Alpha	0.05												Alpha	0.05												Alpha	0.05
	Tukey's multiple comparisons test	Mean Diff.	95.00% CI of diff.	Significant?	Summary	Adjusted P Value								Tukey's multiple comparisons test	Mean Diff.	95.00% CI of diff.	Significant?	Summary	Adjusted P Value								Tukey's multiple comparisons test	Mean Diff.	95.00% CI of diff.	Significant?	Summary	Adjusted P Value
	Sham:Ctrl vs. Sham:Dll4(E12)	0.0204	-0.04036 to 0.08116	No	ns	0.7732								Sham:Ctrl vs. Sham:Dll4(E12)	-1.261	-5.695 to 3.173	No	ns	0.847								Sham:Ctrl vs. Sham:Dll4(E12)	-0.181	-0.6443 to 0.2823	No	ns	0.6842
	Sham:Ctrl vs. OVX:Ctrl	-0.0622	-0.1230 to -0.001435	Yes	*	0.0439								Sham:Ctrl vs. OVX:Ctrl	6.019	1.585 to 10.45	Yes	**	0.0065								Sham:Ctrl vs. OVX:Ctrl	0.5122	0.04892 to 0.9755	Yes	*	0.0277
	Sham:Ctrl vs. OVX:Dll4(E12)	-0.0546	-0.1154 to 0.006165	No	ns	0.0862								Sham:Ctrl vs. OVX:Dll4(E12)	3.804	-0.6296 to 8.238	No	ns	0.1064								Sham:Ctrl vs. OVX:Dll4(E12)	0.4608	-0.002481 to 0.9241	No	ns	0.0515
	Sham:Dll4(E12) vs. OVX:Ctrl	-0.0826	-0.1434 to -0.02184	Yes	**	0.0064								Sham:Dll4(E12) vs. OVX:Ctrl	7.281	2.847 to 11.71	Yes	**	0.0012								Sham:Dll4(E12) vs. OVX:Ctrl	0.6932	0.2299 to 1.156	Yes	**	0.0029
	Sham:Dll4(E12) vs. OVX:Dll4(E12)	-0.075	-0.1358 to -0.01424	Yes	*	0.0133								Sham:Dll4(E12) vs. OVX:Dll4(E12)	5.066	0.6318 to 9.500	Yes	*	0.0225								Sham:Dll4(E12) vs. OVX:Dll4(E12)	0.6418	0.1785 to 1.105	Yes	**	0.0055
	OVX:Ctrl vs. OVX:Dll4(E12)	0.0076	-0.05316 to 0.06836	No	ns	0.9837								OVX:Ctrl vs. OVX:Dll4(E12)	-2.215	-6.649 to 2.219	No	ns	0.5004								OVX:Ctrl vs. OVX:Dll4(E12)	-0.0514	-0.5147 to 0.4119	No	ns	0.9885
	Test details	Mean 1	Mean 2	Mean Diff.	SE of diff.	N1	N2	q	DF					Test details	Mean 1	Mean 2	Mean Diff.	SE of diff.	N1	N2	q	DF					Test details	Mean 1	Mean 2	Mean Diff.	SE of diff.	N1	N2	q	DF
	Sham:Ctrl vs. Sham:Dll4(E12)	0.3272	0.3068	0.0204	0.02124	5	5	1.358	16					Sham:Ctrl vs. Sham:Dll4(E12)	17.8	19.06	-1.261	1.55	5	5	1.151	16					Sham:Ctrl vs. Sham:Dll4(E12)	3.099	3.28	-0.181	0.1619	5	5	1.581	16
	Sham:Ctrl vs. OVX:Ctrl	0.3272	0.3894	-0.0622	0.02124	5	5	4.142	16					Sham:Ctrl vs. OVX:Ctrl	17.8	11.78	6.019	1.55	5	5	5.493	16					Sham:Ctrl vs. OVX:Ctrl	3.099	2.587	0.5122	0.1619	5	5	4.473	16
	Sham:Ctrl vs. OVX:Dll4(E12)	0.3272	0.3818	-0.0546	0.02124	5	5	3.636	16					Sham:Ctrl vs. OVX:Dll4(E12)	17.8	13.99	3.804	1.55	5	5	3.472	16					Sham:Ctrl vs. OVX:Dll4(E12)	3.099	2.639	0.4608	0.1619	5	5	4.024	16
	Sham:Dll4(E12) vs. OVX:Ctrl	0.3068	0.3894	-0.0826	0.02124	5	5	5.5	16					Sham:Dll4(E12) vs. OVX:Ctrl	19.06	11.78	7.281	1.55	5	5	6.644	16					Sham:Dll4(E12) vs. OVX:Ctrl	3.28	2.587	0.6932	0.1619	5	5	6.054	16
	Sham:Dll4(E12) vs. OVX:Dll4(E12)	0.3068	0.3818	-0.075	0.02124	5	5	4.994	16					Sham:Dll4(E12) vs. OVX:Dll4(E12)	19.06	13.99	5.066	1.55	5	5	4.623	16					Sham:Dll4(E12) vs. OVX:Dll4(E12)	3.28	2.639	0.6418	0.1619	5	5	5.605	16
	OVX:Ctrl vs. OVX:Dll4(E12)	0.3894	0.3818	0.0076	0.02124	5	5	0.5061	16					OVX:Ctrl vs. OVX:Dll4(E12)	11.78	13.99	-2.215	1.55	5	5	2.021	16					OVX:Ctrl vs. OVX:Dll4(E12)	2.587	2.639	-0.0514	0.1619	5	5	0.4489	16
D	Cortical thickness( mm)		Ctrl					Dll4(E12)					D	Cortical consistency (%)		Ctrl					Dll4(E12)					E	Col1a area OVX Dll4(E12) treated vs control OVX	OVX	OVX+Dll4(E12)	F	Pdgfrb area OVX Dll4(E12) treated vs control OVX	OVX	OVX+Dll4(E12)
		Sham	0.183	0.191	0.192	0.187	0.187	0.178	0.187	0.176	0.183	0.17			Sham	99.35	99.51	99.92	99.9	99.83	99.88	99.82	99.82	99.9	99.78			10.7914	11.9538			13.9657	6.89056
		OVX	0.184	0.196	0.193	0.184	0.184	0.183	0.185	0.178	0.183	0.166			OVX	99.29	99.87	99.9	99.78	99.87	99.79	99.92	99.89	99.88	98.97			17.1638	17.6207			25.2823	29.2711
																												11.3604	8.13627			16.7681	12.0201
	Table Analyzed	DT-Tb.Th* midshaft												Table Analyzed	Cortical consistency (%)													18.0583	7.70125			11.0573	7.09859
																												8.17276	5.47443			20.4996	6.20561
	Two-way ANOVA	Ordinary												Two-way ANOVA	Ordinary
	Alpha	0.05												Alpha	0.05												Table Analyzed	Col1a OVX Dll4(E12) treated vs control OVX			Table Analyzed	Pdgfrb OVX Dll4(E12) treated vs control OVX
	Source of Variation	% of total variation	P value	P value summary	Significant?									Source of Variation	% of total variation	P value	P value summary	Significant?									Column B	OVX+Dll4(E12)			Column B	OVX+Dll4(E12)
	Interaction	3.773e-28	>0.9999	ns	No									Interaction	3.57	0.4482	ns	No									vs.	vs.			vs.	vs.
	Surgery	0.01959	0.9426	ns	No									Surgery	1.197	0.6587	ns	No									Column A	OVX			Column A	OVX
	Treatment	41.45	0.0039	**	Yes									Treatment	0.7315	0.7295	ns	No
																											Unpaired t test				Unpaired t test with Welch's correction
	ANOVA table	SS	DF	MS	F (DFn, DFd)	P value								ANOVA table	SS	DF	MS	F (DFn, DFd)	P value								P value	0.3368			P value	0.3373
	Interaction	3.852e-33	1	3.852e-33	F (1, 16) = 1.031e-028	P>0.9999								Interaction	0.04513	1	0.04513	F (1, 16) = 0.6045	P=0.4482								P value summary	ns			P value summary	ns
	Surgery	2e-07	1	2e-07	F (1, 16) = 0.005355	P=0.9426								Surgery	0.01512	1	0.01512	F (1, 16) = 0.2026	P=0.6587								Significantly different (P < 0.05)?	No			Significantly different (P < 0.05)?	No
	Treatment	0.0004232	1	0.0004232	F (1, 16) = 11.33	P=0.0039								Treatment	0.009245	1	0.009245	F (1, 16) = 0.1238	P=0.7295								One- or two-tailed P value?	Two-tailed			One- or two-tailed P value?	Two-tailed
	Residual	0.0005976	16	3.735e-05										Residual	1.194	16	0.07465										t, df	t=1.022, df=8			Welch-corrected t, df	t=1.038, df=6.353
	Difference between column means													Difference between column means													How big is the difference?				How big is the difference?
	Mean of Ctrl	0.1881												Mean of Ctrl	99.72												Mean of column A	13.11			Mean of column A	17.51
	Mean of Dll4(E12)	0.1789												Mean of Dll4(E12)	99.77												Mean of column B	10.18			Mean of column B	12.3
	Difference between means	0.0092												Difference between means	-0.043												Difference between means (B - A) ± SEM	-2.932 ± 2.870			Difference between means (B - A) ± SEM	-5.217 ± 5.028
	SE of difference	0.002733												SE of difference	0.1222												95% confidence interval	-9.550 to 3.686			95% confidence interval	-17.36 to 6.922
	95% CI of difference	0.003406 to 0.01499												95% CI of difference	-0.3020 to 0.2160												R squared (eta squared)	0.1154			R squared (eta squared)	0.1449
	Difference between row means													Difference between row means													F test to compare variances				F test to compare variances
	Mean of Sham	0.1834												Mean of Sham	99.77												F, DFn, Dfd	1.234, 4, 4			F, DFn, Dfd	3.075, 4, 4
	Mean of OVX	0.1836												Mean of OVX	99.72												P value	0.8436			P value	0.3023
	Difference between means	-0.0002												Difference between means	0.055												P value summary	ns			P value summary	ns
	SE of difference	0.002733												SE of difference	0.1222												Significantly different (P < 0.05)?	No			Significantly different (P < 0.05)?	No
	95% CI of difference	-0.005994 to 0.005594												95% CI of difference	-0.2040 to 0.3140
																											Data analyzed				Data analyzed
	Interaction CI													Interaction CI													Sample size, column A	5			Sample size, column A	5
	Mean diff, A1 - B1	0.0092												Mean diff, A1 - B1	-0.138												Sample size, column B	5			Sample size, column B	5
	Mean diff, A2 - B2	0.0092												Mean diff, A2 - B2	0.052
	(A1 -B1) - (A2 - B2)	0												(A1 -B1) - (A2 - B2)	-0.19
	95% CI of difference	-0.01159 to 0.01159												95% CI of difference	-0.7080 to 0.3280
	(B1 - A1) - (B2 - A2)	0												(B1 - A1) - (B2 - A2)	0.19
	95% CI of difference	-0.01159 to 0.01159												95% CI of difference	-0.3280 to 0.7080
	Data summary													Data summary
	Number of columns (Treatment)	2												Number of columns (Treatment)	2
	Number of rows (Surgery)	2												Number of rows (Surgery)	2
	Number of values	20												Number of values	20
	Compare cell means regardless of rows and columns													Compare cell means regardless of rows and columns
	Number of families	1												Number of families	1
	Number of comparisons per family	6												Number of comparisons per family	6
	Alpha	0.05												Alpha	0.05
	Tukey's multiple comparisons test	Mean Diff.	95.00% CI of diff.	Significant?	Summary	Adjusted P Value								Tukey's multiple comparisons test	Mean Diff.	95.00% CI of diff.	Below threshold?	Summary	Adjusted P Value
	Sham:Ctrl vs. Sham:Dll4(E12)	0.0092	-0.001858 to 0.02026	No	ns	0.1214								Sham:Ctrl vs. Sham:Dll4(E12)	-0.138	-0.6324 to 0.3564	No	ns	0.854
	Sham:Ctrl vs. OVX:Ctrl	-0.0002	-0.01126 to 0.01086	No	ns	>0.9999								Sham:Ctrl vs. OVX:Ctrl	-0.04	-0.5344 to 0.4544	No	ns	0.9954
	Sham:Ctrl vs. OVX:Dll4(E12)	0.009	-0.002058 to 0.02006	No	ns	0.1329								Sham:Ctrl vs. OVX:Dll4(E12)	0.012	-0.4824 to 0.5064	No	ns	0.9999
	Sham:Dll4(E12) vs. OVX:Ctrl	-0.0094	-0.02046 to 0.001658	No	ns	0.1108								Sham:Dll4(E12) vs. OVX:Ctrl	0.098	-0.3964 to 0.5924	No	ns	0.9404
	Sham:Dll4(E12) vs. OVX:Dll4(E12)	-0.0002	-0.01126 to 0.01086	No	ns	>0.9999								Sham:Dll4(E12) vs. OVX:Dll4(E12)	0.15	-0.3444 to 0.6444	No	ns	0.8211
	OVX:Ctrl vs. OVX:Dll4(E12)	0.0092	-0.001858 to 0.02026	No	ns	0.1214								OVX:Ctrl vs. OVX:Dll4(E12)	0.052	-0.4424 to 0.5464	No	ns	0.9902
	Test details	Mean 1	Mean 2	Mean Diff.	SE of diff.	N1	N2	q	DF					Test details	Mean 1	Mean 2	Mean Diff.	SE of diff.	N1	N2	q	DF
	Sham:Ctrl vs. Sham:Dll4(E12)	0.188	0.1788	0.0092	0.003865	5	5	3.366	16					Sham:Ctrl vs. Sham:Dll4(E12)	99.7	99.84	-0.138	0.1728	5	5	1.129	16
	Sham:Ctrl vs. OVX:Ctrl	0.188	0.1882	-0.0002	0.003865	5	5	0.07318	16					Sham:Ctrl vs. OVX:Ctrl	99.7	99.74	-0.04	0.1728	5	5	0.3274	16
	Sham:Ctrl vs. OVX:Dll4(E12)	0.188	0.179	0.009	0.003865	5	5	3.293	16					Sham:Ctrl vs. OVX:Dll4(E12)	99.7	99.69	0.012	0.1728	5	5	0.09821	16
	Sham:Dll4(E12) vs. OVX:Ctrl	0.1788	0.1882	-0.0094	0.003865	5	5	3.439	16					Sham:Dll4(E12) vs. OVX:Ctrl	99.84	99.74	0.098	0.1728	5	5	0.8021	16
	Sham:Dll4(E12) vs. OVX:Dll4(E12)	0.1788	0.179	-0.0002	0.003865	5	5	0.07318	16					Sham:Dll4(E12) vs. OVX:Dll4(E12)	99.84	99.69	0.15	0.1728	5	5	1.228	16
	OVX:Ctrl vs. OVX:Dll4(E12)	0.1882	0.179	0.0092	0.003865	5	5	3.366	16					OVX:Ctrl vs. OVX:Dll4(E12)	99.74	99.69	0.052	0.1728	5	5	0.4256	16
G	BV/TV Male Sham OVX	Male	Sham	OVX						G	Trabecular number Male Sham OVX	Male	Sham	OVX						G	Bone surface area Male Sham OVX	39.083	18.365	16.233
		0.092	0.07	0.054								4.529	3.309	2.942								33.448	19.716	8.873
		0.098	0.076	0.038								4.6	3.184	2.51								31.969	17.221	8.935
		0.08	0.062	0.03								4.3	2.804	2.293								25.481	16.807	12.099
		0.096	0.06	0.041								4.281	3.399	2.601								38.658	16.879	12.752
		0.151	0.062	0.043								5.364	2.801	2.59
																					Table Analyzed	Bone surface Male Sham OVX
	Table Analyzed	BV/TV Male Sham OVX									Table Analyzed	Trabecular number Male Sham OVX									Data sets analyzed	A-C
	Data sets analyzed	A-C									Data sets analyzed	A-C
																					ANOVA summary
	ANOVA summary										ANOVA summary										F	46.01
	F	16.74									F	50.72									P value	<0.0001
	P value	0.0003									P value	<0.0001									P value summary	****
	P value summary	***									P value summary	****									Significant diff. among means (P < 0.05)?	Yes
	Significant diff. among means (P < 0.05)?	Yes									Significant diff. among means (P < 0.05)?	Yes									R squared	0.8846
	R squared	0.7362									R squared	0.8942
																					Brown-Forsythe test
	Brown-Forsythe test										Brown-Forsythe test										F (DFn, DFd)	2.583 (2, 12)
	F (DFn, DFd)	0.8568 (2, 12)									F (DFn, DFd)	0.3824 (2, 12)									P value	0.1167
	P value	0.4489									P value	0.6903									P value summary	ns
	P value summary	ns									P value summary	ns									Are SDs significantly different (P < 0.05)?	No
	Are SDs significantly different (P < 0.05)?	No									Are SDs significantly different (P < 0.05)?	No
																					Bartlett's test
	Bartlett's test										Bartlett's test										Bartlett's statistic (corrected)	6.515
	Bartlett's statistic (corrected)	8.115									Bartlett's statistic (corrected)	1.599									P value	0.0385
	P value	0.0173									P value	0.4496									P value summary	*
	P value summary	*									P value summary	ns									Are SDs significantly different (P < 0.05)?	Yes
	Are SDs significantly different (P < 0.05)?	Yes									Are SDs significantly different (P < 0.05)?	No
																					ANOVA table	SS	DF	MS	F (DFn, DFd)	P value
	ANOVA table	SS	DF	MS	F (DFn, DFd)	P value					ANOVA table	SS	DF	MS	F (DFn, DFd)	P value					Treatment (between columns)	1286	2	643.1	F (2, 12) = 46.01	P<0.0001
	Treatment (between columns)	0.009804	2	0.004902	F (2, 12) = 16.74	P=0.0003					Treatment (between columns)	11.12	2	5.558	F (2, 12) = 50.72	P<0.0001					Residual (within columns)	167.7	12	13.98
	Residual (within columns)	0.003514	12	0.0002928							Residual (within columns)	1.315	12	0.1096							Total	1454	14
	Total	0.01332	14								Total	12.43	14
																					Data summary
	Data summary										Data summary										Number of treatments (columns)	3
	Number of treatments (columns)	3									Number of treatments (columns)	3									Number of values (total)	15
	Number of values (total)	15									Number of values (total)	15
	Number of families	1									Number of families	1									Number of families	1
	Number of comparisons per family	2									Number of comparisons per family	2									Number of comparisons per family	2
	Alpha	0.05									Alpha	0.05									Alpha	0.05
	Šídák's multiple comparisons test	Mean Diff.	95.00% CI of diff.	Below threshold?	Summary	Adjusted P Value					Šídák's multiple comparisons test	Mean Diff.	95.00% CI of diff.	Below threshold?	Summary	Adjusted P Value					Šídák's multiple comparisons test	Mean Diff.	95.00% CI of diff.	Below threshold?	Summary	Adjusted P Value
	Male vs. Sham	0.0374	0.009768 to 0.06503	Yes	**	0.0095	A-B				Male vs. Sham	1.515	0.9808 to 2.050	Yes	****	<0.0001	A-B				Male vs. Sham	15.93	9.893 to 21.97	Yes	****	<0.0001	A-B
	Male vs. OVX	0.0622	0.03457 to 0.08983	Yes	***	0.0002	A-C				Male vs. OVX	2.028	1.493 to 2.562	Yes	****	<0.0001	A-C				Male vs. OVX	21.95	15.91 to 27.99	Yes	****	<0.0001	A-C
	Test details	Mean 1	Mean 2	Mean Diff.	SE of diff.	n1	n2	t	DF		Test details	Mean 1	Mean 2	Mean Diff.	SE of diff.	n1	n2	t	DF		Test details	Mean 1	Mean 2	Mean Diff.	SE of diff.	n1	n2	t	DF
	Male vs. Sham	0.1034	0.066	0.0374	0.01082	5	5	3.456	12		Male vs. Sham	4.615	3.099	1.515	0.2094	5	5	7.238	12		Male vs. Sham	33.73	17.8	15.93	2.365	5	5	6.737	12
	Male vs. OVX	0.1034	0.0412	0.0622	0.01082	5	5	5.747	12		Male vs. OVX	4.615	2.587	2.028	0.2094	5	5	9.684	12		Male vs. OVX	33.73	11.78	21.95	2.365	5	5	9.282	12
