# Supplementary material for: Induction of osteogenesis by bone-targeted Notch activation
Source: eLife. 2022 Feb 4;11:e60183. doi: 10.7554/eLife.60183 (PMC8880996; doi:10.7554/eLife.60183)
Supplement: Figure 7—figure supplement 1—source data 1. [file elife-60183-fig7-figsupp1-data1.xlsx]

## Sheet: Sheet1
Figure 7-figure supplement 1-source data 1
B	Dll4 area/ DAPI area (%)	Ctrl	Dll4(E12)	PTH	PTH+Dll4(E12)					C	Col1a area/ DAPI area (%)	Ctrl	Dll4(E12)	PTH	PTH+Dll4(E12)					D	Pdgfrb area/ DAPI area (%)	Ctrl	Dll4(E12)	PTH	PTH+Dll4(E12)					E	Emcn area/ DAPI area (%)	Ctrl	Dll4(E12)	PTH	PTH+Dll4(E12)
		0.112	0.273	0.185	0.594							13.504	16.769	28.425	38.483							18.111	21.182	18.84	29.494							29.457	37.816	35.3	47.73
		0.081	0.282	0.12	0.541							12.68	17.384	22.731	56.955							15.756	17.198	23.15	31.366							30.605	41.404	37.729	47.255
		0.031	0.383	0.141	1.06							14.993	19.842	26.738	48.775							15.889	17.378	25.084	29.528							30.814	44.988	42.301	44.911
		0.057	0.102	0.074	0.517							13.513	11.501	27.489	51.941							20.904	16.833	22.115	31.73							34.293	32.383	38.969	45.046
		0.048	0.258		1.081							18.278	15.209		73.125							17.762	19.872	24.523	33.154							30.155	30.521	40.33	50.853
			0.173										13.32																				30.607
																					Table Analyzed	PDGFRb/DAPI (%)
	Table Analyzed	Dll4/DAPI (%)									Table Analyzed	Col1a/DAPI (%)									Data sets analyzed	A-D									Table Analyzed	EMCN/DAPI (%)
	Data sets analyzed	A-D									Data sets analyzed	A-D
																					ANOVA summary										Brown-Forsythe ANOVA test
	ANOVA summary										ANOVA summary										F	45.13									F* (DFn, DFd)	17.49 (3.000, 9.860)
	F	20.21									F	37.61									P value	<0.0001									P value	0.0003
	P value	<0.0001									P value	<0.0001									P value summary	****									P value summary	***
	P value summary	****									P value summary	****									Significant diff. among means (P < 0.05)?	Yes									Significant diff. among means (P < 0.05)?	Yes
	Significant diff. among means (P < 0.05)?	Yes									Significant diff. among means (P < 0.05)?	Yes									R squared	0.8943
	R squared	0.7912									R squared	0.8758																			Welch's ANOVA test
																					Brown-Forsythe test										W (DFn, DFd)	40.76 (3.000, 9.300)
	Brown-Forsythe test										Brown-Forsythe test										F (DFn, DFd)	0.1341 (3, 16)									P value	<0.0001
	F (DFn, DFd)	2.485 (3, 16)									F (DFn, DFd)	2.725 (3, 16)									P value	0.9383									P value summary	****
	P value	0.0979									P value	0.0786									P value summary	ns									Significant diff. among means (P < 0.05)?	Yes
	P value summary	ns									P value summary	ns									Are SDs significantly different (P < 0.05)?	No
	Are SDs significantly different (P < 0.05)?	No									Are SDs significantly different (P < 0.05)?	No																			Data summary
																					Bartlett's test										Number of treatments (columns)	4
	Bartlett's test										Bartlett's test										Bartlett's statistic (corrected)	0.7741									Number of values (total)	21
	Bartlett's statistic (corrected)	17.9									Bartlett's statistic (corrected)	16.19									P value	0.8557
	P value	0.0005									P value	0.001									P value summary	ns									Number of families	1
	P value summary	***									P value summary	**									Are SDs significantly different (P < 0.05)?	No									Number of comparisons per family	4
	Are SDs significantly different (P < 0.05)?	Yes									Are SDs significantly different (P < 0.05)?	Yes																			Alpha	0.05
																					ANOVA table	SS	DF	MS	F (DFn, DFd)	P value
	ANOVA table	SS	DF	MS	F (DFn, DFd)	P value					ANOVA table	SS	DF	MS	F (DFn, DFd)	P value					Treatment (between columns)	562.4	3	187.5	F (3, 16) = 45.13	P<0.0001					Dunnett's T3 multiple comparisons test	Mean Diff.	95.00% CI of diff.	Below threshold?	Summary	Adjusted P Value
	Treatment (between columns)	1.459	3	0.4863	F (3, 16) = 20.21	P<0.0001					Treatment (between columns)	5147	3	1716	F (3, 16) = 37.61	P<0.0001					Residual (within columns)	66.47	16	4.155							Ctrl vs. PTH	-7.861	-13.32 to -2.401	Yes	**	0.0036	A-C
	Residual (within columns)	0.3849	16	0.02406							Residual (within columns)	730	16	45.62							Total	628.9	19								Ctrl vs. PTH+Dll4(E12)	-16.09	-21.04 to -11.15	Yes	****	<0.0001	A-D
	Total	1.844	19								Total	5877	19																		Dll4(E12) vs. PTH+Dll4(E12)	-10.87	-21.07 to -0.6709	Yes	*	0.0183	B-D
																					Data summary										PTH vs. PTH+Dll4(E12)	-8.233	-14.02 to -2.446	Yes	**	0.0033	C-D
	Data summary										Data summary										Number of treatments (columns)	4
	Number of treatments (columns)	4									Number of treatments (columns)	4									Number of values (total)	20									Test details	Mean 1	Mean 2	Mean Diff.	SE of diff.	n1	n2	t	DF
	Number of values (total)	20									Number of values (total)	20																			Ctrl vs. PTH	31.06	38.93	-7.861	1.45	5	5	5.421	7.219
																					Number of families	1									Ctrl vs. PTH+Dll4(E12)	31.06	47.16	-16.09	1.371	5	5	11.74	7.53
	Number of families	1									Number of families	1									Number of comparisons per family	4									Dll4(E12) vs. PTH+Dll4(E12)	36.29	47.16	-10.87	2.709	6	5	4.013	6.779
	Number of comparisons per family	4									Number of comparisons per family	4									Alpha	0.05									PTH vs. PTH+Dll4(E12)	38.93	47.16	-8.233	1.604	5	5	5.134	7.941
	Alpha	0.05									Alpha	0.05
																					Šídák's multiple comparisons test	Mean Diff.	95.00% CI of diff.	Below threshold?	Summary	Adjusted P Value
	Šídák's multiple comparisons test	Mean Diff.	95.00% CI of diff.	Below threshold?	Summary	Adjusted P Value					Šídák's multiple comparisons test	Mean Diff.	95.00% CI of diff.	Below threshold?	Summary	Adjusted P Value					Ctrl vs. PTH	-5.058	-8.672 to -1.444	Yes	**	0.0048	A-C
	Ctrl vs. PTH	-0.0642	-0.3559 to 0.2275	No	ns	0.9575	A-C				Ctrl vs. PTH	-11.75	-24.46 to 0.9520	No	ns	0.0761	A-C				Ctrl vs. PTH+Dll4(E12)	-13.37	-16.98 to -9.756	Yes	****	<0.0001	A-D
	Ctrl vs. PTH+Dll4(E12)	-0.6928	-0.9679 to -0.4177	Yes	****	<0.0001	A-D				Ctrl vs. PTH+Dll4(E12)	-39.26	-51.24 to -27.28	Yes	****	<0.0001	A-D				Dll4(E12) vs. PTH+Dll4(E12)	-12.56	-16.18 to -8.947	Yes	****	<0.0001	B-D
	Dll4(E12) vs. PTH+Dll4(E12)	-0.5134	-0.7768 to -0.2501	Yes	***	0.0002	B-D				Dll4(E12) vs. PTH+Dll4(E12)	-38.18	-49.65 to -26.72	Yes	****	<0.0001	B-D				PTH vs. PTH+Dll4(E12)	-8.312	-11.93 to -4.698	Yes	****	<0.0001	C-D
	PTH vs. PTH+Dll4(E12)	-0.6286	-0.9203 to -0.3369	Yes	****	<0.0001	C-D				PTH vs. PTH+Dll4(E12)	-27.51	-40.21 to -14.81	Yes	****	<0.0001	C-D
																					Test details	Mean 1	Mean 2	Mean Diff.	SE of diff.	n1	n2	t	DF
	Test details	Mean 1	Mean 2	Mean Diff.	SE of diff.	n1	n2	t	DF		Test details	Mean 1	Mean 2	Mean Diff.	SE of diff.	n1	n2	t	DF		Ctrl vs. PTH	17.68	22.74	-5.058	1.289	5	5	3.924	16
	Ctrl vs. PTH	0.0658	0.13	-0.0642	0.1041	5	4	0.617	16		Ctrl vs. PTH	14.59	26.35	-11.75	4.531	5	4	2.594	16		Ctrl vs. PTH+Dll4(E12)	17.68	31.05	-13.37	1.289	5	5	10.37	16
	Ctrl vs. PTH+Dll4(E12)	0.0658	0.7586	-0.6928	0.0981	5	5	7.062	16		Ctrl vs. PTH+Dll4(E12)	14.59	53.86	-39.26	4.272	5	5	9.191	16		Dll4(E12) vs. PTH+Dll4(E12)	18.49	31.05	-12.56	1.289	5	5	9.744	16
	Dll4(E12) vs. PTH+Dll4(E12)	0.2452	0.7586	-0.5134	0.09392	6	5	5.466	16		Dll4(E12) vs. PTH+Dll4(E12)	15.67	53.86	-38.18	4.09	6	5	9.336	16		PTH vs. PTH+Dll4(E12)	22.74	31.05	-8.312	1.289	5	5	6.448	16
	PTH vs. PTH+Dll4(E12)	0.13	0.7586	-0.6286	0.1041	4	5	6.041	16		PTH vs. PTH+Dll4(E12)	26.35	53.86	-27.51	4.531	4	5	6.071	16
