# Supplementary material for: Induction of osteogenesis by bone-targeted Notch activation
Source: eLife. 2022 Feb 4;11:e60183. doi: 10.7554/eLife.60183 (PMC8880996; doi:10.7554/eLife.60183)
Supplement: Figure 7—figure supplement 2—source data 1. [file elife-60183-fig7-figsupp2-data1.xlsx]

## Sheet: Sheet1
Figure 7-figure supplement 2-source data 1
A	OSX + cell number at mp	Ctrl	Dll4(E12)	PTH	PTH+Dll4(E12)					A	Length methaphysis (um)	Ctrl	Dll4(E12)	PTH	PTH+Dll4(E12)					B	OPN area/ DAPI area (%)	Ctrl	Dll4(E12)	PTH	PTH+Dll4(E12)
		3018	4848	9690	15687							320.805	505.234	825.927	1537.14							1.479	1.712	6.087	5.695
		2829	3812	11628	20734							274.097	353.731	768.353	2335.28							1.735	1.763	5.669	7.591
		3838	3909	9945	15635							541.51	532.603	1104.28	1793.99							1.673	1.037	2.692	4.088
		3590	3894	7611	16805							311.257	529.119	811.819	2060.55							2.941	1.912	4.172	6.654
		4067	4341	10699	27724							405.075	355.156	1063.34	3077.12							2.507	1.981	5.006	5.722
	Table Analyzed	OSX number mp									Table Analyzed	Length mp									Table Analyzed	OPN/DAPI (%)
	Data sets analyzed	A-D									Data sets analyzed	A-D									Data sets analyzed	A-D
	ANOVA summary										ANOVA summary										ANOVA summary
	F	36.87									F	34.49									F	21.14
	P value	<0.0001									P value	<0.0001									P value	<0.0001
	P value summary	****									P value summary	****									P value summary	****
	Significant diff. among means (P < 0.05)?	Yes									Significant diff. among means (P < 0.05)?	Yes									Significant diff. among means (P < 0.05)?	Yes
	R squared	0.8736									R squared	0.8661									R squared	0.7986
	Brown-Forsythe test										Brown-Forsythe test										Brown-Forsythe test
	F (DFn, DFd)	2.049 (3, 16)									F (DFn, DFd)	3.112 (3, 16)									F (DFn, DFd)	1.383 (3, 16)
	P value	0.1476									P value	0.0558									P value	0.2839
	P value summary	ns									P value summary	ns									P value summary	ns
	Are SDs significantly different (P < 0.05)?	No									Are SDs significantly different (P < 0.05)?	No									Are SDs significantly different (P < 0.05)?	No
	Bartlett's test										Bartlett's test										Bartlett's test
	Bartlett's statistic (corrected)	24.63									Bartlett's statistic (corrected)	17.14									Bartlett's statistic (corrected)	6.561
	P value	<0.0001									P value	0.0007									P value	0.0873
	P value summary	****									P value summary	***									P value summary	ns
	Are SDs significantly different (P < 0.05)?	Yes									Are SDs significantly different (P < 0.05)?	Yes									Are SDs significantly different (P < 0.05)?	No
	ANOVA table	SS	DF	MS	F (DFn, DFd)	P value					ANOVA table	SS	DF	MS	F (DFn, DFd)	P value					ANOVA table	SS	DF	MS	F (DFn, DFd)	P value
	Treatment (between columns)	805540966	3	268513655	F (3, 16) = 36.87	P<0.0001					Treatment (between columns)	10226887	3	3408962	F (3, 16) = 34.49	P<0.0001					Treatment (between columns)	64.11	3	21.37	F (3, 16) = 21.14	P<0.0001
	Residual (within columns)	116521039	16	7282565							Residual (within columns)	1581521	16	98845							Residual (within columns)	16.17	16	1.011
	Total	922062005	19								Total	11808408	19								Total	80.28	19
	Data summary										Data summary										Data summary
	Number of treatments (columns)	4									Number of treatments (columns)	4									Number of treatments (columns)	4
	Number of values (total)	20									Number of values (total)	20									Number of values (total)	20
	Number of families	1																			Number of families	1
	Number of comparisons per family	4									Number of families	1									Number of comparisons per family	4
	Alpha	0.05									Number of comparisons per family	4									Alpha	0.05
											Alpha	0.05
	Šídák's multiple comparisons test	Mean Diff.	95.00% CI of diff.	Below threshold?	Summary	Adjusted P Value															Šídák's multiple comparisons test	Mean Diff.	95.00% CI of diff.	Below threshold?	Summary	Adjusted P Value
	Ctrl vs. PTH	-6446	-11232 to -1661	Yes	**	0.0066	A-C				Šídák's multiple comparisons test	Mean Diff.	95.00% CI of diff.	Below threshold?	Summary	Adjusted P Value					Ctrl vs. PTH+Dll4(E12)	-3.883	-5.666 to -2.100	Yes	****	<0.0001	A-D
	Ctrl vs. PTH+Dll4(E12)	-15849	-20634 to -11063	Yes	****	<0.0001	A-D				Ctrl vs. PTH	-544.2	-1102 to 13.32	No	ns	0.0572	A-C				Dll4(E12) vs. PTH+Dll4(E12)	-4.269	-6.052 to -2.486	Yes	****	<0.0001	B-D
	Dll4(E12) vs. PTH+Dll4(E12)	-15156	-19942 to -10371	Yes	****	<0.0001	B-D				Ctrl vs. PTH+Dll4(E12)	-1790	-2348 to -1233	Yes	****	<0.0001	A-D				PTH vs. PTH+Dll4(E12)	-1.225	-3.008 to 0.5579	No	ns	0.2584	C-D
	PTH vs. PTH+Dll4(E12)	-9402	-14188 to -4617	Yes	***	0.0002	C-D				Dll4(E12) vs. PTH+Dll4(E12)	-1706	-2263 to -1148	Yes	****	<0.0001	B-D				Ctrl vs. PTH	-2.658	-4.441 to -0.8755	Yes	**	0.0028	A-C
											PTH vs. PTH+Dll4(E12)	-1246	-1804 to -688.6	Yes	****	<0.0001	C-D
	Test details	Mean 1	Mean 2	Mean Diff.	SE of diff.	n1	n2	t	DF												Test details	Mean 1	Mean 2	Mean Diff.	SE of diff.	n1	n2	t	DF
	Ctrl vs. PTH	3468	9915	-6446	1707	5	5	3.777	16		Test details	Mean 1	Mean 2	Mean Diff.	SE of diff.	n1	n2	t	DF		Ctrl vs. PTH+Dll4(E12)	2.067	5.95	-3.883	0.6358	5	5	6.107	16
	Ctrl vs. PTH+Dll4(E12)	3468	19317	-15849	1707	5	5	9.286	16		Ctrl vs. PTH	370.5	914.7	-544.2	198.8	5	5	2.737	16		Dll4(E12) vs. PTH+Dll4(E12)	1.681	5.95	-4.269	0.6358	5	5	6.714	16
	Dll4(E12) vs. PTH+Dll4(E12)	4161	19317	-15156	1707	5	5	8.88	16		Ctrl vs. PTH+Dll4(E12)	370.5	2161	-1790	198.8	5	5	9.003	16		PTH vs. PTH+Dll4(E12)	4.725	5.95	-1.225	0.6358	5	5	1.926	16
	PTH vs. PTH+Dll4(E12)	9915	19317	-9402	1707	5	5	5.509	16		Dll4(E12) vs. PTH+Dll4(E12)	455.2	2161	-1706	198.8	5	5	8.578	16		Ctrl vs. PTH	2.067	4.725	-2.658	0.6358	5	5	4.181	16
											PTH vs. PTH+Dll4(E12)	914.7	2161	-1246	198.8	5	5	6.267	16
