# Supplementary material for: Induction of osteogenesis by bone-targeted Notch activation
Source: eLife. 2022 Feb 4;11:e60183. doi: 10.7554/eLife.60183 (PMC8880996; doi:10.7554/eLife.60183)
Supplement: Figure 7—source data 1. [file elife-60183-fig7-data1.xlsx]

## Sheet: Sheet1
Figure 7-source data 1
B	Trabecular BV/TV	Ctrl	Dll4(E12)	PTH	PTH+Dll4(E12)					C	Connectivity density	Ctrl	Dll4(E12)	PTH	PTH+Dll4(E12)					D	Tb. Number	Ctrl	Dll4(E12)	PTH	PTH+Dll4(E12)
		0.031	0.038	0.081	0.161							80.945	92.653	260.882	1176.24							2.518	2.779	2.353	3.301
		0.031	0.03	0.109	0.219							92.952	92.712	514.369	2053.32							2.907	2.614	3.099	5.301
		0.037	0.027	0.116	0.153							91.247	80.99	451.149	1183.07							2.797	2.538	2.933	3.168
		0.035	0.03	0.064	0.2							99.704	81.778	178.879	1797.51							2.701	2.308	2.812	5.414
		0.036	0.028	0.1	0.234							107.752	72.786	473.448	2604.24							2.595	2.409	2.988	6.873
	Table Analyzed	Trabecular BV/TV									Table Analyzed	Connectivity density									Table Analyzed	Tb. Number
	Brown-Forsythe ANOVA test										Brown-Forsythe ANOVA test										Brown-Forsythe ANOVA test
	F* (DFn, DFd)	66.59 (3.000, 6.759)									F* (DFn, DFd)	32.84 (3.000, 4.471)									F* (DFn, DFd)	8.776 (3.000, 4.466)
	P value	<0.0001									P value	0.0017									P value	0.0248
	P value summary	****									P value summary	**									P value summary	*
	Significant diff. among means (P < 0.05)?	Yes									Significant diff. among means (P < 0.05)?	Yes									Significant diff. among means (P < 0.05)?	Yes
	Welch's ANOVA test										Welch's ANOVA test										Welch's ANOVA test
	W (DFn, DFd)	40.89 (3.000, 7.806)									W (DFn, DFd)	17.18 (3.000, 7.967)									W (DFn, DFd)	4.078 (3.000, 8.356)
	P value	<0.0001									P value	0.0008									P value	0.0474
	P value summary	****									P value summary	***									P value summary	*
	Significant diff. among means (P < 0.05)?	Yes									Significant diff. among means (P < 0.05)?	Yes									Significant diff. among means (P < 0.05)?	Yes
	Data summary										Data summary										Data summary
	Number of treatments (columns)	4									Number of treatments (columns)	4									Number of treatments (columns)	4
	Number of values (total)	20									Number of values (total)	20									Number of values (total)	20
	Number of families	1									Number of families	1									Number of families	1
	Number of comparisons per family	4									Number of comparisons per family	4									Number of comparisons per family	4
	Alpha	0.05									Alpha	0.05									Alpha	0.05
	Dunnett's T3 multiple comparisons test	Mean Diff.	95.00% CI of diff.	Below threshold?	Summary	Adjusted P Value					Dunnett's T3 multiple comparisons test	Mean Diff.	95.00% CI of diff.	Below threshold?	Summary	Adjusted P Value					Dunnett's T3 multiple comparisons test	Mean Diff.	95.00% CI of diff.	Below threshold?	Summary	Adjusted P Value
	Ctrl vs. PTH	-0.06	-0.1073 to -0.01272	Yes	*	0.0107	A-C				Ctrl vs. PTH	-281.2	-605.5 to 43.00	Yes	*	0.0405	A-C				Ctrl vs. PTH	-0.1334	-0.7196 to 0.4528	No	ns	0.8302	A-C
	Ctrl vs. PTH+Dll4(E12)	-0.1594	-0.2377 to -0.08111	Yes	**	0.0018	A-D				Ctrl vs. PTH+Dll4(E12)	-1668	-3005 to -332.2	Yes	*	0.0114	A-D				Ctrl vs. PTH+Dll4(E12)	-2.108	-5.576 to 1.360	No	ns	0.121	A-D
	Dll4(E12) vs. PTH+Dll4(E12)	-0.1628	-0.2414 to -0.08417	Yes	**	0.0017	B-D				Dll4(E12) vs. PTH+Dll4(E12)	-1679	-3015 to -342.6	Yes	*	0.0111	B-D				Dll4(E12) vs. PTH+Dll4(E12)	-2.282	-5.756 to 1.193	No	ns	0.0969	B-D
	PTH vs. PTH+Dll4(E12)	-0.0994	-0.1690 to -0.02975	Yes	**	0.0038	C-D				PTH vs. PTH+Dll4(E12)	-1387	-2762 to -12.53	Yes	*	0.0242	C-D				PTH vs. PTH+Dll4(E12)	-1.974	-5.484 to 1.535	No	ns	0.1494	C-D
	Test details	Mean 1	Mean 2	Mean Diff.	SE of diff.	n1	n2	t	DF		Test details	Mean 1	Mean 2	Mean Diff.	SE of diff.	n1	n2	t	DF		Test details	Mean 1	Mean 2	Mean Diff.	SE of diff.	n1	n2	t	DF
	Ctrl vs. PTH	0.034	0.094	-0.06	0.009607	5	5	6.245	4.141		Ctrl vs. PTH	94.52	375.7	-281.2	65.88	5	5	4.269	4.037		Ctrl vs. PTH	2.704	2.837	-0.1334	0.1469	5	5	0.9078	6.122
	Ctrl vs. PTH+Dll4(E12)	0.034	0.1934	-0.1594	0.01591	5	5	10.02	4.051		Ctrl vs. PTH+Dll4(E12)	94.52	1763	-1668	271.5	5	5	6.145	4.002		Ctrl vs. PTH+Dll4(E12)	2.704	4.811	-2.108	0.7047	5	5	2.991	4.078
	Dll4(E12) vs. PTH+Dll4(E12)	0.0306	0.1934	-0.1628	0.01598	5	5	10.19	4.12		Dll4(E12) vs. PTH+Dll4(E12)	84.18	1763	-1679	271.5	5	5	6.183	4.002		Dll4(E12) vs. PTH+Dll4(E12)	2.53	4.811	-2.282	0.706	5	5	3.232	4.108
	PTH vs. PTH+Dll4(E12)	0.094	0.1934	-0.0994	0.0185	5	5	5.374	6.553		PTH vs. PTH+Dll4(E12)	375.7	1763	-1387	279.3	5	5	4.966	4.467		PTH vs. PTH+Dll4(E12)	2.837	4.811	-1.974	0.7131	5	5	2.769	4.273
E	Bone surface	Ctrl	Dll4(E12)	PTH	PTH+Dll4(E12)					F	Tb. thickness	Ctrl	Dll4(E12)	PTH	PTH+Dll4(E12)					G	Tb. separation	Ctrl	Dll4(E12)	PTH	PTH+Dll4(E12)
		16.623	18.674	33.381	77.217							0.034	0.037	0.039	0.033							0.394	0.357	0.413	0.325
		18.674	18.287	51.4	104.39							0.03	0.031	0.036	0.031							0.344	0.379	0.324	0.209
		20.28	17.484	44.604	68.748							0.035	0.03	0.038	0.032							0.354	0.394	0.349	0.345
		19.56	18.134	23.929	102.352							0.033	0.034	0.036	0.03							0.37	0.436	0.351	0.2
		18.834	16.026	45.605	153.787							0.033	0.032	0.034	0.029							0.383	0.418	0.329	0.157
	Table Analyzed	Bone surface									Table Analyzed	Tb. thickness									Table Analyzed	Tb. separation
											Data sets analyzed	A-D									Data sets analyzed	A-D
	Brown-Forsythe ANOVA test
	F* (DFn, DFd)	25.17 (3.000, 4.893)									ANOVA summary										ANOVA summary
	P value	0.0021									F	6.29									F	9.003
	P value summary	**									P value	0.005									P value	0.001
	Significant diff. among means (P < 0.05)?	Yes									P value summary	**									P value summary	**
											Significant diff. among means (P < 0.05)?	Yes									Significant diff. among means (P < 0.05)?	Yes
	Welch's ANOVA test										R squared	0.5411									R squared	0.628
	W (DFn, DFd)	14.98 (3.000, 7.906)
	P value	0.0013									Brown-Forsythe test										Brown-Forsythe test
	P value summary	**									F (DFn, DFd)	0.3723 (3, 16)									F (DFn, DFd)	1.874 (3, 16)
	Significant diff. among means (P < 0.05)?	Yes									P value	0.7741									P value	0.1747
											P value summary	ns									P value summary	ns
	Data summary										Are SDs significantly different (P < 0.05)?	No									Are SDs significantly different (P < 0.05)?	No
	Number of treatments (columns)	4
	Number of values (total)	20									Bartlett's test										Bartlett's test
											Bartlett's statistic (corrected)	1.298									Bartlett's statistic (corrected)	7.997
	Number of families	1									P value	0.7296									P value	0.0461
	Number of comparisons per family	4									P value summary	ns									P value summary	*
	Alpha	0.05									Are SDs significantly different (P < 0.05)?	No									Are SDs significantly different (P < 0.05)?	Yes
	Dunnett's T3 multiple comparisons test	Mean Diff.	95.00% CI of diff.	Below threshold?	Summary	Adjusted P Value					ANOVA table	SS	DF	MS	F (DFn, DFd)	P value					ANOVA table	SS	DF	MS	F (DFn, DFd)	P value
	Ctrl vs. PTH	-20.99	-45.40 to 3.420	Yes	*	0.0417	A-C				Treatment (between columns)	8.255e-05	3	2.752e-05	F (3, 16) = 6.290	P=0.0050					Treatment (between columns)	0.06422	3	0.02141	F (3, 16) = 9.003	P=0.0010
	Ctrl vs. PTH+Dll4(E12)	-82.5	-155.6 to -9.400	Yes	*	0.0163	A-D				Residual (within columns)	7e-05	16	4.375e-06							Residual (within columns)	0.03804	16	0.002378
	Dll4(E12) vs. PTH+Dll4(E12)	-83.58	-156.7 to -10.50	Yes	*	0.0156	B-D				Total	0.0001526	19								Total	0.1023	19
	PTH vs. PTH+Dll4(E12)	-61.52	-129.3 to 6.224	Yes	*	0.0365	C-D
											Data summary										Data summary
	Test details	Mean 1	Mean 2	Mean Diff.	SE of diff.	n1	n2	t	DF		Number of treatments (columns)	4									Number of treatments (columns)	4
	Ctrl vs. PTH	18.79	39.78	-20.99	4.96	5	5	4.232	4.124		Number of values (total)	20									Number of values (total)	20
	Ctrl vs. PTH+Dll4(E12)	18.79	101.3	-82.5	14.85	5	5	5.554	4.014
	Dll4(E12) vs. PTH+Dll4(E12)	17.72	101.3	-83.58	14.85	5	5	5.629	4.008		Number of families	1									Number of families	1
	PTH vs. PTH+Dll4(E12)	39.78	101.3	-61.52	15.64	5	5	3.934	4.869		Number of comparisons per family	4									Number of comparisons per family	4
											Alpha	0.05									Alpha	0.05
											Šídák's multiple comparisons test	Mean Diff.	95.00% CI of diff.	Below threshold?	Summary	Adjusted P Value					Šídák's multiple comparisons test	Mean Diff.	95.00% CI of diff.	Below threshold?	Summary	Adjusted P Value
											Ctrl vs. PTH	-0.0036	-0.007309 to 0.0001091	No	ns	0.059	A-C				Ctrl vs. PTH	0.0158	-0.07067 to 0.1023	No	ns	0.9781	A-C
											Ctrl vs. PTH+Dll4(E12)	0.002	-0.001709 to 0.005709	No	ns	0.4782	A-D				Ctrl vs. PTH+Dll4(E12)	0.1218	0.03533 to 0.2083	Yes	**	0.0046	A-D
											Dll4(E12) vs. PTH+Dll4(E12)	0.0018	-0.001909 to 0.005509	No	ns	0.5748	B-D				Dll4(E12) vs. PTH+Dll4(E12)	0.1496	0.06313 to 0.2361	Yes	***	0.0007	B-D
											PTH vs. PTH+Dll4(E12)	0.0056	0.001891 to 0.009309	Yes	**	0.0025	C-D				PTH vs. PTH+Dll4(E12)	0.106	0.01953 to 0.1925	Yes	*	0.0135	C-D
											Test details	Mean 1	Mean 2	Mean Diff.	SE of diff.	n1	n2	t	DF		Test details	Mean 1	Mean 2	Mean Diff.	SE of diff.	n1	n2	t	DF
											Ctrl vs. PTH	0.033	0.0366	-0.0036	0.001323	5	5	2.721	16		Ctrl vs. PTH	0.369	0.3532	0.0158	0.03084	5	5	0.5123	16
											Ctrl vs. PTH+Dll4(E12)	0.033	0.031	0.002	0.001323	5	5	1.512	16		Ctrl vs. PTH+Dll4(E12)	0.369	0.2472	0.1218	0.03084	5	5	3.949	16
											Dll4(E12) vs. PTH+Dll4(E12)	0.0328	0.031	0.0018	0.001323	5	5	1.361	16		Dll4(E12) vs. PTH+Dll4(E12)	0.3968	0.2472	0.1496	0.03084	5	5	4.851	16
											PTH vs. PTH+Dll4(E12)	0.0366	0.031	0.0056	0.001323	5	5	4.233	16		PTH vs. PTH+Dll4(E12)	0.3532	0.2472	0.106	0.03084	5	5	3.437	16
I	Cortical BV/TV	Ctrl	Dll4(E12)	PTH	PTH+Dll4(E12)					J	Cortical thickness	Ctrl	Dll4(E12)	PTH	PTH+Dll4(E12)					K	Cortical porosity	Ctrl	Dll4(E12)	PTH	PTH+Dll4(E12)
		0.4468	0.458	0.4357	0.4449							0.1731	0.1809	0.1764	0.1754							0.28	0.22	0.36	0.34
		0.4311	0.4345	0.47	0.5198							0.1627	0.171	0.1876	0.1976							0.34	0.29	1.11	0.59
		0.439	0.4215	0.4749	0.4669							0.1674	0.1682	0.1895	0.1819							0.43	0.27	0.57	0.34
		0.4416	0.4102	0.4871	0.4894							0.1695	0.161	0.1941	0.1962							0.31	0.29	0.39	0.39
		0.4532	0.4241	0.4487	0.4722							0.1742	0.1667	0.1806	0.1866							0.31	0.26	0.4	0.77
	Table Analyzed	Cortical BV/TV									Table Analyzed	Cortical thickness									Table Analyzed	Cortical porosity
	Data sets analyzed	A-D									Data sets analyzed	A-D									Data sets analyzed	A-D
	ANOVA summary										ANOVA summary										ANOVA summary
	F	5.894									F	9.177									F	2.71
	P value	0.0066									P value	0.0009									P value	0.0797
	P value summary	**									P value summary	***									P value summary	ns
	Significant diff. among means (P < 0.05)?	Yes									Significant diff. among means (P < 0.05)?	Yes									Significant diff. among means (P < 0.05)?	No
	R squared	0.525									R squared	0.6324									R squared	0.3369
	Brown-Forsythe test										Brown-Forsythe test										Brown-Forsythe test
	F (DFn, DFd)	0.8718 (3, 16)									F (DFn, DFd)	0.6673 (3, 16)									F (DFn, DFd)	1.082 (3, 16)
	P value	0.4762									P value	0.5843									P value	0.3847
	P value summary	ns									P value summary	ns									P value summary	ns
	Are SDs significantly different (P < 0.05)?	No									Are SDs significantly different (P < 0.05)?	No									Are SDs significantly different (P < 0.05)?	No
	Bartlett's test										Bartlett's test										Bartlett's test
	Bartlett's statistic (corrected)	4.482									Bartlett's statistic (corrected)	1.714									Bartlett's statistic (corrected)	18.14
	P value	0.2139									P value	0.6339									P value	0.0004
	P value summary	ns									P value summary	ns									P value summary	***
	Are SDs significantly different (P < 0.05)?	No									Are SDs significantly different (P < 0.05)?	No									Are SDs significantly different (P < 0.05)?	Yes
	ANOVA table	SS	DF	MS	F (DFn, DFd)	P value					ANOVA table	SS	DF	MS	F (DFn, DFd)	P value					ANOVA table	SS	DF	MS	F (DFn, DFd)	P value
	Treatment (between columns)	0.007103	3	0.002368	F (3, 16) = 5.894	P=0.0066					Treatment (between columns)	0.001475	3	0.0004915	F (3, 16) = 9.177	P=0.0009					Treatment (between columns)	0.2829	3	0.09431	F (3, 16) = 2.710	P=0.0797
	Residual (within columns)	0.006427	16	0.0004017							Residual (within columns)	0.000857	16	5.356e-05							Residual (within columns)	0.5569	16	0.03481
	Total	0.01353	19								Total	0.002332	19								Total	0.8398	19
	Data summary										Data summary										Data summary
	Number of treatments (columns)	4									Number of treatments (columns)	4									Number of treatments (columns)	4
	Number of values (total)	20									Number of values (total)	20									Number of values (total)	20
	Number of families	1									Number of families	1									Number of families	1
	Number of comparisons per family	4									Number of comparisons per family	4									Number of comparisons per family	4
	Alpha	0.05									Alpha	0.05									Alpha	0.05
	Šídák's multiple comparisons test	Mean Diff.	95.00% CI of diff.	Below threshold?	Summary	Adjusted P Value					Šídák's multiple comparisons test	Mean Diff.	95.00% CI of diff.	Below threshold?	Summary	Adjusted P Value					Šídák's multiple comparisons test	Mean Diff.	95.00% CI of diff.	Below threshold?	Summary	Adjusted P Value
	Ctrl vs. PTH	-0.02094	-0.05648 to 0.01460	No	ns	0.3949	A-C				Ctrl vs. PTH	-0.01626	-0.02924 to -0.003282	Yes	*	0.0115	A-C				Ctrl vs. PTH	-0.232	-0.5628 to 0.09882	No	ns	0.2418	A-C
	Ctrl vs. PTH+Dll4(E12)	-0.0363	-0.07184 to -0.0007597	Yes	*	0.0443	A-D				Ctrl vs. PTH+Dll4(E12)	-0.01816	-0.03114 to -0.005182	Yes	**	0.0048	A-D				Ctrl vs. PTH+Dll4(E12)	-0.152	-0.4828 to 0.1788	No	ns	0.6222	A-D
	Dll4(E12) vs. PTH+Dll4(E12)	-0.04898	-0.08452 to -0.01344	Yes	**	0.0055	B-D				Dll4(E12) vs. PTH+Dll4(E12)	-0.01798	-0.03096 to -0.005002	Yes	**	0.0053	B-D				Dll4(E12) vs. PTH+Dll4(E12)	-0.22	-0.5508 to 0.1108	No	ns	0.2858	B-D
	PTH vs. PTH+Dll4(E12)	-0.01536	-0.05090 to 0.02018	No	ns	0.672	C-D				PTH vs. PTH+Dll4(E12)	-0.0019	-0.01488 to 0.01108	No	ns	0.9904	C-D				PTH vs. PTH+Dll4(E12)	0.08	-0.2508 to 0.4108	No	ns	0.9411	C-D
	Test details	Mean 1	Mean 2	Mean Diff.	SE of diff.	n1	n2	t	DF		Test details	Mean 1	Mean 2	Mean Diff.	SE of diff.	n1	n2	t	DF		Test details	Mean 1	Mean 2	Mean Diff.	SE of diff.	n1	n2	t	DF
	Ctrl vs. PTH	0.4423	0.4633	-0.02094	0.01268	5	5	1.652	16		Ctrl vs. PTH	0.1694	0.1856	-0.01626	0.004629	5	5	3.513	16		Ctrl vs. PTH	0.334	0.566	-0.232	0.118	5	5	1.966	16
	Ctrl vs. PTH+Dll4(E12)	0.4423	0.4786	-0.0363	0.01268	5	5	2.864	16		Ctrl vs. PTH+Dll4(E12)	0.1694	0.1875	-0.01816	0.004629	5	5	3.923	16		Ctrl vs. PTH+Dll4(E12)	0.334	0.486	-0.152	0.118	5	5	1.288	16
	Dll4(E12) vs. PTH+Dll4(E12)	0.4297	0.4786	-0.04898	0.01268	5	5	3.864	16		Dll4(E12) vs. PTH+Dll4(E12)	0.1696	0.1875	-0.01798	0.004629	5	5	3.885	16		Dll4(E12) vs. PTH+Dll4(E12)	0.266	0.486	-0.22	0.118	5	5	1.865	16
	PTH vs. PTH+Dll4(E12)	0.4633	0.4786	-0.01536	0.01268	5	5	1.212	16		PTH vs. PTH+Dll4(E12)	0.1856	0.1875	-0.0019	0.004629	5	5	0.4105	16		PTH vs. PTH+Dll4(E12)	0.566	0.486	0.08	0.118	5	5	0.678	16
