# Supplementary material for: Induction of osteogenesis by bone-targeted Notch activation
Source: eLife. 2022 Feb 4;11:e60183. doi: 10.7554/eLife.60183 (PMC8880996; doi:10.7554/eLife.60183)
Supplement: Figure 8—figure supplement 2—source data 1. [file elife-60183-fig8-figsupp2-data1.xlsx]

## Sheet: Summary
Figure 8-figure supplement 2-source data 1
A-C	Software	Seurat (4.0.4)		D	Software	Category		E	See source data for Figure 8 (Osteoblast)
	Method	FindMarkers			Method	hyperGtest
	Parameters	assay='RNA'			Parameters	ontology='BP'
		logfc.threshold=0.0				conditional=FALSE
		test.use='wilcox'				testDirection='over'
		min.pct=0.0				annotation=org.Mm.eg.db
		min.cells.feature=0			DE log2-fold change cutoff	0.1
		min.cells.group=0			DE padj cutoff	1e-10
	Statistical Test	Wilcoxon Rank Sum			Statistical Test	Hypergeometric Test
	Multiple testing correction	Bonferroni			Multiple testing correction	Bonferroni
	Columns				Columns
	gene_name	Gene symbol			GOBPID	Gene Ontology ID
	p_val	Wilcoxon Rank Sum P-value			Pvalue	Hypergeometric test P-value
	avg_log2FC	Average log2-fold change Dll4(E12) / Control			OddsRatio	Hypergeometric test odds ratio
	pct.1	Fraction of cells expressing gene in Dll4(E12)			ExpCount	Expected count
	pct.2	Fraction of cells expressing gene in control			Count	Observed Count
	p_val_adj	Bonferroni adjusted P-value			Size	Size of gene set
	ensembl	Ensembl gene ID			Term	GO term
					padj	Bonferroni adjusted P-value
	Excluded from plot	Mitochondrial genes (mt-)
		Pseudo genes (Gm*)
	Gene subset	Gene Ontology "Notch signaling pathway" (GO:0007219)
	Differential expression results in sheets DE-EC, DE-MSC, DE-Chondrocyte, and DE-Osteoblast				Test results in sheets GO-EC, GO-MSC, GO-Chondrocyte, GO-Osteoblast

## Sheet: DE-EC
gene_name	p_val	avg_log2FC	pct.1	pct.2	p_val_adj	ensembl
App	1.68902e-08	-0.107417	0.958	0.953	0.000339291	ENSMUSG00000022892
Lfng	9.9093e-07	0.172807	0.324	0.212	0.0199058	ENSMUSG00000029570
Dtx3	9.49912e-05	0.107817	0.138	0.078	1	ENSMUSG00000040415
Neurl1b	0.00024088	0.0503363	0.074	0.033	1	ENSMUSG00000034413
Itgb1bp1	0.000245248	0.055907	0.089	0.044	1	ENSMUSG00000062352
Adam17	0.000276874	0.0963349	0.298	0.209	1	ENSMUSG00000052593
Hp	0.000757154	0.0714709	0.08	0.04	1	ENSMUSG00000031722
Dll1	0.00150869	0.0733197	0.167	0.11	1	ENSMUSG00000014773
Mmp14	0.00326865	0.0759056	0.38	0.297	1	ENSMUSG00000000957
Gata2	0.00751721	-0.166217	0.237	0.278	1	ENSMUSG00000015053
Hey1	0.00825313	-0.11523	0.073	0.109	1	ENSMUSG00000040289
Ptp4a3	0.00869565	0.0742295	0.255	0.196	1	ENSMUSG00000059895
Gdpd5	0.00982334	0.0286475	0.045	0.022	1	ENSMUSG00000035314
Prag1	0.00994636	0.0459143	0.068	0.039	1	ENSMUSG00000050271
Cfd	0.0105859	-0.0781261	0.013	0.032	1	ENSMUSG00000061780
Bmp2	0.0124697	0.104935	0.113	0.078	1	ENSMUSG00000027358
Psen1	0.0137542	0.0419729	0.167	0.119	1	ENSMUSG00000019969
Maml3	0.0152769	0.0320683	0.116	0.079	1	ENSMUSG00000061143
Il6st	0.0177634	-0.112351	0.569	0.592	1	ENSMUSG00000021756
Tspan14	0.0197475	0.0577101	0.56	0.462	1	ENSMUSG00000037824
Snai1	0.0198241	0.015116	0.136	0.096	1	ENSMUSG00000042821
Akt1s1	0.0223394	0.0130848	0.077	0.049	1	ENSMUSG00000011096
Cdkn1b	0.0255838	-0.147825	0.29	0.318	1	ENSMUSG00000003031
Llgl1	0.0297247	0.0192717	0.136	0.098	1	ENSMUSG00000020536
Dtx4	0.032873	0.0177184	0.022	0.009	1	ENSMUSG00000039982
Angpt4	0.0388599	0.00795886	0.013	0.004	1	ENSMUSG00000027460
Sel1l	0.0395653	0.0285634	0.241	0.188	1	ENSMUSG00000020964
Enho	0.0410203	0.0264319	0.044	0.025	1	ENSMUSG00000028445
Pofut1	0.0420022	0.0144746	0.07	0.046	1	ENSMUSG00000046020
Galnt11	0.0456784	0.042056	0.048	0.029	1	ENSMUSG00000038072
Tspan15	0.0463524	0.0361468	0.3	0.246	1	ENSMUSG00000037031
Wdr12	0.049674	0.0330204	0.11	0.081	1	ENSMUSG00000026019
Arrb1	0.0500427	0.0410737	0.343	0.28	1	ENSMUSG00000018909
Anxa4	0.0505275	0.0203277	0.167	0.128	1	ENSMUSG00000029994
Kcna5	0.0505569	0.0112956	0.017	0.007	1	ENSMUSG00000045534
Tgfb2	0.0511033	0.0526797	0.125	0.093	1	ENSMUSG00000039239
Foxc1	0.0522165	0.0300737	0.138	0.103	1	ENSMUSG00000050295
Sox9	0.0525139	0.0401946	0.023	0.011	1	ENSMUSG00000000567
Mfng	0.0535732	0.0262927	0.196	0.154	1	ENSMUSG00000018169
Stat3	0.0537896	-0.122753	0.357	0.374	1	ENSMUSG00000004040
Tmem100	0.0612233	-0.0935128	0.06	0.082	1	ENSMUSG00000069763
Ift74	0.0696025	0.00648543	0.068	0.047	1	ENSMUSG00000028576
Got1	0.0730459	0.0259031	0.044	0.027	1	ENSMUSG00000025190
Il2ra	0.0771623	0.00972116	0.013	0.005	1	ENSMUSG00000026770
Nrarp	0.079545	0.0412563	0.292	0.243	1	ENSMUSG00000078202
Maml1	0.082181	0.0199166	0.093	0.068	1	ENSMUSG00000050567
Tspan5	0.0875776	0.0226107	0.168	0.133	1	ENSMUSG00000028152
Grip2	0.0947097	-0.00589619	0	0.004	1	ENSMUSG00000030098
Cd46	0.096368	-0.0164955	0.004	0.012	1	ENSMUSG00000016493
Egfl7	0.0988011	0.0669717	0.769	0.687	1	ENSMUSG00000026921
Dll4	0.103257	-0.101346	0.34	0.354	1	ENSMUSG00000027314
Reck	0.106974	-0.00069421	0.044	0.028	1	ENSMUSG00000028476
Pear1	0.114134	0.0457662	0.176	0.144	1	ENSMUSG00000028073
Hes1	0.117076	-0.104665	0.428	0.426	1	ENSMUSG00000022528
Poglut1	0.118228	-0.0112145	0.071	0.052	1	ENSMUSG00000034064
Notch1	0.124461	-0.123973	0.425	0.426	1	ENSMUSG00000026923
Rbm15	0.12469	0.00875668	0.054	0.037	1	ENSMUSG00000048109
Nepro	0.133288	0.0103399	0.012	0.005	1	ENSMUSG00000036208
Kctd10	0.146445	-0.0797781	0.273	0.293	1	ENSMUSG00000001098
Kit	0.146645	0.017572	0.029	0.018	1	ENSMUSG00000005672
Ncstn	0.155112	0.00870822	0.254	0.214	1	ENSMUSG00000003458
Aph1a	0.158024	0.00737832	0.245	0.204	1	ENSMUSG00000015750
Timp4	0.173097	-0.0522213	0.017	0.027	1	ENSMUSG00000030317
Numb	0.183712	-0.117283	0.237	0.245	1	ENSMUSG00000021224
Slc35c1	0.223619	0.0133558	0.025	0.016	1	ENSMUSG00000049922
Epn1	0.229478	-0.0209024	0.212	0.181	1	ENSMUSG00000035203
Bmp7	0.237807	-0.00480316	0	0.002	1	ENSMUSG00000008999
Dlk1	0.237807	-0.00873161	0	0.002	1	ENSMUSG00000040856
Notch3	0.261773	0.0260075	0.062	0.05	1	ENSMUSG00000038146
Zbtb7a	0.26395	-0.00979305	0.28	0.239	1	ENSMUSG00000035011
S1pr3	0.266723	0.0127189	0.019	0.012	1	ENSMUSG00000067586
Susd5	0.275345	-0.0183336	0.012	0.018	1	ENSMUSG00000086596
Cdk6	0.287028	0.0151313	0.067	0.054	1	ENSMUSG00000040274
Cebpa	0.289189	-0.0245533	0.016	0.023	1	ENSMUSG00000034957
Nfkbia	0.292675	0.0360935	0.466	0.415	1	ENSMUSG00000021025
Hif1an	0.296867	0.025052	0.052	0.041	1	ENSMUSG00000036450
Rfng	0.321945	0.00114575	0.048	0.037	1	ENSMUSG00000025158
Slc35c2	0.323243	0.00765393	0.035	0.026	1	ENSMUSG00000017664
Pln	0.326074	-0.024604	0.013	0.019	1	ENSMUSG00000038583
Ift88	0.328189	0.0236277	0.028	0.02	1	ENSMUSG00000040040
Xirp1	0.338147	-0.0045958	0.001	0.004	1	ENSMUSG00000079243
Heyl	0.342252	0.00416569	0.02	0.014	1	ENSMUSG00000032744
Nle1	0.357153	0.012795	0.019	0.013	1	ENSMUSG00000020692
Hes7	0.368635	0.000832156	0.003	0.001	1	ENSMUSG00000023781
Epn2	0.380264	0.0139315	0.168	0.151	1	ENSMUSG00000001036
Bend6	0.390904	0.00135272	0.004	0.002	1	ENSMUSG00000042182
Arrdc1	0.39435	0.0169794	0.044	0.035	1	ENSMUSG00000026972
Eya1	0.404352	-0.00179061	0	0.001	1	ENSMUSG00000025932
Dner	0.404352	-0.00136741	0	0.001	1	ENSMUSG00000036766
Cntn1	0.404352	-0.00311297	0	0.001	1	ENSMUSG00000055022
Bmp2k	0.436283	0.0146252	0.094	0.083	1	ENSMUSG00000034663
Jag2	0.43753	-0.0517261	0.261	0.271	1	ENSMUSG00000002799
Postn	0.451017	-0.0108802	0.013	0.009	1	ENSMUSG00000027750
Nkapl	0.451049	-0.00315941	0.006	0.009	1	ENSMUSG00000059395
Dtx2	0.455794	-0.0231432	0.015	0.019	1	ENSMUSG00000004947
Notch4	0.469087	-0.0380673	0.35	0.31	1	ENSMUSG00000015468
Dicer1	0.479025	-0.00818027	0.067	0.058	1	ENSMUSG00000041415
Cbfa2t2	0.479953	0.00695309	0.033	0.027	1	ENSMUSG00000038533
Rps19	0.484164	-0.0359488	0.705	0.667	1	ENSMUSG00000040952
Foxc2	0.493904	-0.00571483	0.033	0.027	1	ENSMUSG00000046714
Sorbs2	0.504297	0.0172877	0.253	0.234	1	ENSMUSG00000031626
Psenen	0.541023	-0.0330994	0.395	0.351	1	ENSMUSG00000036835
Rbpj	0.541099	-0.00896492	0.122	0.109	1	ENSMUSG00000039191
Hhex	0.604883	-0.0686207	0.205	0.205	1	ENSMUSG00000024986
Zmiz1	0.65219	0.0105766	0.389	0.36	1	ENSMUSG00000007817
Snai2	0.658168	-0.0396982	0.06	0.064	1	ENSMUSG00000022676
Robo1	0.686636	-0.0282691	0.039	0.043	1	ENSMUSG00000022883
Fbxw7	0.690531	-0.00817163	0.09	0.083	1	ENSMUSG00000028086
Nkap	0.704297	-0.0209727	0.104	0.096	1	ENSMUSG00000016409
Rita1	0.708555	0.00523004	0.009	0.007	1	ENSMUSG00000029600
Tgfbr2	0.719774	0.000795114	0.746	0.699	1	ENSMUSG00000032440
Rcan2	0.725729	-0.0151122	0.07	0.064	1	ENSMUSG00000039601
Pdcd10	0.743975	0.00990544	0.206	0.196	1	ENSMUSG00000027835
Gas2	0.747593	-0.00173537	0.006	0.007	1	ENSMUSG00000030498
Psen2	0.751409	-0.0347017	0.199	0.199	1	ENSMUSG00000010609
Adam10	0.754989	-0.0101464	0.374	0.351	1	ENSMUSG00000054693
Bcl6	0.756321	0.00876436	0.016	0.014	1	ENSMUSG00000022508
Jag1	0.75825	-0.0248287	0.164	0.153	1	ENSMUSG00000027276
Mib1	0.759915	-0.0461286	0.206	0.19	1	ENSMUSG00000024294
Cdh6	0.768976	-0.00287433	0.009	0.01	1	ENSMUSG00000039385
Nod2	0.775228	-0.0158214	0.017	0.019	1	ENSMUSG00000055994
Spen	0.777784	-0.0203362	0.142	0.134	1	ENSMUSG00000040761
Dtx3l	0.779461	-0.0274156	0.135	0.127	1	ENSMUSG00000049502
Robo2	0.785337	-0.00129812	0.001	0.002	1	ENSMUSG00000052516
Maml2	0.78768	-0.0208379	0.155	0.147	1	ENSMUSG00000031925
Chac1	0.797697	0.00211217	0.001	0.001	1	ENSMUSG00000027313
Foxa2	0.797697	0.00102738	0.001	0.001	1	ENSMUSG00000037025
Aph1c	0.797697	0.00237484	0.001	0.001	1	ENSMUSG00000053040
Neurl1a	0.797697	0.00507225	0.001	0.001	1	ENSMUSG00000006435
Notch2	0.809952	-0.0087384	0.023	0.021	1	ENSMUSG00000027878
Tgfb1	0.812105	-0.0207389	0.061	0.063	1	ENSMUSG00000002603
Nrip2	0.814747	-0.00614624	0.035	0.032	1	ENSMUSG00000001520
Tbx2	0.823597	-0.0118405	0.025	0.026	1	ENSMUSG00000000093
Llgl2	0.892649	-0.00351415	0.009	0.008	1	ENSMUSG00000020782
Hey2	0.90374	0.00275193	0.016	0.015	1	ENSMUSG00000019789
Aph1b	0.908359	-0.00799697	0.023	0.022	1	ENSMUSG00000032375
Fat4	0.918715	-0.029527	0.084	0.081	1	ENSMUSG00000046743
Synj2bp	0.923665	-0.0378182	0.218	0.204	1	ENSMUSG00000090935
Aak1	0.933667	0.0163972	0.062	0.064	1	ENSMUSG00000057230
Zfp423	0.948166	-0.0245885	0.099	0.096	1	ENSMUSG00000045333
Mib2	0.971178	-0.0242427	0.022	0.021	1	ENSMUSG00000029060
Perp	0.973957	-0.00480796	0.007	0.007	1	ENSMUSG00000019851
Ift172	0.99465	-0.0283617	0.025	0.024	1	ENSMUSG00000038564
Trp63	1	0	0	0	1	ENSMUSG00000022510
Dlk2	1	0	0	0	1	ENSMUSG00000047428

## Sheet: DE-MSC
gene_name	p_val	avg_log2FC	pct.1	pct.2	p_val_adj	ensembl
Angpt4	5.04157e-118	0.383765	0.42	0.176	1.01275e-113	ENSMUSG00000027460
App	1.13007e-71	-0.126533	0.974	0.954	2.27009e-67	ENSMUSG00000022892
Notch3	5.48459e-69	-0.394551	0.376	0.493	1.10174e-64	ENSMUSG00000038146
Snai2	3.26807e-50	-0.310895	0.496	0.562	6.5649e-46	ENSMUSG00000022676
Heyl	9.50402e-35	-0.244081	0.077	0.153	1.90917e-30	ENSMUSG00000032744
Notch2	1.48389e-16	0.0679492	0.285	0.193	2.98084e-12	ENSMUSG00000027878
Epn1	1.71333e-16	0.0489802	0.215	0.138	3.44173e-12	ENSMUSG00000035203
Arrb1	1.09631e-15	0.0676256	0.145	0.086	2.20226e-11	ENSMUSG00000018909
Adam17	4.33656e-15	0.0511125	0.252	0.17	8.71128e-11	ENSMUSG00000052593
Cdk6	5.43871e-15	0.0551139	0.142	0.085	1.09253e-10	ENSMUSG00000040274
Tspan14	3.40041e-13	0.0549512	0.265	0.186	6.83075e-09	ENSMUSG00000037824
Tgfbr2	8.16035e-13	0.0400535	0.365	0.263	1.63925e-08	ENSMUSG00000032440
Lfng	1.64077e-12	0.044345	0.302	0.216	3.29597e-08	ENSMUSG00000029570
Psen2	6.94061e-12	0.0419348	0.13	0.082	1.39423e-07	ENSMUSG00000010609
Rfng	1.36638e-11	0.0409148	0.124	0.077	2.74479e-07	ENSMUSG00000025158
Foxc1	4.6485e-10	-0.0666205	0.862	0.784	9.3379e-06	ENSMUSG00000050295
Sel1l	5.23627e-10	0.0319994	0.358	0.268	1.05186e-05	ENSMUSG00000020964
Reck	2.75636e-08	0.025038	0.122	0.082	0.000553698	ENSMUSG00000028476
Sorbs2	4.4295e-08	0.0211974	0.201	0.147	0.000889799	ENSMUSG00000031626
Kctd10	4.9963e-08	0.0211029	0.126	0.086	0.00100366	ENSMUSG00000001098
Bcl6	7.40284e-08	0.0184064	0.196	0.144	0.00148708	ENSMUSG00000022508
Itgb1bp1	1.57615e-07	0.0208668	0.073	0.045	0.00316616	ENSMUSG00000062352
Psen1	1.62792e-07	0.00631459	0.21	0.156	0.00327016	ENSMUSG00000019969
Fat4	2.38778e-07	0.0203761	0.119	0.083	0.00479658	ENSMUSG00000046743
Galnt11	3.62087e-07	0.0192637	0.086	0.056	0.00727361	ENSMUSG00000038072
Psenen	5.16215e-07	-0.0136574	0.342	0.266	0.0103697	ENSMUSG00000036835
Gata2	8.21609e-07	-0.0304226	0.003	0.012	0.0165045	ENSMUSG00000015053
Aph1a	2.4523e-06	0.00464647	0.219	0.168	0.0492618	ENSMUSG00000015750
Zbtb7a	3.78588e-06	0.00369172	0.283	0.221	0.0760507	ENSMUSG00000035011
Snai1	8.58718e-06	0.0231519	0.084	0.059	0.172499	ENSMUSG00000042821
Aak1	9.34236e-06	0.00859407	0.088	0.062	0.187669	ENSMUSG00000057230
Llgl1	1.00998e-05	0.0103894	0.139	0.104	0.202884	ENSMUSG00000020536
Il6st	1.86839e-05	0.0131314	0.54	0.428	0.375321	ENSMUSG00000021756
Akt1s1	3.69724e-05	0.00848391	0.086	0.062	0.742702	ENSMUSG00000011096
Aph1b	3.90807e-05	0.0062531	0.069	0.048	0.785053	ENSMUSG00000032375
Mmp14	4.32961e-05	0.021882	0.579	0.461	0.869731	ENSMUSG00000000957
Dtx3l	4.8652e-05	-0.00195751	0.164	0.126	0.977321	ENSMUSG00000049502
Slc35c2	8.73739e-05	0.0104528	0.064	0.044	1	ENSMUSG00000017664
Nkap	0.000115694	-0.00226535	0.11	0.082	1	ENSMUSG00000016409
Foxc2	0.000136853	0.0106635	0.051	0.034	1	ENSMUSG00000046714
Anxa4	0.000137912	-0.0139111	0.197	0.155	1	ENSMUSG00000029994
Ncstn	0.000154585	-0.0192651	0.373	0.297	1	ENSMUSG00000003458
Maml1	0.000349075	0.00743515	0.077	0.057	1	ENSMUSG00000050567
Cebpa	0.000363466	-0.00715231	0.399	0.322	1	ENSMUSG00000034957
Poglut1	0.000421597	-0.010456	0.106	0.081	1	ENSMUSG00000034064
Hif1an	0.000519142	0.0072473	0.053	0.037	1	ENSMUSG00000036450
Hes1	0.000572954	-0.132964	0.44	0.427	1	ENSMUSG00000022528
Dtx4	0.000577621	-0.0189645	0.157	0.124	1	ENSMUSG00000039982
Bmp2k	0.000622473	-0.00559876	0.106	0.082	1	ENSMUSG00000034663
Ift74	0.000654691	-0.00461444	0.086	0.065	1	ENSMUSG00000028576
Tbx2	0.000932558	0.00903043	0.053	0.038	1	ENSMUSG00000000093
Arrdc1	0.00102256	0.00819456	0.03	0.019	1	ENSMUSG00000026972
Spen	0.00117437	0.00133842	0.118	0.093	1	ENSMUSG00000040761
Robo2	0.00175589	-0.0323603	0.012	0.02	1	ENSMUSG00000052516
Pear1	0.00178355	0.00429916	0.034	0.022	1	ENSMUSG00000028073
Llgl2	0.00206042	0.00420251	0.013	0.006	1	ENSMUSG00000020782
Pofut1	0.00208972	0.0025624	0.096	0.075	1	ENSMUSG00000046020
Wdr12	0.00289483	0.00777625	0.082	0.065	1	ENSMUSG00000026019
Numb	0.00305831	-0.00244241	0.103	0.082	1	ENSMUSG00000021224
Eya1	0.00355004	0.00889706	0.058	0.043	1	ENSMUSG00000025932
Nfkbia	0.00368866	-0.0358962	0.332	0.275	1	ENSMUSG00000021025
Epn2	0.00370765	-0.0126358	0.124	0.101	1	ENSMUSG00000001036
Notch4	0.0047009	0.00492141	0.014	0.008	1	ENSMUSG00000015468
Kit	0.00478531	-0.0164072	0.004	0.009	1	ENSMUSG00000005672
Prag1	0.0052928	-0.00751147	0.084	0.067	1	ENSMUSG00000050271
Cbfa2t2	0.00571024	-0.00261632	0.049	0.037	1	ENSMUSG00000038533
Pdcd10	0.00653117	-0.0182948	0.128	0.106	1	ENSMUSG00000027835
Slc35c1	0.00762225	0.00134951	0.043	0.032	1	ENSMUSG00000049922
Zfp423	0.00884885	-0.0167792	0.111	0.091	1	ENSMUSG00000045333
Ift172	0.0102001	0.0081788	0.025	0.017	1	ENSMUSG00000038564
S1pr3	0.0118365	-0.0110066	0.528	0.436	1	ENSMUSG00000067586
Tspan5	0.0126395	0.00283049	0.029	0.02	1	ENSMUSG00000028152
Tmem100	0.016676	-0.0139249	0.099	0.081	1	ENSMUSG00000069763
Bmp2	0.0171113	-0.0120849	0.084	0.069	1	ENSMUSG00000027358
Maml2	0.0196014	-0.0146903	0.109	0.091	1	ENSMUSG00000031925
Dtx2	0.0210332	0.0055214	0.026	0.018	1	ENSMUSG00000004947
Jag2	0.025872	-0.00383937	0	0.001	1	ENSMUSG00000002799
Rita1	0.0294156	0.00496459	0.018	0.013	1	ENSMUSG00000029600
Rcan2	0.0331196	-0.0201356	0.07	0.058	1	ENSMUSG00000039601
Hey1	0.0373676	-0.0175377	0.073	0.061	1	ENSMUSG00000040289
Nrip2	0.0401907	-0.00266133	0.043	0.035	1	ENSMUSG00000001520
Fbxw7	0.0408373	-0.00170406	0.052	0.042	1	ENSMUSG00000028086
Dtx3	0.0434165	-0.0551862	0.163	0.138	1	ENSMUSG00000040415
Hes7	0.0450374	0.00314515	0.003	0.001	1	ENSMUSG00000023781
Got1	0.0481301	-0.00188342	0.033	0.025	1	ENSMUSG00000025190
Aph1c	0.0503832	-0.00203923	0.024	0.018	1	ENSMUSG00000053040
Jag1	0.0614406	-0.0208854	0.099	0.084	1	ENSMUSG00000027276
Dicer1	0.0815588	-0.0143134	0.06	0.051	1	ENSMUSG00000041415
Cdh6	0.0896716	0.00176588	0.007	0.004	1	ENSMUSG00000039385
Mib2	0.1021	-0.000239044	0.04	0.033	1	ENSMUSG00000029060
Synj2bp	0.111405	-0.0316584	0.125	0.109	1	ENSMUSG00000090935
Timp4	0.114009	-0.0665301	0.106	0.113	1	ENSMUSG00000030317
Neurl1b	0.153291	-0.00737442	0.002	0.003	1	ENSMUSG00000034413
Adam10	0.172066	-0.0501918	0.186	0.164	1	ENSMUSG00000054693
Rbpj	0.18109	-0.105244	0.364	0.341	1	ENSMUSG00000039191
Dlk2	0.189301	0.00169398	0.001	0	1	ENSMUSG00000047428
Nod2	0.21073	0.000867761	0	0	1	ENSMUSG00000055994
Mib1	0.222472	-0.0446705	0.162	0.145	1	ENSMUSG00000024294
Ptp4a3	0.239836	-0.0422547	0.099	0.088	1	ENSMUSG00000059895
Stat3	0.249671	-0.0507872	0.482	0.408	1	ENSMUSG00000004040
Cntn1	0.2521	-0.0041832	0.023	0.019	1	ENSMUSG00000055022
Egfl7	0.256512	0.000847467	0.005	0.003	1	ENSMUSG00000026921
Xirp1	0.258619	-0.00110798	0	0	1	ENSMUSG00000079243
Perp	0.258619	-0.000394286	0	0	1	ENSMUSG00000019851
Cfd	0.266132	0.000128155	0.002	0.001	1	ENSMUSG00000061780
Hey2	0.269678	-0.0118732	0.008	0.01	1	ENSMUSG00000019789
Nle1	0.279108	0.00365938	0.013	0.01	1	ENSMUSG00000020692
Foxa2	0.281182	0.000635612	0.001	0	1	ENSMUSG00000037025
Bend6	0.288098	-0.0121742	0.007	0.009	1	ENSMUSG00000042182
Nrarp	0.289159	-0.00315967	0.001	0.001	1	ENSMUSG00000078202
Bmp7	0.289583	-0.00263539	0.001	0.001	1	ENSMUSG00000008999
Tgfb2	0.299464	-0.0291572	0.041	0.044	1	ENSMUSG00000039239
Cdkn1b	0.303849	-0.108343	0.349	0.323	1	ENSMUSG00000003031
Gas2	0.310878	0.00124935	0.006	0.004	1	ENSMUSG00000030498
Trp63	0.341507	-0.00667704	0.004	0.005	1	ENSMUSG00000022510
Notch1	0.346024	-0.0703139	0.105	0.107	1	ENSMUSG00000026923
Hhex	0.374866	0.00105035	0.001	0.001	1	ENSMUSG00000024986
Hp	0.385282	0.00589344	0.918	0.858	1	ENSMUSG00000031722
Sox9	0.406071	-0.0368303	0.08	0.073	1	ENSMUSG00000000567
Chac1	0.42725	-0.000592804	0	0	1	ENSMUSG00000027313
Dner	0.445609	0.000611833	0.001	0	1	ENSMUSG00000036766
Tgfb1	0.446744	-0.0055632	0.017	0.015	1	ENSMUSG00000002603
Postn	0.532229	-0.0275378	0.045	0.041	1	ENSMUSG00000027750
Rps19	0.540241	-0.104096	0.498	0.448	1	ENSMUSG00000040952
Zmiz1	0.559288	-0.0699036	0.277	0.247	1	ENSMUSG00000007817
Gdpd5	0.666387	-0.000610894	0.004	0.003	1	ENSMUSG00000035314
Dll1	0.711377	-0.00264761	0.004	0.004	1	ENSMUSG00000014773
Enho	0.714737	-0.00144032	0.001	0.001	1	ENSMUSG00000028445
Dll4	0.729233	8.92716e-05	0.001	0.001	1	ENSMUSG00000027314
Mfng	0.764907	0.00164027	0.001	0.001	1	ENSMUSG00000018169
Tspan15	0.786747	-0.00335512	0.003	0.003	1	ENSMUSG00000037031
Pln	0.862547	-0.000139226	0	0	1	ENSMUSG00000038583
Dlk1	0.862547	-0.00156354	0	0	1	ENSMUSG00000040856
Neurl1a	0.862547	-0.00119858	0	0	1	ENSMUSG00000006435
Nepro	0.877537	-0.00360613	0.006	0.006	1	ENSMUSG00000036208
Ift88	0.917404	-0.0228473	0.034	0.033	1	ENSMUSG00000040040
Cd46	0.937935	-0.00432483	0.008	0.008	1	ENSMUSG00000016493
Maml3	0.963424	-0.0231989	0.046	0.045	1	ENSMUSG00000061143
Robo1	0.965739	-0.0495407	0.095	0.092	1	ENSMUSG00000022883
Susd5	0.96581	-0.00543707	0.005	0.005	1	ENSMUSG00000086596
Nkapl	0.969605	-0.00202085	0.006	0.006	1	ENSMUSG00000059395
Rbm15	0.984693	-0.021213	0.039	0.039	1	ENSMUSG00000048109
Il2ra	1	0	0	0	1	ENSMUSG00000026770
Grip2	1	0	0	0	1	ENSMUSG00000030098
Kcna5	1	0	0	0	1	ENSMUSG00000045534

## Sheet: DE-Chondrocyte
gene_name	p_val	avg_log2FC	pct.1	pct.2	p_val_adj	ensembl
Sox9	1.8925e-14	-0.0891617	0.964	0.985	3.80165e-10	ENSMUSG00000000567
App	4.87868e-11	-0.0560959	0.92	0.94	9.8003e-07	ENSMUSG00000022892
Chac1	1.62011e-07	0.0263731	0.061	0.018	0.00325448	ENSMUSG00000027313
Snai2	1.11708e-06	-0.106555	0.45	0.506	0.02244	ENSMUSG00000022676
Ptp4a3	8.10496e-06	0.0720575	0.136	0.078	0.162813	ENSMUSG00000059895
Zmiz1	4.95757e-05	-0.0988298	0.582	0.617	0.995876	ENSMUSG00000007817
Enho	5.90859e-05	0.0312165	0.07	0.033	1	ENSMUSG00000028445
Bmp2	0.000149514	0.0609395	0.151	0.097	1	ENSMUSG00000027358
Nfkbia	0.000595272	0.0583387	0.536	0.449	1	ENSMUSG00000021025
Sorbs2	0.000670376	-0.0734078	0.149	0.196	1	ENSMUSG00000031626
Dlk2	0.00120708	0.012909	0.041	0.018	1	ENSMUSG00000047428
Kcna5	0.00126024	0.0108307	0.023	0.007	1	ENSMUSG00000045534
Kctd10	0.00210676	0.0326627	0.246	0.185	1	ENSMUSG00000001098
Bmp2k	0.00221067	-0.0338817	0.043	0.072	1	ENSMUSG00000034663
Aph1a	0.00222063	0.0369383	0.406	0.317	1	ENSMUSG00000015750
Itgb1bp1	0.00266576	0.0136277	0.149	0.103	1	ENSMUSG00000062352
Angpt4	0.00409506	0.0116996	0.018	0.005	1	ENSMUSG00000027460
Slc35c1	0.00553045	0.0287706	0.171	0.124	1	ENSMUSG00000049922
Epn2	0.00628647	0.042727	0.202	0.155	1	ENSMUSG00000001036
Aph1b	0.00809876	-0.0323696	0.085	0.116	1	ENSMUSG00000032375
Foxa2	0.0103561	0.0187828	0.284	0.223	1	ENSMUSG00000037025
Sel1l	0.0107757	0.032935	0.548	0.45	1	ENSMUSG00000020964
Slc35c2	0.0116648	0.00888468	0.22	0.169	1	ENSMUSG00000017664
Epn1	0.0129371	0.0394419	0.341	0.275	1	ENSMUSG00000035203
Hp	0.0147162	0.0208577	0.079	0.053	1	ENSMUSG00000031722
Hes1	0.0164673	0.0709633	0.545	0.475	1	ENSMUSG00000022528
Ift88	0.0200982	-0.0512641	0.216	0.244	1	ENSMUSG00000040040
Cd46	0.0215242	-0.00833466	0.009	0.021	1	ENSMUSG00000016493
Lfng	0.0250926	0.00837706	0.014	0.005	1	ENSMUSG00000029570
Zfp423	0.0269292	0.0138124	0.049	0.03	1	ENSMUSG00000045333
Akt1s1	0.0286849	0.00344084	0.242	0.192	1	ENSMUSG00000011096
Galnt11	0.0313759	0.0215661	0.253	0.203	1	ENSMUSG00000038072
Dner	0.0342003	-0.022101	0.042	0.061	1	ENSMUSG00000036766
Snai1	0.0345657	-0.0732076	0.473	0.48	1	ENSMUSG00000042821
Rfng	0.0353892	0.0341275	0.221	0.177	1	ENSMUSG00000025158
Foxc2	0.0369279	-0.0376571	0.077	0.1	1	ENSMUSG00000046714
Llgl2	0.0450618	0.00453153	0.017	0.008	1	ENSMUSG00000020782
Tgfbr2	0.0468513	-0.0400855	0.74	0.726	1	ENSMUSG00000032440
Adam17	0.0480892	0.0352909	0.309	0.256	1	ENSMUSG00000052593
Timp4	0.0491626	0.00312332	0.007	0.002	1	ENSMUSG00000030317
Rbpj	0.0551165	-0.050964	0.346	0.355	1	ENSMUSG00000039191
Ncstn	0.062562	0.0136922	0.25	0.204	1	ENSMUSG00000003458
Postn	0.066119	-0.00785294	0.002	0.007	1	ENSMUSG00000027750
Rbm15	0.0691006	-0.0301915	0.087	0.108	1	ENSMUSG00000048109
Hes7	0.0768368	0.00285871	0.003	0	1	ENSMUSG00000023781
Foxc1	0.0861761	-0.0422452	0.671	0.665	1	ENSMUSG00000050295
Tbx2	0.0918762	0.00233933	0.005	0.001	1	ENSMUSG00000000093
Robo1	0.100233	-0.0094694	0.044	0.059	1	ENSMUSG00000022883
Rita1	0.120629	0.00617617	0.07	0.053	1	ENSMUSG00000029600
Arrdc1	0.153455	0.00280357	0.032	0.022	1	ENSMUSG00000026972
Tgfb1	0.153568	-0.018456	0.095	0.11	1	ENSMUSG00000002603
Gata2	0.170817	-0.00912268	0.01	0.016	1	ENSMUSG00000015053
Mib1	0.19135	-0.0272542	0.356	0.352	1	ENSMUSG00000024294
Cebpa	0.218734	-0.011649	0.025	0.034	1	ENSMUSG00000034957
Cntn1	0.229654	-0.00312128	0.003	0.006	1	ENSMUSG00000055022
Maml2	0.241205	-0.0383143	0.32	0.318	1	ENSMUSG00000031925
Got1	0.263075	0.00549209	0.122	0.104	1	ENSMUSG00000025190
Numb	0.271038	-0.0198567	0.088	0.099	1	ENSMUSG00000021224
Cdkn1b	0.276979	-0.0376975	0.599	0.576	1	ENSMUSG00000003031
Jag2	0.287292	0.00271367	0.005	0.003	1	ENSMUSG00000002799
Adam10	0.295641	-0.0302455	0.096	0.106	1	ENSMUSG00000054693
Nrip2	0.297667	-0.00134397	0.003	0.001	1	ENSMUSG00000001520
Aph1c	0.300058	-0.00321968	0.018	0.024	1	ENSMUSG00000053040
Notch1	0.306809	0.00609133	0.016	0.011	1	ENSMUSG00000026923
Nrarp	0.307495	0.000467296	0.001	0	1	ENSMUSG00000078202
Xirp1	0.307495	0.000672575	0.001	0	1	ENSMUSG00000079243
Cdh6	0.307495	0.00067316	0.001	0	1	ENSMUSG00000039385
Mfng	0.307495	0.000419399	0.001	0	1	ENSMUSG00000018169
Maml3	0.308405	-0.0136349	0.053	0.062	1	ENSMUSG00000061143
Neurl1b	0.311268	-0.0163468	0.102	0.115	1	ENSMUSG00000034413
Il2ra	0.327979	-0.00178961	0	0.001	1	ENSMUSG00000026770
Hey2	0.327979	-0.000702414	0	0.001	1	ENSMUSG00000019789
Zbtb7a	0.338747	-0.0180273	0.347	0.344	1	ENSMUSG00000035011
Jag1	0.34126	-0.00548858	0.008	0.012	1	ENSMUSG00000027276
Rps19	0.350398	0.0292758	0.897	0.911	1	ENSMUSG00000040952
Stat3	0.363649	-0.0095497	0.644	0.622	1	ENSMUSG00000004040
Arrb1	0.364265	-0.0160823	0.156	0.165	1	ENSMUSG00000018909
Bend6	0.368359	-0.00577393	0.077	0.066	1	ENSMUSG00000042182
Susd5	0.374793	0.0278483	0.904	0.903	1	ENSMUSG00000086596
Mib2	0.37658	3.38195e-05	0.06	0.051	1	ENSMUSG00000029060
Cbfa2t2	0.387251	-0.0215497	0.105	0.113	1	ENSMUSG00000038533
Dtx3	0.38947	-0.0250866	0.338	0.33	1	ENSMUSG00000040415
Nkap	0.415355	-0.0109956	0.273	0.271	1	ENSMUSG00000016409
Egfl7	0.417494	-0.00246749	0.009	0.006	1	ENSMUSG00000026921
Prag1	0.421499	0.00208626	0.017	0.013	1	ENSMUSG00000050271
Pln	0.445777	0.000534675	0.002	0.003	1	ENSMUSG00000038583
Nkapl	0.45096	-0.000992484	0.005	0.007	1	ENSMUSG00000059395
Psenen	0.45293	-0.0226305	0.679	0.664	1	ENSMUSG00000036835
Rcan2	0.465292	-0.0155306	0.026	0.031	1	ENSMUSG00000039601
Pear1	0.466784	-0.00621965	0.009	0.012	1	ENSMUSG00000028073
Heyl	0.482862	-0.00176199	0.005	0.003	1	ENSMUSG00000032744
Neurl1a	0.493146	-0.0027612	0.026	0.022	1	ENSMUSG00000006435
Pdcd10	0.50165	-0.0135244	0.466	0.412	1	ENSMUSG00000027835
Dtx2	0.507093	-0.0121478	0.023	0.028	1	ENSMUSG00000004947
Dll4	0.515489	-0.00470684	0.003	0.004	1	ENSMUSG00000027314
Bmp7	0.528539	-0.00342594	0.362	0.365	1	ENSMUSG00000008999
Psen1	0.550104	-0.0161905	0.298	0.293	1	ENSMUSG00000019969
Gas2	0.569331	-0.00271925	0.008	0.01	1	ENSMUSG00000030498
Dll1	0.576465	0.000973028	0.009	0.007	1	ENSMUSG00000014773
Spen	0.579362	-0.024464	0.249	0.246	1	ENSMUSG00000040761
Tmem100	0.58031	-0.0362388	0.293	0.287	1	ENSMUSG00000069763
Tgfb2	0.581903	-0.0190289	0.622	0.596	1	ENSMUSG00000039239
Hhex	0.5888	-0.000525881	0.001	0.002	1	ENSMUSG00000024986
Notch2	0.599585	0.0134577	0.203	0.189	1	ENSMUSG00000027878
Bcl6	0.606939	0.00297448	0.297	0.274	1	ENSMUSG00000022508
Tspan5	0.625541	-0.0337083	0.079	0.083	1	ENSMUSG00000028152
Hey1	0.631351	-0.000441164	0.014	0.011	1	ENSMUSG00000040289
Il6st	0.635632	-0.0130478	0.405	0.366	1	ENSMUSG00000021756
Synj2bp	0.647629	-0.0237596	0.323	0.308	1	ENSMUSG00000090935
Maml1	0.655859	-0.0167657	0.123	0.125	1	ENSMUSG00000050567
Notch3	0.658042	-0.0167696	0.013	0.015	1	ENSMUSG00000038146
Reck	0.675882	-0.0404073	0.329	0.305	1	ENSMUSG00000028476
Dtx3l	0.689558	0.000980903	0.024	0.022	1	ENSMUSG00000049502
Nepro	0.71974	-0.00954566	0.042	0.045	1	ENSMUSG00000036208
Poglut1	0.730574	-0.0331147	0.252	0.229	1	ENSMUSG00000034064
Robo2	0.747819	-0.00454899	0.003	0.003	1	ENSMUSG00000052516
Ift74	0.762655	-0.0122155	0.255	0.234	1	ENSMUSG00000028576
Llgl1	0.778393	-0.0224896	0.158	0.146	1	ENSMUSG00000020536
Ift172	0.780892	-0.0101355	0.04	0.041	1	ENSMUSG00000038564
Anxa4	0.783096	-0.00542653	0.749	0.708	1	ENSMUSG00000029994
Cdk6	0.78785	0.00335467	0.63	0.597	1	ENSMUSG00000040274
Eya1	0.788012	-0.00185426	0.023	0.025	1	ENSMUSG00000025932
Fbxw7	0.811348	0.0133283	0.167	0.16	1	ENSMUSG00000028086
Dicer1	0.828837	-0.017484	0.178	0.173	1	ENSMUSG00000041415
Tspan14	0.839928	-0.0180795	0.316	0.292	1	ENSMUSG00000037824
S1pr3	0.842877	-0.011739	0.05	0.051	1	ENSMUSG00000067586
Mmp14	0.843674	0.00290052	0.583	0.549	1	ENSMUSG00000000957
Aak1	0.860294	-0.0136762	0.217	0.213	1	ENSMUSG00000057230
Pofut1	0.885028	-0.0143011	0.193	0.183	1	ENSMUSG00000046020
Nle1	0.897661	-0.00645734	0.048	0.046	1	ENSMUSG00000020692
Notch4	0.907685	-0.00574171	0.01	0.01	1	ENSMUSG00000015468
Wdr12	0.920251	-0.0191023	0.281	0.274	1	ENSMUSG00000026019
Fat4	0.932883	0.00103635	0.007	0.007	1	ENSMUSG00000046743
Gdpd5	0.936047	3.77803e-05	0.007	0.007	1	ENSMUSG00000035314
Perp	0.936743	0.00109484	0.006	0.006	1	ENSMUSG00000019851
Hif1an	0.940371	-0.020602	0.162	0.155	1	ENSMUSG00000036450
Tspan15	0.953467	0.0024482	0.004	0.003	1	ENSMUSG00000037031
Dlk1	0.958637	0.000946577	0.003	0.003	1	ENSMUSG00000040856
Psen2	0.964928	-0.0158864	0.128	0.123	1	ENSMUSG00000010609
Dtx4	0.967995	-0.000417203	0.002	0.002	1	ENSMUSG00000039982
Kit	0.977127	-0.000153157	0.001	0.001	1	ENSMUSG00000005672
Grip2	1	0	0	0	1	ENSMUSG00000030098
Nod2	1	0	0	0	1	ENSMUSG00000055994
Cfd	1	0	0	0	1	ENSMUSG00000061780
Trp63	1	0	0	0	1	ENSMUSG00000022510

## Sheet: DE-Osteoblast
gene_name	p_val	avg_log2FC	pct.1	pct.2	p_val_adj	ensembl
App	2.11102e-10	-0.173357	0.97	0.954	4.24061e-06	ENSMUSG00000022892
Hes1	3.74652e-07	0.145393	0.37	0.203	0.007526	ENSMUSG00000022528
Sel1l	3.08048e-06	0.0969677	0.284	0.149	0.0618807	ENSMUSG00000020964
Psenen	6.57365e-06	0.119146	0.612	0.42	0.132052	ENSMUSG00000036835
Slc35c1	3.64662e-05	0.0603754	0.083	0.024	0.732533	ENSMUSG00000049922
Nfkbia	3.99508e-05	0.0846595	0.321	0.19	0.802533	ENSMUSG00000021025
Rcan2	5.55277e-05	0.0919277	0.242	0.132	1	ENSMUSG00000039601
Snai1	6.43137e-05	0.0704751	0.162	0.076	1	ENSMUSG00000042821
Dtx3	0.000107721	0.0632149	0.182	0.091	1	ENSMUSG00000040415
Tbx2	0.000110665	0.10682	0.455	0.303	1	ENSMUSG00000000093
Rfng	0.000118595	0.0674944	0.159	0.076	1	ENSMUSG00000025158
Akt1s1	0.000255889	0.0600229	0.212	0.119	1	ENSMUSG00000011096
Bend6	0.000748577	-0.136492	0.072	0.136	1	ENSMUSG00000042182
Dicer1	0.00107204	0.041241	0.106	0.048	1	ENSMUSG00000041415
Robo1	0.00129551	0.0457193	0.222	0.134	1	ENSMUSG00000022883
Itgb1bp1	0.00249502	0.0326508	0.18	0.106	1	ENSMUSG00000062352
Rps19	0.00257616	0.126068	0.822	0.682	1	ENSMUSG00000040952
Numb	0.00317003	0.0425505	0.118	0.061	1	ENSMUSG00000021224
Ptp4a3	0.00412902	0.0398314	0.145	0.084	1	ENSMUSG00000059895
Snai2	0.00520704	0.0273335	0.148	0.086	1	ENSMUSG00000022676
Kctd10	0.00553323	0.0296419	0.199	0.125	1	ENSMUSG00000001098
Aph1a	0.00756895	0.0182666	0.303	0.21	1	ENSMUSG00000015750
Bmp7	0.00787371	0.0521961	0.212	0.141	1	ENSMUSG00000008999
Epn1	0.00807937	0.00337675	0.238	0.154	1	ENSMUSG00000035203
Ncstn	0.00919155	0.0142781	0.24	0.16	1	ENSMUSG00000003458
Bcl6	0.00934601	0.0372401	0.039	0.013	1	ENSMUSG00000022508
Hp	0.0109414	0.0327109	0.079	0.039	1	ENSMUSG00000031722
Cd46	0.0125355	0.0131912	0.012	0	1	ENSMUSG00000016493
Notch2	0.0210942	0.0248711	0.196	0.136	1	ENSMUSG00000027878
Aph1b	0.0211395	0.0114531	0.109	0.065	1	ENSMUSG00000032375
Galnt11	0.0236926	0.0150323	0.113	0.069	1	ENSMUSG00000038072
Tgfbr2	0.0249797	0.0240267	0.293	0.212	1	ENSMUSG00000032440
Foxc1	0.0253027	0.00195102	0.231	0.16	1	ENSMUSG00000050295
Dtx3l	0.0304315	0.0315949	0.053	0.026	1	ENSMUSG00000049502
Chac1	0.0327534	0.0264707	0.058	0.03	1	ENSMUSG00000027313
Tgfb2	0.0430699	0.0183172	0.023	0.007	1	ENSMUSG00000039239
Rita1	0.0603137	0.0124947	0.028	0.011	1	ENSMUSG00000029600
Maml3	0.0780717	0.0239137	0.118	0.082	1	ENSMUSG00000061143
Zbtb7a	0.0883958	0.0167446	0.268	0.21	1	ENSMUSG00000035011
Maml1	0.0885336	-0.00473661	0.099	0.067	1	ENSMUSG00000050567
Fat4	0.124921	0.00682603	0.018	0.007	1	ENSMUSG00000046743
Cdkn1b	0.125413	-0.028527	0.395	0.305	1	ENSMUSG00000003031
S1pr3	0.134815	-0.0146909	0.573	0.455	1	ENSMUSG00000067586
Robo2	0.135524	-0.0104571	0.409	0.323	1	ENSMUSG00000052516
Stat3	0.143321	-0.0183676	0.386	0.301	1	ENSMUSG00000004040
Notch3	0.145995	-0.02286	0.012	0.024	1	ENSMUSG00000038146
Zmiz1	0.148964	-0.00487142	0.092	0.065	1	ENSMUSG00000007817
Dtx4	0.15054	-0.0157701	0.178	0.136	1	ENSMUSG00000039982
Llgl1	0.154941	-0.0456355	0.127	0.093	1	ENSMUSG00000020536
Spen	0.155433	-0.0454496	0.203	0.156	1	ENSMUSG00000040761
Gdpd5	0.156663	0.0174789	0.025	0.013	1	ENSMUSG00000035314
Dtx2	0.178768	-0.0012387	0.03	0.017	1	ENSMUSG00000004947
Hif1an	0.187137	0.00297712	0.065	0.045	1	ENSMUSG00000036450
Mmp14	0.190932	0.032484	0.762	0.641	1	ENSMUSG00000000957
Epn2	0.194157	-0.00385785	0.06	0.041	1	ENSMUSG00000001036
Ift74	0.200455	-0.0221149	0.132	0.1	1	ENSMUSG00000028576
Perp	0.204829	-0.0105554	0	0.004	1	ENSMUSG00000019851
Tspan15	0.204829	-0.00779864	0	0.004	1	ENSMUSG00000037031
Psen1	0.223659	-0.0276352	0.219	0.173	1	ENSMUSG00000019969
Psen2	0.23078	-0.0210352	0.092	0.069	1	ENSMUSG00000010609
Foxc2	0.244697	-0.0018488	0.023	0.013	1	ENSMUSG00000046714
Hey2	0.26588	0.00259983	0.002	0	1	ENSMUSG00000019789
Cntn1	0.26588	0.00117945	0.002	0	1	ENSMUSG00000055022
Rbm15	0.273344	-0.0332964	0.039	0.054	1	ENSMUSG00000048109
Nkap	0.299467	-0.0937107	0.152	0.169	1	ENSMUSG00000016409
Adam10	0.300117	-0.152016	0.342	0.333	1	ENSMUSG00000054693
Aak1	0.311783	-0.0302783	0.203	0.165	1	ENSMUSG00000057230
Cbfa2t2	0.320793	-0.00540288	0.055	0.041	1	ENSMUSG00000038533
Tgfb1	0.326266	-0.0113407	0.085	0.067	1	ENSMUSG00000002603
Tmem100	0.32703	-0.000169425	0.014	0.007	1	ENSMUSG00000069763
Aph1c	0.33712	0.00331368	0.039	0.028	1	ENSMUSG00000053040
Mib2	0.342732	0.00539388	0.032	0.022	1	ENSMUSG00000029060
Neurl1a	0.35716	-0.0123617	0.032	0.022	1	ENSMUSG00000006435
Adam17	0.362788	-0.0568655	0.178	0.145	1	ENSMUSG00000052593
Dll4	0.370759	-0.00263165	0	0.002	1	ENSMUSG00000027314
Grip2	0.370759	-0.00218848	0	0.002	1	ENSMUSG00000030098
Gas2	0.370759	-0.00339316	0	0.002	1	ENSMUSG00000030498
Mfng	0.370759	-0.00393339	0	0.002	1	ENSMUSG00000018169
Trp63	0.370759	-0.00254214	0	0.002	1	ENSMUSG00000022510
Neurl1b	0.370759	-0.00328667	0	0.002	1	ENSMUSG00000034413
Hhex	0.370759	-0.00600276	0	0.002	1	ENSMUSG00000024986
Pdcd10	0.379837	-0.115481	0.185	0.193	1	ENSMUSG00000027835
Eya1	0.391007	-0.0107095	0.005	0.009	1	ENSMUSG00000025932
Poglut1	0.435545	-0.0305004	0.104	0.086	1	ENSMUSG00000034064
Rbpj	0.440617	-0.100476	0.122	0.132	1	ENSMUSG00000039191
Llgl2	0.44204	0.00201829	0.005	0.002	1	ENSMUSG00000020782
Gata2	0.449326	0.00473799	0.032	0.024	1	ENSMUSG00000015053
Arrdc1	0.484308	-0.0154771	0.025	0.019	1	ENSMUSG00000026972
Tspan5	0.486043	-0.000216523	0.023	0.017	1	ENSMUSG00000028152
Synj2bp	0.486695	-0.0160974	0.187	0.162	1	ENSMUSG00000090935
Arrb1	0.498137	-0.0130572	0.021	0.015	1	ENSMUSG00000018909
Fbxw7	0.53675	-0.0380755	0.09	0.076	1	ENSMUSG00000028086
Sorbs2	0.546275	-0.104696	0.464	0.416	1	ENSMUSG00000031626
Egfl7	0.573952	-0.0140375	0.005	0.007	1	ENSMUSG00000026921
Dll1	0.576265	-0.0127669	0.005	0.007	1	ENSMUSG00000014773
Cebpa	0.578638	-0.0200785	0.021	0.026	1	ENSMUSG00000034957
Tspan14	0.609067	-0.0620002	0.353	0.301	1	ENSMUSG00000037824
Cdk6	0.613246	-0.0184706	0.028	0.022	1	ENSMUSG00000040274
Enho	0.621212	-0.00760103	0.016	0.02	1	ENSMUSG00000028445
Mib1	0.621482	-0.013403	0.185	0.167	1	ENSMUSG00000024294
Bmp2	0.647102	-0.0695044	0.106	0.112	1	ENSMUSG00000027358
Il6st	0.669779	-0.130315	0.252	0.242	1	ENSMUSG00000021756
Reck	0.686251	-0.0615503	0.143	0.126	1	ENSMUSG00000028476
Dner	0.693613	-0.00513793	0.002	0.004	1	ENSMUSG00000036766
Maml2	0.708439	-0.0103015	0.014	0.017	1	ENSMUSG00000031925
Jag2	0.708439	-0.0227224	0.014	0.017	1	ENSMUSG00000002799
Jag1	0.709646	0.00301206	0.014	0.011	1	ENSMUSG00000027276
Nepro	0.712334	-0.00532575	0.014	0.011	1	ENSMUSG00000036208
Notch1	0.740575	-0.00807308	0.012	0.009	1	ENSMUSG00000026923
Bmp2k	0.753657	-0.0690615	0.127	0.128	1	ENSMUSG00000034663
Nle1	0.766032	-0.00410593	0.025	0.022	1	ENSMUSG00000020692
Wdr12	0.771133	-0.0518944	0.099	0.1	1	ENSMUSG00000026019
Pofut1	0.792663	-0.0107813	0.065	0.059	1	ENSMUSG00000046020
Sox9	0.798685	-0.0373795	0.067	0.061	1	ENSMUSG00000000567
Angpt4	0.821407	-0.0576599	0.06	0.061	1	ENSMUSG00000027460
Pear1	0.831564	-0.00578479	0.005	0.004	1	ENSMUSG00000028073
Nkapl	0.832345	-0.010316	0.005	0.006	1	ENSMUSG00000059395
Susd5	0.836694	-0.00771845	0.005	0.006	1	ENSMUSG00000086596
Lfng	0.839364	-0.00498748	0.012	0.013	1	ENSMUSG00000029570
Ift88	0.839519	-0.0179144	0.044	0.041	1	ENSMUSG00000040040
Postn	0.840487	-0.0758435	0.06	0.061	1	ENSMUSG00000027750
Hey1	0.851477	-0.032197	0.048	0.05	1	ENSMUSG00000040289
Zfp423	0.852565	-0.0186504	0.083	0.078	1	ENSMUSG00000045333
Ift172	0.866856	-0.0113289	0.021	0.022	1	ENSMUSG00000038564
Got1	0.874527	-0.0355274	0.042	0.043	1	ENSMUSG00000025190
Nrarp	0.877682	0.00323982	0.002	0.002	1	ENSMUSG00000078202
Anxa4	0.889764	-0.0697171	0.273	0.255	1	ENSMUSG00000029994
Notch4	0.894009	-0.0042085	0.014	0.015	1	ENSMUSG00000015468
Heyl	0.924276	-0.00584933	0.007	0.007	1	ENSMUSG00000032744
Kit	0.961437	-0.00450134	0.012	0.011	1	ENSMUSG00000005672
Slc35c2	0.977324	-0.0366624	0.143	0.138	1	ENSMUSG00000017664
Prag1	0.986243	-0.00343572	0.018	0.019	1	ENSMUSG00000050271
Il2ra	1	0	0	0	1	ENSMUSG00000026770
Foxa2	1	0	0	0	1	ENSMUSG00000037025
Timp4	1	0	0	0	1	ENSMUSG00000030317
Kcna5	1	0	0	0	1	ENSMUSG00000045534
Nrip2	1	0	0	0	1	ENSMUSG00000001520
Nod2	1	0	0	0	1	ENSMUSG00000055994
Xirp1	1	0	0	0	1	ENSMUSG00000079243
Pln	1	0	0	0	1	ENSMUSG00000038583
Cfd	1	0	0	0	1	ENSMUSG00000061780
Hes7	1	0	0	0	1	ENSMUSG00000023781
Dlk1	1	0	0	0	1	ENSMUSG00000040856
Cdh6	1	0	0	0	1	ENSMUSG00000039385
Dlk2	1	0	0	0	1	ENSMUSG00000047428

## Sheet: GO-EC
GOBPID	Pvalue	OddsRatio	ExpCount	Count	Size	Term	padj
GO:0046034	0.00028049	40.4519	0.148714	3	107	ATP metabolic process	0.00953666
GO:1901135	0.000291061	27.5274	0.411397	4	296	carbohydrate derivative metabolic process	0.00989607
GO:0009126	0.000347438	37.4911	0.159833	3	115	purine nucleoside monophosphate metabolic process	0.0118129
GO:0009167	0.000347438	37.4911	0.159833	3	115	purine ribonucleoside monophosphate metabolic process	0.0118129
GO:0009123	0.000356473	37.1504	0.161223	3	116	nucleoside monophosphate metabolic process	0.0121201
GO:0009161	0.000356473	37.1504	0.161223	3	116	ribonucleoside monophosphate metabolic process	0.0121201
GO:0009205	0.000365659	36.8158	0.162613	3	117	purine ribonucleoside triphosphate metabolic process	0.0124324
GO:0009199	0.000374999	36.487	0.164003	3	118	ribonucleoside triphosphate metabolic process	0.01275
GO:0009144	0.000394143	35.8462	0.166782	3	120	purine nucleoside triphosphate metabolic process	0.0134009
GO:0009141	0.000444761	34.3361	0.173732	3	125	nucleoside triphosphate metabolic process	0.0151219
GO:0009150	0.000717534	28.9375	0.204309	3	147	purine ribonucleotide metabolic process	0.0243962
GO:0009259	0.000761463	28.3265	0.208478	3	150	ribonucleotide metabolic process	0.0258897
GO:0006163	0.000791695	27.9329	0.211258	3	152	purine nucleotide metabolic process	0.0269176
GO:0019693	0.000822694	27.5497	0.214038	3	154	ribose phosphate metabolic process	0.0279716
GO:0072521	0.000903602	26.6346	0.220987	3	159	purine-containing compound metabolic process	0.0307225
GO:0009117	0.00132043	23.2191	0.251564	3	181	nucleotide metabolic process	0.0448946
GO:0042773	0.00135239	53.3875	0.0583739	2	42	ATP synthesis coupled electron transport	0.0459812
GO:0006753	0.00136347	22.95	0.254343	3	183	nucleoside phosphate metabolic process	0.0463581
GO:0055086	0.00161638	21.5707	0.269632	3	194	nucleobase-containing small molecule metabolic process	0.0549568
GO:0022904	0.00169269	47.4	0.0653231	2	47	respiratory electron transport chain	0.0575513
GO:0022900	0.00183916	45.3617	0.0681028	2	49	electron transport chain	0.0625313
GO:0006119	0.00206988	42.61	0.0722724	2	52	oxidative phosphorylation	0.070376
GO:0017144	0.00226801	19.0512	0.302988	3	218	drug metabolic process	0.0771123
GO:0051005	0.0027781	862	0.00277971	1	2	negative regulation of lipoprotein lipase activity	0.0944553
GO:0042985	0.00416473	430.9	0.00416956	1	3	negative regulation of amyloid precursor protein biosynthetic process	0.141601
GO:0019637	0.00456666	14.6764	0.386379	3	278	organophosphate metabolic process	0.155266
GO:0045333	0.00521062	26.1111	0.115358	2	83	cellular respiration	0.177161
GO:0042983	0.00554976	287.2	0.00555942	1	4	amyloid precursor protein biosynthetic process	0.188692
GO:0042984	0.00554976	287.2	0.00555942	1	4	regulation of amyloid precursor protein biosynthetic process	0.188692
GO:0071496	0.00650971	23.1868	0.129256	2	93	cellular response to external stimulus	0.22133
GO:0051004	0.00693318	215.35	0.00694927	1	5	regulation of lipoprotein lipase activity	0.235728
GO:0060192	0.00693318	215.35	0.00694927	1	5	negative regulation of lipase activity	0.235728
GO:0015980	0.00824635	20.4272	0.145935	2	105	energy derivation by oxidation of organic compounds	0.280376
GO:0010561	0.00969522	143.5	0.00972898	1	7	negative regulation of glycoprotein biosynthetic process	0.329637

## Sheet: GO-MSC
GOBPID	Pvalue	OddsRatio	ExpCount	Count	Size	Term	padj
GO:0009653	9.31002e-12	3.74828	23.4414	56	851	anatomical structure morphogenesis	5.82807e-09
GO:0051239	2.66257e-11	3.54804	27.0774	60	983	regulation of multicellular organismal process	1.66677e-08
GO:0035295	6.80713e-11	4.45418	11.1836	36	406	tube development	4.26126e-08
GO:0007155	1.85452e-10	4.35787	10.9907	35	399	cell adhesion	1.16093e-07
GO:0022610	2.2902e-10	4.31896	11.0734	35	402	biological adhesion	1.43366e-07
GO:0048646	3.27492e-10	4.3411	10.6326	34	386	anatomical structure formation involved in morphogenesis	2.0501e-07
GO:0072359	4.55638e-10	4.19373	11.3488	35	412	circulatory system development	2.85229e-07
GO:0035239	9.68543e-10	4.42304	9.338	31	339	tube morphogenesis	6.06308e-07
GO:0051094	1.42804e-09	3.79251	13.6902	38	497	positive regulation of developmental process	8.93952e-07
GO:0001503	2.00008e-09	6.05442	4.5175	21	164	ossification	1.25205e-06
GO:0009888	2.12261e-09	3.49066	17.1885	43	624	tissue development	1.32875e-06
GO:0050793	2.12835e-09	3.19864	24.4331	53	887	regulation of developmental process	1.33235e-06
GO:0001944	2.8003e-09	4.5434	8.0709	28	293	vasculature development	1.75299e-06
GO:0051216	2.95793e-09	9.00807	2.2312	15	81	cartilage development	1.85166e-06
GO:0072358	4.12424e-09	4.45374	8.20862	28	298	cardiovascular system development	2.58177e-06
GO:0001568	5.07281e-09	4.53506	7.74035	27	281	blood vessel development	3.17558e-06
GO:2000026	5.73426e-09	3.28801	19.1443	45	695	regulation of multicellular organismal development	3.58965e-06
GO:0032502	1.2431e-08	2.87152	47.4337	78	1722	developmental process	7.78181e-06
GO:0001525	1.30756e-08	5.13333	5.4816	22	199	angiogenesis	8.18535e-06
GO:0048514	2.47365e-08	4.57143	6.69361	24	243	blood vessel morphogenesis	1.54851e-05
GO:0048729	3.40642e-08	4.64873	6.28042	23	228	tissue morphogenesis	2.13242e-05
GO:0032501	4.53155e-08	2.75795	49.6098	79	1801	multicellular organismal process	2.83675e-05
GO:0045597	4.87902e-08	3.73304	10.3572	30	376	positive regulation of cell differentiation	3.05427e-05
GO:0030155	6.54371e-08	4.46541	6.50079	23	236	regulation of cell adhesion	4.09636e-05
GO:0002062	8.26283e-08	10.5714	1.40483	11	51	chondrocyte differentiation	5.17253e-05
GO:0007167	8.97157e-08	3.87938	8.84218	27	321	enzyme linked receptor protein signaling pathway	5.61621e-05
GO:0051240	9.89262e-08	3.11837	16.6101	39	603	positive regulation of multicellular organismal process	6.19278e-05
GO:0060429	1.0099e-07	3.67346	10.0817	29	366	epithelium development	6.322e-05
GO:0007162	1.01657e-07	6.64391	2.86476	15	104	negative regulation of cell adhesion	6.36376e-05
GO:0010941	1.42123e-07	3.06818	16.8304	39	611	regulation of cell death	8.89692e-05
GO:0048731	1.5151e-07	2.63577	36.7735	64	1335	system development	9.48451e-05
GO:0042127	2.41812e-07	3.10963	15.0675	36	547	regulation of cell proliferation	0.000151374
GO:0009887	2.46811e-07	3.66448	9.28291	27	337	animal organ morphogenesis	0.000154504
GO:0061035	2.71671e-07	16.7212	0.716189	8	26	regulation of cartilage development	0.000170066
GO:0048856	2.73827e-07	2.56651	44.6241	72	1620	anatomical structure development	0.000171416
GO:0061448	2.77761e-07	6.0844	3.08512	15	112	connective tissue development	0.000173878
GO:0007275	3.51986e-07	2.54413	41.1533	68	1494	multicellular organism development	0.000220343
GO:0048870	3.94597e-07	3.12433	13.9932	34	508	cell motility	0.000247018
GO:0051674	3.94597e-07	3.12433	13.9932	34	508	localization of cell	0.000247018
GO:0030278	4.09379e-07	6.3624	2.75457	14	100	regulation of ossification	0.000256271
GO:1905330	4.41279e-07	12.1716	1.01919	9	37	regulation of morphogenesis of an epithelium	0.00027624
GO:0008219	4.44808e-07	2.79994	20.494	43	744	cell death	0.00027845
GO:0016477	4.64459e-07	3.14679	13.4148	33	487	cell migration	0.000290751
GO:0007169	4.85277e-07	4.39365	5.61933	20	204	transmembrane receptor protein tyrosine kinase signaling pathway	0.000303784
GO:0007166	5.02072e-07	2.81007	19.8329	42	720	cell surface receptor signaling pathway	0.000314297
GO:0030334	6.39393e-07	3.55369	9.11763	26	331	regulation of cell migration	0.00040026
GO:0048513	7.34136e-07	2.59407	27.1325	51	985	animal organ development	0.000459569
GO:0001649	7.56252e-07	6.55189	2.47911	13	90	osteoblast differentiation	0.000473414
GO:0002009	7.76478e-07	4.43469	5.26123	19	191	morphogenesis of an epithelium	0.000486075
GO:0048584	8.13185e-07	2.83154	17.9598	39	652	positive regulation of response to stimulus	0.000509054
GO:0032330	8.5513e-07	18.6652	0.57846	7	21	regulation of chondrocyte differentiation	0.000535311
GO:0001501	1.07075e-06	4.32971	5.37142	19	195	skeletal system development	0.000670291
GO:0050790	1.09441e-06	2.88952	16.0041	36	581	regulation of catalytic activity	0.000685098
GO:0045595	1.18649e-06	2.81128	17.4915	38	635	regulation of cell differentiation	0.000742745
GO:0006928	1.35204e-06	2.82525	16.858	37	612	movement of cell or subcellular component	0.000846378
GO:2000145	1.42926e-06	3.38584	9.50327	26	345	regulation of cell motility	0.000894714
GO:0008283	1.5686e-06	2.77345	17.6844	38	642	cell proliferation	0.000981945
GO:0050896	1.80144e-06	2.44802	57.4604	83	2086	response to stimulus	0.0011277
GO:0032879	2.16492e-06	2.55075	24.0199	46	872	regulation of localization	0.00135524
GO:0040011	2.20534e-06	2.82433	15.7562	35	572	locomotion	0.00138054
GO:0042221	2.34787e-06	2.42023	32.3387	56	1174	response to chemical	0.00146977
GO:0009719	2.61522e-06	2.96389	13.0842	31	475	response to endogenous stimulus	0.00163713
GO:0050673	3.27944e-06	4.59441	4.2145	16	153	epithelial cell proliferation	0.00205293
GO:0016310	3.38416e-06	2.64361	18.979	39	689	phosphorylation	0.00211848
GO:0048523	3.6428e-06	2.32945	41.6767	66	1513	negative regulation of cellular process	0.0022804
GO:0043067	4.04733e-06	2.77126	15.4531	34	561	regulation of programmed cell death	0.00253363
GO:0048519	4.37742e-06	2.30951	45.6157	70	1656	negative regulation of biological process	0.00274026
GO:0051270	4.84732e-06	3.13992	10.1368	26	368	regulation of cellular component movement	0.00303442
GO:0050900	4.92581e-06	5.91469	2.47911	12	90	leukocyte migration	0.00308356
GO:0040012	5.63627e-06	3.11027	10.2195	26	371	regulation of locomotion	0.0035283
GO:0065009	5.70539e-06	2.51013	21.6785	42	787	regulation of molecular function	0.00357157
GO:0009966	6.31859e-06	2.44456	24.1301	45	876	regulation of signal transduction	0.00395544
GO:0003008	6.87161e-06	3.07151	10.3296	26	375	system process	0.00430163
GO:0022603	7.57816e-06	3.05247	10.3847	26	377	regulation of anatomical structure morphogenesis	0.00474393
GO:1902531	8.92963e-06	2.72569	14.5717	32	529	regulation of intracellular signal transduction	0.00558995
GO:0023051	9.30298e-06	2.3586	26.9122	48	977	regulation of signaling	0.00582367
GO:0060688	9.55336e-06	11.8557	0.798826	7	29	regulation of morphogenesis of a branching structure	0.0059804
GO:0061036	9.91467e-06	26.2515	0.330549	5	12	positive regulation of cartilage development	0.00620658
GO:0042327	1.36378e-05	3.14814	8.78709	23	319	positive regulation of phosphorylation	0.00853724
GO:0060548	1.40461e-05	2.93378	10.7428	26	390	negative regulation of cell death	0.00879284
GO:0061138	1.4921e-05	5.74775	2.31384	11	84	morphogenesis of a branching epithelium	0.00934056
GO:0048583	1.6005e-05	2.25854	30.7961	52	1118	regulation of response to stimulus	0.0100191
GO:0060485	1.65823e-05	5.17017	2.78212	12	101	mesenchyme development	0.0103805
GO:0010646	1.71344e-05	2.3039	26.6643	47	968	regulation of cell communication	0.0107261
GO:0050865	1.8513e-05	4.40952	3.77376	14	137	regulation of cell activation	0.0115891
GO:2000027	1.93824e-05	6.21487	1.95575	10	71	regulation of animal organ morphogenesis	0.0121334
GO:0015988	2.04035e-05	Inf	0.0826372	3	3	energy coupled proton transmembrane transport, against electrochemical gradient	0.0127726
GO:0015990	2.04035e-05	Inf	0.0826372	3	3	electron transport coupled proton transport	0.0127726
GO:0071495	2.06522e-05	2.80694	11.6518	27	423	cellular response to endogenous stimulus	0.0129283
GO:0001934	2.1538e-05	3.1282	8.40145	22	305	positive regulation of protein phosphorylation	0.0134828
GO:0031589	2.18658e-05	4.33689	3.82886	14	139	cell-substrate adhesion	0.013688
GO:0006796	2.19728e-05	2.30214	25.2594	45	917	phosphate-containing compound metabolic process	0.013755
GO:0006950	2.20141e-05	2.24364	29.4188	50	1068	response to stress	0.0137809
GO:0070887	2.2621e-05	2.29884	25.287	45	918	cellular response to chemical stimulus	0.0141608
GO:0012501	2.31556e-05	2.44018	18.979	37	689	programmed cell death	0.0144954
GO:0042981	2.34662e-05	2.57812	15.2603	32	554	regulation of apoptotic process	0.0146899
GO:0071363	2.47269e-05	3.39434	6.63852	19	241	cellular response to growth factor stimulus	0.0154791
GO:0098609	2.63488e-05	3.64861	5.50914	17	200	cell-cell adhesion	0.0164944
GO:0031214	2.67376e-05	6.78106	1.6252	9	59	biomineral tissue development	0.0167377
GO:0006793	2.76799e-05	2.2759	25.4798	45	925	phosphorus metabolic process	0.0173276
GO:0001763	2.90559e-05	5.30368	2.47911	11	90	morphogenesis of a branching structure	0.018189
GO:0008284	3.07515e-05	3.04738	8.59427	22	312	positive regulation of cell proliferation	0.0192504
GO:0000165	3.30305e-05	3.31551	6.77625	19	246	MAPK cascade	0.0206771
GO:0070848	3.30305e-05	3.31551	6.77625	19	246	response to growth factor	0.0206771
GO:0001837	3.52268e-05	6.51719	1.68029	9	61	epithelial to mesenchymal transition	0.022052
GO:0010466	3.52268e-05	6.51719	1.68029	9	61	negative regulation of peptidase activity	0.022052
GO:0022408	3.52268e-05	6.51719	1.68029	9	61	negative regulation of cell-cell adhesion	0.022052
GO:0071772	3.52268e-05	6.51719	1.68029	9	61	response to BMP	0.022052
GO:0071773	3.52268e-05	6.51719	1.68029	9	61	cellular response to BMP stimulus	0.022052
GO:0007568	3.56644e-05	5.73728	2.09347	10	76	aging	0.0223259
GO:0010648	3.5743e-05	2.70869	12.0099	27	436	negative regulation of cell communication	0.0223751
GO:0023057	3.5743e-05	2.70869	12.0099	27	436	negative regulation of signaling	0.0223751
GO:0030500	3.5874e-05	9.30217	0.9641	7	35	regulation of bone mineralization	0.0224571
GO:0051346	3.61627e-05	4.73477	3.00248	12	109	negative regulation of hydrolase activity	0.0226379
GO:0040007	3.81886e-05	2.80026	10.6877	25	388	growth	0.0239061
GO:0045667	4.02635e-05	6.39272	1.70783	9	62	regulation of osteoblast differentiation	0.025205
GO:0043408	4.07132e-05	3.37665	6.28042	18	228	regulation of MAPK cascade	0.0254864
GO:0010562	4.2216e-05	2.9044	9.42064	23	342	positive regulation of phosphorus metabolic process	0.0264272
GO:0045937	4.2216e-05	2.9044	9.42064	23	342	positive regulation of phosphate metabolic process	0.0264272
GO:0060350	4.35253e-05	8.97931	0.991646	7	36	endochondral bone morphogenesis	0.0272469
GO:0043086	4.38046e-05	3.48901	5.72951	17	208	negative regulation of catalytic activity	0.0274217
GO:0030282	4.60871e-05	7.30167	1.34974	8	49	bone mineralization	0.0288505
GO:0002683	4.79882e-05	4.00604	4.10431	14	149	negative regulation of immune system process	0.0300406
GO:0071310	5.03415e-05	2.29862	21.2102	39	770	cellular response to organic substance	0.0315138
GO:0050678	5.13218e-05	4.23394	3.60849	13	131	regulation of epithelial cell proliferation	0.0321274
GO:0023014	5.15771e-05	3.19636	6.99661	19	254	signal transduction by protein phosphorylation	0.0322872
GO:0042060	5.19423e-05	4.54293	3.11267	12	113	wound healing	0.0325159
GO:1901700	5.23627e-05	2.59815	12.974	28	471	response to oxygen-containing compound	0.0327791
GO:0001935	5.36141e-05	7.12615	1.37729	8	50	endothelial cell proliferation	0.0335624
GO:0007154	5.44911e-05	2.08524	40.1341	61	1457	cell communication	0.0341114
GO:0051241	5.86627e-05	2.6674	11.6518	26	423	negative regulation of multicellular organismal process	0.0367229
GO:0060348	5.90003e-05	4.86392	2.67193	11	97	bone development	0.0369342
GO:0010717	6.28591e-05	8.39607	1.04674	7	38	regulation of epithelial to mesenchymal transition	0.0393498
GO:0048705	6.49277e-05	4.80688	2.69948	11	98	skeletal system morphogenesis	0.0406448
GO:0007165	6.52708e-05	2.08304	36.7184	57	1333	signal transduction	0.0408595
GO:0022407	6.74036e-05	4.40874	3.1953	12	116	regulation of cell-cell adhesion	0.0421947
GO:0043549	7.19889e-05	3.2153	6.55588	18	238	regulation of kinase activity	0.0450651
GO:0070167	7.48769e-05	8.13179	1.07428	7	39	regulation of biomineral tissue development	0.0468729
GO:0023052	7.53442e-05	2.05698	39.6107	60	1438	signaling	0.0471655
GO:0043062	7.9794e-05	4.3235	3.2504	12	118	extracellular structure organization	0.0499511
GO:1902533	8.24375e-05	2.90151	8.51163	21	309	positive regulation of intracellular signal transduction	0.0516059
GO:0010647	9.22542e-05	2.43316	14.8471	30	539	positive regulation of cell communication	0.0577511
GO:0010033	9.28223e-05	2.15052	25.8654	44	939	response to organic substance	0.0581068
GO:1900047	9.38906e-05	14.1157	0.495823	5	18	negative regulation of hemostasis	0.0587755
GO:0006915	9.73923e-05	2.29242	18.676	35	678	apoptotic process	0.0609676
GO:1902230	0.000101244	24.2994	0.275457	4	10	negative regulation of intrinsic apoptotic signaling pathway in response to DNA damage	0.0633789
GO:0007610	0.000105192	3.69444	4.40732	14	160	behavior	0.0658504
GO:0023056	0.000105868	2.41165	14.9573	30	543	positive regulation of signaling	0.0662736
GO:0009968	0.000107843	2.60323	11.3764	25	413	negative regulation of signal transduction	0.0675094
GO:0050866	0.000108347	6.36058	1.51501	8	55	negative regulation of cell activation	0.0678251
GO:0060349	0.000108347	6.36058	1.51501	8	55	bone morphogenesis	0.0678251
GO:0097529	0.000108347	6.36058	1.51501	8	55	myeloid leukocyte migration	0.0678251
GO:0022008	0.000109544	2.40632	14.9849	30	544	neurogenesis	0.0685747
GO:0015672	0.00011237	4.49036	2.86476	11	104	monovalent inorganic cation transport	0.0703434
GO:0030336	0.00011237	4.49036	2.86476	11	104	negative regulation of cell migration	0.0703434
GO:0042325	0.000114281	2.46708	13.5525	28	492	regulation of phosphorylation	0.07154
GO:0048762	0.000115716	4.90492	2.39648	10	87	mesenchymal cell differentiation	0.0724382
GO:0030198	0.000122626	4.44154	2.8923	11	105	extracellular matrix organization	0.0767636
GO:0001775	0.000122975	3.06798	6.83134	18	248	cell activation	0.0769822
GO:0044344	0.000133366	9.2306	0.826372	6	30	cellular response to fibroblast growth factor stimulus	0.0834872
GO:0071774	0.000133366	9.2306	0.826372	6	30	response to fibroblast growth factor	0.0834872
GO:0051049	0.00013868	2.36961	15.1777	30	551	regulation of transport	0.0868135
GO:0030335	0.000146052	3.25279	5.70196	16	207	positive regulation of cell migration	0.0914289
GO:0048518	0.00015437	1.97829	50.9596	71	1850	positive regulation of biological process	0.0966354
GO:0030509	0.000159174	5.97474	1.59765	8	58	BMP signaling pathway	0.0996427
GO:0045445	0.000161684	8.85931	0.853917	6	31	myoblast differentiation	0.101214
GO:0097530	0.000161684	8.85931	0.853917	6	31	granulocyte migration	0.101214
GO:0034109	0.000162538	12.2279	0.550914	5	20	homotypic cell-cell adhesion	0.101749
GO:0098868	0.000162538	12.2279	0.550914	5	20	bone growth	0.101749
GO:0010720	0.000163284	3.09662	6.36306	17	231	positive regulation of cell development	0.102215
GO:0048660	0.000166079	5.19782	2.03838	9	74	regulation of smooth muscle cell proliferation	0.103965
GO:2000146	0.000172034	4.25621	3.00248	11	109	negative regulation of cell motility	0.107693
GO:0080134	0.000178494	2.46738	12.4507	26	452	regulation of response to stress	0.111737
GO:0051347	0.000189184	3.31001	5.23369	15	190	positive regulation of transferase activity	0.118429
GO:0065008	0.000190511	2.01477	31.7878	50	1154	regulation of biological quality	0.11926
GO:0009611	0.000193986	3.65778	4.10431	13	149	response to wounding	0.121435
GO:0060346	0.000195894	54.2647	0.137729	3	5	bone trabecula formation	0.122629
GO:0030154	0.000199496	2.00987	31.8429	50	1156	cell differentiation	0.124885
GO:0048659	0.000204383	5.04029	2.09347	9	76	smooth muscle cell proliferation	0.127944
GO:0048608	0.000207487	3.63021	4.13186	13	150	reproductive structure development	0.129887
GO:0046850	0.000208663	11.461	0.57846	5	21	regulation of bone remodeling	0.130623
GO:1990266	0.000208663	11.461	0.57846	5	21	neutrophil migration	0.130623
GO:0048699	0.00021339	2.36382	14.0483	28	510	generation of neurons	0.133582
GO:0048869	0.000213907	1.98941	33.6884	52	1223	cellular developmental process	0.133906
GO:2000147	0.000215424	3.13246	5.89478	16	214	positive regulation of cell motility	0.134855
GO:0001936	0.000222045	6.66132	1.2671	7	46	regulation of endothelial cell proliferation	0.139
GO:0001822	0.000222208	4.48873	2.5893	10	94	kidney development	0.139102
GO:0044342	0.000228621	18.2161	0.330549	4	12	type B pancreatic cell proliferation	0.143117
GO:0048589	0.000230889	2.81363	7.82298	19	284	developmental growth	0.144536
GO:1903035	0.000232491	8.19923	0.909009	6	33	negative regulation of response to wounding	0.145539
GO:0009967	0.000233909	2.38266	13.3872	27	486	positive regulation of signal transduction	0.146427
GO:0008285	0.000234602	2.99341	6.55588	17	238	negative regulation of cell proliferation	0.146861
GO:0061458	0.000236929	3.57627	4.18695	13	152	reproductive system development	0.148317
GO:0048585	0.000251263	2.30619	14.9298	29	542	negative regulation of response to stimulus	0.15729
GO:0051338	0.000252936	2.79117	7.87808	19	286	regulation of transferase activity	0.158338
GO:0051248	0.000260528	2.53181	10.6051	23	385	negative regulation of protein metabolic process	0.16309
GO:0007399	0.000269461	2.17374	18.8413	34	684	nervous system development	0.168682
GO:0051336	0.000276393	2.69608	8.59427	20	312	regulation of hydrolase activity	0.173022
GO:0051272	0.000281127	3.05158	6.03251	16	219	positive regulation of cellular component movement	0.175986
GO:0033674	0.000287788	3.49819	4.26959	13	155	positive regulation of kinase activity	0.180156
GO:0043085	0.000295431	2.55871	9.9991	22	363	positive regulation of catalytic activity	0.18494
GO:0009123	0.000299354	3.96585	3.1953	11	116	nucleoside monophosphate metabolic process	0.187395
GO:0009126	0.000299354	3.96585	3.1953	11	116	purine nucleoside monophosphate metabolic process	0.187395
GO:0009161	0.000299354	3.96585	3.1953	11	116	ribonucleoside monophosphate metabolic process	0.187395
GO:0009167	0.000299354	3.96585	3.1953	11	116	purine ribonucleoside monophosphate metabolic process	0.187395
GO:0043410	0.000306698	3.47289	4.29713	13	156	positive regulation of MAPK cascade	0.191993
GO:0010810	0.000313643	4.28064	2.69948	10	98	regulation of cell-substrate adhesion	0.19634
GO:0072001	0.000313643	4.28064	2.69948	10	98	renal system development	0.19634
GO:0022612	0.000320119	5.32707	1.76293	8	64	gland morphogenesis	0.200395
GO:0050730	0.000333342	4.68473	2.2312	9	81	regulation of peptidyl-tyrosine phosphorylation	0.208672
GO:0001655	0.000347787	3.88987	3.2504	11	118	urogenital system development	0.217715
GO:0060284	0.000372744	2.51066	10.1644	22	369	regulation of cell development	0.233338
GO:0010942	0.000375175	2.77334	7.46489	18	271	positive regulation of cell death	0.234859
GO:0010951	0.000378213	6.036	1.37729	7	50	negative regulation of endopeptidase activity	0.236762
GO:0045785	0.000381622	3.59055	3.82886	12	139	positive regulation of cell adhesion	0.238896
GO:0007507	0.000382379	2.95965	6.19779	16	225	heart development	0.239369
GO:0097435	0.000383109	2.85681	6.83134	17	248	supramolecular fiber organization	0.239826
GO:0002691	0.000383906	36.1681	0.165274	3	6	regulation of cellular extravasation	0.240325
GO:0014745	0.000383906	36.1681	0.165274	3	6	negative regulation of muscle adaptation	0.240325
GO:0043069	0.000390052	2.55601	9.50327	21	345	negative regulation of programmed cell death	0.244173
GO:0003006	0.000391048	3.07144	5.59178	15	203	developmental process involved in reproduction	0.244796
GO:0050769	0.000391048	3.07144	5.59178	15	203	positive regulation of neurogenesis	0.244796
GO:1901701	0.000402209	2.49501	10.2195	22	371	cellular response to oxygen-containing compound	0.251783
GO:0032964	0.000407883	9.64462	0.661097	5	24	collagen biosynthetic process	0.255335
GO:0033555	0.000407883	9.64462	0.661097	5	24	multicellular organismal response to stress	0.255335
GO:0060351	0.000407883	9.64462	0.661097	5	24	cartilage development involved in endochondral bone morphogenesis	0.255335
GO:0001932	0.000418907	2.35415	12.3956	25	450	regulation of protein phosphorylation	0.262236
GO:0006811	0.000421947	2.53906	9.55837	21	347	ion transport	0.264139
GO:0031401	0.000423398	2.43599	10.9632	23	398	positive regulation of protein modification process	0.265047
GO:0009605	0.000430102	2.19538	16.1693	30	587	response to external stimulus	0.269244
GO:0048468	0.00043244	2.10849	19.3096	34	701	cell development	0.270707
GO:0051716	0.000432904	1.87722	48.5356	67	1762	cellular response to stimulus	0.270998
GO:0040017	0.000443891	2.91563	6.28042	16	228	positive regulation of locomotion	0.277876
GO:0045666	0.000443985	3.32824	4.46241	13	162	positive regulation of neuron differentiation	0.277935
GO:0048732	0.000443985	3.32824	4.46241	13	162	gland development	0.277935
GO:0003281	0.000445946	7.13459	1.01919	6	37	ventricular septum development	0.279162
GO:0050767	0.000455378	2.58191	8.92481	20	324	regulation of neurogenesis	0.285067
GO:0051271	0.000464651	3.74612	3.36058	11	122	negative regulation of cellular component movement	0.290872
GO:0033002	0.000470334	4.0457	2.83721	10	103	muscle cell proliferation	0.294429
GO:0003279	0.00048399	5.76502	1.43238	7	52	cardiac septum development	0.302978
GO:0030595	0.00048399	5.76502	1.43238	7	52	leukocyte chemotaxis	0.302978
GO:0007600	0.000487612	4.96725	1.87311	8	68	sensory perception	0.305245
GO:1900046	0.000498721	9.16026	0.688643	5	25	regulation of hemostasis	0.312199
GO:2000106	0.000498721	9.16026	0.688643	5	25	regulation of leukocyte apoptotic process	0.312199
GO:0019693	0.000500067	3.28258	4.5175	13	164	ribose phosphate metabolic process	0.313042
GO:0002376	0.000507481	2.10515	18.676	33	678	immune system process	0.317683
GO:0051250	0.000517775	6.91002	1.04674	6	38	negative regulation of lymphocyte activation	0.324127
GO:0019220	0.000523109	2.21769	14.8196	28	538	regulation of phosphate metabolic process	0.327466
GO:0051174	0.000523109	2.21769	14.8196	28	538	regulation of phosphorus metabolic process	0.327466
GO:0006468	0.000576676	2.17529	15.6735	29	569	protein phosphorylation	0.360999
GO:0045123	0.000591205	13.2388	0.413186	4	15	cellular extravasation	0.370094
GO:0048663	0.000591205	13.2388	0.413186	4	15	neuron fate commitment	0.370094
GO:0048771	0.000594737	4.80475	1.9282	8	70	tissue remodeling	0.372306
GO:1902600	0.000598301	6.69906	1.07428	6	39	proton transmembrane transport	0.374537
GO:0061045	0.000603988	8.72202	0.716189	5	26	negative regulation of wound healing	0.378096
GO:0040013	0.000612842	3.61238	3.47076	11	126	negative regulation of locomotion	0.383639
GO:1901564	0.000618224	1.84868	54.9537	73	1995	organonitrogen compound metabolic process	0.387008
GO:0046034	0.000638346	3.87518	2.94739	10	107	ATP metabolic process	0.399605
GO:0061430	0.000658336	27.1197	0.19282	3	7	bone trabecula morphogenesis	0.412119
GO:1905331	0.000658336	27.1197	0.19282	3	7	negative regulation of morphogenesis of an epithelium	0.412119
GO:0090092	0.000674889	4.2083	2.45157	9	89	regulation of transmembrane receptor protein serine/threonine kinase signaling pathway	0.422481
GO:0045859	0.000686096	2.89391	5.89478	15	214	regulation of protein kinase activity	0.429496
GO:0007596	0.00068823	6.50051	1.10183	6	40	blood coagulation	0.430832
GO:0030510	0.00068823	6.50051	1.10183	6	40	regulation of BMP signaling pathway	0.430832
GO:0045664	0.000693503	2.69598	7.18943	17	261	regulation of neuron differentiation	0.434133
GO:0032268	0.000710322	1.9684	23.9372	39	869	regulation of cellular protein metabolic process	0.444662
GO:0061061	0.000748175	2.76436	6.58343	16	239	muscle structure development	0.468358
GO:0052547	0.000748284	3.51802	3.5534	11	129	regulation of peptidase activity	0.468426
GO:0010751	0.000752717	Inf	0.0550914	2	2	negative regulation of nitric oxide mediated signal transduction	0.471201
GO:0032286	0.000752717	Inf	0.0550914	2	2	central nervous system myelin maintenance	0.471201
GO:0060686	0.000752717	Inf	0.0550914	2	2	negative regulation of prostatic bud formation	0.471201
GO:0061740	0.000752717	Inf	0.0550914	2	2	protein targeting to lysosome involved in chaperone-mediated autophagy	0.471201
GO:0071211	0.000752717	Inf	0.0550914	2	2	protein targeting to vacuole involved in autophagy	0.471201
GO:0090520	0.000752717	Inf	0.0550914	2	2	sphingolipid mediated signaling pathway	0.471201
GO:2000659	0.000752717	Inf	0.0550914	2	2	regulation of interleukin-1-mediated signaling pathway	0.471201
GO:0003197	0.000771594	12.1328	0.440732	4	16	endocardial cushion development	0.483018
GO:0007599	0.000788289	6.3133	1.12937	6	41	hemostasis	0.493469
GO:0051962	0.000793745	2.84885	5.97742	15	217	positive regulation of nervous system development	0.496884
GO:0044093	0.000800844	2.20577	13.6902	26	497	positive regulation of molecular function	0.501328
GO:0043066	0.000815664	2.45129	9.338	20	339	negative regulation of apoptotic process	0.510606
GO:0042773	0.000899232	6.13649	1.15692	6	42	ATP synthesis coupled electron transport	0.562919
GO:0050817	0.000899232	6.13649	1.15692	6	42	coagulation	0.562919
GO:0061041	0.000899232	6.13649	1.15692	6	42	regulation of wound healing	0.562919
GO:0007417	0.000936603	2.61628	7.38225	17	268	central nervous system development	0.586313
GO:0007267	0.000951707	2.32032	10.8806	22	395	cell-cell signaling	0.595769
GO:0009987	0.000968949	3.50438	106.409	117	3863	cellular process	0.606562
GO:0051246	0.000970921	1.9081	26.0032	41	944	regulation of protein metabolic process	0.607796
GO:0003417	0.000987676	11.1969	0.468277	4	17	growth plate cartilage development	0.618285
GO:0030195	0.000987676	11.1969	0.468277	4	17	negative regulation of blood coagulation	0.618285
GO:0050819	0.000987676	11.1969	0.468277	4	17	negative regulation of coagulation	0.618285
GO:1902229	0.000987676	11.1969	0.468277	4	17	regulation of intrinsic apoptotic signaling pathway in response to DNA damage	0.618285
GO:2000107	0.000987676	11.1969	0.468277	4	17	negative regulation of leukocyte apoptotic process	0.618285
GO:0001938	0.00102063	7.62642	0.798826	5	29	positive regulation of endothelial cell proliferation	0.638912
GO:0010812	0.00102063	7.62642	0.798826	5	29	negative regulation of cell-substrate adhesion	0.638912
GO:0006935	0.00102251	3.17661	4.26959	12	155	chemotaxis	0.64009
GO:0032331	0.0010322	21.6908	0.220366	3	8	negative regulation of chondrocyte differentiation	0.646157
GO:0019637	0.00103529	2.51805	8.12599	18	295	organophosphate metabolic process	0.648094
GO:1903034	0.00105227	4.98077	1.6252	7	59	regulation of response to wounding	0.658723
GO:0030182	0.0010723	2.21953	12.4507	24	452	neuron differentiation	0.671259
GO:0044092	0.00107365	2.44631	8.84218	19	321	negative regulation of molecular function	0.672105
GO:0051960	0.00109383	2.38652	9.55837	20	347	regulation of nervous system development	0.684735
GO:0006812	0.00111608	2.65127	6.83134	16	248	cation transport	0.698667
GO:0048522	0.00112928	1.78518	46.1391	63	1675	positive regulation of cellular process	0.706926
GO:0042330	0.00114468	3.13129	4.32468	12	157	taxis	0.716571
GO:0032270	0.00115211	2.11598	14.7921	27	537	positive regulation of cellular protein metabolic process	0.721223
GO:0031324	0.00119385	1.91506	23.7169	38	861	negative regulation of cellular metabolic process	0.747347
GO:0048709	0.00119808	7.31966	0.826372	5	30	oligodendrocyte differentiation	0.749997
GO:0009150	0.00121019	3.10909	4.35222	12	158	purine ribonucleotide metabolic process	0.757576
GO:0009259	0.00121019	3.10909	4.35222	12	158	ribonucleotide metabolic process	0.757576
GO:0043269	0.00121019	3.10909	4.35222	12	158	regulation of ion transport	0.757576
GO:0060326	0.00122914	4.24762	2.14857	8	78	cell chemotaxis	0.769439
GO:0019233	0.00124304	10.3947	0.495823	4	18	sensory perception of pain	0.778145
GO:0032965	0.00124304	10.3947	0.495823	4	18	regulation of collagen biosynthetic process	0.778145
GO:0045620	0.00124304	10.3947	0.495823	4	18	negative regulation of lymphocyte differentiation	0.778145
GO:0071675	0.00124304	10.3947	0.495823	4	18	regulation of mononuclear cell migration	0.778145
GO:0002695	0.00130526	5.66048	1.23956	6	45	negative regulation of leukocyte activation	0.817093
GO:0030162	0.00132345	2.60377	6.94152	16	252	regulation of proteolysis	0.82848
GO:0018108	0.00135702	3.77468	2.69948	9	98	peptidyl-tyrosine phosphorylation	0.849497
GO:0009199	0.00137137	3.4714	3.2504	10	118	ribonucleoside triphosphate metabolic process	0.858479
GO:0009205	0.00137137	3.4714	3.2504	10	118	purine ribonucleoside triphosphate metabolic process	0.858479
GO:0019216	0.00137137	3.4714	3.2504	10	118	regulation of lipid metabolic process	0.858479
GO:0043065	0.00138012	2.59215	6.96907	16	253	positive regulation of apoptotic process	0.863953
GO:0098662	0.00139201	3.23543	3.82886	11	139	inorganic cation transmembrane transport	0.871401
GO:0001656	0.00139738	7.03649	0.853917	5	31	metanephros development	0.874762
GO:0034103	0.00139738	7.03649	0.853917	5	31	regulation of tissue remodeling	0.874762
GO:0016331	0.00141688	4.70577	1.70783	7	62	morphogenesis of embryonic epithelium	0.886966
GO:0046890	0.00141688	4.70577	1.70783	7	62	regulation of lipid biosynthetic process	0.886966
GO:0006163	0.00142567	3.0443	4.43486	12	161	purine nucleotide metabolic process	0.892472
GO:0018212	0.00145864	3.73186	2.72703	9	99	peptidyl-tyrosine modification	0.913109
GO:0043068	0.00149964	2.5692	7.02416	16	255	positive regulation of programmed cell death	0.938773
GO:0010893	0.00151727	18.0714	0.247911	3	9	positive regulation of steroid biosynthetic process	0.949809
GO:0040037	0.00151727	18.0714	0.247911	3	9	negative regulation of fibroblast growth factor receptor signaling pathway	0.949809
GO:0046688	0.00151727	18.0714	0.247911	3	9	response to copper ion	0.949809
GO:0061037	0.00151727	18.0714	0.247911	3	9	negative regulation of cartilage development	0.949809
GO:1902043	0.00151727	18.0714	0.247911	3	9	positive regulation of extrinsic apoptotic signaling pathway via death domain receptors	0.949809
GO:0003416	0.00154129	9.69944	0.523369	4	19	endochondral bone growth	0.964845
GO:0045661	0.00154129	9.69944	0.523369	4	19	regulation of myoblast differentiation	0.964845
GO:0035148	0.00155816	4.62065	1.73538	7	63	tube formation	0.975409
GO:0043491	0.00155816	4.62065	1.73538	7	63	protein kinase B signaling	0.975409
GO:0045766	0.00155816	4.62065	1.73538	7	63	positive regulation of angiogenesis	0.975409
GO:0009144	0.00155922	3.40666	3.30549	10	120	purine nucleoside triphosphate metabolic process	0.97607
GO:0051249	0.0015663	3.68997	2.75457	9	100	regulation of lymphocyte activation	0.980507
GO:0035556	0.0015698	1.91725	21.5408	35	782	intracellular signal transduction	0.982697
GO:0032101	0.0015735	2.64223	6.39061	15	232	regulation of response to external stimulus	0.98501
GO:0022904	0.00164522	5.38183	1.29465	6	47	respiratory electron transport chain	1
GO:0045834	0.00164522	5.38183	1.29465	6	47	positive regulation of lipid metabolic process	1
GO:0002694	0.0016607	3.37516	3.33303	10	121	regulation of leukocyte activation	1
GO:0009628	0.00169856	2.39741	8.48408	18	308	response to abiotic stimulus	1
GO:0010817	0.00175304	3.13438	3.93904	11	143	regulation of hormone levels	1
GO:0045860	0.00175304	3.13438	3.93904	11	143	positive regulation of protein kinase activity	1
GO:0098660	0.00175304	3.13438	3.93904	11	143	inorganic ion transmembrane transport	1
GO:0009141	0.00176749	3.34423	3.36058	10	122	nucleoside triphosphate metabolic process	1
GO:0044281	0.00180793	2.0668	14.4615	26	525	small molecule metabolic process	1
GO:0032269	0.00183965	2.27325	9.97155	20	362	negative regulation of cellular protein metabolic process	1
GO:0043588	0.00184359	3.95977	2.28629	8	83	skin development	1
GO:0030279	0.00186792	6.53083	0.909009	5	33	negative regulation of ossification	1
GO:0060411	0.00186792	6.53083	0.909009	5	33	cardiac septum morphogenesis	1
GO:0071887	0.00186792	6.53083	0.909009	5	33	leukocyte apoptotic process	1
GO:0002685	0.00187355	4.45922	1.79047	7	65	regulation of leukocyte migration	1
GO:0090288	0.00187355	4.45922	1.79047	7	65	negative regulation of cellular response to growth factor stimulus	1
GO:0030168	0.00188597	9.0911	0.550914	4	20	platelet activation	1
GO:0034330	0.00192821	3.56967	2.83721	9	103	cell junction organization	1
GO:0030324	0.00199146	3.90674	2.31384	8	84	lung development	1
GO:0010595	0.00204867	5.12911	1.34974	6	49	positive regulation of endothelial cell migration	1
GO:0022900	0.00204867	5.12911	1.34974	6	49	electron transport chain	1
GO:0045619	0.00204867	5.12911	1.34974	6	49	regulation of lymphocyte differentiation	1
GO:0048661	0.00204867	5.12911	1.34974	6	49	positive regulation of smooth muscle cell proliferation	1
GO:0072521	0.00205429	2.9028	4.62768	12	168	purine-containing compound metabolic process	1
GO:0009117	0.00207041	2.76657	5.26123	13	191	nucleotide metabolic process	1
GO:0051179	0.00209784	1.72286	47.1307	63	1711	localization	1
GO:0007263	0.00212413	15.4862	0.275457	3	10	nitric oxide mediated signal transduction	1
GO:0010757	0.00221735	71.7667	0.0826372	2	3	negative regulation of plasminogen activation	1
GO:0060513	0.00221735	71.7667	0.0826372	2	3	prostatic bud formation	1
GO:0060684	0.00221735	71.7667	0.0826372	2	3	epithelial-mesenchymal cell signaling	1
GO:0060685	0.00221735	71.7667	0.0826372	2	3	regulation of prostatic bud formation	1
GO:0060687	0.00221735	71.7667	0.0826372	2	3	regulation of branching involved in prostate gland morphogenesis	1
GO:0072672	0.00221735	71.7667	0.0826372	2	3	neutrophil extravasation	1
GO:2000389	0.00221735	71.7667	0.0826372	2	3	regulation of neutrophil extravasation	1
GO:2000391	0.00221735	71.7667	0.0826372	2	3	positive regulation of neutrophil extravasation	1
GO:2000833	0.00221735	71.7667	0.0826372	2	3	positive regulation of steroid hormone secretion	1
GO:0021915	0.00223643	4.30855	1.84556	7	67	neural tube development	1
GO:0050679	0.00223643	4.30855	1.84556	7	67	positive regulation of epithelial cell proliferation	1
GO:1901342	0.00225182	3.22583	3.47076	10	126	regulation of vasculature development	1
GO:0034220	0.00227242	2.73451	5.31632	13	193	ion transmembrane transport	1
GO:0071236	0.00227646	5.01136	1.37729	6	50	cellular response to antibiotic	1
GO:0002063	0.00228063	8.55434	0.57846	4	21	chondrocyte development	1
GO:0010712	0.00228063	8.55434	0.57846	4	21	regulation of collagen metabolic process	1
GO:0010718	0.00228063	8.55434	0.57846	4	21	positive regulation of epithelial to mesenchymal transition	1
GO:0045668	0.00228063	8.55434	0.57846	4	21	negative regulation of osteoblast differentiation	1
GO:2001021	0.00228063	8.55434	0.57846	4	21	negative regulation of response to DNA damage stimulus	1
GO:0030323	0.00231523	3.80477	2.36893	8	86	respiratory tube development	1
GO:0051172	0.0023542	1.86267	22.0366	35	800	negative regulation of nitrogen compound metabolic process	1
GO:0045861	0.00235422	3.4568	2.91985	9	106	negative regulation of proteolysis	1
GO:0006753	0.00237937	2.71874	5.34387	13	194	nucleoside phosphate metabolic process	1
GO:0009892	0.00247357	1.80334	26.3613	40	957	negative regulation of metabolic process	1
GO:0043542	0.00249192	3.75572	2.39648	8	87	endothelial cell migration	1
GO:0007178	0.00268111	3.14226	3.5534	10	129	transmembrane receptor protein serine/threonine kinase signaling pathway	1
GO:0098655	0.0027057	2.94961	4.1594	11	151	cation transmembrane transport	1
GO:0006954	0.00276002	2.79125	4.79296	12	174	inflammatory response	1
GO:0003151	0.00277792	5.89468	0.991646	5	36	outflow tract morphogenesis	1
GO:0051897	0.00277792	5.89468	0.991646	5	36	positive regulation of protein kinase B signaling	1
GO:0062014	0.00277792	5.89468	0.991646	5	36	negative regulation of small molecule metabolic process	1
GO:0003231	0.00278879	4.79123	1.43238	6	52	cardiac ventricle development	1
GO:0002686	0.00286229	13.5473	0.303003	3	11	negative regulation of leukocyte migration	1
GO:0040036	0.00286229	13.5473	0.303003	3	11	regulation of fibroblast growth factor receptor signaling pathway	1
GO:0060445	0.00286229	13.5473	0.303003	3	11	branching involved in salivary gland morphogenesis	1
GO:0060536	0.00286229	13.5473	0.303003	3	11	cartilage morphogenesis	1
GO:0003205	0.00287993	4.10048	1.9282	7	70	cardiac chamber development	1
GO:1904018	0.00287993	4.10048	1.9282	7	70	positive regulation of vasculature development	1
GO:0052548	0.00303544	3.31674	3.03003	9	110	regulation of endopeptidase activity	1
GO:0051896	0.00307522	4.68819	1.45992	6	53	regulation of protein kinase B signaling	1
GO:0050789	0.00313417	1.7857	77.5137	92	2814	regulation of biological process	1
GO:0046849	0.00314229	5.70913	1.01919	5	37	bone remodeling	1
GO:0010035	0.00315633	2.88565	4.24204	11	154	response to inorganic substance	1
GO:0032102	0.00322799	3.28345	3.05758	9	111	negative regulation of response to external stimulus	1
GO:0090287	0.00322799	3.28345	3.05758	9	111	regulation of cellular response to growth factor stimulus	1
GO:0048286	0.00323372	7.65031	0.633552	4	23	lung alveolus development	1
GO:0048662	0.00323372	7.65031	0.633552	4	23	negative regulation of smooth muscle cell proliferation	1
GO:0071674	0.00323372	7.65031	0.633552	4	23	mononuclear cell migration	1
GO:0051051	0.00331933	2.86493	4.26959	11	155	negative regulation of transport	1
GO:0000902	0.00335487	2.18716	9.75119	19	354	cell morphogenesis	1
GO:0050877	0.00339343	2.59861	5.56424	13	202	nervous system process	1
GO:0043271	0.00353994	5.53484	1.04674	5	38	negative regulation of ion transport	1
GO:0050954	0.00353994	5.53484	1.04674	5	38	sensory perception of mechanical stimulus	1
GO:1903391	0.00353994	5.53484	1.04674	5	38	regulation of adherens junction organization	1
GO:0006066	0.00354003	3.52799	2.53421	8	92	alcohol metabolic process	1
GO:0035265	0.00354003	3.52799	2.53421	8	92	organ growth	1
GO:0060562	0.00354066	3.01195	3.69113	10	134	epithelial tube morphogenesis	1
GO:0051247	0.00367557	1.92535	16.0041	27	581	positive regulation of protein metabolic process	1
GO:0001838	0.00371341	4.49472	1.51501	6	55	embryonic epithelial tube formation	1
GO:0006119	0.00371341	4.49472	1.51501	6	55	oxidative phosphorylation	1
GO:0050680	0.00371341	4.49472	1.51501	6	55	negative regulation of epithelial cell proliferation	1
GO:0010955	0.00374018	12.0392	0.330549	3	12	negative regulation of protein processing	1
GO:0032462	0.00374018	12.0392	0.330549	3	12	regulation of protein homooligomerization	1
GO:0043647	0.00374018	12.0392	0.330549	3	12	inositol phosphate metabolic process	1
GO:0045940	0.00374018	12.0392	0.330549	3	12	positive regulation of steroid metabolic process	1
GO:0060343	0.00374018	12.0392	0.330549	3	12	trabecula formation	1
GO:1903318	0.00374018	12.0392	0.330549	3	12	negative regulation of protein maturation	1
GO:2001025	0.00374018	12.0392	0.330549	3	12	positive regulation of response to drug	1
GO:0030193	0.00379889	7.2661	0.661097	4	24	regulation of blood coagulation	1
GO:0035272	0.00379889	7.2661	0.661097	4	24	exocrine system development	1
GO:0061383	0.00379889	7.2661	0.661097	4	24	trabecula morphogenesis	1
GO:0072091	0.00379889	7.2661	0.661097	4	24	regulation of stem cell proliferation	1
GO:0045765	0.00386407	3.18736	3.14021	9	114	regulation of angiogenesis	1
GO:0010976	0.00394054	2.96273	3.74622	10	136	positive regulation of neuron projection development	1
GO:0000904	0.00395605	2.37558	7.02416	15	255	cell morphogenesis involved in differentiation	1
GO:0072089	0.00397253	5.37079	1.07428	5	39	stem cell proliferation	1
GO:0110110	0.00397253	5.37079	1.07428	5	39	positive regulation of animal organ morphogenesis	1
GO:1903038	0.00397253	5.37079	1.07428	5	39	negative regulation of leukocyte cell-cell adhesion	1
GO:1904035	0.00397253	5.37079	1.07428	5	39	regulation of epithelial cell apoptotic process	1
GO:0060541	0.00404414	3.44431	2.5893	8	94	respiratory system development	1
GO:0050731	0.00406712	4.40379	1.54256	6	56	positive regulation of peptidyl-tyrosine phosphorylation	1
GO:0072175	0.00406712	4.40379	1.54256	6	56	epithelial tube formation	1
GO:0016485	0.00425746	3.7945	2.06593	7	75	protein processing	1
GO:0050867	0.00425746	3.7945	2.06593	7	75	positive regulation of cell activation	1
GO:0034765	0.00431616	3.40391	2.61684	8	95	regulation of ion transmembrane transport	1
GO:0003149	0.00435472	35.875	0.110183	2	4	membranous septum morphogenesis	1
GO:0003337	0.00435472	35.875	0.110183	2	4	mesenchymal to epithelial transition involved in metanephros morphogenesis	1
GO:0010755	0.00435472	35.875	0.110183	2	4	regulation of plasminogen activation	1
GO:0021542	0.00435472	35.875	0.110183	2	4	dentate gyrus development	1
GO:0021681	0.00435472	35.875	0.110183	2	4	cerebellar granular layer development	1
GO:0032464	0.00435472	35.875	0.110183	2	4	positive regulation of protein homooligomerization	1
GO:0035989	0.00435472	35.875	0.110183	2	4	tendon development	1
GO:0042730	0.00435472	35.875	0.110183	2	4	fibrinolysis	1
GO:0046851	0.00435472	35.875	0.110183	2	4	negative regulation of bone remodeling	1
GO:0051482	0.00435472	35.875	0.110183	2	4	positive regulation of cytosolic calcium ion concentration involved in phospholipase C-activating G protein-coupled signaling pathway	1
GO:0060449	0.00435472	35.875	0.110183	2	4	bud elongation involved in lung branching	1
GO:0060601	0.00435472	35.875	0.110183	2	4	lateral sprouting from an epithelium	1
GO:0060710	0.00435472	35.875	0.110183	2	4	chorio-allantoic fusion	1
GO:0072283	0.00435472	35.875	0.110183	2	4	metanephric renal vesicle morphogenesis	1
GO:0097048	0.00435472	35.875	0.110183	2	4	dendritic cell apoptotic process	1
GO:1903243	0.00435472	35.875	0.110183	2	4	negative regulation of cardiac muscle hypertrophy in response to stress	1
GO:2000668	0.00435472	35.875	0.110183	2	4	regulation of dendritic cell apoptotic process	1
GO:2000669	0.00435472	35.875	0.110183	2	4	negative regulation of dendritic cell apoptotic process	1
GO:2000807	0.00435472	35.875	0.110183	2	4	regulation of synaptic vesicle clustering	1
GO:0030030	0.00437252	2.02005	12.2578	22	445	cell projection organization	1
GO:0008543	0.00442749	6.91848	0.688643	4	25	fibroblast growth factor receptor signaling pathway	1
GO:0031016	0.00442749	6.91848	0.688643	4	25	pancreas development	1
GO:0032835	0.00442749	6.91848	0.688643	4	25	glomerulus development	1
GO:0071621	0.00442749	6.91848	0.688643	4	25	granulocyte chemotaxis	1
GO:0032368	0.00444172	5.21612	1.10183	5	40	regulation of lipid transport	1
GO:0007611	0.00458439	3.73863	2.09347	7	76	learning or memory	1
GO:0051130	0.00459644	1.98143	13.0842	23	475	positive regulation of cellular component organization	1
GO:0043405	0.00460209	3.36443	2.64439	8	96	regulation of MAP kinase activity	1
GO:0044262	0.00460209	3.36443	2.64439	8	96	cellular carbohydrate metabolic process	1
GO:0055086	0.004736	2.48824	5.7846	13	210	nucleobase-containing small molecule metabolic process	1
GO:0003156	0.00476526	10.8328	0.358094	3	13	regulation of animal organ formation	1
GO:0003401	0.00476526	10.8328	0.358094	3	13	axis elongation	1
GO:0006956	0.00476526	10.8328	0.358094	3	13	complement activation	1
GO:0010714	0.00476526	10.8328	0.358094	3	13	positive regulation of collagen metabolic process	1
GO:0010837	0.00476526	10.8328	0.358094	3	13	regulation of keratinocyte proliferation	1
GO:0032967	0.00476526	10.8328	0.358094	3	13	positive regulation of collagen biosynthetic process	1
GO:0033688	0.00476526	10.8328	0.358094	3	13	regulation of osteoblast proliferation	1
GO:0043277	0.00476526	10.8328	0.358094	3	13	apoptotic cell clearance	1
GO:0060669	0.00476526	10.8328	0.358094	3	13	embryonic placenta morphogenesis	1
GO:0070208	0.00476526	10.8328	0.358094	3	13	protein heterotrimerization	1
GO:0110111	0.00476526	10.8328	0.358094	3	13	negative regulation of animal organ morphogenesis	1
GO:1903392	0.00476526	10.8328	0.358094	3	13	negative regulation of adherens junction organization	1
GO:0015980	0.00486088	3.06747	3.2504	9	118	energy derivation by oxidation of organic compounds	1
GO:0001817	0.00493042	2.47507	5.81215	13	211	regulation of cytokine production	1
GO:0001843	0.00494914	5.07004	1.12937	5	41	neural tube closure	1
GO:0019218	0.00494914	5.07004	1.12937	5	41	regulation of steroid metabolic process	1
GO:0060606	0.00494914	5.07004	1.12937	5	41	tube closure	1
GO:0010665	0.00512268	6.60247	0.716189	4	26	regulation of cardiac muscle cell apoptotic process	1
GO:0030850	0.00512268	6.60247	0.716189	4	26	prostate gland development	1
GO:0050818	0.00512268	6.60247	0.716189	4	26	regulation of coagulation	1
GO:2001023	0.00512268	6.60247	0.716189	4	26	regulation of response to drug	1
GO:0009914	0.00521754	3.28811	2.69948	8	98	hormone transport	1
GO:0046879	0.00521754	3.28811	2.69948	8	98	hormone secretion	1
GO:0010605	0.00527879	1.74318	23.9648	36	870	negative regulation of macromolecule metabolic process	1
GO:0055085	0.0053075	2.23042	7.96071	16	289	transmembrane transport	1
GO:0009612	0.00549643	4.93185	1.15692	5	42	response to mechanical stimulus	1
GO:0046660	0.00549643	4.93185	1.15692	5	42	female sex differentiation	1
GO:0090100	0.00549643	4.93185	1.15692	5	42	positive regulation of transmembrane receptor protein serine/threonine kinase signaling pathway	1
GO:0010959	0.00554799	3.2512	2.72703	8	99	regulation of metal ion transport	1
GO:0060560	0.00554799	3.2512	2.72703	8	99	developmental growth involved in morphogenesis	1
GO:0045321	0.00555267	2.43635	5.89478	13	214	leukocyte activation	1
GO:0031346	0.00585762	2.63693	4.60014	11	167	positive regulation of cell projection organization	1
GO:0010659	0.00588747	6.31393	0.743734	4	27	cardiac muscle cell apoptotic process	1
GO:0070613	0.00588747	6.31393	0.743734	4	27	regulation of protein processing	1
GO:0003007	0.00589422	3.2151	2.75457	8	100	heart morphogenesis	1
GO:0030098	0.00589422	3.2151	2.75457	8	100	lymphocyte differentiation	1
GO:0033687	0.00594408	9.84568	0.38564	3	14	osteoblast proliferation	1
GO:0072376	0.00594408	9.84568	0.38564	3	14	protein activation cascade	1
GO:0010975	0.00600151	2.41117	5.94988	13	216	regulation of neuron projection development	1
GO:1903037	0.0060851	3.53043	2.20366	7	80	regulation of leukocyte cell-cell adhesion	1
GO:0090090	0.00608519	4.80094	1.18447	5	43	negative regulation of canonical Wnt signaling pathway	1
GO:0001667	0.00612409	2.6195	4.62768	11	168	ameboidal-type cell migration	1
GO:0070371	0.00625671	3.17978	2.78212	8	101	ERK1 and ERK2 cascade	1
GO:0046903	0.00634905	2.13192	8.84218	17	321	secretion	1
GO:1901615	0.00637677	2.92944	3.38812	9	123	organic hydroxy compound metabolic process	1
GO:0032940	0.00646278	2.17921	8.12599	16	295	secretion by cell	1
GO:0010770	0.00651183	3.4819	2.2312	7	81	positive regulation of cell morphogenesis involved in differentiation	1
GO:0009790	0.00654662	2.00317	11.1285	20	404	embryo development	1
GO:0065007	0.00658355	1.71805	81.0671	94	2943	biological regulation	1
GO:1901888	0.00671702	4.67675	1.21201	5	44	regulation of cell junction assembly	1
GO:0062012	0.00671947	2.90327	3.41567	9	124	regulation of small molecule metabolic process	1
GO:1903317	0.00672481	6.04944	0.77128	4	28	regulation of protein maturation	1
GO:0034332	0.00673564	3.92642	1.70783	6	62	adherens junction organization	1
GO:0071900	0.00682394	2.71767	4.04922	10	147	regulation of protein serine/threonine kinase activity	1
GO:0032989	0.00686405	2.02861	10.4123	19	378	cellular component morphogenesis	1
GO:0048666	0.00686405	2.02861	10.4123	19	378	neuron development	1
GO:0007548	0.00696051	3.43467	2.25875	7	82	sex differentiation	1
GO:0002682	0.00705888	2.02246	10.4398	19	379	regulation of immune system process	1
GO:0006952	0.00705888	2.02246	10.4398	19	379	defense response	1
GO:0002693	0.00712727	23.9111	0.137729	2	5	positive regulation of cellular extravasation	1
GO:0003414	0.00712727	23.9111	0.137729	2	5	chondrocyte morphogenesis involved in endochondral bone morphogenesis	1
GO:0003422	0.00712727	23.9111	0.137729	2	5	growth plate cartilage morphogenesis	1
GO:0003429	0.00712727	23.9111	0.137729	2	5	growth plate cartilage chondrocyte morphogenesis	1
GO:0010616	0.00712727	23.9111	0.137729	2	5	negative regulation of cardiac muscle adaptation	1
GO:0022010	0.00712727	23.9111	0.137729	2	5	central nervous system myelination	1
GO:0031639	0.00712727	23.9111	0.137729	2	5	plasminogen activation	1
GO:0032291	0.00712727	23.9111	0.137729	2	5	axon ensheathment in central nervous system	1
GO:0034104	0.00712727	23.9111	0.137729	2	5	negative regulation of tissue remodeling	1
GO:0038063	0.00712727	23.9111	0.137729	2	5	collagen-activated tyrosine kinase receptor signaling pathway	1
GO:0060572	0.00712727	23.9111	0.137729	2	5	morphogenesis of an epithelial bud	1
GO:0060693	0.00712727	23.9111	0.137729	2	5	regulation of branching involved in salivary gland morphogenesis	1
GO:0061684	0.00712727	23.9111	0.137729	2	5	chaperone-mediated autophagy	1
GO:0072077	0.00712727	23.9111	0.137729	2	5	renal vesicle morphogenesis	1
GO:0072087	0.00712727	23.9111	0.137729	2	5	renal vesicle development	1
GO:0072103	0.00712727	23.9111	0.137729	2	5	glomerulus vasculature morphogenesis	1
GO:0072104	0.00712727	23.9111	0.137729	2	5	glomerular capillary formation	1
GO:0090171	0.00712727	23.9111	0.137729	2	5	chondrocyte morphogenesis	1
GO:0090177	0.00712727	23.9111	0.137729	2	5	establishment of planar polarity involved in neural tube closure	1
GO:0090178	0.00712727	23.9111	0.137729	2	5	regulation of establishment of planar polarity involved in neural tube closure	1
GO:0090179	0.00712727	23.9111	0.137729	2	5	planar cell polarity pathway involved in neural tube closure	1
GO:0097091	0.00712727	23.9111	0.137729	2	5	synaptic vesicle clustering	1
GO:1903242	0.00712727	23.9111	0.137729	2	5	regulation of cardiac muscle hypertrophy in response to stress	1
GO:2000831	0.00712727	23.9111	0.137729	2	5	regulation of steroid hormone secretion	1
GO:0120036	0.00726801	1.94995	12.0099	21	436	plasma membrane bounded cell projection organization	1
GO:0030593	0.0072823	9.02311	0.413186	3	15	neutrophil chemotaxis	1
GO:0031018	0.0072823	9.02311	0.413186	3	15	endocrine pancreas development	1
GO:0031638	0.0072823	9.02311	0.413186	3	15	zymogen activation	1
GO:0043616	0.0072823	9.02311	0.413186	3	15	keratinocyte proliferation	1
GO:0044319	0.0072823	9.02311	0.413186	3	15	wound healing, spreading of cells	1
GO:0090505	0.0072823	9.02311	0.413186	3	15	epiboly involved in wound healing	1
GO:0014020	0.00739349	4.55876	1.23956	5	45	primary neural tube formation	1
GO:0050772	0.00739349	4.55876	1.23956	5	45	positive regulation of axonogenesis	1
GO:0010001	0.00743181	3.38867	2.28629	7	83	glial cell differentiation	1
GO:0044057	0.0074904	2.67729	4.10431	10	149	regulation of system process	1
GO:0002526	0.00763748	5.8061	0.798826	4	29	acute inflammatory response	1
GO:0010662	0.00763748	5.8061	0.798826	4	29	regulation of striated muscle cell apoptotic process	1
GO:0019751	0.00763748	5.8061	0.798826	4	29	polyol metabolic process	1
GO:0030199	0.00763748	5.8061	0.798826	4	29	collagen fibril organization	1
GO:0035282	0.00763748	5.8061	0.798826	4	29	segmentation	1
GO:0046889	0.00763748	5.8061	0.798826	4	29	positive regulation of lipid biosynthetic process	1
GO:0050810	0.00763748	5.8061	0.798826	4	29	regulation of steroid biosynthetic process	1
GO:0046883	0.00792639	3.34387	2.31384	7	84	regulation of hormone secretion	1
GO:0042493	0.00793717	2.24618	6.85888	14	249	response to drug	1
GO:0031175	0.00801942	2.03237	9.80628	18	356	neuron projection development	1
GO:0060840	0.00811614	4.44653	1.2671	5	46	artery development	1
GO:1905952	0.00811614	4.44653	1.2671	5	46	regulation of lipid localization	1
GO:0007159	0.00844491	3.30022	2.34139	7	85	leukocyte cell-cell adhesion	1
GO:0007160	0.00844491	3.30022	2.34139	7	85	cell-matrix adhesion	1
GO:0070661	0.00844491	3.30022	2.34139	7	85	leukocyte proliferation	1
GO:0071214	0.00844491	3.30022	2.34139	7	85	cellular response to abiotic stimulus	1
GO:0104004	0.00844491	3.30022	2.34139	7	85	cellular response to environmental stimulus	1
GO:0010658	0.00862815	5.58149	0.826372	4	30	striated muscle cell apoptotic process	1
GO:0031399	0.00871274	1.80107	16.2244	26	589	regulation of protein modification process	1
GO:1902532	0.0087591	2.37691	5.53669	12	201	negative regulation of intracellular signal transduction	1
GO:0001736	0.00878477	8.32708	0.440732	3	16	establishment of planar polarity	1
GO:0007164	0.00878477	8.32708	0.440732	3	16	establishment of tissue polarity	1
GO:0014888	0.00878477	8.32708	0.440732	3	16	striated muscle adaptation	1
GO:0030501	0.00878477	8.32708	0.440732	3	16	positive regulation of bone mineralization	1
GO:0060512	0.00878477	8.32708	0.440732	3	16	prostate gland morphogenesis	1
GO:0060740	0.00878477	8.32708	0.440732	3	16	prostate gland epithelium morphogenesis	1
GO:0090184	0.00878477	8.32708	0.440732	3	16	positive regulation of kidney development	1
GO:0090504	0.00878477	8.32708	0.440732	3	16	epiboly	1
GO:0097242	0.00878477	8.32708	0.440732	3	16	amyloid-beta clearance	1
GO:1905332	0.00878477	8.32708	0.440732	3	16	positive regulation of morphogenesis of an epithelium	1
GO:0002687	0.00888649	4.33964	1.29465	5	47	positive regulation of leukocyte migration	1
GO:0032963	0.00888649	4.33964	1.29465	5	47	collagen metabolic process	1
GO:0045995	0.00888649	4.33964	1.29465	5	47	regulation of embryonic development	1
GO:1904019	0.00888649	4.33964	1.29465	5	47	epithelial cell apoptotic process	1
GO:0046649	0.00897699	2.4721	4.87559	11	177	lymphocyte activation	1
GO:0010634	0.00910703	3.66121	1.81802	6	66	positive regulation of epithelial cell migration	1
GO:0045333	0.00955646	3.2162	2.39648	7	87	cellular respiration	1
GO:0045833	0.00969938	5.37351	0.853917	4	31	negative regulation of lipid metabolic process	1
GO:0002040	0.00970602	4.23773	1.32219	5	48	sprouting angiogenesis	1
GO:0072006	0.00970602	4.23773	1.32219	5	48	nephron development	1
GO:0072073	0.00970602	4.23773	1.32219	5	48	kidney epithelium development	1
GO:0006909	0.00978282	3.60034	1.84556	6	67	phagocytosis	1
GO:0050920	0.00978282	3.60034	1.84556	6	67	regulation of chemotaxis	1
GO:0072593	0.00979967	2.92236	3.00248	8	109	reactive oxygen species metabolic process	1
GO:0050794	0.00988569	1.60992	73.2441	86	2659	regulation of cellular process	1
GO:0051050	0.00990027	2.02406	9.25536	17	336	positive regulation of transport	1

## Sheet: GO-Chrondrocyte
GOBPID	Pvalue	OddsRatio	ExpCount	Count	Size	Term	padj
GO:1904994	1.20989e-05	99.4429	0.0488223	3	9	regulation of leukocyte adhesion to vascular endothelial cell	0.00150026
GO:1904995	2.8657e-05	Inf	0.0108494	2	2	negative regulation of leukocyte adhesion to vascular endothelial cell	0.00355347
GO:0061756	4.05801e-05	59.6314	0.0705211	3	13	leukocyte adhesion to vascular endothelial cell	0.00503194
GO:0048589	0.000106404	5.78028	1.97459	9	364	developmental growth	0.0131941
GO:0034616	0.000170766	193.472	0.0216988	2	4	response to laminar fluid shear stress	0.021175
GO:0071499	0.000170766	193.472	0.0216988	2	4	cellular response to laminar fluid shear stress	0.021175
GO:0040007	0.000285831	4.60935	2.77202	10	511	growth	0.035443
GO:0010951	0.000288829	14.5189	0.325482	4	60	negative regulation of endopeptidase activity	0.0358148
GO:0007346	0.000401467	6.0419	1.39957	7	258	regulation of mitotic cell cycle	0.0497819
GO:0007096	0.000423996	96.7083	0.0325482	2	6	regulation of exit from mitosis	0.0525755
GO:0002063	0.000439422	23.8011	0.151892	3	28	chondrocyte development	0.0544883
GO:0001667	0.000535495	6.79813	1.04697	6	193	ameboidal-type cell migration	0.0664014
GO:0010466	0.000551454	12.1159	0.385153	4	71	negative regulation of peptidase activity	0.0683803
GO:0071850	0.000591562	77.3556	0.0379729	2	7	mitotic cell cycle arrest	0.0733537
GO:0010633	0.0005962	21.2418	0.168166	3	31	negative regulation of epithelial cell migration	0.0739288
GO:0051271	0.000648034	8.22631	0.710635	5	131	negative regulation of cellular component movement	0.0803562
GO:0040013	0.000821086	7.78537	0.748608	5	138	negative regulation of locomotion	0.101815
GO:0007088	0.000866837	10.6672	0.433976	4	80	regulation of mitotic nuclear division	0.107488
GO:0010564	0.000989124	5.14345	1.62741	7	300	regulation of cell cycle process	0.122651
GO:0001709	0.00100718	55.2381	0.0488223	2	9	cell fate determination	0.12489
GO:0003414	0.00100718	55.2381	0.0488223	2	9	chondrocyte morphogenesis involved in endochondral bone morphogenesis	0.12489
GO:0003422	0.00100718	55.2381	0.0488223	2	9	growth plate cartilage morphogenesis	0.12489
GO:0003429	0.00100718	55.2381	0.0488223	2	9	growth plate cartilage chondrocyte morphogenesis	0.12489
GO:0071498	0.00100718	55.2381	0.0488223	2	9	cellular response to fluid shear stress	0.12489
GO:0090171	0.00100718	55.2381	0.0488223	2	9	chondrocyte morphogenesis	0.12489
GO:0042221	0.00122686	2.94794	8.23469	17	1518	response to chemical	0.152131
GO:0000278	0.00152812	4.25369	2.27295	8	419	mitotic cell cycle	0.189487
GO:0051783	0.0015831	8.98954	0.509921	4	94	regulation of nuclear division	0.196305
GO:0008219	0.00175354	3.11374	5.47894	13	1010	cell death	0.217438
GO:0003418	0.00215254	35.1313	0.0705211	2	13	growth plate cartilage chondrocyte differentiation	0.266915
GO:0016525	0.00215288	13.1848	0.260385	3	48	negative regulation of angiogenesis	0.266957
GO:0070887	0.00241437	2.90216	6.40114	14	1180	cellular response to chemical stimulus	0.299382
GO:2000181	0.00242153	12.6201	0.271235	3	50	negative regulation of blood vessel morphogenesis	0.300269
GO:0006915	0.00246419	3.08762	4.97987	12	918	apoptotic process	0.305559
GO:0003433	0.00250273	32.1991	0.0759458	2	14	chondrocyte development involved in endochondral bone morphogenesis	0.310338
GO:0010458	0.00250273	32.1991	0.0759458	2	14	exit from mitosis	0.310338
GO:0034405	0.00250273	32.1991	0.0759458	2	14	response to fluid shear stress	0.310338
GO:0048841	0.00250273	32.1991	0.0759458	2	14	regulation of axon extension involved in axon guidance	0.310338
GO:1903671	0.00250273	32.1991	0.0759458	2	14	negative regulation of sprouting angiogenesis	0.310338
GO:0030336	0.00281701	7.61487	0.596717	4	110	negative regulation of cell migration	0.34931
GO:0032963	0.00286202	11.8577	0.287509	3	53	collagen metabolic process	0.35489
GO:0048514	0.00286339	4.81753	1.44839	6	267	blood vessel morphogenesis	0.35506
GO:0043537	0.0028779	29.7179	0.0813704	2	15	negative regulation of blood vessel endothelial cell migration	0.35686
GO:0045429	0.0028779	29.7179	0.0813704	2	15	positive regulation of nitric oxide biosynthetic process	0.35686
GO:0048846	0.0028779	29.7179	0.0813704	2	15	axon extension involved in axon guidance	0.35686
GO:0060536	0.0028779	29.7179	0.0813704	2	15	cartilage morphogenesis	0.35686
GO:1902284	0.0028779	29.7179	0.0813704	2	15	neuron projection extension involved in neuron projection guidance	0.35686
GO:1904407	0.0028779	29.7179	0.0813704	2	15	positive regulation of nitric oxide metabolic process	0.35686
GO:0012501	0.00298955	3.00722	5.09379	12	939	programmed cell death	0.370705
GO:0090101	0.00301909	11.6235	0.292934	3	54	negative regulation of transmembrane receptor protein serine/threonine kinase signaling pathway	0.374367
GO:0009888	0.00306564	3.12295	4.42113	11	815	tissue development	0.38014
GO:0001101	0.00310551	7.40205	0.612991	4	113	response to acid chemical	0.385083
GO:1901673	0.00327781	27.5913	0.0867951	2	16	regulation of mitotic spindle assembly	0.406448
GO:1901343	0.00334896	11.1817	0.303783	3	56	negative regulation of vasculature development	0.415271
GO:2000146	0.00341365	7.20063	0.629265	4	116	negative regulation of cell motility	0.423292
GO:0050673	0.00361344	5.46341	1.04697	5	193	epithelial cell proliferation	0.448067
GO:0001503	0.00403178	5.31795	1.07409	5	198	ossification	0.49994
GO:1902667	0.00415074	24.1354	0.0976445	2	18	regulation of axon guidance	0.514692
GO:0030198	0.00433625	6.71275	0.672662	4	124	extracellular matrix organization	0.537695
GO:0051726	0.00439599	3.54044	2.69065	8	496	regulation of cell cycle	0.545103
GO:0048729	0.00453431	4.36411	1.58944	6	293	tissue morphogenesis	0.562254
GO:0140014	0.00459083	6.60077	0.683512	4	126	mitotic nuclear division	0.569263
GO:0003413	0.00462325	22.7124	0.103069	2	19	chondrocyte differentiation involved in endochondral bone morphogenesis	0.573283
GO:0071158	0.00462325	22.7124	0.103069	2	19	positive regulation of cell cycle arrest	0.573283
GO:0035239	0.00487323	3.80802	2.1536	7	397	tube morphogenesis	0.604281
GO:0009653	0.00488652	2.72047	6.13533	13	1131	anatomical structure morphogenesis	0.605929
GO:0001100	0.0054247	Inf	0.0054247	1	1	negative regulation of exit from mitosis	0.672662
GO:0010157	0.0054247	Inf	0.0054247	1	1	response to chlorate	0.672662
GO:0010716	0.0054247	Inf	0.0054247	1	1	negative regulation of extracellular matrix disassembly	0.672662
GO:0014738	0.0054247	Inf	0.0054247	1	1	regulation of muscle hyperplasia	0.672662
GO:0014740	0.0054247	Inf	0.0054247	1	1	negative regulation of muscle hyperplasia	0.672662
GO:0014900	0.0054247	Inf	0.0054247	1	1	muscle hyperplasia	0.672662
GO:0021997	0.0054247	Inf	0.0054247	1	1	neural plate axis specification	0.672662
GO:0032354	0.0054247	Inf	0.0054247	1	1	response to follicle-stimulating hormone	0.672662
GO:0034698	0.0054247	Inf	0.0054247	1	1	response to gonadotropin	0.672662
GO:0034699	0.0054247	Inf	0.0054247	1	1	response to luteinizing hormone	0.672662
GO:0042489	0.0054247	Inf	0.0054247	1	1	negative regulation of odontogenesis of dentin-containing tooth	0.672662
GO:0043152	0.0054247	Inf	0.0054247	1	1	induction of bacterial agglutination	0.672662
GO:0048749	0.0054247	Inf	0.0054247	1	1	compound eye development	0.672662
GO:0061757	0.0054247	Inf	0.0054247	1	1	leukocyte adhesion to arterial endothelial cell	0.672662
GO:1900003	0.0054247	Inf	0.0054247	1	1	regulation of serine-type endopeptidase activity	0.672662
GO:1900004	0.0054247	Inf	0.0054247	1	1	negative regulation of serine-type endopeptidase activity	0.672662
GO:1902362	0.0054247	Inf	0.0054247	1	1	melanocyte apoptotic process	0.672662
GO:1902571	0.0054247	Inf	0.0054247	1	1	regulation of serine-type peptidase activity	0.672662
GO:1902572	0.0054247	Inf	0.0054247	1	1	negative regulation of serine-type peptidase activity	0.672662
GO:1903237	0.0054247	Inf	0.0054247	1	1	negative regulation of leukocyte tethering or rolling	0.672662
GO:1904997	0.0054247	Inf	0.0054247	1	1	regulation of leukocyte adhesion to arterial endothelial cell	0.672662
GO:1904998	0.0054247	Inf	0.0054247	1	1	negative regulation of leukocyte adhesion to arterial endothelial cell	0.672662
GO:2000342	0.0054247	Inf	0.0054247	1	1	negative regulation of chemokine (C-X-C motif) ligand 2 production	0.672662
GO:0090169	0.00563905	20.3158	0.113919	2	21	regulation of spindle assembly	0.699242
GO:1903428	0.00563905	20.3158	0.113919	2	21	positive regulation of reactive oxygen species biosynthetic process	0.699242
GO:0045861	0.00571029	6.18733	0.726909	4	134	negative regulation of proteolysis	0.708076
GO:0052548	0.00571029	6.18733	0.726909	4	134	regulation of endopeptidase activity	0.708076
GO:0001525	0.0059425	4.82776	1.17716	5	217	angiogenesis	0.736869
GO:0010631	0.00601631	6.0918	0.737759	4	136	epithelial cell migration	0.746022
GO:0090130	0.00601631	6.0918	0.737759	4	136	tissue migration	0.746022
GO:0090132	0.00601631	6.0918	0.737759	4	136	epithelium migration	0.746022
GO:0003417	0.00618183	19.2972	0.119343	2	22	growth plate cartilage development	0.766547
GO:0051898	0.00618183	19.2972	0.119343	2	22	negative regulation of protein kinase B signaling	0.766547
GO:0002062	0.00627746	8.82729	0.379729	3	70	chondrocyte differentiation	0.778405
GO:0043062	0.00666091	5.90917	0.759458	4	140	extracellular structure organization	0.825953
GO:0003416	0.00674752	18.3757	0.124768	2	23	endochondral bone growth	0.836693
GO:0010596	0.00674752	18.3757	0.124768	2	23	negative regulation of endothelial cell migration	0.836693
GO:0051346	0.00699982	5.82182	0.770307	4	142	negative regulation of hydrolase activity	0.867978
GO:0007050	0.00705338	8.44531	0.396003	3	73	cell cycle arrest	0.874619
GO:0090288	0.00705338	8.44531	0.396003	3	73	negative regulation of cellular response to growth factor stimulus	0.874619
GO:0007411	0.00732413	8.32515	0.401428	3	74	axon guidance	0.908193
GO:0097485	0.00732413	8.32515	0.401428	3	74	neuron projection guidance	0.908193
GO:0045428	0.00733588	17.5379	0.130193	2	24	regulation of nitric oxide biosynthetic process	0.909649
GO:0098868	0.00733588	17.5379	0.130193	2	24	bone growth	0.909649
GO:0001568	0.00758808	3.89473	1.76845	6	326	blood vessel development	0.940922
GO:0050680	0.00760101	8.20833	0.406852	3	75	negative regulation of epithelial cell proliferation	0.942525
GO:0022408	0.00788403	8.09472	0.412277	3	76	negative regulation of cell-cell adhesion	0.977619
GO:0022407	0.00789685	5.61415	0.79743	4	147	regulation of cell-cell adhesion	0.97921
GO:0042026	0.00794665	16.7729	0.135617	2	25	protein refolding	0.985385
GO:0009266	0.00846864	7.87657	0.423126	3	78	response to temperature stimulus	1
GO:0010712	0.00857959	16.0718	0.141042	2	26	regulation of collagen metabolic process	1
GO:0051085	0.00857959	16.0718	0.141042	2	26	chaperone cofactor-dependent protein refolding	1
GO:0006959	0.00923446	15.4267	0.146467	2	27	humoral immune response	1
GO:0060236	0.00923446	15.4267	0.146467	2	27	regulation of mitotic spindle organization	1
GO:0052547	0.00948493	5.31048	0.840828	4	155	regulation of peptidase activity	1
GO:0006809	0.009911	14.8312	0.151892	2	28	nitric oxide biosynthetic process	1
GO:1903053	0.009911	14.8312	0.151892	2	28	regulation of extracellular matrix organization	1
GO:0001944	0.00991214	3.66593	1.87152	6	345	vasculature development	1

## Sheet: GO-Osteoblast
GOBPID	Pvalue	OddsRatio	ExpCount	Count	Size	Term	padj
GO:0046034	0.000109805	22.8386	0.276634	4	127	ATP metabolic process	0.00922365
GO:0042773	0.000110928	43.5698	0.100198	3	46	ATP synthesis coupled electron transport	0.00931793
GO:0009205	0.000147543	21.0784	0.298416	4	137	purine ribonucleoside triphosphate metabolic process	0.0123937
GO:0009126	0.000151776	20.9168	0.300594	4	138	purine nucleoside monophosphate metabolic process	0.0127492
GO:0009167	0.000151776	20.9168	0.300594	4	138	purine ribonucleoside monophosphate metabolic process	0.0127492
GO:0009199	0.000151776	20.9168	0.300594	4	138	ribonucleoside triphosphate metabolic process	0.0127492
GO:0009161	0.000156097	20.7577	0.302772	4	139	ribonucleoside monophosphate metabolic process	0.0131122
GO:0009123	0.000160507	20.6008	0.30495	4	140	nucleoside monophosphate metabolic process	0.0134826
GO:0009144	0.000160507	20.6008	0.30495	4	140	purine nucleoside triphosphate metabolic process	0.0134826
GO:0022904	0.000169761	37.4175	0.115446	3	53	respiratory electron transport chain	0.0142599
GO:0022900	0.000189663	35.9639	0.119802	3	55	electron transport chain	0.0159317
GO:0009141	0.000193964	19.5644	0.320198	4	147	nucleoside triphosphate metabolic process	0.016293
GO:0006119	0.000258327	32.2047	0.132871	3	61	oxidative phosphorylation	0.0216995
GO:1990868	0.000332131	101.576	0.0283168	2	13	response to chemokine	0.027899
GO:1990869	0.000332131	101.576	0.0283168	2	13	cellular response to chemokine	0.027899
GO:0045637	0.000372493	28.2557	0.150297	3	69	regulation of myeloid cell differentiation	0.0312894
GO:0002682	0.000395784	12.0082	0.723168	5	332	regulation of immune system process	0.0332458
GO:0009150	0.000441566	15.6051	0.396436	4	182	purine ribonucleotide metabolic process	0.0370915
GO:0009259	0.000460419	15.4254	0.400792	4	184	ribonucleotide metabolic process	0.0386752
GO:0006163	0.00048978	15.1632	0.407327	4	187	purine nucleotide metabolic process	0.0411415
GO:0019693	0.000510088	14.9931	0.411683	4	189	ribose phosphate metabolic process	0.0428474
GO:0072521	0.000563508	14.5835	0.422574	4	194	purine-containing compound metabolic process	0.0473346
GO:0009117	0.000939696	12.637	0.483564	4	222	nucleotide metabolic process	0.0789345
GO:0006753	0.00100517	12.399	0.492277	4	226	nucleoside phosphate metabolic process	0.0844343
GO:0045333	0.00110772	19.1057	0.217822	3	100	cellular respiration	0.0930485
GO:0017144	0.00144637	11.1813	0.542376	4	249	drug metabolic process	0.121495
GO:0055086	0.00146821	11.1336	0.544554	4	250	nucleobase-containing small molecule metabolic process	0.123329
GO:1903706	0.00192373	15.6388	0.263564	3	121	regulation of hemopoiesis	0.161593
GO:0006957	0.00217822	Inf	0.00217822	1	1	complement activation, alternative pathway	0.18297
GO:0035906	0.00217822	Inf	0.00217822	1	1	descending aorta development	0.18297
GO:1901834	0.00217822	Inf	0.00217822	1	1	regulation of deadenylation-independent decapping of nuclear-transcribed mRNA	0.18297
GO:1901835	0.00217822	Inf	0.00217822	1	1	positive regulation of deadenylation-independent decapping of nuclear-transcribed mRNA	0.18297
GO:1903237	0.00217822	Inf	0.00217822	1	1	negative regulation of leukocyte tethering or rolling	0.18297
GO:1904246	0.00217822	Inf	0.00217822	1	1	negative regulation of polynucleotide adenylyltransferase activity	0.18297
GO:0015980	0.00221099	14.8639	0.276634	3	127	energy derivation by oxidation of organic compounds	0.185723
GO:0055114	0.00306715	8.99478	0.664356	4	305	oxidation-reduction process	0.257641
GO:0030099	0.00310453	13.1223	0.311485	3	143	myeloid cell differentiation	0.260781
GO:0009612	0.00354193	27.7722	0.0914851	2	42	response to mechanical stimulus	0.297522
GO:0009605	0.0041994	6.77385	1.21327	5	557	response to external stimulus	0.35275
GO:0002692	0.00435212	503.8	0.00435644	1	2	negative regulation of cellular extravasation	0.365578
GO:0031087	0.00435212	503.8	0.00435644	1	2	deadenylation-independent decapping of nuclear-transcribed mRNA	0.365578
GO:0038146	0.00435212	503.8	0.00435644	1	2	chemokine (C-X-C motif) ligand 12 signaling pathway	0.365578
GO:0042268	0.00435212	503.8	0.00435644	1	2	regulation of cytolysis	0.365578
GO:0045085	0.00435212	503.8	0.00435644	1	2	negative regulation of interleukin-2 biosynthetic process	0.365578
GO:0045919	0.00435212	503.8	0.00435644	1	2	positive regulation of cytolysis	0.365578
GO:0090280	0.00435212	503.8	0.00435644	1	2	positive regulation of calcium ion import	0.365578
GO:0097048	0.00435212	503.8	0.00435644	1	2	dendritic cell apoptotic process	0.365578
GO:1903236	0.00435212	503.8	0.00435644	1	2	regulation of leukocyte tethering or rolling	0.365578
GO:1904245	0.00435212	503.8	0.00435644	1	2	regulation of polynucleotide adenylyltransferase activity	0.365578
GO:1904995	0.00435212	503.8	0.00435644	1	2	negative regulation of leukocyte adhesion to vascular endothelial cell	0.365578
GO:2000668	0.00435212	503.8	0.00435644	1	2	regulation of dendritic cell apoptotic process	0.365578
GO:2000669	0.00435212	503.8	0.00435644	1	2	negative regulation of dendritic cell apoptotic process	0.365578
GO:0019637	0.00511507	7.72664	0.764554	4	351	organophosphate metabolic process	0.429666
GO:0006091	0.00523562	10.8062	0.374653	3	172	generation of precursor metabolites and energy	0.439792
GO:0016048	0.00652172	251.85	0.00653465	1	3	detection of temperature stimulus	0.547824
GO:0019835	0.00652172	251.85	0.00653465	1	3	cytolysis	0.547824
GO:0031086	0.00652172	251.85	0.00653465	1	3	nuclear-transcribed mRNA catabolic process, deadenylation-independent decay	0.547824
GO:0033603	0.00652172	251.85	0.00653465	1	3	positive regulation of dopamine secretion	0.547824
GO:0035905	0.00652172	251.85	0.00653465	1	3	ascending aorta development	0.547824
GO:0042094	0.00652172	251.85	0.00653465	1	3	interleukin-2 biosynthetic process	0.547824
GO:0045076	0.00652172	251.85	0.00653465	1	3	regulation of interleukin-2 biosynthetic process	0.547824
GO:0048251	0.00652172	251.85	0.00653465	1	3	elastic fiber assembly	0.547824
GO:0050961	0.00652172	251.85	0.00653465	1	3	detection of temperature stimulus involved in sensory perception	0.547824
GO:0050965	0.00652172	251.85	0.00653465	1	3	detection of temperature stimulus involved in sensory perception of pain	0.547824
GO:1904580	0.00652172	251.85	0.00653465	1	3	regulation of intracellular mRNA localization	0.547824
GO:1904582	0.00652172	251.85	0.00653465	1	3	positive regulation of intracellular mRNA localization	0.547824
GO:1901135	0.00693246	7.04611	0.832079	4	382	carbohydrate derivative metabolic process	0.582327
GO:0002376	0.00705237	5.91774	1.36574	5	627	immune system process	0.592399
GO:0008354	0.00868702	167.867	0.00871287	1	4	germ cell migration	0.729709
GO:0014046	0.00868702	167.867	0.00871287	1	4	dopamine secretion	0.729709
GO:0014059	0.00868702	167.867	0.00871287	1	4	regulation of dopamine secretion	0.729709
GO:0018057	0.00868702	167.867	0.00871287	1	4	peptidyl-lysine oxidation	0.729709
GO:0033605	0.00868702	167.867	0.00871287	1	4	positive regulation of catecholamine secretion	0.729709
GO:0050951	0.00868702	167.867	0.00871287	1	4	sensory perception of temperature stimulus	0.729709
GO:0050966	0.00868702	167.867	0.00871287	1	4	detection of mechanical stimulus involved in sensory perception of pain	0.729709
GO:0090026	0.00868702	167.867	0.00871287	1	4	positive regulation of monocyte chemotaxis	0.729709
GO:0097011	0.00868702	167.867	0.00871287	1	4	cellular response to granulocyte macrophage colony-stimulating factor stimulus	0.729709
GO:0097278	0.00868702	167.867	0.00871287	1	4	complement-dependent cytotoxicity	0.729709
GO:0097283	0.00868702	167.867	0.00871287	1	4	keratinocyte apoptotic process	0.729709
GO:1901741	0.00868702	167.867	0.00871287	1	4	positive regulation of myoblast fusion	0.729709
GO:1902172	0.00868702	167.867	0.00871287	1	4	regulation of keratinocyte apoptotic process	0.729709
GO:1903659	0.00868702	167.867	0.00871287	1	4	regulation of complement-dependent cytotoxicity	0.729709
GO:0032101	0.00901132	8.79794	0.455248	3	209	regulation of response to external stimulus	0.756951
GO:0060326	0.00908579	16.7441	0.148119	2	68	cell chemotaxis	0.763207
