# Supplementary material for: Induction of osteogenesis by bone-targeted Notch activation
Source: eLife. 2022 Feb 4;11:e60183. doi: 10.7554/eLife.60183 (PMC8880996; doi:10.7554/eLife.60183)
Supplement: Figure 8—source data 1. [file elife-60183-fig8-data1.xlsx]

## Sheet: Summary
Figure 8-source data 1
F-H	Software	Seurat (4.0.4)
	Method	FindMarkers
	Parameters	assay='RNA'
		logfc.threshold=0.0
		test.use='wilcox'
		min.pct=0.0
		min.cells.feature=0
		min.cells.group=0
	Statistical Test	Wilcoxon Rank Sum
	Multiple testing correction	Bonferroni
	Columns
	gene_name	Gene symbol
	p_val	Wilcoxon Rank Sum P-value
	avg_log2FC	Average log2-fold change Dll4(E12) / Control
	pct.1	Fraction of cells expressing gene in Dll4(E12)
	pct.2	Fraction of cells expressing gene in control
	p_val_adj	Bonferroni adjusted P-value
	ensembl	Ensembl gene ID
	Excluded from plot	Mitochondrial genes (mt-)
		Pseudo genes (Gm*)

## Sheet: EC
gene_name	p_val	avg_log2FC	pct.1	pct.2	p_val_adj	ensembl
Rnu3b1.1	7.81527e-30	-0.476242	0.16	0.401	1.56993e-25	ENSMUST00000183812
Rnu3b1	1.54915e-28	-0.457537	0.158	0.394	3.11193e-24	ENSMUSG00000098943
mt-Nd4l	9.05961e-26	-0.21965	0.951	0.98	1.81989e-21	ENSMUSG00000065947
mt-Atp8	1.33651e-24	-0.228065	0.911	0.937	2.68479e-20	ENSMUSG00000064356
Gm10222	1.61213e-22	-0.206889	0.94	0.97	3.23845e-18	ENSMUSG00000067736
Gm29216	5.50786e-22	0.0566302	0.324	0.133	1.10642e-17	ENSMUSG00000101249
mt-Nd5	1.97237e-20	-0.199972	0.936	0.959	3.96209e-16	ENSMUSG00000064367
Gm42418	6.64633e-19	-0.186688	0.92	0.943	1.33511e-14	ENSMUSG00000098178
Piezo2	7.23356e-18	0.243634	0.18	0.049	1.45308e-13	ENSMUSG00000041482
Itm2b	9.63042e-18	-0.147566	0.974	0.984	1.93456e-13	ENSMUSG00000022108
Rnu1a1	8.3087e-17	-0.222785	0.042	0.173	1.66905e-12	ENSMUSG00000095969
Angptl4	9.88394e-17	0.297815	0.231	0.086	1.98549e-12	ENSMUSG00000002289
Gm26244	1.69839e-16	-0.191754	0.03	0.153	3.41173e-12	ENSMUSG00000095616
Gm24924	1.16726e-15	-0.195751	0.036	0.157	2.3448e-11	ENSMUSG00000094306
Gm26316	9.64282e-15	-0.190848	0.074	0.209	1.93705e-10	ENSMUSG00000065820
Gm23849	9.64282e-15	-0.190848	0.074	0.209	1.93705e-10	ENSMUSG00000065767
mt-Co1	1.89329e-14	-0.114114	0.996	0.997	3.80324e-10	ENSMUSG00000064351
Lalba	3.25007e-14	0.245522	0.203	0.077	6.52875e-10	ENSMUSG00000022991
Npnt	6.15855e-14	0.306632	0.531	0.337	1.23713e-09	ENSMUSG00000040998
Ptma	7.37056e-14	-0.117419	0.971	0.975	1.4806e-09	ENSMUSG00000026238
H3f3a	8.24789e-14	-0.225772	0.737	0.811	1.65684e-09	ENSMUSG00000060743
Gm23472	1.7097e-13	-0.16616	0.065	0.187	3.43445e-09	ENSMUSG00000094050
Gm24497	1.7097e-13	-0.16616	0.065	0.187	3.43445e-09	ENSMUSG00000093956
mt-Cytb	7.13005e-13	-0.104557	0.997	0.998	1.43228e-08	ENSMUSG00000064370
Ttyh3	9.70949e-13	0.260588	0.367	0.202	1.95044e-08	ENSMUSG00000036565
Lgals1	1.7919e-12	0.22713	0.284	0.137	3.59957e-08	ENSMUSG00000068220
mt-Nd2	2.08301e-12	-0.0988983	0.997	0.998	4.18434e-08	ENSMUSG00000064345
Ly6e	2.30778e-12	-0.116995	0.965	0.967	4.63586e-08	ENSMUSG00000022587
Aplnr	5.88844e-12	0.289054	0.43	0.262	1.18287e-07	ENSMUSG00000044338
Col2a1	2.49047e-11	0.243269	0.451	0.268	5.00286e-07	ENSMUSG00000022483
mt-Rnr1	3.4297e-11	-0.12163	0.972	0.975	6.88959e-07	ENSMUSG00000064337
Rps29	3.59327e-11	-0.121846	0.933	0.94	7.21815e-07	ENSMUSG00000034892
Fam198b	5.73748e-11	0.170326	0.199	0.086	1.15255e-06	ENSMUSG00000027955
Timp3	7.13341e-11	-0.194417	0.81	0.842	1.43296e-06	ENSMUSG00000020044
Prss34	1.31981e-10	-0.164391	0.003	0.065	2.65123e-06	ENSMUSG00000056399
mt-Nd4	1.38974e-10	-0.091541	0.997	0.998	2.79171e-06	ENSMUSG00000064363
Gm28437	1.83867e-10	-0.1344	0.968	0.974	3.69352e-06	ENSMUSG00000101111
Hba-a1	1.97569e-10	-0.232866	0.048	0.144	3.96876e-06	ENSMUSG00000069919
Pqlc1	3.21684e-10	0.164629	0.241	0.118	6.46199e-06	ENSMUSG00000034006
Fscn1	3.57487e-10	0.257315	0.504	0.343	7.18119e-06	ENSMUSG00000029581
mt-Co3	3.64041e-10	-0.0995406	0.98	0.987	7.31285e-06	ENSMUSG00000064358
mt-Co2	1.27127e-09	-0.0845147	0.997	0.999	2.55372e-05	ENSMUSG00000064354
Msr1	1.4167e-09	-0.135757	0	0.052	2.84587e-05	ENSMUSG00000025044
Rps28	1.43961e-09	-0.151887	0.849	0.852	2.89189e-05	ENSMUSG00000067288
Nid2	1.51944e-09	0.193486	0.209	0.101	3.05225e-05	ENSMUSG00000021806
Tmem86a	2.01556e-09	0.180949	0.242	0.126	4.04885e-05	ENSMUSG00000010307
Rpl4	2.53731e-09	-0.166733	0.756	0.793	5.09695e-05	ENSMUSG00000032399
Lrg1	2.75038e-09	-0.225137	0.634	0.723	5.52496e-05	ENSMUSG00000037095
Gm10925	3.15071e-09	-0.089374	0.996	0.995	6.32915e-05	ENSMUSG00000100862
Tpt1	3.37891e-09	-0.0943156	0.974	0.983	6.78756e-05	ENSMUSG00000060126
Stc1	3.95711e-09	-0.315724	0.129	0.235	7.94905e-05	ENSMUSG00000014813
H1f0	5.31627e-09	0.209497	0.493	0.334	0.000106793	ENSMUSG00000096210
Ptprb	5.85817e-09	-0.159199	0.856	0.894	0.000117679	ENSMUSG00000020154
Cyr61	6.27028e-09	0.188096	0.21	0.105	0.000125957	ENSMUSG00000028195
mt-Atp6	6.33463e-09	-0.0777634	0.997	0.995	0.00012725	ENSMUSG00000064357
Rsad2	6.43508e-09	0.205988	0.332	0.198	0.000129268	ENSMUSG00000020641
mt-Rnr2	8.85582e-09	-0.0983498	0.994	0.992	0.000177896	ENSMUSG00000064339
Calm1	1.42211e-08	-0.123264	0.919	0.933	0.000285674	ENSMUSG00000001175
Dhrs3	1.58308e-08	0.180982	0.43	0.279	0.00031801	ENSMUSG00000066026
App	1.68902e-08	-0.107417	0.958	0.953	0.000339291	ENSMUSG00000022892
Lamb1	1.73339e-08	0.174735	0.232	0.123	0.000348203	ENSMUSG00000002900
Rps12-ps3	2.488e-08	-0.185632	0.74	0.806	0.00049979	ENSMUSG00000067038
Tmsb4x	2.50078e-08	-0.0835918	0.987	0.995	0.000502356	ENSMUSG00000049775
Prcp	2.72397e-08	0.208082	0.466	0.314	0.000547191	ENSMUSG00000061119
Cdc42	3.25236e-08	-0.126169	0.821	0.834	0.000653334	ENSMUSG00000006699
Hba-a2	3.28626e-08	-0.168745	0.042	0.119	0.000660144	ENSMUSG00000069917
Rps8	4.05147e-08	-0.10289	0.935	0.94	0.00081386	ENSMUSG00000047675
Gm28661	4.43441e-08	-0.149888	0.997	0.999	0.000890784	ENSMUSG00000102070
Plau	4.82657e-08	0.212309	0.282	0.167	0.000969561	ENSMUSG00000021822
Pald1	4.84703e-08	0.132701	0.165	0.078	0.000973672	ENSMUSG00000020092
Raph1	5.0513e-08	0.194859	0.271	0.16	0.00101471	ENSMUSG00000026014
Dusp1	5.56699e-08	0.206326	0.463	0.324	0.0011183	ENSMUSG00000024190
Ly6a	6.40597e-08	-0.177056	0.795	0.854	0.00128683	ENSMUSG00000075602
B2m	6.44223e-08	-0.0893296	0.956	0.962	0.00129411	ENSMUSG00000060802
Pcdhgb2	7.1352e-08	0.0469296	0.649	0.5	0.00143332	ENSMUSG00000102748
Pcdhga1	7.36626e-08	0.05207	0.647	0.498	0.00147973	ENSMUSG00000103144
Cd276	9.30306e-08	0.0925021	0.074	0.02	0.0018688	ENSMUSG00000035914
Col4a2	9.74313e-08	0.203371	0.785	0.634	0.0019572	ENSMUSG00000031503
Pcdhga4	1.13683e-07	0.0468812	0.646	0.498	0.00228367	ENSMUSG00000103677
Grn	1.16429e-07	0.183293	0.646	0.483	0.00233883	ENSMUSG00000034708
Id3	1.21871e-07	-0.158692	0.731	0.755	0.00244815	ENSMUSG00000007872
Pcdhgc4	1.23535e-07	0.0520121	0.644	0.497	0.00248158	ENSMUSG00000023036
Cotl1	1.24667e-07	0.137976	0.219	0.119	0.0025043	ENSMUSG00000031827
Pcdhga5	1.35552e-07	0.0486386	0.643	0.496	0.00272297	ENSMUSG00000103567
Pcdhgb7	1.35552e-07	0.0486386	0.643	0.496	0.00272297	ENSMUSG00000104063
Clic1	1.39536e-07	0.171906	0.454	0.312	0.002803	ENSMUSG00000007041
Pim3	1.48316e-07	0.213917	0.377	0.252	0.00297937	ENSMUSG00000035828
Pcdhga10	1.72513e-07	0.047488	0.644	0.498	0.00346545	ENSMUSG00000102222
Ybx1	1.82192e-07	-0.149502	0.791	0.809	0.00365987	ENSMUSG00000028639
Pcdhgc5	1.88638e-07	0.0472129	0.643	0.497	0.00378935	ENSMUSG00000102543
Pcdhga8	1.88965e-07	0.0469703	0.643	0.497	0.00379593	ENSMUSG00000103897
Pcdhgb6	1.88965e-07	0.0469703	0.643	0.497	0.00379593	ENSMUSG00000103088
Pcdhga3	1.89403e-07	0.0460444	0.643	0.497	0.00380472	ENSMUSG00000104346
Pcdhga12	2.21194e-07	0.0441899	0.646	0.5	0.00444334	ENSMUSG00000102428
Tm4sf1	2.28615e-07	-0.181391	0.806	0.842	0.00459241	ENSMUSG00000027800
Eef1a1	2.54386e-07	-0.0767742	0.959	0.976	0.00511011	ENSMUSG00000037742
Pcdhga7	2.63031e-07	0.0445302	0.643	0.498	0.00528377	ENSMUSG00000103472
Pcdhga6	2.63633e-07	0.0441362	0.643	0.498	0.00529586	ENSMUSG00000103793
Fbln5	2.6472e-07	-0.325978	0.38	0.473	0.00531769	ENSMUSG00000021186
Eva1b	3.0509e-07	0.141035	0.222	0.123	0.00612865	ENSMUSG00000050212
Plpp3	3.35303e-07	-0.119205	0.824	0.829	0.00673556	ENSMUSG00000028517
Rps24	3.43899e-07	-0.0950275	0.907	0.908	0.00690823	ENSMUSG00000025290
Pcdhga11	3.64523e-07	0.0408656	0.643	0.499	0.00732253	ENSMUSG00000102742
Tnk2	3.70872e-07	0.130775	0.187	0.098	0.00745008	ENSMUSG00000022791
Fosb	3.97102e-07	0.224363	0.312	0.203	0.00797699	ENSMUSG00000003545
Lpar6	4.00813e-07	0.192792	0.591	0.437	0.00805154	ENSMUSG00000033446
Col10a1	4.2097e-07	0.106066	0.106	0.041	0.00845646	ENSMUSG00000039462
Fbln2	4.9588e-07	-0.288359	0.383	0.482	0.00996123	ENSMUSG00000064080
Actg1	6.65813e-07	-0.105459	0.945	0.968	0.0133749	ENSMUSG00000062825
Gm10825	7.02397e-07	0.0255393	0.025	0	0.0141098	ENSMUSG00000096937
Rps27	7.5667e-07	-0.103157	0.89	0.907	0.0152	ENSMUSG00000090733
Lrrc55	7.66092e-07	0.0817173	0.073	0.022	0.0153892	ENSMUSG00000075224
Hist1h1c	7.91823e-07	0.12463	0.17	0.088	0.0159061	ENSMUSG00000036181
Pcdhgb5	8.50046e-07	0.0306421	0.644	0.503	0.0170757	ENSMUSG00000103749
Lfng	9.9093e-07	0.172807	0.324	0.212	0.0199058	ENSMUSG00000029570
mt-Nd1	9.92063e-07	-0.0590027	0.997	0.996	0.0199286	ENSMUSG00000064341
Pcdh17	1.04233e-06	0.147669	0.274	0.17	0.0209382	ENSMUSG00000035566
Ctsa	1.16219e-06	0.145051	0.328	0.21	0.0233461	ENSMUSG00000017760
Prss23	1.24177e-06	0.125716	0.165	0.085	0.0249446	ENSMUSG00000039405
Pcdhgc3	1.28266e-06	0.0357011	0.643	0.503	0.0257661	ENSMUSG00000102918
Gm26581	1.50081e-06	0.0192398	0.023	0	0.0301482	ENSMUSG00000097108
Picalm	1.52664e-06	-0.158532	0.711	0.72	0.0306672	ENSMUSG00000039361
Selenoh	1.55949e-06	0.107806	0.142	0.069	0.0313269	ENSMUSG00000076437
Mxra8	1.59833e-06	0.153941	0.401	0.271	0.0321073	ENSMUSG00000029070
Epor	1.62165e-06	0.123237	0.164	0.086	0.0325757	ENSMUSG00000006235
Ecm1	1.69464e-06	0.111984	0.126	0.058	0.0340418	ENSMUSG00000028108
Pxdn	1.77112e-06	0.140964	0.311	0.199	0.0355783	ENSMUSG00000020674
Frmd8	1.78869e-06	0.100596	0.118	0.053	0.0359312	ENSMUSG00000024816
Ddx5	1.80517e-06	-0.101878	0.846	0.842	0.0362623	ENSMUSG00000020719
Ppbp	1.85612e-06	-0.0929259	0.003	0.039	0.0372858	ENSMUSG00000029372
Syt15	2.25137e-06	-0.193248	0.078	0.154	0.0452254	ENSMUSG00000041479
Dysf	2.28522e-06	0.13807	0.283	0.176	0.0459055	ENSMUSG00000033788
Dcaf8	2.29e-06	0.122656	0.283	0.176	0.0460015	ENSMUSG00000026554
Trim25	2.46522e-06	0.153858	0.255	0.158	0.0495213	ENSMUSG00000000275
Grb10	2.65418e-06	0.184208	0.383	0.259	0.0533172	ENSMUSG00000020176
Gna12	2.67877e-06	0.132986	0.338	0.222	0.0538112	ENSMUSG00000000149
Ppia	2.68977e-06	-0.105345	0.903	0.914	0.054032	ENSMUSG00000071866
Wipf3	2.71541e-06	-0.0793627	0	0.031	0.0545472	ENSMUSG00000086040
Pcdhgb4	2.89403e-06	0.0385943	0.628	0.495	0.0581354	ENSMUSG00000103585
Sox4	2.99004e-06	0.165099	0.356	0.242	0.060064	ENSMUSG00000076431
Rps4x	3.03359e-06	-0.107827	0.843	0.84	0.0609387	ENSMUSG00000031320
Pcdhga9	3.10863e-06	0.0394336	0.627	0.494	0.0624462	ENSMUSG00000102440
Pcdhgb8	3.10863e-06	0.0394336	0.627	0.494	0.0624462	ENSMUSG00000103081
Emilin1	3.231e-06	0.12331	0.17	0.09	0.0649043	ENSMUSG00000029163
Gm15500	3.80758e-06	-0.11478	0.807	0.822	0.0764866	ENSMUSG00000086583
Tor1aip2	3.95225e-06	0.151789	0.295	0.19	0.0793927	ENSMUSG00000050565
Srp72	4.04701e-06	0.117282	0.3	0.191	0.0812964	ENSMUSG00000036323
Pcdhga2	4.17855e-06	0.0364126	0.627	0.495	0.0839388	ENSMUSG00000103332
Ndufa8	4.74806e-06	0.109425	0.367	0.241	0.0953791	ENSMUSG00000026895
Hspg2	5.33942e-06	0.160772	0.463	0.336	0.107258	ENSMUSG00000028763
H2-Q7	5.45525e-06	0.147556	0.318	0.214	0.109585	ENSMUSG00000060550
Pcdhgb1	5.58722e-06	0.0353866	0.627	0.496	0.112236	ENSMUSG00000103037
Lpar4	6.84235e-06	0.0986928	0.149	0.078	0.137449	ENSMUSG00000049929
Aldoa	6.9517e-06	-0.20605	0.546	0.581	0.139646	ENSMUSG00000030695
Tspan9	8.2351e-06	0.133916	0.376	0.258	0.165427	ENSMUSG00000030352
Myo18a	8.38943e-06	0.11866	0.325	0.215	0.168527	ENSMUSG00000000631
Zfp120	9.38098e-06	0.098218	0.081	0.032	0.188445	ENSMUSG00000068134
Serpinh1	9.85937e-06	0.173988	0.688	0.561	0.198055	ENSMUSG00000070436
Dpysl2	9.91783e-06	0.119446	0.305	0.201	0.199229	ENSMUSG00000022048
Rpl5	1.07882e-05	-0.0903815	0.861	0.867	0.216712	ENSMUSG00000058558
Dapk2	1.09419e-05	0.113143	0.147	0.078	0.2198	ENSMUSG00000032380
Fth1	1.11913e-05	-0.104189	0.8	0.795	0.224811	ENSMUSG00000024661
Gm11808	1.1746e-05	-0.117768	0.833	0.879	0.235953	ENSMUSG00000068240
Zdhhc20	1.1891e-05	0.128065	0.312	0.21	0.238867	ENSMUSG00000021969
Rpl41	1.30628e-05	-0.0903662	0.933	0.938	0.262405	ENSMUSG00000093674
Map4k2	1.33802e-05	0.116565	0.148	0.08	0.268782	ENSMUSG00000024948
Rab11fip5	1.35661e-05	0.0649073	0.123	0.061	0.272516	ENSMUSG00000051343
Rpl35	1.40959e-05	-0.110914	0.827	0.831	0.283158	ENSMUSG00000062997
Clca2	1.47264e-05	0.0304516	0.019	0	0.295825	ENSMUSG00000036960
Trdn	1.47264e-05	0.0371632	0.019	0	0.295825	ENSMUSG00000019787
Sost	1.47264e-05	0.046474	0.019	0	0.295825	ENSMUSG00000001494
Gm11716	1.47264e-05	0.0428098	0.019	0	0.295825	ENSMUSG00000086298
Col4a1	1.51487e-05	0.151125	0.864	0.759	0.304308	ENSMUSG00000031502
Sppl3	1.54686e-05	0.0899214	0.229	0.14	0.310734	ENSMUSG00000029550
Psmd3	1.65254e-05	0.121937	0.174	0.099	0.331963	ENSMUSG00000017221
Fkrp	1.67818e-05	0.105006	0.094	0.043	0.337114	ENSMUSG00000048920
Ptk7	1.70526e-05	0.0636228	0.062	0.021	0.342552	ENSMUSG00000023972
Maged1	1.72213e-05	0.0920795	0.209	0.124	0.345941	ENSMUSG00000025151
Adam19	1.7424e-05	0.0761937	0.116	0.057	0.350013	ENSMUSG00000011256
Ly6c1	1.79445e-05	-0.157223	0.749	0.78	0.360468	ENSMUSG00000079018
Sipa1	1.79874e-05	0.126541	0.386	0.264	0.361332	ENSMUSG00000056917
AC113508.1	1.89164e-05	0.130294	0.194	0.116	0.379993	ENSMUSG00000113334
Smarca2	2.10725e-05	-0.190044	0.531	0.568	0.423304	ENSMUSG00000024921
AC175538.2	2.22784e-05	0.0647183	0.135	0.071	0.447528	ENSMUSG00000114470
Sema3g	2.37871e-05	-0.264565	0.399	0.463	0.477836	ENSMUSG00000021904
Rhoq	2.39177e-05	0.0918073	0.12	0.061	0.480459	ENSMUSG00000024143
Lcp1	2.45908e-05	0.133376	0.366	0.256	0.49398	ENSMUSG00000021998
Ybx3	2.88485e-05	-0.150449	0.598	0.633	0.579508	ENSMUSG00000030189
Adipoq	2.91236e-05	0.109263	0.078	0.032	0.585035	ENSMUSG00000022878
AI846148	2.95067e-05	0.092352	0.123	0.063	0.592731	ENSMUSG00000024970
Col18a1	3.04616e-05	0.140581	0.382	0.272	0.611913	ENSMUSG00000001435
Gm17634	3.16175e-05	0.0370864	0.017	0	0.635133	ENSMUSG00000097482
AI115009	3.16175e-05	0.0338826	0.017	0	0.635133	ENSMUSG00000097745
Fmo1	3.74545e-05	-0.174149	0.149	0.226	0.752387	ENSMUSG00000040181
Stmn1	3.77175e-05	0.0865282	0.181	0.106	0.75767	ENSMUSG00000028832
Slc38a2	3.80065e-05	0.140716	0.398	0.281	0.763474	ENSMUSG00000022462
Fam102b	3.87018e-05	0.10589	0.138	0.076	0.777441	ENSMUSG00000040339
Rubcn	3.97466e-05	0.075457	0.057	0.019	0.79843	ENSMUSG00000035629
Atpif1	4.01374e-05	0.14674	0.443	0.324	0.80628	ENSMUSG00000054428
Dynlt1b	4.03278e-05	0.0662248	0.319	0.219	0.810105	ENSMUSG00000096255
Apln	4.26292e-05	0.129726	0.102	0.05	0.856335	ENSMUSG00000037010
Ptgs1	4.31968e-05	0.121955	0.254	0.169	0.867738	ENSMUSG00000047250
Dnaja1	4.40279e-05	-0.173999	0.585	0.614	0.884432	ENSMUSG00000028410
Hmox1	4.40868e-05	0.0842546	0.197	0.119	0.885616	ENSMUSG00000005413
Cd40	4.58126e-05	0.0609142	0.07	0.027	0.920284	ENSMUSG00000017652
Pelo	4.62585e-05	0.0607806	0.135	0.073	0.929241	ENSMUSG00000042275
Rep15	5.08969e-05	0.061786	0.061	0.022	1	ENSMUSG00000040121
Ica1	5.2308e-05	0.0753327	0.161	0.092	1	ENSMUSG00000062995
Ccnd1	5.23825e-05	0.156701	0.417	0.313	1	ENSMUSG00000070348
Ncor2	5.26474e-05	0.102471	0.21	0.132	1	ENSMUSG00000029478
Ptpre	5.50831e-05	0.0911505	0.149	0.084	1	ENSMUSG00000041836
Dynlt1a	5.50901e-05	0.0692865	0.311	0.214	1	ENSMUSG00000092074
Cxxc4	5.55174e-05	-0.0514509	0	0.023	1	ENSMUSG00000044365
Flt1	5.56298e-05	-0.118167	0.814	0.817	1	ENSMUSG00000029648
Arhgap18	5.69527e-05	0.106415	0.171	0.101	1	ENSMUSG00000039031
Mpv17	5.84911e-05	0.107416	0.202	0.126	1	ENSMUSG00000107283
Sestd1	6.19675e-05	0.0790638	0.1	0.049	1	ENSMUSG00000042272
Jade1	6.50491e-05	-0.165202	0.077	0.137	1	ENSMUSG00000025764
Pin1	6.58863e-05	0.0681664	0.125	0.066	1	ENSMUSG00000032171
Ppp3r1	6.65117e-05	0.0856622	0.241	0.154	1	ENSMUSG00000033953
Lamc1	6.68356e-05	0.136256	0.505	0.393	1	ENSMUSG00000026478
Comt	6.76643e-05	0.142946	0.489	0.367	1	ENSMUSG00000000326
Ppm1j	6.8021e-05	0.0284911	0.016	0	1	ENSMUSG00000002228
Rcbtb2	6.94605e-05	0.0988084	0.183	0.109	1	ENSMUSG00000022106
Colgalt2	7.1271e-05	0.0690941	0.1	0.049	1	ENSMUSG00000032649
Mark2	7.32815e-05	0.12328	0.184	0.113	1	ENSMUSG00000024969
Rere	7.58936e-05	0.0993875	0.228	0.147	1	ENSMUSG00000039852
Rab11b	8.23717e-05	0.126311	0.533	0.403	1	ENSMUSG00000077450
Cdh11	9.20815e-05	0.0588797	0.058	0.021	1	ENSMUSG00000031673
Dtx3	9.49912e-05	0.107817	0.138	0.078	1	ENSMUSG00000040415
Dcp2	9.6966e-05	0.0898357	0.118	0.063	1	ENSMUSG00000024472
Rps6-ps4	9.81283e-05	-0.158315	0.511	0.567	1	ENSMUSG00000081406
Hspa1a	9.86571e-05	-0.226208	0.186	0.252	1	ENSMUSG00000091971
Col9a1	9.95705e-05	0.08439	0.099	0.049	1	ENSMUSG00000026147
Mbtps1	0.000102125	0.0878234	0.19	0.115	1	ENSMUSG00000031835
Gm22513	0.000102436	-0.0960394	0.02	0.059	1	ENSMUSG00000096349
Igfbp7	0.000102501	-0.0599515	0.962	0.953	1	ENSMUSG00000036256
Ccdc152	0.000104165	0.0757379	0.071	0.03	1	ENSMUSG00000091119
Gm13341	0.00010628	0.0888467	0.138	0.078	1	ENSMUSG00000083863
Nfya	0.000108973	0.0638467	0.171	0.101	1	ENSMUSG00000023994
Cnppd1	0.000109379	0.0881582	0.171	0.103	1	ENSMUSG00000033159
Pde2a	0.000111065	0.116126	0.591	0.47	1	ENSMUSG00000110195
Mmp13	0.000114758	0.0832408	0.065	0.026	1	ENSMUSG00000050578
Lpcat1	0.000115013	0.0939719	0.219	0.141	1	ENSMUSG00000021608
Gvin1	0.000118594	-0.169533	0.525	0.574	1	ENSMUSG00000045868
Gm26315	0.000128631	-0.0388597	0.015	0.05	1	ENSMUSG00000065824
Epas1	0.000131068	-0.122038	0.797	0.819	1	ENSMUSG00000024140
Fcgr2b	0.000134399	-0.140817	0.081	0.14	1	ENSMUSG00000026656
Nprl3	0.000135542	0.0648986	0.057	0.021	1	ENSMUSG00000020289
Ndst2	0.000141672	0.0743044	0.083	0.038	1	ENSMUSG00000039308
Gtpbp2	0.000143074	0.108051	0.212	0.137	1	ENSMUSG00000023952
Car2	0.000145357	-0.187808	0.19	0.263	1	ENSMUSG00000027562
Slitrk2	0.000146711	0.0227679	0.015	0	1	ENSMUSG00000036790
Igfbp3	0.000147475	-0.280649	0.197	0.26	1	ENSMUSG00000020427
Cdr2l	0.000151129	0.103691	0.212	0.136	1	ENSMUSG00000050910
Insr	0.000151961	-0.169452	0.144	0.211	1	ENSMUSG00000005534
Ubc	0.000153065	0.118789	0.843	0.758	1	ENSMUSG00000008348
Snx17	0.00016084	0.0863682	0.224	0.145	1	ENSMUSG00000029146
Ephb1	0.000161178	0.0748288	0.096	0.048	1	ENSMUSG00000032537
Ltbp2	0.000162573	0.0403011	0.017	0.001	1	ENSMUSG00000002020
Rpl23	0.000164241	-0.0717391	0.917	0.928	1	ENSMUSG00000071415
Csnk1g2	0.000165112	0.0911152	0.277	0.188	1	ENSMUSG00000003345
Nfkbiz	0.000166526	0.0859292	0.109	0.058	1	ENSMUSG00000035356
Cul7	0.00016788	0.0597239	0.099	0.05	1	ENSMUSG00000038545
Slc25a11	0.000168201	0.0997309	0.19	0.119	1	ENSMUSG00000014606
Mcpt8	0.000172923	-0.0475102	0	0.02	1	ENSMUSG00000022157
Sox18	0.000173422	-0.0985003	0.811	0.842	1	ENSMUSG00000046470
Trp53inp2	0.000173798	0.0773992	0.184	0.114	1	ENSMUSG00000038375
Cyth4	0.000176788	0.0516099	0.112	0.059	1	ENSMUSG00000018008
AC164629.8	0.000181699	0.0538117	0.102	0.053	1	ENSMUSG00000112580
Slc38a10	0.000188873	0.115974	0.225	0.151	1	ENSMUSG00000061306
Gm24447	0.000195876	-0.0433943	0.016	0.051	1	ENSMUSG00000065911
Sh3glb1	0.00019982	-0.123974	0.687	0.679	1	ENSMUSG00000037062
Man2b1	0.000200075	0.0917972	0.189	0.118	1	ENSMUSG00000005142
Marcksl1	0.000204118	0.136256	0.453	0.343	1	ENSMUSG00000047945
Elp2	0.000207136	0.0810666	0.158	0.095	1	ENSMUSG00000024271
Dynlt1f	0.000208726	0.0669428	0.261	0.181	1	ENSMUSG00000095677
Mgat1	0.000209267	0.111997	0.398	0.291	1	ENSMUSG00000020346
Smg6	0.000210408	0.0812179	0.12	0.067	1	ENSMUSG00000038290
Hspa1b	0.000212225	-0.217535	0.248	0.311	1	ENSMUSG00000090877
Abcg1	0.000213806	0.103445	0.239	0.161	1	ENSMUSG00000024030
Tspan18	0.00021663	0.118084	0.305	0.217	1	ENSMUSG00000027217
Rbm28	0.000221104	0.116372	0.157	0.096	1	ENSMUSG00000029701
Cyyr1	0.000223242	-0.15515	0.621	0.627	1	ENSMUSG00000041134
Rps3a2	0.000230334	-0.128078	0.086	0.144	1	ENSMUSG00000062611
Prmt9	0.000232003	0.0566786	0.055	0.021	1	ENSMUSG00000037134
Mboat2	0.000232799	0.0526532	0.044	0.014	1	ENSMUSG00000020646
Apoe	0.000233835	-0.173089	0.435	0.49	1	ENSMUSG00000002985
Nckap5l	0.000239418	0.0572695	0.055	0.021	1	ENSMUSG00000023009
Neurl1b	0.00024088	0.0503363	0.074	0.033	1	ENSMUSG00000034413
Eif1	0.000241078	-0.107084	0.774	0.773	1	ENSMUSG00000035530
Rnf122	0.00024213	0.0770493	0.11	0.06	1	ENSMUSG00000039328
Mrpl50	0.000242267	0.0683791	0.144	0.084	1	ENSMUSG00000044018
Itgb1bp1	0.000245248	0.055907	0.089	0.044	1	ENSMUSG00000062352
Gm13056	0.000247142	0.040081	0.03	0.007	1	ENSMUSG00000085395
Smad1	0.000251239	0.114186	0.354	0.261	1	ENSMUSG00000031681
Prg2	0.000252804	-0.052661	0	0.019	1	ENSMUSG00000027073
Tmem214	0.000253388	0.0841179	0.122	0.069	1	ENSMUSG00000038828
Gm10845	0.000255561	0.0199424	0.022	0.003	1	ENSMUSG00000095959
Nr4a1	0.000256505	0.134997	0.302	0.218	1	ENSMUSG00000023034
Zfp74	0.000257744	0.0473157	0.057	0.022	1	ENSMUSG00000059975
Sh3bp2	0.000262142	0.0617341	0.046	0.016	1	ENSMUSG00000054520
Col15a1	0.000263511	0.159157	0.302	0.223	1	ENSMUSG00000028339
Ndufs1	0.000266317	0.0644728	0.17	0.103	1	ENSMUSG00000025968
Ifitm2	0.000276368	-0.132565	0.695	0.703	1	ENSMUSG00000060591
Adam17	0.000276874	0.0963349	0.298	0.209	1	ENSMUSG00000052593
Mctp1	0.000280029	-0.115851	0.039	0.083	1	ENSMUSG00000021596
Ifitm3	0.000282414	-0.0895007	0.881	0.88	1	ENSMUSG00000025492
Vim	0.000287628	-0.135843	0.801	0.82	1	ENSMUSG00000026728
Plpp1	0.000290652	0.133033	0.681	0.573	1	ENSMUSG00000021759
Gnas	0.000295972	-0.0648422	0.98	0.972	1	ENSMUSG00000027523
Tnks2	0.000299229	0.106263	0.312	0.222	1	ENSMUSG00000024811
Lyn	0.000300704	0.101643	0.206	0.137	1	ENSMUSG00000042228
Trappc1	0.000301321	0.083882	0.229	0.153	1	ENSMUSG00000049299
St3gal5	0.000305316	0.0713057	0.089	0.045	1	ENSMUSG00000056091
Wbp4	0.000309073	0.113497	0.283	0.199	1	ENSMUSG00000022023
4931428F04Rik	0.000314648	0.0368448	0.019	0.002	1	ENSMUSG00000014837
Mmrn1	0.000317137	0.13715	0.248	0.173	1	ENSMUSG00000054641
Gm4070	0.000317225	-0.164131	0.525	0.57	1	ENSMUSG00000078606
Clec12b	0.00031745	0.0250553	0.013	0	1	ENSMUSG00000030158
Gm45768	0.00031745	0.02066	0.013	0	1	ENSMUSG00000108434
Clu	0.00031788	-0.24677	0.17	0.235	1	ENSMUSG00000022037
Slc25a10	0.000321181	0.0648336	0.052	0.02	1	ENSMUSG00000025792
Dynll1	0.000322075	-0.159792	0.528	0.566	1	ENSMUSG00000009013
Sqstm1	0.00032987	0.109172	0.473	0.354	1	ENSMUSG00000015837
Tti1	0.000330455	0.0726504	0.078	0.037	1	ENSMUSG00000027650
Mknk2	0.000336051	0.097833	0.247	0.168	1	ENSMUSG00000020190
Cd1d1	0.000340241	0.0524243	0.093	0.048	1	ENSMUSG00000028076
Clec2d	0.000342935	-0.143332	0.591	0.621	1	ENSMUSG00000030157
Gm45733	0.000351598	0.0397241	0.097	0.051	1	ENSMUSG00000110620
Arpc2	0.000353764	-0.103941	0.771	0.763	1	ENSMUSG00000006304
Cops5	0.000354149	0.0945432	0.176	0.111	1	ENSMUSG00000025917
Odc1	0.00035595	0.114636	0.208	0.141	1	ENSMUSG00000011179
Kdm3b	0.00035697	-0.0579193	0.012	0.041	1	ENSMUSG00000038773
Osbpl6	0.000366166	0.0613971	0.052	0.02	1	ENSMUSG00000042359
Dynlt1c	0.000369645	0.0453173	0.322	0.231	1	ENSMUSG00000000579
Nts	0.00036984	-0.0591845	0	0.018	1	ENSMUSG00000019890
Btg2	0.000371465	0.108947	0.409	0.304	1	ENSMUSG00000020423
Sbf1	0.000377359	0.0454363	0.033	0.009	1	ENSMUSG00000036529
Repin1	0.00037804	0.0598633	0.054	0.021	1	ENSMUSG00000052751
Ighmbp2	0.000380335	0.0288191	0.023	0.004	1	ENSMUSG00000024831
Gnb4	0.00038148	0.0687362	0.219	0.144	1	ENSMUSG00000027669
Khnyn	0.000384065	0.0525838	0.081	0.039	1	ENSMUSG00000047153
Marcks	0.000388704	0.129139	0.772	0.67	1	ENSMUSG00000069662
Rps25	0.000401115	-0.1108	0.816	0.83	1	ENSMUSG00000009927
Gmfg	0.000407044	0.0624086	0.089	0.046	1	ENSMUSG00000060791
R3hdm4	0.000408681	0.0523249	0.212	0.138	1	ENSMUSG00000035781
Mtss1	0.000408815	0.076892	0.283	0.197	1	ENSMUSG00000022353
Myl6	0.000415905	-0.100832	0.768	0.762	1	ENSMUSG00000090841
Fam160b2	0.000422178	0.0397171	0.054	0.021	1	ENSMUSG00000022095
Sugp1	0.000424471	0.0460649	0.078	0.037	1	ENSMUSG00000011306
Atp1b3	0.000425877	-0.138332	0.601	0.631	1	ENSMUSG00000032412
Btd	0.000426553	0.059979	0.107	0.06	1	ENSMUSG00000021900
Pde4b	0.000429097	0.0924262	0.129	0.076	1	ENSMUSG00000028525
Dchs1	0.000432339	0.0864008	0.152	0.094	1	ENSMUSG00000036862
Rps16-ps2	0.000436527	-0.159968	0.486	0.55	1	ENSMUSG00000060419
Mboat7	0.000440205	0.0699688	0.084	0.043	1	ENSMUSG00000035596
Cst3	0.000446107	-0.113396	0.806	0.799	1	ENSMUSG00000027447
Slc20a2	0.000455649	0.0657497	0.065	0.029	1	ENSMUSG00000037656
Mtss1l	0.000459957	0.108179	0.303	0.218	1	ENSMUSG00000033763
Lemd2	0.000462381	0.0534945	0.102	0.055	1	ENSMUSG00000044857
Abcd4	0.000475758	0.0573088	0.083	0.041	1	ENSMUSG00000021240
Cdc25a	0.00047782	0.049213	0.062	0.027	1	ENSMUSG00000032477
Zfp825	0.000478481	0.0560123	0.064	0.028	1	ENSMUSG00000069208
Nes	0.000479845	0.100154	0.287	0.204	1	ENSMUSG00000004891
Rab31	0.000493662	0.0530126	0.103	0.056	1	ENSMUSG00000056515
Limd1	0.000496239	0.0607715	0.184	0.117	1	ENSMUSG00000025239
Ubald2	0.000503468	0.106946	0.241	0.166	1	ENSMUSG00000050628
Nrp2	0.000511858	0.127043	0.54	0.434	1	ENSMUSG00000025969
Jkamp	0.000517987	0.0768555	0.192	0.124	1	ENSMUSG00000005078
Atp5j2	0.000518404	0.09333	0.279	0.197	1	ENSMUSG00000038690
Gprc5b	0.000519099	0.108186	0.136	0.083	1	ENSMUSG00000008734
Suco	0.000525307	0.0547616	0.155	0.095	1	ENSMUSG00000040297
Atp11a	0.000526931	0.0536007	0.11	0.062	1	ENSMUSG00000031441
Cmc1	0.000531023	0.0758296	0.109	0.061	1	ENSMUSG00000039163
Col6a1	0.000531739	0.100561	0.097	0.053	1	ENSMUSG00000001119
Degs1	0.000533604	0.1096	0.331	0.243	1	ENSMUSG00000038633
Pxdc1	0.00053965	0.0571791	0.083	0.041	1	ENSMUSG00000021411
52569	0.00054724	0.0518436	0.078	0.038	1	NA
Fam133b	0.000547761	0.0881533	0.18	0.116	1	ENSMUSG00000058503
Hnrnpa2b1	0.000551049	-0.0796472	0.83	0.808	1	ENSMUSG00000004980
Emc4	0.000556855	0.0656337	0.141	0.086	1	ENSMUSG00000027131
Jam2	0.000558565	-0.202032	0.308	0.365	1	ENSMUSG00000053062
Matn3	0.000559605	0.0612615	0.03	0.008	1	ENSMUSG00000020583
Colgalt1	0.000564658	0.0901674	0.247	0.172	1	ENSMUSG00000034807
Gm45837	0.000566354	0.0994641	0.578	0.466	1	ENSMUSG00000030653
Bcar3	0.000574948	0.0519464	0.07	0.032	1	ENSMUSG00000028121
Rpn1	0.000598462	0.0925315	0.289	0.206	1	ENSMUSG00000030062
Glul	0.000603077	-0.122395	0.788	0.81	1	ENSMUSG00000026473
Trp53i11	0.000615265	0.132723	0.402	0.309	1	ENSMUSG00000068735
Pitpnm2	0.000616725	0.119473	0.331	0.243	1	ENSMUSG00000029406
Cd38	0.00061991	0.131716	0.528	0.417	1	ENSMUSG00000029084
Eif4e2	0.000639214	0.0470437	0.142	0.085	1	ENSMUSG00000026254
Ippk	0.000643382	0.0459553	0.039	0.013	1	ENSMUSG00000021385
AC153504.2	0.000646955	0.0484847	0.054	0.022	1	ENSMUSG00000112805
Gm43558	0.000652409	0.0763742	0.193	0.131	1	ENSMUSG00000106628
Phlda1	0.000652978	0.0802774	0.134	0.08	1	ENSMUSG00000020205
Abcc4	0.000654935	0.0703152	0.129	0.077	1	ENSMUSG00000032849
Bola2	0.000660746	0.0657621	0.096	0.052	1	ENSMUSG00000047721
Usp48	0.000662902	0.0993536	0.125	0.074	1	ENSMUSG00000043411
Mmp9	0.000666292	0.048513	0.017	0.002	1	ENSMUSG00000017737
Tmem134	0.000668216	0.0525944	0.224	0.149	1	ENSMUSG00000024845
Gm37474	0.000669472	0.0239724	0.017	0.002	1	ENSMUSG00000102153
Gramd1a	0.00067312	0.0895811	0.102	0.057	1	ENSMUSG00000001248
Gm25360	0.000684991	-0.0337638	0.013	0.041	1	ENSMUSG00000094655
Sun2	0.000686806	0.076718	0.21	0.14	1	ENSMUSG00000042524
Gm38414	0.000689696	0.0168772	0.012	0	1	ENSMUSG00000109704
Sez6	0.000689696	0.0297023	0.012	0	1	ENSMUSG00000000632
Timm10b	0.000692337	0.107074	0.258	0.185	1	ENSMUSG00000089847
Tfdp1	0.000693472	0.0697818	0.118	0.068	1	ENSMUSG00000038482
Tex264	0.000693551	0.0646112	0.151	0.093	1	ENSMUSG00000040813
Pank2	0.000694777	0.0790901	0.186	0.121	1	ENSMUSG00000037514
Hgsnat	0.000696592	0.0702686	0.128	0.076	1	ENSMUSG00000037260
C1qtnf6	0.000698369	0.0520018	0.086	0.045	1	ENSMUSG00000022440
Gm12940	0.000705135	0.0644776	0.065	0.03	1	ENSMUSG00000085334
Morf4l1	0.000711049	-0.0872884	0.839	0.841	1	ENSMUSG00000062270
Tmem120b	0.000712998	0.0714794	0.071	0.034	1	ENSMUSG00000054434
Rbp1	0.000718832	0.0761051	0.302	0.216	1	ENSMUSG00000046402
Atp11c	0.000720792	-0.129392	0.083	0.134	1	ENSMUSG00000062949
Rasgef1b	0.000721414	0.069057	0.083	0.043	1	ENSMUSG00000089809
C230037L18Rik	0.000742092	0.0511521	0.033	0.01	1	ENSMUSG00000084915
Ywhab	0.000746613	-0.102783	0.797	0.79	1	ENSMUSG00000018326
mt-Nd3	0.000746622	-0.0556744	0.991	0.991	1	ENSMUSG00000064360
CT030170.4	0.000746955	0.0326093	0.022	0.004	1	ENSMUSG00000113536
Lrp4	0.000748016	0.0533475	0.044	0.016	1	ENSMUSG00000027253
Zfp36l1	0.000749601	-0.0853319	0.79	0.78	1	ENSMUSG00000021127
Acot7	0.00075375	0.076363	0.113	0.065	1	ENSMUSG00000028937
Hcls1	0.000754036	0.059518	0.104	0.059	1	ENSMUSG00000022831
H2-K1	0.000755337	-0.0604864	0.907	0.901	1	ENSMUSG00000061232
Gm11810	0.000755977	0.0230229	0.015	0.001	1	ENSMUSG00000082151
Hp	0.000757154	0.0714709	0.08	0.04	1	ENSMUSG00000031722
Arl8b	0.000763063	0.0785474	0.237	0.164	1	ENSMUSG00000030105
Atxn10	0.000782568	0.0787398	0.183	0.119	1	ENSMUSG00000016541
Zfp703	0.000785952	0.0565594	0.073	0.035	1	ENSMUSG00000085795
Atp9a	0.00078764	0.0597626	0.147	0.09	1	ENSMUSG00000027546
Casp3	0.000789265	0.0625382	0.194	0.129	1	ENSMUSG00000031628
Prdm1	0.000791339	0.0552705	0.065	0.03	1	ENSMUSG00000038151
Kansl2	0.000796579	0.0938435	0.187	0.124	1	ENSMUSG00000022992
Hdgfl3	0.000799931	-0.134103	0.086	0.137	1	ENSMUSG00000025104
Amfr	0.000812092	0.0471695	0.187	0.12	1	ENSMUSG00000031751
Flna	0.000827484	0.0975114	0.422	0.321	1	ENSMUSG00000031328
Col9a2	0.000837025	0.0656992	0.07	0.033	1	ENSMUSG00000028626
Clcn4	0.000846452	0.065174	0.187	0.122	1	ENSMUSG00000000605
Prn	0.00085545	0.032327	0.035	0.011	1	ENSMUSG00000098754
Prnd	0.00085545	0.032327	0.035	0.011	1	ENSMUSG00000027338
Nceh1	0.000930052	0.0326373	0.065	0.03	1	ENSMUSG00000027698
Gm42860	0.000936763	-0.0474822	0.073	0.122	1	ENSMUSG00000106044
Strn4	0.000944753	0.0890977	0.316	0.228	1	ENSMUSG00000030374
Lrrc14	0.000956862	0.0535366	0.048	0.019	1	ENSMUSG00000033728
Mcam	0.00095867	0.110241	0.524	0.415	1	ENSMUSG00000032135
Uba52	0.000963867	-0.0827977	0.856	0.892	1	ENSMUSG00000090137
Dnaja4	0.000963891	0.0665247	0.086	0.046	1	ENSMUSG00000032285
Aqp1	0.00096861	-0.136389	0.47	0.529	1	ENSMUSG00000004655
Junb	0.000981208	0.128007	0.543	0.442	1	ENSMUSG00000052837
Ptprcap	0.000982936	0.0484803	0.282	0.201	1	ENSMUSG00000045826
Wdr75	0.000989988	0.0683851	0.081	0.043	1	ENSMUSG00000025995
Mpp1	0.000997061	0.0791764	0.234	0.163	1	ENSMUSG00000031402
Plod1	0.00100047	0.0902647	0.491	0.376	1	ENSMUSG00000019055
Lama4	0.00101015	0.0622199	0.229	0.158	1	ENSMUSG00000019846
Tril	0.00101626	0.0663184	0.21	0.142	1	ENSMUSG00000043496
Bambi	0.00102644	0.0879024	0.215	0.149	1	ENSMUSG00000024232
Stk25	0.00103496	0.0691898	0.234	0.161	1	ENSMUSG00000026277
Tspan6	0.00104881	0.0559305	0.103	0.059	1	ENSMUSG00000067377
Ufd1	0.00104975	0.0668844	0.183	0.121	1	ENSMUSG00000005262
Kdm6a	0.00105557	-0.109483	0.049	0.091	1	ENSMUSG00000037369
Arhgap1	0.00106646	0.0691788	0.16	0.102	1	ENSMUSG00000027247
Tssc4	0.00107134	0.0638733	0.115	0.068	1	ENSMUSG00000045752
Napa	0.00107198	0.094256	0.239	0.168	1	ENSMUSG00000006024
Olfr46	0.00108611	0.0635318	0.142	0.09	1	ENSMUSG00000093942
Trmt1	0.00108736	0.0609654	0.077	0.039	1	ENSMUSG00000001909
Dnlz	0.00108873	0.0510424	0.086	0.046	1	ENSMUSG00000075467
Jam3	0.00108932	0.0555582	0.07	0.034	1	ENSMUSG00000031990
Gm13889	0.00109055	0.0772892	0.115	0.068	1	ENSMUSG00000087006
Adamts12	0.00109065	0.0486427	0.038	0.013	1	ENSMUSG00000047497
Maff	0.00109316	0.0583446	0.08	0.041	1	ENSMUSG00000042622
Tsc22d4	0.00109373	0.061423	0.218	0.149	1	ENSMUSG00000029723
Krba1	0.00109824	0.0381267	0.038	0.013	1	ENSMUSG00000042810
Stab2	0.00110248	0.137074	0.377	0.29	1	ENSMUSG00000035459
Tiparp	0.00111251	0.0736201	0.107	0.063	1	ENSMUSG00000034640
Pecam1	0.00112756	-0.0797283	0.898	0.896	1	ENSMUSG00000020717
Hspa8	0.00114011	-0.108941	0.782	0.789	1	ENSMUSG00000015656
Srsf9	0.00114241	0.0826125	0.276	0.2	1	ENSMUSG00000029538
Cul3	0.00115154	-0.212748	0.313	0.353	1	ENSMUSG00000004364
Gm25813	0.00115426	-0.0282122	0.012	0.037	1	ENSMUSG00000064682
Fam114a2	0.00115766	0.0823851	0.264	0.189	1	ENSMUSG00000020523
Cfl1	0.00115772	-0.0394591	0.983	0.969	1	ENSMUSG00000056201
Ms4a6d	0.0011642	-0.0318719	0	0.015	1	ENSMUSG00000024679
Soga1	0.00118899	0.0370739	0.039	0.014	1	ENSMUSG00000055485
Vsir	0.0011911	0.0761272	0.157	0.101	1	ENSMUSG00000020101
Aco1	0.00119542	0.0634196	0.074	0.037	1	ENSMUSG00000028405
Ctdspl	0.00119862	0.0370548	0.039	0.014	1	ENSMUSG00000047409
Vsig2	0.00119897	0.0536556	0.064	0.03	1	ENSMUSG00000001943
Ago4	0.00121447	0.0324565	0.03	0.009	1	ENSMUSG00000042500
Mllt6	0.00123284	0.063215	0.241	0.167	1	ENSMUSG00000038437
F8	0.00124152	-0.201144	0.299	0.346	1	ENSMUSG00000031196
Dusp6	0.00124159	0.103458	0.505	0.407	1	ENSMUSG00000019960
Pan3	0.00124843	0.0984495	0.176	0.117	1	ENSMUSG00000029647
Plekhg1	0.0012526	0.114942	0.335	0.251	1	ENSMUSG00000040624
Clip2	0.0012533	0.0400154	0.041	0.015	1	ENSMUSG00000063146
9530068E07Rik	0.00125408	0.0730134	0.235	0.166	1	ENSMUSG00000036275
Tmod3	0.00125961	-0.133743	0.566	0.589	1	ENSMUSG00000058587
Slc35a4	0.0012672	0.0604888	0.151	0.096	1	ENSMUSG00000033272
Ipo8	0.00127284	-0.118477	0.054	0.095	1	ENSMUSG00000040029
Rmnd5a	0.00127466	0.0610484	0.225	0.156	1	ENSMUSG00000002222
Slc35b1	0.00127669	0.0695014	0.225	0.156	1	ENSMUSG00000020873
Hsdl2	0.001284	0.0446416	0.123	0.074	1	ENSMUSG00000028383
Recql5	0.0012849	0.0321961	0.025	0.006	1	ENSMUSG00000020752
Wapl	0.00129439	-0.155807	0.132	0.184	1	ENSMUSG00000041408
Elovl6	0.00129496	0.0567663	0.044	0.017	1	ENSMUSG00000041220
Coro1b	0.00130363	0.0486085	0.287	0.207	1	ENSMUSG00000024835
Bglap2	0.00130442	0.0522566	0.138	0.085	1	ENSMUSG00000074486
Zfp36	0.00130664	0.1448	0.54	0.45	1	ENSMUSG00000044786
Rn7sk	0.00131001	-0.0369987	0.025	0.058	1	ENSMUSG00000065037
Ndst1	0.0013166	0.0805637	0.451	0.344	1	ENSMUSG00000054008
Chsy1	0.00133106	0.0536852	0.118	0.07	1	ENSMUSG00000032640
Nptn	0.00133468	0.0967477	0.344	0.256	1	ENSMUSG00000032336
Ncaph	0.00133598	0.0326287	0.025	0.006	1	ENSMUSG00000034906
Osbpl2	0.00134338	0.0549981	0.123	0.075	1	ENSMUSG00000039050
Gosr1	0.00135345	0.0468367	0.09	0.05	1	ENSMUSG00000010392
Eftud2	0.00136781	0.0544446	0.08	0.043	1	ENSMUSG00000020929
Mcrs1	0.00136932	0.0673026	0.058	0.027	1	ENSMUSG00000037570
Id4	0.00138038	0.0843215	0.152	0.098	1	ENSMUSG00000021379
Chic2	0.00138183	0.0660477	0.263	0.188	1	ENSMUSG00000029229
Mgat4b	0.0013944	0.104202	0.321	0.239	1	ENSMUSG00000036620
Rps6kb2	0.00141075	0.05474	0.109	0.064	1	ENSMUSG00000024830
Psmb2	0.00141562	0.0881884	0.392	0.303	1	ENSMUSG00000028837
Nudt3	0.0014166	0.050536	0.184	0.121	1	ENSMUSG00000024213
Ppp1r15a	0.00143142	0.101929	0.369	0.279	1	ENSMUSG00000040435
Tsta3	0.00143629	0.032211	0.045	0.018	1	ENSMUSG00000022570
Helz2	0.00145516	0.101556	0.139	0.089	1	ENSMUSG00000027580
AC160060.3	0.00146038	-0.0305894	0.003	0.021	1	ENSMUSG00000112683
Trib2	0.00146182	0.0747554	0.167	0.111	1	ENSMUSG00000020601
Helb	0.0014699	0.0245948	0.042	0.016	1	ENSMUSG00000020228
Rpl27a-ps2	0.00147576	0.018312	0.02	0.004	1	ENSMUSG00000058430
Rasd1	0.00148178	0.0893665	0.148	0.096	1	ENSMUSG00000049892
Fbxo31	0.00148285	0.037534	0.044	0.017	1	ENSMUSG00000052934
Nrep	0.00148413	0.0713277	0.328	0.239	1	ENSMUSG00000042834
Tmem98	0.00148603	0.0527537	0.218	0.148	1	ENSMUSG00000035413
Ddi2	0.00149135	0.0619104	0.232	0.161	1	ENSMUSG00000078515
Ganab	0.00150316	0.0592565	0.292	0.212	1	ENSMUSG00000071650
Gm12976	0.00150635	0.0105124	0.01	0	1	ENSMUSG00000087575
AC117232.1	0.00150635	0.0104391	0.01	0	1	ENSMUSG00000105001
Scn3b	0.00150635	0.0207701	0.01	0	1	ENSMUSG00000049281
Dll1	0.00150869	0.0733197	0.167	0.11	1	ENSMUSG00000014773
Ptpmt1	0.00151388	0.0459423	0.094	0.053	1	ENSMUSG00000063235
Prkar1a	0.00151928	-0.107261	0.66	0.649	1	ENSMUSG00000020612
Scamp2	0.00153243	0.0659673	0.16	0.104	1	ENSMUSG00000040188
S1pr4	0.00153716	0.0584249	0.125	0.076	1	ENSMUSG00000044199
Gm5641	0.00154088	-0.112242	0.203	0.265	1	ENSMUSG00000069014
Plcg1	0.00154513	0.0640752	0.209	0.143	1	ENSMUSG00000016933
Gm12918	0.00154729	-0.150163	0.298	0.357	1	ENSMUSG00000066315
Oas1a	0.00154774	0.0466959	0.054	0.024	1	ENSMUSG00000052776
Snx10	0.00155172	0.077656	0.213	0.149	1	ENSMUSG00000038301
Cdk18	0.00155619	0.0601028	0.062	0.03	1	ENSMUSG00000026437
Prelid1	0.00156404	0.0770081	0.324	0.238	1	ENSMUSG00000021486
Sidt2	0.00156683	0.0662036	0.177	0.118	1	ENSMUSG00000034908
Gm44250	0.00156777	0.0706272	0.08	0.043	1	ENSMUSG00000107881
Rpl7a	0.00156833	0.0808775	0.627	0.553	1	ENSMUSG00000062647
Sfpq	0.00156886	-0.182427	0.403	0.436	1	ENSMUSG00000028820
Dbn1	0.00157186	0.0556817	0.138	0.086	1	ENSMUSG00000034675
Ppp3ca	0.00160327	0.091418	0.45	0.353	1	ENSMUSG00000028161
2310039H08Rik	0.00160582	0.046899	0.035	0.012	1	ENSMUSG00000062619
Ccdc85b	0.0016304	0.0715538	0.2	0.136	1	ENSMUSG00000095098
Pim1	0.00163245	0.100181	0.202	0.142	1	ENSMUSG00000024014
Trp53cor1	0.00163607	0.0177759	0.013	0.001	1	ENSMUSG00000085912
Ace	0.00163761	-0.173223	0.129	0.181	1	ENSMUSG00000020681
Tubb5	0.00164944	0.0788323	0.401	0.305	1	ENSMUSG00000001525
Gm2000	0.00165702	-0.153544	0.366	0.424	1	ENSMUSG00000078193
Ankzf1	0.00165889	0.0654308	0.061	0.029	1	ENSMUSG00000026199
Rpl28	0.00165921	-0.115134	0.718	0.729	1	ENSMUSG00000030432
2900060B14Rik	0.00165929	-0.0375498	0.007	0.029	1	ENSMUSG00000107722
Slfn4	0.00166004	0.0322772	0.026	0.007	1	ENSMUSG00000000204
Atp13a2	0.00166228	0.0328374	0.048	0.02	1	ENSMUSG00000036622
Lrp10	0.00169935	0.0437251	0.144	0.091	1	ENSMUSG00000022175
Scly	0.00170008	-0.0622377	0.012	0.036	1	ENSMUSG00000026307
Arf6	0.00170015	0.0602846	0.392	0.293	1	ENSMUSG00000044147
Gm11955	0.00171017	-0.00916859	0	0.014	1	ENSMUSG00000082364
Mzt2	0.00172256	0.0578683	0.07	0.035	1	ENSMUSG00000022671
Rgs2	0.00172666	0.0609231	0.312	0.225	1	ENSMUSG00000026360
Lrrc8a	0.00175273	0.0841517	0.311	0.231	1	ENSMUSG00000007476
Tmem63a	0.00175703	0.0359631	0.17	0.112	1	ENSMUSG00000026519
Cdk1	0.00177716	0.05077	0.062	0.03	1	ENSMUSG00000019942
Smyd2	0.00179198	0.0650324	0.09	0.051	1	ENSMUSG00000026603
P2rx7	0.00179278	0.0504731	0.075	0.039	1	ENSMUSG00000029468
Fam167b	0.00179547	0.114978	0.533	0.435	1	ENSMUSG00000050493
Akap12	0.00179566	0.0928891	0.389	0.303	1	ENSMUSG00000038587
Dph1	0.00180935	0.0424976	0.036	0.013	1	ENSMUSG00000078789
Pabpn1	0.00182244	0.107044	0.493	0.403	1	ENSMUSG00000022194
Dffa	0.00183614	0.0251336	0.052	0.023	1	ENSMUSG00000028974
Tnpo1	0.00183936	0.0712381	0.184	0.126	1	ENSMUSG00000009470
Fbxl2	0.00184632	0.037905	0.036	0.013	1	ENSMUSG00000032507
Ppil1	0.00186055	0.0437466	0.067	0.033	1	ENSMUSG00000024007
Esyt1	0.00187534	0.0506106	0.237	0.166	1	ENSMUSG00000025366
Smox	0.00188637	0.0713604	0.167	0.109	1	ENSMUSG00000027333
Galnt18	0.00189298	0.076211	0.343	0.254	1	ENSMUSG00000038296
Abhd17b	0.00190433	0.0704294	0.331	0.251	1	ENSMUSG00000047368
Lonp1	0.00190729	0.0338234	0.051	0.022	1	ENSMUSG00000041168
Adgra3	0.0019099	0.0451967	0.055	0.025	1	ENSMUSG00000029090
Cpne1	0.00191014	0.0582822	0.279	0.201	1	ENSMUSG00000074643
Tecr	0.00191579	0.0806336	0.232	0.166	1	ENSMUSG00000031708
Atp6ap2	0.00191859	0.065176	0.241	0.169	1	ENSMUSG00000031007
Arf5	0.00192223	0.0716961	0.341	0.254	1	ENSMUSG00000020440
Npepl1	0.00193681	0.0753613	0.161	0.106	1	ENSMUSG00000039263
Axl	0.00195702	0.0874582	0.186	0.128	1	ENSMUSG00000002602
Itgav	0.00198676	0.033643	0.123	0.075	1	ENSMUSG00000027087
Tmtc4	0.00199104	0.0494592	0.039	0.015	1	ENSMUSG00000041594
Gm3055	0.00199414	0.0188134	0.022	0.005	1	ENSMUSG00000094622
Ctps	0.00199949	0.072607	0.109	0.066	1	ENSMUSG00000028633
Rps27a	0.00200356	-0.0877362	0.821	0.826	1	ENSMUSG00000020460
Akr1b3	0.00201189	0.0697748	0.229	0.161	1	ENSMUSG00000001642
Ap2a2	0.00201349	0.0601077	0.167	0.11	1	ENSMUSG00000002957
Cd93	0.00201888	0.10281	0.839	0.762	1	ENSMUSG00000027435
Uhrf2	0.00201937	0.0587513	0.167	0.11	1	ENSMUSG00000024817
Rai1	0.00203178	0.0521127	0.144	0.092	1	ENSMUSG00000062115
Hyal2	0.00203653	0.102184	0.157	0.105	1	ENSMUSG00000010047
Wdr6	0.00203847	0.0512802	0.149	0.096	1	ENSMUSG00000066357
Rps3	0.00205893	-0.0513327	0.853	0.821	1	ENSMUSG00000030744
1110008F13Rik	0.00206085	0.0532483	0.2	0.138	1	ENSMUSG00000027637
Car1	0.00206958	-0.0465567	0.001	0.017	1	ENSMUSG00000027556
Apold1	0.00208156	0.0747633	0.247	0.177	1	ENSMUSG00000090698
Edem1	0.00209048	0.0662206	0.104	0.062	1	ENSMUSG00000030104
Gm17132	0.00209168	0.0550569	0.097	0.057	1	ENSMUSG00000061331
Olfm2	0.00210736	0.0353718	0.017	0.003	1	ENSMUSG00000032172
Rnf19a	0.00211014	0.0655163	0.225	0.16	1	ENSMUSG00000022280
Tbcd	0.00212214	0.0380651	0.029	0.009	1	ENSMUSG00000039230
Fcer1g	0.00212404	0.0963747	0.388	0.298	1	ENSMUSG00000058715
Tk2	0.0021286	0.0309032	0.029	0.009	1	ENSMUSG00000035824
Tbl1xr1	0.00214809	0.0696376	0.132	0.084	1	ENSMUSG00000027630
Csnk1d	0.00217594	0.0727747	0.331	0.246	1	ENSMUSG00000025162
Snx8	0.00220197	0.0568856	0.115	0.07	1	ENSMUSG00000029560
Oas1g	0.00220945	0.0300873	0.042	0.017	1	ENSMUSG00000066861
Washc3	0.00222943	0.0415062	0.179	0.119	1	ENSMUSG00000020056
Ndufc2	0.00223004	0.107035	0.491	0.387	1	ENSMUSG00000030647
Cmtm6	0.0022528	0.0704574	0.338	0.251	1	ENSMUSG00000032434
Hrct1	0.00226373	0.0894011	0.096	0.057	1	ENSMUSG00000071001
Naga	0.00226921	0.0997207	0.167	0.113	1	ENSMUSG00000022453
Gm13408	0.00226961	-0.0750252	0.026	0.057	1	ENSMUSG00000081992
Stx12	0.00227473	0.0854967	0.344	0.261	1	ENSMUSG00000028879
Fam171a2	0.00229525	0.0619331	0.17	0.114	1	ENSMUSG00000034685
Adm	0.00230324	0.0420493	0.03	0.01	1	ENSMUSG00000030790
AC154517.3	0.00231447	0.0490568	0.213	0.151	1	ENSMUSG00000113476
Amotl1	0.00233135	0.0893009	0.52	0.408	1	ENSMUSG00000013076
Vdac3-ps1	0.0023508	-0.0409176	0.012	0.035	1	ENSMUSG00000075053
Fbxo18	0.00237291	0.0524113	0.107	0.065	1	ENSMUSG00000058594
Ddah2	0.00237483	0.0755636	0.245	0.179	1	ENSMUSG00000007039
Rpa3	0.0023789	0.0341743	0.107	0.064	1	ENSMUSG00000012483
Ddx50	0.00237971	0.0743276	0.26	0.189	1	ENSMUSG00000020076
4833420G17Rik	0.00238471	0.0601412	0.103	0.062	1	ENSMUSG00000062822
Atl1	0.00239664	0.0642764	0.061	0.03	1	ENSMUSG00000021066
Nqo2	0.00239762	0.0574605	0.149	0.097	1	ENSMUSG00000046949
Wisp1	0.0024098	0.0401126	0.044	0.018	1	ENSMUSG00000005124
Rps27rt	0.00242071	-0.0569629	0.862	0.865	1	ENSMUSG00000050621
Bend3	0.00242756	0.0311698	0.023	0.006	1	ENSMUSG00000038214
Rgs16	0.00243449	0.0330609	0.03	0.01	1	ENSMUSG00000026475
Cbx3-ps6	0.00243843	-0.0392684	0.032	0.065	1	ENSMUSG00000057886
Dusp5	0.00245936	0.0576623	0.068	0.035	1	ENSMUSG00000034765
Tcerg1	0.00246086	0.0947432	0.209	0.147	1	ENSMUSG00000024498
Tbc1d9	0.00246319	0.0593514	0.057	0.027	1	ENSMUSG00000031709
Exoc6b	0.00249318	0.044151	0.113	0.069	1	ENSMUSG00000033769
Thy1	0.00250393	0.0266677	0.023	0.006	1	ENSMUSG00000032011
Son	0.00250438	0.0972419	0.557	0.442	1	ENSMUSG00000022961
Usb1	0.00250993	0.0250697	0.03	0.01	1	ENSMUSG00000031792
Nlrp3	0.00251597	-0.0318035	0	0.013	1	ENSMUSG00000032691
Rapgef3	0.00253383	0.0621722	0.193	0.134	1	ENSMUSG00000022469
Gm20427	0.00254525	0.0688502	0.325	0.246	1	ENSMUSG00000092595
Gm42566	0.00255075	-0.0666699	0.044	0.08	1	ENSMUSG00000104806
Snrpa1	0.00256764	0.0176837	0.094	0.054	1	ENSMUSG00000030512
Eml2	0.00257404	0.0585738	0.061	0.03	1	ENSMUSG00000040811
Insig1	0.00257693	0.0620373	0.164	0.109	1	ENSMUSG00000045294
Fbxo6	0.00258011	0.0409383	0.052	0.024	1	ENSMUSG00000055401
Kif13a	0.0025996	0.0351353	0.081	0.045	1	ENSMUSG00000021375
Nhp2	0.00260589	0.0524231	0.071	0.037	1	ENSMUSG00000001056
D830044I16Rik	0.00260978	0.0301318	0.044	0.018	1	ENSMUSG00000097075
Cln6	0.00272039	0.0689541	0.093	0.055	1	ENSMUSG00000032245
Gm17018	0.002724	0.0307766	0.061	0.03	1	ENSMUSG00000041035
Tor2a	0.0027311	0.0790082	0.084	0.048	1	ENSMUSG00000009563
Snhg8	0.0027335	0.0902913	0.234	0.168	1	ENSMUSG00000104960
Ddah1	0.00273707	0.0306068	0.061	0.03	1	ENSMUSG00000028194
Tsen34	0.0027525	0.0646715	0.232	0.166	1	ENSMUSG00000035585
Ctnnb1	0.00275809	-0.0734067	0.859	0.853	1	ENSMUSG00000006932
Abracl	0.00276775	0.0664975	0.142	0.093	1	ENSMUSG00000078453
Cxcl14	0.00277821	0.0448957	0.068	0.035	1	ENSMUSG00000021508
Gm28438	0.00277859	-0.0617583	0.971	0.971	1	ENSMUSG00000101939
2810001G20Rik	0.00278437	0.0316396	0.046	0.02	1	ENSMUSG00000087497
Luzp1	0.00279023	-0.184841	0.183	0.229	1	ENSMUSG00000001089
52837	0.00279073	0.0390993	0.052	0.024	1	NA
Stk19	0.00280905	0.0569739	0.081	0.046	1	ENSMUSG00000061207
Calm3	0.00282083	0.0710193	0.312	0.231	1	ENSMUSG00000019370
Triap1	0.00282317	0.0636431	0.154	0.102	1	ENSMUSG00000029535
Pnpla7	0.00283736	0.0254793	0.015	0.002	1	ENSMUSG00000036833
Snx24	0.00284299	0.0339281	0.033	0.012	1	ENSMUSG00000024535
AC153864.1	0.00288328	0.0120845	0.015	0.002	1	ENSMUSG00000112007
Impad1	0.00288996	0.0767437	0.369	0.284	1	ENSMUSG00000066324
Cited2	0.00289861	0.0771748	0.241	0.174	1	ENSMUSG00000039910
Pfkfb1	0.00290514	0.0228884	0.019	0.004	1	ENSMUSG00000025271
S100a11	0.00291275	-0.158739	0.566	0.586	1	ENSMUSG00000027907
Xlr	0.00291694	0.033463	0.033	0.012	1	ENSMUSG00000054626
Polr2l	0.0029377	0.0843501	0.157	0.107	1	ENSMUSG00000038489
Amot	0.00295328	0.0224875	0.055	0.026	1	ENSMUSG00000041688
Gm5879	0.00295679	-0.0534837	0.07	0.111	1	ENSMUSG00000068262
Fam3a	0.00297954	0.0737917	0.106	0.066	1	ENSMUSG00000031399
Hadhb	0.00298765	0.0687874	0.29	0.212	1	ENSMUSG00000059447
Qsox1	0.00299229	0.083147	0.238	0.174	1	ENSMUSG00000033684
Tsnax	0.00299929	0.044443	0.168	0.112	1	ENSMUSG00000056820
Cpsf3	0.00300783	0.0605956	0.12	0.076	1	ENSMUSG00000054309
Minos1	0.00301095	0.0945901	0.17	0.116	1	ENSMUSG00000050608
Ints7	0.00302248	0.041954	0.091	0.053	1	ENSMUSG00000037461
Gm13921	0.0030249	-0.00857691	0.001	0.016	1	ENSMUSG00000082328
Otub1	0.00304479	0.0557779	0.132	0.085	1	ENSMUSG00000024767
Eps15l1	0.00305918	0.0388209	0.136	0.087	1	ENSMUSG00000006276
Ext1	0.00306794	0.0223455	0.152	0.098	1	ENSMUSG00000061731
Spata13	0.00307126	0.0436468	0.128	0.081	1	ENSMUSG00000021990
Gm14586	0.00308724	-0.120854	0.206	0.261	1	ENSMUSG00000083621
Gm15459	0.00309063	-0.13275	0.431	0.478	1	ENSMUSG00000100801
Rbpms	0.00313073	0.101542	0.498	0.396	1	ENSMUSG00000031586
Cmah	0.00315276	-0.070768	0.023	0.052	1	ENSMUSG00000016756
Acadvl	0.00315843	0.051727	0.131	0.083	1	ENSMUSG00000018574
Chst7	0.00318449	0.0552741	0.144	0.094	1	ENSMUSG00000037347
Mpv17l2	0.00318458	0.065287	0.075	0.041	1	ENSMUSG00000035559
Rpl32	0.00320337	-0.0926652	0.7	0.712	1	ENSMUSG00000057841
Ccnl2	0.00321024	0.072784	0.283	0.209	1	ENSMUSG00000029068
Tbc1d22a	0.00321067	0.0833478	0.255	0.188	1	ENSMUSG00000051864
Trim26	0.00321473	0.0239236	0.141	0.09	1	ENSMUSG00000024457
Hnrnpu	0.00322335	-0.124359	0.633	0.628	1	ENSMUSG00000039630
Serpine1	0.00323195	0.0510956	0.038	0.015	1	ENSMUSG00000037411
8430408G22Rik	0.00323384	-0.181838	0.261	0.312	1	ENSMUSG00000048489
Tprgl	0.00323785	0.0808931	0.446	0.345	1	ENSMUSG00000029030
Thsd1	0.00323805	0.0604865	0.109	0.067	1	ENSMUSG00000031480
Syvn1	0.00324919	0.0788735	0.129	0.084	1	ENSMUSG00000024807
Dip2b	0.003255	0.0518317	0.078	0.044	1	ENSMUSG00000023026
Eral1	0.00326458	0.0448569	0.081	0.046	1	ENSMUSG00000020832
Coro2b	0.00326862	0.0600538	0.208	0.148	1	ENSMUSG00000041729
Mmp14	0.00326865	0.0759056	0.38	0.297	1	ENSMUSG00000000957
Kdm7a	0.00328828	0.0640919	0.132	0.085	1	ENSMUSG00000042599
Tbx18	0.00331295	0.0167455	0.009	0	1	ENSMUSG00000032419
Pxylp1	0.00331295	0.0137947	0.009	0	1	ENSMUSG00000043587
Gm9530	0.00331295	0.0128972	0.009	0	1	ENSMUSG00000096950
Gm26917	0.00331314	-0.133778	0.091	0.136	1	ENSMUSG00000097971
Slc45a4	0.00332666	-0.0876271	0.016	0.04	1	ENSMUSG00000079020
Cat	0.00334478	0.0621555	0.192	0.134	1	ENSMUSG00000027187
AC122850.1	0.0033458	0.149206	0.356	0.294	1	ENSMUSG00000112622
Gm4332	0.00336339	-0.162898	0.315	0.37	1	ENSMUSG00000106037
Rftn2	0.00336554	0.0455879	0.081	0.046	1	ENSMUSG00000025978
Ccdc85c	0.00339929	0.0798865	0.11	0.069	1	ENSMUSG00000084883
Rusc2	0.0033998	0.0623313	0.087	0.051	1	ENSMUSG00000035969
Fam43a	0.0034006	0.0978995	0.425	0.337	1	ENSMUSG00000046546
Mrpl9	0.00341453	0.0346571	0.176	0.117	1	ENSMUSG00000028140
Mrps18a	0.00343071	0.05078	0.093	0.055	1	ENSMUSG00000023967
Chst14	0.00343417	0.0722819	0.176	0.121	1	ENSMUSG00000074916
Rad51ap1	0.00344698	0.0281479	0.026	0.008	1	ENSMUSG00000030346
Cadm3	0.0034743	-0.0958583	0.096	0.143	1	ENSMUSG00000005338
Fblim1	0.00347544	0.0771315	0.226	0.164	1	ENSMUSG00000006219
Zfp788	0.00347607	0.0395659	0.038	0.015	1	ENSMUSG00000074165
Irak1	0.0034799	0.0537031	0.35	0.267	1	ENSMUSG00000031392
Ccdc114	0.00350183	0.0262528	0.012	0.001	1	ENSMUSG00000040189
Tmem50a	0.00353305	0.0978182	0.546	0.449	1	ENSMUSG00000028822
Ythdf3	0.00353784	0.0557982	0.17	0.115	1	ENSMUSG00000047213
Ipo9	0.0035588	0.0541727	0.161	0.107	1	ENSMUSG00000041879
Dnase2a	0.00357872	0.0439027	0.041	0.017	1	ENSMUSG00000003812
Nsg1	0.00358348	0.0545104	0.104	0.064	1	ENSMUSG00000029126
Gm2810	0.00358563	0.0427574	0.062	0.032	1	ENSMUSG00000082938
Casp2	0.00358682	0.0518699	0.089	0.052	1	ENSMUSG00000029863
Zkscan1	0.00359049	0.0546738	0.067	0.035	1	ENSMUSG00000029729
Gm42047	0.00359684	0.0369947	0.067	0.035	1	ENSMUSG00000110631
H2-D1	0.00360914	-0.0365593	0.983	0.97	1	ENSMUSG00000073411
Nav1	0.00360919	0.0630227	0.345	0.265	1	ENSMUSG00000009418
Rbak	0.00362426	0.0257634	0.038	0.015	1	ENSMUSG00000061898
Ech1	0.00363504	0.0625196	0.219	0.156	1	ENSMUSG00000053898
Arfgap2	0.0036449	0.0592187	0.16	0.108	1	ENSMUSG00000027255
Gm20545	0.00367732	-0.0395832	0.006	0.024	1	ENSMUSG00000092428
P4hb	0.00367773	0.107152	0.565	0.449	1	ENSMUSG00000025130
Iqce	0.00368027	0.0408929	0.039	0.016	1	ENSMUSG00000036555
Hspa5	0.00369433	-0.0971763	0.726	0.72	1	ENSMUSG00000026864
C230014O12Rik	0.00370804	-0.0229005	0	0.012	1	ENSMUSG00000087461
Rex2	0.00370804	-0.01286	0	0.012	1	ENSMUSG00000067919
Rergl	0.00370804	-0.0259159	0	0.012	1	ENSMUSG00000092164
Vwa3a	0.00370804	-0.0317582	0	0.012	1	ENSMUSG00000030889
Stox1	0.00370804	-0.0326728	0	0.012	1	ENSMUSG00000036923
Lrrc18	0.00370804	-0.0233182	0	0.012	1	ENSMUSG00000041673
Slitrk4	0.00370804	-0.0326616	0	0.012	1	ENSMUSG00000046699
Anxa1	0.00371804	0.07435	0.26	0.188	1	ENSMUSG00000024659
Sgms1	0.00372522	0.0663726	0.279	0.209	1	ENSMUSG00000040451
Mex3c	0.00373645	0.0689299	0.115	0.073	1	ENSMUSG00000037253
Polr2e	0.00375076	0.0696954	0.104	0.065	1	ENSMUSG00000004667
Hnrnpa1	0.00375663	0.0852903	0.369	0.295	1	ENSMUSG00000046434
Foxj2	0.00376856	0.0649327	0.147	0.098	1	ENSMUSG00000003154
Steap4	0.00376968	0.0632004	0.052	0.025	1	ENSMUSG00000012428
Gm43254	0.00378372	0.0177963	0.02	0.005	1	ENSMUSG00000105957
Ccdc28b	0.00379585	0.0568606	0.122	0.077	1	ENSMUSG00000028795
Ip6k1	0.00379891	0.0679415	0.154	0.104	1	ENSMUSG00000032594
Ccdc86	0.0038009	0.0436734	0.061	0.031	1	ENSMUSG00000024732
Gm9917	0.00381179	0.0531662	0.081	0.047	1	ENSMUSG00000097099
Gm8994	0.00382436	0.011445	0.02	0.005	1	ENSMUSG00000094973
Naglu	0.00383188	0.0653276	0.093	0.056	1	ENSMUSG00000001751
Spp1	0.00383307	0.0711646	0.048	0.022	1	ENSMUSG00000029304
Amdhd2	0.00383837	0.0440212	0.083	0.048	1	ENSMUSG00000036820
Usp30	0.00384404	0.0393233	0.045	0.02	1	ENSMUSG00000029592
Qk	0.00385096	0.0976971	0.57	0.461	1	ENSMUSG00000062078
Dvl3	0.00387716	0.0465496	0.087	0.051	1	ENSMUSG00000003233
Abcd3	0.00388025	0.0630358	0.119	0.076	1	ENSMUSG00000028127
Myo1b	0.00391981	0.0513824	0.235	0.169	1	ENSMUSG00000018417
Mtx2	0.00394232	0.0628422	0.09	0.054	1	ENSMUSG00000027099
Arnt	0.00394633	0.0695889	0.122	0.078	1	ENSMUSG00000015522
Dok4	0.00394693	0.0681773	0.181	0.127	1	ENSMUSG00000040631
Pik3r6	0.0039864	0.0511965	0.055	0.027	1	ENSMUSG00000046207
Pofut2	0.00399594	0.0661299	0.173	0.119	1	ENSMUSG00000020260
Comp	0.0039985	0.0500938	0.045	0.02	1	ENSMUSG00000031849
Gpihbp1	0.00402894	0.106218	0.624	0.52	1	ENSMUSG00000022579
Zfp618	0.00402979	0.0221757	0.044	0.019	1	ENSMUSG00000028358
Cbx3-ps7	0.0040359	-0.035882	0.032	0.063	1	ENSMUSG00000059647
Tgfbrap1	0.00403913	0.0429212	0.087	0.051	1	ENSMUSG00000070939
Cers2	0.00406355	0.0580067	0.383	0.295	1	ENSMUSG00000015714
Tpm3	0.00407976	-0.0712134	0.816	0.817	1	ENSMUSG00000027940
Lancl1	0.00410593	0.0587817	0.081	0.048	1	ENSMUSG00000026000
Bglap3	0.00413837	0.0402274	0.049	0.023	1	ENSMUSG00000074489
Cdk5rap3	0.00414648	0.0411015	0.052	0.025	1	ENSMUSG00000018669
Mrgbp	0.00414792	0.0369553	0.061	0.031	1	ENSMUSG00000027569
Fuom	0.00415459	0.0356018	0.051	0.024	1	ENSMUSG00000025466
Hnrnpl	0.00421572	0.0666834	0.386	0.293	1	ENSMUSG00000015165
Rps12l1	0.00421833	-0.110207	0.656	0.688	1	ENSMUSG00000078087
Acer2	0.00422273	-0.162791	0.103	0.145	1	ENSMUSG00000038007
Exosc5	0.00425075	0.0262484	0.049	0.023	1	ENSMUSG00000061286
Tepsin	0.00425351	0.0284011	0.016	0.003	1	ENSMUSG00000025377
Rab5c	0.00427435	0.0943884	0.521	0.421	1	ENSMUSG00000019173
Mark4	0.00428275	0.0313477	0.167	0.113	1	ENSMUSG00000030397
Ubn1	0.00429192	0.0691246	0.27	0.2	1	ENSMUSG00000039473
Pigs	0.00429302	0.0296136	0.075	0.041	1	ENSMUSG00000041958
Fam78a	0.00430828	0.0234909	0.029	0.01	1	ENSMUSG00000050592
Rufy2	0.00431067	0.0600294	0.081	0.047	1	ENSMUSG00000020070
Commd2	0.00431086	0.0232438	0.107	0.066	1	ENSMUSG00000036513
Zfc3h1	0.00431775	0.0465496	0.112	0.07	1	ENSMUSG00000034163
Chst1	0.00432648	0.0218205	0.029	0.01	1	ENSMUSG00000027221
Klf11	0.00433253	0.0311545	0.06	0.03	1	ENSMUSG00000020653
F2rl3	0.00433256	0.0203958	0.029	0.01	1	ENSMUSG00000050147
Ppcdc	0.00433881	0.0346987	0.058	0.029	1	ENSMUSG00000063849
Rpl29-ps2	0.00438487	-0.0147003	0.007	0.026	1	ENSMUSG00000094772
Zfhx3	0.00438868	0.0864709	0.237	0.176	1	ENSMUSG00000038872
AC164623.1	0.00440845	-0.0348003	0.001	0.015	1	ENSMUSG00000112907
Gm8482	0.00443381	-0.00794996	0.001	0.015	1	ENSMUSG00000082604
4930556M19Rik	0.00444363	0.0484548	0.03	0.011	1	ENSMUSG00000096971
52903	0.00445078	-0.0197502	0.001	0.015	1	NA
Cers4	0.00446026	0.0749389	0.186	0.132	1	ENSMUSG00000008206
Myc	0.00447881	0.0417925	0.078	0.045	1	ENSMUSG00000022346
Adck1	0.00451045	0.0350339	0.03	0.011	1	ENSMUSG00000021044
Cdipt	0.00451322	0.0527158	0.254	0.185	1	ENSMUSG00000030682
Mpnd	0.0045295	0.0524515	0.093	0.056	1	ENSMUSG00000003199
Gak	0.00453294	0.0190405	0.145	0.095	1	ENSMUSG00000062234
Cpsf4	0.00457293	0.0291286	0.051	0.024	1	ENSMUSG00000029625
Fkbp11	0.00457818	0.0280043	0.03	0.011	1	ENSMUSG00000003355
Actr5	0.00458275	0.0296648	0.022	0.006	1	ENSMUSG00000037761
Efr3a	0.00460294	0.0813153	0.311	0.242	1	ENSMUSG00000015002
Rpl30	0.00462789	-0.0811605	0.792	0.798	1	ENSMUSG00000058600
Plscr3	0.00465162	0.0903078	0.327	0.247	1	ENSMUSG00000019461
Nop53	0.00470826	0.0759077	0.269	0.201	1	ENSMUSG00000041560
Stx4a	0.00471277	0.0592321	0.176	0.122	1	ENSMUSG00000030805
Snhg3	0.00471413	0.0427636	0.152	0.102	1	ENSMUSG00000085241
Zkscan5	0.0047164	0.0216975	0.03	0.011	1	ENSMUSG00000055991
Bcl2l13	0.00478949	0.032583	0.097	0.059	1	ENSMUSG00000009112
Rps9	0.00487484	-0.0464914	0.877	0.867	1	ENSMUSG00000006333
Ntan1	0.00487634	0.0535949	0.338	0.257	1	ENSMUSG00000022681
Plekhj1	0.00490743	0.0690601	0.096	0.059	1	ENSMUSG00000035278
Tmem132a	0.0049311	0.0327912	0.032	0.012	1	ENSMUSG00000024736
Gm5459	0.00497633	-0.0126292	0.009	0.028	1	ENSMUSG00000090305
S100a6	0.00503233	-0.166671	0.382	0.435	1	ENSMUSG00000001025
Sp3os	0.00506134	0.0248445	0.032	0.012	1	ENSMUSG00000063714
Rps23-ps2	0.00510949	-0.133533	0.302	0.358	1	ENSMUSG00000066902
Csrp2	0.00512011	0.0593426	0.103	0.065	1	ENSMUSG00000020186
Fxr2	0.00513037	0.0503777	0.164	0.112	1	ENSMUSG00000018765
Tspan7	0.00513272	-0.120875	0.531	0.574	1	ENSMUSG00000058254
Rpl3-ps1	0.0051768	-0.119114	0.329	0.381	1	ENSMUSG00000084349
U2af1l4.1	0.00519508	0.0496272	0.116	0.075	1	NA
Crispld1	0.00521513	0.0634588	0.289	0.219	1	ENSMUSG00000025776
Rab5a	0.00522717	0.0417095	0.151	0.101	1	ENSMUSG00000017831
H2-Q6	0.00524242	0.0916121	0.283	0.221	1	ENSMUSG00000073409
Oaf	0.00526038	0.0615889	0.173	0.121	1	ENSMUSG00000032014
Dnajc19	0.00528643	0.0635618	0.17	0.119	1	ENSMUSG00000027679
Tmed9	0.00528685	0.0868747	0.456	0.362	1	ENSMUSG00000058569
Dhcr7	0.00529973	0.0313523	0.033	0.013	1	ENSMUSG00000058454
Emcn	0.00530776	0.107422	0.595	0.485	1	ENSMUSG00000054690
Gtf3c6	0.00532153	0.0426823	0.11	0.07	1	ENSMUSG00000019837
Stk16	0.00532897	0.0520751	0.083	0.049	1	ENSMUSG00000026201
Flrt2	0.00534907	0.0615498	0.083	0.049	1	ENSMUSG00000047414
Timm17b	0.00537295	0.0443519	0.09	0.054	1	ENSMUSG00000031158
Rnf38	0.00539801	0.0371477	0.119	0.076	1	ENSMUSG00000035696
Ddost	0.00540141	0.0717378	0.289	0.215	1	ENSMUSG00000028757
Soat1	0.00540571	0.0444282	0.1	0.062	1	ENSMUSG00000026600
Sdccag3	0.00540748	0.0589818	0.08	0.047	1	ENSMUSG00000026927
Cspp1	0.00542082	0.0553829	0.097	0.06	1	ENSMUSG00000056763
Pex19	0.00542781	0.0661304	0.189	0.135	1	ENSMUSG00000003464
C430049B03Rik	0.00543829	0.0603129	0.055	0.028	1	ENSMUSG00000087365
Arhgef2	0.00545132	0.0490305	0.292	0.218	1	ENSMUSG00000028059
Dennd4b	0.00545687	0.0514587	0.064	0.034	1	ENSMUSG00000042404
Gm26714	0.00547654	-0.0250525	0	0.011	1	ENSMUSG00000097654
Gm28555	0.00547654	-0.0130807	0	0.011	1	ENSMUSG00000101597
Grik2	0.00547654	-0.0195478	0	0.011	1	ENSMUSG00000056073
CT009713.5	0.00547654	-0.023522	0	0.011	1	ENSMUSG00000114665
Pkp2	0.00547654	-0.0236774	0	0.011	1	ENSMUSG00000041957
Tnfaip2	0.0054929	0.0721999	0.379	0.288	1	ENSMUSG00000021281
Phf12	0.00550605	0.0306908	0.208	0.149	1	ENSMUSG00000037791
Gna13	0.0055125	0.0402192	0.234	0.169	1	ENSMUSG00000020611
Map4k5	0.00551306	0.0805035	0.376	0.295	1	ENSMUSG00000034761
Pdcd2l	0.00554793	0.0400901	0.061	0.032	1	ENSMUSG00000002635
Phc1	0.00558734	0.0456608	0.061	0.032	1	ENSMUSG00000040669
Psd3	0.00559746	0.0287319	0.036	0.015	1	ENSMUSG00000030465
Cplx2	0.00561179	0.0339233	0.067	0.036	1	ENSMUSG00000025867
Rnasek	0.00562026	-0.139059	0.361	0.406	1	ENSMUSG00000093989
Crebrf	0.0056303	0.0348614	0.205	0.146	1	ENSMUSG00000048249
Tmem2	0.00564753	0.0609847	0.395	0.311	1	ENSMUSG00000024754
Ctnnal1	0.00565214	-0.143243	0.167	0.213	1	ENSMUSG00000038816
Kdm4a	0.00566808	0.0442832	0.064	0.034	1	ENSMUSG00000033326
Pkig	0.00568024	0.0424344	0.206	0.146	1	ENSMUSG00000035268
B4galt3	0.00570791	0.0325507	0.06	0.031	1	ENSMUSG00000052423
Mgp	0.00571147	-0.174723	0.212	0.267	1	ENSMUSG00000030218
Fam98b	0.00571243	0.0776338	0.126	0.084	1	ENSMUSG00000027349
Ube2v1	0.00571252	0.06399	0.271	0.204	1	ENSMUSG00000078923
Cpt1c	0.00572118	0.0145124	0.017	0.004	1	ENSMUSG00000007783
Mical3	0.0057314	0.0552751	0.081	0.048	1	ENSMUSG00000051586
Dnmt1	0.00574125	0.0556638	0.107	0.068	1	ENSMUSG00000004099
Tbc1d17	0.00578669	0.0432396	0.052	0.026	1	ENSMUSG00000038520
Amer1	0.00579378	0.0212437	0.035	0.014	1	ENSMUSG00000050332
52625	0.00579996	-0.0306315	0.004	0.02	1	NA
Ndufa10	0.00580648	0.0633672	0.255	0.189	1	ENSMUSG00000026260
Cysltr2	0.00580713	0.0131807	0.017	0.004	1	ENSMUSG00000033470
Ovgp1	0.00581288	0.030608	0.013	0.002	1	ENSMUSG00000074340
Dclre1c	0.00582593	0.0192737	0.013	0.002	1	ENSMUSG00000026648
Rps16	0.00584084	-0.0823362	0.82	0.837	1	ENSMUSG00000037563
Sertad1	0.00584149	0.0267436	0.087	0.052	1	ENSMUSG00000008384
Fen1	0.00584195	0.039239	0.057	0.029	1	ENSMUSG00000024742
Cyb561	0.00584536	-0.0525124	0.032	0.062	1	ENSMUSG00000019590
Gm13586	0.0058726	-0.0137834	0.004	0.02	1	ENSMUSG00000082931
Fbl	0.00590846	0.0621698	0.112	0.072	1	ENSMUSG00000046865
Xpc	0.00592101	0.0335299	0.136	0.09	1	ENSMUSG00000030094
Mrpl34	0.00592901	0.0380062	0.081	0.048	1	ENSMUSG00000034880
AC122302.1	0.00593128	0.0238604	0.013	0.002	1	ENSMUSG00000113265
Traf3ip1	0.00593177	0.0291251	0.038	0.016	1	ENSMUSG00000034292
Xab2	0.00593839	0.0441956	0.052	0.026	1	ENSMUSG00000019470
Lin37	0.00594874	0.0371232	0.039	0.017	1	ENSMUSG00000036845
Baiap2	0.00595297	0.0448659	0.049	0.024	1	ENSMUSG00000025372
D5Ertd605e	0.00595789	0.0165285	0.013	0.002	1	ENSMUSG00000106820
Trim27	0.00596071	0.0420738	0.119	0.077	1	ENSMUSG00000021326
Gm10335	0.00597453	-0.101909	0.258	0.315	1	ENSMUSG00000071532
Rhbdf1	0.00597689	0.038759	0.131	0.086	1	ENSMUSG00000020282
Tkt	0.00598312	0.0601528	0.18	0.128	1	ENSMUSG00000021957
Smim5	0.0059846	0.0155529	0.013	0.002	1	ENSMUSG00000048442
Ubxn2a	0.00600921	-0.0940285	0.086	0.127	1	ENSMUSG00000020634
Gchfr	0.00600992	0.0665908	0.104	0.067	1	ENSMUSG00000046814
Nfil3	0.00601257	0.0418321	0.046	0.022	1	ENSMUSG00000056749
Cwf19l2	0.00601501	0.0683805	0.12	0.079	1	ENSMUSG00000025898
Flt4	0.0060157	0.0985511	0.47	0.384	1	ENSMUSG00000020357
Mettl7a3	0.00602117	-0.0440893	0.007	0.025	1	ENSMUSG00000058057
Ddx3x	0.0060304	-0.117706	0.536	0.557	1	ENSMUSG00000000787
Pepd	0.00603249	0.0456558	0.058	0.03	1	ENSMUSG00000063931
Chmp1b	0.00604339	0.0408855	0.148	0.099	1	ENSMUSG00000109901
Arf1	0.00605097	-0.053901	0.859	0.84	1	ENSMUSG00000048076
Slc38a7	0.00606388	0.0287119	0.051	0.025	1	ENSMUSG00000036534
Prr5l	0.00606469	0.0664609	0.1	0.063	1	ENSMUSG00000032841
Rab40c	0.00607282	0.0465763	0.077	0.045	1	ENSMUSG00000025730
Eif2b4	0.00608343	0.0456085	0.107	0.068	1	ENSMUSG00000029145
Itm2c	0.00609293	-0.0884097	0.678	0.679	1	ENSMUSG00000026223
Ccdc85a	0.00610954	0.0301926	0.044	0.02	1	ENSMUSG00000032878
Slc43a2	0.00612531	0.0721015	0.118	0.077	1	ENSMUSG00000038178
Srsf10	0.00612758	-0.124073	0.148	0.194	1	ENSMUSG00000028676
Sh3tc1	0.00614381	0.0630737	0.244	0.181	1	ENSMUSG00000036553
Ddx56	0.00616384	0.0428848	0.052	0.026	1	ENSMUSG00000004393
Eif2b2	0.00616384	0.0434618	0.052	0.026	1	ENSMUSG00000004788
Ripk2	0.00616528	0.0349384	0.042	0.019	1	ENSMUSG00000041135
Txndc16	0.00617893	0.0379915	0.06	0.031	1	ENSMUSG00000021830
Apc	0.00620427	-0.15491	0.177	0.219	1	ENSMUSG00000005871
Eef1b2	0.00620502	-0.0743144	0.729	0.695	1	ENSMUSG00000025967
Micall1	0.00621221	0.0554266	0.115	0.074	1	ENSMUSG00000033039
Kmt5c	0.00623118	0.0401779	0.058	0.03	1	ENSMUSG00000059851
Cdk5rap1	0.0062803	0.0197325	0.025	0.008	1	ENSMUSG00000027487
Gm28036	0.00628349	0.0440654	0.28	0.21	1	ENSMUSG00000098950
Glod4	0.00630284	0.0488026	0.165	0.115	1	ENSMUSG00000017286
Cdk17	0.00630967	0.0736156	0.21	0.155	1	ENSMUSG00000020015
Bmp1	0.00631586	0.0497762	0.091	0.056	1	ENSMUSG00000022098
Itga6	0.00632017	0.0903088	0.482	0.388	1	ENSMUSG00000027111
Stmn2	0.00635104	-0.159283	0.134	0.177	1	ENSMUSG00000027500
Gm4963	0.00638388	-0.0457331	0.028	0.055	1	ENSMUSG00000063739
Ogfr	0.00639141	0.0602134	0.094	0.059	1	ENSMUSG00000049401
Nlrc3	0.00642491	0.0447076	0.083	0.05	1	ENSMUSG00000049871
Slc20a1	0.00642803	0.0418367	0.102	0.064	1	ENSMUSG00000027397
Sfn	0.00643196	0.031958	0.048	0.023	1	ENSMUSG00000047281
Taf1b	0.00645414	0.0551336	0.071	0.04	1	ENSMUSG00000059669
Tbcel	0.00647308	0.0548637	0.147	0.099	1	ENSMUSG00000037287
Retreg3	0.0064894	0.0302906	0.145	0.098	1	ENSMUSG00000017802
Pitpnc1	0.0065089	0.060303	0.357	0.28	1	ENSMUSG00000040430
Cachd1	0.00651317	0.0272392	0.042	0.019	1	ENSMUSG00000028532
St6galnac4	0.00651449	0.0394114	0.094	0.058	1	ENSMUSG00000079442
2700081O15Rik	0.00652555	0.0270573	0.28	0.205	1	ENSMUSG00000053080
Cerk	0.00654745	0.0503172	0.109	0.07	1	ENSMUSG00000035891
Rfc1	0.00659492	0.0660707	0.154	0.106	1	ENSMUSG00000029191
Egr2	0.00659754	0.022843	0.042	0.019	1	ENSMUSG00000037868
Igf1	0.00662794	0.0576594	0.068	0.038	1	ENSMUSG00000020053
Gm24305	0.00662924	-0.0566754	0.028	0.055	1	ENSMUSG00000095590
Gm7964	0.00668202	-0.0556898	0.026	0.053	1	ENSMUSG00000063902
Sele	0.00668413	-0.108677	0.078	0.117	1	ENSMUSG00000026582
Stim1	0.00669512	0.0637968	0.289	0.217	1	ENSMUSG00000030987
Pcx	0.00671044	0.0353614	0.026	0.009	1	ENSMUSG00000024892
Txlna	0.00671052	0.0598603	0.2	0.145	1	ENSMUSG00000053841
Dido1	0.00673481	-0.0677602	0.036	0.066	1	ENSMUSG00000038914
Clptm1l	0.00676438	0.0496229	0.165	0.114	1	ENSMUSG00000021610
Leprotl1	0.00677231	0.0857235	0.216	0.16	1	ENSMUSG00000031513
Mex3b	0.00677346	0.0281142	0.06	0.031	1	ENSMUSG00000057706
Ptdss2	0.00681934	0.055459	0.081	0.049	1	ENSMUSG00000025495
Hyou1	0.00682453	0.0624527	0.106	0.068	1	ENSMUSG00000032115
Ramp3	0.00683178	0.0723087	0.212	0.154	1	ENSMUSG00000041046
52641	0.00684484	0.0171884	0.026	0.009	1	NA
Sys1	0.00684804	0.019145	0.08	0.047	1	ENSMUSG00000045503
Qars	0.00687841	0.0419752	0.074	0.043	1	ENSMUSG00000032604
Iqsec1	0.00688599	0.0592472	0.141	0.095	1	ENSMUSG00000034312
Serf1	0.00691019	0.0234469	0.045	0.021	1	ENSMUSG00000021643
Ndufa3	0.00694933	0.0720171	0.396	0.312	1	ENSMUSG00000035674
Pdk4	0.00696003	0.0333372	0.019	0.005	1	ENSMUSG00000019577
Sec14l2	0.00696003	0.0231823	0.019	0.005	1	ENSMUSG00000003585
Adgra2	0.00696131	0.0409218	0.145	0.098	1	ENSMUSG00000031486
Zdhhc1	0.00698365	0.0361699	0.07	0.039	1	ENSMUSG00000039199
Agrn	0.00700089	0.0346705	0.192	0.135	1	ENSMUSG00000041936
Atxn2l	0.00702876	0.0580312	0.229	0.169	1	ENSMUSG00000032637
Laptm4a	0.00703257	-0.0354487	0.882	0.842	1	ENSMUSG00000020585
Wbscr22	0.00704114	0.0481418	0.083	0.05	1	ENSMUSG00000005378
Gm13142	0.00705671	0.0163434	0.019	0.005	1	ENSMUSG00000081405
Tsen2	0.00706887	0.0217996	0.019	0.005	1	ENSMUSG00000042389
Tnpo3	0.0070767	0.0381847	0.119	0.078	1	ENSMUSG00000012535
AC207128.2	0.00708106	0.0300287	0.019	0.005	1	ENSMUSG00000114836
Zfp821	0.00711275	0.0272831	0.028	0.01	1	ENSMUSG00000031728
Slc15a2	0.00712279	-0.0440909	0.006	0.022	1	ENSMUSG00000022899
Trps1	0.00716076	0.0578192	0.087	0.053	1	ENSMUSG00000038679
Gm11449	0.00723608	-0.0133768	0.006	0.022	1	ENSMUSG00000083374
Sap130	0.00724019	0.0428455	0.068	0.038	1	ENSMUSG00000024260
Col8a1	0.00726306	-0.13436	0.104	0.148	1	ENSMUSG00000068196
Rad23a	0.00728115	0.0799196	0.216	0.159	1	ENSMUSG00000003813
Smap1	0.0073012	0.0347457	0.205	0.147	1	ENSMUSG00000026155
Ccdc25	0.00731729	0.0564862	0.126	0.084	1	ENSMUSG00000022035
Gps1	0.00732546	0.0812941	0.176	0.126	1	ENSMUSG00000025156
Csrnp1	0.00733427	0.0510724	0.112	0.073	1	ENSMUSG00000032515
2410006H16Rik	0.00733656	0.0557916	0.142	0.098	1	ENSMUSG00000086841
Rnf34	0.00733888	0.0413705	0.067	0.037	1	ENSMUSG00000029474
Coq2	0.00734077	0.0476223	0.138	0.093	1	ENSMUSG00000029319
Ldlrap1	0.00734636	0.0341012	0.116	0.075	1	ENSMUSG00000037295
Olfr1385	0.00734668	0.026908	0.06	0.032	1	ENSMUSG00000059729
Slc25a33	0.00735551	0.0156962	0.007	0	1	ENSMUSG00000028982
Gm44639	0.00735551	0.00833237	0.007	0	1	ENSMUSG00000108521
Gm7434	0.00735551	0.0160368	0.007	0	1	ENSMUSG00000109241
3110053B16Rik	0.00735551	0.0147301	0.007	0	1	ENSMUSG00000085642
Gm8750	0.00735551	0.00871353	0.007	0	1	ENSMUSG00000092560
Gm8752	0.00735551	0.00871353	0.007	0	1	ENSMUSG00000092278
Pim2	0.00735551	0.0184363	0.007	0	1	ENSMUSG00000031155
5930412G12Rik	0.00735551	0.00876442	0.007	0	1	ENSMUSG00000072591
Col28a1	0.00735551	0.0128952	0.007	0	1	ENSMUSG00000068794
Pianp	0.00735551	0.0295126	0.007	0	1	ENSMUSG00000030329
Tmc7	0.00735551	0.0131031	0.007	0	1	ENSMUSG00000042246
Gm26542	0.00735551	0.00883673	0.007	0	1	ENSMUSG00000097887
Proser1	0.0073656	0.0434774	0.096	0.06	1	ENSMUSG00000049504
Slc25a1	0.00737599	0.0624751	0.134	0.09	1	ENSMUSG00000003528
Npc1	0.00737676	0.0413902	0.083	0.05	1	ENSMUSG00000024413
Vta1	0.0074119	0.0525054	0.149	0.103	1	ENSMUSG00000019868
Cdc42bpb	0.00744243	0.0626612	0.164	0.116	1	ENSMUSG00000021279
Sema6c	0.0074581	0.0235162	0.01	0.001	1	ENSMUSG00000038777
Gm43362	0.0074964	0.0249596	0.01	0.001	1	ENSMUSG00000105201
AC153143.1	0.0074964	0.0168862	0.01	0.001	1	ENSMUSG00000113183
Chad	0.00751385	0.0570914	0.087	0.053	1	ENSMUSG00000039084
Zbtb48	0.00751562	0.0136609	0.01	0.001	1	ENSMUSG00000028952
Zbtb49	0.00751562	0.0149649	0.01	0.001	1	ENSMUSG00000029127
Gm11970	0.00751562	0.0115237	0.01	0.001	1	ENSMUSG00000079988
Gata2	0.00751721	-0.166217	0.237	0.278	1	ENSMUSG00000015053
Mnat1	0.0075305	0.0729714	0.152	0.106	1	ENSMUSG00000021103
Gm26825	0.00753488	0.013759	0.01	0.001	1	ENSMUSG00000097554
Rhoj	0.00754033	-0.126568	0.52	0.534	1	ENSMUSG00000046768
Txndc11	0.00756934	0.0301711	0.067	0.037	1	ENSMUSG00000022498
Odf2	0.00758625	0.0374483	0.068	0.038	1	ENSMUSG00000026790
Ankrd16	0.00758854	0.0618926	0.094	0.059	1	ENSMUSG00000047909
Gpx3	0.00763936	0.0674248	0.078	0.047	1	ENSMUSG00000018339
Cyb5r1	0.00765068	0.0860839	0.18	0.13	1	ENSMUSG00000026456
Taok3	0.00768119	0.0376303	0.115	0.074	1	ENSMUSG00000061288
Prrg3	0.00770887	0.0577128	0.077	0.046	1	ENSMUSG00000033361
Dpysl3	0.0077557	0.0544096	0.12	0.08	1	ENSMUSG00000024501
Zswim6	0.00776113	0.0762997	0.267	0.202	1	ENSMUSG00000032846
Mnt	0.00777672	0.0471325	0.078	0.047	1	ENSMUSG00000000282
Ckb	0.00779401	0.0449995	0.16	0.111	1	ENSMUSG00000001270
Atf4	0.00780719	0.097622	0.437	0.35	1	ENSMUSG00000042406
Pold4	0.00784821	0.0497427	0.125	0.083	1	ENSMUSG00000024854
Bok	0.00784983	0.0512609	0.099	0.063	1	ENSMUSG00000026278
Srgap1	0.00784998	0.0779597	0.187	0.136	1	ENSMUSG00000020121
Smarca4	0.00787328	0.0220485	0.187	0.132	1	ENSMUSG00000032187
Tmcc3	0.00787869	0.0395271	0.338	0.263	1	ENSMUSG00000020023
Acan	0.00789792	0.0825521	0.071	0.041	1	ENSMUSG00000030607
Cmas	0.00795416	0.0382127	0.179	0.126	1	ENSMUSG00000030282
Akt1	0.00795475	0.080302	0.45	0.357	1	ENSMUSG00000001729
Knop1	0.00796614	0.0670344	0.261	0.194	1	ENSMUSG00000030980
Aifm1	0.00796978	0.0610267	0.115	0.075	1	ENSMUSG00000036932
Gm6344	0.00797667	-0.0189273	0.03	0.059	1	ENSMUSG00000094446
Eif4a1	0.00798713	0.080173	0.57	0.48	1	ENSMUSG00000059796
Ptprm	0.00803628	0.0423988	0.261	0.194	1	ENSMUSG00000033278
Chmp1a	0.00803821	0.0684913	0.151	0.105	1	ENSMUSG00000000743
Gm20431	0.00804707	0.0645951	0.258	0.195	1	ENSMUSG00000089739
Ercc3	0.00809788	0.0401065	0.139	0.094	1	ENSMUSG00000024382
1110065P20Rik	0.00810608	0.0309143	0.065	0.036	1	ENSMUSG00000078570
Cpa3	0.00810911	-0.0231764	0	0.01	1	ENSMUSG00000001865
Gm25099	0.00810911	-0.0208612	0	0.01	1	ENSMUSG00000095676
Lingo1	0.00810911	-0.0242962	0	0.01	1	ENSMUSG00000049556
Ccl4	0.00810911	-0.0308172	0	0.01	1	ENSMUSG00000018930
A630072L19Rik	0.00810911	-0.0233866	0	0.01	1	ENSMUSG00000097160
51444	0.00810911	-0.0206567	0	0.01	1	NA
Rhag	0.00810911	-0.0340468	0	0.01	1	ENSMUSG00000023926
Xlr5a	0.00810911	-0.0116697	0	0.01	1	ENSMUSG00000058328
Psmb4	0.00812305	0.0506665	0.415	0.323	1	ENSMUSG00000005779
Stard3	0.00816028	0.0572627	0.148	0.102	1	ENSMUSG00000018167
Tom1l2	0.00816286	0.0351138	0.126	0.084	1	ENSMUSG00000000538
BC028528	0.00818289	0.0596408	0.183	0.132	1	ENSMUSG00000038543
Txnip	0.00819929	0.0934962	0.776	0.684	1	ENSMUSG00000038393
Frat2	0.00820083	0.0126405	0.029	0.011	1	ENSMUSG00000047604
Chst15	0.00821094	0.0562539	0.438	0.345	1	ENSMUSG00000030930
Hdac4	0.00822606	0.041764	0.091	0.057	1	ENSMUSG00000026313
Decr2	0.00822908	0.0377358	0.097	0.061	1	ENSMUSG00000036775
Chic1	0.00824301	0.052199	0.033	0.014	1	ENSMUSG00000031327
Dusp16	0.00824525	0.0384181	0.06	0.032	1	ENSMUSG00000030203
Hey1	0.00825313	-0.11523	0.073	0.109	1	ENSMUSG00000040289
Fh1	0.00827262	0.0196841	0.097	0.061	1	ENSMUSG00000026526
Nsrp1	0.00829047	0.0669666	0.202	0.147	1	ENSMUSG00000037958
Gm24407	0.0083138	-0.0295391	0.012	0.031	1	ENSMUSG00000094377
Ifi35	0.00831439	0.0414295	0.123	0.082	1	ENSMUSG00000010358
Babam2	0.00837278	-0.10046	0.064	0.099	1	ENSMUSG00000052139
Zfp281	0.00837736	0.0427383	0.12	0.079	1	ENSMUSG00000041483
Anp32e	0.00838137	0.0265781	0.193	0.136	1	ENSMUSG00000015749
Lrrc2	0.00838534	0.021758	0.015	0.003	1	ENSMUSG00000032495
Hmbox1	0.00839179	0.0332957	0.123	0.081	1	ENSMUSG00000021972
Ube2l6	0.00839315	0.033401	0.171	0.121	1	ENSMUSG00000027078
Stx3	0.0084034	0.0485777	0.054	0.028	1	ENSMUSG00000041488
Arap3	0.00842566	0.0889107	0.329	0.258	1	ENSMUSG00000024451
Zc3h15	0.00842911	0.048103	0.257	0.192	1	ENSMUSG00000027091
51362	0.00843126	0.0245919	0.02	0.006	1	NA
Slc9a3r2	0.00844102	-0.159038	0.502	0.51	1	ENSMUSG00000002504
Mocs3	0.00844481	0.0192115	0.02	0.006	1	ENSMUSG00000074576
Zfp781	0.00844481	0.0162639	0.02	0.006	1	ENSMUSG00000096718
Ermp1	0.00846412	0.0636175	0.112	0.074	1	ENSMUSG00000046324
Nox4	0.00846908	0.0190746	0.015	0.003	1	ENSMUSG00000030562
Sox11	0.00849718	0.0508332	0.103	0.066	1	ENSMUSG00000063632
Nfatc4	0.00850279	0.0182328	0.015	0.003	1	ENSMUSG00000023411
Thop1	0.00853661	0.0156076	0.015	0.003	1	ENSMUSG00000004929
Spata24	0.00854018	0.0158609	0.02	0.006	1	ENSMUSG00000024352
Gja5	0.00855343	-0.164146	0.081	0.118	1	ENSMUSG00000057123
Rasgrp2	0.00855859	0.0670002	0.097	0.062	1	ENSMUSG00000032946
2009-09-01	0.0085818	0.0500268	0.206	0.149	1	ENSMUSG00000059248
Gm28037	0.00861391	-0.113856	0.438	0.475	1	ENSMUSG00000098371
Cactin	0.00861831	0.0425688	0.054	0.028	1	ENSMUSG00000034889
Borcs7	0.00862777	0.0429318	0.049	0.025	1	ENSMUSG00000062376
Mgea5	0.00862964	0.0684861	0.229	0.171	1	ENSMUSG00000025220
Slc26a2	0.0086568	0.0775756	0.163	0.116	1	ENSMUSG00000034320
Ptp4a3	0.00869565	0.0742295	0.255	0.196	1	ENSMUSG00000059895
Slc5a3	0.00870881	0.0431987	0.058	0.031	1	ENSMUSG00000089774
Map1lc3a	0.00872165	0.0610996	0.219	0.161	1	ENSMUSG00000027602
Alkbh8	0.00874821	0.0348788	0.057	0.03	1	ENSMUSG00000025899
Endou	0.00878098	0.0731541	0.148	0.103	1	ENSMUSG00000022468
Wbp1	0.00879499	0.0500795	0.071	0.041	1	ENSMUSG00000030035
Agpat1	0.00883009	0.0457736	0.17	0.121	1	ENSMUSG00000034254
Gas1	0.00887909	0.0480001	0.035	0.015	1	ENSMUSG00000052957
Hsp90b1	0.00889726	-0.083515	0.785	0.769	1	ENSMUSG00000020048
Peg13	0.00893836	0.0786353	0.254	0.194	1	ENSMUSG00000106847
Egr1	0.00894411	0.102608	0.316	0.251	1	ENSMUSG00000038418
Ppic	0.00896823	0.107921	0.633	0.547	1	ENSMUSG00000024538
Nfrkb	0.00896913	0.0508417	0.048	0.024	1	ENSMUSG00000042185
Kiz	0.00899298	0.0469292	0.041	0.019	1	ENSMUSG00000074749
Esm1	0.00899338	0.0284652	0.055	0.029	1	ENSMUSG00000042379
Gramd1b	0.00902308	0.0327249	0.035	0.015	1	ENSMUSG00000040111
Ttf2	0.00905086	0.0233251	0.033	0.014	1	ENSMUSG00000033222
Nlrx1	0.00905296	0.0621422	0.046	0.023	1	ENSMUSG00000032109
Tars2	0.0090542	0.0264738	0.035	0.015	1	ENSMUSG00000028107
Pabpc4l	0.00905881	0.039648	0.057	0.03	1	ENSMUSG00000090919
Mmd	0.0090809	0.0375111	0.135	0.092	1	ENSMUSG00000003948
Mfap3	0.00910806	0.0361199	0.254	0.189	1	ENSMUSG00000020522
Lrp5	0.00915228	0.0648315	0.26	0.197	1	ENSMUSG00000024913
Zfp69	0.00915865	0.0251502	0.035	0.015	1	ENSMUSG00000064141
Nr2f2	0.00915943	0.0666654	0.361	0.282	1	ENSMUSG00000030551
Tmem43	0.00917301	0.0359839	0.113	0.074	1	ENSMUSG00000030095
Rpl37	0.00919504	0.0901616	0.858	0.768	1	ENSMUSG00000041841
A430105I19Rik	0.00919808	0.0428878	0.171	0.12	1	ENSMUSG00000045838
Hist1h2ap	0.00920023	-0.0321658	0.023	0.048	1	ENSMUSG00000094777
Il2	0.00921798	0.0457487	0.106	0.069	1	ENSMUSG00000027720
Ap1ar	0.00923103	0.0280352	0.102	0.065	1	ENSMUSG00000074238
Ppp2r3d	0.00923381	0.0294804	0.057	0.03	1	ENSMUSG00000093803
Cmtr2	0.00924528	-0.0330174	0.003	0.016	1	ENSMUSG00000046441
Slfn2	0.00926697	0.0415639	0.039	0.018	1	ENSMUSG00000072620
Hnrnpc	0.00929433	-0.0833533	0.655	0.658	1	ENSMUSG00000060373
Zswim4	0.00932896	0.0332024	0.036	0.016	1	ENSMUSG00000035671
Prkcsh	0.00938635	0.0635024	0.131	0.089	1	ENSMUSG00000003402
Chd3	0.00939213	0.0596246	0.168	0.119	1	ENSMUSG00000018474
Ap1s1	0.00940054	0.0160661	0.12	0.08	1	ENSMUSG00000004849
Pelp1	0.00940643	0.0419222	0.049	0.025	1	ENSMUSG00000018921
Madd	0.00943565	0.0304092	0.045	0.022	1	ENSMUSG00000040687
Rnf14	0.00943786	0.0540907	0.203	0.149	1	ENSMUSG00000060450
Magix	0.0094484	0.0740088	0.097	0.063	1	ENSMUSG00000031147
Dph7	0.00945684	0.0199512	0.035	0.015	1	ENSMUSG00000026975
Diaph2	0.00946176	-0.143154	0.215	0.258	1	ENSMUSG00000034480
Kat7	0.0094861	0.0555247	0.126	0.085	1	ENSMUSG00000038909
Zfp46	0.00948722	0.0282447	0.081	0.049	1	ENSMUSG00000051351
Mbtd1	0.00949311	0.0383672	0.109	0.071	1	ENSMUSG00000059474
Rnu12	0.00950406	-0.0303892	0.001	0.013	1	ENSMUSG00000065176
Kctd17	0.00954902	0.0501122	0.161	0.114	1	ENSMUSG00000033287
Actr3	0.00956311	-0.112666	0.565	0.57	1	ENSMUSG00000026341
Ltbp4	0.00956568	-0.151263	0.434	0.482	1	ENSMUSG00000040488
Dffb	0.00957633	0.0175236	0.035	0.015	1	ENSMUSG00000029027
9030617O03Rik	0.00958644	0.0256079	0.044	0.021	1	ENSMUSG00000021185
Def8	0.00959272	0.0336636	0.049	0.025	1	ENSMUSG00000001482
Tecpr1	0.00963025	0.0356346	0.099	0.063	1	ENSMUSG00000066621
2810402E24Rik	0.00964958	0.0394587	0.055	0.029	1	ENSMUSG00000099966
Cc2d1b	0.00966514	0.0407973	0.041	0.019	1	ENSMUSG00000028582
Prob1	0.00966706	-0.0223056	0.001	0.013	1	ENSMUSG00000073600
Elmo1	0.00968102	0.0803953	0.218	0.164	1	ENSMUSG00000041112
Fahd1	0.00968771	0.0248065	0.048	0.024	1	ENSMUSG00000045316
Snrnp40	0.00969538	0.00497076	0.083	0.05	1	ENSMUSG00000074088
Gm19590	0.00972397	0.0207297	0.022	0.007	1	ENSMUSG00000107061
Hexa	0.00977068	0.0739804	0.176	0.128	1	ENSMUSG00000025232
Dstyk	0.0097723	0.0337637	0.104	0.067	1	ENSMUSG00000042046
Nsun4	0.00977634	0.0289186	0.041	0.019	1	ENSMUSG00000028706
E2f7	0.00979141	0.028036	0.049	0.025	1	ENSMUSG00000020185
Fxyd5	0.00981439	-0.131992	0.418	0.45	1	ENSMUSG00000009687
Tcta	0.00981968	0.0403719	0.074	0.044	1	ENSMUSG00000039461
Gdpd5	0.00982334	0.0286475	0.045	0.022	1	ENSMUSG00000035314
Slc6a6	0.00984331	-0.14622	0.467	0.509	1	ENSMUSG00000030096
Pspc1	0.00984769	0.0307323	0.041	0.019	1	ENSMUSG00000021938
Gm5576	0.0098568	0.00831794	0.022	0.007	1	ENSMUSG00000108045
Cmtm3	0.00989193	0.0896858	0.517	0.421	1	ENSMUSG00000031875
Gm10073	0.00990478	0.0883697	0.119	0.081	1	ENSMUSG00000060019
Gpr107	0.00991585	0.0551998	0.183	0.132	1	ENSMUSG00000000194
Prag1	0.00994636	0.0459143	0.068	0.039	1	ENSMUSG00000050271
Rufy1	0.00995896	-0.0740974	0.041	0.07	1	ENSMUSG00000020375
Por	0.00999753	0.0501086	0.081	0.05	1	ENSMUSG00000005514
Rbm4b	0.0100194	0.0346458	0.067	0.038	1	ENSMUSG00000033760
Phf6	0.0100372	0.0305487	0.045	0.022	1	ENSMUSG00000025626
Fos	0.0100445	0.11404	0.57	0.495	1	ENSMUSG00000021250
Gm26532	0.0100898	0.038168	0.12	0.08	1	ENSMUSG00000097296
Xylt2	0.0100959	0.0318433	0.041	0.019	1	ENSMUSG00000020868
Brd3	0.0101151	0.0487412	0.155	0.109	1	ENSMUSG00000026918
Nat6	0.0101164	0.0753441	0.12	0.083	1	ENSMUSG00000079334
Hspb11	0.0101511	0.0117717	0.036	0.016	1	ENSMUSG00000063172
Epha2	0.0101599	0.0365671	0.125	0.084	1	ENSMUSG00000006445
Pdhx	0.0101791	0.0385863	0.065	0.037	1	ENSMUSG00000010914
Hdac3	0.0102009	0.058236	0.135	0.092	1	ENSMUSG00000024454
Gng11	0.0102656	0.0945814	0.742	0.642	1	ENSMUSG00000032766
Gtf2a1	0.0102667	0.0476377	0.112	0.074	1	ENSMUSG00000020962
Gmps	0.0103043	0.027273	0.102	0.065	1	ENSMUSG00000027823
Saraf	0.0103181	0.0560501	0.274	0.212	1	ENSMUSG00000031532
Gm24265	0.0103572	-0.0296704	0.01	0.028	1	ENSMUSG00000096243
Celf4	0.0104041	0.0259137	0.023	0.008	1	ENSMUSG00000024268
Cmtm7	0.0104392	0.0545343	0.073	0.044	1	ENSMUSG00000032436
Dlgap4	0.010449	0.0584184	0.196	0.144	1	ENSMUSG00000061689
Gm23744	0.0104545	-0.0197453	0.012	0.03	1	ENSMUSG00000077419
Mgst3	0.0104578	0.0593737	0.203	0.149	1	ENSMUSG00000026688
Tnrc18	0.0104961	0.0440598	0.12	0.081	1	ENSMUSG00000039477
Bod1	0.0105215	0.0634896	0.187	0.137	1	ENSMUSG00000044502
Gm5905	0.0105382	-0.132995	0.126	0.168	1	ENSMUSG00000110275
Cfd	0.0105859	-0.0781261	0.013	0.032	1	ENSMUSG00000061780
4930402H24Rik	0.0106431	0.0518988	0.177	0.128	1	ENSMUSG00000027309
Obsl1	0.0106454	0.0225154	0.023	0.008	1	ENSMUSG00000026211
Igfbp2	0.0106471	0.0422808	0.093	0.059	1	ENSMUSG00000039323
Inf2	0.0106793	0.0532366	0.107	0.071	1	ENSMUSG00000037679
Rps23-ps1	0.0107006	-0.0807496	0.364	0.422	1	ENSMUSG00000100755
Paxip1	0.0107635	0.0237587	0.081	0.05	1	ENSMUSG00000002221
Setdb1	0.0107644	0.022676	0.083	0.051	1	ENSMUSG00000015697
Cxxc5	0.0108149	0.0746534	0.177	0.129	1	ENSMUSG00000046668
Zmiz2	0.0108292	0.0448698	0.078	0.048	1	ENSMUSG00000041164
Cnn2	0.010853	0.0707861	0.361	0.284	1	ENSMUSG00000004665
Smim3	0.0108765	0.0139587	0.044	0.021	1	ENSMUSG00000038059
Plk2	0.0108996	0.0526453	0.357	0.276	1	ENSMUSG00000021701
Enkd1	0.0109034	0.0249392	0.016	0.004	1	ENSMUSG00000013155
Ercc1	0.0109244	0.0350171	0.094	0.06	1	ENSMUSG00000003549
Isg20l2	0.0109309	0.00563931	0.094	0.059	1	ENSMUSG00000048039
Cdc7	0.0109428	0.016019	0.016	0.004	1	ENSMUSG00000029283
Rela	0.0109519	0.0697368	0.199	0.148	1	ENSMUSG00000024927
Kif7	0.0110009	0.0138878	0.023	0.008	1	ENSMUSG00000050382
Tomm22	0.0110127	0.0426477	0.152	0.106	1	ENSMUSG00000022427
Stard8	0.0110403	0.0372516	0.183	0.133	1	ENSMUSG00000031216
Dgkh	0.0110455	0.0180705	0.154	0.107	1	ENSMUSG00000034731
Oaz2	0.0110575	0.0607038	0.229	0.171	1	ENSMUSG00000040652
Anapc5	0.0110699	0.050417	0.232	0.173	1	ENSMUSG00000029472
Smtn	0.0111031	0.0465939	0.139	0.096	1	ENSMUSG00000020439
Pfdn1	0.0111064	0.0805133	0.266	0.204	1	ENSMUSG00000024346
Pwwp2b	0.0111178	0.0349067	0.064	0.036	1	ENSMUSG00000060260
Cbr2	0.0111405	0.0338658	0.025	0.009	1	ENSMUSG00000025150
Casp7	0.0112123	0.0315965	0.128	0.086	1	ENSMUSG00000025076
Zfp871	0.0113219	0.0597422	0.152	0.107	1	ENSMUSG00000024298
Rhoc	0.0113662	0.076651	0.543	0.439	1	ENSMUSG00000002233
AI987944	0.0113664	0.0226076	0.067	0.038	1	ENSMUSG00000056383
Zfp282	0.0114286	0.0406943	0.062	0.035	1	ENSMUSG00000025821
Tmem55b	0.0114402	0.0272066	0.123	0.083	1	ENSMUSG00000035953
Hbegf	0.0114605	0.047199	0.074	0.045	1	ENSMUSG00000024486
Fhod1	0.0114659	0.041224	0.123	0.083	1	ENSMUSG00000014778
Myo6	0.0114722	0.0366148	0.212	0.157	1	ENSMUSG00000033577
Rbm39	0.011475	-0.0897021	0.633	0.623	1	ENSMUSG00000027620
Gm19246	0.0114797	-0.0508001	0.015	0.034	1	ENSMUSG00000092505
Lig4	0.0114919	0.0617826	0.055	0.03	1	ENSMUSG00000049717
Pkm	0.0115671	0.0911269	0.493	0.406	1	ENSMUSG00000032294
Sec13	0.0115861	0.0438441	0.183	0.131	1	ENSMUSG00000030298
Cdkn1a	0.0115922	0.0589436	0.248	0.19	1	ENSMUSG00000023067
Kdm5c	0.0115969	0.0158452	0.171	0.121	1	ENSMUSG00000025332
Wnt5b	0.0116315	-0.0442608	0.007	0.023	1	ENSMUSG00000030170
Il15	0.0116337	0.0342637	0.06	0.033	1	ENSMUSG00000031712
Akirin1	0.0117487	0.0365423	0.168	0.12	1	ENSMUSG00000023075
Pgp	0.0117739	0.0708242	0.096	0.062	1	ENSMUSG00000043445
Rras2	0.0117865	0.0370742	0.09	0.057	1	ENSMUSG00000055723
Mrip-ps	0.0117888	-0.0360738	0.022	0.045	1	ENSMUSG00000098404
Dync1h1	0.0117921	0.0392134	0.234	0.175	1	ENSMUSG00000018707
Card19	0.0118425	0.0151561	0.152	0.106	1	ENSMUSG00000037960
Wdsub1	0.0118902	0.0282398	0.064	0.036	1	ENSMUSG00000026988
Tmem165	0.0119008	0.0749675	0.216	0.162	1	ENSMUSG00000029234
Ulk1	0.0119164	0.0400506	0.129	0.088	1	ENSMUSG00000029512
Lipo3	0.0119327	-0.0553151	0.023	0.047	1	ENSMUSG00000024766
Zwint	0.011936	0.033833	0.184	0.132	1	ENSMUSG00000019923
Auh	0.0119403	0.0237083	0.061	0.034	1	ENSMUSG00000021460
Polb	0.0119805	0.0417208	0.054	0.029	1	ENSMUSG00000031536
Klf10	0.0119851	0.0412467	0.229	0.17	1	ENSMUSG00000037465
Gm44768	0.0119975	0.0111832	0.012	0.002	1	ENSMUSG00000108496
Kank3	0.0120145	0.0608449	0.343	0.269	1	ENSMUSG00000042099
Nthl1	0.0120237	0.019944	0.012	0.002	1	ENSMUSG00000041429
Lhx6	0.0120444	-0.0237333	0	0.009	1	ENSMUSG00000026890
1500002C15Rik	0.0120444	-0.0177845	0	0.009	1	ENSMUSG00000096221
Gm5652	0.0120444	-0.00674279	0	0.009	1	ENSMUSG00000097977
Sptb	0.0120444	-0.0245499	0	0.009	1	ENSMUSG00000021061
Xlr5b	0.0120444	-0.0116734	0	0.009	1	ENSMUSG00000072479
Washc5	0.012052	0.063356	0.132	0.092	1	ENSMUSG00000022350
Tspan31	0.0120869	0.0793813	0.266	0.207	1	ENSMUSG00000006736
Fam49b	0.0120945	0.0411407	0.052	0.028	1	ENSMUSG00000022378
Usp3	0.0121183	0.0611066	0.134	0.093	1	ENSMUSG00000032376
Kdelc1	0.0121401	0.0437733	0.11	0.073	1	ENSMUSG00000026047
Git1	0.0121531	0.057026	0.401	0.315	1	ENSMUSG00000011877
Gm10676	0.0121553	0.0202205	0.012	0.002	1	ENSMUSG00000074355
Sfrp1	0.0121553	0.0181436	0.012	0.002	1	ENSMUSG00000031548
Gosr2	0.012167	0.0603122	0.196	0.145	1	ENSMUSG00000020946
Spry1	0.0121977	0.0705555	0.147	0.104	1	ENSMUSG00000037211
Rps20	0.0122064	-0.0386734	0.911	0.901	1	ENSMUSG00000028234
Gm14401	0.0122082	0.00763932	0.012	0.002	1	ENSMUSG00000078872
Ptgis	0.0122348	0.0215594	0.012	0.002	1	ENSMUSG00000017969
5830462I19Rik	0.0122348	0.0208707	0.012	0.002	1	ENSMUSG00000091102
Ifi208	0.0122421	0.0357855	0.061	0.034	1	ENSMUSG00000066677
4833417C18Rik	0.0122614	0.0136766	0.012	0.002	1	ENSMUSG00000086015
Tfe3	0.0123049	0.0437132	0.091	0.058	1	ENSMUSG00000000134
Ago2	0.0123109	0.0373088	0.097	0.063	1	ENSMUSG00000036698
Sf3b3	0.0123137	0.0318198	0.164	0.115	1	ENSMUSG00000033732
Gm37125	0.0123148	0.0123312	0.012	0.002	1	ENSMUSG00000104351
Wdr45	0.0123496	0.0460925	0.097	0.063	1	ENSMUSG00000039382
Mdn1	0.0123597	-0.0551851	0.022	0.045	1	ENSMUSG00000058006
Pgpep1	0.0123682	0.032677	0.054	0.029	1	ENSMUSG00000056204
Hist1h2ao	0.0123748	-0.0236197	0.023	0.047	1	ENSMUSG00000094248
Arsa	0.0124197	0.0357244	0.216	0.161	1	ENSMUSG00000022620
Erg	0.0124585	-0.124963	0.373	0.403	1	ENSMUSG00000040732
Bmp2	0.0124697	0.104935	0.113	0.078	1	ENSMUSG00000027358
2010320M18Rik	0.012475	0.0351852	0.028	0.011	1	ENSMUSG00000100691
Epb41l4aos	0.0125382	0.0374262	0.071	0.043	1	ENSMUSG00000087590
Emid1	0.0126105	0.0315789	0.099	0.064	1	ENSMUSG00000034164
Mbd6	0.0126143	0.037625	0.163	0.114	1	ENSMUSG00000025409
Psmb3	0.0126404	0.0448909	0.181	0.133	1	ENSMUSG00000069744
Rbfox2	0.012646	0.0329534	0.229	0.169	1	ENSMUSG00000033565
Adgrf5	0.0126643	-0.0843644	0.795	0.776	1	ENSMUSG00000056492
53934	0.0126755	0.0320532	0.029	0.012	1	NA
Patz1	0.0127088	-0.0764338	0.029	0.054	1	ENSMUSG00000020453
Ankrd10	0.0127363	0.0408138	0.099	0.064	1	ENSMUSG00000031508
Itpr1	0.0127646	0.0838017	0.17	0.126	1	ENSMUSG00000030102
Zfp692	0.0127767	0.0230121	0.028	0.011	1	ENSMUSG00000037243
Gm13339	0.0128089	0.0285911	0.028	0.011	1	ENSMUSG00000082884
Rtca	0.0128221	0.0389077	0.115	0.077	1	ENSMUSG00000000339
Lman2l	0.0128233	0.0397192	0.03	0.013	1	ENSMUSG00000001143
Zc3hav1	0.0128862	0.0567212	0.154	0.109	1	ENSMUSG00000029826
Rnf123	0.0128994	0.0339838	0.051	0.027	1	ENSMUSG00000041528
AC151846.1	0.0129082	-0.0511264	0.022	0.045	1	ENSMUSG00000111897
Timm23	0.0129615	0.0459751	0.231	0.173	1	ENSMUSG00000013701
Ucma	0.0130116	0.0332672	0.017	0.005	1	ENSMUSG00000026668
Sprtn	0.0130149	0.0285069	0.058	0.032	1	ENSMUSG00000031986
Rps13-ps2	0.0130296	-0.0957157	0.356	0.413	1	ENSMUSG00000069972
Smpd2	0.0130652	0.0472012	0.045	0.023	1	ENSMUSG00000019822
Hsd17b10	0.0130854	0.0256942	0.08	0.05	1	ENSMUSG00000025260
Top1mt	0.0131199	0.019311	0.017	0.005	1	ENSMUSG00000000934
Pycard	0.0131381	0.0424625	0.048	0.025	1	ENSMUSG00000030793
B930095G15Rik	0.0131417	0.0163441	0.017	0.005	1	ENSMUSG00000085133
BTF3L4	0.0131653	0.02898	0.142	0.1	1	ENSMUSG00000114133
Zfp740	0.01317	0.0174669	0.118	0.078	1	ENSMUSG00000046897
Nexn	0.0131847	-0.0664056	0.045	0.074	1	ENSMUSG00000039103
Gm8420	0.0131853	0.0123133	0.017	0.005	1	ENSMUSG00000072324
Rrp36	0.0132579	0.0437038	0.048	0.025	1	ENSMUSG00000023971
Gle1	0.0132768	0.0403386	0.094	0.061	1	ENSMUSG00000019715
Gm8210	0.0132793	-0.0177329	0.023	0.047	1	ENSMUSG00000094497
S100a10	0.0132849	0.0822643	0.373	0.303	1	ENSMUSG00000041959
Bglap	0.0132887	0.0421015	0.164	0.117	1	ENSMUSG00000074483
Vmn2r124	0.0132951	0.0339396	0.035	0.016	1	ENSMUSG00000094396
Adprh	0.0133015	0.0454649	0.16	0.114	1	ENSMUSG00000002844
Ptch2	0.0133495	0.0128374	0.028	0.011	1	ENSMUSG00000028681
Zfp334	0.0133507	0.0462939	0.032	0.014	1	ENSMUSG00000017667
Tor1a	0.0133639	-0.0622588	0.046	0.076	1	ENSMUSG00000026849
Caap1	0.0133655	0.0160126	0.057	0.031	1	ENSMUSG00000028578
Dyrk1b	0.0134274	0.0166853	0.017	0.005	1	ENSMUSG00000002409
Rtfdc1	0.0135091	0.0560005	0.141	0.099	1	ENSMUSG00000027502
Iffo2	0.0135258	0.013625	0.103	0.067	1	ENSMUSG00000041025
Drosha	0.0135416	0.0447328	0.068	0.04	1	ENSMUSG00000022191
Afg3l1	0.0135417	0.0457208	0.067	0.039	1	ENSMUSG00000031967
Abca3	0.0135465	0.0205231	0.1	0.065	1	ENSMUSG00000024130
Dram2	0.0135515	0.0555216	0.27	0.21	1	ENSMUSG00000027900
Srsf3	0.0135583	-0.11297	0.328	0.367	1	ENSMUSG00000071172
Gm15427	0.0135791	-0.074113	0.12	0.163	1	ENSMUSG00000081051
Gm10132	0.0136193	-0.0909197	0.26	0.311	1	ENSMUSG00000063556
Gpr180	0.013622	0.0312276	0.054	0.029	1	ENSMUSG00000022131
Tmem120a	0.0136333	0.0279922	0.051	0.027	1	ENSMUSG00000039886
Ctxn1	0.0136509	0.000578939	0.017	0.005	1	ENSMUSG00000048644
Dlg4	0.0136559	0.0476021	0.033	0.015	1	ENSMUSG00000020886
Glg1	0.0136791	0.0836392	0.373	0.3	1	ENSMUSG00000003316
Rnf215	0.0136835	0.0215455	0.139	0.097	1	ENSMUSG00000003581
Elob	0.0137048	-0.129443	0.541	0.539	1	ENSMUSG00000055839
AC168058.1	0.0137524	0.0359521	0.107	0.073	1	ENSMUSG00000112342
Psen1	0.0137542	0.0419729	0.167	0.119	1	ENSMUSG00000019969
Rab43	0.0137576	0.0321251	0.039	0.019	1	ENSMUSG00000030055
Rps3a1	0.0137596	-0.0487547	0.819	0.823	1	ENSMUSG00000028081
Cygb	0.0137849	0.0379445	0.054	0.029	1	ENSMUSG00000020810
Uty	0.0138293	-0.0560415	0.032	0.058	1	ENSMUSG00000068457
Natd1	0.0138312	0.038709	0.032	0.014	1	ENSMUSG00000018931
Rrm2b	0.0138419	-0.0704319	0.046	0.076	1	ENSMUSG00000022292
Tmc6	0.0138499	0.0294478	0.049	0.026	1	ENSMUSG00000025572
Mir703	0.0138739	0.0310714	0.051	0.027	1	ENSMUSG00000105814
Surf1	0.0138751	0.0429061	0.086	0.054	1	ENSMUSG00000015790
Ptprd	0.0139004	0.0457505	0.033	0.015	1	ENSMUSG00000028399
Kctd12b	0.0139005	0.0658519	0.36	0.283	1	ENSMUSG00000041633
Gm8394	0.0139051	-0.015013	0.001	0.012	1	ENSMUSG00000050490
Pdha1	0.0139185	0.0675463	0.174	0.128	1	ENSMUSG00000031299
Metrn	0.0139228	0.0163157	0.03	0.013	1	ENSMUSG00000002274
Gm9200	0.0139312	-0.0197656	0.001	0.012	1	ENSMUSG00000083595
Exosc1	0.0139375	-0.105322	0.071	0.103	1	ENSMUSG00000034321
Pbld1	0.0139391	-0.0524287	0.052	0.083	1	ENSMUSG00000112129
Gm12543	0.0139589	0.029948	0.042	0.021	1	ENSMUSG00000080772
Zfp52	0.0139719	0.0276701	0.048	0.025	1	ENSMUSG00000051341
Gm25313	0.0139918	-0.0361361	0.006	0.02	1	ENSMUSG00000095738
Sulf2	0.0140183	0.0490415	0.099	0.065	1	ENSMUSG00000006800
Gm8991	0.0140208	-0.0130561	0.01	0.027	1	ENSMUSG00000059179
Atf5	0.0140292	0.0337325	0.045	0.023	1	ENSMUSG00000038539
Hoxa3	0.0140371	0.061044	0.061	0.035	1	ENSMUSG00000079560
Tomm40l	0.014053	0.0577746	0.1	0.067	1	ENSMUSG00000005674
Creb3l2	0.0140721	0.0643614	0.181	0.133	1	ENSMUSG00000038648
Zc4h2	0.0140721	0.0450959	0.036	0.017	1	ENSMUSG00000035062
Rpap1	0.0140807	0.0373873	0.039	0.019	1	ENSMUSG00000034032
Decr1	0.014086	0.0327118	0.068	0.04	1	ENSMUSG00000028223
Nav2	0.0140953	0.0351557	0.035	0.016	1	ENSMUSG00000052512
Chchd1	0.0141022	0.0300402	0.128	0.088	1	ENSMUSG00000063787
Gm22710	0.0141686	-0.015098	0.001	0.012	1	ENSMUSG00000080542
Rbbp6	0.0141687	0.0623537	0.318	0.25	1	ENSMUSG00000030779
Zfp691	0.0141827	0.0316172	0.038	0.018	1	ENSMUSG00000045268
Rap2a	0.0141945	0.024118	0.183	0.133	1	ENSMUSG00000051615
Ppp1cc	0.0142315	0.0515319	0.367	0.302	1	ENSMUSG00000004455
Med30	0.0142516	0.0364116	0.067	0.039	1	ENSMUSG00000038622
Cdk7	0.0142872	0.0602112	0.074	0.046	1	ENSMUSG00000069089
Polr1d	0.0142886	0.0493304	0.386	0.305	1	ENSMUSG00000029642
Isg15	0.0143635	0.0373863	0.102	0.067	1	ENSMUSG00000035692
Casq1	0.0143868	0.029537	0.035	0.016	1	ENSMUSG00000007122
Gm1821	0.0143886	-0.153525	0.486	0.514	1	ENSMUSG00000044285
Naxe	0.014389	0.0472261	0.132	0.092	1	ENSMUSG00000028070
Mindy2	0.0144125	0.0150843	0.163	0.115	1	ENSMUSG00000042444
AW146154	0.0144254	0.0243647	0.042	0.021	1	ENSMUSG00000074166
Akr1b10	0.0144665	0.0352982	0.067	0.039	1	ENSMUSG00000061758
Slc29a1	0.0144731	0.0922049	0.63	0.551	1	ENSMUSG00000023942
Nhs	0.0144956	0.0290193	0.035	0.016	1	ENSMUSG00000059493
Xylt1	0.014541	0.0308471	0.049	0.026	1	ENSMUSG00000030657
Glo1	0.01455	0.0506816	0.113	0.077	1	ENSMUSG00000024026
Gja4	0.0145749	-0.123272	0.208	0.253	1	ENSMUSG00000050234
1110038B12Rik	0.0145775	0.0194418	0.113	0.076	1	ENSMUSG00000092203
Nr3c1	0.0145862	-0.149734	0.286	0.318	1	ENSMUSG00000024431
Atp8b1	0.014596	-0.143547	0.173	0.211	1	ENSMUSG00000039529
Ggta1	0.0146025	-0.159558	0.306	0.334	1	ENSMUSG00000035778
Emc1	0.0146345	0.0269717	0.144	0.1	1	ENSMUSG00000078517
Emc10	0.0146502	0.0493509	0.255	0.193	1	ENSMUSG00000008140
Flt3l	0.0146698	0.0305207	0.045	0.023	1	ENSMUSG00000110206
Rcsd1	0.0146958	0.00958212	0.12	0.081	1	ENSMUSG00000040723
Srek1ip1	0.0147009	0.0382706	0.1	0.066	1	ENSMUSG00000021716
Hs1bp3	0.0147129	0.0291466	0.041	0.02	1	ENSMUSG00000020605
Abca7	0.0147204	0.0333149	0.042	0.021	1	ENSMUSG00000035722
Mpdu1	0.0147275	0.0522857	0.1	0.066	1	ENSMUSG00000018761
Adal	0.0147428	-0.0624838	0.02	0.041	1	ENSMUSG00000027259
Prdm4	0.0147533	0.0259898	0.036	0.017	1	ENSMUSG00000035529
Fzd7	0.0147681	0.023793	0.019	0.006	1	ENSMUSG00000041075
Foxs1	0.0147909	0.0234521	0.019	0.006	1	ENSMUSG00000074676
Myct1	0.014817	-0.127984	0.504	0.515	1	ENSMUSG00000046916
AC155921.1	0.0148211	-0.00752691	0.041	0.069	1	ENSMUSG00000111485
Zc3h6	0.0148288	0.0217858	0.041	0.02	1	ENSMUSG00000042851
Col6a3	0.0148354	0.0592846	0.161	0.118	1	ENSMUSG00000048126
Tpm3-rs7	0.0148496	-0.129444	0.17	0.213	1	ENSMUSG00000058126
Itih5	0.0148524	0.0501181	0.1	0.066	1	ENSMUSG00000025780
Smc2	0.0148938	0.0250178	0.091	0.059	1	ENSMUSG00000028312
Cs	0.0148984	0.0399707	0.232	0.175	1	ENSMUSG00000005683
Col3a1	0.0148987	0.0319014	0.038	0.018	1	ENSMUSG00000026043
Pip5k1a	0.0149102	0.0466692	0.161	0.116	1	ENSMUSG00000028126
Coq4	0.0149253	0.0231722	0.039	0.019	1	ENSMUSG00000026798
Bik	0.0149452	0.0684417	0.147	0.106	1	ENSMUSG00000016758
Rpl14	0.0149735	-0.110753	0.612	0.608	1	ENSMUSG00000025794
Fars2	0.0150212	0.0213684	0.019	0.006	1	ENSMUSG00000021420
Hsph1	0.0150292	-0.089338	0.03	0.055	1	ENSMUSG00000029657
Ctgf	0.0150609	0.0958271	0.203	0.156	1	ENSMUSG00000019997
Tep1	0.0150677	0.0226036	0.019	0.006	1	ENSMUSG00000006281
Selenok	0.0150897	0.0601176	0.356	0.285	1	ENSMUSG00000042682
Tada1	0.0150952	0.0490884	0.075	0.047	1	ENSMUSG00000026563
Dimt1	0.0151125	-0.0720342	0.03	0.055	1	ENSMUSG00000021692
9130221H12Rik	0.0151142	0.0282249	0.019	0.006	1	ENSMUSG00000090330
Atp9b	0.0151325	0.0359114	0.125	0.086	1	ENSMUSG00000024566
Uhrf1bp1	0.0151375	0.0204705	0.019	0.006	1	ENSMUSG00000039512
Gm12712	0.0151382	-0.0089762	0.012	0.029	1	ENSMUSG00000081675
Nsfl1c	0.0152265	0.0672757	0.293	0.233	1	ENSMUSG00000027455
Yes1	0.0152343	-0.112112	0.123	0.161	1	ENSMUSG00000014932
2610203C22Rik	0.0152547	0.0277368	0.019	0.006	1	ENSMUSG00000079671
Maml3	0.0152769	0.0320683	0.116	0.079	1	ENSMUSG00000061143
Cebpzos	0.0154084	0.0499926	0.103	0.069	1	ENSMUSG00000062691
Gm14567	0.0154712	0.0194006	0.087	0.056	1	ENSMUSG00000080896
Hivep1	0.0154739	0.0667784	0.094	0.063	1	ENSMUSG00000021366
1110059E24Rik	0.0154876	0.0464421	0.128	0.089	1	ENSMUSG00000035171
Plcb3	0.015525	0.0310282	0.08	0.05	1	ENSMUSG00000024960
Smad7	0.015561	-0.112166	0.138	0.177	1	ENSMUSG00000025880
Agtrap	0.0155908	0.0386936	0.183	0.134	1	ENSMUSG00000029007
Scgb3a1	0.0156571	-0.054778	0.019	0.039	1	ENSMUSG00000064057
4833439L19Rik	0.015659	0.0374085	0.155	0.111	1	ENSMUSG00000025871
B3glct	0.0157001	0.00365548	0.052	0.028	1	ENSMUSG00000051950
Slc35a5	0.0157193	0.0384791	0.077	0.048	1	ENSMUSG00000022664
Btbd2	0.0157202	0.0186436	0.104	0.069	1	ENSMUSG00000003344
Cyb561d1	0.0157231	0.0235898	0.036	0.017	1	ENSMUSG00000048796
Zfp865	0.015769	0.0365075	0.06	0.034	1	ENSMUSG00000074405
Sbf2	0.015787	0.0365213	0.132	0.092	1	ENSMUSG00000038371
Tmem160	0.0157912	0.0571804	0.11	0.075	1	ENSMUSG00000019158
Olfml2b	0.0157951	0.0147408	0.045	0.023	1	ENSMUSG00000038463
2610507B11Rik	0.0158105	0.029292	0.315	0.245	1	ENSMUSG00000010277
Cr1l	0.0158211	-0.119502	0.437	0.455	1	ENSMUSG00000016481
Clk3	0.0158617	0.0411535	0.071	0.044	1	ENSMUSG00000032316
Ccng2	0.0158793	0.0379998	0.113	0.077	1	ENSMUSG00000029385
Pced1b	0.015905	0.0192766	0.078	0.049	1	ENSMUSG00000044250
Cycs	0.0159367	0.0288784	0.292	0.23	1	ENSMUSG00000063694
Bax	0.0159703	0.0772218	0.311	0.249	1	ENSMUSG00000003873
Rsl24d1	0.0161174	-0.0930808	0.075	0.108	1	ENSMUSG00000032215
Jmjd7	0.0161831	0.0141607	0.009	0.001	1	ENSMUSG00000098789
Mgst2	0.0161831	0.0131884	0.009	0.001	1	ENSMUSG00000074604
Gramd2	0.0161831	0.0200203	0.009	0.001	1	ENSMUSG00000074259
Tdg	0.0162107	0.00209801	0.109	0.072	1	ENSMUSG00000034674
Gm12936	0.0162238	0.0112635	0.009	0.001	1	ENSMUSG00000081319
Bet1l	0.0162302	0.0360617	0.113	0.077	1	ENSMUSG00000025484
Epb41l4a	0.0162331	-0.104157	0.054	0.083	1	ENSMUSG00000024376
Gm13166	0.0162646	0.00949197	0.009	0.001	1	ENSMUSG00000085525
Gm43684	0.0162693	0.022927	0.013	0.003	1	ENSMUSG00000105613
Rpl37a	0.0162856	-0.0606298	0.84	0.824	1	ENSMUSG00000046330
Dctd	0.0163054	0.00883052	0.009	0.001	1	ENSMUSG00000031562
Slc13a5	0.0163054	0.019037	0.009	0.001	1	ENSMUSG00000020805
Ppp4r4	0.0163054	0.0173028	0.009	0.001	1	ENSMUSG00000021209
Plcl2	0.0163054	0.0110617	0.009	0.001	1	ENSMUSG00000038910
Gm3608	0.0163613	0.0263564	0.273	0.212	1	ENSMUSG00000067017
Ahcyl1	0.0163839	0.0530831	0.165	0.121	1	ENSMUSG00000027893
Cul1	0.0163987	-0.138919	0.167	0.202	1	ENSMUSG00000029686
Nav3	0.0164232	0.0210495	0.09	0.058	1	ENSMUSG00000020181
Pold2	0.0164245	0.0315173	0.058	0.033	1	ENSMUSG00000020471
Snhg12	0.0164323	0.0344475	0.097	0.064	1	ENSMUSG00000086290
Il10rb	0.0164437	0.0406426	0.239	0.183	1	ENSMUSG00000022969
St6galnac2	0.016494	-0.0581449	0.039	0.066	1	ENSMUSG00000057286
Ranbp6	0.0165464	-0.0460566	0.017	0.037	1	ENSMUSG00000074909
Pid1	0.0165525	0.0169049	0.006	0	1	ENSMUSG00000045658
9430034N14Rik	0.0165525	0.0138383	0.006	0	1	ENSMUSG00000102964
Gm23805	0.0165525	0.0017507	0.006	0	1	ENSMUSG00000094820
Olfr1198	0.0165525	0.00479902	0.006	0	1	ENSMUSG00000075117
Gm14251	0.0165525	0.00722535	0.006	0	1	ENSMUSG00000081751
Olfr71	0.0165525	0.00738749	0.006	0	1	ENSMUSG00000046450
Gm43268	0.0165525	0.0134958	0.006	0	1	ENSMUSG00000107182
Gm30270	0.0165525	0.0120509	0.006	0	1	ENSMUSG00000106709
Gm22418	0.0165525	0.0017507	0.006	0	1	ENSMUSG00000094963
Gm31024	0.0165525	0.00706363	0.006	0	1	ENSMUSG00000109015
Gm10603	0.0165525	0.0128841	0.006	0	1	ENSMUSG00000099137
Gm16486	0.0165525	0.00762456	0.006	0	1	ENSMUSG00000110622
Irx3os	0.0165525	0.0127268	0.006	0	1	ENSMUSG00000046413
4930513N10Rik	0.0165525	0.00669885	0.006	0	1	ENSMUSG00000074136
Mpzl3	0.0165525	0.00909662	0.006	0	1	ENSMUSG00000070305
Gm36936	0.0165525	0.0170387	0.006	0	1	ENSMUSG00000102411
Slc35f1	0.0165525	0.0141253	0.006	0	1	ENSMUSG00000038602
Stac3	0.0165525	0.019163	0.006	0	1	ENSMUSG00000040287
Prox2	0.0165525	0.00942773	0.006	0	1	ENSMUSG00000042320
51919	0.0165525	0.00399813	0.006	0	1	NA
Tnf	0.0165525	0.0195489	0.006	0	1	ENSMUSG00000024401
Capn6	0.0165525	0.0109543	0.006	0	1	ENSMUSG00000067276
Gm16418	0.0165525	0.00631148	0.006	0	1	ENSMUSG00000084093
Gm826	0.0165525	0.00407005	0.006	0	1	ENSMUSG00000074623
Gm4525	0.0165525	0.0120742	0.006	0	1	ENSMUSG00000106105
E330017L17Rik	0.0165525	0.00900105	0.006	0	1	ENSMUSG00000086369
Pde4c	0.0165525	0.00801525	0.006	0	1	ENSMUSG00000031842
Gm37805	0.0165525	0.00818297	0.006	0	1	ENSMUSG00000103755
AC153821.3	0.0165525	0.0117851	0.006	0	1	ENSMUSG00000112544
Gm15666	0.0165525	0.0137346	0.006	0	1	ENSMUSG00000084399
Plekhs1	0.0165525	0.00930273	0.006	0	1	ENSMUSG00000035818
Sik1	0.016556	0.0573582	0.154	0.111	1	ENSMUSG00000024042
Pacs2	0.0166025	0.0169696	0.065	0.038	1	ENSMUSG00000021143
Fst	0.0166126	0.0307292	0.02	0.007	1	ENSMUSG00000021765
Gm13443	0.0166479	0.0094121	0.013	0.003	1	ENSMUSG00000075391
Marveld2	0.0166479	0.0232911	0.013	0.003	1	ENSMUSG00000021636
Psmd2	0.0166685	0.0432316	0.206	0.153	1	ENSMUSG00000006998
Usp5	0.0166738	0.0394473	0.119	0.082	1	ENSMUSG00000038429
Arl15	0.0166838	-0.137085	0.171	0.21	1	ENSMUSG00000042348
Rpl39	0.0167053	-0.0402849	0.862	0.835	1	ENSMUSG00000079641
Uqcrc1	0.0167932	0.0521253	0.208	0.155	1	ENSMUSG00000025651
Fmnl3	0.0168267	0.0285365	0.255	0.193	1	ENSMUSG00000023008
Anks6	0.0168401	0.015245	0.013	0.003	1	ENSMUSG00000066191
Acvr2b	0.0169041	0.02333	0.02	0.007	1	ENSMUSG00000061393
Ifit2	0.0169227	0.0431678	0.055	0.031	1	ENSMUSG00000045932
Slc31a1	0.016938	0.0466051	0.189	0.141	1	ENSMUSG00000066150
Sh3rf1	0.0169468	0.0603671	0.096	0.064	1	ENSMUSG00000031642
54375	0.0169647	0.0710591	0.113	0.079	1	NA
Mrps5	0.0169912	0.0283716	0.112	0.076	1	ENSMUSG00000027374
Ndufa13	0.0169932	0.0339906	0.19	0.141	1	ENSMUSG00000036199
Gm5850	0.0170109	-0.0358338	0.049	0.078	1	ENSMUSG00000103286
Gm5851	0.0170109	-0.0358338	0.049	0.078	1	ENSMUSG00000104028
Amigo1	0.0170367	-0.0441192	0.009	0.024	1	ENSMUSG00000050947
Dok3	0.017101	0.0101007	0.02	0.007	1	ENSMUSG00000035711
Rpl18-ps2	0.0171276	0.0398195	0.453	0.365	1	ENSMUSG00000053173
Golm1	0.0171395	0.0297849	0.212	0.159	1	ENSMUSG00000021556
Btf3l4	0.0171502	0.0146895	0.173	0.127	1	ENSMUSG00000028568
Xxylt1	0.0171633	0.0399217	0.103	0.069	1	ENSMUSG00000047434
Bcl7c	0.0171712	0.0259858	0.055	0.031	1	ENSMUSG00000030814
Lurap1l	0.0171753	0.0288019	0.083	0.053	1	ENSMUSG00000048706
Icmt	0.0172528	0.0428895	0.094	0.062	1	ENSMUSG00000039662
Rara	0.017273	0.0198974	0.099	0.065	1	ENSMUSG00000037992
Gt(ROSA)26Sor	0.0174265	0.0307595	0.06	0.034	1	ENSMUSG00000086429
Ptbp3	0.0174447	-0.123246	0.491	0.498	1	ENSMUSG00000028382
Srp19	0.0175699	0.0535118	0.311	0.244	1	ENSMUSG00000014504
Cyth2	0.0176025	0.0260136	0.094	0.062	1	ENSMUSG00000003269
Ddx17	0.0176207	-0.0982182	0.547	0.544	1	ENSMUSG00000055065
Pum1	0.0176207	0.0583306	0.324	0.256	1	ENSMUSG00000028580
Ttc39b	0.0176426	0.0484076	0.126	0.089	1	ENSMUSG00000038172
Bub3	0.017659	0.0473026	0.231	0.175	1	ENSMUSG00000066979
Lrrc8d	0.0176841	0.0454516	0.086	0.056	1	ENSMUSG00000046079
Uhrf1bp1l	0.0176929	0.0324508	0.052	0.029	1	ENSMUSG00000019951
Eif3c	0.017755	0.0696361	0.412	0.338	1	ENSMUSG00000030738
Taf6l	0.0177554	0.0212128	0.022	0.008	1	ENSMUSG00000003680
Ube2h	0.0177612	0.0604152	0.257	0.199	1	ENSMUSG00000039159
Il6st	0.0177634	-0.112351	0.569	0.592	1	ENSMUSG00000021756
Ssh1	0.0177687	0.042321	0.125	0.087	1	ENSMUSG00000042121
Ccdc77	0.0177711	0.0430402	0.049	0.027	1	ENSMUSG00000030177
Tmem123	0.0178887	-0.127186	0.329	0.36	1	ENSMUSG00000050912
Ddit4	0.0179361	0.0575544	0.39	0.306	1	ENSMUSG00000020108
Rxrb	0.0179361	0.0100524	0.08	0.05	1	ENSMUSG00000039656
Anapc15	0.0179468	-0.0662932	0.022	0.043	1	ENSMUSG00000030649
Gata3	0.0179577	-0.0177775	0	0.008	1	ENSMUSG00000015619
Itga4	0.0179577	-0.018314	0	0.008	1	ENSMUSG00000027009
Lmod3	0.0179577	-0.0221969	0	0.008	1	ENSMUSG00000044086
Amt	0.0179577	-0.0150266	0	0.008	1	ENSMUSG00000032607
Kcnc2	0.0179577	-0.0175195	0	0.008	1	ENSMUSG00000035681
Ccl3	0.0179577	-0.0243305	0	0.008	1	ENSMUSG00000000982
Treml1	0.0179577	-0.0156946	0	0.008	1	ENSMUSG00000023993
Mpc2	0.01799	0.0361758	0.212	0.159	1	ENSMUSG00000026568
Acyp1	0.0180377	0.0277975	0.058	0.033	1	ENSMUSG00000008822
Chp1	0.0180397	0.0498914	0.213	0.16	1	ENSMUSG00000014077
Gm11427	0.0180508	0.0259949	0.022	0.008	1	ENSMUSG00000083161
Fkbp3	0.0180808	0.0536749	0.264	0.205	1	ENSMUSG00000020949
Gar1	0.0180981	0.034711	0.112	0.077	1	ENSMUSG00000028010
Ptn	0.0181005	0.0325932	0.022	0.008	1	ENSMUSG00000029838
1700025G04Rik	0.0182302	-0.11042	0.196	0.239	1	ENSMUSG00000032666
Gm43247	0.0182906	0.02566	0.11	0.076	1	ENSMUSG00000105406
St3gal4	0.0183218	0.0175327	0.139	0.097	1	ENSMUSG00000032038
Ano8	0.0183237	0.0315417	0.057	0.032	1	ENSMUSG00000034863
Il1r1	0.0183814	-0.0909153	0.068	0.099	1	ENSMUSG00000026072
Gm12481	0.0184246	-0.0477875	0.042	0.07	1	ENSMUSG00000043770
Fam217a	0.0184703	0.0292596	0.023	0.009	1	ENSMUSG00000021414
Sec61a1	0.0185073	0.0570506	0.168	0.126	1	ENSMUSG00000030082
Necap2	0.0185429	0.0311481	0.241	0.183	1	ENSMUSG00000028923
Tcf3	0.0185452	0.0769404	0.202	0.155	1	ENSMUSG00000020167
Eif2s3x	0.0185543	0.0301287	0.147	0.104	1	ENSMUSG00000035150
Dst	0.0185601	0.0619634	0.277	0.219	1	ENSMUSG00000026131
Gngt2	0.0185705	0.0531197	0.299	0.235	1	ENSMUSG00000038811
Prnp	0.0185909	0.030145	0.244	0.187	1	ENSMUSG00000079037
Zfas1	0.0186105	0.0325335	0.269	0.209	1	ENSMUSG00000074578
Epb41l2	0.018636	0.0158955	0.174	0.127	1	ENSMUSG00000019978
Zdhhc14	0.0186546	0.0170742	0.022	0.008	1	ENSMUSG00000034265
AC153522.1	0.0186655	0.0180012	0.023	0.009	1	ENSMUSG00000112013
Pfdn2	0.0186789	0.0450693	0.148	0.107	1	ENSMUSG00000006412
Acox3	0.0186981	0.0270114	0.081	0.052	1	ENSMUSG00000029098
Unc93b1	0.0188213	0.0664246	0.152	0.112	1	ENSMUSG00000036908
Magi3	0.0188305	0.0438155	0.157	0.114	1	ENSMUSG00000052539
Fbf1	0.0188352	0.0421805	0.045	0.024	1	ENSMUSG00000020776
Abhd4	0.0189272	0.0285396	0.286	0.224	1	ENSMUSG00000040997
Sord	0.0189756	0.0642322	0.094	0.064	1	ENSMUSG00000027227
Becn1	0.018992	0.0444911	0.163	0.118	1	ENSMUSG00000035086
Fhl3	0.0190289	0.0276699	0.081	0.052	1	ENSMUSG00000032643
Cdk14	0.0190488	-0.0641163	0.02	0.04	1	ENSMUSG00000028926
Dctn3	0.0190684	0.0647538	0.123	0.087	1	ENSMUSG00000028447
Zswim1	0.0191361	0.0182671	0.023	0.009	1	ENSMUSG00000017764
Clec11a	0.0191361	0.0242984	0.023	0.009	1	ENSMUSG00000004473
Srgn	0.0191492	-0.0620245	0.775	0.758	1	ENSMUSG00000020077
Rras	0.0191892	0.0395569	0.433	0.341	1	ENSMUSG00000038387
Oat	0.0192407	0.0498694	0.135	0.096	1	ENSMUSG00000030934
Gadd45gip1	0.0192435	0.0117758	0.058	0.033	1	ENSMUSG00000033751
Itga3	0.0192462	0.0587056	0.158	0.116	1	ENSMUSG00000001507
Rcc2	0.0193233	0.0607384	0.136	0.097	1	ENSMUSG00000040945
Dnajc7	0.0193622	0.0431115	0.255	0.196	1	ENSMUSG00000014195
Cdk16	0.0193837	0.0303819	0.129	0.09	1	ENSMUSG00000031065
Cdkn2c	0.019388	0.031876	0.023	0.009	1	ENSMUSG00000028551
Gm5578	0.019427	-0.0174594	0.003	0.014	1	ENSMUSG00000029633
Gm14421	0.0194737	-0.0137957	0.006	0.019	1	ENSMUSG00000083111
Sirt5	0.0195033	0.0534397	0.094	0.064	1	ENSMUSG00000054021
Gm44913	0.0195858	-0.0199501	0.003	0.014	1	ENSMUSG00000109051
Ednrb	0.0195863	-0.152223	0.186	0.222	1	ENSMUSG00000022122
Gm4986	0.0195916	0.0177038	0.023	0.009	1	ENSMUSG00000080996
Adam9	0.0196444	0.0659837	0.295	0.232	1	ENSMUSG00000031555
Ttc37	0.0196695	0.0409002	0.046	0.025	1	ENSMUSG00000033991
Tmem255a	0.0197198	0.0212543	0.023	0.009	1	ENSMUSG00000036502
Glb1	0.0197254	0.0209535	0.054	0.03	1	ENSMUSG00000045594
Zfp966	0.0197271	-0.0198184	0.017	0.036	1	ENSMUSG00000089756
Tspan14	0.0197475	0.0577101	0.56	0.462	1	ENSMUSG00000037824
Pde4a	0.0198057	0.0488436	0.039	0.02	1	ENSMUSG00000032177
Lpp	0.0198192	0.0343361	0.373	0.293	1	ENSMUSG00000033306
Snai1	0.0198241	0.015116	0.136	0.096	1	ENSMUSG00000042821
Mier1	0.0198511	-0.128479	0.213	0.249	1	ENSMUSG00000028522
Ssbp1	0.0198798	0.0481942	0.174	0.128	1	ENSMUSG00000029911
Mtmr3	0.0198846	0.0591524	0.151	0.11	1	ENSMUSG00000034354
Sec23a	0.0199246	0.0270647	0.083	0.053	1	ENSMUSG00000020986
Bivm	0.0199554	0.0404175	0.045	0.024	1	ENSMUSG00000041684
Fdft1	0.0200112	0.0378076	0.044	0.023	1	ENSMUSG00000021273
Ptrhd1	0.020021	0.0284601	0.065	0.039	1	ENSMUSG00000096199
Plod2	0.020024	0.0261688	0.068	0.041	1	ENSMUSG00000032374
Pcdhb7	0.0200617	0.0385001	0.045	0.024	1	ENSMUSG00000045062
Ube2z	0.0201135	0.0240789	0.144	0.101	1	ENSMUSG00000014349
Foxk1	0.0201375	0.0380451	0.046	0.025	1	ENSMUSG00000056493
Cbx6	0.0201506	0.0605172	0.302	0.24	1	ENSMUSG00000089715
Ssr3	0.0201549	0.0661134	0.55	0.464	1	ENSMUSG00000027828
Wdfy1	0.0202052	0.0469358	0.074	0.047	1	ENSMUSG00000073643
Znrf1	0.0202918	0.059507	0.292	0.228	1	ENSMUSG00000033545
Prg4	0.0203104	-0.0407403	0.006	0.019	1	ENSMUSG00000006014
Rala	0.0203118	0.0672608	0.286	0.228	1	ENSMUSG00000008859
Rnf144b	0.0203155	0.0274849	0.19	0.143	1	ENSMUSG00000038068
Rab21	0.0203262	0.0329385	0.158	0.116	1	ENSMUSG00000020132
AW554918	0.0203689	0.0281512	0.025	0.01	1	ENSMUSG00000033632
Plin2	0.0203717	0.0361989	0.164	0.119	1	ENSMUSG00000028494
Akna	0.0203944	0.0301115	0.025	0.01	1	ENSMUSG00000039158
Zdhhc6	0.0203948	0.0488234	0.138	0.098	1	ENSMUSG00000024982
Ik	0.0204193	-0.131516	0.38	0.401	1	ENSMUSG00000024474
1500011B03Rik	0.0205031	0.0364672	0.093	0.062	1	ENSMUSG00000072694
AC153522.2	0.0205414	0.0237982	0.015	0.004	1	ENSMUSG00000112516
Dgke	0.0205451	0.043424	0.084	0.055	1	ENSMUSG00000000276
Per2	0.0205478	0.0188062	0.025	0.01	1	ENSMUSG00000055866
Tmem106c	0.0205601	0.0332217	0.064	0.038	1	ENSMUSG00000052369
Tmem80	0.0205669	0.0390919	0.062	0.037	1	ENSMUSG00000025505
Paqr9	0.0206096	-0.0199886	0.001	0.011	1	ENSMUSG00000064225
Rpa1	0.0206134	0.0346017	0.061	0.036	1	ENSMUSG00000000751
Tex261	0.0206164	0.0433697	0.295	0.232	1	ENSMUSG00000014748
Rnu3a	0.0206165	-0.0256689	0.015	0.032	1	ENSMUSG00000065870
Rnu3a.1	0.0206165	-0.0256689	0.015	0.032	1	NA
Gm7866	0.0206213	-0.0897285	0.274	0.316	1	ENSMUSG00000061390
Gm11837	0.020624	-0.0366613	0.022	0.043	1	ENSMUSG00000086587
Galns	0.0206921	0.033107	0.028	0.012	1	ENSMUSG00000015027
Eid2	0.0207135	0.0263949	0.068	0.041	1	ENSMUSG00000046058
54087	0.0207194	0.0232514	0.015	0.004	1	NA
Gm37404	0.0207404	0.0320839	0.028	0.012	1	ENSMUSG00000103322
Uaca	0.0207481	-0.139752	0.367	0.39	1	ENSMUSG00000034485
Gabpb1	0.020762	0.0392684	0.194	0.146	1	ENSMUSG00000027361
Tcirg1	0.0207747	0.0382434	0.094	0.063	1	ENSMUSG00000001750
Ctse	0.0208413	-0.0260341	0.001	0.011	1	ENSMUSG00000004552
C730034F03Rik	0.0208629	0.00911907	0.015	0.004	1	ENSMUSG00000079242
1810013L24Rik	0.0208796	0.0365273	0.158	0.115	1	ENSMUSG00000022507
CT573016.1	0.0208801	-0.0112087	0.001	0.011	1	ENSMUSG00000114923
Abl1	0.0209246	0.0493288	0.164	0.12	1	ENSMUSG00000026842
Fam172a	0.0209262	0.0360771	0.11	0.076	1	ENSMUSG00000064138
Ttc12	0.0209349	0.00774312	0.015	0.004	1	ENSMUSG00000040219
Ncald	0.0209349	0.0115882	0.015	0.004	1	ENSMUSG00000051359
Tnfrsf19	0.020971	0.0170522	0.015	0.004	1	ENSMUSG00000060548
Polr1c	0.0209743	0.0498236	0.131	0.093	1	ENSMUSG00000067148
Gm42814	0.0209824	0.0119461	0.089	0.059	1	ENSMUSG00000106568
Rasa3	0.0210031	0.0411489	0.073	0.046	1	ENSMUSG00000031453
Prpf4	0.0210135	0.0191566	0.1	0.067	1	ENSMUSG00000066148
Srgap2	0.0210279	0.0733885	0.203	0.156	1	ENSMUSG00000026425
Hdhd2	0.0210316	0.0175686	0.077	0.049	1	ENSMUSG00000025421
Nup153	0.0210329	-0.0834457	0.055	0.083	1	ENSMUSG00000021374
Kif21b	0.0210395	0.0200512	0.026	0.011	1	ENSMUSG00000041642
Gm10045	0.0210409	0.0208098	0.139	0.101	1	ENSMUSG00000094326
Anxa6	0.0210614	0.0603721	0.177	0.133	1	ENSMUSG00000018340
Lzts1	0.0210648	0.0266808	0.026	0.011	1	ENSMUSG00000036306
Zdhhc16	0.0210791	0.0400757	0.061	0.036	1	ENSMUSG00000025157
Mylip	0.0210796	-0.120319	0.348	0.382	1	ENSMUSG00000038175
Rab10os	0.0210933	0.0275317	0.042	0.022	1	ENSMUSG00000079179
Ankrd17	0.0211005	0.0499746	0.273	0.216	1	ENSMUSG00000055204
Topbp1	0.0211236	0.0142773	0.07	0.043	1	ENSMUSG00000032555
Eif3l	0.0211453	0.0446258	0.248	0.188	1	ENSMUSG00000033047
Gm17251	0.0211714	0.0342698	0.038	0.019	1	ENSMUSG00000090952
Senp1	0.0212308	-0.0927237	0.062	0.092	1	ENSMUSG00000033075
Ces2e	0.021234	0.04092	0.115	0.08	1	ENSMUSG00000031886
Phf20	0.0212385	0.0168212	0.097	0.065	1	ENSMUSG00000038116
AU019823	0.0212744	-0.115363	0.135	0.171	1	ENSMUSG00000059820
Cwc25	0.0212872	0.0034859	0.109	0.074	1	ENSMUSG00000018541
Plod3	0.0212902	0.0573541	0.154	0.112	1	ENSMUSG00000004846
Nudt18	0.0212917	0.0449695	0.036	0.018	1	ENSMUSG00000045211
Lig3	0.021337	0.0294164	0.048	0.026	1	ENSMUSG00000020697
Hoxaas3	0.0213714	0.0338075	0.032	0.015	1	ENSMUSG00000085696
Rpl34	0.0213725	-0.0522552	0.824	0.815	1	ENSMUSG00000062006
Ddrgk1	0.0214099	0.0197451	0.206	0.154	1	ENSMUSG00000068290
51928	0.0214458	0.0234303	0.033	0.016	1	NA
Pbx2	0.0214672	0.0518876	0.208	0.159	1	ENSMUSG00000034673
Bin3	0.0215218	0.0316357	0.075	0.048	1	ENSMUSG00000022089
Zmym3	0.0215859	0.0242406	0.061	0.036	1	ENSMUSG00000031310
Mrrf	0.0215869	0.0537836	0.138	0.1	1	ENSMUSG00000026887
Col11a1	0.021612	0.0529159	0.112	0.077	1	ENSMUSG00000027966
Serbp1	0.0216411	-0.0674133	0.682	0.658	1	ENSMUSG00000036371
Rbm42	0.021651	0.0290865	0.266	0.203	1	ENSMUSG00000036733
Klhl3	0.0217157	0.0333413	0.062	0.037	1	ENSMUSG00000014164
Rlim	0.0217181	0.0177914	0.106	0.072	1	ENSMUSG00000056537
Sigmar1	0.0217793	0.0250952	0.062	0.037	1	ENSMUSG00000036078
Mrpl20	0.0217864	0.00878979	0.102	0.068	1	ENSMUSG00000029066
Gtpbp1	0.0218086	0.0526831	0.119	0.085	1	ENSMUSG00000042535
Gsto1	0.0218329	0.0472507	0.097	0.066	1	ENSMUSG00000025068
AI413582	0.0218756	0.0255661	0.061	0.036	1	ENSMUSG00000062753
Slc35b4	0.0218759	0.0403149	0.081	0.053	1	ENSMUSG00000018999
Ndufb9	0.0218786	0.0162872	0.199	0.146	1	ENSMUSG00000022354
Dclk1	0.0218878	-0.0771041	0.049	0.077	1	ENSMUSG00000027797
Slc25a26	0.0219291	-0.0412687	0.007	0.021	1	ENSMUSG00000045100
Rhbdd2	0.0219936	0.0259138	0.03	0.014	1	ENSMUSG00000039917
Tufm	0.0220438	0.0112032	0.044	0.023	1	ENSMUSG00000073838
Smim15	0.0220752	0.0366979	0.199	0.149	1	ENSMUSG00000071180
Ivd	0.0221	0.0247347	0.062	0.037	1	ENSMUSG00000027332
Cryl1	0.0221221	0.0287545	0.033	0.016	1	ENSMUSG00000021947
Mrps14	0.0221367	0.0488006	0.181	0.137	1	ENSMUSG00000058267
Them4	0.0221711	0.0299456	0.036	0.018	1	ENSMUSG00000028145
Ier3ip1	0.0221938	0.0672662	0.324	0.261	1	ENSMUSG00000090000
Cd2ap	0.0222172	-0.132037	0.486	0.505	1	ENSMUSG00000061665
Siah2	0.0222241	0.0267007	0.029	0.013	1	ENSMUSG00000036432
Larp7	0.0222469	0.0485779	0.145	0.105	1	ENSMUSG00000027968
Bmf	0.0222553	0.0287412	0.042	0.022	1	ENSMUSG00000040093
Brd2	0.0222656	0.0600343	0.434	0.359	1	ENSMUSG00000024335
2610035D17Rik	0.0223283	0.0124593	0.065	0.039	1	ENSMUSG00000087259
Akt1s1	0.0223394	0.0130848	0.077	0.049	1	ENSMUSG00000011096
Anxa7	0.022345	-0.143705	0.311	0.336	1	ENSMUSG00000021814
Gsk3a	0.0224338	0.0454156	0.164	0.121	1	ENSMUSG00000057177
Tmc4	0.0224344	0.0332141	0.036	0.018	1	ENSMUSG00000019734
Klf2	0.0224385	-0.104574	0.55	0.568	1	ENSMUSG00000055148
Sema6d	0.0224419	0.0541119	0.329	0.26	1	ENSMUSG00000027200
Med13l	0.0224575	0.0324917	0.247	0.189	1	ENSMUSG00000018076
Ulbp1	0.0224743	0.0198021	0.029	0.013	1	ENSMUSG00000079685
Rbbp4	0.022476	0.0405733	0.383	0.309	1	ENSMUSG00000057236
Rpl8	0.0225033	-0.110678	0.459	0.479	1	ENSMUSG00000003970
Cc2d2a	0.0225494	0.0325264	0.06	0.035	1	ENSMUSG00000039765
Noc4l	0.0225546	0.0227393	0.039	0.02	1	ENSMUSG00000033294
Gm13136	0.0226173	0.0200046	0.055	0.032	1	ENSMUSG00000081179
Gstp2	0.0226191	0.0434654	0.459	0.385	1	ENSMUSG00000038155
Pex14	0.0226547	0.0136762	0.139	0.098	1	ENSMUSG00000028975
Ppm1d	0.0226815	0.0303961	0.061	0.036	1	ENSMUSG00000020525
Brk1	0.0226938	0.0595861	0.324	0.257	1	ENSMUSG00000033940
Bace1	0.0227086	0.0345652	0.081	0.053	1	ENSMUSG00000032086
Zbtb5	0.0227463	0.0198522	0.039	0.02	1	ENSMUSG00000049657
Adat3.1	0.0227521	0.0246532	0.119	0.083	1	NA
Sfrp4	0.022799	0.0237126	0.032	0.015	1	ENSMUSG00000021319
Fam213b	0.0228248	0.0156519	0.038	0.019	1	ENSMUSG00000029059
Galc	0.0228472	0.0256551	0.032	0.015	1	ENSMUSG00000021003
Dnmt3b	0.0228569	0.0336746	0.035	0.017	1	ENSMUSG00000027478
U2af1l4	0.0229036	0.0408124	0.103	0.071	1	ENSMUSG00000078765
Lypla2	0.0230224	0.0352363	0.09	0.06	1	ENSMUSG00000028670
B3gat3	0.0230754	0.0422721	0.058	0.034	1	ENSMUSG00000071649
Zfp958	0.0230894	0.0187029	0.032	0.015	1	ENSMUSG00000058748
Polg	0.023098	0.0407111	0.131	0.093	1	ENSMUSG00000039176
Tom1	0.0231238	0.0104778	0.028	0.012	1	ENSMUSG00000042870
Fryl	0.0231292	-0.136155	0.296	0.332	1	ENSMUSG00000070733
Tubg1	0.0231625	0.0115903	0.032	0.015	1	ENSMUSG00000035198
Raf1	0.0231991	0.0379963	0.103	0.071	1	ENSMUSG00000000441
Sco1	0.0232594	-0.0363135	0.009	0.023	1	ENSMUSG00000069844
Dus2	0.0232649	0.0367417	0.016	0.005	1	ENSMUSG00000031901
Zfp41	0.023309	0.00583981	0.036	0.018	1	ENSMUSG00000047003
Zfp467	0.0233353	0.051504	0.065	0.04	1	ENSMUSG00000068551
Lpcat4	0.0233556	0.00906191	0.038	0.019	1	ENSMUSG00000027134
2002-03-01	0.0233693	0.0805484	0.28	0.228	1	ENSMUSG00000073481
Selenos	0.0234513	0.0353671	0.138	0.1	1	ENSMUSG00000075701
Gm42429	0.0235549	-0.0110205	0.19	0.141	1	ENSMUSG00000105373
Abcc3	0.0235622	0.0219722	0.057	0.033	1	ENSMUSG00000020865
54136	0.0235657	-0.00669778	0.122	0.084	1	NA
Zfp982	0.023566	-0.0258428	0.004	0.016	1	ENSMUSG00000078496
Fam135a	0.0236803	0.0406865	0.075	0.049	1	ENSMUSG00000026153
Gm12504	0.0237047	0.00914495	0.032	0.015	1	ENSMUSG00000084274
Gpc4	0.0237128	0.0311825	0.016	0.005	1	ENSMUSG00000031119
Mapk6	0.0237357	0.0474808	0.118	0.082	1	ENSMUSG00000042688
Sirt7	0.0237585	0.039237	0.096	0.065	1	ENSMUSG00000025138
Phf23	0.0237817	0.011603	0.16	0.115	1	ENSMUSG00000018572
Mxd4	0.0238077	0.0884026	0.653	0.568	1	ENSMUSG00000037235
Hpcal1	0.0238827	0.0354515	0.229	0.177	1	ENSMUSG00000071379
Kremen1	0.023928	0.0457722	0.145	0.106	1	ENSMUSG00000020393
Gapvd1	0.023931	0.0266956	0.193	0.145	1	ENSMUSG00000026867
Apbb1	0.0239468	-0.0279245	0.004	0.016	1	ENSMUSG00000037032
Scamp4	0.0239593	0.0231965	0.118	0.082	1	ENSMUSG00000113949
Ndufa2	0.0239705	0.0574932	0.534	0.445	1	ENSMUSG00000014294
Glmn	0.0240145	0.0229059	0.057	0.033	1	ENSMUSG00000029276
Rpl7	0.0240515	-0.0541124	0.846	0.828	1	ENSMUSG00000043716
Ahnak	0.0240661	-0.122495	0.586	0.585	1	ENSMUSG00000069833
Sucla2	0.0241017	0.0234874	0.135	0.096	1	ENSMUSG00000022110
St8sia6	0.0241118	-0.102691	0.064	0.093	1	ENSMUSG00000003418
Stk38l	0.0241244	-0.053706	0.025	0.046	1	ENSMUSG00000001630
AA467197	0.0241299	0.0122666	0.016	0.005	1	ENSMUSG00000033213
Adcy9	0.0241299	0.0206648	0.016	0.005	1	ENSMUSG00000005580
Gm12960	0.0241473	-0.0187626	0.02	0.039	1	ENSMUSG00000100514
Pf4	0.0241498	-0.0489458	0.028	0.05	1	ENSMUSG00000029373
Esam	0.0241967	-0.0548539	0.856	0.838	1	ENSMUSG00000001946
C920006O11Rik	0.0242064	0.0157565	0.016	0.005	1	ENSMUSG00000097574
Tbx3	0.024329	0.0668645	0.102	0.07	1	ENSMUSG00000018604
Exoc3l	0.024336	0.0389991	0.118	0.082	1	ENSMUSG00000043251
Commd9	0.0244448	0.0147758	0.039	0.02	1	ENSMUSG00000027163
Pgap1	0.0244759	0.0128909	0.016	0.005	1	ENSMUSG00000073678
Lmbrd1	0.0245098	0.0383724	0.234	0.182	1	ENSMUSG00000073725
Jpt1	0.024544	0.0387084	0.106	0.073	1	ENSMUSG00000020737
Anxa8	0.0245754	0.0321529	0.01	0.002	1	ENSMUSG00000021950
Rtf1	0.0246504	0.0540475	0.271	0.215	1	ENSMUSG00000027304
Tcf20	0.0246667	0.0233534	0.118	0.082	1	ENSMUSG00000041852
Tlnrd1	0.0247096	0.058788	0.248	0.193	1	ENSMUSG00000070462
Taldo1	0.0247125	0.0620117	0.255	0.198	1	ENSMUSG00000025503
Atpaf1	0.0247592	0.0262575	0.054	0.031	1	ENSMUSG00000028710
Mybl2	0.0247827	0.0126418	0.01	0.002	1	ENSMUSG00000017861
Hnrnpr	0.0247893	0.0431612	0.206	0.156	1	ENSMUSG00000066037
Amigo3	0.0248348	0.0195318	0.01	0.002	1	ENSMUSG00000032593
Aim2	0.0248363	0.029703	0.054	0.031	1	ENSMUSG00000037860
Abcc5	0.0248468	0.0177257	0.103	0.07	1	ENSMUSG00000022822
Tdp2	0.0248477	0.0284694	0.07	0.044	1	ENSMUSG00000035958
Rpl21-ps14	0.0248554	0.0341538	0.046	0.026	1	ENSMUSG00000062152
Mfsd1	0.0248742	0.0428371	0.21	0.162	1	ENSMUSG00000027775
Plp1	0.0249392	0.0155108	0.01	0.002	1	ENSMUSG00000031425
Spred2	0.0249501	0.0492507	0.1	0.069	1	ENSMUSG00000045671
Parp1	0.0250289	0.0298519	0.102	0.069	1	ENSMUSG00000026496
Cd1d2	0.025044	0.0192773	0.01	0.002	1	ENSMUSG00000041750
Gm11410	0.025044	0.0135929	0.01	0.002	1	ENSMUSG00000083219
Adck5	0.025044	0.0212417	0.01	0.002	1	ENSMUSG00000022550
Ephb3	0.025044	0.0147446	0.01	0.002	1	ENSMUSG00000005958
Ei24	0.025086	0.0513518	0.205	0.159	1	ENSMUSG00000062762
Apopt1	0.0251206	0.034702	0.157	0.114	1	ENSMUSG00000037787
Cops3	0.0251276	0.027991	0.078	0.051	1	ENSMUSG00000019373
Gm20521	0.0252105	0.0604676	0.401	0.334	1	ENSMUSG00000092232
Dhx36	0.0253236	0.0373445	0.181	0.137	1	ENSMUSG00000027770
Smarce1-ps1	0.0253333	-0.0213103	0.01	0.025	1	ENSMUSG00000094568
Cct7	0.0253414	0.0433048	0.17	0.127	1	ENSMUSG00000030007
Traf7	0.0253482	0.0253044	0.171	0.128	1	ENSMUSG00000052752
Arpc1b	0.025364	-0.0681004	0.743	0.699	1	ENSMUSG00000029622
Hdac1	0.0254151	-0.111105	0.318	0.353	1	ENSMUSG00000028800
Sae1	0.0254185	0.0317205	0.131	0.093	1	ENSMUSG00000052833
Vhl	0.0254841	0.0480013	0.099	0.068	1	ENSMUSG00000033933
Gm29666	0.0255398	0.0409404	0.081	0.054	1	ENSMUSG00000100967
Cdkn1b	0.0255838	-0.147825	0.29	0.318	1	ENSMUSG00000003031
Esd	0.0255961	0.0365567	0.267	0.206	1	ENSMUSG00000021996
Tgds	0.025617	0.021734	0.068	0.043	1	ENSMUSG00000022130
Als2cl	0.0256202	0.0241273	0.132	0.094	1	ENSMUSG00000044037
Atp6v0a2	0.025664	0.0286971	0.237	0.18	1	ENSMUSG00000038023
Vcl	0.0256766	0.0595558	0.258	0.203	1	ENSMUSG00000021823
Fstl1	0.0256875	0.0445948	0.463	0.389	1	ENSMUSG00000022816
Ccdc59	0.0257556	0.0310843	0.229	0.177	1	ENSMUSG00000019897
Ctsb	0.0257672	-0.0557566	0.811	0.796	1	ENSMUSG00000021939
Rpl21-ps12	0.0257776	0.0190228	0.078	0.052	1	ENSMUSG00000058700
Gpalpp1	0.0257808	-0.104319	0.068	0.096	1	ENSMUSG00000022008
Hist1h2ah	0.0258792	-0.0114185	0.013	0.029	1	ENSMUSG00000069302
Hist1h2ag	0.0258792	-0.0114185	0.013	0.029	1	ENSMUSG00000069301
Hist1h2ad	0.0258792	-0.0114185	0.013	0.029	1	ENSMUSG00000071478
Exoc3l4	0.0259677	0.0286973	0.103	0.071	1	ENSMUSG00000021280
AC123954.1	0.0259943	0.0264186	0.049	0.028	1	ENSMUSG00000113255
Dync1li1	0.0260222	0.0285216	0.21	0.161	1	ENSMUSG00000032435
Hoxa5	0.0260245	0.0486375	0.186	0.142	1	ENSMUSG00000038253
Cox20	0.026045	0.0534376	0.257	0.204	1	ENSMUSG00000026500
4921524J17Rik	0.0261154	0.0800559	0.225	0.178	1	ENSMUSG00000036934
Gnl3l	0.0261508	0.0192499	0.139	0.1	1	ENSMUSG00000025266
Apol9a	0.0261596	0.0261922	0.017	0.006	1	ENSMUSG00000057346
Vps26a	0.0261672	-0.0976616	0.087	0.118	1	ENSMUSG00000020078
Rest	0.026192	0.0461973	0.136	0.098	1	ENSMUSG00000029249
Ppp1r12a	0.0262004	0.0699643	0.335	0.275	1	ENSMUSG00000019907
Armc5	0.0263108	0.0286464	0.049	0.028	1	ENSMUSG00000042178
H2afz	0.0263564	0.0564973	0.478	0.393	1	ENSMUSG00000037894
E130309D02Rik	0.0263615	0.0252654	0.054	0.031	1	ENSMUSG00000039244
Ier2	0.0263765	0.0468261	0.363	0.291	1	ENSMUSG00000053560
Thbs1	0.0263818	0.0269205	0.054	0.031	1	ENSMUSG00000040152
Fzr1	0.0263925	0.024834	0.118	0.082	1	ENSMUSG00000020235
Eya3	0.0264475	0.0213987	0.077	0.05	1	ENSMUSG00000028886
Slfn9	0.0264704	0.0267993	0.017	0.006	1	ENSMUSG00000069793
Leng8	0.0265808	0.0356125	0.151	0.111	1	ENSMUSG00000035545
Gm37240	0.0266143	-0.048073	0.029	0.051	1	ENSMUSG00000102805
Acvr1	0.0266169	0.0426848	0.126	0.091	1	ENSMUSG00000026836
Agap3	0.02667	0.0175165	0.091	0.061	1	ENSMUSG00000023353
Samd4	0.0266833	0.0402599	0.062	0.038	1	ENSMUSG00000021838
Afap1l1	0.0267689	0.0283937	0.271	0.213	1	ENSMUSG00000033032
Gm10524	0.0267883	-0.02632	0.226	0.171	1	ENSMUSG00000097141
Gbp3	0.0268224	0.0736775	0.107	0.076	1	ENSMUSG00000028268
Actb	0.0268524	-0.0284111	0.991	0.988	1	ENSMUSG00000029580
Enc1	0.0268566	0.051809	0.152	0.114	1	ENSMUSG00000041773
Gm42892	0.0269025	-0.0283768	0	0.007	1	ENSMUSG00000106073
Cldn13	0.0269025	-0.0188403	0	0.007	1	ENSMUSG00000008843
Gm4759	0.0269025	-0.0249151	0	0.007	1	ENSMUSG00000053541
E230032D23Rik	0.0269025	-0.017022	0	0.007	1	ENSMUSG00000109251
51776	0.0269025	-0.00671009	0	0.007	1	NA
Gm28052	0.0269025	-0.00780688	0	0.007	1	ENSMUSG00000099329
Homer3	0.0269355	0.0440986	0.109	0.076	1	ENSMUSG00000003573
Tmem241	0.0269858	0.0328875	0.048	0.027	1	ENSMUSG00000049411
Arhgap12	0.0269983	0.042355	0.083	0.055	1	ENSMUSG00000041225
Spg11	0.0270727	0.025295	0.051	0.029	1	ENSMUSG00000033396
Pygm	0.0271813	0.0173168	0.017	0.006	1	ENSMUSG00000032648
Ucp2	0.0272072	0.0682665	0.54	0.448	1	ENSMUSG00000033685
Gtf2ird1	0.027259	0.0363588	0.118	0.082	1	ENSMUSG00000023079
Fam219a	0.0272989	0.0277231	0.228	0.175	1	ENSMUSG00000028439
Tctn2	0.0273014	0.016203	0.017	0.006	1	ENSMUSG00000029386
Gsr	0.0273129	0.0302316	0.062	0.038	1	ENSMUSG00000031584
Rps24-ps3	0.0273397	0.0207542	0.052	0.03	1	ENSMUSG00000081049
Eif3m	0.0273532	0.0470423	0.21	0.164	1	ENSMUSG00000027170
Luc7l3	0.0273997	-0.144791	0.319	0.346	1	ENSMUSG00000020863
Brpf1	0.0274036	0.0302585	0.064	0.039	1	ENSMUSG00000001632
Zfp605	0.027422	0.0112079	0.017	0.006	1	ENSMUSG00000023284
Ube2j2	0.0274849	0.0297014	0.122	0.087	1	ENSMUSG00000023286
Hbb-bt	0.0275123	-0.0603266	0.015	0.031	1	ENSMUSG00000073940
Glce	0.0275658	0.0318542	0.061	0.037	1	ENSMUSG00000032252
Nol8	0.0275736	0.0233043	0.089	0.059	1	ENSMUSG00000021392
Snx11	0.0276026	0.0442115	0.12	0.085	1	ENSMUSG00000020876
Rnf152	0.0276115	0.0573147	0.136	0.099	1	ENSMUSG00000047496
Efcab2	0.0276239	0.0164612	0.017	0.006	1	ENSMUSG00000026495
Pla2g6	0.0276544	0.0321015	0.049	0.028	1	ENSMUSG00000042632
Ndufb3	0.0276631	0.0469609	0.308	0.246	1	ENSMUSG00000026032
[truncated: 18,089 more rows]

## Sheet: MSC
gene_name	p_val	avg_log2FC	pct.1	pct.2	p_val_adj	ensembl
Gm42418	0	-0.357963	0.957	0.977	0	ENSMUSG00000098178
Serpine2	1.26044e-202	-0.207571	0.991	0.986	2.53197e-198	ENSMUSG00000026249
Igfbp3	1.39605e-170	-0.619419	0.186	0.435	2.80439e-166	ENSMUSG00000020427
Mgp	5.52083e-164	-0.588253	0.48	0.685	1.10902e-159	ENSMUSG00000030218
mt-Nd4l	1.13381e-163	-0.230021	0.982	0.979	2.27759e-159	ENSMUSG00000065947
Gm10222	2.09318e-160	-0.240034	0.972	0.975	4.20478e-156	ENSMUSG00000067736
Dhrs3	5.44892e-154	0.425316	0.584	0.274	1.09458e-149	ENSMUSG00000066026
mt-Nd5	1.25032e-145	-0.227357	0.967	0.963	2.51165e-141	ENSMUSG00000064367
mt-Atp8	1.42137e-140	-0.280655	0.888	0.907	2.85526e-136	ENSMUSG00000064356
Angptl4	4.89009e-136	0.368869	0.389	0.138	9.82321e-132	ENSMUSG00000002289
Ptma	1.07062e-135	-0.199375	0.946	0.943	2.15067e-131	ENSMUSG00000026238
mt-Nd2	1.13952e-127	-0.172888	0.997	0.996	2.28908e-123	ENSMUSG00000064345
Ibsp	2.74098e-126	-0.290818	0.861	0.904	5.50608e-122	ENSMUSG00000029306
Col6a1	1.38695e-125	-0.271515	0.848	0.866	2.7861e-121	ENSMUSG00000001119
Igf2	4.73707e-125	0.408724	0.331	0.118	9.51582e-121	ENSMUSG00000048583
Ltbp2	4.72717e-123	0.401736	0.621	0.346	9.49594e-119	ENSMUSG00000002020
mt-Co1	1.51148e-122	-0.158434	0.997	0.997	3.03626e-118	ENSMUSG00000064351
Gm49394	1.04567e-121	0.393112	0.326	0.116	2.10054e-117	ENSMUSG00000115302
mt-Cytb	3.07721e-120	-0.159494	0.998	0.998	6.1815e-116	ENSMUSG00000064370
Serping1	1.7462e-118	-0.182764	0.958	0.954	3.50776e-114	ENSMUSG00000023224
mt-Nd4	3.61398e-118	-0.163615	0.997	0.997	7.25976e-114	ENSMUSG00000064363
Angpt4	5.04157e-118	0.383765	0.42	0.176	1.01275e-113	ENSMUSG00000027460
Cxcl12	3.21362e-117	-0.161885	0.992	0.981	6.45551e-113	ENSMUSG00000061353
mt-Rnr1	3.14354e-116	-0.234084	0.961	0.958	6.31474e-112	ENSMUSG00000064337
Prg4	4.17429e-116	0.382927	0.293	0.093	8.38532e-112	ENSMUSG00000006014
Plpp3	6.52673e-116	-0.204992	0.938	0.928	1.31109e-111	ENSMUSG00000028517
Gm28661	7.04005e-116	-0.290171	0.997	0.997	1.41421e-111	ENSMUSG00000102070
Pim3	1.42959e-109	0.308612	0.245	0.066	2.87175e-105	ENSMUSG00000035828
Spry1	8.13884e-106	0.361584	0.73	0.463	1.63493e-101	ENSMUSG00000037211
Clu	7.3366e-100	-0.253817	0.826	0.821	1.47378e-95	ENSMUSG00000022037
B2m	3.19119e-99	-0.141511	0.991	0.989	6.41045e-95	ENSMUSG00000060802
Cst3	1.64274e-98	-0.157788	0.989	0.986	3.29994e-94	ENSMUSG00000027447
mt-Atp6	2.27026e-98	-0.149369	0.997	0.997	4.5605e-94	ENSMUSG00000064357
C1ra	2.50677e-96	-0.254944	0.85	0.845	5.03561e-92	ENSMUSG00000055172
Eef1a1	4.36531e-95	-0.156761	0.949	0.936	8.76903e-91	ENSMUSG00000037742
Lgals1	6.01705e-95	0.309651	0.522	0.273	1.2087e-90	ENSMUSG00000068220
Gm10925	6.09454e-94	-0.15502	0.997	0.997	1.22427e-89	ENSMUSG00000100862
Lepr	3.59913e-92	-0.193435	0.924	0.895	7.22994e-88	ENSMUSG00000057722
Bmp6	2.76907e-91	-0.347849	0.628	0.69	5.5625e-87	ENSMUSG00000039004
Sfrp1	4.50536e-91	0.342469	0.551	0.319	9.05037e-87	ENSMUSG00000031548
Tpt1	2.36355e-90	-0.178676	0.929	0.919	4.74791e-86	ENSMUSG00000060126
mt-Nd1	1.87341e-89	-0.142758	0.997	0.995	3.76331e-85	ENSMUSG00000064341
Kitl	3.08023e-89	-0.185099	0.898	0.882	6.18756e-85	ENSMUSG00000019966
mt-Co2	8.2931e-84	-0.136829	0.997	0.998	1.66592e-79	ENSMUSG00000064354
Prss34	1.26442e-82	-0.22522	0.001	0.072	2.53998e-78	ENSMUSG00000056399
Emp1	1.76728e-82	0.285018	0.791	0.55	3.55011e-78	ENSMUSG00000030208
Itm2b	2.44185e-80	-0.133535	0.973	0.957	4.90519e-76	ENSMUSG00000022108
mt-Rnr2	2.60064e-80	-0.184585	0.979	0.973	5.22417e-76	ENSMUSG00000064339
Col6a2	5.15771e-77	-0.262201	0.727	0.755	1.03608e-72	ENSMUSG00000020241
Gdpd2	8.07449e-77	-0.158631	0.932	0.905	1.622e-72	ENSMUSG00000019359
Prelp	1.0629e-75	-0.389059	0.499	0.609	2.13515e-71	ENSMUSG00000041577
Gm29216	4.54535e-74	0.0275528	0.381	0.208	9.1307e-70	ENSMUSG00000101249
Nedd4	2.59383e-73	-0.121223	0.948	0.917	5.21049e-69	ENSMUSG00000032216
Gm28437	2.95346e-72	-0.183732	0.977	0.975	5.93291e-68	ENSMUSG00000101111
Bgn	7.3687e-72	-0.116583	0.978	0.963	1.48022e-67	ENSMUSG00000031375
App	1.13007e-71	-0.126533	0.974	0.954	2.27009e-67	ENSMUSG00000022892
Adamts5	2.73634e-70	0.284954	0.401	0.211	5.49675e-66	ENSMUSG00000022894
Notch3	5.48459e-69	-0.394551	0.376	0.493	1.10174e-64	ENSMUSG00000038146
Plxna2	1.35795e-68	0.277849	0.564	0.346	2.72786e-64	ENSMUSG00000026640
Tuba1c	1.78148e-68	0.255727	0.634	0.396	3.57863e-64	ENSMUSG00000043091
Ncam1	1.63148e-66	0.246034	0.303	0.14	3.27732e-62	ENSMUSG00000039542
Tmem176b	5.80469e-66	-0.130274	0.979	0.963	1.16605e-61	ENSMUSG00000029810
Laptm4a	1.56147e-65	-0.132694	0.936	0.91	3.13668e-61	ENSMUSG00000020585
Ckb	1.18956e-64	0.179296	0.245	0.099	2.38959e-60	ENSMUSG00000001270
Gas6	2.25083e-64	-0.130997	0.935	0.902	4.52146e-60	ENSMUSG00000031451
Loxl2	6.3888e-64	0.236832	0.56	0.345	1.28338e-59	ENSMUSG00000034205
mt-Co3	3.56122e-62	-0.136938	0.991	0.986	7.15379e-58	ENSMUSG00000064358
Slc36a2	1.2578e-60	0.17282	0.168	0.053	2.52667e-56	ENSMUSG00000020264
Tnfrsf19	5.51632e-60	0.24227	0.54	0.33	1.10812e-55	ENSMUSG00000060548
Mdk	6.44853e-60	-0.323856	0.522	0.591	1.29538e-55	ENSMUSG00000027239
Wdr1	1.87416e-57	0.22657	0.531	0.323	3.76482e-53	ENSMUSG00000005103
H2-D1	2.65542e-57	-0.109746	0.996	0.994	5.33422e-53	ENSMUSG00000073411
Thbs1	4.7093e-57	0.217693	0.349	0.184	9.46003e-53	ENSMUSG00000040152
Col10a1	7.37617e-57	0.167055	0.131	0.034	1.48173e-52	ENSMUSG00000039462
Ehd3	2.51919e-56	0.218822	0.449	0.261	5.06054e-52	ENSMUSG00000024065
Fth1	2.78901e-55	-0.116633	0.967	0.953	5.60256e-51	ENSMUSG00000024661
Angptl1	4.56885e-55	-0.295737	0.07	0.171	9.1779e-51	ENSMUSG00000033544
Sdc4	5.88235e-54	0.194522	0.321	0.166	1.18165e-49	ENSMUSG00000017009
Tmem2	3.57394e-53	0.215697	0.342	0.185	7.17933e-49	ENSMUSG00000024754
Runx1	9.59252e-53	-0.281026	0.595	0.636	1.92695e-48	ENSMUSG00000022952
C6	9.75329e-52	0.236661	0.577	0.381	1.95924e-47	ENSMUSG00000022181
Igfbp5	9.99475e-51	-0.146705	0.96	0.954	2.00775e-46	ENSMUSG00000026185
Snai2	3.26807e-50	-0.310895	0.496	0.562	6.5649e-46	ENSMUSG00000022676
Kctd12	4.02388e-50	-0.221863	0.71	0.712	8.08316e-46	ENSMUSG00000098557
Gm28438	4.90428e-50	-0.172549	0.97	0.974	9.85171e-46	ENSMUSG00000101939
Olfml3	9.54716e-50	0.234238	0.762	0.547	1.91783e-45	ENSMUSG00000027848
Col1a2	4.75846e-49	-0.0948577	0.998	0.994	9.5588e-45	ENSMUSG00000029661
S1pr1	6.54368e-49	0.202727	0.425	0.251	1.31449e-44	ENSMUSG00000045092
Sod3	7.5444e-49	0.189223	0.391	0.222	1.51552e-44	ENSMUSG00000072941
Thsd4	9.22536e-49	0.231081	0.303	0.164	1.85319e-44	ENSMUSG00000032289
Pdgfa	9.05216e-48	0.190631	0.358	0.201	1.8184e-43	ENSMUSG00000025856
H2-Q6	1.37853e-47	0.193441	0.527	0.34	2.76918e-43	ENSMUSG00000073409
Map1b	3.72347e-47	0.190056	0.28	0.143	7.47971e-43	ENSMUSG00000052727
Pten	1.16779e-45	-0.219036	0.705	0.701	2.34585e-41	ENSMUSG00000013663
Ifitm3	1.52457e-45	-0.116378	0.943	0.911	3.06255e-41	ENSMUSG00000025492
Hsp90b1	1.55802e-44	-0.11199	0.928	0.891	3.12976e-40	ENSMUSG00000020048
Hspa8	1.69851e-44	-0.265984	0.677	0.702	3.41198e-40	ENSMUSG00000015656
Mme	1.82796e-44	-0.204284	0.72	0.708	3.67201e-40	ENSMUSG00000027820
Tgm2	2.84424e-44	0.188909	0.446	0.274	5.71351e-40	ENSMUSG00000037820
Serpina12	3.35385e-44	0.176877	0.276	0.145	6.7372e-40	ENSMUSG00000041567
Rps29	1.14155e-43	-0.146114	0.883	0.851	2.29315e-39	ENSMUSG00000034892
Tmem176a	1.65903e-43	-0.102463	0.942	0.9	3.33267e-39	ENSMUSG00000023367
Axl	3.72374e-43	0.170737	0.279	0.147	7.48025e-39	ENSMUSG00000002602
Rps24	3.92804e-43	-0.166296	0.817	0.79	7.89065e-39	ENSMUSG00000025290
Errfi1	5.77819e-43	0.186092	0.388	0.23	1.16072e-38	ENSMUSG00000028967
Pgd	5.44594e-42	0.155119	0.344	0.197	1.09398e-37	ENSMUSG00000028961
Cstb	3.40621e-41	0.186974	0.592	0.4	6.84239e-37	ENSMUSG00000005054
Net1	1.48435e-40	0.146074	0.274	0.146	2.98176e-36	ENSMUSG00000021215
Rhoc	1.79885e-40	0.162247	0.417	0.254	3.61353e-36	ENSMUSG00000002233
Sparc	3.98347e-40	-0.0933458	0.997	0.996	8.00199e-36	ENSMUSG00000018593
Gpx3	6.53958e-40	-0.113562	0.962	0.948	1.31367e-35	ENSMUSG00000018339
Lamp2	1.43109e-39	-0.163487	0.768	0.735	2.87477e-35	ENSMUSG00000016534
Gnas	2.27851e-39	-0.0881583	0.956	0.919	4.57707e-35	ENSMUSG00000027523
Eya2	5.22767e-39	0.150242	0.24	0.124	1.05013e-34	ENSMUSG00000017897
Col1a1	7.04927e-39	-0.242489	0.713	0.725	1.41606e-34	ENSMUSG00000001506
H3f3a	7.24448e-39	-0.164257	0.802	0.774	1.45527e-34	ENSMUSG00000060743
Cyr61	1.25117e-38	0.1536	0.3	0.169	2.51336e-34	ENSMUSG00000028195
Cyp1b1	1.97539e-38	-0.113483	0.915	0.871	3.96817e-34	ENSMUSG00000024087
Scp2	4.84665e-38	0.155047	0.579	0.406	9.73596e-34	ENSMUSG00000028603
Marcks	4.85612e-38	-0.0830253	0.945	0.909	9.75496e-34	ENSMUSG00000069662
Gnao1	1.11426e-37	0.151684	0.333	0.195	2.23832e-33	ENSMUSG00000031748
Htra3	2.201e-37	0.142674	0.198	0.096	4.42137e-33	ENSMUSG00000029096
Mrc2	4.10647e-37	0.135906	0.207	0.102	8.24908e-33	ENSMUSG00000020695
Igfbp7	5.55349e-37	-0.0873543	0.991	0.979	1.11558e-32	ENSMUSG00000036256
Slc5a3	1.34419e-36	0.187463	0.49	0.326	2.70021e-32	ENSMUSG00000089774
Mt2	2.27191e-36	0.186513	0.397	0.254	4.56382e-32	ENSMUSG00000031762
Adamts9	2.34764e-36	0.131556	0.194	0.094	4.71594e-32	ENSMUSG00000030022
Bmp4	2.50784e-36	0.177456	0.54	0.371	5.03774e-32	ENSMUSG00000021835
Pdk4	3.33529e-36	0.132485	0.223	0.114	6.69994e-32	ENSMUSG00000019577
Col4a2	7.99184e-36	0.174203	0.697	0.497	1.6054e-31	ENSMUSG00000031503
Ldha	1.8776e-35	0.127734	0.375	0.227	3.77171e-31	ENSMUSG00000063229
Glrx	1.90915e-35	0.147564	0.298	0.172	3.83511e-31	ENSMUSG00000021591
Il7	3.1572e-35	0.142635	0.351	0.21	6.34219e-31	ENSMUSG00000040329
Bcat1	5.89652e-35	0.128445	0.146	0.062	1.18449e-30	ENSMUSG00000030268
Tmsb4x	8.15069e-35	-0.0782702	0.988	0.973	1.63731e-30	ENSMUSG00000049775
Rps8	8.64938e-35	-0.151996	0.891	0.875	1.73749e-30	ENSMUSG00000047675
Heyl	9.50402e-35	-0.244081	0.077	0.153	1.90917e-30	ENSMUSG00000032744
S100a11	1.00428e-34	-0.0988309	0.914	0.873	2.0174e-30	ENSMUSG00000027907
Lmo4	1.44298e-34	0.174517	0.741	0.547	2.89866e-30	ENSMUSG00000028266
C5ar2	1.69457e-34	0.104238	0.072	0.017	3.40406e-30	ENSMUSG00000074361
Fzd1	3.27261e-34	0.154749	0.465	0.303	6.57403e-30	ENSMUSG00000044674
Rassf2	9.38985e-34	0.0992011	0.073	0.018	1.88623e-29	ENSMUSG00000027339
Glis2	9.50096e-34	0.126586	0.237	0.128	1.90855e-29	ENSMUSG00000014303
Cbfa2t3	1.05565e-33	-0.198246	0.047	0.112	2.12058e-29	ENSMUSG00000006362
mt-Nd3	1.67421e-33	-0.0970496	0.993	0.986	3.36315e-29	ENSMUSG00000064360
Nudt4	1.95046e-33	-0.228852	0.597	0.602	3.91808e-29	ENSMUSG00000020029
Cdc42	2.97272e-33	-0.146198	0.778	0.732	5.9716e-29	ENSMUSG00000006699
Fads1	3.13316e-33	0.119869	0.335	0.199	6.29389e-29	ENSMUSG00000010663
Ak1	4.54993e-33	0.131656	0.317	0.189	9.13991e-29	ENSMUSG00000026817
Zfp36l1	6.21659e-33	-0.170908	0.794	0.764	1.24879e-28	ENSMUSG00000021127
Psap	6.84975e-33	-0.097603	0.935	0.895	1.37598e-28	ENSMUSG00000004207
Map1lc3a	1.29628e-32	0.140907	0.461	0.302	2.60397e-28	ENSMUSG00000027602
Insig1	1.34027e-32	0.108495	0.147	0.066	2.69233e-28	ENSMUSG00000045294
Tpbg	1.34687e-32	0.125406	0.168	0.08	2.7056e-28	ENSMUSG00000035274
Bst2	1.60442e-32	0.129922	0.334	0.202	3.22295e-28	ENSMUSG00000046718
Phgdh	1.67429e-32	0.0976334	0.091	0.029	3.36331e-28	ENSMUSG00000053398
2001-03-01	4.63443e-32	0.126156	0.36	0.222	9.30965e-28	ENSMUSG00000026621
H2-T22	4.90583e-32	0.118817	0.311	0.185	9.85483e-28	ENSMUSG00000056116
Necap2	6.18444e-32	0.124178	0.326	0.196	1.24233e-27	ENSMUSG00000028923
Dapk2	7.26995e-32	0.103045	0.125	0.051	1.46039e-27	ENSMUSG00000032380
Comp	9.28979e-32	0.147907	0.16	0.076	1.86613e-27	ENSMUSG00000031849
Ebf3	1.57099e-31	-0.142651	0.793	0.758	3.1558e-27	ENSMUSG00000010476
Ctgf	1.64196e-31	0.157933	0.522	0.357	3.29838e-27	ENSMUSG00000019997
Vcl	1.97095e-31	0.12304	0.429	0.275	3.95924e-27	ENSMUSG00000021823
Trp53inp2	2.48094e-31	0.120405	0.25	0.14	4.98371e-27	ENSMUSG00000038375
Sema5a	6.15034e-31	0.142328	0.509	0.342	1.23548e-26	ENSMUSG00000022231
Dbi	1.26879e-30	0.126463	0.475	0.316	2.54875e-26	ENSMUSG00000026385
Rps28	1.30387e-30	-0.183609	0.772	0.736	2.61921e-26	ENSMUSG00000067288
Dapk1	1.56872e-30	0.14142	0.425	0.278	3.15125e-26	ENSMUSG00000021559
Fscn1	3.30739e-30	0.12163	0.443	0.289	6.64388e-26	ENSMUSG00000029581
2310022B05Rik	4.35031e-30	0.130067	0.501	0.334	8.73889e-26	ENSMUSG00000031983
Qpct	4.71537e-30	0.0918729	0.123	0.051	9.47224e-26	ENSMUSG00000024084
Ermp1	5.12685e-30	0.119296	0.288	0.173	1.02988e-25	ENSMUSG00000046324
Hist1h2bc	5.24566e-30	0.131437	0.492	0.331	1.05375e-25	ENSMUSG00000018102
Pdzrn4	5.7029e-30	0.130628	0.209	0.113	1.1456e-25	ENSMUSG00000036218
Picalm	5.97964e-30	-0.213956	0.607	0.611	1.20119e-25	ENSMUSG00000039361
Aqp7	6.21504e-30	0.0839259	0.067	0.017	1.24848e-25	ENSMUSG00000028427
Slc22a3	9.23695e-30	0.0842774	0.07	0.019	1.85552e-25	ENSMUSG00000023828
Id3	1.4696e-29	-0.22955	0.612	0.623	2.95214e-25	ENSMUSG00000007872
Rbp4	1.68208e-29	0.0866678	0.083	0.027	3.37896e-25	ENSMUSG00000024990
Myl9	2.45254e-29	0.121422	0.345	0.214	4.92666e-25	ENSMUSG00000067818
Olfml2a	2.90961e-29	0.135897	0.48	0.32	5.84482e-25	ENSMUSG00000046618
Sat1	3.37486e-29	0.131294	0.403	0.262	6.77942e-25	ENSMUSG00000025283
Il1r1	3.55556e-29	-0.276425	0.345	0.414	7.1424e-25	ENSMUSG00000026072
Sulf2	3.9978e-29	0.0843583	0.05	0.008	8.03078e-25	ENSMUSG00000006800
Sort1	7.37391e-29	0.102832	0.169	0.085	1.48127e-24	ENSMUSG00000068747
Wisp2	9.74839e-29	-0.194883	0.671	0.693	1.95826e-24	ENSMUSG00000027656
Lrp1	1.02023e-28	0.142302	0.526	0.36	2.04944e-24	ENSMUSG00000040249
St3gal6	1.37813e-28	-0.2147	0.585	0.584	2.76839e-24	ENSMUSG00000022747
Slc48a1	1.38749e-28	0.108725	0.213	0.117	2.78718e-24	ENSMUSG00000081534
Fbn1	1.52885e-28	-0.14141	0.793	0.754	3.07116e-24	ENSMUSG00000027204
Sun2	1.54027e-28	0.118403	0.371	0.236	3.0941e-24	ENSMUSG00000042524
H2-K1	2.35616e-28	-0.0737425	0.99	0.98	4.73306e-24	ENSMUSG00000061232
Cdc42ep3	2.57372e-28	0.114768	0.407	0.265	5.17008e-24	ENSMUSG00000036533
Enpp5	4.17564e-28	0.119478	0.367	0.234	8.38802e-24	ENSMUSG00000023960
Ctnnbip1	4.53766e-28	0.0983122	0.206	0.112	9.11526e-24	ENSMUSG00000028988
Rftn1	4.96383e-28	0.122415	0.441	0.292	9.97134e-24	ENSMUSG00000039316
Thbs2	8.14283e-28	0.108791	0.222	0.125	1.63573e-23	ENSMUSG00000023885
Ebp	8.90305e-28	0.0858265	0.267	0.156	1.78845e-23	ENSMUSG00000031168
Txnip	1.0385e-27	0.139485	0.577	0.407	2.08614e-23	ENSMUSG00000038393
Agpat3	1.2194e-27	0.0999608	0.254	0.149	2.44953e-23	ENSMUSG00000001211
Sfrp2	1.82819e-27	0.0995279	0.093	0.035	3.67247e-23	ENSMUSG00000027996
Itm2c	2.32429e-27	-0.133829	0.786	0.729	4.66904e-23	ENSMUSG00000026223
Grina	6.08131e-27	0.0954964	0.237	0.137	1.22161e-22	ENSMUSG00000022564
Rmnd1	6.86688e-27	0.136302	0.213	0.123	1.37942e-22	ENSMUSG00000019763
Hnrnpa2b1	8.08345e-27	-0.122299	0.808	0.756	1.6238e-22	ENSMUSG00000004980
Il1rn	8.22106e-27	0.155635	0.467	0.324	1.65145e-22	ENSMUSG00000026981
Cpt1a	9.91119e-27	0.101007	0.21	0.117	1.99096e-22	ENSMUSG00000024900
Atp2b4	1.07959e-26	-0.228323	0.102	0.173	2.16868e-22	ENSMUSG00000026463
Emilin1	1.13573e-26	0.111189	0.291	0.18	2.28146e-22	ENSMUSG00000029163
Nupr1	1.36587e-26	0.141807	0.559	0.4	2.74376e-22	ENSMUSG00000030717
Col2a1	1.37289e-26	0.117421	0.423	0.279	2.75787e-22	ENSMUSG00000022483
Grem1	1.73567e-26	-0.204825	0.614	0.612	3.48661e-22	ENSMUSG00000074934
Kcnk2	3.37681e-26	0.143153	0.213	0.124	6.78333e-22	ENSMUSG00000037624
Clip2	4.4188e-26	0.0855102	0.163	0.083	8.87649e-22	ENSMUSG00000063146
Emb	5.34835e-26	0.120742	0.52	0.361	1.07438e-21	ENSMUSG00000021728
Pgm2	5.60777e-26	0.0897631	0.138	0.067	1.12649e-21	ENSMUSG00000025791
Porcn	5.96551e-26	0.0947064	0.201	0.112	1.19835e-21	ENSMUSG00000031169
Fbln5	9.37471e-26	-0.0755716	0.926	0.882	1.88319e-21	ENSMUSG00000021186
Man1c1	1.01604e-25	0.109385	0.185	0.102	2.04103e-21	ENSMUSG00000037306
Qsox1	1.43202e-25	0.112126	0.325	0.208	2.87664e-21	ENSMUSG00000033684
Ifitm1	2.31673e-25	-0.189274	0.052	0.109	4.65385e-21	ENSMUSG00000025491
Prkcd	2.67817e-25	0.0850555	0.143	0.071	5.3799e-21	ENSMUSG00000021948
Scd1	2.83541e-25	0.118909	0.213	0.124	5.69576e-21	ENSMUSG00000037071
Serinc3	3.00881e-25	-0.11965	0.842	0.79	6.04409e-21	ENSMUSG00000017707
Tap1	6.56123e-25	0.092719	0.212	0.121	1.31802e-20	ENSMUSG00000037321
Selenop	6.68507e-25	-0.0787563	0.97	0.954	1.3429e-20	ENSMUSG00000064373
Atf5	6.95538e-25	0.110392	0.246	0.149	1.3972e-20	ENSMUSG00000038539
Efemp2	7.8534e-25	0.0959186	0.399	0.265	1.57759e-20	ENSMUSG00000024909
Mmd	9.99385e-25	0.0910971	0.193	0.108	2.00756e-20	ENSMUSG00000003948
Fn1	1.62178e-24	0.101419	0.154	0.08	3.25784e-20	ENSMUSG00000026193
Apod	1.85158e-24	-0.267243	0.274	0.349	3.71945e-20	ENSMUSG00000022548
Rpl39	1.98966e-24	-0.125749	0.805	0.758	3.99682e-20	ENSMUSG00000079641
Arf5	3.03895e-24	0.0991161	0.336	0.216	6.10465e-20	ENSMUSG00000020440
Furin	4.60783e-24	0.0833002	0.258	0.16	9.25621e-20	ENSMUSG00000030530
Gm13341	5.42816e-24	0.0891718	0.11	0.049	1.09041e-19	ENSMUSG00000083863
Hsp90ab1	5.59826e-24	-0.0856149	0.871	0.812	1.12458e-19	ENSMUSG00000023944
Adam9	6.57108e-24	0.10046	0.408	0.273	1.32e-19	ENSMUSG00000031555
Rtn4rl1	6.67198e-24	0.0988768	0.346	0.224	1.34027e-19	ENSMUSG00000045287
Serpina3n	7.27074e-24	-0.263909	0.458	0.506	1.46055e-19	ENSMUSG00000021091
Fzd4	7.40148e-24	0.0936785	0.179	0.099	1.48681e-19	ENSMUSG00000049791
Slc35b1	7.61434e-24	0.0871737	0.293	0.185	1.52957e-19	ENSMUSG00000020873
Derl2	8.12065e-24	0.0938916	0.28	0.174	1.63128e-19	ENSMUSG00000018442
Chrdl1	8.76331e-24	-0.0962335	0.841	0.807	1.76037e-19	ENSMUSG00000031283
Psmb2	9.83832e-24	0.0851227	0.359	0.235	1.97632e-19	ENSMUSG00000028837
S100b	1.06056e-23	0.109768	0.305	0.197	2.13044e-19	ENSMUSG00000033208
Trabd2b	1.07905e-23	0.0919675	0.188	0.106	2.16759e-19	ENSMUSG00000070867
Mcpt8	1.0827e-23	-0.0727576	0.001	0.022	2.17492e-19	ENSMUSG00000022157
Sdc3	1.13875e-23	0.094509	0.272	0.169	2.28753e-19	ENSMUSG00000025743
Mt1	1.28139e-23	0.105867	0.394	0.266	2.57405e-19	ENSMUSG00000031765
Txndc5	1.37111e-23	0.104189	0.407	0.274	2.75428e-19	ENSMUSG00000038991
Gpr176	2.22996e-23	0.0833002	0.209	0.121	4.47954e-19	ENSMUSG00000040133
Idh1	2.54156e-23	0.0997281	0.475	0.327	5.10549e-19	ENSMUSG00000025950
Esyt1	2.62085e-23	0.104864	0.384	0.257	5.26475e-19	ENSMUSG00000025366
Hist1h1c	3.68945e-23	0.102566	0.323	0.21	7.41137e-19	ENSMUSG00000036181
Sod2	3.9172e-23	0.0948571	0.353	0.231	7.86887e-19	ENSMUSG00000006818
Cap1	4.01399e-23	0.0814497	0.317	0.203	8.06331e-19	ENSMUSG00000028656
Kirrel	4.11597e-23	0.110065	0.56	0.398	8.26816e-19	ENSMUSG00000041734
Msrb1	4.84305e-23	0.0870174	0.143	0.074	9.72871e-19	ENSMUSG00000075705
Camk2n1	4.99571e-23	0.11754	0.576	0.41	1.00354e-18	ENSMUSG00000046447
Ndufs2	5.15389e-23	0.0810856	0.279	0.173	1.03531e-18	ENSMUSG00000013593
H1f0	5.28447e-23	0.10045	0.35	0.232	1.06154e-18	ENSMUSG00000096210
Irak2	7.24007e-23	0.0750332	0.121	0.058	1.45438e-18	ENSMUSG00000060477
Ttyh2	7.37276e-23	0.0808826	0.099	0.043	1.48104e-18	ENSMUSG00000034714
Pappa	7.99768e-23	-0.124481	0.802	0.75	1.60657e-18	ENSMUSG00000028370
Slco2a1	8.0023e-23	0.0681362	0.06	0.018	1.6075e-18	ENSMUSG00000032548
Smim3	9.30978e-23	0.091092	0.204	0.119	1.87015e-18	ENSMUSG00000038059
Atp6v1c2	9.84258e-23	0.111042	0.2	0.117	1.97718e-18	ENSMUSG00000020566
Ptgis	1.05801e-22	0.0807811	0.154	0.082	2.12534e-18	ENSMUSG00000017969
Serpina3f	1.09843e-22	-0.268298	0.206	0.273	2.20652e-18	ENSMUSG00000066363
Rps4x	1.12537e-22	-0.167397	0.732	0.7	2.26065e-18	ENSMUSG00000031320
Limch1	1.13559e-22	0.128507	0.487	0.344	2.28118e-18	ENSMUSG00000037736
Ldlrap1	1.33388e-22	0.0901112	0.221	0.132	2.67951e-18	ENSMUSG00000037295
Il17d	1.49195e-22	0.0844787	0.177	0.099	2.99703e-18	ENSMUSG00000050222
Mrpl27	1.55485e-22	0.0784241	0.18	0.102	3.12339e-18	ENSMUSG00000024414
Litaf	1.8176e-22	0.0842553	0.228	0.138	3.65119e-18	ENSMUSG00000022500
Cox7b	1.86097e-22	0.0823832	0.392	0.263	3.73831e-18	ENSMUSG00000031231
Acaa2	1.95772e-22	0.0702063	0.08	0.031	3.93268e-18	ENSMUSG00000036880
Lpl	1.98111e-22	-0.0914987	0.93	0.91	3.97965e-18	ENSMUSG00000015568
Palld	2.02845e-22	0.127551	0.562	0.404	4.07474e-18	ENSMUSG00000058056
Ppp2r1a	2.03995e-22	0.0949123	0.434	0.296	4.09786e-18	ENSMUSG00000007564
Gm4332	2.17718e-22	-0.236871	0.339	0.408	4.37351e-18	ENSMUSG00000106037
Epas1	2.34541e-22	-0.121674	0.81	0.754	4.71145e-18	ENSMUSG00000024140
Gm15459	2.78753e-22	-0.21883	0.426	0.47	5.5996e-18	ENSMUSG00000100801
Manf	2.80054e-22	0.0880135	0.419	0.284	5.62573e-18	ENSMUSG00000032575
Csad	3.42654e-22	0.0821131	0.207	0.122	6.88323e-18	ENSMUSG00000023044
Tmem140	3.54812e-22	0.0876281	0.273	0.173	7.12746e-18	ENSMUSG00000057137
Prkab2	4.63289e-22	0.100727	0.24	0.149	9.30654e-18	ENSMUSG00000038205
Cbx6	5.04109e-22	0.0988688	0.433	0.295	1.01265e-17	ENSMUSG00000089715
C1qtnf6	6.47182e-22	0.0781186	0.196	0.114	1.30006e-17	ENSMUSG00000022440
Spg21	7.66245e-22	0.0882713	0.198	0.115	1.53923e-17	ENSMUSG00000032388
Saraf	9.05179e-22	0.0906724	0.42	0.286	1.81832e-17	ENSMUSG00000031532
Dynlt1b	9.62366e-22	0.0563305	0.362	0.25	1.9332e-17	ENSMUSG00000096255
Bnip3	9.88053e-22	0.0865103	0.179	0.102	1.9848e-17	ENSMUSG00000078566
Vcam1	9.90012e-22	-0.0912812	0.912	0.872	1.98874e-17	ENSMUSG00000027962
Cat	1.07963e-21	0.0804482	0.26	0.163	2.16876e-17	ENSMUSG00000027187
Nnmt	1.11652e-21	0.0750142	0.224	0.136	2.24286e-17	ENSMUSG00000032271
Sh3bp4	1.18839e-21	0.0753096	0.117	0.057	2.38723e-17	ENSMUSG00000036206
Mc5r	1.23339e-21	0.10237	0.166	0.093	2.47763e-17	ENSMUSG00000007480
Tcn2	1.41898e-21	0.0875846	0.402	0.274	2.85044e-17	ENSMUSG00000020432
Cadm1	1.58023e-21	0.0757095	0.138	0.072	3.17437e-17	ENSMUSG00000032076
Mxd4	1.90584e-21	0.134084	0.783	0.616	3.82845e-17	ENSMUSG00000037235
2009-09-01	1.91195e-21	0.0712291	0.117	0.057	3.84073e-17	ENSMUSG00000059248
Irs1	2.12845e-21	0.0734738	0.351	0.232	4.27562e-17	ENSMUSG00000055980
5430419D17Rik	2.33888e-21	0.0661141	0.044	0.01	4.69833e-17	ENSMUSG00000006204
S100a16	2.72978e-21	0.0858038	0.382	0.259	5.48358e-17	ENSMUSG00000074457
Osbpl5	3.38388e-21	0.0908056	0.271	0.174	6.79754e-17	ENSMUSG00000037606
Pla2g15	3.61991e-21	0.0842665	0.113	0.055	7.27167e-17	ENSMUSG00000031903
Sp7	3.74489e-21	0.0755111	0.251	0.156	7.52273e-17	ENSMUSG00000060284
Chpf	3.96274e-21	0.0664493	0.15	0.081	7.96036e-17	ENSMUSG00000032997
Mpzl1	4.28461e-21	0.0986094	0.492	0.345	8.60692e-17	ENSMUSG00000026566
Hmgn3	4.71421e-21	0.0799419	0.425	0.291	9.4699e-17	ENSMUSG00000066456
Atp5l	4.79159e-21	0.0665535	0.608	0.463	9.62536e-17	ENSMUSG00000038717
St6galnac4	5.26588e-21	0.069669	0.195	0.114	1.05781e-16	ENSMUSG00000079442
Lgr4	5.6417e-21	0.0765236	0.129	0.067	1.1333e-16	ENSMUSG00000050199
Por	6.77763e-21	0.061227	0.12	0.059	1.36149e-16	ENSMUSG00000005514
Plbd2	7.98663e-21	0.0764815	0.254	0.16	1.60435e-16	ENSMUSG00000029598
Rps6ka3	9.34463e-21	0.0743262	0.225	0.137	1.87715e-16	ENSMUSG00000031309
Adipoq	9.85499e-21	0.107661	0.897	0.836	1.97967e-16	ENSMUSG00000022878
Scp2-ps2	1.05437e-20	0.0787626	0.438	0.314	2.11802e-16	ENSMUSG00000058492
Klf10	1.06534e-20	0.0958331	0.167	0.095	2.14006e-16	ENSMUSG00000037465
Galnt2	1.12431e-20	0.045369	0.293	0.19	2.25851e-16	ENSMUSG00000089704
Sh3bp5	1.15252e-20	0.0813313	0.361	0.243	2.31518e-16	ENSMUSG00000021892
Srp9	1.19491e-20	0.0770239	0.272	0.174	2.40034e-16	ENSMUSG00000026511
Shisa5	1.22275e-20	0.0793488	0.37	0.247	2.45625e-16	ENSMUSG00000025647
Slc26a7	1.26088e-20	-0.189898	0.583	0.588	2.53285e-16	ENSMUSG00000040569
Rps9	1.27384e-20	-0.123956	0.807	0.764	2.55889e-16	ENSMUSG00000006333
Hacd2	1.37971e-20	0.0783565	0.327	0.22	2.77156e-16	ENSMUSG00000035376
Foxn3	1.39224e-20	0.0885343	0.392	0.268	2.79674e-16	ENSMUSG00000033713
Ltbp1	1.49338e-20	-0.23927	0.382	0.421	2.9999e-16	ENSMUSG00000001870
Rab31	1.74056e-20	0.0612493	0.207	0.124	3.49644e-16	ENSMUSG00000056515
Plp2	1.75685e-20	0.0640006	0.245	0.156	3.52916e-16	ENSMUSG00000031146
Hacd1	1.81961e-20	0.0661089	0.262	0.168	3.65523e-16	ENSMUSG00000063275
Fndc1	2.2086e-20	0.0829788	0.105	0.05	4.43664e-16	ENSMUSG00000071984
Rpl41	2.30141e-20	-0.0973462	0.913	0.882	4.62307e-16	ENSMUSG00000093674
Dmpk	2.30836e-20	0.0746077	0.222	0.137	4.63704e-16	ENSMUSG00000030409
1500015O10Rik	2.39755e-20	0.0778347	0.204	0.122	4.81619e-16	ENSMUSG00000026051
Slco3a1	2.83002e-20	0.0827771	0.306	0.202	5.68495e-16	ENSMUSG00000025790
Ptprcap	2.93778e-20	0.0448282	0.246	0.156	5.90141e-16	ENSMUSG00000045826
Fgfrl1	3.08617e-20	0.0824745	0.31	0.204	6.1995e-16	ENSMUSG00000008090
Gm20388	3.19112e-20	0.0444005	0.292	0.189	6.41032e-16	ENSMUSG00000092329
Rpl5	3.45427e-20	-0.138088	0.776	0.733	6.93894e-16	ENSMUSG00000058558
Fhl2	3.46521e-20	0.123972	0.633	0.472	6.96091e-16	ENSMUSG00000008136
Ncor2	3.73259e-20	0.0694456	0.196	0.117	7.49802e-16	ENSMUSG00000029478
Srsf9	3.78585e-20	0.0819014	0.291	0.19	7.60501e-16	ENSMUSG00000029538
Lamtor4	3.85815e-20	0.0598136	0.213	0.13	7.75025e-16	ENSMUSG00000050552
Mro	3.95876e-20	0.0751794	0.14	0.075	7.95235e-16	ENSMUSG00000064036
Lama1	4.70179e-20	0.0581768	0.062	0.022	9.44495e-16	ENSMUSG00000032796
Fabp4	4.97402e-20	0.105837	0.078	0.033	9.9918e-16	ENSMUSG00000062515
Adgre5	5.39069e-20	0.0680686	0.103	0.049	1.08288e-15	ENSMUSG00000002885
Atp1a1	6.52025e-20	0.0829897	0.4	0.273	1.30979e-15	ENSMUSG00000033161
Igfbp4	6.95467e-20	-0.0597711	0.996	0.985	1.39705e-15	ENSMUSG00000017493
Rpl4	7.24052e-20	-0.172875	0.623	0.606	1.45447e-15	ENSMUSG00000032399
Snta1	8.938e-20	0.0732272	0.154	0.086	1.79547e-15	ENSMUSG00000027488
Rbfox2	8.95538e-20	0.0830771	0.307	0.204	1.79896e-15	ENSMUSG00000033565
Tmem37	1.09007e-19	0.0669768	0.105	0.051	2.18974e-15	ENSMUSG00000050777
Adipor2	1.41222e-19	0.0904179	0.391	0.271	2.83688e-15	ENSMUSG00000030168
Camkk2	1.42658e-19	0.0659083	0.211	0.13	2.86571e-15	ENSMUSG00000029471
Adarb1	1.43108e-19	0.0819871	0.181	0.107	2.87475e-15	ENSMUSG00000020262
Cnn2	1.4378e-19	0.135015	0.764	0.593	2.88826e-15	ENSMUSG00000004665
Tpp1	1.52545e-19	0.0676021	0.358	0.242	3.06433e-15	ENSMUSG00000030894
Dtnbp1	1.56435e-19	0.0563567	0.273	0.175	3.14246e-15	ENSMUSG00000057531
Prdx5	1.6174e-19	0.107329	0.645	0.476	3.24904e-15	ENSMUSG00000024953
Atn1	1.62457e-19	-0.207884	0.525	0.53	3.26344e-15	ENSMUSG00000004263
Mrps6	2.26844e-19	0.0820802	0.23	0.145	4.55684e-15	ENSMUSG00000039680
Prg2	2.28736e-19	-0.0576189	0	0.016	4.59485e-15	ENSMUSG00000027073
Tpcn1	3.07764e-19	0.0621141	0.139	0.076	6.18237e-15	ENSMUSG00000032741
Cavin2	3.12042e-19	0.0850018	0.08	0.035	6.26831e-15	ENSMUSG00000045954
Stk25	3.78274e-19	0.0649082	0.18	0.106	7.59877e-15	ENSMUSG00000026277
AC121965.1	4.30482e-19	0.0626456	0.375	0.256	8.64753e-15	ENSMUSG00000113902
Neo1	4.35905e-19	0.0715163	0.264	0.171	8.75646e-15	ENSMUSG00000032340
Gpi1	5.08483e-19	0.0692761	0.187	0.112	1.02144e-14	ENSMUSG00000036427
Ndufs5	6.14606e-19	0.0532718	0.41	0.285	1.23462e-14	ENSMUSG00000028648
Surf4	6.41309e-19	0.0728474	0.378	0.257	1.28826e-14	ENSMUSG00000014867
Fbxo32	6.93209e-19	0.0672188	0.105	0.052	1.39252e-14	ENSMUSG00000022358
Usmg5	7.36205e-19	0.0652484	0.368	0.255	1.47889e-14	ENSMUSG00000071528
Clptm1l	7.41076e-19	0.0660524	0.251	0.161	1.48867e-14	ENSMUSG00000021610
P2rx2	8.01122e-19	0.070372	0.184	0.11	1.60929e-14	ENSMUSG00000029503
Slc1a5	8.45542e-19	0.121245	0.729	0.561	1.69853e-14	ENSMUSG00000001918
Abcd2	9.41543e-19	0.057276	0.119	0.062	1.89137e-14	ENSMUSG00000055782
Ndufc1	1.08163e-18	0.0613689	0.263	0.17	2.17279e-14	ENSMUSG00000037152
G6pdx	1.12459e-18	0.0759564	0.249	0.16	2.25907e-14	ENSMUSG00000031400
Pigyl	1.25817e-18	0.0632852	0.185	0.111	2.5274e-14	ENSMUSG00000010607
Atp6v0a1	1.48064e-18	0.0775334	0.129	0.07	2.97431e-14	ENSMUSG00000019302
Zfp532	1.51581e-18	0.0699723	0.154	0.088	3.04497e-14	ENSMUSG00000042439
Echdc2	1.58323e-18	0.0765305	0.087	0.04	3.1804e-14	ENSMUSG00000028601
Rhbdf1	1.65334e-18	0.0684567	0.299	0.2	3.32122e-14	ENSMUSG00000020282
Pf4	1.68537e-18	-0.0917635	0.008	0.034	3.38558e-14	ENSMUSG00000029373
Tacc2	1.69681e-18	0.0643226	0.079	0.035	3.40855e-14	ENSMUSG00000030852
Pltp	1.72112e-18	0.0819782	0.359	0.248	3.4574e-14	ENSMUSG00000017754
Xdh	1.9161e-18	0.0923392	0.215	0.136	3.84906e-14	ENSMUSG00000024066
53885	1.98409e-18	0.0599777	0.214	0.133	3.98564e-14	NA
Rgs5	2.06859e-18	-0.145007	0.027	0.064	4.15539e-14	ENSMUSG00000026678
Wbp1l	2.11721e-18	0.0769388	0.194	0.12	4.25306e-14	ENSMUSG00000047731
Ppbp	2.13745e-18	-0.0989824	0.012	0.041	4.29371e-14	ENSMUSG00000029372
Sec61a1	2.21102e-18	0.0568452	0.255	0.165	4.4415e-14	ENSMUSG00000030082
Map2k1	2.21658e-18	0.0583711	0.275	0.179	4.45266e-14	ENSMUSG00000004936
Coro1b	2.3141e-18	0.0373029	0.247	0.159	4.64856e-14	ENSMUSG00000024835
Rpl23	2.33736e-18	-0.122133	0.814	0.761	4.69528e-14	ENSMUSG00000071415
Plac9a	2.62116e-18	-0.133874	0.762	0.745	5.26539e-14	ENSMUSG00000095304
Cdh11	2.70204e-18	-0.045992	0.958	0.915	5.42787e-14	ENSMUSG00000031673
Timm23	2.9994e-18	0.0518472	0.209	0.129	6.02519e-14	ENSMUSG00000013701
Pdlim7	3.19699e-18	0.0673578	0.099	0.049	6.42211e-14	ENSMUSG00000021493
Gm15500	3.23784e-18	-0.140524	0.74	0.705	6.50416e-14	ENSMUSG00000086583
Rab3d	3.29578e-18	0.0746161	0.108	0.055	6.62057e-14	ENSMUSG00000019066
Itga1	3.3855e-18	-0.192434	0.553	0.55	6.80078e-14	ENSMUSG00000042284
Amotl2	3.39384e-18	0.0967596	0.549	0.401	6.81754e-14	ENSMUSG00000032531
Ddx5	3.46156e-18	-0.109492	0.793	0.73	6.95357e-14	ENSMUSG00000020719
Mmp23	3.46373e-18	0.0669871	0.24	0.154	6.95795e-14	ENSMUSG00000029061
Suclg1	3.49764e-18	0.0409517	0.252	0.161	7.02606e-14	ENSMUSG00000052738
Clec11a	3.59608e-18	0.0977362	0.528	0.384	7.2238e-14	ENSMUSG00000004473
Slc8b1	3.59927e-18	0.0617525	0.074	0.031	7.23022e-14	ENSMUSG00000032754
Dok1	3.74853e-18	0.0538172	0.099	0.048	7.53004e-14	ENSMUSG00000068335
Mtch1	3.76859e-18	0.0813732	0.5	0.356	7.57034e-14	ENSMUSG00000024012
Slc6a9	3.94161e-18	0.0641846	0.091	0.043	7.9179e-14	ENSMUSG00000028542
Eva1b	4.889e-18	0.0771155	0.22	0.141	9.82103e-14	ENSMUSG00000050212
Tsen34	4.90302e-18	0.0563906	0.236	0.153	9.84918e-14	ENSMUSG00000035585
Ndst1	5.64792e-18	0.0704904	0.33	0.224	1.13455e-13	ENSMUSG00000054008
Rerg	5.69563e-18	0.0527598	0.055	0.019	1.14414e-13	ENSMUSG00000030222
Ilk	6.01641e-18	0.0579997	0.225	0.142	1.20858e-13	ENSMUSG00000030890
Plod1	6.06827e-18	0.055803	0.163	0.096	1.21899e-13	ENSMUSG00000019055
Cpne2	6.36012e-18	0.0713856	0.138	0.078	1.27762e-13	ENSMUSG00000034361
Tpst2	6.62176e-18	0.0633167	0.176	0.105	1.33018e-13	ENSMUSG00000029344
Serp1	6.98928e-18	0.0585646	0.29	0.192	1.40401e-13	ENSMUSG00000027808
C2	7.30349e-18	0.121367	0.593	0.456	1.46712e-13	ENSMUSG00000024371
Plod3	8.52084e-18	0.0754355	0.271	0.181	1.71167e-13	ENSMUSG00000004846
Gm2000	8.75645e-18	-0.218043	0.35	0.402	1.759e-13	ENSMUSG00000078193
Fuca1	9.20677e-18	0.07341	0.384	0.268	1.84946e-13	ENSMUSG00000028673
Dnajb11	9.72984e-18	0.0739439	0.249	0.163	1.95453e-13	ENSMUSG00000004460
Zfand3	1.0034e-17	0.0632835	0.259	0.169	2.01562e-13	ENSMUSG00000044477
Ndufb9	1.05597e-17	0.0611598	0.235	0.151	2.12123e-13	ENSMUSG00000022354
Slc12a4	1.20375e-17	0.0646906	0.16	0.094	2.41809e-13	ENSMUSG00000017765
Ddr2	1.25492e-17	0.0968357	0.552	0.407	2.52088e-13	ENSMUSG00000026674
Ctsd	1.26804e-17	0.064194	0.258	0.17	2.54724e-13	ENSMUSG00000007891
Wbp2	1.30207e-17	0.0640662	0.259	0.169	2.6156e-13	ENSMUSG00000034341
Extl3	1.41587e-17	0.0681266	0.258	0.168	2.8442e-13	ENSMUSG00000021978
Itga11	1.45252e-17	0.0714019	0.202	0.126	2.91783e-13	ENSMUSG00000032243
Col9a1	1.49656e-17	0.0706055	0.105	0.054	3.00629e-13	ENSMUSG00000026147
Washc5	1.51746e-17	0.0700406	0.139	0.079	3.04827e-13	ENSMUSG00000022350
Unc5b	1.62842e-17	0.0694618	0.224	0.144	3.27117e-13	ENSMUSG00000020099
Pcsk5	1.65599e-17	0.0714207	0.167	0.1	3.32654e-13	ENSMUSG00000024713
Erp29	1.8309e-17	0.0580752	0.316	0.216	3.67791e-13	ENSMUSG00000029616
Hadh	1.85993e-17	0.0679149	0.341	0.234	3.73623e-13	ENSMUSG00000027984
Nedd8	1.90994e-17	0.0669711	0.41	0.285	3.83669e-13	ENSMUSG00000010376
Scarf2	1.95339e-17	0.0644136	0.225	0.145	3.92398e-13	ENSMUSG00000012017
H2-T23	2.28542e-17	0.0726168	0.528	0.398	4.59096e-13	ENSMUSG00000067212
2005-03-01	2.29641e-17	0.0665057	0.187	0.115	4.61302e-13	ENSMUSG00000023307
Spata13	2.3401e-17	0.061227	0.11	0.057	4.70079e-13	ENSMUSG00000021990
Nptn	2.36065e-17	-0.123495	0.747	0.693	4.74208e-13	ENSMUSG00000032336
Rapgef3	2.95326e-17	0.0481715	0.091	0.044	5.93252e-13	ENSMUSG00000022469
Sulf1	3.12827e-17	-0.232942	0.324	0.366	6.28407e-13	ENSMUSG00000016918
Pdlim4	3.38872e-17	0.067741	0.177	0.108	6.80725e-13	ENSMUSG00000020388
Tpm1	3.39908e-17	-0.0493665	0.965	0.936	6.82807e-13	ENSMUSG00000032366
Fgfr3	3.96139e-17	0.0697601	0.152	0.09	7.95763e-13	ENSMUSG00000054252
Apobec1	4.28584e-17	0.0569866	0.254	0.166	8.60939e-13	ENSMUSG00000040613
Sdcbp	4.53603e-17	0.0667627	0.383	0.266	9.11197e-13	ENSMUSG00000028249
Ak2	4.95804e-17	0.062201	0.22	0.142	9.95971e-13	ENSMUSG00000028792
Keap1	4.99188e-17	0.0688735	0.154	0.091	1.00277e-12	ENSMUSG00000003308
Pth1r	5.15284e-17	0.0704677	0.32	0.221	1.0351e-12	ENSMUSG00000032492
Gm20427	5.19023e-17	0.0542803	0.47	0.341	1.04261e-12	ENSMUSG00000092595
Mpc2	5.67005e-17	0.0655467	0.386	0.272	1.139e-12	ENSMUSG00000026568
H3f3c	5.91138e-17	-0.0619774	0.035	0.073	1.18748e-12	ENSMUSG00000082029
Psmb5	6.39687e-17	0.0501191	0.209	0.134	1.285e-12	ENSMUSG00000022193
Cyb5b	6.87549e-17	0.0504491	0.222	0.142	1.38115e-12	ENSMUSG00000031924
Psmd1	6.99441e-17	0.0530867	0.299	0.203	1.40504e-12	ENSMUSG00000026229
Galnt10	7.95886e-17	0.057592	0.091	0.044	1.59878e-12	ENSMUSG00000020520
Rpn1	8.447e-17	0.0631045	0.372	0.26	1.69683e-12	ENSMUSG00000030062
Eif1	8.59845e-17	-0.123717	0.789	0.736	1.72726e-12	ENSMUSG00000035530
Ccl9	9.07271e-17	0.0844527	0.173	0.107	1.82253e-12	ENSMUSG00000019122
4930533O14Rik	9.38656e-17	0.0633335	0.112	0.06	1.88557e-12	ENSMUSG00000063904
Serpinf1	9.89128e-17	0.0614485	0.301	0.205	1.98696e-12	ENSMUSG00000000753
Wdr26	1.06536e-16	0.0621004	0.292	0.197	2.1401e-12	ENSMUSG00000038733
Ndufs1	1.07995e-16	0.0544935	0.185	0.115	2.1694e-12	ENSMUSG00000025968
Pitpna	1.17191e-16	0.0595258	0.265	0.176	2.35412e-12	ENSMUSG00000017781
H2afy	1.28311e-16	0.0699102	0.335	0.232	2.57752e-12	ENSMUSG00000015937
Mki67	1.36583e-16	-0.0747373	0.006	0.028	2.74367e-12	ENSMUSG00000031004
Ifi27	1.39973e-16	0.0711108	0.493	0.355	2.81178e-12	ENSMUSG00000064215
Gak	1.41168e-16	0.0661754	0.126	0.071	2.83578e-12	ENSMUSG00000062234
Notch2	1.48389e-16	0.0679492	0.285	0.193	2.98084e-12	ENSMUSG00000027878
Pla2g16	1.49441e-16	0.0668267	0.166	0.101	3.00198e-12	ENSMUSG00000060675
Shisa4	1.53121e-16	0.067572	0.17	0.104	3.0759e-12	ENSMUSG00000041889
Zfp503	1.53564e-16	0.0700858	0.162	0.098	3.0848e-12	ENSMUSG00000039081
Nkd2	1.55018e-16	0.0630214	0.135	0.077	3.114e-12	ENSMUSG00000021567
Nrcam	1.59059e-16	0.0478078	0.065	0.027	3.19517e-12	ENSMUSG00000020598
AI464131	1.69021e-16	0.0722751	0.155	0.092	3.39528e-12	ENSMUSG00000046312
Epn1	1.71333e-16	0.0489802	0.215	0.138	3.44173e-12	ENSMUSG00000035203
Sh3pxd2a	1.73031e-16	0.0672652	0.287	0.194	3.47584e-12	ENSMUSG00000053617
Smdt1	1.77254e-16	0.055458	0.176	0.108	3.56069e-12	ENSMUSG00000022452
Rps26	1.80411e-16	-0.10497	0.831	0.783	3.6241e-12	ENSMUSG00000025362
Fat1	1.84698e-16	0.0790886	0.415	0.297	3.71022e-12	ENSMUSG00000070047
Gm9780	1.93823e-16	-0.12876	0.758	0.738	3.89352e-12	ENSMUSG00000094800
Hdac3	2.12106e-16	0.0604772	0.152	0.09	4.26078e-12	ENSMUSG00000024454
Mad2l2	2.19246e-16	0.0547103	0.116	0.063	4.40422e-12	ENSMUSG00000029003
Loxl3	2.36625e-16	0.0515112	0.285	0.192	4.75332e-12	ENSMUSG00000000693
Larp6	2.49387e-16	0.0726536	0.108	0.058	5.00968e-12	ENSMUSG00000034839
Slc25a17	2.84927e-16	0.0611288	0.278	0.188	5.72361e-12	ENSMUSG00000022404
Entpd4	2.93636e-16	0.0685052	0.19	0.12	5.89856e-12	ENSMUSG00000095463
Adgra2	2.96175e-16	0.072339	0.182	0.114	5.94956e-12	ENSMUSG00000031486
Polr2g	3.05751e-16	0.0575131	0.202	0.129	6.14193e-12	ENSMUSG00000071662
Cmtm6	3.52499e-16	0.0574119	0.277	0.187	7.081e-12	ENSMUSG00000032434
Fam20a	4.10017e-16	0.0664432	0.235	0.156	8.23641e-12	ENSMUSG00000020614
Cox5a	4.46132e-16	0.0502948	0.193	0.122	8.9619e-12	ENSMUSG00000000088
Limd2	4.46421e-16	0.0557533	0.133	0.076	8.96771e-12	ENSMUSG00000040699
Gps1	4.5145e-16	0.066413	0.204	0.132	9.06872e-12	ENSMUSG00000025156
Kif1c	4.52808e-16	0.0621145	0.221	0.144	9.09602e-12	ENSMUSG00000020821
Afdn	4.68572e-16	0.0542622	0.113	0.062	9.41268e-12	ENSMUSG00000068036
Slc23a2	4.79969e-16	0.0569251	0.1	0.052	9.64162e-12	ENSMUSG00000027340
Uqcrq	5.86781e-16	0.0676641	0.326	0.226	1.17873e-11	ENSMUSG00000044894
H2-Q7	6.14487e-16	0.10368	0.707	0.54	1.23438e-11	ENSMUSG00000060550
Ttc28	6.25958e-16	0.0785653	0.262	0.176	1.25742e-11	ENSMUSG00000033209
Ldb2	6.48715e-16	-0.115325	0.038	0.075	1.30314e-11	ENSMUSG00000039706
Adgrl1	6.84684e-16	0.0526621	0.22	0.143	1.37539e-11	ENSMUSG00000013033
Gm2a	7.11646e-16	0.0761241	0.429	0.309	1.42955e-11	ENSMUSG00000000594
Slc39a7	7.17207e-16	0.049815	0.413	0.298	1.44073e-11	ENSMUSG00000024327
Gpr153	7.28825e-16	0.0560031	0.317	0.219	1.46406e-11	ENSMUSG00000042804
Rpl36al	7.43388e-16	0.0323079	0.375	0.268	1.49332e-11	ENSMUSG00000049751
Zyx	7.60269e-16	0.0599161	0.174	0.108	1.52723e-11	ENSMUSG00000029860
Acox1	7.69159e-16	0.0598382	0.142	0.084	1.54509e-11	ENSMUSG00000020777
Rbm39	8.07074e-16	-0.18054	0.551	0.545	1.62125e-11	ENSMUSG00000027620
Ctsa	8.31821e-16	0.0588322	0.418	0.298	1.67096e-11	ENSMUSG00000017760
Pfdn1	8.34013e-16	0.0449063	0.217	0.141	1.67537e-11	ENSMUSG00000024346
Sptan1	9.25725e-16	0.0656582	0.386	0.274	1.8596e-11	ENSMUSG00000057738
Elmo2	9.32172e-16	0.0477035	0.262	0.175	1.87255e-11	ENSMUSG00000017670
Sidt2	9.53818e-16	0.062939	0.265	0.179	1.91603e-11	ENSMUSG00000034908
Ubald1	1.05551e-15	0.0526086	0.19	0.12	2.12031e-11	ENSMUSG00000039568
Arrb1	1.09631e-15	0.0676256	0.145	0.086	2.20226e-11	ENSMUSG00000018909
Gmppa	1.11721e-15	0.0520472	0.182	0.114	2.24426e-11	ENSMUSG00000033021
Scamp4	1.15896e-15	0.0294251	0.156	0.094	2.32813e-11	ENSMUSG00000113949
Cavin1	1.1663e-15	0.0851832	0.559	0.417	2.34286e-11	ENSMUSG00000004044
Dusp23	1.22577e-15	0.0677082	0.132	0.076	2.46232e-11	ENSMUSG00000026544
Plxna1	1.28033e-15	0.050949	0.219	0.143	2.57193e-11	ENSMUSG00000030084
Mgat1	1.33755e-15	0.047217	0.229	0.15	2.68687e-11	ENSMUSG00000020346
Adat3.1	1.35368e-15	0.0293589	0.159	0.096	2.71927e-11	NA
Smad6	1.44953e-15	0.0490819	0.216	0.141	2.91182e-11	ENSMUSG00000036867
Atp6v0e	1.52669e-15	0.0634669	0.444	0.318	3.06681e-11	ENSMUSG00000015575
Dynlt1a	1.57697e-15	0.0320546	0.344	0.249	3.16781e-11	ENSMUSG00000092074
Grcc10	1.64267e-15	0.0377077	0.242	0.163	3.29979e-11	ENSMUSG00000072772
Heg1	1.70762e-15	0.0552537	0.208	0.135	3.43027e-11	ENSMUSG00000075254
Dda1	1.70956e-15	0.0661557	0.199	0.129	3.43417e-11	ENSMUSG00000074247
Fam129b	1.7998e-15	0.0557512	0.133	0.078	3.61544e-11	ENSMUSG00000026796
Myadm	1.87095e-15	0.0947718	0.664	0.499	3.75837e-11	ENSMUSG00000068566
Daam2	1.90307e-15	0.0473909	0.215	0.139	3.82289e-11	ENSMUSG00000040260
Rps12-ps3	1.9534e-15	-0.138198	0.76	0.76	3.92399e-11	ENSMUSG00000067038
Chst2	1.98105e-15	0.0535712	0.344	0.239	3.97953e-11	ENSMUSG00000033350
Tmem55b	2.0021e-15	0.0593218	0.147	0.088	4.02182e-11	ENSMUSG00000035953
Npdc1	2.15224e-15	0.0628675	0.18	0.113	4.32343e-11	ENSMUSG00000015094
Slc25a1	2.27338e-15	0.0473037	0.177	0.111	4.56678e-11	ENSMUSG00000003528
Tubb4b	2.49499e-15	0.0541661	0.146	0.088	5.01194e-11	ENSMUSG00000036752
Iah1	2.61524e-15	0.0507266	0.18	0.113	5.25349e-11	ENSMUSG00000062054
Mtss1	2.70353e-15	0.0635805	0.139	0.083	5.43085e-11	ENSMUSG00000022353
Cs	2.97175e-15	0.049815	0.219	0.143	5.96965e-11	ENSMUSG00000005683
Abhd17c	3.01502e-15	0.0613536	0.098	0.052	6.05658e-11	ENSMUSG00000038459
H2afj	3.02625e-15	0.0579177	0.225	0.149	6.07912e-11	ENSMUSG00000060032
Ndufb6	3.12729e-15	0.0393684	0.223	0.146	6.28211e-11	ENSMUSG00000071014
Srpx2	3.25757e-15	0.0588976	0.342	0.238	6.5438e-11	ENSMUSG00000031253
Bax	3.53004e-15	0.0573996	0.224	0.149	7.09114e-11	ENSMUSG00000003873
Timm10b	3.9691e-15	0.0409243	0.169	0.106	7.97312e-11	ENSMUSG00000089847
Mrpl43	4.04268e-15	0.0616067	0.17	0.107	8.12093e-11	ENSMUSG00000025208
Ubl5	4.2211e-15	0.0542954	0.449	0.322	8.47934e-11	ENSMUSG00000084786
Tmed4	4.25437e-15	0.0546785	0.12	0.069	8.54618e-11	ENSMUSG00000004394
Adam17	4.33656e-15	0.0511125	0.252	0.17	8.71128e-11	ENSMUSG00000052593
Dap	4.4978e-15	0.0519327	0.391	0.279	9.03518e-11	ENSMUSG00000039168
Naxd	4.54824e-15	0.0595004	0.284	0.197	9.13651e-11	ENSMUSG00000031505
Stt3b	4.78896e-15	0.0659113	0.283	0.195	9.62007e-11	ENSMUSG00000032437
Emp3	4.83335e-15	0.0681426	0.442	0.321	9.70924e-11	ENSMUSG00000040212
Trappc10	4.95686e-15	0.0713962	0.173	0.11	9.95734e-11	ENSMUSG00000000374
Pgls	5.19789e-15	0.050936	0.203	0.131	1.04415e-10	ENSMUSG00000031807
Vasn	5.30647e-15	0.051067	0.214	0.141	1.06596e-10	ENSMUSG00000039646
Cdk6	5.43871e-15	0.0551139	0.142	0.085	1.09253e-10	ENSMUSG00000040274
Vim	5.46905e-15	-0.0801154	0.861	0.793	1.09862e-10	ENSMUSG00000026728
51669	5.48064e-15	0.04868	0.284	0.194	1.10095e-10	NA
Aurkaip1	5.85107e-15	0.0587828	0.182	0.116	1.17536e-10	ENSMUSG00000065990
Wsb2	6.50992e-15	0.0493573	0.155	0.095	1.30771e-10	ENSMUSG00000029364
Slc39a1	6.55404e-15	0.0764568	0.579	0.427	1.31658e-10	ENSMUSG00000052310
Imp3	7.4683e-15	0.0543473	0.348	0.245	1.50023e-10	ENSMUSG00000032288
Hexa	7.92266e-15	0.0551515	0.315	0.22	1.5915e-10	ENSMUSG00000025232
Ltbr	8.04546e-15	0.0400715	0.356	0.251	1.61617e-10	ENSMUSG00000030339
Rps12l1	8.05894e-15	-0.142905	0.672	0.694	1.61888e-10	ENSMUSG00000078087
Irf2bp2	8.39113e-15	0.0753403	0.502	0.368	1.68561e-10	ENSMUSG00000051495
Sh3gl1	9.29665e-15	0.0561627	0.255	0.174	1.86751e-10	ENSMUSG00000003200
Lsm6	9.56886e-15	0.0441233	0.195	0.126	1.92219e-10	ENSMUSG00000031683
Dlx6	9.7049e-15	0.0603991	0.129	0.076	1.94952e-10	ENSMUSG00000029754
Capns1	1.02808e-14	0.053437	0.452	0.324	2.06522e-10	ENSMUSG00000001794
Mtch2	1.06389e-14	0.0419601	0.229	0.151	2.13713e-10	ENSMUSG00000027282
Lamp1	1.07564e-14	-0.102666	0.75	0.685	2.16075e-10	ENSMUSG00000031447
Sorbs3	1.0871e-14	0.0454653	0.202	0.131	2.18376e-10	ENSMUSG00000022091
Rnh1	1.10579e-14	0.0412394	0.117	0.066	2.2213e-10	ENSMUSG00000038650
Rab34	1.11212e-14	0.0462145	0.16	0.1	2.23402e-10	ENSMUSG00000002059
Jup	1.13196e-14	0.0606414	0.199	0.129	2.27388e-10	ENSMUSG00000001552
Ech1	1.29112e-14	0.0340965	0.213	0.14	2.5936e-10	ENSMUSG00000053898
Irx5	1.30199e-14	0.0596489	0.124	0.072	2.61544e-10	ENSMUSG00000031737
Parp3	1.32661e-14	0.0549764	0.269	0.185	2.6649e-10	ENSMUSG00000023249
Ednra	1.36932e-14	-0.203795	0.161	0.21	2.75069e-10	ENSMUSG00000031616
Rps3a1	1.38512e-14	-0.124827	0.775	0.724	2.78242e-10	ENSMUSG00000028081
Slc9a6	1.41399e-14	0.0580868	0.13	0.077	2.84042e-10	ENSMUSG00000060681
Arf3	1.4646e-14	0.0593124	0.222	0.148	2.9421e-10	ENSMUSG00000051853
54300	1.47319e-14	0.0576892	0.183	0.118	2.95934e-10	NA
Pold4	1.51509e-14	0.0542422	0.121	0.07	3.04352e-10	ENSMUSG00000024854
Nisch	1.54413e-14	0.0534736	0.275	0.19	3.10185e-10	ENSMUSG00000021910
Cycs	1.55155e-14	0.0320647	0.208	0.137	3.11676e-10	ENSMUSG00000063694
Ube2a	1.57666e-14	0.0490145	0.174	0.11	3.16719e-10	ENSMUSG00000016308
Hmox2	1.68385e-14	0.0498474	0.176	0.111	3.38252e-10	ENSMUSG00000004070
Rras	1.69094e-14	0.0688857	0.479	0.347	3.39676e-10	ENSMUSG00000038387
Ehd1	1.70481e-14	0.0459611	0.083	0.042	3.42462e-10	ENSMUSG00000024772
Zc2hc1a	1.74192e-14	0.0598755	0.132	0.079	3.49916e-10	ENSMUSG00000043542
Scara3	1.79848e-14	-0.15387	0.59	0.572	3.61279e-10	ENSMUSG00000034463
Lman2	1.91573e-14	0.0561991	0.254	0.175	3.84832e-10	ENSMUSG00000021484
Pik3r2	1.91725e-14	0.0380259	0.118	0.067	3.85137e-10	ENSMUSG00000031834
Ogn	1.92717e-14	-0.0974664	0.773	0.706	3.87129e-10	ENSMUSG00000021390
Snhg3	1.92833e-14	0.0614348	0.163	0.103	3.87364e-10	ENSMUSG00000085241
Unc50	2.17033e-14	0.0426196	0.266	0.182	4.35975e-10	ENSMUSG00000026111
Cdk2ap2	2.27297e-14	0.04891	0.164	0.103	4.56594e-10	ENSMUSG00000024856
Ykt6	2.32331e-14	0.0386096	0.145	0.088	4.66706e-10	ENSMUSG00000002741
Mgat4b	2.32734e-14	0.050632	0.141	0.086	4.67516e-10	ENSMUSG00000036620
Rcc2	2.59858e-14	0.0480261	0.132	0.078	5.22004e-10	ENSMUSG00000040945
Adprh	2.67652e-14	0.044966	0.236	0.159	5.37659e-10	ENSMUSG00000002844
Uqcr11	2.87157e-14	0.046525	0.28	0.193	5.76841e-10	ENSMUSG00000020163
Ppp3r1	2.95628e-14	0.0425819	0.267	0.183	5.93859e-10	ENSMUSG00000033953
Rgcc	3.21851e-14	0.0709087	0.471	0.347	6.46534e-10	ENSMUSG00000022018
Psmb6	3.22035e-14	0.0570789	0.187	0.122	6.46904e-10	ENSMUSG00000018286
Svep1	3.32064e-14	0.0540489	0.388	0.28	6.67051e-10	ENSMUSG00000028369
Tor3a	3.46366e-14	0.0408753	0.173	0.109	6.95781e-10	ENSMUSG00000060519
Rps5	3.62162e-14	-0.112043	0.761	0.7	7.27512e-10	ENSMUSG00000012848
Npnt	3.66072e-14	0.0441611	0.07	0.033	7.35365e-10	ENSMUSG00000040998
Lamc1	3.70699e-14	0.0919202	0.696	0.528	7.44659e-10	ENSMUSG00000026478
Pitpnm2	3.90527e-14	0.0357227	0.045	0.016	7.8449e-10	ENSMUSG00000029406
Sptlc1	4.08678e-14	0.0567656	0.177	0.114	8.20953e-10	ENSMUSG00000021468
Atp6v0b	4.24452e-14	0.0445282	0.13	0.077	8.52639e-10	ENSMUSG00000033379
Atp6v1a	4.25031e-14	0.0375569	0.285	0.198	8.53801e-10	ENSMUSG00000052459
Sh3pxd2b	4.31365e-14	0.0413665	0.164	0.103	8.66526e-10	ENSMUSG00000040711
Arfip2	4.95505e-14	0.038748	0.152	0.094	9.9537e-10	ENSMUSG00000030881
Rpl27	5.09734e-14	0.0295253	0.442	0.335	1.02395e-09	ENSMUSG00000063316
Myo18a	5.15568e-14	0.0449799	0.26	0.178	1.03567e-09	ENSMUSG00000000631
Cercam	5.16414e-14	0.0609842	0.09	0.048	1.03737e-09	ENSMUSG00000039787
Uqcrfs1	5.22745e-14	0.0462317	0.196	0.129	1.05009e-09	ENSMUSG00000038462
Ar	5.37148e-14	0.0793237	0.574	0.43	1.07902e-09	ENSMUSG00000046532
Apoe	5.37309e-14	-0.0528667	0.926	0.878	1.07935e-09	ENSMUSG00000002985
Tubb6	5.4523e-14	0.036655	0.051	0.021	1.09526e-09	ENSMUSG00000001473
Tmbim4	5.50252e-14	0.050225	0.186	0.121	1.10535e-09	ENSMUSG00000020225
Amotl1	5.58453e-14	0.0634772	0.438	0.323	1.12182e-09	ENSMUSG00000013076
Creld2	5.78442e-14	0.052887	0.183	0.119	1.16197e-09	ENSMUSG00000023272
Nuak1	5.8511e-14	0.0448626	0.223	0.15	1.17537e-09	ENSMUSG00000020032
Galk2	5.86702e-14	0.0534759	0.1	0.055	1.17857e-09	ENSMUSG00000027207
Acaa1a	6.09508e-14	0.047401	0.135	0.082	1.22438e-09	ENSMUSG00000036138
Ssh2	6.14836e-14	0.0589425	0.251	0.173	1.23508e-09	ENSMUSG00000037926
Atp6v1b2	6.18297e-14	0.0593173	0.245	0.168	1.24204e-09	ENSMUSG00000006273
Cdc42ep1	6.4353e-14	0.0758761	0.447	0.329	1.29272e-09	ENSMUSG00000049521
Rgs3	6.47552e-14	0.0477432	0.288	0.201	1.3008e-09	ENSMUSG00000059810
Pgf	6.52344e-14	0.0593054	0.172	0.111	1.31043e-09	ENSMUSG00000004791
Cd24a	6.55101e-14	-0.0819555	0.012	0.036	1.31597e-09	ENSMUSG00000047139
Uqcr10	6.78341e-14	0.0407247	0.203	0.134	1.36265e-09	ENSMUSG00000059534
Ctse	6.95674e-14	-0.0418375	0.001	0.013	1.39747e-09	ENSMUSG00000004552
Etv5	6.96056e-14	0.0580544	0.107	0.061	1.39824e-09	ENSMUSG00000013089
Lhfpl2	7.17941e-14	0.0541497	0.155	0.097	1.4422e-09	ENSMUSG00000045312
Apip	7.56985e-14	0.0482183	0.188	0.123	1.52063e-09	ENSMUSG00000010911
Pafah2	7.57736e-14	0.053194	0.132	0.079	1.52214e-09	ENSMUSG00000037366
Hnrnpdl	7.87872e-14	0.0452572	0.245	0.168	1.58268e-09	ENSMUSG00000029328
Tmem9	8.19786e-14	0.05034	0.193	0.127	1.64679e-09	ENSMUSG00000026411
Smap1	8.38843e-14	0.0423015	0.275	0.189	1.68507e-09	ENSMUSG00000026155
Slc25a20	8.50727e-14	0.0562144	0.1	0.056	1.70894e-09	ENSMUSG00000032602
Pkm	9.05169e-14	0.0403251	0.227	0.153	1.8183e-09	ENSMUSG00000032294
Clptm1	9.19038e-14	0.0420125	0.216	0.145	1.84616e-09	ENSMUSG00000002981
Tap2	9.22557e-14	0.0436612	0.269	0.187	1.85323e-09	ENSMUSG00000024339
Hsd17b7	9.35038e-14	0.0483498	0.141	0.086	1.87831e-09	ENSMUSG00000026675
Ankrd29	9.38444e-14	-0.0963919	0.036	0.07	1.88515e-09	ENSMUSG00000057766
Mapkapk2	9.62201e-14	0.0482256	0.225	0.151	1.93287e-09	ENSMUSG00000016528
Phlda1	1.00384e-13	0.0599943	0.122	0.073	2.01652e-09	ENSMUSG00000020205
Gm8797	1.00775e-13	-0.187519	0.368	0.424	2.02437e-09	ENSMUSG00000103034
Il6ra	1.07646e-13	0.0387407	0.032	0.009	2.16239e-09	ENSMUSG00000027947
Htra2	1.1288e-13	0.0526166	0.135	0.082	2.26754e-09	ENSMUSG00000068329
Clta	1.18444e-13	0.0385927	0.351	0.249	2.3793e-09	ENSMUSG00000028478
Adamtsl1	1.22314e-13	0.045106	0.053	0.022	2.45704e-09	ENSMUSG00000066113
Ctbp1	1.25323e-13	0.0413819	0.255	0.174	2.51748e-09	ENSMUSG00000037373
Ppp1r3c	1.27195e-13	0.0391769	0.033	0.01	2.5551e-09	ENSMUSG00000067279
Igf2r	1.2824e-13	0.0581396	0.208	0.14	2.57609e-09	ENSMUSG00000023830
Vmp1	1.41251e-13	0.0589406	0.402	0.296	2.83744e-09	ENSMUSG00000018171
Atp6v1g1	1.42099e-13	0.0459378	0.334	0.237	2.85449e-09	ENSMUSG00000039105
Itgb1	1.42168e-13	-0.0527432	0.897	0.83	2.85586e-09	ENSMUSG00000025809
Arhgdia	1.42738e-13	0.0878587	0.591	0.437	2.86731e-09	ENSMUSG00000025132
Hmgn5	1.45431e-13	0.0588168	0.138	0.086	2.92143e-09	ENSMUSG00000031245
Etfdh	1.50731e-13	0.0484826	0.162	0.103	3.02789e-09	ENSMUSG00000027809
Nrp1	1.52357e-13	-0.16353	0.58	0.555	3.06054e-09	ENSMUSG00000025810
Adra1b	1.54646e-13	0.0347611	0.027	0.006	3.10654e-09	ENSMUSG00000050541
Dse	1.57658e-13	0.0722506	0.556	0.411	3.16703e-09	ENSMUSG00000039497
Rpp21	1.58483e-13	0.0536411	0.155	0.098	3.18361e-09	ENSMUSG00000024446
P2rx4	1.58644e-13	0.0558608	0.23	0.157	3.18683e-09	ENSMUSG00000029470
Dgat2	1.5921e-13	0.0268193	0.022	0.004	3.19821e-09	ENSMUSG00000030747
Napa	1.68468e-13	0.0330263	0.314	0.221	3.38419e-09	ENSMUSG00000006024
Epha2	1.80937e-13	0.0394034	0.039	0.014	3.63465e-09	ENSMUSG00000006445
Eprs	1.81049e-13	0.0372826	0.312	0.22	3.63691e-09	ENSMUSG00000026615
Itga3	1.83908e-13	0.0460175	0.049	0.02	3.69435e-09	ENSMUSG00000001507
Nme1	1.84474e-13	0.0450513	0.231	0.157	3.70571e-09	ENSMUSG00000037601
Sntb1	1.86095e-13	0.0575668	0.079	0.041	3.73828e-09	ENSMUSG00000060429
Rps20	1.89531e-13	-0.0951585	0.862	0.813	3.80729e-09	ENSMUSG00000028234
Klhl8	1.89749e-13	0.0420701	0.067	0.032	3.81168e-09	ENSMUSG00000029312
Ndufa8	1.91607e-13	0.0481331	0.188	0.124	3.849e-09	ENSMUSG00000026895
Pls3	1.91986e-13	0.0468749	0.302	0.212	3.85661e-09	ENSMUSG00000016382
Prkaca	1.92099e-13	0.039537	0.209	0.14	3.85889e-09	ENSMUSG00000005469
Fibp	1.92878e-13	0.0424362	0.163	0.104	3.87453e-09	ENSMUSG00000024911
Ftl1	1.94323e-13	-0.0458052	0.963	0.931	3.90356e-09	ENSMUSG00000050708
St6gal1	1.94824e-13	0.0474751	0.135	0.082	3.91362e-09	ENSMUSG00000022885
Mbtps1	2.0725e-13	0.0495087	0.299	0.212	4.16323e-09	ENSMUSG00000031835
Ndufa1	2.27316e-13	0.0611768	0.466	0.343	4.56633e-09	ENSMUSG00000016427
Klf2	2.2754e-13	0.0614115	0.221	0.151	4.57082e-09	ENSMUSG00000055148
Tmem256	2.41637e-13	0.0330975	0.198	0.131	4.85401e-09	ENSMUSG00000070394
Gm20634	2.47179e-13	0.0169719	0.162	0.105	4.96533e-09	ENSMUSG00000070392
Abhd12	2.52248e-13	0.0488044	0.279	0.196	5.06716e-09	ENSMUSG00000032046
Aes	2.78497e-13	0.067783	0.557	0.41	5.59445e-09	ENSMUSG00000054452
Tln1	2.88363e-13	0.0817817	0.645	0.487	5.79263e-09	ENSMUSG00000028465
Mrps34	2.88743e-13	0.0348906	0.261	0.183	5.80028e-09	ENSMUSG00000038880
Ubr4	2.9261e-13	0.0414738	0.21	0.142	5.87796e-09	ENSMUSG00000066036
Dgcr2	3.04023e-13	0.0389206	0.284	0.199	6.10722e-09	ENSMUSG00000003166
Sil1	3.2123e-13	0.0427272	0.169	0.109	6.45287e-09	ENSMUSG00000024357
Gnaq	3.22485e-13	0.045775	0.295	0.208	6.47808e-09	ENSMUSG00000024639
Lamtor5	3.35985e-13	0.0474219	0.145	0.091	6.74927e-09	ENSMUSG00000087260
Tspan14	3.40041e-13	0.0549512	0.265	0.186	6.83075e-09	ENSMUSG00000037824
Pigs	3.54847e-13	0.0410371	0.139	0.086	7.12817e-09	ENSMUSG00000041958
Rbp1	3.56308e-13	0.061449	0.117	0.07	7.15752e-09	ENSMUSG00000046402
Pnpla2	3.5794e-13	0.046647	0.068	0.033	7.19031e-09	ENSMUSG00000025509
Higd2a	3.61225e-13	0.039847	0.313	0.221	7.25629e-09	ENSMUSG00000025868
Ddb1	3.76154e-13	0.0503215	0.295	0.21	7.55618e-09	ENSMUSG00000024740
Atp5d	3.76241e-13	0.0479332	0.254	0.176	7.55793e-09	ENSMUSG00000003072
Ptk7	3.78509e-13	0.0537499	0.13	0.079	7.60349e-09	ENSMUSG00000023972
Cnbp	3.85592e-13	-0.113679	0.734	0.675	7.74578e-09	ENSMUSG00000030057
Cpne1	4.00496e-13	0.0199839	0.28	0.196	8.04515e-09	ENSMUSG00000074643
Smpd1	4.07532e-13	0.0457605	0.17	0.11	8.18651e-09	ENSMUSG00000037049
Syt6	4.21876e-13	0.0403254	0.094	0.052	8.47465e-09	ENSMUSG00000027849
Wipi1	4.44626e-13	0.0457992	0.355	0.257	8.93165e-09	ENSMUSG00000041895
Trpa1	4.46124e-13	0.0335614	0.039	0.013	8.96175e-09	ENSMUSG00000032769
Cirbp	4.51984e-13	0.0513484	0.121	0.072	9.07946e-09	ENSMUSG00000045193
Psmb4	4.61167e-13	0.0446167	0.405	0.295	9.26392e-09	ENSMUSG00000005779
Adgra3	4.62809e-13	0.040196	0.132	0.081	9.29692e-09	ENSMUSG00000029090
Txn2	4.62959e-13	0.0366399	0.244	0.168	9.29991e-09	ENSMUSG00000005354
Dynlt1c	4.67622e-13	0.0305821	0.37	0.277	9.3936e-09	ENSMUSG00000000579
Mfge8	4.87067e-13	0.0521712	0.412	0.302	9.78419e-09	ENSMUSG00000030605
Atp5j	4.87125e-13	0.0540131	0.499	0.368	9.78537e-09	ENSMUSG00000022890
Trp53inp1	4.8807e-13	0.0407312	0.11	0.064	9.80435e-09	ENSMUSG00000028211
C1s1	4.91611e-13	-0.139641	0.682	0.64	9.87549e-09	ENSMUSG00000038521
Pip5k1a	5.0366e-13	0.0578459	0.125	0.076	1.01175e-08	ENSMUSG00000028126
Stx6	5.05765e-13	0.0425941	0.13	0.079	1.01598e-08	ENSMUSG00000026470
Tomm40	5.13028e-13	0.0505361	0.121	0.073	1.03057e-08	ENSMUSG00000002984
Ssr2	5.33543e-13	0.0592491	0.527	0.39	1.07178e-08	ENSMUSG00000041355
Tspan31	5.38016e-13	0.037533	0.366	0.264	1.08077e-08	ENSMUSG00000006736
Cuedc1	5.72897e-13	0.0412429	0.161	0.103	1.15083e-08	ENSMUSG00000018378
Mafg	5.84948e-13	0.0472857	0.153	0.098	1.17504e-08	ENSMUSG00000051510
Rras2	5.98162e-13	0.0430564	0.114	0.067	1.20159e-08	ENSMUSG00000055723
1810055G02Rik	6.05829e-13	0.0384213	0.159	0.102	1.21699e-08	ENSMUSG00000035372
Psmd2	6.18301e-13	0.0397409	0.217	0.147	1.24204e-08	ENSMUSG00000006998
Epb41l4b	6.21188e-13	0.0692746	0.347	0.256	1.24784e-08	ENSMUSG00000028434
Adamts15	6.36572e-13	0.0458667	0.045	0.018	1.27875e-08	ENSMUSG00000033453
Pisd	6.49078e-13	0.0392768	0.112	0.065	1.30387e-08	ENSMUSG00000023452
Rtcb	6.51912e-13	0.038363	0.152	0.096	1.30956e-08	ENSMUSG00000001783
Cobl	6.60077e-13	-0.0611642	0.01	0.03	1.32596e-08	ENSMUSG00000020173
Mmp9	6.78974e-13	0.0768203	0.045	0.018	1.36392e-08	ENSMUSG00000017737
Ubc	6.8297e-13	0.0980777	0.845	0.693	1.37195e-08	ENSMUSG00000008348
Aldh2	6.87703e-13	0.0738235	0.62	0.467	1.38146e-08	ENSMUSG00000029455
Csnk2b	6.91267e-13	0.0350238	0.368	0.265	1.38862e-08	ENSMUSG00000024387
Eno1b	6.94919e-13	0.0254814	0.252	0.175	1.39595e-08	ENSMUSG00000059040
Psmc3	7.1646e-13	0.0448952	0.283	0.2	1.43923e-08	ENSMUSG00000002102
Ndufa10	7.28808e-13	0.0406038	0.249	0.172	1.46403e-08	ENSMUSG00000026260
Ptpn11	7.28934e-13	0.0461276	0.212	0.144	1.46428e-08	ENSMUSG00000043733
Dusp1	7.44146e-13	0.0432868	0.127	0.077	1.49484e-08	ENSMUSG00000024190
Gm15417	7.50523e-13	0.0450217	0.06	0.028	1.50765e-08	ENSMUSG00000074466
Ptpn14	7.76845e-13	0.0444043	0.219	0.15	1.56053e-08	ENSMUSG00000026604
Lgmn	7.78359e-13	0.0442564	0.18	0.119	1.56357e-08	ENSMUSG00000021190
Cbln1	8.06726e-13	-0.209153	0.363	0.402	1.62055e-08	ENSMUSG00000031654
Tgfbr2	8.16035e-13	0.0400535	0.365	0.263	1.63925e-08	ENSMUSG00000032440
Cbfb	8.16582e-13	0.0374965	0.157	0.1	1.64035e-08	ENSMUSG00000031885
Rpl23a	8.17544e-13	-0.143734	0.782	0.753	1.64228e-08	ENSMUSG00000058546
Sema7a	8.25331e-13	0.0457594	0.213	0.145	1.65793e-08	ENSMUSG00000038264
Mzt2	8.34006e-13	0.0398811	0.103	0.059	1.67535e-08	ENSMUSG00000022671
Hist1h2ao	8.49369e-13	-0.0289529	0.015	0.039	1.70621e-08	ENSMUSG00000094248
Gpx1	8.72724e-13	0.0388726	0.279	0.196	1.75313e-08	ENSMUSG00000063856
Npepl1	8.83941e-13	0.0434352	0.108	0.063	1.77566e-08	ENSMUSG00000039263
Rps27l	9.24851e-13	0.035918	0.243	0.169	1.85784e-08	ENSMUSG00000036781
Car2	9.71522e-13	-0.159918	0.063	0.101	1.95159e-08	ENSMUSG00000027562
Cybb	9.94375e-13	0.076695	0.14	0.089	1.9975e-08	ENSMUSG00000015340
Susd2	1.007e-12	0.0573181	0.378	0.278	2.02286e-08	ENSMUSG00000006342
Romo1	1.02247e-12	0.0512762	0.132	0.082	2.05393e-08	ENSMUSG00000067847
Rps18	1.0484e-12	0.0386487	0.63	0.501	2.10603e-08	ENSMUSG00000008668
Lox	1.06433e-12	-0.145535	0.654	0.615	2.13802e-08	ENSMUSG00000024529
Ndufb7	1.07248e-12	0.0335258	0.211	0.142	2.1544e-08	ENSMUSG00000033938
Emc6	1.10773e-12	0.0517796	0.145	0.092	2.22521e-08	ENSMUSG00000047260
Tnc	1.15394e-12	-0.0583118	0.92	0.873	2.31803e-08	ENSMUSG00000028364
Aco1	1.16495e-12	0.0355071	0.155	0.099	2.34016e-08	ENSMUSG00000028405
Lamtor2	1.173e-12	0.0497859	0.132	0.082	2.35633e-08	ENSMUSG00000028062
Tmem165	1.20994e-12	0.0317759	0.269	0.188	2.43053e-08	ENSMUSG00000029234
Yipf5	1.23413e-12	0.0345758	0.327	0.235	2.47913e-08	ENSMUSG00000024487
Rab9	1.26474e-12	0.0336462	0.26	0.181	2.5406e-08	ENSMUSG00000079316
Cfb	1.30331e-12	0.0636149	0.405	0.311	2.61808e-08	ENSMUSG00000090231
Fkbp10	1.42125e-12	0.0425018	0.357	0.258	2.85501e-08	ENSMUSG00000001555
Spg7	1.42551e-12	0.0358484	0.167	0.108	2.86356e-08	ENSMUSG00000000738
Cxx1b	1.44167e-12	0.0533742	0.391	0.297	2.89602e-08	ENSMUSG00000067924
Pex2	1.45349e-12	0.0385154	0.188	0.126	2.91977e-08	ENSMUSG00000040374
Hist1h2ap	1.45674e-12	-0.0286957	0.015	0.039	2.9263e-08	ENSMUSG00000094777
Mrpl41	1.46919e-12	0.0356415	0.132	0.082	2.95132e-08	ENSMUSG00000036850
Rft1	1.48355e-12	0.0357323	0.095	0.053	2.98016e-08	ENSMUSG00000052395
Lfng	1.64077e-12	0.044345	0.302	0.216	3.29597e-08	ENSMUSG00000029570
Nmt1	1.65842e-12	0.0339059	0.217	0.149	3.33144e-08	ENSMUSG00000020936
Sh3bgrl3	1.67519e-12	0.0362477	0.25	0.174	3.36511e-08	ENSMUSG00000028843
Higd1a	1.70923e-12	0.0305837	0.098	0.056	3.4335e-08	ENSMUSG00000038412
Gpc1	1.74801e-12	0.0502842	0.219	0.15	3.5114e-08	ENSMUSG00000034220
Pdcd6	1.79808e-12	0.0376699	0.245	0.171	3.61198e-08	ENSMUSG00000021576
Mark1	1.80398e-12	0.036461	0.245	0.17	3.62383e-08	ENSMUSG00000026620
Gm28036	1.82544e-12	0.0161691	0.283	0.2	3.66694e-08	ENSMUSG00000098950
Eps8	1.91959e-12	0.0436083	0.067	0.033	3.85607e-08	ENSMUSG00000015766
Hyou1	1.92068e-12	0.0456912	0.184	0.123	3.85826e-08	ENSMUSG00000032115
Rffl	1.9418e-12	0.0338117	0.101	0.058	3.9007e-08	ENSMUSG00000020696
Yipf3	1.94322e-12	0.0390462	0.195	0.13	3.90355e-08	ENSMUSG00000071074
Vegfb	1.9559e-12	0.0464664	0.149	0.095	3.92902e-08	ENSMUSG00000024962
Slc7a6	1.96244e-12	0.0413172	0.099	0.057	3.94216e-08	ENSMUSG00000031904
Ftl1-ps1	2.01452e-12	-0.181276	0.254	0.31	4.04677e-08	ENSMUSG00000062382
Plxnd1	2.0385e-12	0.0452011	0.281	0.2	4.09494e-08	ENSMUSG00000030123
4933434E20Rik	2.08158e-12	0.0556043	0.151	0.097	4.18147e-08	ENSMUSG00000027942
0610012G03Rik	2.16958e-12	0.0330741	0.23	0.159	4.35825e-08	ENSMUSG00000107002
Camk2g	2.17094e-12	0.029251	0.106	0.062	4.36099e-08	ENSMUSG00000021820
Polr2l	2.19194e-12	0.0320987	0.16	0.104	4.40317e-08	ENSMUSG00000038489
Tpm2	2.28848e-12	0.0436325	0.15	0.096	4.5971e-08	ENSMUSG00000028464
Pdp2	2.50627e-12	0.045474	0.09	0.051	5.0346e-08	ENSMUSG00000048371
Tmem134	2.51444e-12	0.0293178	0.219	0.149	5.051e-08	ENSMUSG00000024845
Cttn	2.59476e-12	0.0378464	0.365	0.265	5.21234e-08	ENSMUSG00000031078
Shc1	2.65142e-12	0.0405051	0.417	0.305	5.32617e-08	ENSMUSG00000042626
Rps12-ps9	2.67739e-12	-0.144497	0.442	0.484	5.37834e-08	ENSMUSG00000069862
Akr1b3	2.68492e-12	0.048571	0.26	0.185	5.39347e-08	ENSMUSG00000001642
Oas1a	2.70481e-12	0.0284797	0.051	0.023	5.43342e-08	ENSMUSG00000052776
Scn1b	2.74422e-12	0.0399571	0.224	0.154	5.5126e-08	ENSMUSG00000019194
St3gal3	2.75996e-12	0.0405609	0.082	0.044	5.5442e-08	ENSMUSG00000028538
Rbbp7	2.79258e-12	0.0473899	0.44	0.324	5.60974e-08	ENSMUSG00000031353
Bak1	2.82642e-12	0.0393275	0.109	0.065	5.67772e-08	ENSMUSG00000057789
Tmem59	2.83145e-12	-0.0534564	0.89	0.817	5.68782e-08	ENSMUSG00000028618
Tubb2a	3.10576e-12	0.046681	0.19	0.128	6.23886e-08	ENSMUSG00000058672
Lias	3.12775e-12	0.0455577	0.154	0.1	6.28303e-08	ENSMUSG00000029199
Atp6v1f	3.14279e-12	0.0319094	0.227	0.156	6.31323e-08	ENSMUSG00000004285
Slc38a10	3.17852e-12	0.0321006	0.291	0.207	6.38502e-08	ENSMUSG00000061306
Sdc1	3.18e-12	0.054962	0.392	0.289	6.38798e-08	ENSMUSG00000020592
Acta2	3.18203e-12	0.0322255	0.021	0.004	6.39205e-08	ENSMUSG00000035783
Sc5d	3.30707e-12	0.0376501	0.112	0.067	6.64325e-08	ENSMUSG00000032018
Mgrn1	3.36185e-12	0.0460375	0.241	0.168	6.75328e-08	ENSMUSG00000022517
Plekhm3	3.37032e-12	0.0394352	0.181	0.122	6.7703e-08	ENSMUSG00000051344
Zwint	3.40241e-12	0.0394559	0.283	0.2	6.83476e-08	ENSMUSG00000019923
Gbe1	3.41911e-12	0.0470895	0.089	0.049	6.8683e-08	ENSMUSG00000022707
Tdg	3.57672e-12	0.0216743	0.1	0.058	7.18491e-08	ENSMUSG00000034674
Tmem147	3.62537e-12	0.0343229	0.167	0.109	7.28264e-08	ENSMUSG00000006315
Msmo1	3.67131e-12	0.0404899	0.066	0.033	7.37493e-08	ENSMUSG00000031604
Mtss1l	3.68912e-12	0.0521891	0.384	0.284	7.41071e-08	ENSMUSG00000033763
Slc25a39	3.71496e-12	0.0434972	0.215	0.148	7.46262e-08	ENSMUSG00000018677
Tm7sf3	3.71788e-12	0.0299617	0.166	0.108	7.46849e-08	ENSMUSG00000040234
Zbtb8os	3.72953e-12	0.0332565	0.115	0.069	7.49189e-08	ENSMUSG00000057572
Fto	3.78488e-12	0.0370316	0.221	0.152	7.60306e-08	ENSMUSG00000055932
Lgals3bp	3.83755e-12	0.0941608	0.803	0.649	7.70887e-08	ENSMUSG00000033880
Hunk	3.85938e-12	0.0371908	0.049	0.021	7.75273e-08	ENSMUSG00000053414
Ppp3ca	3.90044e-12	0.0468006	0.366	0.27	7.83521e-08	ENSMUSG00000028161
Hipk1	3.95128e-12	0.0330808	0.253	0.178	7.93734e-08	ENSMUSG00000008730
Snd1	4.12086e-12	0.0451355	0.279	0.199	8.27798e-08	ENSMUSG00000001424
Rmnd5b	4.20736e-12	0.0353882	0.099	0.057	8.45174e-08	ENSMUSG00000001054
Pabpn1	4.2457e-12	0.0450278	0.561	0.427	8.52876e-08	ENSMUSG00000022194
Top2a	4.25672e-12	-0.0823397	0.011	0.031	8.55089e-08	ENSMUSG00000020914
Gns	4.26707e-12	0.0660424	0.461	0.345	8.57168e-08	ENSMUSG00000034707
Rpl36a-ps3	4.26923e-12	0.0204219	0.23	0.16	8.57602e-08	ENSMUSG00000071141
Itih5	4.31244e-12	0.0905503	0.491	0.383	8.66284e-08	ENSMUSG00000025780
Cstf2t	4.35553e-12	0.03637	0.132	0.082	8.7494e-08	ENSMUSG00000053536
Pparg	4.45395e-12	0.0369588	0.266	0.189	8.94709e-08	ENSMUSG00000000440
Eif3b	4.47208e-12	0.0285328	0.201	0.136	8.98351e-08	ENSMUSG00000056076
Snrpe	4.48672e-12	0.0317452	0.311	0.226	9.01293e-08	ENSMUSG00000090553
Ganab	4.52203e-12	0.0455286	0.366	0.267	9.08386e-08	ENSMUSG00000071650
Aoc3	4.53013e-12	0.0467023	0.045	0.018	9.10013e-08	ENSMUSG00000019326
Morf4l1	4.56548e-12	-0.0570292	0.867	0.792	9.17113e-08	ENSMUSG00000062270
Nlrx1	4.5739e-12	0.0415058	0.062	0.03	9.18804e-08	ENSMUSG00000032109
Gm10335	5.22582e-12	-0.166907	0.286	0.328	1.04976e-07	ENSMUSG00000071532
Tmem62	5.2947e-12	0.0411285	0.084	0.046	1.0636e-07	ENSMUSG00000054484
1810010H24Rik	5.47581e-12	0.0355454	0.041	0.016	1.09998e-07	ENSMUSG00000078607
Slc25a3	5.49299e-12	0.0465375	0.477	0.355	1.10343e-07	ENSMUSG00000061904
Ctsz	5.4986e-12	0.0395605	0.456	0.337	1.10456e-07	ENSMUSG00000016256
Rnaset2b	5.54195e-12	0.0662738	0.61	0.495	1.11327e-07	ENSMUSG00000094724
Elp2	5.82328e-12	0.035031	0.15	0.097	1.16978e-07	ENSMUSG00000024271
Snx11	5.88102e-12	0.0412408	0.101	0.059	1.18138e-07	ENSMUSG00000020876
Eif4g1	5.90591e-12	0.0402982	0.42	0.308	1.18638e-07	ENSMUSG00000045983
2010107E04Rik	5.93119e-12	0.0346144	0.319	0.231	1.19146e-07	ENSMUSG00000021290
Arpc3	6.02642e-12	0.0290264	0.222	0.152	1.21059e-07	ENSMUSG00000029465
Lamb2	6.05752e-12	0.0445094	0.166	0.11	1.21683e-07	ENSMUSG00000052911
Psma5	6.10213e-12	0.0322453	0.189	0.128	1.2258e-07	ENSMUSG00000068749
Tcta	6.2277e-12	0.040605	0.167	0.11	1.25102e-07	ENSMUSG00000039461
Naa60	6.25143e-12	0.022581	0.194	0.131	1.25579e-07	ENSMUSG00000005982
Psma3	6.57698e-12	0.0198709	0.395	0.294	1.32118e-07	ENSMUSG00000060073
Crat	6.65628e-12	0.0386369	0.082	0.044	1.33711e-07	ENSMUSG00000026853
Tspan17	6.8464e-12	0.0330703	0.241	0.169	1.3753e-07	ENSMUSG00000025875
Psen2	6.94061e-12	0.0419348	0.13	0.082	1.39423e-07	ENSMUSG00000010609
Slc20a2	7.09831e-12	0.0556898	0.144	0.094	1.42591e-07	ENSMUSG00000037656
Vasp	7.21777e-12	0.0262809	0.254	0.178	1.44991e-07	ENSMUSG00000030403
Pgs1	7.32811e-12	0.0405257	0.18	0.121	1.47207e-07	ENSMUSG00000017715
Edar	7.33898e-12	0.0449394	0.163	0.108	1.47425e-07	ENSMUSG00000003227
Kat2b	7.38291e-12	0.0348503	0.135	0.086	1.48308e-07	ENSMUSG00000000708
Polr2i	7.44212e-12	0.0330334	0.101	0.059	1.49497e-07	ENSMUSG00000019738
Fkbp1a	7.77905e-12	0.0528166	0.513	0.38	1.56266e-07	ENSMUSG00000032966
Sec13	8.09183e-12	0.0316546	0.223	0.154	1.62549e-07	ENSMUSG00000030298
Tmem86a	8.1331e-12	0.057382	0.399	0.298	1.63378e-07	ENSMUSG00000010307
Itgav	8.32981e-12	0.0552572	0.526	0.391	1.67329e-07	ENSMUSG00000027087
Qrich1	8.49284e-12	0.0332283	0.175	0.117	1.70604e-07	ENSMUSG00000006673
Armcx2	8.51358e-12	0.0428973	0.194	0.132	1.71021e-07	ENSMUSG00000033436
Denr	8.53939e-12	0.0273228	0.246	0.172	1.71539e-07	ENSMUSG00000023106
Anxa2	8.58664e-12	0.0600702	0.535	0.405	1.72488e-07	ENSMUSG00000032231
Arhgap28	8.64488e-12	0.0541133	0.097	0.056	1.73658e-07	ENSMUSG00000024043
Ndufs4	8.96137e-12	0.0291992	0.262	0.185	1.80016e-07	ENSMUSG00000021764
Plin3	9.11665e-12	0.039865	0.151	0.098	1.83135e-07	ENSMUSG00000024197
Lrp10	9.14168e-12	0.0401432	0.117	0.072	1.83638e-07	ENSMUSG00000022175
Ctsf	9.24214e-12	0.0398011	0.349	0.254	1.85656e-07	ENSMUSG00000083282
Usf2	9.3034e-12	0.0320074	0.351	0.255	1.86887e-07	ENSMUSG00000058239
Cfl1	9.74877e-12	-0.0384531	0.94	0.892	1.95833e-07	ENSMUSG00000056201
Atp2a2	9.80272e-12	0.0463522	0.459	0.34	1.96917e-07	ENSMUSG00000029467
Arhgef11	9.85719e-12	0.0351461	0.21	0.144	1.98011e-07	ENSMUSG00000041977
Agrn	9.98885e-12	0.0357084	0.121	0.075	2.00656e-07	ENSMUSG00000041936
Phldb2	1.02234e-11	0.0420958	0.15	0.098	2.05368e-07	ENSMUSG00000033149
Vhl	1.02402e-11	0.0344366	0.149	0.096	2.05705e-07	ENSMUSG00000033933
Adamtsl3	1.02831e-11	0.0418051	0.085	0.048	2.06567e-07	ENSMUSG00000070469
Ipo9	1.03642e-11	0.0329171	0.18	0.12	2.08195e-07	ENSMUSG00000041879
Itm2a	1.03955e-11	-0.182343	0.466	0.471	2.08825e-07	ENSMUSG00000031239
Cog4	1.05829e-11	0.0381538	0.11	0.067	2.12589e-07	ENSMUSG00000031753
Fdx1	1.06757e-11	0.027958	0.193	0.13	2.14453e-07	ENSMUSG00000032051
Bri3	1.07401e-11	0.0380293	0.191	0.13	2.15747e-07	ENSMUSG00000047843
Raph1	1.08433e-11	0.0436056	0.167	0.111	2.1782e-07	ENSMUSG00000026014
Sav1	1.10047e-11	0.045813	0.377	0.277	2.21063e-07	ENSMUSG00000021067
Dkk3	1.11926e-11	0.052323	0.212	0.148	2.24837e-07	ENSMUSG00000030772
BC002163	1.12255e-11	0.0184521	0.302	0.217	2.25499e-07	ENSMUSG00000081824
Echs1	1.18023e-11	0.0226429	0.211	0.145	2.37085e-07	ENSMUSG00000025465
Selenbp1	1.18556e-11	0.0360142	0.086	0.049	2.38155e-07	ENSMUSG00000068874
Fgl2	1.22475e-11	0.0272508	0.196	0.133	2.46028e-07	ENSMUSG00000039899
Gm1821	1.2267e-11	-0.174222	0.526	0.565	2.4642e-07	ENSMUSG00000044285
Prdx6	1.23479e-11	0.0312488	0.217	0.15	2.48045e-07	ENSMUSG00000026701
Atp5j2	1.28465e-11	0.0249005	0.231	0.162	2.5806e-07	ENSMUSG00000038690
Nap1l4	1.28801e-11	0.0308368	0.312	0.224	2.58736e-07	ENSMUSG00000059119
Prpf8	1.29591e-11	0.0326808	0.342	0.249	2.60322e-07	ENSMUSG00000020850
Megf8	1.29854e-11	0.0506195	0.128	0.08	2.6085e-07	ENSMUSG00000045039
Sord	1.3164e-11	0.0307754	0.077	0.041	2.64438e-07	ENSMUSG00000027227
Id4	1.31803e-11	-0.184433	0.468	0.468	2.64766e-07	ENSMUSG00000021379
Paqr7	1.31873e-11	0.0355142	0.068	0.035	2.64907e-07	ENSMUSG00000037348
Adam15	1.32274e-11	0.0465621	0.236	0.167	2.65712e-07	ENSMUSG00000028041
Gm10132	1.32902e-11	-0.163552	0.285	0.326	2.66973e-07	ENSMUSG00000063556
Rfng	1.36638e-11	0.0409148	0.124	0.077	2.74479e-07	ENSMUSG00000025158
Naxe	1.39871e-11	0.034187	0.169	0.112	2.80972e-07	ENSMUSG00000028070
Cpt2	1.41021e-11	0.0333671	0.069	0.036	2.83283e-07	ENSMUSG00000028607
Mdp1	1.41846e-11	0.0358569	0.106	0.063	2.84941e-07	ENSMUSG00000002329
Gna12	1.44671e-11	0.0383996	0.15	0.098	2.90615e-07	ENSMUSG00000000149
Trappc1	1.47756e-11	0.0271648	0.257	0.18	2.96813e-07	ENSMUSG00000049299
Atp5g1	1.497e-11	0.0375475	0.366	0.275	3.00717e-07	ENSMUSG00000006057
Hist1h2ag	1.51142e-11	-0.0159558	0.01	0.028	3.03615e-07	ENSMUSG00000069301
Esd	1.52591e-11	0.0283671	0.298	0.214	3.06525e-07	ENSMUSG00000021996
Car1	1.53707e-11	-0.0581151	0.006	0.021	3.08767e-07	ENSMUSG00000027556
Psmd8	1.54259e-11	0.0289715	0.201	0.137	3.09876e-07	ENSMUSG00000030591
Elmo1	1.55095e-11	0.036721	0.097	0.056	3.11555e-07	ENSMUSG00000041112
Pxmp4	1.55302e-11	0.033861	0.19	0.13	3.1197e-07	ENSMUSG00000000876
Prkcsh	1.57797e-11	0.0314871	0.226	0.158	3.16983e-07	ENSMUSG00000003402
Slco1a5	1.58019e-11	-0.115801	0.059	0.094	3.17428e-07	ENSMUSG00000063975
Rpl35	1.59022e-11	-0.120287	0.76	0.72	3.19443e-07	ENSMUSG00000062997
Cited2	1.62631e-11	0.0318902	0.469	0.347	3.26694e-07	ENSMUSG00000039910
Qars	1.7304e-11	0.0371337	0.074	0.04	3.47603e-07	ENSMUSG00000032604
Snrpb	1.73192e-11	0.0299309	0.44	0.325	3.47908e-07	ENSMUSG00000027404
Vgll3	1.76572e-11	0.038648	0.051	0.023	3.54697e-07	ENSMUSG00000091243
Idh2	1.76855e-11	0.0365989	0.226	0.157	3.55266e-07	ENSMUSG00000030541
Srebf2	1.78552e-11	0.03309	0.156	0.103	3.58675e-07	ENSMUSG00000022463
Colgalt1	1.82679e-11	0.0343544	0.319	0.231	3.66965e-07	ENSMUSG00000034807
Ctdnep1	1.86088e-11	0.0355926	0.193	0.132	3.73814e-07	ENSMUSG00000018559
Cops6	1.86357e-11	0.0375099	0.264	0.189	3.74355e-07	ENSMUSG00000019494
P3h1	1.88319e-11	0.039693	0.144	0.093	3.78295e-07	ENSMUSG00000028641
Tex261	1.90572e-11	0.0411948	0.411	0.302	3.8282e-07	ENSMUSG00000014748
Pex5	1.91353e-11	0.0314362	0.106	0.063	3.8439e-07	ENSMUSG00000005069
Alg3	1.94388e-11	0.0259072	0.067	0.034	3.90487e-07	ENSMUSG00000033809
Mta3	1.96429e-11	0.0405103	0.082	0.045	3.94587e-07	ENSMUSG00000055817
Isg15	1.98166e-11	0.0409683	0.113	0.07	3.98076e-07	ENSMUSG00000035692
Dync1h1	2.04907e-11	0.0402309	0.192	0.132	4.11617e-07	ENSMUSG00000018707
Hist2h2aa2	2.06189e-11	0.0132148	0.125	0.079	4.14192e-07	ENSMUSG00000063954
Pfdn5	2.06355e-11	0.0389236	0.351	0.257	4.14526e-07	ENSMUSG00000001289
Agtrap	2.06831e-11	0.0386901	0.234	0.164	4.15482e-07	ENSMUSG00000029007
Fzd5	2.07456e-11	0.0502286	0.414	0.309	4.16737e-07	ENSMUSG00000045005
G0s2	2.10016e-11	0.0485402	0.093	0.054	4.2188e-07	ENSMUSG00000009633
AC099934.3	2.10776e-11	0.0192833	0.308	0.224	4.23407e-07	ENSMUSG00000113149
Abcf1	2.13438e-11	0.0286065	0.248	0.176	4.28755e-07	ENSMUSG00000038762
Stat5a	2.14607e-11	0.0418798	0.119	0.074	4.31103e-07	ENSMUSG00000004043
Il15	2.15804e-11	0.0477648	0.153	0.101	4.33506e-07	ENSMUSG00000031712
Rps12-ps4	2.20617e-11	-0.145666	0.524	0.557	4.43176e-07	ENSMUSG00000109509
Hspa5	2.27424e-11	-0.0470115	0.941	0.892	4.56849e-07	ENSMUSG00000026864
Ogdh	2.28977e-11	0.0286637	0.348	0.253	4.59968e-07	ENSMUSG00000020456
Xpnpep1	2.29091e-11	0.0356669	0.145	0.095	4.60198e-07	ENSMUSG00000025027
Fads3	2.30275e-11	0.031555	0.297	0.214	4.62577e-07	ENSMUSG00000024664
Snrpc	2.35859e-11	0.0317523	0.258	0.184	4.73793e-07	ENSMUSG00000024217
Pbxip1	2.37534e-11	0.0414435	0.3	0.218	4.77158e-07	ENSMUSG00000042613
Gorasp2	2.38365e-11	0.0298273	0.237	0.165	4.78827e-07	ENSMUSG00000014959
Selenok	2.38674e-11	0.0400864	0.443	0.327	4.79449e-07	ENSMUSG00000042682
Svbp	2.40201e-11	0.0257446	0.156	0.102	4.82517e-07	ENSMUSG00000028643
Bmp1	2.4035e-11	0.0432433	0.41	0.305	4.82814e-07	ENSMUSG00000022098
Slc25a5	2.43683e-11	0.0477997	0.487	0.365	4.8951e-07	ENSMUSG00000016319
Jtb	2.44161e-11	0.0361254	0.345	0.252	4.90471e-07	ENSMUSG00000027937
C130074G19Rik	2.45079e-11	0.0400237	0.187	0.127	4.92315e-07	ENSMUSG00000039349
Pgp	2.51391e-11	0.0331619	0.096	0.056	5.04995e-07	ENSMUSG00000043445
Flna	2.64537e-11	0.0868894	0.615	0.473	5.31402e-07	ENSMUSG00000031328
Ndufs6	2.74009e-11	0.032152	0.189	0.129	5.50429e-07	ENSMUSG00000021606
Cldn11	2.79153e-11	0.0692584	0.051	0.024	5.60762e-07	ENSMUSG00000037625
Rnpep	2.83012e-11	0.0364116	0.094	0.055	5.68515e-07	ENSMUSG00000041926
Wdr86	2.83088e-11	0.0274176	0.362	0.263	5.68667e-07	ENSMUSG00000055235
Gpr107	2.8485e-11	0.0347109	0.188	0.128	5.72206e-07	ENSMUSG00000000194
Hgsnat	2.88062e-11	0.0331331	0.227	0.158	5.78659e-07	ENSMUSG00000037260
Rps27rt	2.89658e-11	-0.101225	0.802	0.755	5.81864e-07	ENSMUSG00000050621
Klhl29	2.906e-11	0.0509079	0.068	0.036	5.83757e-07	ENSMUSG00000020627
Spp1	2.93948e-11	0.0891878	0.746	0.595	5.90484e-07	ENSMUSG00000029304
Rps27	2.97111e-11	-0.0977044	0.826	0.771	5.96836e-07	ENSMUSG00000090733
Slc45a4	3.00726e-11	0.0515642	0.087	0.05	6.04099e-07	ENSMUSG00000079020
Aco2	3.10369e-11	0.0283743	0.256	0.183	6.2347e-07	ENSMUSG00000022477
Fos	3.12406e-11	0.0411164	0.402	0.308	6.27561e-07	ENSMUSG00000021250
Abhd16a	3.15354e-11	0.0396969	0.297	0.215	6.33484e-07	ENSMUSG00000007036
S100a1	3.15583e-11	0.0340067	0.282	0.204	6.33943e-07	ENSMUSG00000044080
Clic1	3.22235e-11	0.0243251	0.225	0.157	6.47305e-07	ENSMUSG00000007041
Hic1	3.27701e-11	0.0378647	0.123	0.077	6.58286e-07	ENSMUSG00000043099
St6galnac6	3.33593e-11	0.0249053	0.174	0.117	6.70122e-07	ENSMUSG00000026811
Olfml2b	3.36904e-11	-0.113545	0.705	0.662	6.76773e-07	ENSMUSG00000038463
Ip6k2	3.42109e-11	0.0372781	0.15	0.098	6.87229e-07	ENSMUSG00000032599
Ndrg1	3.49703e-11	0.0391899	0.161	0.108	7.02484e-07	ENSMUSG00000005125
Tob2	3.51304e-11	0.0514617	0.255	0.184	7.05699e-07	ENSMUSG00000048546
Snhg18	3.54869e-11	0.0361495	0.31	0.225	7.12862e-07	ENSMUSG00000096956
Unc93b1	3.64413e-11	0.0369774	0.193	0.132	7.32034e-07	ENSMUSG00000036908
Clmp	3.66113e-11	0.0774098	0.673	0.519	7.35447e-07	ENSMUSG00000032024
Rsrp1	3.66587e-11	-0.181392	0.46	0.467	7.36401e-07	ENSMUSG00000037266
Swap70	3.74158e-11	0.0394777	0.154	0.102	7.51608e-07	ENSMUSG00000031015
Puf60	3.91098e-11	0.0383923	0.295	0.215	7.85637e-07	ENSMUSG00000002524
Ap1b1	3.92396e-11	0.0372658	0.07	0.037	7.88245e-07	ENSMUSG00000009090
Aldh3a1	3.92862e-11	0.0353657	0.205	0.143	7.89182e-07	ENSMUSG00000019102
Oas1g	3.96419e-11	0.0220481	0.044	0.019	7.96327e-07	ENSMUSG00000066861
Snrpd1	4.0086e-11	0.0398458	0.197	0.137	8.05248e-07	ENSMUSG00000002477
Triap1	4.02819e-11	0.0331405	0.128	0.081	8.09182e-07	ENSMUSG00000029535
Cxcl5	4.06281e-11	0.0318046	0.015	0.002	8.16137e-07	ENSMUSG00000029371
Mydgf	4.17012e-11	0.0306547	0.21	0.145	8.37693e-07	ENSMUSG00000019579
Lbh	4.18393e-11	0.0305823	0.335	0.245	8.40467e-07	ENSMUSG00000024063
Ppme1	4.25285e-11	0.0377571	0.13	0.083	8.54312e-07	ENSMUSG00000030718
B4galt1	4.27613e-11	0.0271701	0.262	0.187	8.58989e-07	ENSMUSG00000028413
Csf1	4.28563e-11	-0.0488237	0.893	0.82	8.60898e-07	ENSMUSG00000014599
Dvl3	4.4578e-11	0.0349172	0.155	0.103	8.95484e-07	ENSMUSG00000003233
Oaz2	4.48945e-11	0.0358408	0.185	0.126	9.01841e-07	ENSMUSG00000040652
Ano8	4.52053e-11	0.0445578	0.081	0.046	9.08085e-07	ENSMUSG00000034863
Ndnf	4.63571e-11	0.0400758	0.169	0.114	9.31222e-07	ENSMUSG00000049001
Dhrs7	4.70749e-11	0.0222542	0.244	0.172	9.4564e-07	ENSMUSG00000021094
Dtd2	4.74546e-11	0.0365073	0.077	0.042	9.53268e-07	ENSMUSG00000020956
Nfkb1	4.77117e-11	0.0342916	0.19	0.131	9.58433e-07	ENSMUSG00000028163
Rpl39l	4.81817e-11	0.0399898	0.174	0.118	9.67873e-07	ENSMUSG00000039209
Rab29	4.8478e-11	0.0430098	0.073	0.039	9.73825e-07	ENSMUSG00000026433
Lrrn1	4.92562e-11	0.0487996	0.049	0.023	9.89459e-07	ENSMUSG00000034648
Mtfr1l	4.98125e-11	0.0404246	0.296	0.214	1.00063e-06	ENSMUSG00000046671
Ndufb11	5.0512e-11	0.0212846	0.342	0.251	1.01469e-06	ENSMUSG00000031059
Ier3ip1	5.07465e-11	0.0386722	0.376	0.281	1.0194e-06	ENSMUSG00000090000
R3hdm4	5.10696e-11	0.0337045	0.42	0.311	1.02589e-06	ENSMUSG00000035781
Cox14	5.1508e-11	0.0315615	0.183	0.124	1.03469e-06	ENSMUSG00000023020
Zzef1	5.387e-11	0.0469583	0.117	0.074	1.08214e-06	ENSMUSG00000055670
Ndufa7	5.42396e-11	0.0293865	0.416	0.307	1.08956e-06	ENSMUSG00000041881
Swi5	5.47081e-11	0.0265318	0.316	0.23	1.09898e-06	ENSMUSG00000044627
Ube2z	5.53708e-11	0.0361376	0.154	0.102	1.11229e-06	ENSMUSG00000014349
7530428D23Rik	5.55701e-11	0.0538168	0.196	0.138	1.11629e-06	ENSMUSG00000103441
Mpnd	5.59998e-11	0.0365961	0.093	0.055	1.12492e-06	ENSMUSG00000003199
Gm6169	5.60234e-11	0.0286909	0.142	0.093	1.1254e-06	ENSMUSG00000057762
Ak3	5.61682e-11	-0.103539	0.717	0.662	1.12831e-06	ENSMUSG00000024782
Rnf123	5.75359e-11	0.0373838	0.061	0.031	1.15578e-06	ENSMUSG00000041528
Gstp2	5.78111e-11	0.0389588	0.642	0.506	1.16131e-06	ENSMUSG00000038155
Txndc15	5.80004e-11	0.0317394	0.2	0.138	1.16511e-06	ENSMUSG00000021497
Brk1	5.91943e-11	0.0222502	0.289	0.208	1.1891e-06	ENSMUSG00000033940
Rai1	5.93957e-11	0.0397832	0.145	0.095	1.19314e-06	ENSMUSG00000062115
Grb14	5.94038e-11	0.0170809	0.155	0.102	1.1933e-06	ENSMUSG00000026888
Psmb10	6.0837e-11	0.0219926	0.314	0.227	1.22209e-06	ENSMUSG00000031897
Ppp4c	6.13972e-11	0.0198566	0.248	0.176	1.23335e-06	ENSMUSG00000030697
Psmf1	6.24326e-11	0.0332507	0.116	0.073	1.25415e-06	ENSMUSG00000032869
Ift20	6.34766e-11	0.0378468	0.378	0.279	1.27512e-06	ENSMUSG00000001105
Hist2h2aa1	6.44266e-11	0.0116825	0.126	0.081	1.2942e-06	ENSMUSG00000064220
Taf9	6.55189e-11	0.0144837	0.178	0.121	1.31614e-06	ENSMUSG00000052293
Gnb2	6.66431e-11	0.0178511	0.333	0.242	1.33873e-06	ENSMUSG00000029713
Ptbp1	6.69712e-11	0.0322344	0.245	0.175	1.34532e-06	ENSMUSG00000006498
Svil	6.69871e-11	0.032408	0.158	0.105	1.34564e-06	ENSMUSG00000024236
Lmna	6.90953e-11	0.0293762	0.182	0.124	1.38799e-06	ENSMUSG00000028063
Smo	6.91883e-11	0.029656	0.258	0.184	1.38986e-06	ENSMUSG00000001761
Acan	7.00861e-11	0.0464708	0.066	0.035	1.40789e-06	ENSMUSG00000030607
Prdx3	7.26317e-11	0.0355934	0.113	0.07	1.45903e-06	ENSMUSG00000024997
Sema6d	7.28116e-11	-0.21381	0.241	0.276	1.46264e-06	ENSMUSG00000027200
Pdhb	7.36177e-11	0.0275777	0.168	0.114	1.47883e-06	ENSMUSG00000021748
Ece1	7.37898e-11	0.0457823	0.282	0.205	1.48229e-06	ENSMUSG00000057530
Ifngr1	7.40801e-11	0.0519603	0.53	0.4	1.48812e-06	ENSMUSG00000020009
Ssr4	7.47857e-11	0.0336074	0.294	0.215	1.5023e-06	ENSMUSG00000002014
Smagp	7.48309e-11	0.0317981	0.109	0.067	1.5032e-06	ENSMUSG00000053559
Egln1	7.5171e-11	0.0277236	0.213	0.148	1.51003e-06	ENSMUSG00000031987
Sdhd	7.51943e-11	0.0314942	0.297	0.215	1.5105e-06	ENSMUSG00000000171
Adm	7.60873e-11	0.0458304	0.049	0.023	1.52844e-06	ENSMUSG00000030790
Slc25a51	7.61413e-11	0.032004	0.183	0.125	1.52953e-06	ENSMUSG00000045973
Eif4ebp1	7.75743e-11	0.039309	0.144	0.095	1.55831e-06	ENSMUSG00000031490
Rnf11	7.87794e-11	0.0293611	0.212	0.149	1.58252e-06	ENSMUSG00000028557
Glipr1	8.07462e-11	0.0281269	0.025	0.007	1.62203e-06	ENSMUSG00000056888
Gm13340	8.29499e-11	0.0435168	0.12	0.076	1.6663e-06	ENSMUSG00000083563
Ankrd40	8.30528e-11	0.0443543	0.226	0.161	1.66837e-06	ENSMUSG00000020864
P4ha2	8.37506e-11	0.0317954	0.07	0.037	1.68238e-06	ENSMUSG00000018906
Ctdsp2	8.39906e-11	0.0545721	0.558	0.424	1.6872e-06	ENSMUSG00000078429
Tpra1	8.54481e-11	0.0251388	0.238	0.168	1.71648e-06	ENSMUSG00000002871
Ndufa9	8.72003e-11	0.0344098	0.161	0.108	1.75168e-06	ENSMUSG00000000399
Nubp2	8.76885e-11	0.0314089	0.101	0.061	1.76149e-06	ENSMUSG00000039183
Capza2	8.80351e-11	0.0348776	0.339	0.249	1.76845e-06	ENSMUSG00000015733
Epb41l5	8.83769e-11	0.0459683	0.086	0.05	1.77531e-06	ENSMUSG00000026383
Ndufb8	9.15802e-11	0.0271061	0.389	0.289	1.83966e-06	ENSMUSG00000025204
Dynlt1f	9.66624e-11	0.0203943	0.338	0.26	1.94175e-06	ENSMUSG00000095677
Atp1b3	9.6753e-11	0.0263353	0.298	0.218	1.94357e-06	ENSMUSG00000032412
Larp1b	1.001e-10	0.0413679	0.072	0.04	2.0108e-06	ENSMUSG00000025762
Gapdh	1.02507e-10	0.0315493	0.729	0.622	2.05917e-06	ENSMUSG00000057666
Srprb	1.06904e-10	0.0367817	0.096	0.058	2.1475e-06	ENSMUSG00000032553
Man2b2	1.0758e-10	0.0537042	0.554	0.423	2.16108e-06	ENSMUSG00000029119
Col16a1	1.08658e-10	0.0373896	0.163	0.11	2.18272e-06	ENSMUSG00000040690
Rnf181	1.09365e-10	0.0338964	0.205	0.144	2.19692e-06	ENSMUSG00000055850
Colec12	1.10059e-10	-0.0755909	0.798	0.724	2.21087e-06	ENSMUSG00000036103
Rassf1	1.11628e-10	0.0244303	0.153	0.101	2.24239e-06	ENSMUSG00000010067
Fah	1.12652e-10	0.028283	0.083	0.047	2.26296e-06	ENSMUSG00000030630
Creld1	1.14987e-10	0.0339737	0.073	0.04	2.30986e-06	ENSMUSG00000030284
Coa3	1.18366e-10	0.0310962	0.159	0.107	2.37773e-06	ENSMUSG00000017188
Papss1	1.19665e-10	0.0235101	0.214	0.149	2.40383e-06	ENSMUSG00000028032
Mmp2	1.20076e-10	0.0600867	0.152	0.102	2.41208e-06	ENSMUSG00000031740
Ndufv2	1.26496e-10	0.030072	0.354	0.263	2.54105e-06	ENSMUSG00000024099
Atp5e	1.26979e-10	0.0370198	0.467	0.347	2.55075e-06	ENSMUSG00000016252
Cnih1	1.27296e-10	0.0329254	0.188	0.13	2.55713e-06	ENSMUSG00000015759
Uggt1	1.29392e-10	0.0381923	0.161	0.108	2.59923e-06	ENSMUSG00000037470
Fam20c	1.29664e-10	0.036495	0.045	0.02	2.6047e-06	ENSMUSG00000025854
Pmpcb	1.29795e-10	0.017804	0.234	0.166	2.60733e-06	ENSMUSG00000029017
Amfr	1.32619e-10	0.032071	0.201	0.14	2.66406e-06	ENSMUSG00000031751
Ptpa	1.33851e-10	0.0400044	0.079	0.045	2.68879e-06	ENSMUSG00000039515
Raly	1.38746e-10	0.0238695	0.186	0.128	2.78714e-06	ENSMUSG00000027593
Mlf2	1.4164e-10	0.0468994	0.517	0.389	2.84527e-06	ENSMUSG00000030120
Fam43a	1.50764e-10	0.0667445	0.187	0.132	3.02854e-06	ENSMUSG00000046546
Zfyve21	1.51108e-10	0.029524	0.227	0.161	3.03546e-06	ENSMUSG00000021286
Alg5	1.52285e-10	0.033746	0.124	0.08	3.0591e-06	ENSMUSG00000036632
1810058I24Rik	1.53313e-10	0.0227366	0.297	0.215	3.07974e-06	ENSMUSG00000073155
Psmc4	1.56395e-10	0.0187693	0.168	0.114	3.14165e-06	ENSMUSG00000030603
Smoc2	1.56561e-10	0.0354401	0.068	0.037	3.145e-06	ENSMUSG00000023886
Ddit4l	1.57143e-10	-0.17133	0.164	0.207	3.15669e-06	ENSMUSG00000046818
Trim47	1.5926e-10	0.0475479	0.093	0.055	3.19922e-06	ENSMUSG00000020773
Pnisr	1.60501e-10	0.0266596	0.343	0.254	3.22414e-06	ENSMUSG00000028248
Slc39a3	1.6307e-10	0.0299752	0.101	0.061	3.27574e-06	ENSMUSG00000046822
Dirc2	1.63917e-10	0.0286347	0.136	0.088	3.29276e-06	ENSMUSG00000022848
Tsc22d4	1.64016e-10	0.0273658	0.239	0.171	3.29475e-06	ENSMUSG00000029723
Lzts2	1.65611e-10	0.0338023	0.124	0.079	3.32679e-06	ENSMUSG00000035342
Rps3	1.66142e-10	-0.119311	0.686	0.635	3.33747e-06	ENSMUSG00000030744
Ndufa12	1.67946e-10	0.0102424	0.257	0.186	3.37371e-06	ENSMUSG00000020022
51564	1.7352e-10	0.0192029	0.47	0.356	3.48567e-06	NA
Ercc3	1.74607e-10	0.025947	0.134	0.087	3.50751e-06	ENSMUSG00000024382
Acadl	1.76567e-10	0.0235251	0.33	0.243	3.54688e-06	ENSMUSG00000026003
U2af1	1.78462e-10	0.024196	0.225	0.161	3.58494e-06	ENSMUSG00000061613
Cald1	1.82523e-10	-0.0538539	0.825	0.746	3.66653e-06	ENSMUSG00000029761
Gm8355	1.89645e-10	-0.171701	0.371	0.393	3.80958e-06	ENSMUSG00000093798
Tfdp1	1.93466e-10	0.0251213	0.145	0.096	3.88634e-06	ENSMUSG00000038482
Hsdl2	1.96352e-10	0.0305419	0.128	0.083	3.94432e-06	ENSMUSG00000028383
Ak5	2.04891e-10	0.0275158	0.038	0.016	4.11585e-06	ENSMUSG00000039058
Cpa3	2.06371e-10	-0.0274908	0	0.008	4.14559e-06	ENSMUSG00000001865
Camk2d	2.07518e-10	0.0328627	0.187	0.13	4.16863e-06	ENSMUSG00000053819
Ildr2	2.13376e-10	-0.147472	0.11	0.148	4.2863e-06	ENSMUSG00000040612
Abl1	2.15223e-10	0.0255052	0.202	0.142	4.3234e-06	ENSMUSG00000026842
Mrps12	2.16948e-10	0.0265483	0.136	0.089	4.35804e-06	ENSMUSG00000045948
St3gal1	2.17011e-10	-0.202416	0.328	0.35	4.35931e-06	ENSMUSG00000013846
Slc4a7	2.17265e-10	0.037768	0.063	0.034	4.36442e-06	ENSMUSG00000021733
Copg1	2.22459e-10	0.0243711	0.352	0.26	4.46875e-06	ENSMUSG00000030058
Pin1	2.22976e-10	0.0207661	0.124	0.079	4.47914e-06	ENSMUSG00000032171
Samd4	2.23314e-10	0.0515334	0.078	0.044	4.48594e-06	ENSMUSG00000021838
Anxa7	2.24195e-10	0.0339065	0.251	0.181	4.50363e-06	ENSMUSG00000021814
Slc22a17	2.34661e-10	0.0415028	0.115	0.073	4.71388e-06	ENSMUSG00000022199
Rab11a	2.37268e-10	0.0323805	0.242	0.174	4.76624e-06	ENSMUSG00000004771
Dbnl	2.37595e-10	0.028937	0.12	0.076	4.7728e-06	ENSMUSG00000020476
Bcar1	2.40278e-10	0.0338669	0.125	0.08	4.82671e-06	ENSMUSG00000031955
Ap3d1	2.43849e-10	0.0256107	0.3	0.22	4.89843e-06	ENSMUSG00000020198
Hoxa7	2.45793e-10	0.0363724	0.17	0.116	4.93749e-06	ENSMUSG00000038236
Tmem258	2.48192e-10	0.0378836	0.456	0.344	4.98567e-06	ENSMUSG00000036372
Gm6749	2.50899e-10	-0.0259297	0.012	0.031	5.04006e-06	ENSMUSG00000107751
Slc4a2	2.55279e-10	0.0357034	0.117	0.075	5.12804e-06	ENSMUSG00000028962
Pfn1	2.5976e-10	0.049131	0.542	0.41	5.21806e-06	ENSMUSG00000018293
Smim4	2.61794e-10	0.0253115	0.155	0.104	5.25892e-06	ENSMUSG00000058351
Map2k2	2.63725e-10	0.0306406	0.109	0.068	5.29771e-06	ENSMUSG00000035027
Gm15501	2.65621e-10	-0.122126	0.199	0.249	5.33579e-06	ENSMUSG00000087412
Tdg-ps	2.68924e-10	0.0174317	0.061	0.032	5.40214e-06	ENSMUSG00000047347
Dock1	2.72279e-10	0.0313603	0.162	0.11	5.46955e-06	ENSMUSG00000058325
Ldlr	2.79183e-10	0.033462	0.051	0.025	5.60824e-06	ENSMUSG00000032193
Nsg1	2.8582e-10	0.0425519	0.32	0.237	5.74155e-06	ENSMUSG00000029126
Pcif1	2.86047e-10	0.0325394	0.147	0.098	5.74612e-06	ENSMUSG00000039849
Vps36	2.87657e-10	0.0265087	0.159	0.108	5.77846e-06	ENSMUSG00000031479
Def8	2.90028e-10	0.0251967	0.089	0.053	5.82608e-06	ENSMUSG00000001482
Rps6-ps4	2.96783e-10	-0.156147	0.46	0.48	5.96178e-06	ENSMUSG00000081406
Nomo1	3.00106e-10	0.0402498	0.122	0.078	6.02853e-06	ENSMUSG00000030835
Hadhb	3.01177e-10	0.0116491	0.22	0.154	6.05004e-06	ENSMUSG00000059447
Pts	3.01993e-10	0.031259	0.11	0.069	6.06643e-06	ENSMUSG00000032067
Abhd2	3.06309e-10	0.0271566	0.16	0.108	6.15313e-06	ENSMUSG00000039202
Hist1h2an	3.0958e-10	-0.0119058	0.008	0.025	6.21885e-06	ENSMUSG00000069309
Trf	3.11553e-10	-0.144594	0.578	0.584	6.25847e-06	ENSMUSG00000032554
Urm1	3.15449e-10	0.0349507	0.13	0.085	6.33675e-06	ENSMUSG00000069020
AC153153.2	3.21471e-10	-0.033469	0.019	0.041	6.45772e-06	ENSMUSG00000114759
Hk1	3.24545e-10	0.0299327	0.089	0.053	6.51945e-06	ENSMUSG00000037012
Acer2	3.30614e-10	0.03115	0.036	0.014	6.64138e-06	ENSMUSG00000038007
Asah1	3.33368e-10	0.0273829	0.271	0.197	6.69669e-06	ENSMUSG00000031591
Abhd17a	3.36705e-10	0.0242942	0.095	0.057	6.76373e-06	ENSMUSG00000003346
Glrx5	3.41919e-10	0.025054	0.193	0.134	6.86847e-06	ENSMUSG00000021102
Sec24c	3.43132e-10	0.0275078	0.19	0.132	6.89283e-06	ENSMUSG00000039367
Psmc2	3.52291e-10	0.015972	0.25	0.179	7.07682e-06	ENSMUSG00000028932
Pttg1	3.60271e-10	0.0246752	0.204	0.144	7.23712e-06	ENSMUSG00000020415
Plxdc2	3.69837e-10	0.0921409	0.813	0.656	7.42929e-06	ENSMUSG00000026748
Myh11	3.77857e-10	-0.032977	0.003	0.014	7.59039e-06	ENSMUSG00000018830
Ltbp3	3.80733e-10	0.0264011	0.432	0.322	7.64817e-06	ENSMUSG00000024940
Kcnh1	3.83373e-10	0.0308125	0.045	0.02	7.70119e-06	ENSMUSG00000058248
Maged2	3.91927e-10	0.0280496	0.19	0.133	7.87303e-06	ENSMUSG00000025268
Dstn	4.0279e-10	0.0602695	0.599	0.455	8.09125e-06	ENSMUSG00000015932
Zcchc17	4.06362e-10	0.0311302	0.16	0.109	8.16301e-06	ENSMUSG00000028772
1810013L24Rik	4.07645e-10	0.0476129	0.169	0.116	8.18878e-06	ENSMUSG00000022507
AC107755.1	4.15027e-10	0.0221677	0.027	0.009	8.33705e-06	ENSMUSG00000111556
Plxnb2	4.15113e-10	0.036638	0.196	0.138	8.33879e-06	ENSMUSG00000036606
Slc22a8	4.16897e-10	0.0373823	0.03	0.011	8.37462e-06	ENSMUSG00000063796
Rab4b	4.20603e-10	0.0146486	0.228	0.163	8.44908e-06	ENSMUSG00000053291
1810022K09Rik	4.21506e-10	0.0173058	0.268	0.197	8.46722e-06	ENSMUSG00000078784
Dbn1	4.23071e-10	0.032368	0.123	0.079	8.49865e-06	ENSMUSG00000034675
Itsn1	4.24156e-10	0.031784	0.212	0.151	8.52044e-06	ENSMUSG00000022957
Hdac4	4.26583e-10	0.0325465	0.088	0.052	8.56921e-06	ENSMUSG00000026313
Numbl	4.26585e-10	0.03085	0.105	0.066	8.56925e-06	ENSMUSG00000063160
Pdlim2	4.27971e-10	0.0394473	0.344	0.256	8.59709e-06	ENSMUSG00000022090
Ptpn21	4.28914e-10	0.0341409	0.096	0.058	8.61603e-06	ENSMUSG00000021009
2210013O21Rik	4.30748e-10	0.0200787	0.201	0.14	8.65286e-06	ENSMUSG00000086316
4931406C07Rik	4.4156e-10	0.0259993	0.163	0.111	8.87005e-06	ENSMUSG00000031938
Gltp	4.44282e-10	0.0278706	0.246	0.178	8.92474e-06	ENSMUSG00000011884
Sra1	4.4614e-10	0.0168535	0.309	0.225	8.96206e-06	ENSMUSG00000006050
Ctif	4.48876e-10	0.0313776	0.095	0.058	9.01702e-06	ENSMUSG00000052928
Odc1	4.56528e-10	0.0229045	0.301	0.222	9.17073e-06	ENSMUSG00000011179
Foxc1	4.6485e-10	-0.0666205	0.862	0.784	9.3379e-06	ENSMUSG00000050295
Scarb2	4.65599e-10	0.0279317	0.291	0.213	9.35295e-06	ENSMUSG00000029426
Ddah2	4.66889e-10	0.0162105	0.171	0.117	9.37886e-06	ENSMUSG00000007039
Cox7a2	4.70012e-10	0.0225748	0.256	0.187	9.4416e-06	ENSMUSG00000032330
Tspan4	4.71253e-10	0.017659	0.257	0.185	9.46652e-06	ENSMUSG00000025511
Mrps21	4.73968e-10	0.0226847	0.264	0.194	9.52108e-06	ENSMUSG00000054312
Aars	4.74116e-10	0.02978	0.141	0.095	9.52404e-06	ENSMUSG00000031960
Colec11	4.95327e-10	-0.0694716	0.025	0.049	9.95013e-06	ENSMUSG00000036655
Dclk2	4.98846e-10	0.0262356	0.052	0.026	1.00208e-05	ENSMUSG00000028078
Id1	5.02725e-10	0.0267893	0.052	0.025	1.00987e-05	ENSMUSG00000042745
Hnrnpl	5.02821e-10	0.0183023	0.362	0.268	1.01007e-05	ENSMUSG00000015165
Strn4	5.06315e-10	0.0277886	0.165	0.112	1.01709e-05	ENSMUSG00000030374
Sel1l	5.23627e-10	0.0319994	0.358	0.268	1.05186e-05	ENSMUSG00000020964
Syvn1	5.28173e-10	0.0157981	0.147	0.099	1.06099e-05	ENSMUSG00000024807
Ap1s1	5.58889e-10	0.0159292	0.156	0.105	1.1227e-05	ENSMUSG00000004849
Coq9	5.59042e-10	0.0345717	0.111	0.071	1.123e-05	ENSMUSG00000031782
Cldn10	5.5924e-10	-0.196227	0.368	0.384	1.1234e-05	ENSMUSG00000022132
Sppl3	5.64596e-10	0.0296628	0.264	0.193	1.13416e-05	ENSMUSG00000029550
Trpc4ap	5.64977e-10	0.0261279	0.194	0.136	1.13493e-05	ENSMUSG00000038324
Dagla	5.66707e-10	0.0317224	0.03	0.011	1.1384e-05	ENSMUSG00000035735
Plrg1	5.69081e-10	0.0344321	0.165	0.113	1.14317e-05	ENSMUSG00000027998
Mpv17	5.73174e-10	0.0327511	0.212	0.151	1.15139e-05	ENSMUSG00000107283
Cnpy2	5.78448e-10	0.0190078	0.275	0.2	1.16199e-05	ENSMUSG00000025381
Stard3nl	5.79413e-10	0.0251702	0.304	0.225	1.16393e-05	ENSMUSG00000003062
Sptbn1	5.80842e-10	0.0541755	0.559	0.428	1.1668e-05	ENSMUSG00000020315
Gabarapl1	5.85915e-10	0.030856	0.162	0.111	1.17699e-05	ENSMUSG00000030161
Nudcd3	5.90205e-10	0.0232977	0.166	0.113	1.1856e-05	ENSMUSG00000053838
Tecr	5.91493e-10	0.0181378	0.244	0.175	1.18819e-05	ENSMUSG00000031708
Asb8	5.98378e-10	0.0225592	0.091	0.055	1.20202e-05	ENSMUSG00000048175
Txndc12	6.00259e-10	0.03034	0.194	0.137	1.2058e-05	ENSMUSG00000028567
G3bp1	6.07955e-10	0.0254723	0.358	0.267	1.22126e-05	ENSMUSG00000018583
Mrps15	6.11353e-10	0.0297396	0.107	0.067	1.22809e-05	ENSMUSG00000028861
Slc39a13	6.15455e-10	0.0325649	0.136	0.09	1.23633e-05	ENSMUSG00000002105
Ivns1abp	6.35504e-10	0.0254248	0.114	0.073	1.2766e-05	ENSMUSG00000023150
Gstp1	6.3561e-10	0.0349414	0.673	0.535	1.27681e-05	ENSMUSG00000060803
Mfsd5	6.36081e-10	0.0335898	0.12	0.077	1.27776e-05	ENSMUSG00000045665
Prorsd1	6.37309e-10	0.0334536	0.112	0.071	1.28023e-05	ENSMUSG00000032673
2610507B11Rik	6.37397e-10	0.0380327	0.296	0.219	1.2804e-05	ENSMUSG00000010277
Mipep	6.47789e-10	0.0289588	0.071	0.04	1.30128e-05	ENSMUSG00000021993
Pet100	6.51179e-10	0.0314116	0.105	0.066	1.30809e-05	ENSMUSG00000087687
Hist1h2ah	6.59729e-10	-0.0141426	0.01	0.026	1.32526e-05	ENSMUSG00000069302
Hist1h2ad	6.59729e-10	-0.0141426	0.01	0.026	1.32526e-05	ENSMUSG00000071478
Srxn1	6.6216e-10	0.0308566	0.075	0.042	1.33015e-05	ENSMUSG00000032802
Tsc22d1	6.73882e-10	0.0609574	0.583	0.448	1.35369e-05	ENSMUSG00000022010
Ube2v1	6.76616e-10	0.0121767	0.228	0.164	1.35919e-05	ENSMUSG00000078923
Pitpnc1	6.96479e-10	0.0367657	0.122	0.079	1.39909e-05	ENSMUSG00000040430
Zswim6	7.00088e-10	0.036192	0.144	0.097	1.40634e-05	ENSMUSG00000032846
Hmox1	7.01023e-10	0.0339021	0.093	0.057	1.40821e-05	ENSMUSG00000005413
Scap	7.05741e-10	0.0273774	0.107	0.067	1.41769e-05	ENSMUSG00000032485
Adipor1	7.10945e-10	0.0202002	0.216	0.153	1.42815e-05	ENSMUSG00000026457
Slc39a9	7.25065e-10	0.0426764	0.134	0.09	1.45651e-05	ENSMUSG00000048833
Phf5a	7.31003e-10	0.0267768	0.178	0.123	1.46844e-05	ENSMUSG00000061360
Clcn7	7.34141e-10	0.0238539	0.102	0.063	1.47474e-05	ENSMUSG00000036636
Dnajc19	7.36998e-10	0.0106899	0.191	0.134	1.48048e-05	ENSMUSG00000027679
Atg101	7.39026e-10	0.0316126	0.059	0.031	1.48455e-05	ENSMUSG00000037204
Uqcrc2	7.40473e-10	0.0174056	0.262	0.19	1.48746e-05	ENSMUSG00000030884
Chl1	7.49761e-10	-0.17447	0.183	0.22	1.50612e-05	ENSMUSG00000030077
Hip1	7.53123e-10	0.0311586	0.159	0.108	1.51287e-05	ENSMUSG00000039959
Gpsm3	7.53643e-10	0.0285148	0.141	0.094	1.51392e-05	ENSMUSG00000034786
Psma7	7.65614e-10	0.028614	0.341	0.254	1.53796e-05	ENSMUSG00000027566
Hrct1	7.77863e-10	0.0311646	0.035	0.014	1.56257e-05	ENSMUSG00000071001
Nabp2	7.8273e-10	0.0220468	0.19	0.133	1.57235e-05	ENSMUSG00000025374
Vezt	7.89798e-10	0.0327697	0.188	0.132	1.58655e-05	ENSMUSG00000036099
Eml1	7.95494e-10	0.0245192	0.073	0.041	1.59799e-05	ENSMUSG00000058070
Ppp1r14b	8.05532e-10	0.0242525	0.162	0.112	1.61815e-05	ENSMUSG00000056612
Rbms1	8.24061e-10	-0.079766	0.8	0.726	1.65537e-05	ENSMUSG00000026970
Plekhh2	8.29846e-10	0.0250481	0.264	0.192	1.66699e-05	ENSMUSG00000040852
Rnf19b	8.37357e-10	0.033582	0.128	0.084	1.68208e-05	ENSMUSG00000028793
Ddt	8.63836e-10	0.024896	0.13	0.086	1.73527e-05	ENSMUSG00000001666
Gipc1	8.66474e-10	0.0274188	0.034	0.013	1.74057e-05	ENSMUSG00000019433
Trrap	8.67993e-10	0.0412394	0.113	0.073	1.74362e-05	ENSMUSG00000045482
Nop10	8.68462e-10	0.0254704	0.345	0.256	1.74457e-05	ENSMUSG00000027133
Hfe	8.71999e-10	0.0221817	0.26	0.19	1.75167e-05	ENSMUSG00000006611
Ddr1	8.73912e-10	0.0301564	0.2	0.142	1.75552e-05	ENSMUSG00000003534
Tmem38b	8.96357e-10	0.0345107	0.092	0.056	1.8006e-05	ENSMUSG00000028420
Smad3	9.2528e-10	0.0294108	0.063	0.034	1.8587e-05	ENSMUSG00000032402
Zbp1	9.27757e-10	0.0363513	0.08	0.047	1.86368e-05	ENSMUSG00000027514
Slirp	9.32575e-10	0.0251068	0.243	0.177	1.87336e-05	ENSMUSG00000021040
Atp5k	9.34191e-10	0.0386206	0.45	0.34	1.8766e-05	ENSMUSG00000050856
Afap1	9.44466e-10	0.0280481	0.135	0.089	1.89724e-05	ENSMUSG00000029094
Tnk2	9.55711e-10	0.0283235	0.063	0.034	1.91983e-05	ENSMUSG00000022791
Lgals9	9.6065e-10	0.020043	0.23	0.165	1.92975e-05	ENSMUSG00000001123
Rpl36	9.63547e-10	0.0023538	0.299	0.223	1.93557e-05	ENSMUSG00000057863
Frmd8	9.69071e-10	0.0296943	0.069	0.039	1.94667e-05	ENSMUSG00000024816
Stim2	9.71201e-10	0.035152	0.08	0.047	1.95095e-05	ENSMUSG00000039156
Npr1	9.86624e-10	0.0467261	0.1	0.063	1.98193e-05	ENSMUSG00000027931
Cyhr1	9.89589e-10	0.0266686	0.235	0.169	1.98789e-05	ENSMUSG00000053929
Vps25	1.00704e-09	-0.00338887	0.259	0.187	2.02295e-05	ENSMUSG00000078656
Sdha	1.00752e-09	0.0207556	0.282	0.208	2.02391e-05	ENSMUSG00000021577
Rasa4	1.0178e-09	0.0295453	0.069	0.038	2.04456e-05	ENSMUSG00000004952
Tmem150a	1.01869e-09	0.0321587	0.094	0.058	2.04635e-05	ENSMUSG00000055912
Col9a2	1.0188e-09	0.0457434	0.074	0.043	2.04658e-05	ENSMUSG00000028626
Eid1	1.02164e-09	-0.147158	0.513	0.493	2.05228e-05	ENSMUSG00000091337
Ttyh3	1.0243e-09	0.0371186	0.26	0.192	2.0576e-05	ENSMUSG00000036565
Slc27a4	1.02999e-09	0.0395031	0.081	0.048	2.06904e-05	ENSMUSG00000059316
Pdlim1	1.03217e-09	0.026996	0.213	0.152	2.07341e-05	ENSMUSG00000055044
Atp6v0d1	1.04071e-09	0.0158483	0.157	0.107	2.09058e-05	ENSMUSG00000013160
Faf2	1.04563e-09	0.0246177	0.157	0.107	2.10047e-05	ENSMUSG00000025873
Gm28043	1.04785e-09	0.00941189	0.087	0.052	2.10491e-05	ENSMUSG00000098374
Gpaa1	1.05029e-09	0.0339371	0.131	0.086	2.10982e-05	ENSMUSG00000022561
Tmem161a	1.05222e-09	0.0321126	0.073	0.042	2.11371e-05	ENSMUSG00000002342
Cd1d1	1.05266e-09	0.0304448	0.488	0.37	2.11458e-05	ENSMUSG00000028076
Lpcat3	1.05681e-09	0.0248041	0.205	0.145	2.12291e-05	ENSMUSG00000004270
Enpp4	1.07169e-09	0.0460134	0.515	0.391	2.15282e-05	ENSMUSG00000023961
Cox17	1.08633e-09	0.00173928	0.307	0.229	2.18221e-05	ENSMUSG00000046516
Ifitm2	1.10045e-09	-0.0976221	0.759	0.691	2.21058e-05	ENSMUSG00000060591
Reep4	1.10087e-09	0.0269256	0.055	0.028	2.21144e-05	ENSMUSG00000033589
Heph	1.11032e-09	0.0241711	0.152	0.104	2.23041e-05	ENSMUSG00000031209
Hist1h2ak	1.11682e-09	-0.00678827	0.004	0.015	2.24347e-05	ENSMUSG00000063021
Sec61b	1.14519e-09	0.0236549	0.356	0.268	2.30045e-05	ENSMUSG00000053317
Ifit1	1.14683e-09	0.0348742	0.131	0.087	2.30375e-05	ENSMUSG00000034459
Sult1a1	1.15763e-09	0.027658	0.23	0.166	2.32545e-05	ENSMUSG00000030711
Dcaf6	1.16952e-09	0.0226608	0.134	0.089	2.34933e-05	ENSMUSG00000026571
Emc3	1.17822e-09	0.0314555	0.171	0.119	2.3668e-05	ENSMUSG00000030286
U2af1l4.1	1.22327e-09	0.0122236	0.106	0.067	2.4573e-05	NA
Podn	1.22626e-09	0.0392123	0.191	0.136	2.4633e-05	ENSMUSG00000028600
Sh3glb2	1.23289e-09	0.0314159	0.045	0.021	2.47664e-05	ENSMUSG00000026860
Haus3	1.24322e-09	0.0435498	0.11	0.071	2.49739e-05	ENSMUSG00000079555
Gm20431	1.24879e-09	0.0107366	0.218	0.157	2.50857e-05	ENSMUSG00000089739
Arfgap1	1.28485e-09	0.0263552	0.092	0.057	2.58101e-05	ENSMUSG00000027575
Sccpdh	1.28662e-09	0.0264193	0.089	0.053	2.58457e-05	ENSMUSG00000038936
Eno1	1.29063e-09	0.00180991	0.247	0.179	2.59261e-05	ENSMUSG00000063524
Creb3l2	1.29721e-09	0.0189509	0.24	0.174	2.60583e-05	ENSMUSG00000038648
Il11ra1	1.34159e-09	0.0438572	0.194	0.14	2.69498e-05	ENSMUSG00000073889
Lman1	1.3488e-09	0.0193624	0.413	0.31	2.70946e-05	ENSMUSG00000041891
Mrpl18	1.3544e-09	0.0166275	0.236	0.17	2.72073e-05	ENSMUSG00000057388
H2-T10	1.38881e-09	0.0330297	0.073	0.042	2.78984e-05	ENSMUSG00000079491
Klc1	1.39429e-09	0.00858195	0.145	0.097	2.80085e-05	ENSMUSG00000021288
Ncln	1.40541e-09	0.0296209	0.067	0.037	2.82319e-05	ENSMUSG00000020238
Mocs2	1.42582e-09	0.0242102	0.285	0.21	2.86418e-05	ENSMUSG00000015536
Atp5f1	1.44207e-09	0.017725	0.379	0.283	2.89683e-05	ENSMUSG00000000563
Ndufb2	1.46661e-09	0.00829921	0.214	0.151	2.94612e-05	ENSMUSG00000002416
Mfap2	1.46814e-09	0.0230223	0.146	0.099	2.9492e-05	ENSMUSG00000060572
Ugdh	1.47153e-09	0.0197778	0.204	0.145	2.95601e-05	ENSMUSG00000029201
Usp50	1.48589e-09	0.0167596	0.138	0.093	2.98486e-05	ENSMUSG00000027364
Lysmd2	1.49149e-09	0.0331055	0.152	0.105	2.9961e-05	ENSMUSG00000032184
Golga5	1.51314e-09	0.0254766	0.11	0.07	3.0396e-05	ENSMUSG00000021192
Eml3	1.51484e-09	0.0350616	0.151	0.103	3.04301e-05	ENSMUSG00000071647
Acot9	1.5166e-09	0.0314728	0.066	0.037	3.04654e-05	ENSMUSG00000025287
Gosr2	1.52035e-09	0.0310355	0.173	0.12	3.05407e-05	ENSMUSG00000020946
Pqlc2	1.52429e-09	0.0203663	0.034	0.014	3.06199e-05	ENSMUSG00000028744
Tpi1	1.52658e-09	0.0297957	0.192	0.136	3.0666e-05	ENSMUSG00000023456
Cd276	1.53322e-09	0.033171	0.074	0.042	3.07993e-05	ENSMUSG00000035914
Plekha2	1.54615e-09	0.0213455	0.208	0.148	3.1059e-05	ENSMUSG00000031557
Lrp4	1.57461e-09	0.0296924	0.107	0.068	3.16308e-05	ENSMUSG00000027253
Glul	1.58917e-09	-0.141407	0.6	0.567	3.19233e-05	ENSMUSG00000026473
Flt3l	1.58972e-09	0.0372715	0.108	0.069	3.19342e-05	ENSMUSG00000110206
Ahnak	1.62057e-09	0.0828737	0.779	0.619	3.2554e-05	ENSMUSG00000069833
Mrpl24	1.63063e-09	0.0191724	0.234	0.169	3.27561e-05	ENSMUSG00000019710
Hist1h2ai	1.65287e-09	-0.0135416	0.01	0.026	3.32029e-05	ENSMUSG00000071516
Pigq	1.65951e-09	0.030547	0.128	0.084	3.33362e-05	ENSMUSG00000025728
Aagab	1.6602e-09	0.0254394	0.076	0.044	3.33501e-05	ENSMUSG00000037257
Atp5b	1.69153e-09	0.0255276	0.361	0.27	3.39794e-05	ENSMUSG00000025393
Alg2	1.69158e-09	0.0196725	0.22	0.158	3.39804e-05	ENSMUSG00000039740
Ssbp1	1.70642e-09	0.0210449	0.223	0.161	3.42785e-05	ENSMUSG00000029911
Uvrag	1.71684e-09	0.0250268	0.138	0.092	3.44879e-05	ENSMUSG00000035354
Bscl2	1.7251e-09	0.0190358	0.163	0.113	3.46537e-05	ENSMUSG00000071657
Dctn1	1.72693e-09	0.0217675	0.189	0.133	3.46906e-05	ENSMUSG00000031865
Mrps17	1.75281e-09	0.015948	0.21	0.15	3.52104e-05	ENSMUSG00000034211
Fam114a2	1.75893e-09	0.0286472	0.209	0.149	3.53335e-05	ENSMUSG00000020523
Pttg1ip	1.76759e-09	0.0178267	0.437	0.329	3.55074e-05	ENSMUSG00000009291
Anxa6	1.8025e-09	0.0484652	0.638	0.487	3.62085e-05	ENSMUSG00000018340
Hist1h2aj	1.84624e-09	-0.012498	0.009	0.025	3.70872e-05	ENSMUSG00000080076
Nrg2	1.86405e-09	0.0316039	0.034	0.014	3.74451e-05	ENSMUSG00000060275
Cd99l2	1.86932e-09	0.0237102	0.16	0.11	3.75509e-05	ENSMUSG00000035776
Antxr1	1.9038e-09	-0.0993558	0.7	0.643	3.82436e-05	ENSMUSG00000033420
Tusc2	1.92778e-09	0.0341749	0.077	0.045	3.87252e-05	ENSMUSG00000010054
Sf3b6	1.99001e-09	0.00570427	0.295	0.216	3.99752e-05	ENSMUSG00000037361
Atp6v0a2	1.99607e-09	0.02876	0.171	0.119	4.00971e-05	ENSMUSG00000038023
Glmp	2.01278e-09	0.0192941	0.193	0.137	4.04327e-05	ENSMUSG00000001418
Chkb	2.02422e-09	0.0287991	0.106	0.068	4.06626e-05	ENSMUSG00000022617
Mmp13	2.02911e-09	-0.209572	0.444	0.465	4.07607e-05	ENSMUSG00000050578
Slc43a3	2.06244e-09	0.0350254	0.129	0.086	4.14302e-05	ENSMUSG00000027074
Dcaf8	2.07692e-09	0.0344267	0.245	0.178	4.17211e-05	ENSMUSG00000026554
Tmem261	2.07957e-09	0.0346284	0.147	0.101	4.17745e-05	ENSMUSG00000028398
Gusb	2.09061e-09	0.024347	0.112	0.073	4.19961e-05	ENSMUSG00000025534
B4galt7	2.11324e-09	0.019351	0.103	0.065	4.24507e-05	ENSMUSG00000021504
Chst14	2.13242e-09	0.0279144	0.238	0.174	4.28361e-05	ENSMUSG00000074916
Ptprj	2.13955e-09	0.0334605	0.143	0.097	4.29793e-05	ENSMUSG00000025314
Gpx4	2.22414e-09	0.00242991	0.388	0.297	4.46785e-05	ENSMUSG00000075706
Srp54a	2.2332e-09	-0.00101152	0.315	0.235	4.48605e-05	ENSMUSG00000073079
4931406P16Rik	2.28093e-09	0.0264142	0.21	0.15	4.58193e-05	ENSMUSG00000066571
Mapk3	2.2941e-09	0.0114292	0.214	0.153	4.60838e-05	ENSMUSG00000063065
Ap5s1	2.31502e-09	0.0315279	0.039	0.018	4.65041e-05	ENSMUSG00000068264
Kifc3	2.34756e-09	0.0340563	0.042	0.02	4.71578e-05	ENSMUSG00000031788
Psma2	2.36573e-09	0.0239615	0.428	0.324	4.75227e-05	ENSMUSG00000015671
Alyref	2.36987e-09	0.0358947	0.11	0.072	4.76059e-05	ENSMUSG00000025134
Ehbp1l1	2.39429e-09	0.0459578	0.122	0.081	4.80966e-05	ENSMUSG00000024937
Hprt	2.42135e-09	0.0248011	0.162	0.112	4.86401e-05	ENSMUSG00000025630
Prelid1	2.42607e-09	0.0203859	0.29	0.215	4.87349e-05	ENSMUSG00000021486
Eif4h	2.43602e-09	0.0253066	0.414	0.314	4.89347e-05	ENSMUSG00000040731
Hdac7	2.45108e-09	0.0270305	0.155	0.107	4.92373e-05	ENSMUSG00000022475
Src	2.46016e-09	0.0219206	0.109	0.07	4.94198e-05	ENSMUSG00000027646
Elavl1	2.4654e-09	0.0123205	0.18	0.126	4.9525e-05	ENSMUSG00000040028
Ndufb10	2.47536e-09	0.0129856	0.2	0.142	4.9725e-05	ENSMUSG00000040048
Gba	2.5047e-09	0.0204396	0.132	0.088	5.03145e-05	ENSMUSG00000028048
Micall2	2.51537e-09	0.0305072	0.046	0.023	5.05287e-05	ENSMUSG00000036718
Prr7	2.52008e-09	0.0285572	0.041	0.019	5.06234e-05	ENSMUSG00000034686
Bloc1s1	2.53056e-09	-0.000679965	0.233	0.17	5.08339e-05	ENSMUSG00000090247
Adrm1	2.53804e-09	0.0108541	0.135	0.091	5.09842e-05	ENSMUSG00000039041
Htatip2	2.54431e-09	0.0271794	0.134	0.09	5.111e-05	ENSMUSG00000039745
Ssu72	2.54971e-09	0.0239816	0.131	0.087	5.12185e-05	ENSMUSG00000029038
Cxcl14	2.58151e-09	0.0708365	0.946	0.889	5.18574e-05	ENSMUSG00000021508
Mrgpre	2.59227e-09	0.0261206	0.095	0.059	5.20735e-05	ENSMUSG00000048965
Ecd	2.60585e-09	0.0400347	0.106	0.068	5.23462e-05	ENSMUSG00000021810
Rtca	2.62513e-09	0.0338759	0.11	0.072	5.27336e-05	ENSMUSG00000000339
Pex16	2.62756e-09	0.0142971	0.05	0.025	5.27824e-05	ENSMUSG00000027222
Cnot8	2.63268e-09	0.0215932	0.143	0.097	5.28853e-05	ENSMUSG00000020515
Xrn2	2.68604e-09	0.00891834	0.229	0.165	5.39572e-05	ENSMUSG00000027433
Ern1	2.76854e-09	0.031682	0.068	0.039	5.56145e-05	ENSMUSG00000020715
Adi1	2.77986e-09	0.0273714	0.162	0.112	5.58417e-05	ENSMUSG00000020629
Nipsnap2	2.8952e-09	0.0212222	0.209	0.15	5.81588e-05	ENSMUSG00000029432
Repin1	2.9095e-09	0.0240934	0.09	0.055	5.8446e-05	ENSMUSG00000052751
Tsnax	2.93374e-09	0.0205604	0.154	0.106	5.8933e-05	ENSMUSG00000056820
Npm1	2.96939e-09	-0.166426	0.512	0.491	5.96491e-05	ENSMUSG00000057113
Dgat1	2.98206e-09	0.024844	0.07	0.04	5.99037e-05	ENSMUSG00000022555
Sdf2l1	2.98705e-09	0.0244939	0.16	0.111	6.00039e-05	ENSMUSG00000022769
Atp13a3	2.9885e-09	0.018751	0.264	0.194	6.00329e-05	ENSMUSG00000022533
Prrg3	3.03206e-09	0.0315069	0.08	0.048	6.09081e-05	ENSMUSG00000033361
Prrx1	3.06409e-09	-0.160127	0.487	0.471	6.15514e-05	ENSMUSG00000026586
D10Jhu81e	3.10072e-09	0.0105619	0.226	0.163	6.22874e-05	ENSMUSG00000053329
Tgfbi	3.10784e-09	0.0521125	0.06	0.033	6.24302e-05	ENSMUSG00000035493
Dctn2	3.1767e-09	0.0241914	0.197	0.141	6.38136e-05	ENSMUSG00000025410
Nkd1	3.24369e-09	0.0326983	0.061	0.033	6.51593e-05	ENSMUSG00000031661
Psmb7	3.24556e-09	0.00557819	0.2	0.142	6.51969e-05	ENSMUSG00000026750
Plin2	3.25728e-09	0.0288342	0.061	0.034	6.54322e-05	ENSMUSG00000028494
Gpat4	3.29334e-09	0.0275153	0.221	0.16	6.61566e-05	ENSMUSG00000031545
Fst	3.32217e-09	0.0736878	0.695	0.561	6.67358e-05	ENSMUSG00000021765
Bop1	3.32947e-09	0.026226	0.076	0.045	6.68823e-05	ENSMUSG00000022557
Ermap	3.33604e-09	-0.0292323	0.001	0.01	6.70144e-05	ENSMUSG00000028644
Pdia4	3.39165e-09	0.021381	0.351	0.263	6.81315e-05	ENSMUSG00000025823
Gm3375	3.42005e-09	0.0159592	0.093	0.058	6.87019e-05	ENSMUSG00000107470
Taf5l	3.4787e-09	0.0242	0.067	0.037	6.98801e-05	ENSMUSG00000038697
Snhg8	3.48804e-09	0.0186972	0.135	0.091	7.00678e-05	ENSMUSG00000104960
Mrps30	3.53618e-09	0.0173658	0.103	0.066	7.10348e-05	ENSMUSG00000021731
Sgpl1	3.56329e-09	0.0210883	0.276	0.203	7.15793e-05	ENSMUSG00000020097
Rora	3.67011e-09	0.0366642	0.219	0.16	7.37253e-05	ENSMUSG00000032238
Dmwd	3.70102e-09	0.0258121	0.125	0.083	7.43461e-05	ENSMUSG00000030410
2002-03-01	3.71996e-09	0.0239203	0.212	0.152	7.47265e-05	ENSMUSG00000073481
Parl	3.74824e-09	0.0228815	0.13	0.087	7.52946e-05	ENSMUSG00000033918
Gm29253	3.75177e-09	0.0271895	0.078	0.047	7.53655e-05	ENSMUSG00000099519
Ranbp9	3.79727e-09	0.0328526	0.148	0.102	7.62796e-05	ENSMUSG00000038546
Nsrp1	3.81189e-09	0.0319057	0.134	0.091	7.65732e-05	ENSMUSG00000037958
Synpo	3.85936e-09	0.0207337	0.184	0.13	7.75269e-05	ENSMUSG00000043079
Idi1	3.87098e-09	0.024139	0.037	0.017	7.77603e-05	ENSMUSG00000058258
Armc10	3.87363e-09	0.0335955	0.07	0.04	7.78135e-05	ENSMUSG00000038525
Ralb	3.89416e-09	0.0272223	0.188	0.134	7.82258e-05	ENSMUSG00000004451
Hmg20b	3.89562e-09	0.0329507	0.106	0.069	7.82551e-05	ENSMUSG00000020232
Sdc2	3.92012e-09	-0.111807	0.637	0.588	7.87473e-05	ENSMUSG00000022261
Fkbp15	4.02002e-09	0.0319263	0.103	0.066	8.07542e-05	ENSMUSG00000066151
Rab20	4.03631e-09	0.0308971	0.052	0.027	8.10815e-05	ENSMUSG00000031504
Cxx1a	4.1051e-09	0.0338362	0.516	0.412	8.24633e-05	ENSMUSG00000067925
Eif2s2	4.12496e-09	0.0283727	0.479	0.37	8.28622e-05	ENSMUSG00000074656
Napepld	4.13087e-09	0.0269976	0.037	0.017	8.29809e-05	ENSMUSG00000044968
Tubb5	4.38325e-09	0.0152602	0.299	0.222	8.80506e-05	ENSMUSG00000001525
Bcap31	4.3936e-09	0.0251453	0.259	0.191	8.82586e-05	ENSMUSG00000002015
Wdfy3	4.48222e-09	0.0296226	0.142	0.097	9.00389e-05	ENSMUSG00000043940
Nlrc5	4.52894e-09	0.0295515	0.103	0.066	9.09773e-05	ENSMUSG00000074151
Hsd17b11	4.54097e-09	0.0287632	0.437	0.335	9.1219e-05	ENSMUSG00000029311
Ephb4	4.55556e-09	0.0160284	0.142	0.096	9.15121e-05	ENSMUSG00000029710
Ndufb3	4.57607e-09	0.0134154	0.282	0.209	9.19241e-05	ENSMUSG00000026032
Plcb3	4.6092e-09	0.0271084	0.086	0.053	9.25896e-05	ENSMUSG00000024960
Rplp1	4.61212e-09	-0.100404	0.769	0.698	9.26484e-05	ENSMUSG00000007892
Trir	4.71661e-09	0.0162342	0.33	0.246	9.47473e-05	ENSMUSG00000041203
Ephx1	4.73704e-09	0.018617	0.326	0.244	9.51576e-05	ENSMUSG00000038776
Smim12	4.75266e-09	0.0352487	0.112	0.074	9.54715e-05	ENSMUSG00000042380
Fam162a	4.78083e-09	0.0212622	0.166	0.115	9.60373e-05	ENSMUSG00000003955
Letm1	4.79266e-09	0.0433551	0.102	0.066	9.6275e-05	ENSMUSG00000005299
Atraid	4.87624e-09	0.0108678	0.252	0.184	9.79539e-05	ENSMUSG00000013622
Pigx	5.00218e-09	0.0227103	0.14	0.095	0.000100484	ENSMUSG00000023791
Rbpms2	5.09138e-09	0.0306626	0.047	0.024	0.000102276	ENSMUSG00000032387
Abca1	5.19138e-09	0.0308667	0.192	0.138	0.000104285	ENSMUSG00000015243
Csk	5.25049e-09	0.0257092	0.139	0.095	0.000105472	ENSMUSG00000032312
Sqstm1	5.2642e-09	0.0388874	0.524	0.405	0.000105747	ENSMUSG00000015837
Eif4a3	5.28951e-09	0.0232722	0.164	0.115	0.000106256	ENSMUSG00000025580
Tmem203	5.31469e-09	0.030494	0.074	0.043	0.000106761	ENSMUSG00000078201
Gm9774	5.38096e-09	0.0121643	0.119	0.078	0.000108093	ENSMUSG00000042165
Washc2	5.3938e-09	0.0220488	0.194	0.138	0.000108351	ENSMUSG00000024104
Actr10	5.46296e-09	0.0131265	0.256	0.188	0.00010974	ENSMUSG00000021076
Aldh3a2	5.48445e-09	0.0221014	0.171	0.12	0.000110172	ENSMUSG00000010025
Srf	5.49921e-09	0.031614	0.059	0.033	0.000110468	ENSMUSG00000015605
Mlec	5.57191e-09	0.0163746	0.382	0.289	0.000111929	ENSMUSG00000048578
Tm9sf1	5.5775e-09	0.0111327	0.474	0.364	0.000112041	ENSMUSG00000002320
Fdps	5.74606e-09	0.0225511	0.032	0.013	0.000115427	ENSMUSG00000059743
Cox5b	5.81291e-09	0.000562864	0.24	0.176	0.00011677	ENSMUSG00000061518
Cx3cl1	5.81986e-09	0.0243701	0.24	0.176	0.000116909	ENSMUSG00000031778
Ptpmt1	5.84891e-09	0.0263608	0.112	0.074	0.000117493	ENSMUSG00000063235
Ak6	5.87747e-09	-0.00652013	0.215	0.156	0.000118067	ENSMUSG00000078941
Glrx3	5.88874e-09	0.0216462	0.233	0.172	0.000118293	ENSMUSG00000031068
Yif1a	5.91116e-09	0.0193061	0.161	0.112	0.000118743	ENSMUSG00000024875
Arhgef17	5.95219e-09	0.0236634	0.157	0.109	0.000119568	ENSMUSG00000032875
Myl6	5.99672e-09	0.0680468	0.747	0.616	0.000120462	ENSMUSG00000090841
Gtf2ird1	6.07324e-09	0.0228652	0.119	0.079	0.000121999	ENSMUSG00000023079
Fblim1	6.08147e-09	0.022564	0.068	0.039	0.000122165	ENSMUSG00000006219
Spag7	6.09177e-09	0.0248305	0.151	0.104	0.000122372	ENSMUSG00000018287
Btf3l4	6.12241e-09	0.000745766	0.192	0.137	0.000122987	ENSMUSG00000028568
Isyna1	6.19617e-09	0.0283148	0.114	0.075	0.000124469	ENSMUSG00000019139
Fmnl3	6.23824e-09	0.0278841	0.124	0.083	0.000125314	ENSMUSG00000023008
Rbm15b	6.27694e-09	0.0276499	0.1	0.064	0.000126091	ENSMUSG00000074102
Ptchd1	6.29733e-09	0.054475	0.17	0.121	0.000126501	ENSMUSG00000041552
Ppdpf	6.41171e-09	0.0123359	0.182	0.129	0.000128798	ENSMUSG00000016344
Col11a2	6.59613e-09	0.01624	0.095	0.06	0.000132503	ENSMUSG00000024330
Cops7b	6.60405e-09	0.0325128	0.064	0.036	0.000132662	ENSMUSG00000026240
Ccl4	6.63396e-09	-0.0230363	0	0.008	0.000133263	ENSMUSG00000018930
Rgs2	6.63527e-09	0.0345489	0.11	0.072	0.000133289	ENSMUSG00000026360
Mrps16	6.64886e-09	0.0285673	0.113	0.074	0.000133562	ENSMUSG00000049960
P3h4	6.65869e-09	0.0178776	0.132	0.089	0.00013376	ENSMUSG00000006931
Gm12504	6.69065e-09	0.0246715	0.025	0.008	0.000134402	ENSMUSG00000084274
Men1	6.72301e-09	0.0168527	0.105	0.067	0.000135052	ENSMUSG00000024947
Gpx7	6.73279e-09	0.0215661	0.109	0.071	0.000135248	ENSMUSG00000028597
Tbl1x	6.73568e-09	0.0266533	0.402	0.304	0.000135306	ENSMUSG00000025246
Pard6g	6.84622e-09	0.027061	0.177	0.126	0.000137527	ENSMUSG00000056214
Hebp1	6.89354e-09	0.0259909	0.094	0.059	0.000138478	ENSMUSG00000042770
Mtx2	6.90909e-09	0.0348601	0.102	0.066	0.00013879	ENSMUSG00000027099
Slc18b1	6.99607e-09	0.0347929	0.085	0.053	0.000140537	ENSMUSG00000037455
Ercc4	7.00877e-09	0.0270398	0.04	0.019	0.000140792	ENSMUSG00000022545
Chst15	7.0275e-09	0.0399315	0.478	0.37	0.000141168	ENSMUSG00000030930
Mfap3	7.12196e-09	0.01091	0.195	0.139	0.000143066	ENSMUSG00000020522
BTF3L4	7.19446e-09	0.0127492	0.144	0.099	0.000144522	ENSMUSG00000114133
Tmem50b	7.34388e-09	0.0130815	0.17	0.119	0.000147524	ENSMUSG00000022964
Psmb1	7.35152e-09	0.0419082	0.513	0.393	0.000147677	ENSMUSG00000014769
Fbxo18	7.39859e-09	0.026372	0.091	0.057	0.000148623	ENSMUSG00000058594
Rpap1	7.43026e-09	0.0279572	0.033	0.014	0.000149259	ENSMUSG00000034032
Dnajc5	7.49774e-09	0.00937684	0.315	0.234	0.000150615	ENSMUSG00000000826
Rab23	7.59104e-09	0.0336384	0.132	0.09	0.000152489	ENSMUSG00000004768
Trim35	7.68861e-09	0.0091382	0.287	0.212	0.000154449	ENSMUSG00000022043
Gpr137	7.69097e-09	0.0254073	0.13	0.088	0.000154496	ENSMUSG00000024958
Ubb	7.69961e-09	-0.0589578	0.936	0.912	0.00015467	ENSMUSG00000019505
Snrpf	7.78884e-09	0.00740518	0.227	0.167	0.000156462	ENSMUSG00000020018
Gpr108	7.82954e-09	0.0420221	0.126	0.085	0.00015728	ENSMUSG00000005823
Mylk	8.00528e-09	0.0998392	0.853	0.72	0.00016081	ENSMUSG00000022836
Eif4e2	8.03113e-09	0.0200723	0.138	0.094	0.000161329	ENSMUSG00000026254
Ube2d3	8.2073e-09	0.0055807	0.341	0.255	0.000164868	ENSMUSG00000078578
Dlx5	8.28739e-09	0.0245775	0.358	0.273	0.000166477	ENSMUSG00000029755
Adh5	8.28844e-09	0.0252972	0.162	0.114	0.000166498	ENSMUSG00000028138
Glo1	8.37486e-09	0.0213203	0.11	0.072	0.000168234	ENSMUSG00000024026
Cops7a	8.54003e-09	0.0138634	0.269	0.198	0.000171552	ENSMUSG00000030127
Arhgap1	8.66339e-09	0.0260828	0.168	0.119	0.00017403	ENSMUSG00000027247
Wnt11	8.78778e-09	0.0293602	0.03	0.012	0.000176529	ENSMUSG00000015957
Slc26a11	8.80919e-09	0.0286092	0.05	0.026	0.000176959	ENSMUSG00000039908
Tmem126a	8.82434e-09	0.02448	0.155	0.108	0.000177263	ENSMUSG00000030615
Atg13	8.99318e-09	0.0188835	0.087	0.053	0.000180655	ENSMUSG00000027244
Txlna	9.00356e-09	0.0300987	0.207	0.15	0.000180864	ENSMUSG00000053841
Lrrc59	9.09084e-09	0.00597611	0.193	0.137	0.000182617	ENSMUSG00000020869
Gm10076	9.10985e-09	-0.134146	0.716	0.698	0.000182999	ENSMUSG00000060143
Nat6	9.18135e-09	0.0187516	0.138	0.095	0.000184435	ENSMUSG00000079334
Panx1	9.34227e-09	0.0201202	0.116	0.077	0.000187668	ENSMUSG00000031934
Ago2	9.41652e-09	0.0359151	0.134	0.092	0.000189159	ENSMUSG00000036698
Rab12	9.46476e-09	0.0169871	0.275	0.204	0.000190128	ENSMUSG00000023460
Pgk1	9.49144e-09	0.0263803	0.18	0.128	0.000190664	ENSMUSG00000062070
Wnt5a	9.53588e-09	0.0248762	0.074	0.043	0.000191557	ENSMUSG00000021994
Fhl3	9.64609e-09	0.0214022	0.026	0.01	0.000193771	ENSMUSG00000032643
Gspt2	9.76207e-09	0.0287375	0.045	0.022	0.000196101	ENSMUSG00000071723
Becn1	9.77412e-09	0.00931917	0.145	0.1	0.000196342	ENSMUSG00000035086
Zcrb1	9.81962e-09	0.00736064	0.239	0.175	0.000197257	ENSMUSG00000022635
Trappc2l	9.89007e-09	0.022203	0.221	0.161	0.000198672	ENSMUSG00000015013
Lrp5	9.96906e-09	0.0251348	0.15	0.104	0.000200258	ENSMUSG00000024913
Rhoq	1.01017e-08	0.0371904	0.267	0.2	0.000202923	ENSMUSG00000024143
Emc1	1.01119e-08	0.0220201	0.116	0.077	0.000203127	ENSMUSG00000078517
Ube2m	1.0119e-08	0.0260767	0.123	0.083	0.000203271	ENSMUSG00000005575
Cuedc2	1.02105e-08	0.0101903	0.107	0.07	0.000205109	ENSMUSG00000036748
Marveld1	1.03085e-08	0.0210878	0.12	0.08	0.000207077	ENSMUSG00000044345
Tjap1	1.03217e-08	0.0278833	0.093	0.059	0.000207341	ENSMUSG00000012296
Rabl6	1.03514e-08	0.0245741	0.131	0.089	0.000207939	ENSMUSG00000015087
Usb1	1.0503e-08	0.0254496	0.044	0.022	0.000210984	ENSMUSG00000031792
Polr1d	1.07673e-08	0.0183785	0.31	0.232	0.000216293	ENSMUSG00000029642
Psmd3	1.07942e-08	0.0239577	0.126	0.085	0.000216834	ENSMUSG00000017221
Rnf149	1.08473e-08	0.00486024	0.202	0.147	0.000217901	ENSMUSG00000048234
Gramd4	1.0856e-08	0.036076	0.09	0.057	0.000218076	ENSMUSG00000035900
Thoc6	1.08714e-08	0.0333814	0.058	0.032	0.000218384	ENSMUSG00000041319
Tmed2	1.08798e-08	0.0384344	0.498	0.383	0.000218553	ENSMUSG00000029390
Pid1	1.08948e-08	0.0256395	0.214	0.156	0.000218855	ENSMUSG00000045658
Ubl3	1.0941e-08	0.0080282	0.294	0.22	0.000219783	ENSMUSG00000001687
Ndufa13	1.09426e-08	0.0246661	0.272	0.203	0.000219814	ENSMUSG00000036199
Fermt2	1.09787e-08	0.0448187	0.537	0.417	0.00022054	ENSMUSG00000037712
Ubfd1	1.11002e-08	0.0271149	0.131	0.089	0.000222981	ENSMUSG00000030870
Mnat1	1.11471e-08	0.0178766	0.219	0.159	0.000223924	ENSMUSG00000021103
Gm20390	1.13732e-08	0.00372505	0.424	0.327	0.000228464	ENSMUSG00000091228
Itpr1	1.15868e-08	0.0305416	0.166	0.117	0.000232755	ENSMUSG00000030102
Tmem216	1.15967e-08	0.0306582	0.1	0.064	0.000232955	ENSMUSG00000024667
Tmem160	1.16661e-08	0.0188674	0.151	0.105	0.000234349	ENSMUSG00000019158
Vstm4	1.17018e-08	0.0202675	0.201	0.145	0.000235066	ENSMUSG00000050666
Srm	1.17019e-08	0.0273754	0.053	0.029	0.000235067	ENSMUSG00000006442
Isoc2a	1.1795e-08	0.0271831	0.065	0.037	0.000236939	ENSMUSG00000086784
Rsph3b	1.18265e-08	0.0106035	0.096	0.061	0.000237571	ENSMUSG00000023806
Cdca4	1.18431e-08	0.0255157	0.104	0.067	0.000237903	ENSMUSG00000047832
Fam20b	1.18867e-08	0.0144983	0.201	0.145	0.00023878	ENSMUSG00000033557
Mtmr2	1.19883e-08	0.0240909	0.124	0.083	0.000240821	ENSMUSG00000031918
Cct3	1.20334e-08	0.0131055	0.166	0.117	0.000241726	ENSMUSG00000001416
Tmed1	1.20379e-08	0.0269313	0.118	0.079	0.000241818	ENSMUSG00000032180
Tmem63a	1.20399e-08	0.0309105	0.079	0.048	0.000241857	ENSMUSG00000026519
Rnf215	1.24843e-08	0.0181671	0.112	0.074	0.000250785	ENSMUSG00000003581
Fam168a	1.26148e-08	0.0240832	0.267	0.2	0.000253407	ENSMUSG00000029461
Mocs1	1.26337e-08	0.0186892	0.21	0.152	0.000253785	ENSMUSG00000064120
Rpia	1.26906e-08	0.0314374	0.084	0.052	0.000254929	ENSMUSG00000053604
Psmd7	1.28352e-08	0.0137956	0.369	0.28	0.000257833	ENSMUSG00000039067
Slc40a1	1.29368e-08	0.0372769	0.357	0.274	0.000259874	ENSMUSG00000025993
Phactr1	1.31436e-08	0.0261828	0.338	0.258	0.00026403	ENSMUSG00000054728
Wdr82	1.3324e-08	0.0179785	0.175	0.124	0.000267652	ENSMUSG00000020257
52319	1.34696e-08	0.0254912	0.043	0.021	0.000270577	NA
Nsf	1.35399e-08	0.0200978	0.184	0.132	0.000271989	ENSMUSG00000034187
Acsl1	1.36517e-08	0.0247425	0.058	0.032	0.000274235	ENSMUSG00000018796
1110008F13Rik	1.36884e-08	0.00648652	0.215	0.155	0.000274973	ENSMUSG00000027637
Ifi35	1.37576e-08	0.0270061	0.112	0.074	0.000276362	ENSMUSG00000010358
Edf1	1.38112e-08	0.0292488	0.438	0.336	0.000277438	ENSMUSG00000015092
Sfswap	1.38866e-08	0.0203644	0.179	0.128	0.000278953	ENSMUSG00000029439
Gm4540	1.39202e-08	0.0103563	0.195	0.141	0.000279629	ENSMUSG00000092072
Ggcx	1.39316e-08	0.0275313	0.128	0.087	0.000279857	ENSMUSG00000053460
Zfp862-ps	1.41144e-08	0.0248149	0.074	0.044	0.000283529	ENSMUSG00000107476
Ccser2	1.42728e-08	0.0135297	0.346	0.26	0.000286712	ENSMUSG00000058690
Rnf187	1.4559e-08	0.00991807	0.24	0.176	0.00029246	ENSMUSG00000020496
Myl12a	1.46257e-08	0.0623737	0.69	0.545	0.000293801	ENSMUSG00000024048
Arfgef2	1.47183e-08	0.0102674	0.188	0.134	0.00029566	ENSMUSG00000074582
Tprgl	1.47373e-08	0.00183891	0.3	0.222	0.000296043	ENSMUSG00000029030
Elk4	1.48052e-08	0.0375597	0.123	0.083	0.000297406	ENSMUSG00000026436
Acly	1.486e-08	0.0232986	0.133	0.091	0.000298508	ENSMUSG00000020917
Sin3b	1.50888e-08	0.0178074	0.151	0.105	0.000303103	ENSMUSG00000031622
Rps16	1.54839e-08	-0.110278	0.756	0.703	0.00031104	ENSMUSG00000037563
Rnf14	1.55005e-08	0.01436	0.239	0.176	0.000311374	ENSMUSG00000060450
Cops5	1.56133e-08	0.0165477	0.152	0.106	0.000313641	ENSMUSG00000025917
Gm10053	1.56204e-08	0.0109645	0.133	0.091	0.000313782	ENSMUSG00000058927
Kng2	1.61446e-08	0.0828369	0.736	0.605	0.000324313	ENSMUSG00000060459
Rwdd1	1.63005e-08	0.0058493	0.249	0.187	0.000327445	ENSMUSG00000019782
Nme2	1.64138e-08	0.00188164	0.42	0.324	0.000329721	ENSMUSG00000020857
Cp	1.64797e-08	-0.0317426	0.97	0.93	0.000331044	ENSMUSG00000003617
Tgif1	1.65591e-08	0.0232967	0.103	0.067	0.000332639	ENSMUSG00000047407
Gm11353	1.65708e-08	-0.0898488	0.135	0.174	0.000332874	ENSMUSG00000060198
Uqcrc1	1.69658e-08	0.0188263	0.149	0.104	0.000340809	ENSMUSG00000025651
Ikbip	1.70481e-08	0.0245515	0.316	0.24	0.000342463	ENSMUSG00000019975
Ndufb4	1.72064e-08	0.0064387	0.224	0.165	0.000345643	ENSMUSG00000022820
Mfsd10	1.7214e-08	0.0186339	0.138	0.094	0.000345796	ENSMUSG00000001082
Smad4	1.72738e-08	0.026841	0.403	0.308	0.000346997	ENSMUSG00000024515
Dhrs1	1.73191e-08	0.00664996	0.169	0.119	0.000347905	ENSMUSG00000002332
H6pd	1.73546e-08	0.0361035	0.504	0.393	0.000348619	ENSMUSG00000028980
Gm21983	1.75156e-08	0.00818061	0.244	0.181	0.000351853	ENSMUSG00000095538
Tmbim6	1.75994e-08	-0.0435787	0.904	0.828	0.000353537	ENSMUSG00000023010
Slc6a20a	1.78922e-08	-0.0326299	0.006	0.019	0.000359418	ENSMUSG00000036814
Arf1	1.79149e-08	-0.0442779	0.844	0.759	0.000359875	ENSMUSG00000048076
Tmem234	1.79333e-08	0.0229924	0.411	0.315	0.000360244	ENSMUSG00000028797
Abcd1	1.80713e-08	0.0193565	0.089	0.056	0.000363016	ENSMUSG00000031378
Rsph3a	1.81186e-08	0.00925283	0.08	0.049	0.000363966	ENSMUSG00000073471
Plekhf1	1.81737e-08	0.0120453	0.186	0.133	0.000365073	ENSMUSG00000074170
Anxa1	1.83239e-08	0.0426949	0.571	0.441	0.000368091	ENSMUSG00000024659
Tollip	1.83701e-08	0.0302972	0.114	0.076	0.000369018	ENSMUSG00000025139
Tgfbrap1	1.83925e-08	0.015425	0.061	0.034	0.000369468	ENSMUSG00000070939
Spon2	1.86458e-08	0.0246734	0.067	0.039	0.000374557	ENSMUSG00000037379
Helz	1.87826e-08	0.0274484	0.175	0.126	0.000377305	ENSMUSG00000020721
Preb	1.90425e-08	0.0200962	0.11	0.073	0.000382526	ENSMUSG00000045302
Tob1	1.92392e-08	0.0250986	0.108	0.071	0.000386478	ENSMUSG00000037573
Plat	1.926e-08	0.0217778	0.021	0.007	0.000386895	ENSMUSG00000031538
Usp47	1.92986e-08	0.027782	0.123	0.083	0.000387671	ENSMUSG00000059263
Cmc1	1.9444e-08	0.0278892	0.095	0.061	0.000390591	ENSMUSG00000039163
Cds2	1.95522e-08	0.020292	0.155	0.109	0.000392765	ENSMUSG00000058793
Fgf13	1.95556e-08	0.0228296	0.044	0.022	0.000392834	ENSMUSG00000031137
Lpgat1	1.96006e-08	0.0241372	0.313	0.236	0.000393736	ENSMUSG00000026623
Mrpl10	1.9625e-08	0.0307691	0.11	0.073	0.000394228	ENSMUSG00000001445
Bcl10	2.00933e-08	0.027489	0.152	0.107	0.000403634	ENSMUSG00000028191
Pigp	2.03094e-08	0.0067114	0.248	0.185	0.000407976	ENSMUSG00000022940
Tmem129	2.03963e-08	0.0274133	0.066	0.038	0.00040972	ENSMUSG00000019295
Maob	2.05321e-08	-0.17459	0.193	0.223	0.000412448	ENSMUSG00000040147
Lamtor1	2.06293e-08	0.0248368	0.17	0.121	0.000414401	ENSMUSG00000030842
Agpat1	2.07589e-08	0.0208684	0.166	0.117	0.000417005	ENSMUSG00000034254
Ctsl	2.09338e-08	0.0729013	0.782	0.634	0.000420518	ENSMUSG00000021477
Evc2	2.11306e-08	0.0160976	0.106	0.07	0.000424472	ENSMUSG00000050248
Slco1a4	2.11871e-08	-0.0522492	0.011	0.026	0.000425606	ENSMUSG00000030237
Osmr	2.11963e-08	-0.18407	0.235	0.263	0.000425791	ENSMUSG00000022146
Serpinb6a	2.15333e-08	0.013301	0.339	0.256	0.000432561	ENSMUSG00000060147
Cyp4v3	2.15927e-08	0.019626	0.174	0.125	0.000433753	ENSMUSG00000079057
Atxn1	2.15958e-08	0.0356852	0.162	0.115	0.000433816	ENSMUSG00000046876
Ankrd46	2.16262e-08	0.011636	0.165	0.116	0.000434428	ENSMUSG00000048307
Gm15832	2.18221e-08	0.0110763	0.145	0.101	0.000438362	ENSMUSG00000085894
Fez2	2.20664e-08	0.0189257	0.131	0.09	0.00044327	ENSMUSG00000056121
Pik3r4	2.21703e-08	0.0255889	0.068	0.04	0.000445358	ENSMUSG00000032571
Tspan9	2.25066e-08	0.0189551	0.098	0.063	0.000452113	ENSMUSG00000030352
Cdc42bpb	2.2525e-08	0.0311624	0.073	0.044	0.000452482	ENSMUSG00000021279
Sap30l	2.27897e-08	0.0196669	0.151	0.106	0.0004578	ENSMUSG00000020519
Usp22	2.28222e-08	0.0230015	0.135	0.093	0.000458453	ENSMUSG00000042506
Gm20619	2.28541e-08	0.0183444	0.061	0.035	0.000459093	ENSMUSG00000093482
Edem1	2.30391e-08	0.0195293	0.14	0.097	0.000462809	ENSMUSG00000030104
Cant1	2.30448e-08	0.014788	0.149	0.104	0.000462924	ENSMUSG00000025575
Ssrp1	2.31946e-08	0.0145871	0.266	0.198	0.000465934	ENSMUSG00000027067
S100a13	2.32324e-08	0.0267621	0.481	0.37	0.000466693	ENSMUSG00000042312
Adamtsl4	2.32351e-08	0.0296365	0.066	0.039	0.000466747	ENSMUSG00000015850
Hpcal1	2.34564e-08	0.0310465	0.09	0.057	0.000471192	ENSMUSG00000071379
Phlda3	2.36643e-08	0.0170192	0.111	0.074	0.000475368	ENSMUSG00000041801
Atxn10	2.37549e-08	0.0143031	0.314	0.237	0.000477189	ENSMUSG00000016541
Slc31a1	2.39294e-08	0.00798245	0.119	0.08	0.000480694	ENSMUSG00000066150
Vangl1	2.39472e-08	0.0237707	0.131	0.09	0.000481051	ENSMUSG00000027860
Gtf3c2	2.39791e-08	0.0115331	0.153	0.108	0.000481692	ENSMUSG00000106864
Psmb9	2.41996e-08	0.021923	0.17	0.121	0.000486121	ENSMUSG00000096727
P2ry14	2.42494e-08	-0.118332	0.066	0.096	0.000487121	ENSMUSG00000036381
9930012K11Rik	2.47857e-08	0.0263427	0.057	0.032	0.000497895	ENSMUSG00000044551
Reep5	2.48142e-08	0.0379608	0.521	0.399	0.000498467	ENSMUSG00000005873
Flot1	2.48824e-08	0.0159293	0.153	0.107	0.000499837	ENSMUSG00000059714
Mapkap1	2.48851e-08	0.0235281	0.216	0.16	0.000499892	ENSMUSG00000038696
Ube2i	2.61637e-08	0.0070354	0.213	0.157	0.000525576	ENSMUSG00000015120
Foxo1	2.63559e-08	0.0189308	0.176	0.127	0.000529437	ENSMUSG00000044167
Amy1	2.64094e-08	0.0177284	0.298	0.225	0.000530511	ENSMUSG00000074264
Slc35b2	2.65047e-08	0.0238466	0.075	0.045	0.000532426	ENSMUSG00000037089
2610203C20Rik	2.66283e-08	0.0433971	0.07	0.042	0.000534909	ENSMUSG00000074415
Ptprm	2.67557e-08	0.0112101	0.12	0.08	0.000537468	ENSMUSG00000033278
Pde6d	2.67599e-08	0.0210103	0.253	0.188	0.000537552	ENSMUSG00000026239
Srek1ip1	2.71639e-08	0.0208919	0.114	0.076	0.000545668	ENSMUSG00000021716
Rab3gap1	2.72861e-08	0.0116205	0.175	0.126	0.000548124	ENSMUSG00000036104
Rpl17	2.74466e-08	-0.13047	0.735	0.699	0.000551348	ENSMUSG00000062328
Reck	2.75636e-08	0.025038	0.122	0.082	0.000553698	ENSMUSG00000028476
Slc25a23	2.75731e-08	0.0307545	0.056	0.031	0.000553888	ENSMUSG00000046329
Slc8a1	2.76461e-08	0.0266075	0.146	0.102	0.000555355	ENSMUSG00000054640
Usp5	2.7733e-08	0.0225221	0.18	0.13	0.000557101	ENSMUSG00000038429
BC004004	2.78505e-08	0.0234904	0.325	0.263	0.00055946	ENSMUSG00000052712
Hspg2	2.80211e-08	0.0221128	0.143	0.1	0.000562889	ENSMUSG00000028763
Eapp	2.81045e-08	0.0186854	0.168	0.12	0.000564564	ENSMUSG00000054302
Impa1	2.8587e-08	0.00977467	0.191	0.137	0.000574257	ENSMUSG00000027531
Sar1b	2.89556e-08	0.0167041	0.146	0.102	0.000581661	ENSMUSG00000020386
Bmp3	2.90607e-08	0.0326842	0.052	0.029	0.000583771	ENSMUSG00000029335
Tapbpl	2.92413e-08	0.0154272	0.152	0.107	0.000587399	ENSMUSG00000038213
Eif5b	2.93683e-08	0.0257538	0.353	0.272	0.00058995	ENSMUSG00000026083
Tmem164	2.94582e-08	0.0268605	0.081	0.05	0.000591756	ENSMUSG00000047045
Dlst	2.99304e-08	0.0122011	0.144	0.1	0.000601242	ENSMUSG00000004789
Zdhhc4	3.00484e-08	0.0156079	0.173	0.124	0.000603613	ENSMUSG00000001844
Zdhhc6	3.02519e-08	0.010357	0.147	0.102	0.000607701	ENSMUSG00000024982
Myo1b	3.03434e-08	0.0203615	0.311	0.235	0.000609539	ENSMUSG00000018417
Cox7c	3.04405e-08	0.0387043	0.66	0.531	0.000611488	ENSMUSG00000017778
Gzme	3.0496e-08	0.0107561	0.008	0	0.000612604	ENSMUSG00000022156
Ccdc59	3.06475e-08	0.00535005	0.221	0.162	0.000615646	ENSMUSG00000019897
Dnajc7	3.06479e-08	0.013226	0.227	0.167	0.000615655	ENSMUSG00000014195
Slc25a10	3.11016e-08	0.0243673	0.053	0.029	0.000624769	ENSMUSG00000025792
Ndufaf8	3.11757e-08	0.0242056	0.111	0.074	0.000626257	ENSMUSG00000078572
Plscr3	3.11821e-08	-0.000306327	0.326	0.244	0.000626386	ENSMUSG00000019461
Psmd11	3.13158e-08	0.0160592	0.344	0.261	0.000629071	ENSMUSG00000017428
Gamt	3.14366e-08	0.0189369	0.095	0.061	0.000631499	ENSMUSG00000020150
Tln2	3.16224e-08	0.0261563	0.403	0.309	0.00063523	ENSMUSG00000052698
Tmem159	3.17597e-08	0.0185298	0.203	0.149	0.000637989	ENSMUSG00000030917
Chp1	3.21786e-08	0.0133264	0.322	0.243	0.000646403	ENSMUSG00000014077
Wdr83os	3.2535e-08	0.00878158	0.301	0.227	0.000653563	ENSMUSG00000059355
Slc10a3	3.25836e-08	0.0259392	0.121	0.083	0.000654539	ENSMUSG00000032806
Sqle	3.26979e-08	0.0263317	0.03	0.013	0.000656836	ENSMUSG00000022351
Gtf3c1	3.30625e-08	0.0183023	0.096	0.062	0.00066416	ENSMUSG00000032777
Wisp1	3.32868e-08	0.0325582	0.093	0.06	0.000668665	ENSMUSG00000005124
Mbd6	3.32967e-08	0.0169382	0.154	0.109	0.000668863	ENSMUSG00000025409
Yipf1	3.33162e-08	0.0154916	0.157	0.111	0.000669256	ENSMUSG00000057375
Ror2	3.3616e-08	0.0286901	0.03	0.013	0.000675278	ENSMUSG00000021464
Slc38a2	3.45479e-08	0.0149446	0.245	0.183	0.000693998	ENSMUSG00000022462
Tkt	3.45513e-08	0.0205823	0.138	0.096	0.000694066	ENSMUSG00000021957
Fam46a	3.56453e-08	-0.179295	0.433	0.436	0.000716043	ENSMUSG00000032265
Vma21	3.5903e-08	0.0291057	0.308	0.236	0.000721219	ENSMUSG00000073131
Hint1	3.65787e-08	0.0241017	0.485	0.369	0.000734793	ENSMUSG00000020267
Vegfc	3.66952e-08	0.045719	0.493	0.384	0.000737133	ENSMUSG00000031520
AC153368.1	3.71621e-08	-0.00169915	0.32	0.246	0.000746512	ENSMUSG00000110841
Spg20	3.72686e-08	0.0336279	0.122	0.083	0.000748651	ENSMUSG00000036580
Ehmt2	3.75909e-08	0.0151124	0.137	0.095	0.000755125	ENSMUSG00000013787
U2af1l4	3.7653e-08	0.00465178	0.099	0.064	0.000756374	ENSMUSG00000078765
Acadvl	3.76769e-08	0.0365411	0.155	0.11	0.000756854	ENSMUSG00000018574
Mgmt	3.77724e-08	0.0210507	0.162	0.116	0.000758772	ENSMUSG00000054612
Ankrd44	3.78893e-08	0.0255335	0.095	0.062	0.00076112	ENSMUSG00000052331
Gm11808	3.79935e-08	-0.0971775	0.774	0.723	0.000763213	ENSMUSG00000068240
Mrps18c	3.84015e-08	0.0231008	0.155	0.11	0.00077141	ENSMUSG00000016833
Syngr2	3.85562e-08	0.0161098	0.172	0.123	0.000774516	ENSMUSG00000048277
Dnlz	3.88968e-08	0.0146965	0.119	0.081	0.000781359	ENSMUSG00000075467
Acy3	3.9086e-08	0.00951905	0.134	0.093	0.00078516	ENSMUSG00000024866
Mta1	3.92121e-08	0.0276286	0.182	0.133	0.000787692	ENSMUSG00000021144
Ing1	3.96067e-08	0.0256619	0.235	0.175	0.000795619	ENSMUSG00000045969
Akt2	3.99529e-08	0.0209313	0.338	0.256	0.000802574	ENSMUSG00000004056
Tmed5	4.01779e-08	0.00472539	0.338	0.256	0.000807095	ENSMUSG00000063406
Snhg6	4.06445e-08	0.0284693	0.145	0.102	0.000816467	ENSMUSG00000098234
Man2a2	4.07645e-08	0.0276643	0.141	0.099	0.000818877	ENSMUSG00000038886
Irak1	4.1098e-08	0.0269502	0.361	0.283	0.000825576	ENSMUSG00000031392
Osgep	4.12159e-08	0.0216751	0.093	0.06	0.000827945	ENSMUSG00000006289
Arxes2	4.13499e-08	0.0262805	0.024	0.009	0.000830637	ENSMUSG00000048040
Arvcf	4.20386e-08	0.0250941	0.054	0.03	0.000844471	ENSMUSG00000000325
Gadd45a	4.21633e-08	0.0301695	0.105	0.07	0.000846976	ENSMUSG00000036390
Eif2s3x	4.21702e-08	0.0212572	0.145	0.102	0.000847116	ENSMUSG00000035150
Prkab1	4.26113e-08	0.0249916	0.066	0.039	0.000855975	ENSMUSG00000029513
St3gal5	4.27393e-08	0.0279745	0.051	0.028	0.000858547	ENSMUSG00000056091
Sumf1	4.32636e-08	0.0241078	0.163	0.116	0.000869078	ENSMUSG00000030101
Fbxo25	4.34929e-08	0.024613	0.086	0.055	0.000873685	ENSMUSG00000038365
Ier2	4.36432e-08	0.0354688	0.076	0.047	0.000876704	ENSMUSG00000053560
Decr1	4.36509e-08	0.00796452	0.126	0.086	0.00087686	ENSMUSG00000028223
Arsa	4.39051e-08	0.0310859	0.17	0.123	0.000881966	ENSMUSG00000022620
Sorbs2	4.4295e-08	0.0211974	0.201	0.147	0.000889799	ENSMUSG00000031626
Tmem254a	4.44663e-08	0.00619195	0.524	0.41	0.00089324	ENSMUSG00000072676
Nsfl1c	4.47387e-08	0.00665963	0.22	0.162	0.000898711	ENSMUSG00000027455
Podnl1	4.49965e-08	0.00612054	0.238	0.176	0.000903889	ENSMUSG00000012889
Tef	4.51503e-08	0.0316943	0.174	0.125	0.000906979	ENSMUSG00000022389
S100a10	4.5467e-08	0.0163331	0.339	0.258	0.000913341	ENSMUSG00000041959
Acot7	4.60063e-08	0.0194346	0.042	0.021	0.000924174	ENSMUSG00000028937
Hmgcs2	4.60874e-08	0.0219839	0.068	0.041	0.000925804	ENSMUSG00000027875
Mrpl16	4.6245e-08	0.0219434	0.054	0.03	0.00092897	ENSMUSG00000024683
Ndufab1	4.66017e-08	-0.00168392	0.268	0.204	0.000936135	ENSMUSG00000030869
Grb10	4.67763e-08	0.0207731	0.356	0.271	0.000939642	ENSMUSG00000020176
Il6	4.68177e-08	-0.0260215	0	0.007	0.000940474	ENSMUSG00000025746
Sgsh	4.74729e-08	0.0307797	0.049	0.026	0.000953636	ENSMUSG00000005043
Slc26a2	4.86463e-08	0.021806	0.154	0.109	0.000977207	ENSMUSG00000034320
Hax1	4.90281e-08	0.0282626	0.114	0.077	0.000984877	ENSMUSG00000027944
Epb41l2	4.91116e-08	0.0162777	0.324	0.245	0.000986553	ENSMUSG00000019978
Psd4	4.92583e-08	0.032428	0.058	0.033	0.000989502	ENSMUSG00000026979
Jak1	4.95924e-08	0.0396847	0.543	0.42	0.000996212	ENSMUSG00000028530
Gm31520	4.97595e-08	0.0230483	0.149	0.105	0.000999569	ENSMUSG00000107653
B230118H07Rik	4.98191e-08	0.021638	0.161	0.115	0.00100077	ENSMUSG00000027165
Adam12	4.98811e-08	-0.12943	0.093	0.123	0.00100201	ENSMUSG00000054555
Kctd10	4.9963e-08	0.0211029	0.126	0.086	0.00100366	ENSMUSG00000001098
Chsy1	5.00022e-08	0.0266928	0.283	0.214	0.00100444	ENSMUSG00000032640
Akt1	5.02169e-08	0.0223188	0.385	0.293	0.00100876	ENSMUSG00000001729
Tmem181b-ps	5.04736e-08	0.0189825	0.052	0.028	0.00101391	ENSMUSG00000096780
Glyr1	5.07846e-08	0.0222939	0.136	0.095	0.00102016	ENSMUSG00000022536
Tnks1bp1	5.10305e-08	0.024835	0.225	0.168	0.0010251	ENSMUSG00000033955
Pfdn2	5.13213e-08	0.0202737	0.129	0.089	0.00103094	ENSMUSG00000006412
Ptprs	5.13419e-08	0.017009	0.136	0.095	0.00103136	ENSMUSG00000013236
Pcnx	5.14129e-08	0.0172587	0.149	0.106	0.00103278	ENSMUSG00000021140
Lama5	5.15846e-08	0.0325148	0.041	0.021	0.00103623	ENSMUSG00000015647
Dexi	5.17478e-08	0.0194836	0.082	0.051	0.00103951	ENSMUSG00000038055
Tcf20	5.18448e-08	0.0261436	0.097	0.064	0.00104146	ENSMUSG00000041852
Ccndbp1	5.20517e-08	0.019138	0.14	0.099	0.00104562	ENSMUSG00000023572
Ufc1	5.20917e-08	0.0226058	0.158	0.112	0.00104642	ENSMUSG00000062963
AK157302	5.21408e-08	0.00641888	0.161	0.114	0.0010474	ENSMUSG00000078139
Chmp1a	5.22855e-08	0.0243777	0.14	0.098	0.00105031	ENSMUSG00000000743
Zfp703	5.23373e-08	-0.174644	0.199	0.228	0.00105135	ENSMUSG00000085795
Erc1	5.23744e-08	0.0202482	0.118	0.08	0.0010521	ENSMUSG00000030172
Tor1aip2	5.24228e-08	0.0131908	0.327	0.249	0.00105307	ENSMUSG00000050565
Tspyl3	5.2849e-08	0.0251857	0.05	0.027	0.00106163	ENSMUSG00000074671
Ppm1a	5.29236e-08	0.00458462	0.276	0.206	0.00106313	ENSMUSG00000021096
Hapln1	5.29651e-08	0.0358255	0.061	0.036	0.00106396	ENSMUSG00000021613
Pfkl	5.30391e-08	0.0289865	0.098	0.065	0.00106545	ENSMUSG00000020277
Riok3	5.3692e-08	0.0216366	0.168	0.122	0.00107857	ENSMUSG00000024404
Kif13b	5.38857e-08	0.0302136	0.151	0.108	0.00108246	ENSMUSG00000060012
Snf8	5.40582e-08	0.0189441	0.187	0.137	0.00108592	ENSMUSG00000006058
Crlf2	5.4594e-08	0.0271085	0.07	0.042	0.00109668	ENSMUSG00000033467
Seh1l	5.49981e-08	0.0234297	0.108	0.072	0.0011048	ENSMUSG00000079614
Ewsr1	5.53396e-08	0.00109352	0.279	0.209	0.00111166	ENSMUSG00000009079
Syde2	5.60403e-08	0.0298572	0.046	0.024	0.00112574	ENSMUSG00000036863
Plac9b	5.67761e-08	-0.131445	0.626	0.618	0.00114052	ENSMUSG00000072674
Mrpl40	5.68074e-08	0.0255424	0.079	0.049	0.00114115	ENSMUSG00000022706
Ncbp1	5.69805e-08	0.0199778	0.133	0.093	0.00114462	ENSMUSG00000028330
Rab5c	5.7322e-08	0.0139595	0.34	0.257	0.00115148	ENSMUSG00000019173
Impdh2	5.75407e-08	0.0176731	0.115	0.078	0.00115588	ENSMUSG00000062867
Chpf2	5.78138e-08	0.0149908	0.071	0.043	0.00116136	ENSMUSG00000038181
Maged1	5.82186e-08	0.0268524	0.476	0.368	0.00116949	ENSMUSG00000025151
Fbxo3	5.87644e-08	0.0213067	0.101	0.067	0.00118046	ENSMUSG00000027180
Arpc1b	5.88906e-08	0.0804533	0.77	0.622	0.001183	ENSMUSG00000029622
Lrba	5.91088e-08	0.0177205	0.175	0.127	0.00118738	ENSMUSG00000028080
Pdrg1	6.01829e-08	0.0246569	0.143	0.101	0.00120895	ENSMUSG00000027472
Actn4	6.06533e-08	0.0482348	0.639	0.502	0.0012184	ENSMUSG00000054808
Ostf1	6.09305e-08	0.00504845	0.286	0.215	0.00122397	ENSMUSG00000024725
Atpaf2	6.13939e-08	0.022482	0.065	0.039	0.00123328	ENSMUSG00000042709
Cdkn1a	6.17731e-08	0.0196807	0.137	0.095	0.0012409	ENSMUSG00000023067
Atp6v1h	6.2187e-08	0.0169702	0.152	0.108	0.00124921	ENSMUSG00000033793
Atp6ap1	6.27003e-08	0.00768685	0.369	0.282	0.00125952	ENSMUSG00000019087
Fmo2	6.31243e-08	-0.163354	0.381	0.398	0.00126804	ENSMUSG00000040170
Psmd4	6.39853e-08	0.00465931	0.272	0.204	0.00128534	ENSMUSG00000005625
Pld3	6.41016e-08	0.0178877	0.361	0.278	0.00128767	ENSMUSG00000003363
Rpl7a	6.41389e-08	-0.00540989	0.556	0.457	0.00128842	ENSMUSG00000062647
Cog2	6.42643e-08	0.0277268	0.091	0.059	0.00129094	ENSMUSG00000031979
Gm28875	6.42894e-08	0.0253027	0.05	0.027	0.00129145	ENSMUSG00000100975
Tmem128	6.43173e-08	0.0157269	0.102	0.067	0.00129201	ENSMUSG00000067365
52966	6.49164e-08	-0.0695468	0.105	0.14	0.00130404	NA
A2m	6.54343e-08	0.0609178	0.15	0.108	0.00131444	ENSMUSG00000030111
Gna11	6.55886e-08	0.0162755	0.177	0.128	0.00131754	ENSMUSG00000034781
Gab1	6.61705e-08	-0.160096	0.149	0.181	0.00132923	ENSMUSG00000031714
Irx3	6.66567e-08	0.0309507	0.193	0.143	0.001339	ENSMUSG00000031734
Man1b1	6.73532e-08	0.0296306	0.102	0.068	0.00135299	ENSMUSG00000036646
Efhd2	6.75487e-08	0.0128471	0.117	0.079	0.00135692	ENSMUSG00000040659
Ikbke	6.81935e-08	0.0239392	0.036	0.017	0.00136987	ENSMUSG00000042349
Ccng2	6.8305e-08	0.0140969	0.157	0.111	0.00137211	ENSMUSG00000029385
Mrap	6.88266e-08	0.0277384	0.041	0.021	0.00138259	ENSMUSG00000039956
Cfh	6.90564e-08	-0.0512256	0.876	0.797	0.0013872	ENSMUSG00000026365
Hmgb1	6.90981e-08	-0.142585	0.649	0.625	0.00138804	ENSMUSG00000066551
Plscr1	6.91906e-08	0.0238285	0.113	0.076	0.0013899	ENSMUSG00000032369
Naglu	6.93731e-08	0.0141989	0.161	0.115	0.00139357	ENSMUSG00000001751
Itgb5	7.038e-08	0.00915958	0.191	0.139	0.00141379	ENSMUSG00000022817
Degs1	7.03836e-08	0.0201949	0.289	0.219	0.00141386	ENSMUSG00000038633
Nr1h2	7.17802e-08	0.0172014	0.16	0.114	0.00144192	ENSMUSG00000060601
Pepd	7.18879e-08	0.026621	0.054	0.031	0.00144408	ENSMUSG00000063931
Ptch2	7.20353e-08	0.0211438	0.028	0.012	0.00144704	ENSMUSG00000028681
Emc4	7.28799e-08	0.0170803	0.143	0.101	0.00146401	ENSMUSG00000027131
Ccdc22	7.32385e-08	0.0192389	0.021	0.007	0.00147121	ENSMUSG00000031143
Abcc5	7.33837e-08	0.0172819	0.165	0.119	0.00147413	ENSMUSG00000022822
Cmtr1	7.35218e-08	3.94934e-05	0.096	0.062	0.00147691	ENSMUSG00000024019
Bcl6	7.40284e-08	0.0184064	0.196	0.144	0.00148708	ENSMUSG00000022508
Ddx24	7.46804e-08	0.0161755	0.232	0.173	0.00150018	ENSMUSG00000041645
Idh3b	7.51509e-08	0.00861948	0.116	0.078	0.00150963	ENSMUSG00000027406
Klhl33	7.67571e-08	0.0210881	0.026	0.01	0.0015419	ENSMUSG00000090799
Susd1	7.73508e-08	-0.0322257	0.004	0.015	0.00155382	ENSMUSG00000038578
Mat2b	7.82948e-08	0.0190519	0.284	0.217	0.00157279	ENSMUSG00000042032
Metrnl	7.92733e-08	0.0208353	0.092	0.06	0.00159244	ENSMUSG00000039208
Sp2	8.00329e-08	0.017519	0.156	0.111	0.0016077	ENSMUSG00000018678
Nt5dc2	8.15381e-08	0.00140966	0.177	0.127	0.00163794	ENSMUSG00000071547
Lman2l	8.23026e-08	0.0169545	0.12	0.082	0.00165329	ENSMUSG00000001143
Palm	8.27358e-08	0.0258305	0.047	0.026	0.001662	ENSMUSG00000035863
Aifm1	8.31841e-08	0.0300888	0.083	0.053	0.001671	ENSMUSG00000036932
Gys1	8.39186e-08	0.0297569	0.057	0.033	0.00168576	ENSMUSG00000003865
Ndufv3	8.40329e-08	0.00596463	0.315	0.238	0.00168805	ENSMUSG00000024038
Basp1	8.41585e-08	0.0413829	0.499	0.387	0.00169058	ENSMUSG00000045763
Atp6ap2	8.4291e-08	-0.011896	0.328	0.249	0.00169324	ENSMUSG00000031007
Cisd1	8.51595e-08	0.0270738	0.13	0.091	0.00171068	ENSMUSG00000037710
Dpm3	8.54717e-08	0.0206762	0.137	0.096	0.00171696	ENSMUSG00000042737
Hsd3b7	8.56009e-08	0.000676307	0.171	0.123	0.00171955	ENSMUSG00000042289
Fkbp5	8.63172e-08	0.031768	0.144	0.102	0.00173394	ENSMUSG00000024222
Ppm1g	8.66252e-08	0.0105945	0.216	0.159	0.00174013	ENSMUSG00000029147
Timm29	8.81714e-08	0.000415528	0.167	0.12	0.00177119	ENSMUSG00000048429
St3gal2	8.82705e-08	0.012206	0.144	0.102	0.00177318	ENSMUSG00000031749
Dctn6	8.86021e-08	0.0129732	0.275	0.208	0.00177984	ENSMUSG00000031516
Pdgfd	8.86085e-08	0.0228052	0.138	0.097	0.00177997	ENSMUSG00000032006
Ggact	8.87664e-08	0.00277539	0.205	0.149	0.00178314	ENSMUSG00000041625
Gdap2	8.9591e-08	0.0236358	0.094	0.062	0.0017997	ENSMUSG00000027865
Ssbp4	8.98332e-08	0.0194094	0.114	0.077	0.00180457	ENSMUSG00000070003
Igsf8	9.01804e-08	0.00649328	0.152	0.108	0.00181154	ENSMUSG00000038034
Ncoa4	9.03762e-08	0.0308529	0.103	0.069	0.00181548	ENSMUSG00000056234
Tshz1	9.06908e-08	0.0109861	0.193	0.14	0.0018218	ENSMUSG00000046982
Stard13	9.12848e-08	0.0201371	0.113	0.077	0.00183373	ENSMUSG00000016128
Gm20521	9.22865e-08	0.00447749	0.44	0.341	0.00185385	ENSMUSG00000092232
Gulp1	9.41069e-08	0.0228918	0.15	0.107	0.00189042	ENSMUSG00000056870
Rab10os	9.42006e-08	0.0258076	0.043	0.023	0.0018923	ENSMUSG00000079179
Tmem254b	9.44637e-08	0.00475073	0.51	0.4	0.00189759	ENSMUSG00000021867
Sfr1	9.53493e-08	-0.147581	0.525	0.492	0.00191538	ENSMUSG00000025066
Ap3s1	9.56877e-08	0.0124009	0.162	0.117	0.00192217	ENSMUSG00000024480
Golga2	9.57845e-08	0.0126011	0.118	0.08	0.00192412	ENSMUSG00000002546
Nlrp3	9.66328e-08	-0.0222805	0.001	0.007	0.00194116	ENSMUSG00000032691
Rasgrp2	9.67138e-08	0.0161782	0.137	0.096	0.00194279	ENSMUSG00000032946
Mrpl23	9.6956e-08	-0.00327989	0.197	0.145	0.00194765	ENSMUSG00000037772
Arl6ip4	9.73137e-08	0.0160352	0.132	0.092	0.00195484	ENSMUSG00000029404
Tbc1d22a	9.7839e-08	0.0228184	0.068	0.041	0.00196539	ENSMUSG00000051864
Zfp219	9.99384e-08	0.0226263	0.051	0.028	0.00200756	ENSMUSG00000049295
Smim1	1.01087e-07	0.0230055	0.097	0.064	0.00203063	ENSMUSG00000078350
2410015M20Rik	1.01682e-07	0.0264669	0.091	0.059	0.00204259	ENSMUSG00000049760
Vps29	1.01927e-07	0.00294283	0.154	0.11	0.00204751	ENSMUSG00000029462
Fam104a	1.02077e-07	0.00328179	0.234	0.174	0.00205053	ENSMUSG00000041629
52854	1.02857e-07	-0.0689601	0.106	0.14	0.0020662	NA
Fut8	1.03154e-07	0.0165538	0.153	0.109	0.00207215	ENSMUSG00000021065
Rhod	1.04009e-07	0.0134143	0.071	0.043	0.00208933	ENSMUSG00000041845
Cdr2l	1.04082e-07	0.0244183	0.101	0.068	0.0020908	ENSMUSG00000050910
Chid1	1.04108e-07	0.0217651	0.063	0.037	0.00209131	ENSMUSG00000025512
Dnpep	1.04187e-07	0.0235605	0.065	0.039	0.0020929	ENSMUSG00000026209
Srsf5	1.04424e-07	0.0303431	0.604	0.474	0.00209767	ENSMUSG00000021134
Hsbp1	1.04664e-07	0.00914603	0.388	0.297	0.00210249	ENSMUSG00000031839
Mavs	1.04971e-07	0.020516	0.06	0.035	0.00210867	ENSMUSG00000037523
Golm1	1.06622e-07	0.0227702	0.105	0.07	0.00214182	ENSMUSG00000021556
Gadd45g	1.0709e-07	0.00960191	0.168	0.121	0.00215123	ENSMUSG00000021453
Ccdc102a	1.07512e-07	0.020855	0.1	0.067	0.0021597	ENSMUSG00000063605
Xpa	1.11402e-07	0.0234228	0.106	0.071	0.00223783	ENSMUSG00000028329
Bach2	1.11794e-07	0.0175559	0.032	0.015	0.00224572	ENSMUSG00000040270
Tm2d1	1.13341e-07	0.0127655	0.175	0.128	0.00227679	ENSMUSG00000028563
Fgfr2	1.13605e-07	0.0790075	0.782	0.641	0.0022821	ENSMUSG00000030849
Ifngr2	1.1379e-07	0.0141368	0.31	0.235	0.00228581	ENSMUSG00000022965
Phb	1.13922e-07	0.000165086	0.257	0.195	0.00228847	ENSMUSG00000038845
Cebpb	1.14531e-07	0.00298701	0.176	0.127	0.0023007	ENSMUSG00000056501
Sertad1	1.15062e-07	0.0258385	0.047	0.025	0.00231137	ENSMUSG00000008384
Gm12918	1.15391e-07	-0.123139	0.334	0.372	0.00231797	ENSMUSG00000066315
Malsu1	1.15471e-07	0.0171459	0.106	0.071	0.00231959	ENSMUSG00000029815
Pdha1	1.16155e-07	0.0118626	0.282	0.214	0.00233333	ENSMUSG00000031299
Tex264	1.1673e-07	0.0100801	0.166	0.119	0.00234488	ENSMUSG00000040813
Slc2a3	1.17001e-07	0.00742339	0.124	0.086	0.00235031	ENSMUSG00000003153
Rad23b	1.18246e-07	0.0183256	0.171	0.124	0.00237532	ENSMUSG00000028426
Rer1	1.18529e-07	0.00255768	0.355	0.271	0.002381	ENSMUSG00000029048
Vipr2	1.19259e-07	0.0251735	0.052	0.029	0.00239568	ENSMUSG00000011171
Rhot2	1.1944e-07	0.0227781	0.102	0.068	0.00239931	ENSMUSG00000025733
Rnaset2a	1.21225e-07	0.043851	0.651	0.541	0.00243516	ENSMUSG00000095687
Alpl	1.2127e-07	0.0301824	0.224	0.17	0.00243607	ENSMUSG00000028766
Socs5	1.22312e-07	0.0150038	0.138	0.097	0.002457	ENSMUSG00000037104
Tmem259	1.23287e-07	0.0231252	0.091	0.06	0.00247659	ENSMUSG00000013858
Gypc	1.24324e-07	0.0107018	0.322	0.246	0.00249741	ENSMUSG00000090523
Uqcrb	1.25021e-07	-0.000332654	0.391	0.305	0.00251142	ENSMUSG00000021520
Praf2	1.25491e-07	0.00903834	0.232	0.174	0.00252087	ENSMUSG00000031149
Rpl13	1.2582e-07	-0.0936024	0.849	0.803	0.00252747	ENSMUSG00000000740
Large1	1.25878e-07	0.0298693	0.044	0.023	0.00252863	ENSMUSG00000004383
Ndufb5	1.26439e-07	0.0191153	0.235	0.177	0.0025399	ENSMUSG00000027673
Msrb3	1.26729e-07	0.0103486	0.414	0.318	0.00254573	ENSMUSG00000051236
Gm45234	1.26898e-07	0.00480277	0.216	0.162	0.00254913	ENSMUSG00000107478
Itpr2	1.2709e-07	0.0208093	0.2	0.148	0.00255298	ENSMUSG00000030287
Taldo1	1.28086e-07	0.0118792	0.173	0.126	0.002573	ENSMUSG00000025503
Rpl17-ps5	1.28435e-07	-0.114047	0.316	0.344	0.00258001	ENSMUSG00000081855
Tbcel	1.2948e-07	0.0117244	0.145	0.103	0.00260099	ENSMUSG00000037287
Myo1c	1.30195e-07	0.0134963	0.207	0.152	0.00261535	ENSMUSG00000017774
Rbbp4	1.30769e-07	0.00354244	0.363	0.277	0.00262688	ENSMUSG00000057236
Spcs2	1.3143e-07	0.0098455	0.393	0.298	0.00264016	ENSMUSG00000035227
Gm42429	1.31694e-07	0.0106448	0.174	0.127	0.00264548	ENSMUSG00000105373
Idh3g	1.31782e-07	0.016263	0.167	0.121	0.00264723	ENSMUSG00000002010
Plekhb2	1.324e-07	0.0183992	0.048	0.026	0.00265966	ENSMUSG00000026123
Lypla1	1.32845e-07	0.0250022	0.123	0.085	0.00266859	ENSMUSG00000025903
Gm14303	1.33076e-07	-0.130114	0.146	0.182	0.00267322	ENSMUSG00000081344
[truncated: 18,089 more rows]

## Sheet: Chondrocyte
gene_name	p_val	avg_log2FC	pct.1	pct.2	p_val_adj	ensembl
mt-Nd4l	2.9422e-62	-0.188182	0.959	0.98	5.9103e-58	ENSMUSG00000065947
Gm10222	3.40688e-54	-0.186945	0.93	0.962	6.84374e-50	ENSMUSG00000067736
mt-Atp8	1.02015e-50	-0.11761	0.965	0.977	2.04927e-46	ENSMUSG00000064356
mt-Nd5	2.60778e-41	-0.113976	0.974	0.988	5.23851e-37	ENSMUSG00000064367
Cxcl12	5.69674e-41	0.285132	0.708	0.407	1.14436e-36	ENSMUSG00000061353
Hspa1b	2.16757e-40	-0.448858	0.267	0.5	4.35422e-36	ENSMUSG00000090877
Ndufa4l2	3.89231e-39	0.282954	0.442	0.177	7.81888e-35	ENSMUSG00000040280
Col10a1	1.97813e-36	0.609009	0.464	0.199	3.97367e-32	ENSMUSG00000039462
Fap	1.22251e-35	-0.252826	0.713	0.815	2.45578e-31	ENSMUSG00000000392
Spon2	7.93833e-35	0.235932	0.282	0.083	1.59465e-30	ENSMUSG00000037379
Prss34	1.39235e-32	-0.131868	0.004	0.129	2.79696e-28	ENSMUSG00000056399
Tgfbr3	5.2629e-26	-0.252943	0.426	0.583	1.05721e-21	ENSMUSG00000029287
H3f3a	8.3255e-26	-0.115572	0.923	0.95	1.67243e-21	ENSMUSG00000060743
Matn1	8.9286e-26	0.37837	0.493	0.292	1.79358e-21	ENSMUSG00000040533
Rpl37	1.24594e-25	0.117781	0.951	0.954	2.50284e-21	ENSMUSG00000041841
Igfbp5	2.10588e-25	0.106921	0.328	0.129	4.23028e-21	ENSMUSG00000026185
Selenow	3.27319e-23	0.2085	0.693	0.497	6.57518e-19	ENSMUSG00000041571
Vgll4	8.09221e-23	-0.224471	0.579	0.685	1.62556e-18	ENSMUSG00000030315
Hspa1a	2.08369e-22	-0.302729	0.281	0.452	4.18572e-18	ENSMUSG00000091971
Car2	4.4981e-22	-0.128126	0.023	0.132	9.03578e-18	ENSMUSG00000027562
Zbtb20	8.9002e-22	-0.131429	0.888	0.915	1.78787e-17	ENSMUSG00000022708
Igfbp4	1.64447e-21	0.128505	0.345	0.158	3.3034e-17	ENSMUSG00000017493
Fam180a	2.17887e-21	0.227515	0.488	0.301	4.37691e-17	ENSMUSG00000047420
Cavin3	2.87317e-21	0.202875	0.554	0.345	5.77163e-17	ENSMUSG00000037060
Lamp1	3.74003e-21	-0.163879	0.794	0.852	7.51296e-17	ENSMUSG00000031447
mt-Nd4	4.03252e-21	-0.0331952	0.997	0.999	8.10052e-17	ENSMUSG00000064363
P4ha2	5.33821e-21	0.202517	0.683	0.491	1.07234e-16	ENSMUSG00000018906
Chst11	6.90163e-21	-0.150154	0.891	0.927	1.3864e-16	ENSMUSG00000034612
Klf2	2.19589e-20	0.330643	0.66	0.492	4.41111e-16	ENSMUSG00000055148
Chrdl1	3.11203e-20	-0.187068	0.727	0.796	6.25145e-16	ENSMUSG00000031283
Cdkn1c	9.09746e-20	0.349926	0.607	0.452	1.8275e-15	ENSMUSG00000037664
Gxylt2	1.25019e-19	-0.179304	0.659	0.754	2.51137e-15	ENSMUSG00000030074
S100a6	1.32812e-19	0.2651	0.732	0.586	2.66792e-15	ENSMUSG00000001025
Gm42418	1.57089e-19	-0.0953493	0.974	0.98	3.15559e-15	ENSMUSG00000098178
Tnfrsf11b	2.85484e-19	-0.262251	0.482	0.617	5.7348e-15	ENSMUSG00000063727
Anxa8	3.5379e-19	0.259932	0.731	0.566	7.10694e-15	ENSMUSG00000021950
Sfpq	4.15614e-19	-0.167528	0.707	0.78	8.34885e-15	ENSMUSG00000028820
Hba-a1	9.09134e-19	-0.0918592	0.033	0.137	1.82627e-14	ENSMUSG00000069919
Ier3ip1	2.548e-18	0.157889	0.842	0.773	5.11843e-14	ENSMUSG00000090000
Adipoq	4.30377e-18	0.0821842	0.14	0.036	8.64541e-14	ENSMUSG00000022878
mt-Co1	6.18202e-18	-0.0100546	0.998	0.998	1.24185e-13	ENSMUSG00000064351
Col6a2	8.42131e-18	0.159187	0.959	0.952	1.69167e-13	ENSMUSG00000020241
Rgcc	1.47159e-17	0.228583	0.536	0.358	2.95613e-13	ENSMUSG00000022018
Rps12-ps3	2.00394e-17	-0.23583	0.68	0.799	4.02551e-13	ENSMUSG00000067038
Rps6-ps4	8.99268e-17	-0.160288	0.252	0.419	1.80645e-12	ENSMUSG00000081406
Mbnl1	9.92328e-17	-0.114477	0.895	0.915	1.99339e-12	ENSMUSG00000027763
Serpina1d	1.8759e-16	-0.293558	0.572	0.664	3.7683e-12	ENSMUSG00000071177
mt-Nd2	2.27971e-16	-0.0326977	0.988	0.994	4.57948e-12	ENSMUSG00000064345
Matn3	2.47238e-16	0.105183	0.947	0.952	4.96652e-12	ENSMUSG00000020583
Sema3d	2.47766e-16	-0.218894	0.638	0.726	4.97713e-12	ENSMUSG00000040254
Lsp1	2.62324e-16	-0.162954	0.799	0.857	5.26957e-12	ENSMUSG00000018819
Emp1	2.79008e-16	0.206179	0.627	0.443	5.60472e-12	ENSMUSG00000030208
Klf4	3.41715e-16	0.2	0.873	0.805	6.86437e-12	ENSMUSG00000003032
Nfat5	8.35865e-16	-0.148504	0.717	0.769	1.67909e-11	ENSMUSG00000003847
Clec3a	1.03506e-15	-0.152212	0.229	0.36	2.07924e-11	ENSMUSG00000008874
Ptch1	1.25797e-15	-0.175855	0.763	0.826	2.52701e-11	ENSMUSG00000021466
Gpbp1	2.7527e-15	-0.148682	0.504	0.601	5.52962e-11	ENSMUSG00000032745
Tuba1a	2.85484e-15	0.230551	0.749	0.651	5.73481e-11	ENSMUSG00000072235
Serpina1a	3.40767e-15	-0.288275	0.52	0.627	6.84532e-11	ENSMUSG00000066366
Cox6a1	3.7056e-15	0.14525	0.936	0.894	7.4438e-11	ENSMUSG00000041697
Arsi	5.6313e-15	0.143923	0.233	0.11	1.13122e-10	ENSMUSG00000036412
Gm28661	6.90875e-15	-0.193278	0.994	0.999	1.38783e-10	ENSMUSG00000102070
Fth1	7.0603e-15	-0.0873791	0.941	0.967	1.41827e-10	ENSMUSG00000024661
Sox9	1.8925e-14	-0.0891617	0.964	0.985	3.80165e-10	ENSMUSG00000000567
C430049B03Rik	4.98155e-14	0.151921	0.23	0.11	1.00069e-09	ENSMUSG00000087365
Rps12l1	5.43887e-14	-0.102061	0.401	0.558	1.09256e-09	ENSMUSG00000078087
Arhgap5	6.98879e-14	-0.172367	0.55	0.626	1.40391e-09	ENSMUSG00000035133
Ddx17	8.68448e-14	-0.103431	0.844	0.864	1.74454e-09	ENSMUSG00000055065
Tnfaip2	9.45838e-14	0.112341	0.184	0.078	1.9e-09	ENSMUSG00000021281
Pkm	1.16436e-13	0.13708	0.875	0.833	2.33897e-09	ENSMUSG00000032294
Zfr	1.23393e-13	-0.127619	0.676	0.737	2.47872e-09	ENSMUSG00000022201
1190002N15Rik	1.29524e-13	-0.204595	0.607	0.691	2.60187e-09	ENSMUSG00000045414
Prkar1a	1.31817e-13	-0.128705	0.778	0.806	2.64795e-09	ENSMUSG00000020612
Mgp	1.61295e-13	-0.169375	0.936	0.97	3.24009e-09	ENSMUSG00000030218
BC005537	1.75571e-13	-0.141089	0.691	0.74	3.52686e-09	ENSMUSG00000019132
Chad	1.95484e-13	-0.0712727	0.994	0.998	3.92688e-09	ENSMUSG00000039084
Tmem254a	2.08282e-13	-0.131144	0.776	0.821	4.18397e-09	ENSMUSG00000072676
Col1a1	2.47849e-13	0.158894	0.73	0.578	4.97878e-09	ENSMUSG00000001506
Aldh1a3	4.2885e-13	0.215565	0.174	0.077	8.61473e-09	ENSMUSG00000015134
Anxa2	7.70349e-13	0.150814	0.85	0.799	1.54748e-08	ENSMUSG00000032231
Nr3c1	8.74406e-13	-0.134903	0.661	0.715	1.75651e-08	ENSMUSG00000024431
Hba-a2	9.47732e-13	-0.0688063	0.029	0.104	1.9038e-08	ENSMUSG00000069917
Timp2	1.14297e-12	-0.139533	0.811	0.848	2.296e-08	ENSMUSG00000017466
Hnrnpu	1.75888e-12	-0.0914336	0.855	0.866	3.53323e-08	ENSMUSG00000039630
Loxl2	2.23413e-12	0.179865	0.836	0.73	4.48791e-08	ENSMUSG00000034205
Ramp1	2.69693e-12	0.094194	0.148	0.058	5.41759e-08	ENSMUSG00000034353
Tmem254b	3.33465e-12	-0.125052	0.752	0.794	6.69864e-08	ENSMUSG00000021867
Trim47	3.58527e-12	0.151232	0.603	0.457	7.2021e-08	ENSMUSG00000020773
Edil3	4.56839e-12	-0.160346	0.561	0.621	9.17697e-08	ENSMUSG00000034488
Gm3272	4.5926e-12	-0.0758218	0.222	0.361	9.22561e-08	ENSMUSG00000078967
Rock2	5.19974e-12	-0.137349	0.676	0.72	1.04452e-07	ENSMUSG00000020580
Col6a1	7.09025e-12	0.124241	0.97	0.972	1.42429e-07	ENSMUSG00000001119
H2-DMa	8.02356e-12	0.0762284	0.172	0.075	1.61177e-07	ENSMUSG00000037649
Prelp	8.83511e-12	-0.135339	0.902	0.934	1.7748e-07	ENSMUSG00000041577
Gm28037	9.55166e-12	-0.148125	0.347	0.494	1.91874e-07	ENSMUSG00000098371
Pgk1	1.10311e-11	0.158939	0.824	0.745	2.21592e-07	ENSMUSG00000062070
Purb	1.64276e-11	-0.100053	0.828	0.852	3.29998e-07	ENSMUSG00000094483
Col1a2	1.64292e-11	0.171945	0.913	0.837	3.3003e-07	ENSMUSG00000029661
Setd7	1.65069e-11	-0.132675	0.642	0.692	3.31591e-07	ENSMUSG00000037111
H2-Ab1	1.69864e-11	0.0759631	0.143	0.057	3.41223e-07	ENSMUSG00000073421
Rps24-ps3	1.77677e-11	0.0582594	0.122	0.043	3.56917e-07	ENSMUSG00000081049
Meltf	1.83416e-11	-0.119074	0.87	0.919	3.68446e-07	ENSMUSG00000022780
Dnaja1	1.83588e-11	-0.141296	0.704	0.775	3.68792e-07	ENSMUSG00000028410
Mif	2.18728e-11	0.160435	0.669	0.555	4.3938e-07	ENSMUSG00000033307
Gm2000	2.4957e-11	-0.161893	0.162	0.279	5.01337e-07	ENSMUSG00000078193
Ywhaq	2.79775e-11	0.181405	0.785	0.657	5.62012e-07	ENSMUSG00000076432
4930523C07Rik	3.0267e-11	0.109395	0.355	0.221	6.08003e-07	ENSMUSG00000090394
Higd1a	3.13381e-11	0.15079	0.646	0.496	6.2952e-07	ENSMUSG00000038412
Epyc	3.97966e-11	-0.0948085	0.869	0.886	7.99435e-07	ENSMUSG00000019936
Gm20427	4.00898e-11	0.122194	0.82	0.75	8.05325e-07	ENSMUSG00000092595
Islr	4.07799e-11	-0.109792	0.826	0.849	8.19186e-07	ENSMUSG00000037206
App	4.87868e-11	-0.0560959	0.92	0.94	9.8003e-07	ENSMUSG00000022892
Csnk1a1	5.8783e-11	-0.152083	0.696	0.746	1.18083e-06	ENSMUSG00000024576
Mcpt8	8.53737e-11	-0.0478669	0.001	0.04	1.71499e-06	ENSMUSG00000022157
Tmx1	9.32509e-11	-0.0883043	0.835	0.855	1.87322e-06	ENSMUSG00000021072
Gdf10	9.7055e-11	-0.159826	0.446	0.54	1.94964e-06	ENSMUSG00000021943
Gm26532	1.07007e-10	0.179564	0.567	0.424	2.14956e-06	ENSMUSG00000097296
Pcolce	1.35841e-10	0.180628	0.437	0.302	2.72877e-06	ENSMUSG00000029718
Rpn1	1.45936e-10	0.146439	0.725	0.603	2.93157e-06	ENSMUSG00000030062
Zfp638	1.49622e-10	-0.153488	0.328	0.419	3.0056e-06	ENSMUSG00000030016
Fndc3a	1.69641e-10	-0.148374	0.403	0.487	3.40775e-06	ENSMUSG00000033487
Gm13981	1.71703e-10	0.0686729	0.125	0.049	3.44917e-06	ENSMUSG00000074930
Inpp1	1.78913e-10	0.125892	0.424	0.282	3.594e-06	ENSMUSG00000026102
Bmp6	1.87487e-10	0.112619	0.167	0.079	3.76623e-06	ENSMUSG00000039004
mt-Rnr1	2.12527e-10	-0.0186814	0.962	0.97	4.26925e-06	ENSMUSG00000064337
Qser1	2.33305e-10	-0.119278	0.302	0.402	4.68664e-06	ENSMUSG00000074994
Cemip	2.33382e-10	-0.130427	0.586	0.666	4.68817e-06	ENSMUSG00000052353
Slc7a5	2.38662e-10	0.0679656	0.202	0.104	4.79424e-06	ENSMUSG00000040010
Ctgf	2.51416e-10	0.198632	0.815	0.726	5.05045e-06	ENSMUSG00000019997
Emb	2.5783e-10	0.117487	0.59	0.426	5.17929e-06	ENSMUSG00000021728
Lamp2	2.70769e-10	-0.107276	0.793	0.822	5.43921e-06	ENSMUSG00000016534
Col5a1	3.05223e-10	0.151587	0.492	0.358	6.13133e-06	ENSMUSG00000026837
Ash1l	3.10502e-10	-0.110028	0.535	0.607	6.23736e-06	ENSMUSG00000028053
Klhl9	3.46188e-10	-0.136382	0.441	0.514	6.95422e-06	ENSMUSG00000070923
Dact1	3.46218e-10	-0.130256	0.14	0.233	6.95483e-06	ENSMUSG00000044548
Tmem106b	3.7056e-10	-0.118566	0.455	0.531	7.4438e-06	ENSMUSG00000029571
Gapdh	4.15575e-10	0.111763	0.958	0.96	8.34808e-06	ENSMUSG00000057666
Plp2	4.3228e-10	0.140365	0.715	0.607	8.68364e-06	ENSMUSG00000031146
mt-Rnr2	4.40859e-10	-0.058425	0.975	0.992	8.85597e-06	ENSMUSG00000064339
Gars	4.63605e-10	0.104957	0.372	0.238	9.31289e-06	ENSMUSG00000029777
Fkbp11	5.07743e-10	0.0985816	0.352	0.227	1.01995e-05	ENSMUSG00000003355
Ptms	5.38543e-10	-0.0791305	0.9	0.936	1.08183e-05	ENSMUSG00000030122
Sh3pxd2a	5.42332e-10	-0.108401	0.737	0.783	1.08944e-05	ENSMUSG00000053617
Loxl4	5.76625e-10	0.201383	0.299	0.192	1.15832e-05	ENSMUSG00000025185
Pgm2	6.08972e-10	0.0980172	0.342	0.214	1.2233e-05	ENSMUSG00000025791
F5	6.11131e-10	-0.129133	0.755	0.819	1.22764e-05	ENSMUSG00000026579
Nfix	7.08047e-10	-0.0940812	0.867	0.889	1.42232e-05	ENSMUSG00000001911
Dctn3	9.42365e-10	0.0583599	0.212	0.115	1.89302e-05	ENSMUSG00000028447
52525	9.63874e-10	0.0321944	0.045	0.005	1.93623e-05	NA
P3h2	9.90091e-10	0.0988559	0.257	0.153	1.9889e-05	ENSMUSG00000038168
Pxylp1	1.03221e-09	0.168306	0.506	0.37	2.0735e-05	ENSMUSG00000043587
Ptges3l	1.12297e-09	0.124717	0.248	0.145	2.25583e-05	ENSMUSG00000097487
Rsl1d1	1.12702e-09	-0.143953	0.49	0.547	2.26396e-05	ENSMUSG00000005846
Sh3bgrl	1.43757e-09	-0.12391	0.485	0.558	2.88779e-05	ENSMUSG00000031246
AC164623.1	1.79882e-09	-0.038284	0.001	0.035	3.61346e-05	ENSMUSG00000112907
Pf4	1.82991e-09	-0.0623297	0.001	0.035	3.67593e-05	ENSMUSG00000029373
Sec61a1	1.89421e-09	0.128609	0.636	0.497	3.80509e-05	ENSMUSG00000030082
Bhlhe41	1.94856e-09	-0.135887	0.455	0.526	3.91427e-05	ENSMUSG00000030256
Thsd4	1.96236e-09	-0.160804	0.187	0.28	3.94199e-05	ENSMUSG00000032289
Eif4ebp1	2.06285e-09	0.0705714	0.151	0.071	4.14385e-05	ENSMUSG00000031490
Cap1	2.15859e-09	0.100087	0.387	0.255	4.33617e-05	ENSMUSG00000028656
Serpine1	2.54789e-09	0.200484	0.356	0.242	5.1182e-05	ENSMUSG00000037411
Omd	2.72237e-09	-0.185702	0.293	0.384	5.46869e-05	ENSMUSG00000048368
Hspa8	2.86512e-09	-0.117347	0.9	0.935	5.75544e-05	ENSMUSG00000015656
Pnrc2	2.90803e-09	-0.128934	0.683	0.72	5.84166e-05	ENSMUSG00000028675
Prg2	3.22177e-09	-0.0531026	0	0.031	6.47189e-05	ENSMUSG00000027073
Hs3st3b1	3.56227e-09	-0.136073	0.458	0.544	7.15589e-05	ENSMUSG00000070407
Rcn3	3.82245e-09	0.103152	0.935	0.921	7.67853e-05	ENSMUSG00000019539
Pik3r1	4.01858e-09	-0.129125	0.374	0.465	8.07253e-05	ENSMUSG00000041417
Tm9sf3	4.18929e-09	-0.0983239	0.839	0.874	8.41545e-05	ENSMUSG00000025016
Ihh	4.42641e-09	0.222041	0.373	0.261	8.89177e-05	ENSMUSG00000006538
Ackr3	4.47387e-09	0.0723012	0.083	0.027	8.98711e-05	ENSMUSG00000044337
Sec61g	5.02049e-09	0.106363	0.887	0.879	0.000100852	ENSMUSG00000078974
Srrm2	5.11975e-09	-0.0975211	0.719	0.742	0.000102846	ENSMUSG00000039218
Cdkn1a	5.299e-09	0.163228	0.419	0.301	0.000106446	ENSMUSG00000023067
Chd9	5.32523e-09	-0.145639	0.398	0.473	0.000106973	ENSMUSG00000056608
Rps5	5.5038e-09	0.0733489	0.953	0.961	0.00011056	ENSMUSG00000012848
Pcsk6	5.51321e-09	0.230251	0.551	0.432	0.000110749	ENSMUSG00000030513
Rpl27a-ps2	5.60578e-09	0.0374914	0.048	0.008	0.000112609	ENSMUSG00000058430
Slc1a5	5.95386e-09	0.104705	0.5	0.366	0.000119601	ENSMUSG00000001918
Gm2225	6.86492e-09	0.0401669	0.104	0.04	0.000137902	ENSMUSG00000110057
Cnmd	6.9697e-09	-0.0313146	0.976	0.978	0.000140007	ENSMUSG00000022025
Sesn3	7.22366e-09	-0.126734	0.399	0.476	0.000145109	ENSMUSG00000032009
Bglap	7.39063e-09	-0.199453	0.562	0.612	0.000148463	ENSMUSG00000074483
Rps23-ps1	7.73067e-09	-0.0545856	0.119	0.213	0.000155294	ENSMUSG00000100755
Prnp	8.13144e-09	-0.0875294	0.887	0.916	0.000163344	ENSMUSG00000079037
Pak1	8.27356e-09	-0.140564	0.489	0.545	0.000166199	ENSMUSG00000030774
Pde3a	8.70305e-09	-0.143457	0.543	0.605	0.000174827	ENSMUSG00000041741
Lats1	9.40925e-09	-0.110382	0.259	0.349	0.000189013	ENSMUSG00000040021
Odc1	1.00109e-08	0.122971	0.68	0.57	0.000201098	ENSMUSG00000011179
Gm7618	1.0038e-08	0.0336847	0.047	0.008	0.000201643	ENSMUSG00000095288
Tnc	1.06006e-08	0.0786813	0.111	0.046	0.000212946	ENSMUSG00000028364
Rras2	1.15413e-08	0.106641	0.538	0.405	0.000231843	ENSMUSG00000055723
Shisa2	1.16388e-08	-0.123938	0.545	0.602	0.000233801	ENSMUSG00000044461
Lgals3	1.24848e-08	0.14715	0.797	0.734	0.000250795	ENSMUSG00000050335
Slc13a5	1.2565e-08	0.150215	0.563	0.444	0.000252406	ENSMUSG00000020805
Ivns1abp	1.3145e-08	-0.0875506	0.898	0.921	0.000264056	ENSMUSG00000023150
Fn1	1.34573e-08	0.155541	0.944	0.901	0.000270331	ENSMUSG00000026193
H2-DMb2	1.4509e-08	0.0503782	0.152	0.074	0.000291456	ENSMUSG00000037548
Kctd4	1.51876e-08	-0.122634	0.496	0.561	0.000305089	ENSMUSG00000046523
Lrrc59	1.58269e-08	0.10008	0.583	0.458	0.000317931	ENSMUSG00000020869
Sox5	1.61393e-08	-0.132339	0.686	0.739	0.000324206	ENSMUSG00000041540
Timp1	1.67373e-08	0.125459	0.513	0.393	0.000336219	ENSMUSG00000001131
Ak4	1.68271e-08	0.0879307	0.337	0.223	0.000338023	ENSMUSG00000028527
Gm13341	1.6942e-08	0.0831939	0.309	0.197	0.000340331	ENSMUSG00000083863
Stk25	1.70745e-08	0.0860352	0.361	0.242	0.000342993	ENSMUSG00000026277
Egr1	1.72645e-08	-0.0630349	0.92	0.928	0.000346809	ENSMUSG00000038418
Bmpr1a	1.94374e-08	-0.109375	0.671	0.692	0.000390458	ENSMUSG00000021796
Nme1	1.95027e-08	0.122636	0.705	0.63	0.00039177	ENSMUSG00000037601
Pmp22	1.97452e-08	0.119379	0.504	0.374	0.000396642	ENSMUSG00000018217
Ell2	2.31366e-08	-0.124386	0.446	0.517	0.000464768	ENSMUSG00000001542
Angptl2	2.48368e-08	-0.12884	0.705	0.743	0.000498921	ENSMUSG00000004105
Fam155a	2.8886e-08	-0.0541076	0.023	0.073	0.000580262	ENSMUSG00000079157
Nedd4	2.99655e-08	-0.0331299	0.968	0.981	0.000601946	ENSMUSG00000032216
52739	3.0509e-08	-0.020807	0.063	0.134	0.000612865	NA
Calu	3.22493e-08	0.0587293	0.942	0.955	0.000647825	ENSMUSG00000029767
52106	3.29879e-08	0.251396	0.425	0.328	0.000662662	NA
Bnip3	3.59303e-08	0.15376	0.635	0.521	0.000721768	ENSMUSG00000078566
Hnrnpa2b1	3.61964e-08	-0.0464378	0.95	0.963	0.000727114	ENSMUSG00000004980
S100a11	3.6659e-08	0.0984619	0.841	0.773	0.000736405	ENSMUSG00000027907
Isg20	3.6952e-08	0.103264	0.238	0.145	0.000742292	ENSMUSG00000039236
Tnfrsf12a	3.74249e-08	0.0487055	0.176	0.094	0.000751791	ENSMUSG00000023905
Plaur	3.79924e-08	0.0514878	0.142	0.07	0.000763191	ENSMUSG00000046223
Zfp652	4.04927e-08	0.149665	0.638	0.543	0.000813418	ENSMUSG00000075595
Ssr2	4.56157e-08	0.101105	0.878	0.833	0.000916328	ENSMUSG00000041355
Gale	4.68445e-08	0.124657	0.659	0.53	0.000941013	ENSMUSG00000028671
Scpep1	4.73639e-08	-0.106686	0.684	0.718	0.000951446	ENSMUSG00000000278
Dlx5	4.92427e-08	-0.109933	0.704	0.736	0.000989188	ENSMUSG00000029755
Larp4	5.06897e-08	-0.113903	0.396	0.465	0.00101826	ENSMUSG00000023025
Ldha	5.13404e-08	0.0923724	0.879	0.852	0.00103133	ENSMUSG00000063229
Slc16a1	5.21939e-08	0.0881254	0.401	0.275	0.00104847	ENSMUSG00000032902
Nrk	5.33448e-08	-0.106529	0.523	0.578	0.00107159	ENSMUSG00000052854
Nxph4	5.34501e-08	0.046784	0.089	0.034	0.00107371	ENSMUSG00000040258
51521	5.44097e-08	-0.0197927	0.046	0.107	0.00109298	NA
Wnk1	5.60166e-08	-0.103826	0.583	0.626	0.00112526	ENSMUSG00000045962
Gm4986	5.68067e-08	0.0331894	0.063	0.018	0.00114113	ENSMUSG00000080996
Hsph1	6.14836e-08	-0.107031	0.17	0.25	0.00123508	ENSMUSG00000029657
Gm6472	6.1696e-08	0.149609	0.574	0.479	0.00123935	ENSMUSG00000095597
Dnajc3	6.29771e-08	-0.0955575	0.821	0.843	0.00126508	ENSMUSG00000022136
Tpt1-ps6	6.3531e-08	0.0381787	0.075	0.025	0.00127621	ENSMUSG00000084284
Klf6	6.57518e-08	0.158629	0.679	0.588	0.00132082	ENSMUSG00000000078
Shox2	7.00313e-08	-0.103466	0.741	0.777	0.00140679	ENSMUSG00000027833
Fam129b	7.06906e-08	0.10987	0.77	0.686	0.00142003	ENSMUSG00000026796
Usmg5	7.41366e-08	0.111282	0.757	0.682	0.00148926	ENSMUSG00000071528
Ptma	7.46387e-08	-0.0700483	0.953	0.978	0.00149934	ENSMUSG00000026238
Gm8420	7.63775e-08	0.0277061	0.055	0.014	0.00153427	ENSMUSG00000072324
Nipbl	7.98216e-08	-0.117907	0.553	0.601	0.00160346	ENSMUSG00000022141
Cyr61	8.08263e-08	0.146582	0.873	0.829	0.00162364	ENSMUSG00000028195
Xaf1	8.56933e-08	0.0419466	0.067	0.021	0.00172141	ENSMUSG00000040483
Chit1	9.41918e-08	0.0204531	0.024	0	0.00189212	ENSMUSG00000026450
Capn6	9.62902e-08	0.111185	0.788	0.717	0.00193428	ENSMUSG00000067276
Scrg1	9.65066e-08	-0.0592959	0.911	0.937	0.00193863	ENSMUSG00000031610
Sgms2	1.00102e-07	0.185793	0.495	0.371	0.00201085	ENSMUSG00000050931
Gm6286	1.11635e-07	-0.0295337	0.085	0.16	0.00224253	ENSMUSG00000086925
Slc5a3	1.15422e-07	-0.0907682	0.591	0.632	0.0023186	ENSMUSG00000089774
Col6a3	1.17162e-07	0.13549	0.932	0.919	0.00235354	ENSMUSG00000048126
Bcl7a	1.17556e-07	-0.127234	0.506	0.557	0.00236147	ENSMUSG00000029438
H2-Q7	1.18447e-07	0.0536206	0.097	0.041	0.00237936	ENSMUSG00000060550
Prkcsh	1.22306e-07	0.112639	0.528	0.401	0.00245689	ENSMUSG00000003402
Col13a1	1.2508e-07	-0.113853	0.121	0.198	0.00251261	ENSMUSG00000058806
Apc	1.36593e-07	-0.11937	0.235	0.318	0.00274388	ENSMUSG00000005871
Bcar1	1.39809e-07	0.076687	0.343	0.229	0.00280849	ENSMUSG00000031955
Plod1	1.4077e-07	0.107125	0.564	0.434	0.0028278	ENSMUSG00000019055
Rps2-ps10	1.41401e-07	0.112752	0.672	0.559	0.00284046	ENSMUSG00000091957
Mtss1l	1.47584e-07	-0.08334	0.684	0.723	0.00296466	ENSMUSG00000033763
Aebp1	1.60301e-07	0.123882	0.553	0.428	0.00322013	ENSMUSG00000020473
mt-Cytb	1.61359e-07	0.0145693	0.997	0.997	0.00324137	ENSMUSG00000064370
Chac1	1.62011e-07	0.0263731	0.061	0.018	0.00325448	ENSMUSG00000027313
Rdx	1.62241e-07	-0.104233	0.654	0.689	0.00325911	ENSMUSG00000032050
Pds5b	1.7458e-07	-0.0909381	0.264	0.345	0.00350695	ENSMUSG00000034021
Canx	1.82829e-07	-0.0809035	0.882	0.901	0.00367267	ENSMUSG00000020368
Akt2	1.90876e-07	0.129787	0.793	0.722	0.00383431	ENSMUSG00000004056
Anxa1	1.99786e-07	0.0968567	0.341	0.239	0.00401331	ENSMUSG00000024659
Gm11572	2.00952e-07	0.030702	0.05	0.012	0.00403672	ENSMUSG00000084368
Tram1	2.06849e-07	-0.0919127	0.711	0.759	0.00415517	ENSMUSG00000025935
Tspan3	2.09775e-07	-0.0467164	0.925	0.937	0.00421397	ENSMUSG00000032324
Slc35b1	2.10747e-07	0.122855	0.551	0.415	0.00423349	ENSMUSG00000020873
Pxdc1	2.11528e-07	0.0465285	0.207	0.12	0.00424917	ENSMUSG00000021411
Dusp11	2.20996e-07	-0.124087	0.497	0.551	0.00443936	ENSMUSG00000030002
Itm2c	2.32279e-07	-0.0625476	0.869	0.89	0.00466601	ENSMUSG00000026223
Timm10b	2.38431e-07	0.102089	0.535	0.42	0.00478961	ENSMUSG00000089847
Scarb1	2.40633e-07	0.104177	0.689	0.569	0.00483384	ENSMUSG00000037936
Dync2h1	2.4225e-07	-0.0922243	0.113	0.183	0.00486632	ENSMUSG00000047193
Pgls	2.7409e-07	0.0835267	0.465	0.335	0.00550592	ENSMUSG00000031807
Gm10689	2.78473e-07	0.0568041	0.14	0.072	0.00559396	ENSMUSG00000074412
Calm1	2.8237e-07	0.114639	0.878	0.838	0.00567225	ENSMUSG00000001175
Tubb4b	2.84362e-07	0.136813	0.6	0.494	0.00571227	ENSMUSG00000036752
Rps18	2.86183e-07	0.0883185	0.934	0.937	0.00574884	ENSMUSG00000008668
Rpl3-ps1	2.9477e-07	-0.0816451	0.282	0.386	0.00592135	ENSMUSG00000084349
52678	2.981e-07	0.0204017	0.075	0.027	0.00598823	NA
Srsf3	2.99529e-07	-0.11406	0.642	0.689	0.00601694	ENSMUSG00000071172
Cox17	3.02741e-07	0.116412	0.72	0.61	0.00608145	ENSMUSG00000046516
Lnpep	3.1467e-07	-0.0891917	0.523	0.566	0.00632109	ENSMUSG00000023845
Cggbp1	3.20982e-07	-0.115701	0.518	0.557	0.00644789	ENSMUSG00000054604
Gm5054	3.24516e-07	0.0304673	0.055	0.016	0.00651887	ENSMUSG00000083812
Zkscan8	3.50773e-07	-0.087663	0.104	0.174	0.00704632	ENSMUSG00000063894
Rpp21	3.50866e-07	0.0593692	0.331	0.222	0.00704821	ENSMUSG00000024446
Plod3	3.54804e-07	0.0820828	0.516	0.392	0.00712731	ENSMUSG00000004846
Baz1b	3.59943e-07	-0.103556	0.473	0.519	0.00723054	ENSMUSG00000002748
Fam162a	3.62557e-07	0.0895783	0.5	0.371	0.00728305	ENSMUSG00000003955
Ddost	3.63659e-07	0.105731	0.759	0.659	0.00730518	ENSMUSG00000028757
Gm45713	3.65168e-07	-0.116136	0.324	0.434	0.00733549	ENSMUSG00000089989
Hspd1	3.6907e-07	-0.0927802	0.573	0.645	0.00741389	ENSMUSG00000025980
Psmd3	3.70533e-07	0.0623537	0.282	0.179	0.00744327	ENSMUSG00000017221
Sema3c	3.80164e-07	-0.104716	0.12	0.192	0.00763674	ENSMUSG00000028780
Hsd17b7	3.89876e-07	-0.123628	0.401	0.462	0.00783183	ENSMUSG00000026675
Tra2a	4.08848e-07	-0.118725	0.271	0.342	0.00821293	ENSMUSG00000029817
Dnlz	4.1671e-07	0.0540169	0.281	0.178	0.00837086	ENSMUSG00000075467
Hoxc8	4.29614e-07	-0.0996104	0.688	0.724	0.00863009	ENSMUSG00000001657
Ndufc1	4.34264e-07	0.0993017	0.675	0.546	0.0087235	ENSMUSG00000037152
Gprasp1	4.39993e-07	-0.112787	0.281	0.357	0.00883858	ENSMUSG00000043384
Pmepa1	4.40612e-07	0.104087	0.504	0.374	0.00885101	ENSMUSG00000038400
Tmem258	4.41728e-07	0.0981483	0.853	0.807	0.00887343	ENSMUSG00000036372
Pabpc4	4.4938e-07	0.113161	0.621	0.519	0.00902714	ENSMUSG00000011257
Prrc2c	4.70352e-07	-0.100403	0.688	0.703	0.00944844	ENSMUSG00000040225
1810058I24Rik	4.82446e-07	0.119539	0.824	0.774	0.00969138	ENSMUSG00000073155
Rps16-ps2	5.58343e-07	-0.120911	0.331	0.442	0.011216	ENSMUSG00000060419
St3gal6	5.60585e-07	-0.094417	0.528	0.578	0.011261	ENSMUSG00000022747
Slc35e3	5.68211e-07	-0.0762408	0.768	0.795	0.0114142	ENSMUSG00000060181
1700020I14Rik	5.80144e-07	-0.0697545	0.647	0.672	0.0116539	ENSMUSG00000085438
Csde1	6.28524e-07	-0.0717274	0.783	0.795	0.0126258	ENSMUSG00000068823
Prkar2b	6.52483e-07	-0.0968053	0.263	0.336	0.0131071	ENSMUSG00000002997
Smarcc2	6.76685e-07	-0.112466	0.457	0.519	0.0135933	ENSMUSG00000025369
Adk	6.80513e-07	0.086776	0.809	0.743	0.0136701	ENSMUSG00000039197
Rps3a3	7.24746e-07	0.040535	0.125	0.062	0.0145587	ENSMUSG00000059751
Cystm1	7.25074e-07	0.133993	0.329	0.237	0.0145653	ENSMUSG00000046727
Ddx6	7.64343e-07	-0.0747268	0.691	0.7	0.0153541	ENSMUSG00000032097
Rom1	7.69302e-07	0.0576945	0.27	0.174	0.0154537	ENSMUSG00000071648
Lrrc58	8.12691e-07	-0.0825809	0.608	0.645	0.0163253	ENSMUSG00000034158
Rpl10a-ps1	8.14787e-07	-0.066428	0.173	0.259	0.0163674	ENSMUSG00000084416
Srsf11	8.31738e-07	-0.0697193	0.821	0.831	0.016708	ENSMUSG00000055436
Ddb1	8.31933e-07	0.0900538	0.688	0.58	0.0167119	ENSMUSG00000024740
C130050O18Rik	8.40398e-07	0.0317743	0.124	0.063	0.0168819	ENSMUSG00000044092
Fstl1	8.46674e-07	0.0962983	0.395	0.289	0.017008	ENSMUSG00000022816
Trp53inp2	8.7114e-07	0.0779976	0.416	0.298	0.0174995	ENSMUSG00000038375
Gm10925	8.85385e-07	-0.00542909	0.996	0.997	0.0177856	ENSMUSG00000100862
Ssb	9.2099e-07	-0.0827686	0.776	0.807	0.0185008	ENSMUSG00000068882
Nyap1	9.29256e-07	0.0357857	0.135	0.07	0.0186669	ENSMUSG00000045348
Fam168a	1.00535e-06	-0.106108	0.501	0.556	0.0201955	ENSMUSG00000029461
Edem1	1.03199e-06	0.076879	0.429	0.315	0.0207307	ENSMUSG00000030104
Dynlt1c	1.03999e-06	0.0482012	0.47	0.359	0.0208913	ENSMUSG00000000579
Efcc1	1.04192e-06	0.0195782	0.047	0.012	0.0209302	ENSMUSG00000068263
Rps12	1.04399e-06	0.0447734	0.964	0.987	0.0209717	ENSMUSG00000061983
Srgn	1.04559e-06	-0.121024	0.227	0.306	0.0210038	ENSMUSG00000020077
Comt	1.06019e-06	0.0936886	0.659	0.531	0.0212971	ENSMUSG00000000326
Snai2	1.11708e-06	-0.106555	0.45	0.506	0.02244	ENSMUSG00000022676
Smurf2	1.13715e-06	-0.101357	0.474	0.521	0.0228431	ENSMUSG00000018363
Mphosph6	1.1618e-06	0.0777215	0.427	0.318	0.0233383	ENSMUSG00000031843
Rspo3	1.18447e-06	-0.108116	0.504	0.563	0.0237937	ENSMUSG00000019880
Mrps16	1.20685e-06	0.0531776	0.315	0.211	0.0242432	ENSMUSG00000049960
Itga6	1.21972e-06	0.0627417	0.272	0.181	0.0245016	ENSMUSG00000027111
Mrpl43	1.22183e-06	0.0574342	0.356	0.244	0.0245441	ENSMUSG00000025208
Tmsb10	1.23625e-06	0.0874331	0.735	0.647	0.0248338	ENSMUSG00000079523
Tmed9	1.25776e-06	0.0853074	0.923	0.892	0.0252658	ENSMUSG00000058569
AC175538.2	1.33343e-06	0.0422359	0.211	0.129	0.0267859	ENSMUSG00000114470
Rps27a-ps2	1.34476e-06	0.0860438	0.306	0.205	0.0270136	ENSMUSG00000058838
Fdps	1.38341e-06	0.0531028	0.428	0.315	0.02779	ENSMUSG00000059743
Rpl38-ps1	1.42078e-06	0.0223557	0.081	0.034	0.0285405	ENSMUSG00000083326
C1qtnf3	1.42749e-06	0.157647	0.403	0.308	0.0286755	ENSMUSG00000058914
Cbx7	1.42988e-06	-0.0387197	0.009	0.041	0.0287234	ENSMUSG00000053411
Vat1l	1.43065e-06	-0.0169507	0	0.021	0.028739	ENSMUSG00000046844
Sdc4	1.4621e-06	-0.0825693	0.901	0.925	0.0293706	ENSMUSG00000017009
Cd63	1.51426e-06	-0.0455036	0.935	0.944	0.0304185	ENSMUSG00000025351
Adm	1.51726e-06	0.0425359	0.034	0.006	0.0304786	ENSMUSG00000030790
Matr3	1.52285e-06	-0.0976949	0.596	0.629	0.0305911	ENSMUSG00000037236
Hoxc10	1.53293e-06	-0.109998	0.56	0.589	0.0307935	ENSMUSG00000022484
Penk	1.56901e-06	-0.0969148	0.068	0.125	0.0315183	ENSMUSG00000045573
Gm7436	1.59828e-06	0.0178987	0.036	0.007	0.0321062	ENSMUSG00000101464
Nutf2-ps1	1.64756e-06	0.0933266	0.674	0.592	0.0330963	ENSMUSG00000071497
Capg	1.67621e-06	0.0281237	0.142	0.076	0.0336717	ENSMUSG00000056737
Slc38a4	1.67703e-06	0.0934961	0.23	0.147	0.0336882	ENSMUSG00000022464
Atp5g1	1.68397e-06	0.0864546	0.757	0.689	0.0338277	ENSMUSG00000006057
Slc16a3	1.69867e-06	0.034874	0.104	0.049	0.034123	ENSMUSG00000025161
9430038I01Rik	1.69961e-06	0.0486165	0.23	0.145	0.0341418	ENSMUSG00000040139
Pla2g16	1.7168e-06	0.0750547	0.078	0.033	0.0344872	ENSMUSG00000060675
Prss35	1.75648e-06	0.0366643	0.053	0.016	0.0352842	ENSMUSG00000033491
Gm20390	1.76657e-06	0.0876531	0.872	0.862	0.0354869	ENSMUSG00000091228
Hnrnpc	1.8144e-06	-0.0532463	0.869	0.882	0.0364477	ENSMUSG00000060373
Cda	1.82855e-06	0.0352003	0.151	0.085	0.0367319	ENSMUSG00000028755
Tuba1c	1.85029e-06	0.126275	0.637	0.519	0.0371686	ENSMUSG00000043091
Cab39l	1.86429e-06	-0.11331	0.649	0.682	0.0374499	ENSMUSG00000021981
Ddx5	1.93804e-06	-0.0366495	0.914	0.928	0.0389314	ENSMUSG00000020719
Enpp2	1.97318e-06	0.177643	0.653	0.557	0.0396373	ENSMUSG00000022425
Cyp26b1	2.10474e-06	0.0460554	0.2	0.121	0.0422799	ENSMUSG00000063415
Tpm1	2.15991e-06	-0.12168	0.687	0.708	0.0433882	ENSMUSG00000032366
Tra2b	2.17606e-06	-0.0853498	0.66	0.689	0.0437127	ENSMUSG00000022858
Fam43a	2.33458e-06	0.121424	0.401	0.3	0.0468971	ENSMUSG00000046546
Mef2d	2.56205e-06	0.0782334	0.41	0.302	0.0514664	ENSMUSG00000001419
Gm28730	2.58856e-06	0.00991109	0.019	0	0.051999	ENSMUSG00000101603
Rap2c	2.70752e-06	-0.105566	0.509	0.559	0.0543886	ENSMUSG00000050029
Rpl19-ps11	2.72335e-06	-0.0874401	0.129	0.199	0.0547066	ENSMUSG00000081094
Tenm2	2.79525e-06	-0.0855591	0.092	0.153	0.056151	ENSMUSG00000049336
Rps13-ps2	2.81062e-06	-0.0607515	0.113	0.186	0.0564598	ENSMUSG00000069972
Rps12-ps4	2.86492e-06	-0.0230742	0.19	0.279	0.0575505	ENSMUSG00000109509
S100a4	2.87245e-06	0.0434814	0.094	0.043	0.0577018	ENSMUSG00000001020
Aldh1l2	2.94196e-06	0.0325068	0.157	0.09	0.0590981	ENSMUSG00000020256
Ranbp2	2.94499e-06	-0.108214	0.26	0.329	0.059159	ENSMUSG00000003226
Tln2	3.06537e-06	-0.098807	0.508	0.541	0.0615771	ENSMUSG00000052698
Mum1l1	3.10809e-06	0.0386292	0.162	0.093	0.0624354	ENSMUSG00000042515
Arf2	3.16193e-06	0.0927516	0.539	0.431	0.0635168	ENSMUSG00000062421
Prdx5	3.17566e-06	0.0974759	0.734	0.641	0.0637927	ENSMUSG00000024953
Polr2e	3.21691e-06	0.0459775	0.229	0.147	0.0646213	ENSMUSG00000004667
Ndufab1	3.24676e-06	0.0848834	0.689	0.586	0.0652208	ENSMUSG00000030869
Yap1	3.29524e-06	-0.0847596	0.563	0.593	0.0661948	ENSMUSG00000053110
Kmt2e	3.38088e-06	-0.0793043	0.797	0.819	0.0679152	ENSMUSG00000029004
Scin	3.44241e-06	0.130403	0.628	0.535	0.0691511	ENSMUSG00000002565
Rpl27a	3.50173e-06	0.0633961	0.957	0.962	0.0703427	ENSMUSG00000046364
Cdc42	3.53579e-06	-0.0371649	0.889	0.903	0.071027	ENSMUSG00000006699
Wipi1	3.63049e-06	0.0804935	0.679	0.591	0.0729293	ENSMUSG00000041895
Vamp8	3.88891e-06	0.0686702	0.437	0.324	0.0781204	ENSMUSG00000050732
Unc5c	3.91541e-06	-0.0740452	0.7	0.731	0.0786527	ENSMUSG00000059921
Gnas	3.91682e-06	0.0376028	0.985	0.986	0.0786812	ENSMUSG00000027523
Sec13	3.99026e-06	0.0848115	0.688	0.576	0.0801563	ENSMUSG00000030298
Msi2	4.07813e-06	-0.0418001	0.889	0.896	0.0819216	ENSMUSG00000069769
Pelo	4.08325e-06	0.0331359	0.212	0.133	0.0820244	ENSMUSG00000042275
Nbeal1	4.10258e-06	-0.0947715	0.338	0.404	0.0824127	ENSMUSG00000073664
Tcf4	4.10355e-06	-0.0935747	0.687	0.707	0.0824322	ENSMUSG00000053477
Rgs4	4.1543e-06	0.0275941	0.034	0.007	0.0834515	ENSMUSG00000038530
Gm5321	4.16029e-06	0.0239506	0.059	0.021	0.0835719	ENSMUSG00000064231
Tmbim1	4.20378e-06	0.092619	0.44	0.336	0.0844456	ENSMUSG00000006301
Unc5b	4.25345e-06	0.131139	0.66	0.557	0.0854433	ENSMUSG00000020099
Bclaf1	4.27006e-06	-0.10614	0.599	0.643	0.085777	ENSMUSG00000037608
Rpl4	4.35049e-06	-0.0467494	0.945	0.967	0.0873926	ENSMUSG00000032399
Ddit4l	4.52765e-06	0.134643	0.339	0.247	0.0909513	ENSMUSG00000046818
Ibsp	4.5455e-06	0.180129	0.424	0.32	0.09131	ENSMUSG00000029306
Ddah1	4.55731e-06	0.0660956	0.284	0.197	0.0915473	ENSMUSG00000028194
Proser2	4.65792e-06	0.0401101	0.112	0.057	0.0935682	ENSMUSG00000045319
Grb14	4.75945e-06	0.120046	0.466	0.367	0.0956078	ENSMUSG00000026888
Anapc4	4.94928e-06	0.0832688	0.446	0.33	0.0994211	ENSMUSG00000029176
Syncrip	4.96063e-06	-0.0740024	0.681	0.701	0.0996491	ENSMUSG00000032423
H2-K1	5.18124e-06	0.126196	0.633	0.528	0.104081	ENSMUSG00000061232
Ptgis	5.30846e-06	0.156379	0.387	0.295	0.106636	ENSMUSG00000017969
Snrpf	5.3908e-06	0.0808608	0.686	0.582	0.10829	ENSMUSG00000020018
Smpdl3b	5.41447e-06	0.0505501	0.187	0.115	0.108766	ENSMUSG00000028885
Rpl41	5.42728e-06	0.0487792	0.983	0.991	0.109023	ENSMUSG00000093674
Ddr2	5.58047e-06	-0.0893828	0.607	0.626	0.1121	ENSMUSG00000026674
Luc7l3	5.59589e-06	-0.0766311	0.625	0.651	0.11241	ENSMUSG00000020863
Gm4734	5.64505e-06	0.022523	0.062	0.023	0.113398	ENSMUSG00000106208
D630045J12Rik	5.69374e-06	0.0327731	0.13	0.071	0.114376	ENSMUSG00000063455
Efemp2	5.79584e-06	0.0977283	0.59	0.481	0.116427	ENSMUSG00000024909
Mt1	5.91718e-06	-0.152309	0.138	0.202	0.118864	ENSMUSG00000031765
Sspn	5.95998e-06	-0.106565	0.696	0.739	0.119724	ENSMUSG00000030255
Gm10269	6.16814e-06	0.0559207	0.072	0.03	0.123906	ENSMUSG00000091449
Yif1a	6.1958e-06	0.0762225	0.499	0.374	0.124461	ENSMUSG00000024875
Syne1	6.27929e-06	-0.0673745	0.14	0.205	0.126138	ENSMUSG00000096054
Nsf	6.31577e-06	0.0769007	0.467	0.342	0.126871	ENSMUSG00000034187
Ipo4	6.44366e-06	0.0571133	0.294	0.198	0.12944	ENSMUSG00000002319
Nsd1	6.5884e-06	-0.0905253	0.373	0.433	0.132348	ENSMUSG00000021488
Mrpl57	6.71109e-06	0.0781018	0.505	0.382	0.134812	ENSMUSG00000021967
Ss18l2	6.78179e-06	0.0730118	0.392	0.293	0.136233	ENSMUSG00000032526
Nek6	6.83967e-06	0.0329993	0.139	0.078	0.137395	ENSMUSG00000026749
Txn1	6.87062e-06	0.0527077	0.863	0.858	0.138017	ENSMUSG00000028367
Ubald2	7.222e-06	0.0570603	0.221	0.143	0.145076	ENSMUSG00000050628
Gm37158	7.26942e-06	-0.0412835	0.185	0.261	0.146028	ENSMUSG00000103234
Rplp0	7.331e-06	0.0517836	0.955	0.967	0.147265	ENSMUSG00000067274
Serinc1	7.34478e-06	-0.0860995	0.619	0.642	0.147542	ENSMUSG00000019877
Lmo4	7.36265e-06	0.11073	0.712	0.62	0.147901	ENSMUSG00000028266
Fhl1	7.58022e-06	0.0390701	0.051	0.017	0.152271	ENSMUSG00000023092
Ganab	7.73744e-06	0.117381	0.685	0.57	0.15543	ENSMUSG00000071650
Ffar4	7.83754e-06	0.0258876	0.017	0	0.157441	ENSMUSG00000054200
Mfge8	7.83782e-06	0.106885	0.936	0.915	0.157446	ENSMUSG00000030605
Pten	7.93647e-06	-0.0889683	0.681	0.697	0.159428	ENSMUSG00000013663
Cdr2l	8.02626e-06	0.0412856	0.116	0.061	0.161231	ENSMUSG00000050910
Ctsh	8.05099e-06	0.0714467	0.392	0.295	0.161728	ENSMUSG00000032359
Dysf	8.09745e-06	0.0492735	0.113	0.06	0.162662	ENSMUSG00000033788
Ptp4a3	8.10496e-06	0.0720575	0.136	0.078	0.162813	ENSMUSG00000059895
Wnt5b	8.18748e-06	0.0932543	0.488	0.38	0.16447	ENSMUSG00000030170
Wsb2	8.22746e-06	0.0605764	0.347	0.247	0.165273	ENSMUSG00000029364
Matn4	8.23216e-06	0.0585883	0.203	0.128	0.165368	ENSMUSG00000016995
Tpi1	8.24886e-06	0.0964406	0.647	0.543	0.165703	ENSMUSG00000023456
Tubb2a	8.25055e-06	0.0915904	0.843	0.809	0.165737	ENSMUSG00000058672
Foxf2	8.27428e-06	-0.0651487	0.099	0.158	0.166214	ENSMUSG00000038402
Gm7990	8.47822e-06	0.0231088	0.049	0.016	0.17031	ENSMUSG00000110595
Gnb4	8.51564e-06	0.0863774	0.464	0.359	0.171062	ENSMUSG00000027669
Cfap97	8.53707e-06	-0.0935658	0.191	0.257	0.171493	ENSMUSG00000031631
Cgref1	8.63509e-06	0.0942561	0.347	0.253	0.173462	ENSMUSG00000029161
Papss2	8.7066e-06	-0.0437256	0.919	0.935	0.174898	ENSMUSG00000024899
Krtcap2	8.7395e-06	0.0959152	0.866	0.843	0.175559	ENSMUSG00000042747
Cox7b	8.76705e-06	0.100237	0.698	0.595	0.176113	ENSMUSG00000031231
Gm28437	8.77849e-06	-0.0335523	0.967	0.978	0.176342	ENSMUSG00000101111
Srsf10	8.9299e-06	-0.0815468	0.475	0.525	0.179384	ENSMUSG00000028676
Bmpr2	8.99461e-06	-0.0979895	0.388	0.433	0.180684	ENSMUSG00000067336
Tnfrsf23	9.02037e-06	0.0446338	0.213	0.136	0.181201	ENSMUSG00000037613
Atrx	9.20888e-06	-0.0645339	0.654	0.684	0.184988	ENSMUSG00000031229
Crip1	9.39674e-06	0.0816742	0.558	0.444	0.188762	ENSMUSG00000006360
Stip1	9.72023e-06	-0.0935083	0.375	0.425	0.19526	ENSMUSG00000024966
Gpsm2	9.73907e-06	0.0886223	0.436	0.324	0.195639	ENSMUSG00000027883
Cdk13	9.75419e-06	-0.069956	0.248	0.312	0.195942	ENSMUSG00000041297
Klhl24	9.87381e-06	0.105031	0.43	0.335	0.198345	ENSMUSG00000062901
Hspb8	9.89255e-06	0.0223332	0.042	0.012	0.198722	ENSMUSG00000041548
Foxo4	9.91526e-06	0.0568044	0.245	0.165	0.199178	ENSMUSG00000042903
Gm5451	9.95898e-06	0.0221308	0.047	0.015	0.200056	ENSMUSG00000095847
Jade2	1.06911e-05	-0.084631	0.271	0.333	0.214763	ENSMUSG00000020387
Plekha1	1.08244e-05	0.0333274	0.292	0.197	0.217442	ENSMUSG00000040268
CR974486.2	1.09246e-05	0.0187316	0.032	0.007	0.219454	ENSMUSG00000114155
Eif3a	1.11269e-05	-0.0673712	0.78	0.801	0.223518	ENSMUSG00000024991
Gm42788	1.1244e-05	0.0244819	0.078	0.035	0.22587	ENSMUSG00000107388
Arid4b	1.16701e-05	-0.0843764	0.576	0.61	0.234429	ENSMUSG00000039219
Gcnt2	1.18664e-05	0.0390195	0.053	0.019	0.238372	ENSMUSG00000021360
Galnt18	1.1991e-05	0.0545955	0.291	0.203	0.240876	ENSMUSG00000038296
Dusp8	1.22617e-05	0.0319617	0.067	0.028	0.246313	ENSMUSG00000037887
Tmem30a	1.23075e-05	-0.0521586	0.869	0.881	0.247233	ENSMUSG00000032328
Ostc	1.2439e-05	0.0596606	0.892	0.883	0.249874	ENSMUSG00000041084
Serbp1	1.25224e-05	-0.0570446	0.859	0.88	0.251551	ENSMUSG00000036371
51910	1.25499e-05	-0.00973878	0.058	0.11	0.252102	NA
Dusp1	1.30858e-05	0.129165	0.512	0.424	0.262867	ENSMUSG00000024190
Zfp24	1.32194e-05	-0.0839804	0.335	0.389	0.265552	ENSMUSG00000051469
Tapbpl	1.32866e-05	0.0764677	0.203	0.136	0.266902	ENSMUSG00000038213
Pdia6	1.34251e-05	0.0952154	0.871	0.838	0.269683	ENSMUSG00000020571
mt-Nd3	1.36719e-05	0.105993	0.989	0.985	0.274641	ENSMUSG00000064360
H2-DMb1	1.39433e-05	0.0556516	0.284	0.196	0.280093	ENSMUSG00000079547
B4galt7	1.44143e-05	0.0694069	0.436	0.317	0.289554	ENSMUSG00000021504
Akr1a1	1.44491e-05	0.070279	0.839	0.805	0.290254	ENSMUSG00000028692
Gstp1	1.44768e-05	0.0887868	0.806	0.746	0.290811	ENSMUSG00000060803
Cnn3	1.47252e-05	-0.0686448	0.783	0.796	0.295801	ENSMUSG00000053931
Slc44a1	1.48524e-05	-0.0921949	0.506	0.535	0.298356	ENSMUSG00000028412
Mthfd2	1.48958e-05	0.0781773	0.41	0.308	0.299227	ENSMUSG00000005667
Pin1	1.52612e-05	0.0558173	0.362	0.263	0.306567	ENSMUSG00000032171
Wisp3	1.54343e-05	-0.0859546	0.255	0.321	0.310045	ENSMUSG00000062074
Ap1m1	1.55499e-05	0.0278537	0.225	0.144	0.312366	ENSMUSG00000003033
Lman1	1.57213e-05	0.0959147	0.843	0.794	0.31581	ENSMUSG00000041891
Plin2	1.61092e-05	0.0286819	0.077	0.035	0.323602	ENSMUSG00000028494
Actr3	1.68303e-05	-0.0588573	0.832	0.864	0.338088	ENSMUSG00000026341
Colec12	1.69094e-05	-0.0738174	0.721	0.726	0.339675	ENSMUSG00000036103
Rab31	1.72409e-05	0.046976	0.243	0.163	0.346336	ENSMUSG00000056515
Luzp1	1.76194e-05	-0.0940861	0.251	0.312	0.353939	ENSMUSG00000001089
Pgd	1.77782e-05	0.0746306	0.329	0.239	0.357128	ENSMUSG00000028961
Rps12-ps5	1.83722e-05	0.0209596	0.112	0.06	0.36906	ENSMUSG00000081565
Atp2b4	1.88794e-05	0.0560472	0.176	0.109	0.379248	ENSMUSG00000026463
Aldh3a1	1.89629e-05	-0.0678984	0.074	0.126	0.380926	ENSMUSG00000019102
Surf4	1.91029e-05	0.0816173	0.775	0.714	0.383738	ENSMUSG00000014867
Tead1	1.93651e-05	-0.0811364	0.328	0.393	0.389007	ENSMUSG00000055320
Mgll	1.93658e-05	0.0166111	0.098	0.05	0.389021	ENSMUSG00000033174
Aebp2	1.94262e-05	-0.0943331	0.398	0.446	0.390233	ENSMUSG00000030232
Rpl17-ps5	1.95438e-05	-0.0450302	0.096	0.159	0.392597	ENSMUSG00000081855
Gm3222	1.99082e-05	0.0418674	0.124	0.071	0.399915	ENSMUSG00000079311
Ocm	2.01019e-05	0.021281	0.1	0.051	0.403807	ENSMUSG00000029618
Mvp	2.08368e-05	0.0358487	0.1	0.052	0.41857	ENSMUSG00000030681
Cds1	2.14258e-05	0.0473778	0.095	0.048	0.430401	ENSMUSG00000029330
Tnrc6b	2.18576e-05	-0.0912221	0.407	0.461	0.439076	ENSMUSG00000047888
Rps16	2.21768e-05	0.0361553	0.941	0.963	0.445488	ENSMUSG00000037563
Vipr2	2.29947e-05	0.0266566	0.05	0.018	0.461917	ENSMUSG00000011171
Usp9x	2.30655e-05	-0.0915408	0.428	0.475	0.463339	ENSMUSG00000031010
Stk39	2.34721e-05	0.102805	0.496	0.4	0.471507	ENSMUSG00000027030
Krtap17-1	2.37983e-05	0.0170014	0.015	0	0.47806	ENSMUSG00000078252
CT030182.4	2.37983e-05	0.0213255	0.015	0	0.47806	ENSMUSG00000114791
Loxl3	2.39997e-05	0.122475	0.74	0.669	0.482106	ENSMUSG00000000693
Nid2	2.40268e-05	0.108558	0.784	0.704	0.48265	ENSMUSG00000021806
Slc38a2	2.42107e-05	0.134427	0.859	0.79	0.486344	ENSMUSG00000022462
Serping1	2.42436e-05	0.0384115	0.147	0.086	0.487006	ENSMUSG00000023224
Gm9531	2.49335e-05	-0.0573622	0.05	0.095	0.500864	ENSMUSG00000079225
Rala	2.53758e-05	0.0640829	0.489	0.382	0.50975	ENSMUSG00000008859
Klhl30	2.55799e-05	0.0223296	0.032	0.008	0.513849	ENSMUSG00000026308
Hspb6	2.58009e-05	0.0343614	0.218	0.142	0.518289	ENSMUSG00000036854
Fam208a	2.61267e-05	-0.0894536	0.157	0.216	0.524832	ENSMUSG00000040651
Clic1	2.6128e-05	0.0485755	0.311	0.222	0.524859	ENSMUSG00000007041
Col5a2	2.62602e-05	0.0923915	0.447	0.346	0.527516	ENSMUSG00000026042
Slc2a13	2.63178e-05	0.0385366	0.113	0.062	0.528672	ENSMUSG00000036298
Taf10	2.74418e-05	0.0680699	0.38	0.284	0.551252	ENSMUSG00000043866
Ppfibp1	2.74663e-05	0.0991642	0.647	0.538	0.551744	ENSMUSG00000016487
Tmed10	2.76844e-05	-0.0564778	0.888	0.913	0.556125	ENSMUSG00000021248
Mme	2.78914e-05	-0.0460791	0.041	0.084	0.560283	ENSMUSG00000027820
1810055G02Rik	2.81452e-05	0.0807763	0.498	0.382	0.565382	ENSMUSG00000035372
Lars	2.83467e-05	0.0270556	0.217	0.14	0.569428	ENSMUSG00000024493
Chchd2	2.97023e-05	0.0628375	0.901	0.902	0.596659	ENSMUSG00000070493
Gm8292	2.98187e-05	0.0210934	0.049	0.017	0.598998	ENSMUSG00000100215
Ccdc88c	2.99461e-05	0.0568816	0.176	0.113	0.601558	ENSMUSG00000021182
53305	3.00176e-05	-0.0309341	0.027	0.064	0.602993	NA
Tspan2	3.01573e-05	0.0689626	0.339	0.252	0.605799	ENSMUSG00000027858
Chpf2	3.02188e-05	0.0491769	0.255	0.172	0.607034	ENSMUSG00000038181
Ccl3	3.05599e-05	-0.0137411	0	0.016	0.613886	ENSMUSG00000000982
Letm2	3.07051e-05	-0.0572822	0.065	0.113	0.616803	ENSMUSG00000037363
Inppl1	3.07302e-05	0.07866	0.264	0.186	0.617308	ENSMUSG00000032737
Ybx1	3.11688e-05	0.0309858	0.927	0.94	0.626119	ENSMUSG00000028639
Mycbp	3.14819e-05	0.0582085	0.274	0.191	0.632408	ENSMUSG00000028647
Gnai3	3.17874e-05	-0.0765515	0.623	0.653	0.638544	ENSMUSG00000000001
Lias	3.18784e-05	0.0437365	0.327	0.232	0.640372	ENSMUSG00000029199
Gabpb1	3.26236e-05	0.0539556	0.248	0.169	0.655342	ENSMUSG00000027361
Actg1	3.26862e-05	-0.0438935	0.969	0.985	0.656601	ENSMUSG00000062825
Snhg3	3.27635e-05	0.071464	0.584	0.466	0.658153	ENSMUSG00000085241
Maff	3.2911e-05	0.0266185	0.086	0.042	0.661116	ENSMUSG00000042622
Atp5j	3.31769e-05	0.071476	0.779	0.717	0.666458	ENSMUSG00000022890
Gabarap	3.32026e-05	0.0704782	0.91	0.903	0.666973	ENSMUSG00000018567
Eid1	3.40546e-05	-0.0587576	0.862	0.893	0.684089	ENSMUSG00000091337
Dcaf10	3.48137e-05	0.0879727	0.418	0.318	0.699338	ENSMUSG00000035572
2011-09-01	3.5021e-05	0.0465581	0.291	0.204	0.703502	ENSMUSG00000058013
Tgfb1i1	3.50945e-05	-0.0954833	0.212	0.27	0.704979	ENSMUSG00000030782
Ftl1	3.55393e-05	0.0807141	0.927	0.935	0.713913	ENSMUSG00000050708
Zfp704	3.59085e-05	-0.0534557	0.105	0.161	0.721331	ENSMUSG00000040209
Atn1	3.62396e-05	-0.0799285	0.562	0.594	0.727982	ENSMUSG00000004263
Slc25a10	3.67986e-05	0.0664877	0.298	0.213	0.739211	ENSMUSG00000025792
Id2	3.68719e-05	-0.14189	0.572	0.605	0.740682	ENSMUSG00000020644
Epas1	3.693e-05	0.0250659	0.155	0.094	0.741849	ENSMUSG00000024140
Guk1	3.69792e-05	0.0386628	0.312	0.223	0.742838	ENSMUSG00000020444
Uqcr11	3.73863e-05	0.0807015	0.581	0.476	0.751016	ENSMUSG00000020163
S100a10	3.76304e-05	0.0791447	0.788	0.729	0.75592	ENSMUSG00000041959
2010107E04Rik	3.80681e-05	0.0843663	0.682	0.563	0.764712	ENSMUSG00000021290
Prelid1	3.89578e-05	0.0859736	0.624	0.526	0.782584	ENSMUSG00000021486
Mgea5	4.09153e-05	0.0515282	0.366	0.267	0.821907	ENSMUSG00000025220
Ppbp	4.20556e-05	-0.0687055	0.014	0.041	0.844812	ENSMUSG00000029372
Gm10247	4.21118e-05	0.0405016	0.07	0.032	0.845941	ENSMUSG00000068674
Gm8667	4.22364e-05	0.0347025	0.14	0.083	0.848446	ENSMUSG00000109712
Tuba1b	4.2327e-05	0.0992466	0.57	0.476	0.850266	ENSMUSG00000023004
Chd4	4.3695e-05	-0.0480479	0.77	0.773	0.877746	ENSMUSG00000063870
Mafk	4.39231e-05	0.0514618	0.188	0.123	0.882328	ENSMUSG00000018143
P4hb	4.40006e-05	0.0495375	0.949	0.95	0.883884	ENSMUSG00000025130
R3hdml	4.53395e-05	0.102043	0.356	0.266	0.91078	ENSMUSG00000078949
Psma5	4.59768e-05	0.0506187	0.406	0.301	0.923583	ENSMUSG00000068749
Atf2	4.66111e-05	-0.0795506	0.286	0.349	0.936323	ENSMUSG00000027104
Tmed1	4.68067e-05	0.0546741	0.372	0.27	0.940253	ENSMUSG00000032180
Klhl5	4.69941e-05	0.0933305	0.472	0.372	0.944017	ENSMUSG00000054920
Gm9013	4.7051e-05	0.0268012	0.057	0.023	0.94516	ENSMUSG00000087286
Lipg	4.766e-05	0.0315174	0.028	0.006	0.957394	ENSMUSG00000053846
Zkscan3	4.7758e-05	-0.0935234	0.213	0.272	0.959363	ENSMUSG00000021327
Mrps5	4.84006e-05	0.0392979	0.208	0.139	0.972271	ENSMUSG00000027374
Bod1	4.88859e-05	0.0994758	0.618	0.511	0.98202	ENSMUSG00000044502
Alpl	4.90639e-05	0.146919	0.742	0.667	0.985595	ENSMUSG00000028766
Zfand2b	4.94756e-05	0.0261467	0.081	0.04	0.993866	ENSMUSG00000026197
Zmiz1	4.95757e-05	-0.0988298	0.582	0.617	0.995876	ENSMUSG00000007817
Bmp4	4.9603e-05	0.00940643	0.03	0.007	0.996424	ENSMUSG00000021835
Mmp13	5.01816e-05	0.0800376	0.127	0.074	1	ENSMUSG00000050578
Gm45397	5.03752e-05	0.0611043	0.222	0.149	1	ENSMUSG00000109973
Rps12-ps9	5.05702e-05	-0.0245109	0.122	0.188	1	ENSMUSG00000069862
Ndufb9	5.20803e-05	0.0641743	0.436	0.33	1	ENSMUSG00000022354
Gm6030	5.42971e-05	0.0147936	0.039	0.012	1	ENSMUSG00000062284
Mars	5.51778e-05	0.0793439	0.351	0.261	1	ENSMUSG00000040354
Gak	5.56569e-05	0.0308359	0.229	0.154	1	ENSMUSG00000062234
Irs1	5.60463e-05	-0.0946756	0.588	0.61	1	ENSMUSG00000055980
Gng5	5.70767e-05	0.0736706	0.914	0.917	1	ENSMUSG00000068523
Ybx3	5.71841e-05	-0.0941648	0.662	0.693	1	ENSMUSG00000030189
Kansl1	5.90093e-05	-0.0866309	0.293	0.342	1	ENSMUSG00000018412
Enho	5.90859e-05	0.0312165	0.07	0.033	1	ENSMUSG00000028445
Hnrnpm	6.02199e-05	-0.0706241	0.657	0.675	1	ENSMUSG00000059208
Ptx3	6.08148e-05	0.0290616	0.047	0.017	1	ENSMUSG00000027832
4631405J19Rik	6.11351e-05	0.0473223	0.081	0.041	1	ENSMUSG00000075027
Cercam	6.1753e-05	0.0799887	0.302	0.225	1	ENSMUSG00000039787
Top1	6.20841e-05	-0.0583728	0.775	0.791	1	ENSMUSG00000070544
Atf5	6.22563e-05	0.0465019	0.25	0.173	1	ENSMUSG00000038539
Zfp318	6.22714e-05	-0.0719925	0.226	0.284	1	ENSMUSG00000015597
Cd109	6.40392e-05	0.092233	0.685	0.572	1	ENSMUSG00000046186
Mrpl20	6.44413e-05	0.0369716	0.268	0.185	1	ENSMUSG00000029066
Polr2l	6.45145e-05	0.0481328	0.533	0.435	1	ENSMUSG00000038489
Pebp1	6.52326e-05	-0.0630299	0.741	0.742	1	ENSMUSG00000032959
Phldb1	6.5261e-05	0.0538116	0.307	0.22	1	ENSMUSG00000048537
Cox7c	6.53047e-05	0.0607932	0.911	0.915	1	ENSMUSG00000017778
Sltm	6.74625e-05	-0.107303	0.405	0.442	1	ENSMUSG00000032212
Rpl38	6.81897e-05	0.038402	0.939	0.959	1	ENSMUSG00000057322
Zfp982	6.83578e-05	-0.019386	0.011	0.036	1	ENSMUSG00000078496
Piezo1	7.05723e-05	0.0787036	0.26	0.185	1	ENSMUSG00000014444
Numbl	7.06034e-05	0.0418618	0.203	0.136	1	ENSMUSG00000063160
Hs3st3a1	7.11186e-05	-0.104335	0.411	0.464	1	ENSMUSG00000047759
Rsu1	7.11428e-05	-0.0848556	0.486	0.514	1	ENSMUSG00000026727
Golim4	7.13245e-05	-0.0738466	0.599	0.62	1	ENSMUSG00000034109
Olfml3	7.14123e-05	0.068181	0.572	0.459	1	ENSMUSG00000027848
Gm15271	7.25493e-05	0.0117107	0.014	0	1	ENSMUSG00000086148
Cldn14	7.25493e-05	0.00902161	0.014	0	1	ENSMUSG00000047109
54001	7.25493e-05	0.0109363	0.014	0	1	NA
Dcx	7.25493e-05	0.00873546	0.014	0	1	ENSMUSG00000031285
Lpin1	7.29442e-05	0.0503872	0.216	0.147	1	ENSMUSG00000020593
Lrp6	7.31994e-05	-0.0813295	0.34	0.393	1	ENSMUSG00000030201
Mia	7.40039e-05	-0.0228621	0.948	0.961	1	ENSMUSG00000089661
Gm11478	7.51922e-05	0.0337278	0.098	0.053	1	ENSMUSG00000083992
Gm17826	7.57919e-05	0.0199051	0.084	0.042	1	ENSMUSG00000099423
Atp5g3	7.6254e-05	0.0670423	0.852	0.833	1	ENSMUSG00000018770
Gm6222	7.71486e-05	0.0154095	0.029	0.007	1	ENSMUSG00000083019
Cox6c	7.78043e-05	0.0976113	0.854	0.817	1	ENSMUSG00000014313
Egln1	7.80709e-05	0.0522593	0.492	0.388	1	ENSMUSG00000031987
Hoxa9	7.81227e-05	-0.119805	0.331	0.381	1	ENSMUSG00000038227
Sfn	7.83339e-05	0.0211912	0.048	0.018	1	ENSMUSG00000047281
Steap1	7.83975e-05	0.0874947	0.556	0.456	1	ENSMUSG00000015652
Rcc2	7.98529e-05	0.049696	0.362	0.264	1	ENSMUSG00000040945
Malat1	8.18234e-05	-0.00243135	0.92	0.937	1	ENSMUSG00000092341
Gpc6	8.27561e-05	-0.0939512	0.307	0.353	1	ENSMUSG00000058571
Ndufa1	8.27934e-05	0.0923871	0.824	0.773	1	ENSMUSG00000016427
Ctsl	8.31529e-05	0.0654242	0.343	0.253	1	ENSMUSG00000021477
Stag2	8.31637e-05	-0.094918	0.47	0.499	1	ENSMUSG00000025862
Eif3j2	8.44083e-05	-0.0743831	0.491	0.531	1	ENSMUSG00000043424
Cyp1b1	8.46913e-05	0.0171565	0.056	0.023	1	ENSMUSG00000024087
Idh2	8.54994e-05	0.057101	0.318	0.231	1	ENSMUSG00000030541
Msl2	8.59187e-05	-0.0834019	0.282	0.33	1	ENSMUSG00000066415
Tceal9	8.6305e-05	0.0696765	0.845	0.788	1	ENSMUSG00000042712
Hypk	8.84263e-05	0.0401888	0.228	0.157	1	ENSMUSG00000027245
Smarca2	8.91699e-05	-0.0901296	0.533	0.558	1	ENSMUSG00000024921
Stk38	8.95973e-05	-0.0771782	0.24	0.299	1	ENSMUSG00000024006
Gm4631	9.06741e-05	-0.0762445	0.32	0.378	1	ENSMUSG00000078899
Gm4852	9.06782e-05	-0.00717823	0.005	0.026	1	ENSMUSG00000081185
Sfrp1	9.09838e-05	0.0252226	0.023	0.004	1	ENSMUSG00000031548
Mxra8	9.11873e-05	-0.0898125	0.401	0.447	1	ENSMUSG00000029070
Cyb5r3	9.14242e-05	0.0720136	0.456	0.356	1	ENSMUSG00000018042
Car5b	9.14436e-05	0.0361108	0.124	0.073	1	ENSMUSG00000031373
Tmem97	9.26699e-05	0.0616288	0.566	0.474	1	ENSMUSG00000037278
Aldoa	9.30508e-05	0.0707656	0.86	0.838	1	ENSMUSG00000030695
Rpl18	9.74841e-05	0.0741169	0.894	0.871	1	ENSMUSG00000059070
Ift20	9.77808e-05	0.0744818	0.806	0.766	1	ENSMUSG00000001105
Tmem45a	9.80128e-05	0.063704	0.528	0.429	1	ENSMUSG00000022754
Dynlt1b	9.8289e-05	0.0217815	0.442	0.346	1	ENSMUSG00000096255
Alkbh3	9.85665e-05	0.0242811	0.143	0.089	1	ENSMUSG00000040174
53551	9.97119e-05	-0.00945761	0.041	0.081	1	NA
Gm8624	0.00010071	0.0609147	0.222	0.151	1	ENSMUSG00000083705
Npr2	0.000101866	-0.100781	0.473	0.503	1	ENSMUSG00000028469
Entpd4	0.000102679	0.0559515	0.368	0.275	1	ENSMUSG00000095463
Plcd1	0.00010463	0.0611376	0.395	0.298	1	ENSMUSG00000010660
S100b	0.000105483	0.0794727	0.764	0.703	1	ENSMUSG00000033208
Wisp1	0.00010558	0.07711	0.296	0.215	1	ENSMUSG00000005124
Ndufs1	0.000106225	0.0619831	0.388	0.292	1	ENSMUSG00000025968
Tmed2	0.000106424	0.0726258	0.861	0.827	1	ENSMUSG00000029390
Atp1b3	0.000106453	0.158934	0.901	0.858	1	ENSMUSG00000032412
Scara3	0.000107579	-0.0943867	0.211	0.273	1	ENSMUSG00000034463
Dbndd2	0.000108793	0.022937	0.282	0.201	1	ENSMUSG00000017734
Slc39a13	0.000109483	0.0669801	0.418	0.324	1	ENSMUSG00000002105
Pitpnb	0.000110267	-0.0815086	0.263	0.316	1	ENSMUSG00000050017
Plscr4	0.000110566	-0.0849347	0.23	0.286	1	ENSMUSG00000032377
Ift57	0.000110953	-0.0821212	0.195	0.248	1	ENSMUSG00000032965
Grpel1	0.000111256	0.0557614	0.318	0.234	1	ENSMUSG00000029198
Sertad1	0.00011169	0.0283943	0.229	0.154	1	ENSMUSG00000008384
Pde4dip	0.000112169	-0.0593303	0.664	0.672	1	ENSMUSG00000038170
Xpa	0.000112613	0.0223795	0.138	0.084	1	ENSMUSG00000028329
Kif1b	0.000113236	-0.0697285	0.338	0.391	1	ENSMUSG00000063077
Pcm1	0.000113421	-0.0844533	0.385	0.427	1	ENSMUSG00000031592
Chkb	0.000115236	0.0160175	0.197	0.13	1	ENSMUSG00000022617
Ndfip1	0.000116722	-0.0579019	0.675	0.686	1	ENSMUSG00000024425
Piezo2	0.000117606	-0.0389093	0.009	0.032	1	ENSMUSG00000041482
Eif2s2	0.000118726	0.0582407	0.854	0.852	1	ENSMUSG00000074656
Mphosph10	0.000118965	-0.0895334	0.239	0.29	1	ENSMUSG00000030521
Tcea1	0.000119315	-0.0825495	0.73	0.734	1	ENSMUSG00000033813
Ndrg4	0.000119452	0.0270567	0.107	0.06	1	ENSMUSG00000036564
Zmynd11	0.00011995	-0.0712587	0.641	0.651	1	ENSMUSG00000021156
Nktr	0.000123268	-0.0738291	0.527	0.546	1	ENSMUSG00000032525
Phex	0.000123676	0.0443755	0.13	0.079	1	ENSMUSG00000057457
Phyh	0.000124129	0.075321	0.555	0.454	1	ENSMUSG00000026664
Smoc2	0.000124887	0.127451	0.282	0.217	1	ENSMUSG00000023886
Abca8a	0.000125714	-0.0290783	0.023	0.054	1	ENSMUSG00000041828
Rpl35a-ps5	0.000126664	0.0483015	0.069	0.034	1	ENSMUSG00000093885
Vwa3b	0.000126917	0.0108879	0.013	0	1	ENSMUSG00000050122
Klk10	0.000126917	0.00972962	0.013	0	1	ENSMUSG00000030693
Gm10629	0.000126917	0.0120764	0.013	0	1	ENSMUSG00000074113
F630206G17Rik	0.000126917	0.00792643	0.013	0	1	ENSMUSG00000086686
Comp	0.000127176	0.0936138	0.978	0.979	1	ENSMUSG00000031849
Cst3	0.00012755	-0.0192147	0.994	0.993	1	ENSMUSG00000027447
Shmt2	0.000128191	0.0657412	0.501	0.397	1	ENSMUSG00000025403
Trmt112-ps2	0.000128779	-0.0276608	0.051	0.091	1	ENSMUSG00000070572
Flrt2	0.000129729	-0.0760464	0.102	0.151	1	ENSMUSG00000047414
Zfp148	0.000130212	-0.0883335	0.448	0.481	1	ENSMUSG00000022811
Trip11	0.000130263	-0.0890723	0.494	0.532	1	ENSMUSG00000021188
Gm13039	0.000130595	-0.0141431	0.041	0.079	1	ENSMUSG00000083826
51537	0.000131115	0.0215278	0.04	0.014	1	NA
Huwe1	0.000131754	-0.0656631	0.539	0.56	1	ENSMUSG00000025261
Car3	0.000131866	0.015395	0.044	0.016	1	ENSMUSG00000027559
BC030870	0.000132763	-0.0900852	0.336	0.385	1	ENSMUSG00000074300
Gfra1	0.000133597	-0.0523437	0.09	0.138	1	ENSMUSG00000025089
Ppp1r14b	0.000134488	0.0405827	0.43	0.343	1	ENSMUSG00000056612
Hectd2	0.000135548	-0.0540372	0.087	0.135	1	ENSMUSG00000041180
Smarcc1	0.000135763	-0.0918752	0.358	0.403	1	ENSMUSG00000032481
Pura	0.000136296	-0.0653781	0.812	0.804	1	ENSMUSG00000043991
Ran	0.000136442	0.0584158	0.864	0.844	1	ENSMUSG00000029430
Zfp266	0.000136674	0.0458059	0.375	0.277	1	ENSMUSG00000060510
Mmp9	0.000139847	0.0209023	0.026	0.006	1	ENSMUSG00000017737
Swap70	0.000142249	0.0346595	0.262	0.186	1	ENSMUSG00000031015
Ptprn2	0.000142705	-0.0110372	0	0.013	1	ENSMUSG00000056553
CT009757.7	0.000142705	-0.010365	0	0.013	1	ENSMUSG00000114104
Srp19	0.000142918	0.100465	0.744	0.666	1	ENSMUSG00000014504
Rpa3	0.000143508	0.0457658	0.387	0.292	1	ENSMUSG00000012483
Birc6	0.000144468	-0.0727218	0.499	0.534	1	ENSMUSG00000024073
AC122539.3	0.000148301	0.0203885	0.072	0.035	1	ENSMUSG00000112806
Bmp2	0.000149514	0.0609395	0.151	0.097	1	ENSMUSG00000027358
Uqcrc1	0.000153479	0.0345433	0.298	0.215	1	ENSMUSG00000025651
Hist1h2ag	0.000156421	-0.0103501	0.032	0.066	1	ENSMUSG00000069301
Lrrfip1	0.000156949	0.0267446	0.188	0.125	1	ENSMUSG00000026305
Sfrp4	0.000158064	0.0172135	0.048	0.019	1	ENSMUSG00000021319
Gm14539	0.000159536	-0.0271964	0.08	0.129	1	ENSMUSG00000084830
C2	0.000160602	0.0109482	0.031	0.009	1	ENSMUSG00000024371
Sdc2	0.000160762	-0.0711138	0.712	0.721	1	ENSMUSG00000022261
Rabggtb	0.000161515	0.0507057	0.496	0.394	1	ENSMUSG00000038975
Ccdc122	0.000163348	0.0565346	0.188	0.128	1	ENSMUSG00000034795
Gm37108	0.000163469	0.0326483	0.103	0.059	1	ENSMUSG00000102135
B230217C12Rik	0.000164291	-0.0750613	0.167	0.217	1	ENSMUSG00000050538
Vdr	0.000164557	0.0563789	0.316	0.231	1	ENSMUSG00000022479
Ripor3	0.000164685	0.0189502	0.038	0.013	1	ENSMUSG00000074577
Nr1d1	0.00016485	0.0695575	0.295	0.218	1	ENSMUSG00000020889
Yes1	0.000167328	-0.0510148	0.091	0.137	1	ENSMUSG00000014932
Eri3	0.000167489	0.0501805	0.411	0.312	1	ENSMUSG00000033423
Fbxo17	0.000167648	0.047402	0.263	0.187	1	ENSMUSG00000030598
Sipa1l1	0.000167914	-0.0815452	0.221	0.275	1	ENSMUSG00000042700
Wwp1	0.000169612	-0.0723815	0.279	0.33	1	ENSMUSG00000041058
Tjap1	0.000171243	0.0394028	0.215	0.148	1	ENSMUSG00000012296
Trpm7	0.000171441	-0.089066	0.444	0.471	1	ENSMUSG00000027365
Snta1	0.00017342	0.0382913	0.093	0.051	1	ENSMUSG00000027488
Dpep1	0.000173483	0.0209136	0.029	0.008	1	ENSMUSG00000019278
1110065P20Rik	0.000175555	0.0548684	0.37	0.277	1	ENSMUSG00000078570
P3h1	0.000177938	0.0809298	0.722	0.631	1	ENSMUSG00000028641
Med13	0.000178293	-0.0409642	0.318	0.369	1	ENSMUSG00000034297
Urm1	0.000178925	0.0522339	0.285	0.207	1	ENSMUSG00000069020
Prune1	0.000179723	0.0408157	0.166	0.107	1	ENSMUSG00000015711
Sobp	0.000180233	-0.0669269	0.813	0.832	1	ENSMUSG00000038248
Dbi	0.000180352	-0.0835435	0.824	0.849	1	ENSMUSG00000026385
Map7d3	0.00018093	0.036614	0.138	0.086	1	ENSMUSG00000067878
Rpl7a	0.000181022	0.0753736	0.897	0.893	1	ENSMUSG00000062647
Gm20498	0.000181568	0.0311676	0.397	0.299	1	ENSMUSG00000021139
Hipk2	0.000182237	-0.0788561	0.241	0.298	1	ENSMUSG00000061436
Gm8927	0.000182241	0.00729626	0.014	0.001	1	ENSMUSG00000098187
Gna12	0.000183455	0.0839535	0.518	0.415	1	ENSMUSG00000000149
Ctcf	0.000185896	-0.0733263	0.469	0.497	1	ENSMUSG00000005698
Pdcd4	0.00018761	-0.0551728	0.761	0.761	1	ENSMUSG00000024975
Slc16a4	0.00018935	-0.0884672	0.32	0.369	1	ENSMUSG00000027896
Trmt1	0.000189527	0.0219072	0.119	0.071	1	ENSMUSG00000001909
Ephx1	0.000189855	0.046673	0.141	0.09	1	ENSMUSG00000038776
Socs5	0.000190383	-0.0860042	0.427	0.466	1	ENSMUSG00000037104
Slc39a11	0.000190868	0.0932259	0.535	0.444	1	ENSMUSG00000041654
Sypl	0.000191021	-0.0422732	0.704	0.709	1	ENSMUSG00000020570
Rpl5-ps2	0.000191036	0.0297156	0.117	0.07	1	ENSMUSG00000082064
Sos1	0.00019138	-0.0708797	0.159	0.212	1	ENSMUSG00000024241
Runx3	0.000194546	-0.0714904	0.72	0.752	1	ENSMUSG00000070691
Klhdc2	0.000195036	0.0453456	0.377	0.277	1	ENSMUSG00000020978
Kansl1l	0.00019687	-0.0656632	0.091	0.136	1	ENSMUSG00000026004
Zhx3	0.000197047	-0.0770233	0.196	0.249	1	ENSMUSG00000035877
Basp1	0.000198075	0.0346695	0.044	0.017	1	ENSMUSG00000045763
Chid1	0.00019879	0.0375748	0.167	0.11	1	ENSMUSG00000025512
Rint1	0.000199006	0.0614798	0.252	0.183	1	ENSMUSG00000028999
Fam89a	0.000203754	0.0599043	0.485	0.389	1	ENSMUSG00000043068
Pemt	0.000204183	0.0428066	0.096	0.054	1	ENSMUSG00000000301
Lmo7	0.000204383	-0.0929914	0.491	0.505	1	ENSMUSG00000033060
Samhd1	0.000204775	0.0841996	0.405	0.324	1	ENSMUSG00000027639
Gm8618	0.000207987	0.0207963	0.041	0.016	1	ENSMUSG00000073559
Itm2b	0.00020931	-0.0619689	0.921	0.948	1	ENSMUSG00000022108
Swi5	0.000209412	0.0566376	0.782	0.726	1	ENSMUSG00000044627
Impdh1	0.000210882	0.0444374	0.212	0.148	1	ENSMUSG00000003500
Scp2	0.00021149	-0.0716558	0.656	0.669	1	ENSMUSG00000028603
Gm15727	0.000211874	0.0758428	0.311	0.232	1	ENSMUSG00000081274
Esm1	0.000212962	0.0264458	0.032	0.009	1	ENSMUSG00000042379
Ssr3	0.000213495	0.0536009	0.919	0.915	1	ENSMUSG00000027828
Gm20458	0.000217083	0.0214827	0.275	0.198	1	ENSMUSG00000090996
Rpl36al	0.000217182	0.0793487	0.822	0.772	1	ENSMUSG00000049751
Cbll1	0.000217372	-0.0710696	0.139	0.187	1	ENSMUSG00000020659
Rab27b	0.000217498	0.0416048	0.099	0.057	1	ENSMUSG00000024511
Gm9825	0.000218233	-0.0198443	0.018	0.045	1	ENSMUSG00000096403
BC004004	0.000218588	0.0752228	0.517	0.434	1	ENSMUSG00000052712
Supt20	0.00021982	-0.0712996	0.26	0.311	1	ENSMUSG00000027751
Tiam2	0.000220547	0.0493293	0.258	0.185	1	ENSMUSG00000023800
Hp1bp3	0.000222306	-0.0876594	0.7	0.686	1	ENSMUSG00000028759
Slc9a4	0.000222386	0.0143899	0.012	0	1	ENSMUSG00000026065
Gm31048	0.000222386	0.00856655	0.012	0	1	ENSMUSG00000105615
4930570D08Rik	0.000222386	0.00727759	0.012	0	1	ENSMUSG00000084875
Htra1	0.000225732	-0.0780669	0.364	0.411	1	ENSMUSG00000006205
Psma7	0.000225753	0.0746411	0.58	0.475	1	ENSMUSG00000027566
Rnh1	0.000228754	0.0437748	0.266	0.192	1	ENSMUSG00000038650
Tyk2	0.000231637	0.0212367	0.05	0.022	1	ENSMUSG00000032175
Hr	0.000231693	0.0264823	0.185	0.122	1	ENSMUSG00000022096
Fgfr1op2	0.000231817	-0.0569637	0.743	0.748	1	ENSMUSG00000040242
Alyref	0.000231904	0.065763	0.35	0.265	1	ENSMUSG00000025134
Wdr34	0.000232311	0.0168663	0.094	0.052	1	ENSMUSG00000039715
Gramd4	0.000234777	0.0379089	0.108	0.064	1	ENSMUSG00000035900
Ccdc88a	0.00023628	-0.0357529	0.847	0.85	1	ENSMUSG00000032740
Cnot1	0.000237314	-0.0684028	0.289	0.338	1	ENSMUSG00000036550
Cpa3	0.000239122	-0.0153182	0	0.012	1	ENSMUSG00000001865
Fam221b	0.000239122	-0.010715	0	0.012	1	ENSMUSG00000043633
AC118202.1	0.000239122	-0.0107825	0	0.012	1	ENSMUSG00000111888
AC153912.1	0.000239122	-0.00679124	0	0.012	1	ENSMUSG00000110723
Otx1	0.000239122	-0.0128882	0	0.012	1	ENSMUSG00000005917
Ccl4	0.000239122	-0.0115465	0	0.012	1	ENSMUSG00000018930
Gpc4	0.000239847	0.0330257	0.18	0.119	1	ENSMUSG00000031119
Hbb-bt	0.0002441	-0.0171456	0.006	0.026	1	ENSMUSG00000073940
Gas2l1	0.000244535	0.0497086	0.223	0.158	1	ENSMUSG00000034201
Usf2	0.000245367	0.0667999	0.664	0.55	1	ENSMUSG00000058239
Atp5l	0.000247446	0.0614613	0.811	0.774	1	ENSMUSG00000038717
Gba	0.000248099	0.0770943	0.361	0.274	1	ENSMUSG00000028048
Ywhag	0.000248573	-0.0813238	0.518	0.543	1	ENSMUSG00000051391
Cd68	0.000251098	0.029792	0.068	0.034	1	ENSMUSG00000018774
Ogfr	0.000252319	0.0447786	0.193	0.131	1	ENSMUSG00000049401
2900097C17Rik	0.000252478	-0.067933	0.747	0.764	1	ENSMUSG00000102869
Arhgap1	0.000252659	0.030597	0.268	0.192	1	ENSMUSG00000027247
Pom121	0.000252964	-0.0839984	0.221	0.272	1	ENSMUSG00000053293
Sec22b	0.000253849	0.0692838	0.681	0.584	1	ENSMUSG00000027879
Slc39a7	0.000253901	0.0714494	0.724	0.682	1	ENSMUSG00000024327
Slco2b1	0.000254043	0.0593994	0.123	0.077	1	ENSMUSG00000030737
Cd24a	0.00025452	0.109324	0.685	0.601	1	ENSMUSG00000047139
Manf	0.000254783	0.0716953	0.704	0.627	1	ENSMUSG00000032575
Rps12-ps19	0.000254929	0.0249397	0.149	0.096	1	ENSMUSG00000082481
53772	0.000256067	0.0178846	0.065	0.032	1	NA
Ip6k1	0.000257155	0.0616755	0.36	0.273	1	ENSMUSG00000032594
Ncor1	0.000262602	-0.0679051	0.634	0.652	1	ENSMUSG00000018501
Raf1	0.000263269	0.0995438	0.352	0.279	1	ENSMUSG00000000441
Colgalt2	0.000266039	-0.0522162	0.824	0.842	1	ENSMUSG00000032649
Fam120c	0.000267693	-0.0385497	0.043	0.079	1	ENSMUSG00000025262
Eif5	0.000271003	-0.0795383	0.746	0.775	1	ENSMUSG00000021282
Lingo1	0.000273926	-0.0890177	0.333	0.38	1	ENSMUSG00000049556
1810024B03Rik	0.000275233	0.0299952	0.168	0.11	1	ENSMUSG00000044145
Tnfsf11	0.000275289	-0.0365545	0.013	0.036	1	ENSMUSG00000022015
Setd2	0.000279504	-0.0691564	0.454	0.485	1	ENSMUSG00000044791
Tmem18	0.000283264	0.0216056	0.098	0.056	1	ENSMUSG00000043061
Ap3s1-ps1	0.000286673	-0.0202683	0.024	0.053	1	ENSMUSG00000085611
Sh3bp2	0.00028964	0.0305578	0.144	0.092	1	ENSMUSG00000054520
51669	0.000290819	0.0346646	0.401	0.315	1	NA
Ndufa5	0.000291172	0.0668749	0.42	0.33	1	ENSMUSG00000023089
Kmt2d	0.000291235	-0.0840184	0.296	0.34	1	ENSMUSG00000048154
Sil1	0.00029238	0.0634219	0.42	0.325	1	ENSMUSG00000024357
Chsy1	0.000295727	0.0577055	0.3	0.225	1	ENSMUSG00000032640
Npm3	0.000297544	-0.0881278	0.528	0.555	1	ENSMUSG00000056209
Spsb2	0.000300054	0.0232319	0.085	0.046	1	ENSMUSG00000038451
Cox6b1	0.000302065	0.0732778	0.842	0.796	1	ENSMUSG00000036751
Zfp503	0.000302543	-0.0629875	0.161	0.214	1	ENSMUSG00000039081
Ankrd50	0.00030333	-0.072564	0.23	0.283	1	ENSMUSG00000044864
Lamtor2	0.000306698	0.0332023	0.302	0.221	1	ENSMUSG00000028062
Cxcl14	0.000307424	0.0442722	0.206	0.142	1	ENSMUSG00000021508
Psmb5	0.00030904	0.0757038	0.421	0.333	1	ENSMUSG00000022193
Card19	0.00030964	0.0268222	0.183	0.123	1	ENSMUSG00000037960
Ttbk2	0.000311581	-0.0498963	0.116	0.167	1	ENSMUSG00000090100
Fam110b	0.000313	0.0191708	0.061	0.029	1	ENSMUSG00000049119
Smox	0.000314492	0.0456131	0.172	0.116	1	ENSMUSG00000027333
Gm5850	0.000314875	-0.0163394	0.023	0.051	1	ENSMUSG00000103286
Gm5851	0.000314875	-0.0163394	0.023	0.051	1	ENSMUSG00000104028
Cfh	0.000316114	0.0250911	0.068	0.034	1	ENSMUSG00000026365
Rpl5-ps1	0.000317044	0.0172412	0.086	0.047	1	ENSMUSG00000082193
Gm5879	0.000317958	-0.0181389	0.036	0.07	1	ENSMUSG00000068262
Gsto1	0.000321077	0.0211956	0.109	0.064	1	ENSMUSG00000025068
Mydgf	0.000324902	0.0565133	0.514	0.4	1	ENSMUSG00000019579
Rps25-ps1	0.000325393	-0.0105489	0.134	0.195	1	ENSMUSG00000067344
Gm6565	0.000326529	-0.0123294	0.014	0.037	1	ENSMUSG00000079224
Gm6361	0.000326529	-0.0123294	0.014	0.037	1	ENSMUSG00000068964
Cks2	0.000329176	0.0795683	0.365	0.283	1	ENSMUSG00000062248
Vcpip1	0.000329278	-0.0741183	0.176	0.223	1	ENSMUSG00000045210
Smim6	0.000332296	0.0387876	0.109	0.066	1	ENSMUSG00000075420
Lsm7	0.000333265	0.0315157	0.325	0.241	1	ENSMUSG00000035215
Cmas	0.00033817	0.0447115	0.424	0.332	1	ENSMUSG00000030282
Hmgcl	0.000344965	0.0343296	0.11	0.066	1	ENSMUSG00000028672
Fbl	0.000348859	0.0447201	0.345	0.267	1	ENSMUSG00000046865
Gm11410	0.000350793	0.0124919	0.024	0.006	1	ENSMUSG00000083219
Phlda2	0.000352864	0.0147161	0.044	0.018	1	ENSMUSG00000010760
BC003331	0.00035287	-0.0769455	0.471	0.495	1	ENSMUSG00000006010
Rgma	0.000354301	-0.0896625	0.29	0.337	1	ENSMUSG00000070509
Gm12184	0.000357963	-0.0502562	0.167	0.226	1	ENSMUSG00000078154
Ak3	0.000358606	0.0337692	0.211	0.146	1	ENSMUSG00000024782
Uba6	0.000359346	-0.0573365	0.188	0.242	1	ENSMUSG00000035898
Ttc9c	0.00035982	-0.0793749	0.335	0.381	1	ENSMUSG00000071660
Cdc42ep4	0.000359994	0.0471878	0.279	0.204	1	ENSMUSG00000041598
S100a13	0.000360928	0.070898	0.703	0.631	1	ENSMUSG00000042312
Mterf3	0.000365437	-0.0568444	0.158	0.21	1	ENSMUSG00000021519
Dpcr1	0.000366276	-0.0855669	0.207	0.258	1	ENSMUSG00000073408
Ndufb7	0.000367825	0.055214	0.398	0.305	1	ENSMUSG00000033938
Ctse	0.000370613	-0.0185252	0.005	0.023	1	ENSMUSG00000004552
Mall	0.00037083	0.0492783	0.375	0.281	1	ENSMUSG00000027377
Bmf	0.000371848	0.0167187	0.029	0.009	1	ENSMUSG00000040093
Phb2	0.000371998	0.0521502	0.403	0.308	1	ENSMUSG00000004264
Wwp2	0.000372666	-0.0277678	0.892	0.884	1	ENSMUSG00000031930
Luc7l2	0.000373002	-0.0531772	0.811	0.821	1	ENSMUSG00000029823
Iqcc	0.000374728	-0.0266886	0.03	0.06	1	ENSMUSG00000040795
Snx4	0.000376512	0.0372455	0.439	0.337	1	ENSMUSG00000022808
Mms22l	0.000379514	0.0306709	0.074	0.039	1	ENSMUSG00000045751
Mecr	0.000381332	0.0127578	0.075	0.039	1	ENSMUSG00000028910
Lpl	0.00038192	0.0364221	0.112	0.068	1	ENSMUSG00000015568
Clta	0.000383415	0.0918197	0.621	0.522	1	ENSMUSG00000028478
Col9a3	0.000384906	0.0887685	0.983	0.977	1	ENSMUSG00000027570
Thoc7	0.000385197	-0.0608895	0.674	0.677	1	ENSMUSG00000053453
Rarres2	0.000386297	0.0134893	0.015	0.002	1	ENSMUSG00000009281
Larp1b	0.000386842	0.0477189	0.225	0.161	1	ENSMUSG00000025762
Eef1g	0.000387467	0.0846847	0.818	0.777	1	ENSMUSG00000071644
Rcl1	0.00038773	0.0415615	0.206	0.142	1	ENSMUSG00000024785
Gstp2	0.000387773	0.0781864	0.727	0.676	1	ENSMUSG00000038155
AV039307	0.000390416	0.00780415	0.011	0	1	ENSMUSG00000087519
Pou2af1	0.000390416	0.00824122	0.011	0	1	ENSMUSG00000032053
Gm12092	0.000390416	0.00845745	0.011	0	1	ENSMUSG00000084850
AC149586.1	0.000390416	0.00670524	0.011	0	1	ENSMUSG00000113321
Sema4c	0.000392339	0.0438984	0.173	0.117	1	ENSMUSG00000026121
Slc2a3	0.000393828	0.010375	0.127	0.079	1	ENSMUSG00000003153
Papd5	0.000394334	-0.0642805	0.158	0.204	1	ENSMUSG00000036779
Nup93	0.000397229	0.0415247	0.113	0.067	1	ENSMUSG00000032939
Xylt1	0.000397936	-0.0284873	0.867	0.866	1	ENSMUSG00000030657
Rsrp1	0.000398889	-0.0237163	0.769	0.789	1	ENSMUSG00000037266
Gm4319	0.00040133	-0.00994546	0	0.011	1	ENSMUSG00000102123
Neu2	0.00040133	-0.0145042	0	0.011	1	ENSMUSG00000079434
Gpr39	0.00040133	-0.00987507	0	0.011	1	ENSMUSG00000026343
Gm38944	0.00040133	-0.00970665	0	0.011	1	ENSMUSG00000109080
52399	0.00040133	-0.0104743	0	0.011	1	NA
Lrwd1	0.000401909	0.0130181	0.041	0.016	1	ENSMUSG00000029703
Ubap2l	0.000401933	-0.0853602	0.479	0.505	1	ENSMUSG00000042520
Prcp	0.000403224	0.0289394	0.108	0.065	1	ENSMUSG00000061119
Zbtb1	0.000412096	-0.0693425	0.193	0.242	1	ENSMUSG00000033454
Tinagl1	0.000412627	0.0216321	0.032	0.01	1	ENSMUSG00000028776
Tnpo3	0.000412965	0.0507159	0.263	0.192	1	ENSMUSG00000012535
Trabd2b	0.000413008	-0.0901988	0.249	0.303	1	ENSMUSG00000070867
Gpaa1	0.000415302	0.048943	0.294	0.217	1	ENSMUSG00000022561
Emp3	0.000418249	0.0546125	0.533	0.441	1	ENSMUSG00000040212
Gorasp2	0.000419724	0.0825792	0.664	0.557	1	ENSMUSG00000014959
Ccdc50	0.000422218	-0.0868164	0.324	0.363	1	ENSMUSG00000038127
Fibin	0.00042266	0.0844719	0.631	0.525	1	ENSMUSG00000074971
Gm15531	0.000422984	0.0114249	0.021	0.004	1	ENSMUSG00000083086
Cdc5l	0.000432407	-0.077933	0.56	0.582	1	ENSMUSG00000023932
Sp7	0.000437765	-0.0605783	0.721	0.723	1	ENSMUSG00000060284
Med29	0.000438147	0.0238593	0.15	0.098	1	ENSMUSG00000003444
Rpl39-ps	0.000438176	0.0213004	0.057	0.027	1	ENSMUSG00000036305
Txndc5	0.000441008	0.0784997	0.716	0.621	1	ENSMUSG00000038991
Slain2	0.00044461	-0.0668837	0.293	0.342	1	ENSMUSG00000036087
Arl6ip4	0.000446574	0.0185794	0.248	0.174	1	ENSMUSG00000029404
Ndufa13	0.000446815	0.0480758	0.58	0.47	1	ENSMUSG00000036199
54257	0.000447063	0.0118325	0.027	0.008	1	NA
Gm4853	0.000455051	-0.0421998	0.098	0.145	1	ENSMUSG00000081473
Ndufaf8	0.00045768	0.0381298	0.266	0.193	1	ENSMUSG00000078572
Crip2	0.000458765	0.0538616	0.221	0.157	1	ENSMUSG00000006356
Phykpl	0.000459746	0.034666	0.239	0.17	1	ENSMUSG00000020359
Gm9385	0.000460583	-0.0280324	0.084	0.13	1	ENSMUSG00000080848
Rbm3	0.000462051	0.0702423	0.654	0.57	1	ENSMUSG00000031167
Aaas	0.000463786	0.0282537	0.104	0.062	1	ENSMUSG00000036678
Oprd1	0.000464049	-0.0391431	0.03	0.06	1	ENSMUSG00000050511
Gm15710	0.000465933	0.0262458	0.042	0.017	1	ENSMUSG00000084111
Bola2	0.000467841	0.0238664	0.23	0.161	1	ENSMUSG00000047721
Gm6206	0.000472916	-0.0277848	0.092	0.135	1	ENSMUSG00000048949
Cul7	0.000476544	0.0423467	0.294	0.216	1	ENSMUSG00000038545
Uqcrfs1	0.000478985	0.0547706	0.406	0.318	1	ENSMUSG00000038462
H1f0	0.000484368	0.112301	0.719	0.638	1	ENSMUSG00000096210
Rpl17-ps9	0.000488018	-0.0568865	0.24	0.309	1	ENSMUSG00000066543
Pnisr	0.000489565	-0.0570594	0.706	0.697	1	ENSMUSG00000028248
Gypc	0.000496443	0.018497	0.082	0.045	1	ENSMUSG00000090523
Chchd6	0.000498536	0.0340528	0.212	0.151	1	ENSMUSG00000030086
Bmp3	0.000499156	-0.0207361	0.007	0.026	1	ENSMUSG00000029335
Gm45251	0.000501656	0.0320567	0.149	0.097	1	ENSMUSG00000110120
Zcchc5	0.000503262	0.0765017	0.552	0.462	1	ENSMUSG00000047686
Rpl27	0.000506638	0.0671666	0.846	0.828	1	ENSMUSG00000063316
Gm7285	0.000508233	0.0334875	0.056	0.027	1	ENSMUSG00000105408
Srm	0.000509371	0.0484348	0.45	0.368	1	ENSMUSG00000006442
Rspo4	0.000511688	-0.089707	0.542	0.549	1	ENSMUSG00000032852
Gm6395	0.000511702	-0.0110106	0.022	0.048	1	ENSMUSG00000091905
Mrpl23-ps1	0.000518402	0.0476792	0.528	0.42	1	ENSMUSG00000075279
Golga5	0.000518534	0.0540327	0.369	0.279	1	ENSMUSG00000021192
Phospho1	0.000519864	0.0952286	0.315	0.253	1	ENSMUSG00000050860
Gm15198	0.000521983	0.0162003	0.03	0.009	1	ENSMUSG00000083429
Hist1h2an	0.000522525	-0.00765578	0.023	0.051	1	ENSMUSG00000069309
Arpc1b	0.000523842	0.0676401	0.888	0.854	1	ENSMUSG00000029622
Tmem263	0.000524078	-0.0528474	0.734	0.728	1	ENSMUSG00000060935
Col8a1	0.000526367	0.00643638	0.025	0.007	1	ENSMUSG00000068196
Wapl	0.000529412	-0.08067	0.387	0.431	1	ENSMUSG00000041408
Rpl29	0.000529831	0.0612778	0.904	0.909	1	ENSMUSG00000048758
Lcorl	0.000534436	-0.0794604	0.18	0.226	1	ENSMUSG00000015882
Xiap	0.000540149	-0.0659359	0.45	0.483	1	ENSMUSG00000025860
Rpl31-ps10	0.000551411	0.026556	0.069	0.037	1	ENSMUSG00000070667
Ap3s1-ps2	0.000555919	-0.0139218	0.019	0.044	1	ENSMUSG00000094257
Itm2a	0.00055652	0.0776353	0.755	0.697	1	ENSMUSG00000031239
Ak2	0.000559364	0.0467516	0.509	0.406	1	ENSMUSG00000028792
Mmp25	0.000561515	0.0130411	0.023	0.006	1	ENSMUSG00000023903
2410015M20Rik	0.000565119	0.0609807	0.338	0.257	1	ENSMUSG00000049760
Mier1	0.000566089	-0.0782899	0.456	0.487	1	ENSMUSG00000028522
Qk	0.000566684	-0.0524099	0.721	0.721	1	ENSMUSG00000062078
CU074400.1	0.00056798	0.00575305	0.013	0.001	1	ENSMUSG00000114254
Atp6v0b	0.000568673	0.0475237	0.421	0.322	1	ENSMUSG00000033379
AW549877	0.000568951	-0.0726662	0.253	0.293	1	ENSMUSG00000041935
Mt2	0.000574008	-0.13777	0.11	0.156	1	ENSMUSG00000031762
Mvk	0.000578982	0.0276762	0.121	0.075	1	ENSMUSG00000041939
Lix1l	0.000579487	0.0678075	0.462	0.369	1	ENSMUSG00000049288
Smc6	0.00058108	-0.0796826	0.548	0.564	1	ENSMUSG00000020608
Gm14327	0.000586398	-0.00584085	0.163	0.109	1	ENSMUSG00000074521
Prelid2	0.000586531	0.0151005	0.056	0.027	1	ENSMUSG00000056671
Tmem256	0.000586732	0.0361942	0.376	0.287	1	ENSMUSG00000070394
Foxo3	0.000587122	-0.0592023	0.228	0.272	1	ENSMUSG00000048756
Nfkbia	0.000595272	0.0583387	0.536	0.449	1	ENSMUSG00000021025
Cs	0.000595305	0.0461334	0.377	0.291	1	ENSMUSG00000005683
Hbs1l	0.000595448	0.0672277	0.384	0.296	1	ENSMUSG00000019977
Rpl3-ps2	0.000597771	-0.0212053	0.087	0.134	1	ENSMUSG00000084131
Gnb2	0.000599162	0.0486347	0.54	0.433	1	ENSMUSG00000029713
Ctdsp2	0.000600071	0.0618222	0.693	0.626	1	ENSMUSG00000078429
Gm6266	0.000603031	0.0219384	0.073	0.04	1	ENSMUSG00000107788
A430005L14Rik	0.000611859	0.0255031	0.108	0.066	1	ENSMUSG00000047613
Rps12-ps22	0.000615054	0.00936209	0.063	0.032	1	ENSMUSG00000095277
Mrps28	0.000619097	0.070766	0.499	0.407	1	ENSMUSG00000040269
Gm9701	0.000620019	0.0165805	0.06	0.03	1	ENSMUSG00000063001
Col15a1	0.000621044	0.0756528	0.338	0.263	1	ENSMUSG00000028339
Rpl36a-ps2	0.000621285	-0.0560492	0.309	0.384	1	ENSMUSG00000105388
Gm13436	0.000621849	-0.0302379	0.124	0.178	1	ENSMUSG00000083716
Plrg1	0.000622063	0.0265718	0.262	0.188	1	ENSMUSG00000027998
Nip7	0.000632023	0.0430847	0.269	0.2	1	ENSMUSG00000031917
Mrps34	0.0006338	0.0437568	0.324	0.252	1	ENSMUSG00000038880
Gm29257	0.000636622	0.0173865	0.103	0.061	1	ENSMUSG00000100228
Cacybp	0.000636904	-0.0934749	0.51	0.524	1	ENSMUSG00000014226
Tomm40	0.000638468	0.0420135	0.27	0.199	1	ENSMUSG00000002984
Sec16b	0.000638886	0.0175504	0.278	0.2	1	ENSMUSG00000026589
Asns	0.000646871	0.031362	0.169	0.115	1	ENSMUSG00000029752
Pax1	0.000653473	-0.0959427	0.212	0.264	1	ENSMUSG00000037034
Gnpda2	0.000654919	0.0252314	0.131	0.085	1	ENSMUSG00000029209
Mdh1	0.000655727	0.0595847	0.729	0.654	1	ENSMUSG00000020321
Cbx3-ps7	0.000656148	-0.0214941	0.012	0.033	1	ENSMUSG00000059647
mt-Atp6	0.000661755	0.0231328	0.996	0.997	1	ENSMUSG00000064357
Atp5f1	0.000663657	0.0576718	0.701	0.619	1	ENSMUSG00000000563
Gm5641	0.000669784	-0.061101	0.175	0.233	1	ENSMUSG00000069014
Phf11d	0.000669982	0.00754531	0.02	0.004	1	ENSMUSG00000068245
Sorbs2	0.000670376	-0.0734078	0.149	0.196	1	ENSMUSG00000031626
Plac8	0.000674868	-0.0162654	0	0.01	1	ENSMUSG00000029322
Gm4425	0.000674868	-0.00965163	0	0.01	1	ENSMUSG00000093846
Pebp4	0.000674868	-0.00699145	0	0.01	1	ENSMUSG00000022085
Aqp2	0.000674868	-0.0106084	0	0.01	1	ENSMUSG00000023013
Galnt14	0.000674868	-0.0052175	0	0.01	1	ENSMUSG00000024064
Frmd7	0.000674868	-0.0087007	0	0.01	1	ENSMUSG00000036131
Kat6a	0.000676897	-0.0771838	0.397	0.426	1	ENSMUSG00000031540
Mrpl54	0.000677604	0.0253074	0.356	0.269	1	ENSMUSG00000034932
Rpl27a-ps1	0.000678136	0.00952808	0.031	0.01	1	ENSMUSG00000061488
Timm8b	0.000681183	0.0419686	0.362	0.276	1	ENSMUSG00000039016
AC160403.2	0.00068491	0.000428902	0.047	0.021	1	ENSMUSG00000111847
Unc80	0.000686979	0.00774087	0.01	0	1	ENSMUSG00000055567
Kif12	0.000686979	0.00596556	0.01	0	1	ENSMUSG00000028357
Chd5	0.000686979	0.00663345	0.01	0	1	ENSMUSG00000005045
Gm45231	0.000686979	0.00742165	0.01	0	1	ENSMUSG00000108888
Mal2	0.000686979	0.00671928	0.01	0	1	ENSMUSG00000024479
Psmb2	0.000687394	0.0618921	0.645	0.557	1	ENSMUSG00000028837
Gm14410	0.000689823	-0.019036	0.104	0.149	1	ENSMUSG00000078870
Sdhd	0.000690084	0.0628879	0.57	0.471	1	ENSMUSG00000000171
Gm11450	0.000691377	0.00902316	0.016	0.003	1	ENSMUSG00000082296
Rgs3	0.00069352	0.0535222	0.28	0.212	1	ENSMUSG00000059810
Apold1	0.000699927	0.0222914	0.031	0.01	1	ENSMUSG00000090698
Scaf11	0.000701495	-0.05613	0.603	0.599	1	ENSMUSG00000033228
Fmc1	0.00070772	0.0142508	0.214	0.15	1	ENSMUSG00000019689
2510009E07Rik	0.000708565	-0.0677938	0.263	0.305	1	ENSMUSG00000043391
Mb21d2	0.000710205	0.0343237	0.078	0.044	1	ENSMUSG00000051065
Rpl35a-ps7	0.000711447	0.0109461	0.018	0.003	1	ENSMUSG00000094557
Peg13	0.000714274	-0.0435768	0.073	0.112	1	ENSMUSG00000106847
Gm42778	0.000718174	0.00903629	0.016	0.003	1	ENSMUSG00000105112
Setx	0.000718644	-0.0698404	0.231	0.277	1	ENSMUSG00000043535
Vdac3-ps1	0.000721936	-0.0184786	0.025	0.053	1	ENSMUSG00000075053
Csf2ra	0.000724264	-0.039198	0.057	0.093	1	ENSMUSG00000059326
Dcps	0.000726958	0.0342814	0.102	0.061	1	ENSMUSG00000032040
Rps20	0.000728151	0.0459567	0.964	0.968	1	ENSMUSG00000028234
Nomo1	0.000728856	0.0709433	0.442	0.356	1	ENSMUSG00000030835
5930430L01Rik	0.000733624	0.0292478	0.082	0.047	1	ENSMUSG00000106951
Parp3	0.000739263	0.0179709	0.15	0.099	1	ENSMUSG00000023249
Gm10184	0.000741697	0.0108933	0.149	0.098	1	ENSMUSG00000066878
Ap1s2	0.000747544	0.00713906	0.145	0.096	1	ENSMUSG00000031367
Kifc3	0.00075096	0.0155677	0.077	0.042	1	ENSMUSG00000031788
Ppia	0.00075244	0.045657	0.954	0.968	1	ENSMUSG00000071866
Gm9294	0.000754531	0.0313256	0.071	0.039	1	ENSMUSG00000044609
Mrps15	0.000766714	0.04036	0.23	0.165	1	ENSMUSG00000028861
M1ap	0.000770697	0.0397881	0.257	0.195	1	ENSMUSG00000030041
Ndufs5	0.000771609	0.0529068	0.739	0.648	1	ENSMUSG00000028648
Svep1	0.000774857	0.0279776	0.067	0.035	1	ENSMUSG00000028369
Hmgn5	0.000776482	0.0629315	0.321	0.252	1	ENSMUSG00000031245
Cdc123	0.000780297	-0.0779564	0.51	0.525	1	ENSMUSG00000039128
Pim1	0.000794091	0.0736427	0.231	0.173	1	ENSMUSG00000024014
Romo1	0.000794224	0.0239116	0.322	0.243	1	ENSMUSG00000067847
Mdn1	0.00079428	-0.0738879	0.168	0.215	1	ENSMUSG00000058006
Cdc42ep3	0.000796998	-0.0766561	0.783	0.789	1	ENSMUSG00000036533
Mycbp2	0.000808715	-0.0800722	0.37	0.405	1	ENSMUSG00000033004
Coasy	0.000812228	0.0273483	0.129	0.083	1	ENSMUSG00000001755
Dennd1b	0.000812746	-0.0577835	0.167	0.213	1	ENSMUSG00000056268
Col9a1	0.000818661	0.0925753	0.991	0.981	1	ENSMUSG00000026147
Mcur1	0.000820249	0.0487443	0.251	0.184	1	ENSMUSG00000021371
Zfp967	0.000820861	0.000592204	0.138	0.09	1	ENSMUSG00000095199
Smap1	0.000822592	0.0654929	0.468	0.362	1	ENSMUSG00000026155
Abhd2	0.00082522	-0.0777847	0.427	0.462	1	ENSMUSG00000039202
Frmd8	0.000825912	0.0542097	0.33	0.252	1	ENSMUSG00000024816
Rps26-ps1	0.000828426	0.0448717	0.162	0.11	1	ENSMUSG00000059775
Fosb	0.000829172	0.114861	0.878	0.84	1	ENSMUSG00000003545
Abca5	0.000829185	-0.0561686	0.167	0.214	1	ENSMUSG00000018800
Nipsnap3b	0.000829342	0.0270765	0.181	0.124	1	ENSMUSG00000015247
Fam217b	0.000829957	-0.032878	0.039	0.07	1	ENSMUSG00000070476
Ahnak2	0.000834244	0.0174497	0.032	0.011	1	ENSMUSG00000072812
Ly6e	0.000839375	-0.10383	0.12	0.162	1	ENSMUSG00000022587
Map3k1	0.000840376	0.0355858	0.149	0.101	1	ENSMUSG00000021754
Caprin1	0.000841534	-0.0436106	0.564	0.592	1	ENSMUSG00000027184
Snf8	0.000849179	0.0535785	0.423	0.346	1	ENSMUSG00000006058
Eif3e	0.000852308	-0.0665789	0.713	0.734	1	ENSMUSG00000022336
Nup153	0.00085277	-0.0514931	0.167	0.216	1	ENSMUSG00000021374
AC124421.1	0.000854165	0.043477	0.231	0.172	1	ENSMUSG00000112255
Zfp593	0.000859796	0.0392116	0.115	0.072	1	ENSMUSG00000028840
Hsdl2	0.000865432	0.0278857	0.217	0.154	1	ENSMUSG00000028383
Me1	0.000866587	0.0730245	0.617	0.538	1	ENSMUSG00000032418
Hist1h2aj	0.000868515	-0.00578413	0.024	0.051	1	ENSMUSG00000080076
Nsmaf	0.000869431	0.0262798	0.095	0.057	1	ENSMUSG00000028245
Dusp28	0.000874722	0.0355038	0.185	0.13	1	ENSMUSG00000047067
Son	0.000874733	-0.0305529	0.815	0.813	1	ENSMUSG00000022961
Ppib	0.000875897	-0.0550437	0.732	0.754	1	ENSMUSG00000032383
Ptpra	0.000879544	-0.078025	0.478	0.494	1	ENSMUSG00000027303
Smc4	0.000886341	-0.0723136	0.724	0.726	1	ENSMUSG00000034349
Trmt61b	0.000886391	0.018699	0.095	0.057	1	ENSMUSG00000085492
Zbtb22	0.000894338	0.0149379	0.102	0.061	1	ENSMUSG00000051390
Lgmn	0.000895142	0.0578552	0.429	0.35	1	ENSMUSG00000021190
Aplp2	0.000896141	-0.0583979	0.689	0.678	1	ENSMUSG00000031996
Tdg	0.000897764	0.0291201	0.324	0.247	1	ENSMUSG00000034674
Ppic	0.000902445	-0.0138118	0.95	0.953	1	ENSMUSG00000024538
Usp50	0.000907456	0.0348413	0.419	0.339	1	ENSMUSG00000027364
Skp1a	0.000912919	-0.0298961	0.81	0.803	1	ENSMUSG00000036309
Ythdf1	0.000912992	-0.0714463	0.427	0.462	1	ENSMUSG00000038848
Lmna	0.000914306	0.0378576	0.412	0.325	1	ENSMUSG00000028063
Tmem160	0.000916996	0.0350942	0.232	0.167	1	ENSMUSG00000019158
Tgoln1	0.000917447	-0.0206643	0.719	0.713	1	ENSMUSG00000056429
1700030C10Rik	0.000919378	-0.0121778	0.004	0.018	1	ENSMUSG00000091071
Dynlt1a	0.000920448	0.0150757	0.434	0.35	1	ENSMUSG00000092074
Psmb6	0.000923949	0.0386602	0.452	0.352	1	ENSMUSG00000018286
Nsd3	0.000926803	-0.0972873	0.386	0.407	1	ENSMUSG00000054823
Secisbp2l	0.000932042	-0.0604413	0.266	0.313	1	ENSMUSG00000035093
Fam96a	0.000936577	0.0184935	0.266	0.196	1	ENSMUSG00000032381
Samm50	0.000940468	0.0329414	0.22	0.156	1	ENSMUSG00000022437
Arf5	0.00094439	0.0596695	0.646	0.544	1	ENSMUSG00000020440
Emc6	0.000948099	0.0587614	0.417	0.326	1	ENSMUSG00000047260
Daxx	0.000949093	0.0267452	0.211	0.149	1	ENSMUSG00000002307
Banp	0.000950421	-0.0512461	0.089	0.129	1	ENSMUSG00000025316
Hcfc1r1	0.00095217	0.0643873	0.517	0.431	1	ENSMUSG00000023904
Gm11604	0.000958806	0.0116065	0.043	0.019	1	ENSMUSG00000085897
Mrpl23	0.000962099	0.0447269	0.537	0.431	1	ENSMUSG00000037772
Ep300	0.000974021	-0.0683932	0.409	0.442	1	ENSMUSG00000055024
Nfkbiz	0.000978177	0.087246	0.515	0.42	1	ENSMUSG00000035356
Wdr89	0.000979798	0.0778088	0.35	0.274	1	ENSMUSG00000045690
1110059E24Rik	0.000981832	0.0285996	0.162	0.11	1	ENSMUSG00000035171
Vit	0.000987118	-0.0654251	0.743	0.762	1	ENSMUSG00000024076
Id1	0.00098718	-0.108366	0.517	0.543	1	ENSMUSG00000042745
Atox1	0.00099312	0.0427143	0.436	0.343	1	ENSMUSG00000018585
Psmd9	0.000994542	0.0306733	0.165	0.113	1	ENSMUSG00000029440
Cisd2	0.00100015	-0.044488	0.644	0.648	1	ENSMUSG00000028165
Actn1	0.00100435	-0.0605946	0.596	0.605	1	ENSMUSG00000015143
Ogt	0.00100675	-0.064608	0.357	0.399	1	ENSMUSG00000034160
Tspan13	0.00100737	-0.0755261	0.62	0.657	1	ENSMUSG00000020577
Dda1	0.00100873	0.0470336	0.391	0.305	1	ENSMUSG00000074247
Rps12-ps11	0.00100914	0.0192625	0.074	0.041	1	ENSMUSG00000094238
Sparc	0.00100955	0.0159911	0.999	1	1	ENSMUSG00000018593
Frzb	0.00101347	0.10856	0.286	0.223	1	ENSMUSG00000027004
Gm10263	0.0010178	0.024618	0.082	0.047	1	ENSMUSG00000066407
BC051077	0.0010211	0.0778155	0.377	0.31	1	ENSMUSG00000097163
Epha4	0.00102255	-0.0610533	0.111	0.153	1	ENSMUSG00000026235
Atp1a1	0.00102355	0.0584519	0.654	0.56	1	ENSMUSG00000033161
Golph3	0.00103039	-0.052402	0.738	0.745	1	ENSMUSG00000022200
Pdk4	0.00103546	0.0312579	0.044	0.02	1	ENSMUSG00000019577
Vps26a	0.00103831	-0.0506439	0.137	0.179	1	ENSMUSG00000020078
Snrpe	0.00103948	0.0748535	0.736	0.651	1	ENSMUSG00000090553
Ndufb2	0.00104479	0.0389945	0.426	0.339	1	ENSMUSG00000002416
Pcdh9	0.00104738	-0.0357694	0.047	0.079	1	ENSMUSG00000055421
Cdc73	0.0010479	-0.0610642	0.486	0.499	1	ENSMUSG00000026361
Tdg-ps	0.00106397	0.0202021	0.163	0.112	1	ENSMUSG00000047347
Zhx1	0.00107293	-0.071454	0.236	0.28	1	ENSMUSG00000022361
Gpx1	0.00107294	0.0799868	0.553	0.455	1	ENSMUSG00000063856
Cers2	0.00107514	-0.0727026	0.594	0.596	1	ENSMUSG00000015714
Golga2	0.00107724	0.0512166	0.419	0.331	1	ENSMUSG00000002546
Gm13215	0.00107836	0.0162245	0.038	0.016	1	ENSMUSG00000081394
Tcf7l1	0.00108266	0.0549313	0.253	0.189	1	ENSMUSG00000055799
Selenoh	0.00108287	0.0206346	0.295	0.22	1	ENSMUSG00000076437
Rcor2	0.00109278	0.0190683	0.227	0.166	1	ENSMUSG00000024968
Tmem238	0.00109316	0.0371634	0.17	0.118	1	ENSMUSG00000030431
Rc3h2	0.00110273	-0.0654118	0.212	0.257	1	ENSMUSG00000075376
Gng2	0.00110273	0.0105069	0.095	0.056	1	ENSMUSG00000043004
Rftn2	0.00110857	-0.0758153	0.669	0.687	1	ENSMUSG00000025978
Ywhae	0.00111574	-0.0361394	0.922	0.943	1	ENSMUSG00000020849
Chrac1	0.00111667	0.025485	0.209	0.15	1	ENSMUSG00000068391
Platr25	0.00111813	-0.0241245	0.024	0.05	1	ENSMUSG00000074863
Haus1	0.00112161	0.0412706	0.109	0.069	1	ENSMUSG00000041840
AI506816	0.0011265	-0.039595	0.801	0.808	1	ENSMUSG00000105987
Taf1	0.00113347	-0.0673354	0.199	0.242	1	ENSMUSG00000031314
Rnf32	0.00113744	-0.00853567	0	0.009	1	ENSMUSG00000029130
4931415C17Rik	0.00113744	-0.00784133	0	0.009	1	ENSMUSG00000054910
Spock3	0.00113744	-0.00875806	0	0.009	1	ENSMUSG00000054162
Tmem59l	0.00113744	-0.0105851	0	0.009	1	ENSMUSG00000035964
Gm14705	0.00113744	-0.00712092	0	0.009	1	ENSMUSG00000086676
Nudt4	0.00113863	-0.0512443	0.424	0.457	1	ENSMUSG00000020029
Sbds	0.00113869	-0.0677792	0.329	0.364	1	ENSMUSG00000025337
Abca9	0.00114275	-0.0307214	0.03	0.057	1	ENSMUSG00000041797
Gt(ROSA)26Sor	0.00114502	0.0478189	0.199	0.143	1	ENSMUSG00000086429
Zfp62	0.00114575	-0.0718877	0.145	0.186	1	ENSMUSG00000046311
Gm4366	0.00115447	-0.0380649	0.233	0.294	1	ENSMUSG00000107383
Wtip	0.00115941	0.0395658	0.27	0.2	1	ENSMUSG00000036459
Kpnb1	0.00116102	-0.0702048	0.576	0.582	1	ENSMUSG00000001440
Eif4a1	0.00117339	0.0675563	0.844	0.804	1	ENSMUSG00000059796
Sgcb	0.00117725	0.0281044	0.194	0.138	1	ENSMUSG00000029156
Psmd1	0.00118285	0.0615001	0.516	0.425	1	ENSMUSG00000026229
Phc3	0.00118301	-0.0595874	0.218	0.261	1	ENSMUSG00000037652
Idh1	0.00118425	0.060905	0.481	0.39	1	ENSMUSG00000025950
Gm9457	0.00118731	0.0115474	0.028	0.009	1	ENSMUSG00000095600
Rps29	0.00119126	-0.0338631	0.961	0.982	1	ENSMUSG00000034892
Dlk2	0.00120708	0.012909	0.041	0.018	1	ENSMUSG00000047428
Fbxo25	0.00121052	0.0239294	0.165	0.112	1	ENSMUSG00000038365
Pantr1	0.00121216	0.00867121	0.009	0	1	ENSMUSG00000060424
Erv3	0.00121216	0.00785931	0.009	0	1	ENSMUSG00000037482
Erich6	0.00121216	0.00789203	0.009	0	1	ENSMUSG00000070471
Il17re	0.00121216	0.00635332	0.009	0	1	ENSMUSG00000043088
1700104B16Rik	0.00121216	0.0071026	0.009	0	1	ENSMUSG00000049476
AC145731.1	0.00121216	0.00648699	0.009	0	1	ENSMUSG00000111094
Alox12b	0.00121216	0.00644339	0.009	0	1	ENSMUSG00000032807
1700086L19Rik	0.00121216	0.00703716	0.009	0	1	ENSMUSG00000071265
Pde8b	0.00121216	0.00643386	0.009	0	1	ENSMUSG00000021684
Sh3rf2	0.00121216	0.0101261	0.009	0	1	ENSMUSG00000057719
Cldn2	0.00121216	0.00798699	0.009	0	1	ENSMUSG00000047230
Rit1	0.00121803	0.0313541	0.17	0.117	1	ENSMUSG00000028057
Gm4462	0.00121934	-0.0176156	0.015	0.037	1	ENSMUSG00000090319
Pak4	0.00122184	0.0326615	0.207	0.149	1	ENSMUSG00000030602
Nans	0.00123206	0.0396743	0.464	0.374	1	ENSMUSG00000028334
Sh2b2	0.00123318	-0.0646576	0.169	0.211	1	ENSMUSG00000005057
Ehbp1l1	0.00124028	0.0650405	0.207	0.151	1	ENSMUSG00000024937
Ehd4	0.00124608	0.0510511	0.164	0.115	1	ENSMUSG00000027293
Acadsb	0.00124802	-0.0763258	0.327	0.362	1	ENSMUSG00000030861
Rps12-ps6	0.0012519	0.018678	0.072	0.041	1	ENSMUSG00000096831
Cog3	0.00125296	0.0195593	0.235	0.17	1	ENSMUSG00000034893
Cnppd1	0.00126007	0.0408965	0.193	0.135	1	ENSMUSG00000033159
Kcna5	0.00126024	0.0108307	0.023	0.007	1	ENSMUSG00000045534
Ice2	0.00126495	-0.040599	0.076	0.113	1	ENSMUSG00000032235
B4galt2	0.00126692	0.0260862	0.169	0.118	1	ENSMUSG00000028541
Sox12	0.00126962	-0.0622839	0.14	0.183	1	ENSMUSG00000051817
Rbm48	0.00127998	-0.0578316	0.076	0.112	1	ENSMUSG00000040302
Rufy3	0.00128108	-0.0667046	0.131	0.172	1	ENSMUSG00000029291
2005-03-01	0.00128194	0.0166241	0.293	0.211	1	ENSMUSG00000023307
Atpaf1	0.00129847	0.0233746	0.098	0.06	1	ENSMUSG00000028710
Pde3b	0.00130369	-0.0782944	0.268	0.311	1	ENSMUSG00000030671
Atp5a1	0.00131524	0.0864235	0.889	0.856	1	ENSMUSG00000025428
Ly6c1	0.00131824	-0.074141	0.082	0.12	1	ENSMUSG00000079018
Irx5	0.00132105	0.0603465	0.129	0.087	1	ENSMUSG00000031737
Golt1b	0.00132107	0.0289619	0.237	0.169	1	ENSMUSG00000030245
Taf5	0.00132423	0.016315	0.095	0.059	1	ENSMUSG00000025049
Thyn1	0.00133022	0.0222071	0.177	0.122	1	ENSMUSG00000035443
St13	0.00133158	-0.0854997	0.699	0.712	1	ENSMUSG00000022403
Cwf19l2	0.00133441	0.026355	0.228	0.167	1	ENSMUSG00000025898
Rpl9-ps4	0.00136411	-0.0201033	0.347	0.423	1	ENSMUSG00000094989
Dok1	0.00136831	0.0488058	0.296	0.224	1	ENSMUSG00000068335
Arhgef37	0.00136831	0.0112274	0.026	0.009	1	ENSMUSG00000045094
Ccdc34	0.00137733	0.0674471	0.448	0.366	1	ENSMUSG00000027160
Bicc1	0.00139037	0.0216342	0.118	0.076	1	ENSMUSG00000014329
Rn7s1	0.00139049	0.0105808	0.04	0.017	1	ENSMUSG00000099021
Lims2	0.00139235	0.0396683	0.231	0.17	1	ENSMUSG00000024395
Gramd2	0.0014005	0.0623182	0.571	0.472	1	ENSMUSG00000074259
Gm15050	0.00140341	0.0186753	0.106	0.066	1	ENSMUSG00000087626
Elf1	0.00140759	-0.0604728	0.296	0.342	1	ENSMUSG00000036461
Sacm1l	0.00141574	-0.0645151	0.21	0.25	1	ENSMUSG00000025240
Picalm	0.00141855	-0.0975063	0.641	0.638	1	ENSMUSG00000039361
Nrep	0.00141966	-0.0389606	0.919	0.923	1	ENSMUSG00000042834
Laptm4b	0.00142389	0.00969834	0.276	0.204	1	ENSMUSG00000022257
Zfp37	0.00142973	-0.0399026	0.069	0.105	1	ENSMUSG00000028389
Gm15013	0.00143483	0.00810099	0.022	0.006	1	ENSMUSG00000098559
Gm5453	0.00143793	0.0286556	0.034	0.014	1	ENSMUSG00000062461
Agt	0.00144112	0.0308196	0.104	0.066	1	ENSMUSG00000031980
Kcnma1	0.00144596	-0.0671732	0.565	0.589	1	ENSMUSG00000063142
Znhit6	0.00144789	-0.0774802	0.382	0.422	1	ENSMUSG00000074182
Cbx4	0.00145346	-0.0993983	0.336	0.368	1	ENSMUSG00000039989
Capn1	0.00145809	-0.0658671	0.133	0.175	1	ENSMUSG00000024942
Cct3	0.00146181	0.0495578	0.464	0.373	1	ENSMUSG00000001416
Tdp2	0.00146323	-0.0682858	0.158	0.202	1	ENSMUSG00000035958
Glrx3	0.00146597	0.0738074	0.587	0.513	1	ENSMUSG00000031068
Hist1h2ai	0.0014668	-0.00588595	0.028	0.054	1	ENSMUSG00000071516
Hist1h2ah	0.0014668	-0.00588595	0.028	0.054	1	ENSMUSG00000069302
Polr1c	0.00146933	0.0488245	0.443	0.36	1	ENSMUSG00000067148
Rep15	0.00147082	0.0283815	0.252	0.187	1	ENSMUSG00000040121
Med9	0.00147745	0.0438588	0.239	0.175	1	ENSMUSG00000061650
Gm10260	0.00148482	-0.0541537	0.093	0.135	1	ENSMUSG00000069117
Cdk12	0.00148948	-0.067683	0.248	0.287	1	ENSMUSG00000003119
Fxyd3	0.00149511	0.113713	0.548	0.481	1	ENSMUSG00000057092
Selenok	0.00149579	0.0610926	0.782	0.7	1	ENSMUSG00000042682
Pnpo	0.00150994	0.0134411	0.071	0.04	1	ENSMUSG00000018659
Gm6177	0.00151487	0.00990979	0.04	0.017	1	ENSMUSG00000057499
Snhg8	0.00151711	0.0762397	0.596	0.513	1	ENSMUSG00000104960
Ccndbp1	0.00151822	0.0398318	0.243	0.18	1	ENSMUSG00000023572
Sh3d19	0.00152186	-0.0699834	0.398	0.432	1	ENSMUSG00000028082
E130102H24Rik	0.00152209	0.0138527	0.077	0.044	1	ENSMUSG00000086782
Intu	0.00152341	-0.0275727	0.064	0.098	1	ENSMUSG00000060798
Acbd5	0.00152759	-0.0734108	0.326	0.355	1	ENSMUSG00000026781
Hspg2	0.00153053	0.105078	0.817	0.764	1	ENSMUSG00000028763
Pcmtd2	0.00153454	-0.0397231	0.329	0.374	1	ENSMUSG00000027589
Spcs2	0.00156141	0.0771602	0.708	0.616	1	ENSMUSG00000035227
Nasp	0.00157407	-0.0727467	0.231	0.274	1	ENSMUSG00000028693
Serf1	0.00157709	0.0407591	0.533	0.437	1	ENSMUSG00000021643
Zmpste24	0.00157848	-0.0629463	0.473	0.488	1	ENSMUSG00000043207
Tfrc	0.00158015	0.0437537	0.321	0.25	1	ENSMUSG00000022797
Gm13232	0.00158463	-0.0116004	0.048	0.08	1	ENSMUSG00000084279
Srp9	0.00158824	0.0723507	0.688	0.605	1	ENSMUSG00000026511
N4bp2l2	0.00159196	-0.0759855	0.419	0.444	1	ENSMUSG00000029655
Trappc1	0.00159891	0.0435174	0.399	0.32	1	ENSMUSG00000049299
Trp53i13	0.00160033	0.0342205	0.163	0.113	1	ENSMUSG00000044328
Ggact	0.00160254	0.0472987	0.263	0.194	1	ENSMUSG00000041625
Tulp4	0.00160541	-0.0662936	0.332	0.372	1	ENSMUSG00000034377
Chdh	0.00161048	-0.0379227	0.095	0.134	1	ENSMUSG00000015970
Usp4	0.0016128	0.0336539	0.237	0.173	1	ENSMUSG00000032612
Pcsk9	0.00161811	0.017977	0.041	0.018	1	ENSMUSG00000044254
Mfsd14b	0.00161867	0.0358423	0.293	0.223	1	ENSMUSG00000038212
Med10	0.0016205	0.044811	0.212	0.154	1	ENSMUSG00000021598
Hbb-bs	0.00162441	-0.00710393	0.016	0.038	1	ENSMUSG00000052305
Mlh3	0.00162489	-0.0461389	0.1	0.141	1	ENSMUSG00000021245
Klhl12	0.00163515	0.0284259	0.076	0.044	1	ENSMUSG00000026455
Wnk4	0.00164288	0.0464214	0.134	0.091	1	ENSMUSG00000035112
Gemin7	0.00164956	0.0445475	0.301	0.228	1	ENSMUSG00000044709
Dhx32	0.00166782	0.0224617	0.129	0.085	1	ENSMUSG00000030986
Tnfrsf13c	0.00167009	0.0191718	0.041	0.018	1	ENSMUSG00000068105
Gjb6	0.00167341	-0.0802862	0.174	0.216	1	ENSMUSG00000040055
Pla2g12a	0.00167411	0.025196	0.13	0.086	1	ENSMUSG00000027999
Arhgap10	0.00167686	0.0242689	0.131	0.088	1	ENSMUSG00000037148
Lcp1	0.00167739	0.0236719	0.115	0.075	1	ENSMUSG00000021998
Pak2	0.00168792	-0.0621654	0.531	0.53	1	ENSMUSG00000022781
Usp37	0.00169147	-0.0508118	0.146	0.191	1	ENSMUSG00000033364
Gm8893	0.00169954	-0.0891048	0.17	0.219	1	ENSMUSG00000090555
52816	0.00170035	-0.0440199	0.418	0.495	1	NA
Gprasp2	0.0017121	-0.037931	0.059	0.093	1	ENSMUSG00000072966
Sumf2	0.00171236	0.0295138	0.176	0.123	1	ENSMUSG00000025538
Ssr4	0.00171964	0.0586406	0.827	0.798	1	ENSMUSG00000002014
Rtca	0.0017296	0.0351332	0.201	0.145	1	ENSMUSG00000000339
Shank3	0.00173064	-0.0350088	0.045	0.076	1	ENSMUSG00000022623
Sem1	0.00173298	0.0521034	0.841	0.822	1	ENSMUSG00000042541
Zfp994	0.00174007	-0.0424171	0.076	0.112	1	ENSMUSG00000096433
Ppp4r3b	0.00174173	-0.0521309	0.499	0.519	1	ENSMUSG00000020463
Grrp1	0.0017428	0.0127873	0.038	0.016	1	ENSMUSG00000050105
Ttc3	0.00174498	-0.0671537	0.654	0.661	1	ENSMUSG00000040785
Pphln1	0.00174627	-0.0653932	0.239	0.282	1	ENSMUSG00000036167
Uba5	0.00176114	0.0720362	0.512	0.428	1	ENSMUSG00000032557
Csrp1	0.00176149	0.0446349	0.177	0.128	1	ENSMUSG00000026421
Hyi	0.00176709	0.0395885	0.179	0.128	1	ENSMUSG00000006395
Ppp1r15a	0.00176885	0.0588845	0.599	0.496	1	ENSMUSG00000040435
Kpna2	0.00177134	0.00748699	0.152	0.104	1	ENSMUSG00000018362
Arap1	0.00177184	0.0709378	0.464	0.383	1	ENSMUSG00000032812
Zdhhc9	0.00177616	0.0287554	0.183	0.129	1	ENSMUSG00000036985
Mgarp	0.00177871	0.0111781	0.041	0.018	1	ENSMUSG00000037161
Gar1	0.00178357	0.0280268	0.289	0.218	1	ENSMUSG00000028010
Asap2	0.00179052	0.0670462	0.215	0.161	1	ENSMUSG00000052632
Gm9830	0.00179185	-0.00770834	0.03	0.056	1	ENSMUSG00000094437
Txnrd3	0.00179237	0.0277153	0.122	0.079	1	ENSMUSG00000000811
Gipc1	0.00179302	0.0193483	0.084	0.05	1	ENSMUSG00000019433
Cog7	0.00179428	0.0469865	0.266	0.201	1	ENSMUSG00000034951
Gm12933	0.00180188	0.0095176	0.027	0.009	1	ENSMUSG00000081210
St6galnac6	0.00180456	0.0238674	0.18	0.128	1	ENSMUSG00000026811
Rps23-ps2	0.00182143	-0.00523834	0.098	0.143	1	ENSMUSG00000066902
Cxcl1	0.00182568	0.0574178	0.154	0.108	1	ENSMUSG00000029380
Rbm39	0.0018288	-0.0268509	0.861	0.862	1	ENSMUSG00000027620
Tmem109	0.00183145	0.0331391	0.221	0.165	1	ENSMUSG00000034659
Trpc4ap	0.00183735	0.0791235	0.456	0.374	1	ENSMUSG00000038324
Capn9	0.00183979	0.00959725	0.018	0.004	1	ENSMUSG00000031981
1810008I18Rik	0.00184063	0.0243221	0.032	0.013	1	ENSMUSG00000100094
Rab1b	0.00184351	0.051133	0.59	0.491	1	ENSMUSG00000024870
Myl9	0.00185171	-0.0515067	0.099	0.139	1	ENSMUSG00000067818
Srsf1	0.00186351	-0.0733815	0.503	0.517	1	ENSMUSG00000018379
Chmp1b	0.00186756	0.0319513	0.221	0.161	1	ENSMUSG00000109901
Ccar1	0.00187216	-0.0588094	0.433	0.461	1	ENSMUSG00000020074
Kmt5a	0.00187242	-0.0499394	0.743	0.764	1	ENSMUSG00000049327
AL607131.1	0.0018756	0.0445897	0.402	0.337	1	ENSMUSG00000113424
Srprb	0.00188624	0.0373013	0.41	0.324	1	ENSMUSG00000032553
1810059H22Rik	0.00189588	0.0133832	0.032	0.013	1	ENSMUSG00000108207
Raph1	0.00191052	0.074941	0.575	0.487	1	ENSMUSG00000026014
Ddx3x	0.00192127	-0.023792	0.879	0.87	1	ENSMUSG00000000787
Syt14	0.00192236	-0.00943173	0	0.009	1	ENSMUSG00000016200
Gm22411	0.00192236	-0.00258964	0	0.009	1	ENSMUSG00000093203
Gm12532	0.00192236	-0.00663059	0	0.009	1	ENSMUSG00000084754
Lingo4	0.00192236	-0.00770299	0	0.009	1	ENSMUSG00000044505
Gm31363	0.00192236	-0.00663557	0	0.009	1	ENSMUSG00000105105
AC158802.1	0.00192236	-0.00938159	0	0.009	1	ENSMUSG00000112294
Mpc1-ps	0.00192236	-0.00622101	0	0.009	1	ENSMUSG00000091498
Gm25197	0.00192236	-0.00258964	0	0.009	1	ENSMUSG00000095943
52795	0.00192236	-0.00767387	0	0.009	1	NA
Gm31258	0.00192236	-0.0107586	0	0.009	1	ENSMUSG00000102289
53475	0.00192236	-0.00900872	0	0.009	1	NA
Prelid3a	0.00192236	-0.00651125	0	0.009	1	ENSMUSG00000024530
Slc38a3	0.00192299	-0.0534996	0.696	0.695	1	ENSMUSG00000010064
Tatdn1	0.00192485	0.0273655	0.098	0.061	1	ENSMUSG00000050891
Col5a3	0.00193061	0.00931429	0.016	0.003	1	ENSMUSG00000004098
Gm13414	0.00193685	-0.00874387	0.022	0.045	1	ENSMUSG00000087635
Gm13875	0.00194791	0.0091448	0.016	0.003	1	ENSMUSG00000081275
Fpgs	0.00195063	0.00865473	0.135	0.09	1	ENSMUSG00000009566
Psma3	0.00195214	0.0601424	0.663	0.584	1	ENSMUSG00000060073
Prpf19	0.00196124	0.0387696	0.311	0.237	1	ENSMUSG00000024735
Cpne2	0.00196319	0.0150992	0.204	0.148	1	ENSMUSG00000034361
Metrnl	0.00198194	0.0175258	0.115	0.075	1	ENSMUSG00000039208
Bgn	0.00198282	-0.00149138	0.987	0.991	1	ENSMUSG00000031375
Chordc1	0.00199009	-0.0520496	0.292	0.327	1	ENSMUSG00000001774
Tubb2b	0.00199027	0.0338452	0.205	0.151	1	ENSMUSG00000045136
Gm13237	0.00199373	-0.0133271	0.053	0.086	1	ENSMUSG00000095865
Eya2	0.0019988	0.00782688	0.013	0.002	1	ENSMUSG00000017897
Auts2	0.00200899	-0.0797343	0.475	0.508	1	ENSMUSG00000029673
Ccni	0.00201738	-0.0600199	0.796	0.818	1	ENSMUSG00000063015
Diras2	0.00202321	-0.0219213	0.029	0.054	1	ENSMUSG00000047842
Syt3	0.00202324	0.00805915	0.023	0.007	1	ENSMUSG00000030731
Shisa5	0.00204966	0.0440167	0.285	0.22	1	ENSMUSG00000025647
Dip2c	0.00205295	-0.0515672	0.079	0.115	1	ENSMUSG00000048264
Slc25a12	0.00205372	0.0295983	0.127	0.085	1	ENSMUSG00000027010
Gm13167	0.00205943	-0.0112573	0.048	0.079	1	ENSMUSG00000081671
Tmem147os	0.00206446	0.00642638	0.014	0.003	1	ENSMUSG00000097320
Wdr31	0.00206527	0.00402401	0.162	0.116	1	ENSMUSG00000028391
Aldh3b1	0.00206727	0.00668103	0.014	0.003	1	ENSMUSG00000024885
Cytl1	0.00207237	-0.140832	0.525	0.558	1	ENSMUSG00000062329
Cct7	0.00208567	0.0505494	0.401	0.314	1	ENSMUSG00000030007
Zwint	0.00208651	0.0466688	0.281	0.215	1	ENSMUSG00000019923
Gm20422	0.00208732	-0.00817504	0.002	0.013	1	ENSMUSG00000092544
Eif2b5	0.00209962	0.0354815	0.254	0.191	1	ENSMUSG00000003235
53052	0.00210239	-0.00439789	0.002	0.013	1	NA
Kctd10	0.00210676	0.0326627	0.246	0.185	1	ENSMUSG00000001098
Cntfr	0.00211376	-0.0813184	0.147	0.19	1	ENSMUSG00000028444
Ncl	0.00211714	-0.0520996	0.882	0.889	1	ENSMUSG00000026234
Oaf	0.00212931	0.0539475	0.491	0.404	1	ENSMUSG00000032014
AC153948.1	0.00212968	-0.0172253	0.059	0.093	1	ENSMUSG00000112149
Plk4	0.00213352	0.0545887	0.23	0.173	1	ENSMUSG00000025758
53871	0.00213542	0.0128439	0.025	0.009	1	NA
Arhgef12	0.00213964	-0.0683992	0.413	0.44	1	ENSMUSG00000059495
Ndufs2	0.00214128	0.0233967	0.46	0.366	1	ENSMUSG00000013593
Col4a3	0.00214608	0.00766484	0.008	0	1	ENSMUSG00000079465
Bdh2	0.00214608	0.00742505	0.008	0	1	ENSMUSG00000028167
Gm5735	0.00214608	0.0049797	0.008	0	1	ENSMUSG00000109171
Cdrt4	0.00214608	0.00638006	0.008	0	1	ENSMUSG00000042200
1700051A21Rik	0.00214608	0.00571097	0.008	0	1	ENSMUSG00000086951
Adap2os	0.00214608	0.00794054	0.008	0	1	ENSMUSG00000086507
Foxj1	0.00214608	0.00803131	0.008	0	1	ENSMUSG00000034227
Dmgdh	0.00214608	0.00633737	0.008	0	1	ENSMUSG00000042102
Jph4	0.00214608	0.0071865	0.008	0	1	ENSMUSG00000022208
Mas1	0.00214608	0.00569242	0.008	0	1	ENSMUSG00000068037
Myoz3	0.00214608	0.00458974	0.008	0	1	ENSMUSG00000049173
Tldc1	0.00216105	0.0236345	0.042	0.02	1	ENSMUSG00000034105
Zdhhc8	0.0021703	0.022288	0.254	0.189	1	ENSMUSG00000060166
Cyp2j5	0.00217166	-0.0176769	0.009	0.026	1	ENSMUSG00000052520
Ndufb6	0.00218175	0.0348822	0.468	0.376	1	ENSMUSG00000071014
Cdk16	0.00218906	0.00804981	0.278	0.21	1	ENSMUSG00000031065
Klhdc8a	0.00219175	0.00360551	0.025	0.009	1	ENSMUSG00000042115
Hacd1	0.00220192	0.0515017	0.493	0.414	1	ENSMUSG00000063275
Reps2	0.00220717	-0.0392203	0.103	0.141	1	ENSMUSG00000040855
Bmp2k	0.00221067	-0.0338817	0.043	0.072	1	ENSMUSG00000034663
Tpd52l1	0.00221589	0.0254843	0.132	0.089	1	ENSMUSG00000000296
Aph1a	0.00222063	0.0369383	0.406	0.317	1	ENSMUSG00000015750
Uba52	0.00222791	0.0502879	0.92	0.935	1	ENSMUSG00000090137
Gm8894	0.00224056	-0.0147703	0.014	0.033	1	ENSMUSG00000060680
Gm13864	0.00224222	-0.0156695	0.047	0.079	1	ENSMUSG00000082920
Uqcrq	0.00224561	0.0408237	0.707	0.645	1	ENSMUSG00000044894
Eif6	0.00225902	0.0132361	0.378	0.292	1	ENSMUSG00000027613
Ammecr1	0.00226546	-0.0613069	0.221	0.261	1	ENSMUSG00000042225
Camk4	0.0022656	-0.0469449	0.083	0.119	1	ENSMUSG00000038128
Isca2	0.00226665	0.0395947	0.237	0.179	1	ENSMUSG00000021241
Foxo6os	0.00227172	0.0191854	0.037	0.016	1	ENSMUSG00000084929
Cdc16	0.00227412	0.0651598	0.514	0.424	1	ENSMUSG00000038416
Ninj1	0.00227978	0.0155912	0.06	0.033	1	ENSMUSG00000037966
Ccdc51	0.00229264	0.00956131	0.036	0.016	1	ENSMUSG00000025645
Sgta	0.00230279	0.0499917	0.335	0.261	1	ENSMUSG00000004937
AU019990	0.00230802	-0.00707801	0.004	0.016	1	ENSMUSG00000074783
Rpusd3	0.00230875	0.0228738	0.077	0.045	1	ENSMUSG00000051169
Zfp800	0.00231796	-0.043523	0.118	0.157	1	ENSMUSG00000039841
Siah2	0.00232305	0.0642828	0.335	0.265	1	ENSMUSG00000036432
Them6	0.00233753	0.0135192	0.109	0.07	1	ENSMUSG00000056665
Gga1	0.00234938	0.0254925	0.119	0.078	1	ENSMUSG00000033128
Sec23b	0.00235705	0.0711423	0.499	0.406	1	ENSMUSG00000027429
Ctdspl	0.0023685	-0.0799397	0.5	0.515	1	ENSMUSG00000047409
Eif5a	0.00238157	0.0274325	0.888	0.887	1	ENSMUSG00000078812
Gm38299	0.00240452	0.0179387	0.097	0.061	1	ENSMUSG00000104277
Spsb1	0.00242819	0.0320634	0.443	0.349	1	ENSMUSG00000039911
Gm10705	0.00244289	-0.00856813	0.025	0.049	1	ENSMUSG00000074506
Pkdcc	0.00245003	-0.0579899	0.566	0.599	1	ENSMUSG00000024247
Slc25a35	0.00245419	-0.0235407	0.022	0.044	1	ENSMUSG00000018740
Mxd4	0.00246098	-0.0609644	0.635	0.633	1	ENSMUSG00000037235
AC171206.4	0.00248345	0.00969949	0.023	0.008	1	ENSMUSG00000111661
Rbbp7	0.00248806	-0.0575212	0.68	0.686	1	ENSMUSG00000031353
Gm7536	0.00249315	0.0141351	0.272	0.344	1	ENSMUSG00000057036
Rps12-ps16	0.00249653	0.0174829	0.068	0.039	1	ENSMUSG00000096437
Cald1	0.0025012	-0.0834752	0.441	0.462	1	ENSMUSG00000029761
St3gal3	0.00250424	0.0219567	0.147	0.101	1	ENSMUSG00000028538
Rps7	0.00251103	-0.0506252	0.934	0.964	1	ENSMUSG00000061477
Gfer	0.0025161	0.0207156	0.109	0.071	1	ENSMUSG00000040888
Spint2	0.00252012	-0.0434419	0.122	0.162	1	ENSMUSG00000074227
Eif1	0.00252237	-0.0154706	0.944	0.958	1	ENSMUSG00000035530
Fstl3	0.00252944	0.0198816	0.129	0.086	1	ENSMUSG00000020325
Sptbn1	0.00253948	-0.0670434	0.501	0.524	1	ENSMUSG00000020315
Hsp90aa1	0.00254552	-0.0288652	0.88	0.887	1	ENSMUSG00000021270
Tmem173	0.002556	0.0273448	0.047	0.023	1	ENSMUSG00000024349
Prkaca	0.00256513	0.0333687	0.206	0.151	1	ENSMUSG00000005469
Rps12-ps20	0.00263698	0.00698021	0.065	0.036	1	ENSMUSG00000094015
Abtb1	0.00263943	0.0128053	0.054	0.028	1	ENSMUSG00000030083
Mboat2	0.0026417	0.0270355	0.249	0.188	1	ENSMUSG00000020646
Prdm4	0.00264367	0.0157981	0.061	0.034	1	ENSMUSG00000035529
Gm7336	0.00264388	-0.0194538	0.514	0.598	1	ENSMUSG00000078636
Itgb1bp1	0.00266576	0.0136277	0.149	0.103	1	ENSMUSG00000062352
Lzts2	0.00266743	0.0150993	0.138	0.094	1	ENSMUSG00000035342
Ndel1	0.00267299	0.041373	0.442	0.343	1	ENSMUSG00000018736
Top1mt	0.00267381	0.0249063	0.068	0.039	1	ENSMUSG00000000934
Gm17511	0.00267515	0.012711	0.034	0.015	1	ENSMUSG00000090460
Pgrmc1	0.00267613	-0.0722915	0.39	0.411	1	ENSMUSG00000006373
Kdm2a	0.00268136	-0.0587388	0.422	0.442	1	ENSMUSG00000054611
Tmem104	0.00269048	-0.0308532	0.037	0.064	1	ENSMUSG00000045980
Rpl28-ps1	0.00269289	-0.0740188	0.495	0.544	1	ENSMUSG00000058603
Gm42674	0.00269327	0.00346015	0.023	0.008	1	ENSMUSG00000105518
Gm44768	0.00270006	0.0158573	0.032	0.013	1	ENSMUSG00000108496
Rps12-ps21	0.00271134	0.00612041	0.065	0.036	1	ENSMUSG00000096362
Dmpk	0.00271928	0.00864451	0.105	0.068	1	ENSMUSG00000030409
Pank2	0.002732	0.0246468	0.316	0.243	1	ENSMUSG00000037514
Tspan4	0.00273408	0.0314733	0.389	0.309	1	ENSMUSG00000025511
Slc50a1	0.00276342	0.00161648	0.213	0.156	1	ENSMUSG00000027953
Gm21974	0.00277405	-0.0346091	0.051	0.083	1	ENSMUSG00000030804
Tiparp	0.00278237	-0.0759322	0.469	0.492	1	ENSMUSG00000034640
Dcaf6	0.00278558	0.0563421	0.46	0.368	1	ENSMUSG00000026571
Cndp2	0.00281813	0.0243102	0.165	0.118	1	ENSMUSG00000024644
Mrps7	0.00283522	0.0294776	0.154	0.107	1	ENSMUSG00000046756
Tbc1d1	0.00283553	0.0244174	0.15	0.104	1	ENSMUSG00000029174
Mrpl10	0.00283591	0.0217332	0.237	0.173	1	ENSMUSG00000001445
Qars	0.00283705	0.0286554	0.192	0.138	1	ENSMUSG00000032604
Cavin1	0.00283739	0.039235	0.483	0.399	1	ENSMUSG00000004044
Noc3l	0.00284365	-0.0612342	0.134	0.173	1	ENSMUSG00000024999
mt-Co3	0.00286461	0.00981077	0.991	0.993	1	ENSMUSG00000064358
Pik3c2a	0.00288367	-0.059453	0.155	0.194	1	ENSMUSG00000030660
Cog2	0.00288807	0.0422842	0.267	0.204	1	ENSMUSG00000031979
Saraf	0.00289178	0.066883	0.61	0.531	1	ENSMUSG00000031532
Lrig3	0.00289705	-0.0875525	0.291	0.324	1	ENSMUSG00000020105
Mcm3ap	0.00290218	0.0162577	0.131	0.09	1	ENSMUSG00000001150
Zfp965	0.00290516	0.00249194	0.158	0.111	1	ENSMUSG00000078896
Dnajc30	0.00290878	0.0216883	0.215	0.158	1	ENSMUSG00000061118
Gid4	0.00292617	-0.0560746	0.194	0.234	1	ENSMUSG00000018415
Txnip	0.00292954	-0.0893705	0.434	0.464	1	ENSMUSG00000038393
Zfp652os	0.00293783	0.00826606	0.017	0.004	1	ENSMUSG00000086191
BC002163	0.00293854	0.0457641	0.479	0.41	1	ENSMUSG00000081824
1500009L16Rik	0.00294129	0.0159342	0.017	0.004	1	ENSMUSG00000087651
Gng10	0.00294894	0.0573107	0.66	0.592	1	ENSMUSG00000038607
Plppr4	0.00295465	-0.0600813	0.158	0.199	1	ENSMUSG00000044667
Alox12	0.00296154	0.037218	0.108	0.072	1	ENSMUSG00000000320
Elk3	0.00296183	0.0596058	0.357	0.292	1	ENSMUSG00000008398
Mef2c	0.00296192	0.109569	0.687	0.613	1	ENSMUSG00000005583
Abtb2	0.00296413	0.0184895	0.113	0.074	1	ENSMUSG00000032724
Gnpat	0.00297136	0.040877	0.246	0.186	1	ENSMUSG00000031985
Ccdc174	0.00297543	0.0278804	0.272	0.207	1	ENSMUSG00000034083
Rragb	0.0029789	-0.0137418	0.006	0.021	1	ENSMUSG00000041658
Gm20503	0.00298941	0.056595	0.662	0.594	1	ENSMUSG00000092345
Capns1	0.00299373	0.0592756	0.751	0.667	1	ENSMUSG00000001794
Map3k2	0.00299785	-0.0724314	0.225	0.261	1	ENSMUSG00000024383
Mrps18c	0.00300311	0.0422582	0.272	0.208	1	ENSMUSG00000016833
Map3k3	0.00300771	0.0271647	0.184	0.133	1	ENSMUSG00000020700
Ndn	0.00301325	0.0451756	0.327	0.255	1	ENSMUSG00000033585
Gdpd2	0.00301843	0.0145407	0.072	0.042	1	ENSMUSG00000019359
Gm13009	0.00301885	0.0062219	0.01	0.001	1	ENSMUSG00000082877
A730056A06Rik	0.00302148	-0.0213897	0.023	0.045	1	ENSMUSG00000097756
1810026B05Rik	0.0030239	-0.0456118	0.248	0.292	1	ENSMUSG00000101970
Snord13	0.00303254	0.0237194	0.167	0.118	1	ENSMUSG00000088252
Arl4c	0.00303579	0.0509186	0.172	0.126	1	ENSMUSG00000049866
Nckap5l	0.00304199	0.00128787	0.141	0.097	1	ENSMUSG00000023009
Cbln2	0.00305207	0.0190099	0.024	0.009	1	ENSMUSG00000024647
Stx2	0.00305703	0.0262383	0.2	0.146	1	ENSMUSG00000029428
Ndufs6	0.00306558	0.0808966	0.431	0.346	1	ENSMUSG00000021606
Get4	0.00307389	0.0389715	0.282	0.219	1	ENSMUSG00000025858
Ube2i	0.00307527	0.0392853	0.526	0.432	1	ENSMUSG00000015120
Rps2-ps13	0.0030786	-0.0114918	0.077	0.116	1	ENSMUSG00000081684
Shoc2	0.00307968	-0.0695888	0.267	0.301	1	ENSMUSG00000024976
Bag6	0.00309548	0.0334194	0.429	0.341	1	ENSMUSG00000024392
Hax1	0.00309933	0.026603	0.31	0.242	1	ENSMUSG00000027944
Alad	0.00310837	0.0200123	0.073	0.043	1	ENSMUSG00000028393
Pcp4	0.00310943	-0.0805955	0.066	0.097	1	ENSMUSG00000090223
Gm14391	0.00311168	-0.0125027	0.059	0.091	1	ENSMUSG00000078903
Grid2	0.00311772	-0.0101489	0.006	0.021	1	ENSMUSG00000071424
Cnot7	0.0031191	-0.064864	0.255	0.288	1	ENSMUSG00000031601
Gm7327	0.00312417	-0.0065303	0.006	0.021	1	ENSMUSG00000050900
Gss	0.00312615	0.0275781	0.096	0.062	1	ENSMUSG00000027610
Tmem222	0.00313106	0.0266454	0.195	0.141	1	ENSMUSG00000028857
Pigq	0.00313427	0.0315327	0.154	0.11	1	ENSMUSG00000025728
Thrap3	0.003158	-0.042561	0.752	0.756	1	ENSMUSG00000043962
Nol11	0.00316106	-0.0837862	0.203	0.239	1	ENSMUSG00000018433
Tssc4	0.00316965	0.0170923	0.161	0.115	1	ENSMUSG00000045752
Gm2676	0.00317107	0.00530153	0.015	0.003	1	ENSMUSG00000109055
Habp4	0.00317218	0.0288935	0.167	0.12	1	ENSMUSG00000021476
Gm6139	0.00321989	-0.00905313	0.077	0.116	1	ENSMUSG00000057244
Rps27l	0.00322457	0.0343019	0.569	0.471	1	ENSMUSG00000036781
Rhd	0.00322724	0.0129063	0.057	0.031	1	ENSMUSG00000028825
Scube3	0.00322771	0.0257842	0.03	0.012	1	ENSMUSG00000038677
Ttc5	0.00324372	0.0260632	0.168	0.12	1	ENSMUSG00000006288
Sra1	0.00325232	0.056741	0.715	0.621	1	ENSMUSG00000006050
Il1rl1	0.00325984	-0.0160155	0	0.008	1	ENSMUSG00000026069
Lhx6	0.00325984	-0.00714654	0	0.008	1	ENSMUSG00000026890
Pcsk2	0.00325984	-0.00640525	0	0.008	1	ENSMUSG00000027419
Chrna4	0.00325984	-0.0110193	0	0.008	1	ENSMUSG00000027577
8430422M14Rik	0.00325984	-0.0065522	0	0.008	1	ENSMUSG00000105095
Gm567	0.00325984	-0.00737203	0	0.008	1	ENSMUSG00000104610
Glis1	0.00325984	-0.00719786	0	0.008	1	ENSMUSG00000034762
Gm42467	0.00325984	-0.00646761	0	0.008	1	ENSMUSG00000106751
Igdcc3	0.00325984	-0.00646	0	0.008	1	ENSMUSG00000032394
Gm11973	0.00325984	-0.00821483	0	0.008	1	ENSMUSG00000086839
Sarm1	0.00325984	-0.00631738	0	0.008	1	ENSMUSG00000050132
Ccnb1ip1	0.00325984	-0.00336505	0	0.008	1	ENSMUSG00000071470
Ms4a2	0.00325984	-0.0069062	0	0.008	1	ENSMUSG00000024680
Gm45062	0.00326868	-0.0420802	0.365	0.406	1	ENSMUSG00000107705
Kcna6	0.00327489	-0.0649277	0.589	0.597	1	ENSMUSG00000038077
Cdipt	0.00328138	0.0189145	0.305	0.232	1	ENSMUSG00000030682
Gm44870	0.0032825	-0.00618189	0.023	0.046	1	ENSMUSG00000109484
Tubgcp3	0.00330205	0.0198444	0.156	0.11	1	ENSMUSG00000000759
Gm5356	0.00330855	0.0035996	0.015	0.003	1	ENSMUSG00000069962
Aurkaip1	0.00331041	0.0373882	0.29	0.221	1	ENSMUSG00000065990
Gm15459	0.00333054	-0.0703304	0.298	0.351	1	ENSMUSG00000100801
Minos1	0.00333455	0.0253888	0.437	0.352	1	ENSMUSG00000050608
Tram1l1	0.00334317	0.00758055	0.012	0.002	1	ENSMUSG00000044528
Pde7a	0.00334918	-0.0433272	0.113	0.148	1	ENSMUSG00000069094
Ndufv3	0.00335348	0.0586852	0.64	0.542	1	ENSMUSG00000024038
Ubn2	0.00335444	-0.069751	0.416	0.435	1	ENSMUSG00000038538
Gm8213	0.00335976	-0.000826703	0.094	0.135	1	ENSMUSG00000082474
Arhgdia	0.00336024	0.0642334	0.755	0.691	1	ENSMUSG00000025132
Noc4l	0.0033685	0.0284083	0.112	0.074	1	ENSMUSG00000033294
Gm38143	0.00336862	0.00726676	0.03	0.012	1	ENSMUSG00000102384
Rps2	0.00338122	0.0441211	0.915	0.92	1	ENSMUSG00000044533
Zfp612	0.00339035	-0.0116637	0.002	0.012	1	ENSMUSG00000044676
Foxd2	0.00339744	-0.0589406	0.191	0.232	1	ENSMUSG00000055210
Gm6155	0.00340265	0.00535022	0.012	0.002	1	ENSMUSG00000068629
Nxn	0.0034166	0.0211086	0.182	0.131	1	ENSMUSG00000020844
Ackr4	0.00341894	0.00971429	0.032	0.014	1	ENSMUSG00000079355
Rarg	0.00342223	-0.0466322	0.646	0.643	1	ENSMUSG00000001288
Myom1	0.00342576	-0.0133048	0.005	0.019	1	ENSMUSG00000024049
Cables1	0.00343148	0.0142675	0.039	0.018	1	ENSMUSG00000040957
2810029C07Rik	0.00345055	0.0159597	0.066	0.038	1	ENSMUSG00000096995
Akap11	0.00345159	-0.0607192	0.356	0.387	1	ENSMUSG00000022016
Gm7117	0.00345285	0.0094408	0.027	0.01	1	ENSMUSG00000063442
Spred1	0.00346095	-0.0745151	0.392	0.423	1	ENSMUSG00000027351
Hk2	0.00346642	0.0365164	0.209	0.155	1	ENSMUSG00000000628
Efcab1	0.00347836	-0.0702186	0.406	0.431	1	ENSMUSG00000068617
Tmem43	0.00348386	0.0234773	0.242	0.18	1	ENSMUSG00000030095
Gsr	0.00349677	0.0258438	0.185	0.136	1	ENSMUSG00000031584
Uqcr10	0.00351014	0.042035	0.481	0.398	1	ENSMUSG00000059534
Pdgfra	0.00351165	0.00731146	0.036	0.016	1	ENSMUSG00000029231
Pdcl3	0.00351488	0.0280703	0.234	0.174	1	ENSMUSG00000026078
Zmym3	0.00354827	0.0162104	0.103	0.067	1	ENSMUSG00000031310
Hist1h2ae	0.0035531	-0.00741151	0.026	0.049	1	ENSMUSG00000069272
Pycr1	0.00355585	0.0459927	0.455	0.368	1	ENSMUSG00000025140
Vps41	0.00355713	-0.0746975	0.358	0.383	1	ENSMUSG00000041236
Cul3	0.00357981	-0.0450729	0.61	0.619	1	ENSMUSG00000004364
Eno1	0.0036067	-0.0518834	0.743	0.771	1	ENSMUSG00000063524
Rnaseh1	0.00361312	0.0139128	0.135	0.091	1	ENSMUSG00000020630
Phlpp2	0.00361336	-0.0299239	0.054	0.085	1	ENSMUSG00000031732
Tmem55b	0.00361725	0.0240386	0.233	0.174	1	ENSMUSG00000035953
Ufm1	0.00362468	0.0250738	0.408	0.338	1	ENSMUSG00000027746
Txndc11	0.00362873	0.0402753	0.333	0.259	1	ENSMUSG00000022498
Gm8756	0.00362895	0.025549	0.059	0.034	1	ENSMUSG00000098238
Adpgk	0.00363185	0.0343826	0.316	0.248	1	ENSMUSG00000025236
Gm15950	0.00366674	0.00103046	0.134	0.092	1	ENSMUSG00000089818
Trip6	0.0036689	0.0208074	0.214	0.158	1	ENSMUSG00000023348
P3h3	0.00369406	0.0570106	0.536	0.459	1	ENSMUSG00000023191
Angptl4	0.00371228	0.00876147	0.02	0.006	1	ENSMUSG00000002289
Dctpp1	0.00372599	0.0131556	0.081	0.05	1	ENSMUSG00000042462
Mga	0.00373165	-0.0560178	0.368	0.4	1	ENSMUSG00000033943
Bbx	0.0037659	-0.0601573	0.504	0.517	1	ENSMUSG00000022641
Ahcyl1	0.00377127	-0.0685494	0.32	0.353	1	ENSMUSG00000027893
Pdlim2	0.00377459	0.0346898	0.068	0.041	1	ENSMUSG00000022090
Gm11847	0.00377745	-0.0156589	0.035	0.061	1	ENSMUSG00000060989
Tcfl5	0.00378311	-0.0325479	0.03	0.053	1	ENSMUSG00000038932
Pigs	0.00378863	0.0430203	0.342	0.268	1	ENSMUSG00000041958
Ptp4a2	0.00379074	-0.0445698	0.867	0.862	1	ENSMUSG00000028788
Hnrnpa0	0.00381057	-0.012505	0.867	0.863	1	ENSMUSG00000007836
Morf4l2	0.00381328	-0.0388277	0.895	0.916	1	ENSMUSG00000031422
AC159819.3	0.00381545	0.00524846	0.007	0	1	ENSMUSG00000111343
Gm28362	0.00381545	0.000938645	0.007	0	1	ENSMUSG00000099615
1700084C06Rik	0.00381545	0.00600219	0.007	0	1	ENSMUSG00000086016
Gm16166	0.00381545	0.00358106	0.007	0	1	ENSMUSG00000082936
Avil	0.00381545	0.00706934	0.007	0	1	ENSMUSG00000025432
A530084C06Rik	0.00381545	0.00523396	0.007	0	1	ENSMUSG00000090863
A830005F24Rik	0.00381545	0.0047097	0.007	0	1	ENSMUSG00000053181
Gm17382	0.00381545	0.00489716	0.007	0	1	ENSMUSG00000078838
Fsd1	0.00381545	0.0048969	0.007	0	1	ENSMUSG00000011589
Zfp738	0.00381721	-0.0395397	0.079	0.113	1	ENSMUSG00000048280
Mapkapk5	0.00382744	0.0152513	0.194	0.146	1	ENSMUSG00000029454
Gm6740	0.00384695	-0.00106401	0.008	0.023	1	ENSMUSG00000105061
Corin	0.0038492	-0.0323829	0.043	0.071	1	ENSMUSG00000005220
Plpp1	0.00386539	0.0539206	0.469	0.396	1	ENSMUSG00000021759
9130230N09Rik	0.00388526	0.0166394	0.041	0.02	1	ENSMUSG00000092626
Apoe	0.00388918	-0.108	0.22	0.26	1	ENSMUSG00000002985
Gm9703	0.00389567	0.0210428	0.109	0.072	1	ENSMUSG00000082741
Rpl17-ps1	0.00391443	0.0140665	0.028	0.011	1	ENSMUSG00000082804
Gm3511	0.00393126	0.0262519	0.1	0.066	1	ENSMUSG00000105031
Olfr875	0.0039521	0.0167202	0.055	0.03	1	ENSMUSG00000058628
Mrpl14	0.00395588	0.0328679	0.317	0.247	1	ENSMUSG00000023939
Gm6341	0.0039679	-0.013366	0.064	0.097	1	ENSMUSG00000083121
Rcc1l	0.00396876	0.0115324	0.059	0.033	1	ENSMUSG00000061979
Zcchc10	0.00397585	0.0172695	0.207	0.151	1	ENSMUSG00000018239
Hist1h2ab	0.003978	-0.00371273	0.023	0.044	1	ENSMUSG00000061615
Srrm1	0.00401352	-0.0356131	0.783	0.771	1	ENSMUSG00000028809
Map1a	0.00402476	0.0312341	0.262	0.201	1	ENSMUSG00000027254
Zfp979	0.00402913	-0.0172255	0.01	0.026	1	ENSMUSG00000066000
Gja1	0.00403867	0.0347508	0.346	0.273	1	ENSMUSG00000050953
Palld	0.00403868	0.013053	0.051	0.028	1	ENSMUSG00000058056
Ccser2	0.00406477	-0.0630935	0.356	0.381	1	ENSMUSG00000058690
Ccdc124	0.00408212	0.011455	0.154	0.109	1	ENSMUSG00000007721
Angpt4	0.00409506	0.0116996	0.018	0.005	1	ENSMUSG00000027460
S100a16	0.00409569	0.0294155	0.453	0.37	1	ENSMUSG00000074457
54353	0.00410531	0.0110138	0.028	0.011	1	NA
Hars	0.00411907	0.0347652	0.254	0.194	1	ENSMUSG00000001380
AC159815.1	0.00412527	0.0314026	0.068	0.04	1	ENSMUSG00000113368
Ap2s1	0.00417059	0.0212976	0.154	0.11	1	ENSMUSG00000008036
Ppie	0.00418498	0.00909004	0.116	0.079	1	ENSMUSG00000028651
Crispld2	0.00418682	-0.0600375	0.709	0.726	1	ENSMUSG00000031825
Gm5611	0.00418967	0.00739378	0.028	0.011	1	ENSMUSG00000090602
Gm35507	0.00420219	0.00484595	0.025	0.009	1	ENSMUSG00000105102
Fkbp1a	0.00421691	0.0576681	0.798	0.744	1	ENSMUSG00000032966
Wdr6	0.00422363	-0.0609413	0.533	0.538	1	ENSMUSG00000066357
Snrnp27	0.00423585	0.0473538	0.451	0.362	1	ENSMUSG00000001158
Rif1	0.00423773	-0.0593493	0.269	0.305	1	ENSMUSG00000036202
Gm10093	0.00423932	-0.0296367	0.084	0.118	1	ENSMUSG00000061062
Slfn5	0.0042508	0.0238272	0.097	0.064	1	ENSMUSG00000054404
Smim10l1	0.00425668	-0.0388147	0.712	0.714	1	ENSMUSG00000072704
Ctsb	0.00426209	-0.0156131	0.859	0.851	1	ENSMUSG00000021939
Glt8d1	0.0042677	0.0353496	0.337	0.261	1	ENSMUSG00000021916
Cirbp	0.00427939	0.0137442	0.131	0.09	1	ENSMUSG00000045193
Myo6	0.00428159	-0.0683883	0.455	0.475	1	ENSMUSG00000033577
Man1a	0.00429135	-0.0639095	0.187	0.224	1	ENSMUSG00000003746
4430402I18Rik	0.00430227	0.00712595	0.018	0.005	1	ENSMUSG00000064202
4930533O14Rik	0.00430519	0.023946	0.161	0.116	1	ENSMUSG00000063904
Mrps21	0.00431766	0.0476966	0.584	0.499	1	ENSMUSG00000054312
Ube2q2	0.00432427	-0.0545643	0.197	0.235	1	ENSMUSG00000032307
Zyg11b	0.00434104	-0.0727975	0.226	0.266	1	ENSMUSG00000034636
Gm3788	0.00435763	-0.0146164	0.007	0.022	1	ENSMUSG00000094392
Gm21986	0.00436414	0.0266003	0.211	0.16	1	ENSMUSG00000096056
Gm4204	0.00437887	-0.0541471	0.175	0.218	1	ENSMUSG00000079139
Mat2b	0.0043801	0.0580933	0.527	0.442	1	ENSMUSG00000042032
Gm6311	0.00438023	-0.0109225	0.083	0.121	1	ENSMUSG00000061833
Vps16	0.00440729	0.0180944	0.106	0.071	1	ENSMUSG00000027411
Gm8724	0.00441202	0.0241339	0.076	0.047	1	ENSMUSG00000057370
Enpp1	0.0044304	-0.0864894	0.632	0.626	1	ENSMUSG00000037370
Eci1	0.0044363	0.018704	0.194	0.142	1	ENSMUSG00000024132
52929	0.00451544	0.0298347	0.158	0.114	1	NA
Dync1li2	0.00452871	0.030184	0.252	0.191	1	ENSMUSG00000035770
Thop1	0.00452934	0.0155067	0.049	0.026	1	ENSMUSG00000004929
Rora	0.00455706	-0.0588097	0.459	0.478	1	ENSMUSG00000032238
Snx12	0.00455821	0.0420336	0.278	0.211	1	ENSMUSG00000046032
Sec24d	0.00457171	0.0334677	0.461	0.378	1	ENSMUSG00000039234
Cyp2j6	0.00458899	-0.0660673	0.23	0.263	1	ENSMUSG00000052914
Ttf1	0.00459636	0.0603271	0.384	0.32	1	ENSMUSG00000026803
Obsl1	0.00460886	0.0348876	0.316	0.244	1	ENSMUSG00000026211
Enox1	0.00461344	0.0153447	0.049	0.026	1	ENSMUSG00000022012
Cox4i2	0.00461467	0.0224532	0.311	0.246	1	ENSMUSG00000009876
Tmem171	0.00462125	-0.0415023	0.038	0.063	1	ENSMUSG00000052485
Maf	0.00464663	0.0387082	0.078	0.049	1	ENSMUSG00000055435
Rabgap1l	0.00465531	-0.0744446	0.327	0.355	1	ENSMUSG00000026721
52489	0.00465962	0.00752821	0.07	0.042	1	NA
H2-Ke6	0.00466193	-0.00108461	0.016	0.035	1	ENSMUSG00000073422
Casz1	0.00467209	0.0144889	0.016	0.004	1	ENSMUSG00000028977
Gm24924	0.00467314	-0.0225835	0.079	0.112	1	ENSMUSG00000094306
Snhg9	0.00468387	0.0177999	0.179	0.129	1	ENSMUSG00000090101
53394	0.0046928	0.00441129	0.034	0.016	1	NA
Gga2	0.0046958	0.0459096	0.446	0.363	1	ENSMUSG00000030872
52760	0.00470115	0.00976547	0.021	0.007	1	NA
Ube2s	0.0047047	0.0510185	0.582	0.485	1	ENSMUSG00000060860
Tax1bp3	0.00472304	0.0203604	0.176	0.128	1	ENSMUSG00000040158
Gm5687	0.00472503	0.00870489	0.056	0.031	1	ENSMUSG00000080866
mt-Nd1	0.004769	0.0270778	0.994	0.994	1	ENSMUSG00000064341
Cox10	0.00480286	0.0251864	0.122	0.084	1	ENSMUSG00000042148
AC132265.1	0.00483383	-0.00567477	0.001	0.009	1	ENSMUSG00000111977
Ncln	0.00483625	0.00337002	0.154	0.109	1	ENSMUSG00000020238
Slc35b2	0.0048437	0.029594	0.437	0.344	1	ENSMUSG00000037089
Lgals1	0.00484588	0.0196028	0.032	0.014	1	ENSMUSG00000068220
Ppp1r3c	0.00484688	-0.0533323	0.105	0.141	1	ENSMUSG00000067279
Gm6394	0.00486426	0.00549082	0.016	0.004	1	ENSMUSG00000104623
Saal1	0.00486706	0.0133182	0.107	0.071	1	ENSMUSG00000006763
Calm2	0.00486847	-0.0260882	0.855	0.854	1	ENSMUSG00000036438
Maged2	0.00487246	0.0506232	0.616	0.53	1	ENSMUSG00000025268
Necab3	0.00489229	0.00610686	0.016	0.004	1	ENSMUSG00000027489
Adam22	0.00490266	-0.0228768	0.026	0.048	1	ENSMUSG00000040537
53830	0.00490768	0.026245	0.275	0.211	1	NA
R3hdm1	0.00491582	-0.0647003	0.243	0.274	1	ENSMUSG00000056211
Abhd5	0.00491955	0.0375262	0.22	0.164	1	ENSMUSG00000032540
Myrip	0.00493137	-0.0239717	0.04	0.066	1	ENSMUSG00000041794
Myof	0.00493516	0.0175701	0.16	0.115	1	ENSMUSG00000048612
Hist1h2ad	0.00493823	-0.0034735	0.031	0.054	1	ENSMUSG00000071478
Itpkc	0.00494057	0.0185564	0.084	0.053	1	ENSMUSG00000003752
Mirg	0.00494519	0.00987684	0.057	0.032	1	ENSMUSG00000097391
Pold2	0.0049478	0.013986	0.137	0.096	1	ENSMUSG00000020471
Top3b	0.00495151	0.0259241	0.106	0.071	1	ENSMUSG00000022779
Ccng2	0.0049538	0.0315184	0.097	0.065	1	ENSMUSG00000029385
Dnajc19	0.0049606	0.0376281	0.373	0.3	1	ENSMUSG00000027679
Tigar	0.00497539	0.0144951	0.046	0.024	1	ENSMUSG00000038028
Btg3	0.00498154	0.0482009	0.5	0.432	1	ENSMUSG00000022863
Naxd	0.00499	0.0309961	0.446	0.362	1	ENSMUSG00000031505
Rabl3	0.00499975	0.0300602	0.137	0.097	1	ENSMUSG00000022827
Six1	0.00501154	0.0132093	0.035	0.016	1	ENSMUSG00000051367
Txn-ps1	0.00503101	0.0146824	0.023	0.009	1	ENSMUSG00000101567
Aldoc	0.00504822	0.0277433	0.137	0.097	1	ENSMUSG00000017390
Atp6ap1	0.00504957	0.0497367	0.603	0.501	1	ENSMUSG00000019087
Svbp	0.00506042	0.0418402	0.356	0.281	1	ENSMUSG00000028643
Med16	0.00506933	0.0264547	0.168	0.124	1	ENSMUSG00000013833
Gm17131	0.00508114	-0.0262511	0.14	0.18	1	ENSMUSG00000085328
Rest	0.00509948	-0.0595867	0.243	0.275	1	ENSMUSG00000029249
Copz2	0.0051293	0.0887615	0.723	0.643	1	ENSMUSG00000018672
Dync1i1	0.00514165	-0.0864448	0.34	0.362	1	ENSMUSG00000029757
Gcn1l1	0.00516519	0.026323	0.212	0.16	1	ENSMUSG00000041638
Sptlc2	0.00518023	0.0373468	0.397	0.32	1	ENSMUSG00000021036
Slc6a8	0.00518439	0.0176096	0.178	0.13	1	ENSMUSG00000019558
Gm28530	0.00519795	0.0303871	0.047	0.025	1	ENSMUSG00000101452
Tmem14c	0.00520322	0.0398087	0.566	0.482	1	ENSMUSG00000021361
Rps23	0.00521618	0.0240811	0.939	0.959	1	ENSMUSG00000049517
Tmem245	0.00521965	0.0426962	0.3	0.239	1	ENSMUSG00000055296
Rpl15-ps3	0.00522165	-0.0408001	0.444	0.516	1	ENSMUSG00000061167
AI838599	0.00522382	0.00585008	0.009	0.001	1	ENSMUSG00000085180
Prkg2	0.00523382	-0.0182218	0.913	0.909	1	ENSMUSG00000029334
Ets1	0.00523573	0.0437456	0.393	0.323	1	ENSMUSG00000032035
2310039H08Rik	0.00525186	0.0234311	0.164	0.118	1	ENSMUSG00000062619
Uaca	0.00526183	0.0173999	0.131	0.091	1	ENSMUSG00000034485
Tm9sf4	0.00526264	-0.0649824	0.421	0.429	1	ENSMUSG00000068040
Phf11a	0.00527822	0.0040484	0.014	0.003	1	ENSMUSG00000044703
Mdm4	0.00528025	-0.0546872	0.151	0.188	1	ENSMUSG00000054387
Rpl14	0.00529432	-0.0486711	0.882	0.909	1	ENSMUSG00000025794
Wbp1l	0.00529591	0.029581	0.161	0.116	1	ENSMUSG00000047731
2810001G20Rik	0.00529804	-0.0925546	0.509	0.522	1	ENSMUSG00000087497
Gm21596	0.00529888	-0.0299698	0.199	0.248	1	ENSMUSG00000096006
D130017N08Rik	0.00530013	-0.0324079	0.06	0.09	1	ENSMUSG00000097287
Upk1b	0.00530967	-0.0233233	0.008	0.022	1	ENSMUSG00000049436
Arpc1a	0.00531025	0.0469683	0.645	0.56	1	ENSMUSG00000029621
A430106G13Rik	0.00531057	0.0113242	0.014	0.003	1	ENSMUSG00000098206
Rbm45	0.00532627	0.0204395	0.199	0.148	1	ENSMUSG00000042369
Adam9	0.00533294	0.0253533	0.219	0.164	1	ENSMUSG00000031555
Fdx1	0.00533855	0.0306075	0.338	0.263	1	ENSMUSG00000032051
Lamb1	0.00534962	0.00515045	0.014	0.003	1	ENSMUSG00000002900
Gm16185	0.00535288	0.012612	0.032	0.015	1	ENSMUSG00000084911
Rnaset2a	0.00537268	0.0554083	0.643	0.574	1	ENSMUSG00000095687
Slc44a2	0.00539356	0.085218	0.894	0.875	1	ENSMUSG00000057193
Col12a1	0.00540649	-0.0448065	0.831	0.86	1	ENSMUSG00000032332
Ak1	0.0054472	0.0391294	0.44	0.347	1	ENSMUSG00000026817
Mettl26	0.00545815	0.0160619	0.155	0.109	1	ENSMUSG00000025731
2900060B14Rik	0.00547421	0.0168395	0.054	0.03	1	ENSMUSG00000107722
Phf20l1	0.00548659	-0.0636884	0.265	0.294	1	ENSMUSG00000072501
Slc35c1	0.00553045	0.0287706	0.171	0.124	1	ENSMUSG00000049922
Acp2	0.00554046	-0.0515407	0.303	0.335	1	ENSMUSG00000002103
Slc25a1	0.00554181	0.0509584	0.416	0.341	1	ENSMUSG00000003528
Bcl3	0.00554349	0.0081788	0.101	0.066	1	ENSMUSG00000053175
Snrpb	0.00554525	0.0560222	0.727	0.636	1	ENSMUSG00000027404
Rhobtb3	0.00554611	0.019301	0.203	0.151	1	ENSMUSG00000021589
Hhip	0.00554917	-0.131747	0.421	0.45	1	ENSMUSG00000064325
Zkscan17	0.00554969	0.00920022	0.242	0.181	1	ENSMUSG00000020472
Gm15834	0.00555077	-0.00490733	0	0.007	1	ENSMUSG00000085054
C1ql3	0.00555077	-0.00482769	0	0.007	1	ENSMUSG00000049630
Hdc	0.00555077	-0.00642377	0	0.007	1	ENSMUSG00000027360
Gm14122	0.00555077	-0.00281382	0	0.007	1	ENSMUSG00000083964
Snhg11	0.00555077	-0.00980538	0	0.007	1	ENSMUSG00000044349
Ccna1	0.00555077	-0.0088563	0	0.007	1	ENSMUSG00000027793
Gm11217	0.00555077	-0.00304397	0	0.007	1	ENSMUSG00000085032
Gm43513	0.00555077	-0.00468989	0	0.007	1	ENSMUSG00000105607
Dnah10	0.00555077	-0.00706139	0	0.007	1	ENSMUSG00000038011
Gm5596	0.00555077	-0.00515734	0	0.007	1	ENSMUSG00000109086
Gm45213	0.00555077	-0.0049556	0	0.007	1	ENSMUSG00000108793
Gm45805	0.00555077	-0.00606077	0	0.007	1	ENSMUSG00000110626
Gm45494	0.00555077	-0.00639173	0	0.007	1	ENSMUSG00000110161
Trank1	0.00555077	-0.00514294	0	0.007	1	ENSMUSG00000062296
52592	0.00555077	-0.00422005	0	0.007	1	NA
Ccdc65	0.00555077	-0.00558928	0	0.007	1	ENSMUSG00000003354
52366	0.00555077	-0.0100068	0	0.007	1	NA
Rell2	0.00555077	-0.00528931	0	0.007	1	ENSMUSG00000044024
Kcnip2	0.00555077	-0.00750293	0	0.007	1	ENSMUSG00000025221
Pou3f3	0.00555217	-0.0101003	0.005	0.016	1	ENSMUSG00000045515
C1qtnf12	0.00556138	0.0191858	0.121	0.082	1	ENSMUSG00000023571
Nt5dc1	0.00557101	0.0286747	0.131	0.093	1	ENSMUSG00000039480
Vopp1	0.00559315	0.0113593	0.156	0.111	1	ENSMUSG00000037788
Kif2a	0.0055964	-0.0667815	0.368	0.398	1	ENSMUSG00000021693
Gm11336	0.00559939	-0.0013515	0.018	0.037	1	ENSMUSG00000080999
AC124426.4	0.00560716	-0.00892137	0.008	0.022	1	ENSMUSG00000113836
Bad	0.00560843	0.00685897	0.263	0.201	1	ENSMUSG00000024959
Gm8520	0.00561753	0.0100706	0.07	0.043	1	ENSMUSG00000100922
Tcp11l2	0.00562204	0.0255859	0.158	0.115	1	ENSMUSG00000020034
Apbb1ip	0.00563799	-0.0115607	0.002	0.011	1	ENSMUSG00000026786
Nrm	0.00564161	0.0330097	0.212	0.16	1	ENSMUSG00000059791
Rabl6	0.00564255	0.053185	0.431	0.349	1	ENSMUSG00000015087
Gm10702	0.00565169	-0.00991058	0.005	0.016	1	ENSMUSG00000074467
Zfp787	0.00565169	0.0130955	0.219	0.161	1	ENSMUSG00000046792
Zfp445	0.00565229	-0.0722415	0.405	0.42	1	ENSMUSG00000047036
Gm4202	0.00566173	-0.0134195	0.002	0.011	1	ENSMUSG00000091421
Ago1	0.00567577	-0.0543524	0.159	0.197	1	ENSMUSG00000041530
Usb1	0.00568314	0.00614291	0.086	0.054	1	ENSMUSG00000031792
Gm8425	0.00568844	0.00439142	0.013	0.003	1	ENSMUSG00000091786
Gm13532	0.00569499	0.0186873	0.036	0.017	1	ENSMUSG00000081642
Tusc3	0.00569853	0.0204094	0.247	0.188	1	ENSMUSG00000039530
Atg101	0.00570052	0.00696473	0.092	0.059	1	ENSMUSG00000037204
Fam169b	0.00570342	0.0040992	0.013	0.003	1	ENSMUSG00000074071
Zbtb14	0.00571056	-0.0396042	0.08	0.112	1	ENSMUSG00000049672
Lig4	0.0057138	0.0272138	0.175	0.127	1	ENSMUSG00000049717
Os9	0.0057271	-0.0370597	0.783	0.785	1	ENSMUSG00000040462
Csnk1g2	0.00573237	0.0477588	0.414	0.331	1	ENSMUSG00000003345
Acot1	0.00573365	0.0331085	0.265	0.205	1	ENSMUSG00000072949
Gm6855	0.00574858	0.00391252	0.013	0.003	1	ENSMUSG00000108571
Gm11826	0.00574875	0.0133743	0.03	0.013	1	ENSMUSG00000083328
Gm38247	0.00575491	0.00629467	0.011	0.002	1	ENSMUSG00000104166
Fgf7	0.00575614	0.0145918	0.013	0.003	1	ENSMUSG00000027208
S1pr1	0.00575883	-0.0127231	0.008	0.022	1	ENSMUSG00000045092
Slc6a9	0.0057627	0.0235751	0.209	0.155	1	ENSMUSG00000028542
Inpp5a	0.00576322	0.025558	0.132	0.093	1	ENSMUSG00000025477
Wdr18	0.00577148	0.0219532	0.132	0.093	1	ENSMUSG00000035754
Gm12165	0.00577415	0.00651008	0.019	0.006	1	ENSMUSG00000082870
Tmem41a	0.00577438	0.00331436	0.117	0.079	1	ENSMUSG00000022856
Gm12504	0.00578685	0.00810088	0.05	0.027	1	ENSMUSG00000084274
Dr1	0.00579016	-0.0588331	0.237	0.274	1	ENSMUSG00000029265
Cep85l	0.00579589	0.0402857	0.21	0.16	1	ENSMUSG00000038594
Suclg1	0.00580327	0.0311205	0.451	0.363	1	ENSMUSG00000052738
Gm6851	0.00580514	-0.00797758	0.209	0.154	1	ENSMUSG00000056836
Rpl36-ps8	0.00582186	0.00321178	0.011	0.002	1	ENSMUSG00000075390
Gm5745	0.00582186	0.00321178	0.011	0.002	1	ENSMUSG00000066478
Ndufa8	0.00582361	0.0308566	0.554	0.463	1	ENSMUSG00000026895
Pet100	0.00583495	0.0455797	0.303	0.236	1	ENSMUSG00000087687
Edc4	0.0058592	0.0359893	0.263	0.205	1	ENSMUSG00000036270
Mrps11	0.00587029	0.0185437	0.064	0.038	1	ENSMUSG00000030611
Lyplal1	0.00587916	0.0147108	0.156	0.111	1	ENSMUSG00000039246
Anp32e	0.00588163	-0.0676331	0.605	0.595	1	ENSMUSG00000015749
Mmgt1	0.00588889	-0.0735453	0.3	0.333	1	ENSMUSG00000061273
Dsel	0.00590299	-0.066056	0.207	0.242	1	ENSMUSG00000038702
Psmc4	0.0059039	0.037517	0.32	0.253	1	ENSMUSG00000030603
Sox6	0.00593227	-0.0506219	0.532	0.546	1	ENSMUSG00000051910
Lypla1	0.00594178	0.0429092	0.299	0.233	1	ENSMUSG00000025903
Clec11a	0.00595632	-0.053758	0.794	0.832	1	ENSMUSG00000004473
Mgst2	0.00595681	-0.0430268	0.206	0.248	1	ENSMUSG00000074604
Rida	0.00596251	0.00428805	0.186	0.137	1	ENSMUSG00000022323
Gm43778	0.00597512	0.0255086	0.103	0.069	1	ENSMUSG00000105186
Fry	0.00598622	0.0481498	0.483	0.401	1	ENSMUSG00000056602
A930033H14Rik	0.00600634	0.0158956	0.024	0.009	1	ENSMUSG00000090622
H2-Q6	0.00600854	0.0214403	0.044	0.023	1	ENSMUSG00000073409
Gm14567	0.00603084	0.0137263	0.191	0.142	1	ENSMUSG00000080896
Gm21860	0.00603295	0.00746235	0.022	0.008	1	ENSMUSG00000095366
Pou6f2	0.0060386	-0.0365073	0.037	0.061	1	ENSMUSG00000009734
Dmtn	0.00604021	0.00961341	0.055	0.031	1	ENSMUSG00000022099
Unc50	0.00604978	0.070922	0.63	0.544	1	ENSMUSG00000026111
Khsrp	0.00605133	-0.0495186	0.599	0.606	1	ENSMUSG00000007670
Eno1b	0.0060544	0.0643071	0.734	0.673	1	ENSMUSG00000059040
Gm8055	0.00607094	0.018631	0.092	0.06	1	ENSMUSG00000096171
Eif2b1	0.00607412	0.0317973	0.277	0.217	1	ENSMUSG00000029388
Zfp973	0.00615027	-0.00065264	0.069	0.042	1	ENSMUSG00000078879
Rtn4	0.00615825	0.0495347	0.562	0.471	1	ENSMUSG00000020458
Tor2a	0.00617661	0.0161108	0.284	0.215	1	ENSMUSG00000009563
Rpl18-ps1	0.0061884	0.0245742	0.048	0.026	1	ENSMUSG00000081382
Tmem208	0.00619616	0.0313645	0.271	0.211	1	ENSMUSG00000014856
Efna1	0.0061982	0.0377154	0.096	0.065	1	ENSMUSG00000027954
Mir99ahg	0.00623381	0.0412728	0.219	0.167	1	ENSMUSG00000090386
Rpl7	0.0062361	0.0441069	0.938	0.945	1	ENSMUSG00000043716
Srxn1	0.00624685	0.0203661	0.077	0.049	1	ENSMUSG00000032802
Spock2	0.00626092	-0.0248128	0.032	0.054	1	ENSMUSG00000058297
Vsir	0.00627524	0.0332759	0.101	0.068	1	ENSMUSG00000020101
Cdca4	0.00627544	0.0281842	0.24	0.186	1	ENSMUSG00000047832
53776	0.00627561	0.00875596	0.024	0.009	1	NA
Amotl1	0.00627698	-0.0221393	0.696	0.697	1	ENSMUSG00000013076
Gm17494	0.00627909	0.0551825	0.284	0.233	1	ENSMUSG00000057359
AL607105.1	0.00628583	-0.0226249	0.185	0.238	1	ENSMUSG00000113061
Epn2	0.00628647	0.042727	0.202	0.155	1	ENSMUSG00000001036
4932438A13Rik	0.00632213	-0.0739027	0.337	0.362	1	ENSMUSG00000037270
Asphd2	0.00632577	0.0228106	0.109	0.074	1	ENSMUSG00000029348
Degs1	0.0063444	0.0505197	0.646	0.561	1	ENSMUSG00000038633
[truncated: 18,089 more rows]

## Sheet: Osteoblast
gene_name	p_val	avg_log2FC	pct.1	pct.2	p_val_adj	ensembl
Gm42418	4.17438e-39	-0.428958	0.986	0.998	8.3855e-35	ENSMUSG00000098178
mt-Atp8	7.59632e-25	-0.347013	0.982	1	1.52595e-20	ENSMUSG00000064356
Fos	3.3552e-24	0.596068	0.637	0.32	6.73993e-20	ENSMUSG00000021250
mt-Nd4l	1.35541e-22	-0.356137	0.988	0.996	2.72274e-18	ENSMUSG00000065947
mt-Nd5	5.24518e-22	-0.315952	1	0.996	1.05365e-17	ENSMUSG00000064367
Cxcl12	2.02328e-21	0.364272	0.739	0.37	4.06437e-17	ENSMUSG00000061353
Gm10222	1.03134e-18	-0.357455	0.94	0.978	2.07176e-14	ENSMUSG00000067736
Cfh	1.11096e-17	-0.220526	0.984	0.996	2.2317e-13	ENSMUSG00000026365
Col10a1	1.92362e-17	0.221704	0.233	0.045	3.86416e-13	ENSMUSG00000039462
Zfp36	2.85384e-16	0.385842	0.455	0.203	5.73279e-12	ENSMUSG00000044786
mt-Nd2	8.97166e-16	-0.238186	0.998	1	1.80223e-11	ENSMUSG00000064345
Lox	9.79507e-16	-0.186367	0.977	0.976	1.96763e-11	ENSMUSG00000024529
Ptma	4.96859e-15	-0.145327	0.982	0.983	9.9809e-11	ENSMUSG00000026238
mt-Nd4	1.13678e-14	-0.230569	0.998	1	2.28357e-10	ENSMUSG00000064363
Pdk4	4.68703e-14	0.223682	0.326	0.117	9.41531e-10	ENSMUSG00000019577
Ckap4	5.56333e-14	-0.212574	0.975	0.983	1.11756e-09	ENSMUSG00000046841
Cadm1	1.03626e-13	-0.256436	0.887	0.896	2.08164e-09	ENSMUSG00000032076
Egr1	1.70583e-13	0.388488	0.395	0.18	3.42667e-09	ENSMUSG00000038418
Ubc	1.73027e-13	0.328586	0.794	0.561	3.47577e-09	ENSMUSG00000008348
Prss34	2.66765e-13	-0.282395	0.005	0.126	5.35878e-09	ENSMUSG00000056399
Junb	2.75194e-13	0.318931	0.413	0.195	5.5281e-09	ENSMUSG00000052837
Igfbp4	4.718e-13	0.219344	0.448	0.197	9.47751e-09	ENSMUSG00000017493
mt-Cytb	7.66683e-13	-0.198296	1	1	1.54011e-08	ENSMUSG00000064370
Bgn	8.22722e-13	-0.146184	0.995	0.993	1.65268e-08	ENSMUSG00000031375
mt-Nd1	8.36653e-13	-0.201398	1	1	1.68067e-08	ENSMUSG00000064341
mt-Co1	1.26859e-12	-0.196553	1	1	2.54834e-08	ENSMUSG00000064351
Sh3bgrl	1.35983e-12	-0.332512	0.644	0.699	2.73163e-08	ENSMUSG00000031246
Fosb	2.35504e-12	0.363708	0.339	0.151	4.7308e-08	ENSMUSG00000003545
Gm28437	3.75741e-12	-0.343036	0.972	0.983	7.54789e-08	ENSMUSG00000101111
Itgb1	3.78202e-12	-0.196254	0.926	0.926	7.59733e-08	ENSMUSG00000025809
Ibsp	4.07364e-12	-0.152521	0.984	0.983	8.18313e-08	ENSMUSG00000029306
Gm10925	6.36798e-12	-0.233561	1	1	1.2792e-07	ENSMUSG00000100862
Cyr61	1.08336e-11	0.319201	0.596	0.353	2.17624e-07	ENSMUSG00000028195
mt-Co2	1.42245e-11	-0.190359	1	1	2.85743e-07	ENSMUSG00000064354
mt-Atp6	1.73681e-11	-0.196441	1	1	3.4889e-07	ENSMUSG00000064357
Calm2	2.92052e-11	-0.185382	0.864	0.825	5.86674e-07	ENSMUSG00000036438
Ctnnb1	8.14256e-11	-0.181579	0.975	0.972	1.63568e-06	ENSMUSG00000006932
Col1a2	8.34134e-11	-0.184122	1	1	1.67561e-06	ENSMUSG00000029661
Igfbp5	9.50923e-11	0.189586	0.363	0.16	1.91021e-06	ENSMUSG00000026185
Plod2	1.2841e-10	-0.188244	0.961	0.957	2.5795e-06	ENSMUSG00000032374
Dusp1	1.76792e-10	0.215207	0.217	0.074	3.5514e-06	ENSMUSG00000024190
App	2.11102e-10	-0.173357	0.97	0.954	4.24061e-06	ENSMUSG00000022892
Cpe	2.18091e-10	-0.154063	0.988	0.98	4.38102e-06	ENSMUSG00000037852
Col5a2	2.27777e-10	-0.180003	0.998	0.994	4.57558e-06	ENSMUSG00000026042
Serpinh1	2.33983e-10	-0.125037	0.993	0.991	4.70026e-06	ENSMUSG00000070436
Pacsin1	3.0108e-10	0.122415	0.217	0.071	6.04809e-06	ENSMUSG00000040276
Gm28438	3.11494e-10	-0.373368	0.972	0.972	6.2573e-06	ENSMUSG00000101939
Aes	3.1641e-10	0.250856	0.697	0.448	6.35605e-06	ENSMUSG00000054452
Sparc	3.29691e-10	-0.146412	1	1	6.62283e-06	ENSMUSG00000018593
Gm28661	3.76642e-10	-0.381678	0.998	1	7.56598e-06	ENSMUSG00000102070
Jun	4.89167e-10	0.350282	0.455	0.264	9.82638e-06	ENSMUSG00000052684
Col1a1	1.10615e-09	-0.175857	1	1	2.22202e-05	ENSMUSG00000001506
Cfl1	1.73764e-09	-0.133064	0.97	0.954	3.49056e-05	ENSMUSG00000056201
Hnrnpa2b1	2.07716e-09	-0.182386	0.855	0.838	4.1726e-05	ENSMUSG00000004980
Bmp3	3.02051e-09	-0.294715	0.674	0.732	6.0676e-05	ENSMUSG00000029335
Ip6k2	4.90485e-09	0.123424	0.275	0.117	9.85285e-05	ENSMUSG00000032599
mt-Rnr1	5.41651e-09	-0.198284	0.998	0.996	0.000108807	ENSMUSG00000064337
Cst3	5.62192e-09	-0.146038	0.986	0.989	0.000112933	ENSMUSG00000027447
Adipoq	6.66526e-09	0.15616	0.129	0.03	0.000133892	ENSMUSG00000022878
Calu	8.3171e-09	-0.150537	0.933	0.913	0.000167074	ENSMUSG00000029767
Itm2b	1.60856e-08	-0.107631	0.998	0.983	0.000323127	ENSMUSG00000022108
Gnas	1.90981e-08	-0.0875555	0.995	0.994	0.000383642	ENSMUSG00000027523
Col13a1	1.96836e-08	-0.269311	0.681	0.727	0.000395404	ENSMUSG00000058806
Selenof	2.17212e-08	-0.163558	0.896	0.883	0.000436335	ENSMUSG00000037072
mt-Co3	2.54705e-08	-0.16245	1	1	0.000511652	ENSMUSG00000064358
Gas1	3.0522e-08	0.174863	0.316	0.154	0.000613127	ENSMUSG00000052957
Lamp1	3.41173e-08	-0.208903	0.797	0.775	0.000685348	ENSMUSG00000031447
Dhrs1	5.52304e-08	0.170916	0.469	0.264	0.00110947	ENSMUSG00000002332
Lum	7.66384e-08	-0.191121	0.834	0.833	0.00153951	ENSMUSG00000036446
Gm4332	9.08512e-08	-0.288067	0.113	0.243	0.00182502	ENSMUSG00000106037
Col11a2	9.96345e-08	-0.179639	0.988	0.985	0.00200146	ENSMUSG00000024330
Tmem189	1.02048e-07	0.138941	0.33	0.165	0.00204994	ENSMUSG00000090213
Hspa5	1.28716e-07	-0.173174	0.891	0.872	0.00258565	ENSMUSG00000026864
Eif4g2	1.62786e-07	-0.137288	0.901	0.844	0.00327004	ENSMUSG00000005610
Nr4a1	1.67135e-07	0.125849	0.139	0.043	0.00335741	ENSMUSG00000023034
Gm8797	2.16807e-07	-0.256794	0.132	0.26	0.00435523	ENSMUSG00000103034
Hsp90b1	2.17836e-07	-0.168529	0.889	0.875	0.00437589	ENSMUSG00000020048
[truncated: 20,011 more rows]
