# Supplementary material for: Induction of osteogenesis by bone-targeted Notch activation
Source: eLife. 2022 Feb 4;11:e60183. doi: 10.7554/eLife.60183 (PMC8880996; doi:10.7554/eLife.60183)
Supplement: Figure 9—source data 1. [file elife-60183-fig9-data1.xlsx]

## Sheet: Summary
Figure 9-source data 1
D, G	Software	Seurat (4.0.4)
	Method	FindMarkers
	Parameters	assay='RNA'
		logfc.threshold=0.0
		test.use='wilcox'
		min.pct=0.0
		min.cells.feature=0
		min.cells.group=0
	Statistical Test	Wilcoxon Rank Sum
	Multiple testing correction	Bonferroni
	Columns
	gene_name	Gene symbol
	p_val	Wilcoxon Rank Sum P-value
	avg_log2FC	Average log2-fold change Dll4(E12) / Control
	pct.1	Fraction of cells expressing gene in Dll4(E12)
	pct.2	Fraction of cells expressing gene in control
	p_val_adj	Bonferroni adjusted P-value
	ensembl	Ensembl gene ID
	Excluded from plot	Mitochondrial genes (mt-)
		Pseudo genes (Gm*)

## Sheet: dpMSC
gene_name	p_val	avg_log2FC	pct.1	pct.2	p_val_adj	ensembl
Gm42418	9.20232e-224	-0.277803	0.982	0.997	1.84856e-219	ENSMUSG00000098178
Serpine2	4.40448e-164	-0.167363	1	1	8.84772e-160	ENSMUSG00000026249
Igfbp3	8.34469e-161	-0.652263	0.234	0.579	1.67628e-156	ENSMUSG00000020427
Mgp	4.85981e-152	-0.613439	0.522	0.793	9.76238e-148	ENSMUSG00000030218
Cxcl12	3.18305e-140	-0.122715	1	1	6.39411e-136	ENSMUSG00000061353
Col6a1	6.84565e-131	-0.266424	0.905	0.947	1.37515e-126	ENSMUSG00000001119
mt-Nd4l	5.77734e-128	-0.180912	0.995	0.994	1.16055e-123	ENSMUSG00000065947
Clu	7.51721e-126	-0.237416	0.936	0.966	1.51006e-121	ENSMUSG00000022037
Gm10222	8.69944e-125	-0.188155	0.986	0.99	1.74754e-120	ENSMUSG00000067736
Col6a2	7.20108e-120	-0.323092	0.78	0.866	1.44655e-115	ENSMUSG00000020241
mt-Nd5	7.62307e-119	-0.187469	0.988	0.989	1.53132e-114	ENSMUSG00000064367
Dhrs3	2.24877e-113	0.461812	0.695	0.335	4.51733e-109	ENSMUSG00000066026
Bmp6	2.31474e-111	-0.31103	0.773	0.849	4.64985e-107	ENSMUSG00000039004
Plpp3	2.44534e-111	-0.163201	0.996	0.993	4.91219e-107	ENSMUSG00000028517
Serping1	1.58174e-106	-0.135341	0.996	0.997	3.17741e-102	ENSMUSG00000023224
Lepr	1.28312e-105	-0.184381	0.983	0.987	2.57754e-101	ENSMUSG00000057722
Kitl	7.28239e-103	-0.162035	0.984	0.981	1.46289e-98	ENSMUSG00000019966
mt-Atp8	9.44906e-103	-0.222445	0.933	0.954	1.89813e-98	ENSMUSG00000064356
C1ra	1.04842e-98	-0.205709	0.959	0.963	2.10606e-94	ENSMUSG00000055172
Prg4	1.52037e-94	0.479485	0.384	0.116	3.05411e-90	ENSMUSG00000006014
Ptma	4.68449e-94	-0.146723	0.99	0.989	9.41021e-90	ENSMUSG00000026238
Igf2	2.6822e-92	0.455512	0.425	0.158	5.38801e-88	ENSMUSG00000048583
mt-Co1	5.04048e-91	-0.109441	1	0.999	1.01253e-86	ENSMUSG00000064351
Gm49394	1.20953e-89	0.437163	0.419	0.156	2.4297e-85	ENSMUSG00000115302
Angpt4	4.51187e-88	0.432415	0.447	0.166	9.06344e-84	ENSMUSG00000027460
Ibsp	1.2273e-87	-0.265892	0.875	0.941	2.46541e-83	ENSMUSG00000029306
Gdpd2	1.72116e-86	-0.149015	0.986	0.987	3.45747e-82	ENSMUSG00000019359
mt-Nd2	5.08048e-86	-0.11211	1	1	1.02057e-81	ENSMUSG00000064345
Ltbp2	8.14111e-84	0.390956	0.762	0.462	1.63539e-79	ENSMUSG00000002020
Angptl4	8.74576e-84	0.374212	0.472	0.178	1.75685e-79	ENSMUSG00000002289
Notch3	5.70044e-82	-0.405244	0.416	0.6	1.14511e-77	ENSMUSG00000038146
mt-Nd4	2.22078e-81	-0.105348	1	0.999	4.4611e-77	ENSMUSG00000064363
mt-Cytb	2.42166e-81	-0.102109	1	0.999	4.86464e-77	ENSMUSG00000064370
Gm28661	1.31064e-80	-0.257383	1	1	2.63281e-76	ENSMUSG00000102070
Pim3	8.64432e-79	0.338612	0.316	0.085	1.73647e-74	ENSMUSG00000035828
Runx1	5.98472e-77	-0.299514	0.693	0.781	1.20221e-72	ENSMUSG00000022952
Mdk	9.8081e-76	-0.337347	0.612	0.727	1.97025e-71	ENSMUSG00000027239
mt-Rnr1	1.98211e-75	-0.173902	0.981	0.985	3.98166e-71	ENSMUSG00000064337
Gas6	1.02683e-74	-0.117406	0.99	0.989	2.0627e-70	ENSMUSG00000031451
Emp1	1.13053e-74	0.30445	0.894	0.67	2.27101e-70	ENSMUSG00000030208
Snai2	5.68193e-74	-0.342195	0.568	0.702	1.14139e-69	ENSMUSG00000022676
Eef1a1	5.76099e-74	-0.124665	0.991	0.99	1.15727e-69	ENSMUSG00000037742
Mme	7.75893e-70	-0.215034	0.84	0.863	1.55861e-65	ENSMUSG00000027820
Nedd4	1.87382e-69	-0.113574	0.992	0.989	3.76414e-65	ENSMUSG00000032216
Sfrp1	1.31884e-65	0.356082	0.69	0.435	2.64929e-61	ENSMUSG00000031548
Prelp	4.97796e-65	-0.336445	0.608	0.741	9.99973e-61	ENSMUSG00000041577
Kctd12	2.23876e-64	-0.230105	0.787	0.827	4.49723e-60	ENSMUSG00000098557
Lgals1	3.72509e-64	0.338533	0.613	0.327	7.48296e-60	ENSMUSG00000068220
Ebf3	1.09695e-62	-0.17728	0.897	0.916	2.20355e-58	ENSMUSG00000010476
Spry1	5.90176e-62	0.304418	0.862	0.612	1.18555e-57	ENSMUSG00000037211
App	7.04522e-62	-0.0995079	0.996	0.995	1.41524e-57	ENSMUSG00000022892
Tpt1	9.87009e-61	-0.124324	0.985	0.981	1.9827e-56	ENSMUSG00000060126
Pten	5.6226e-59	-0.217044	0.809	0.839	1.12947e-54	ENSMUSG00000013663
mt-Atp6	8.51197e-59	-0.0920948	1	0.999	1.70988e-54	ENSMUSG00000064357
Gm10925	5.41179e-56	-0.0957364	1	0.999	1.08712e-51	ENSMUSG00000100862
mt-Nd1	1.38599e-53	-0.0862911	1	1	2.78417e-49	ENSMUSG00000064341
Prss34	1.28055e-52	-0.166743	0.001	0.077	2.57237e-48	ENSMUSG00000056399
St3gal6	1.75707e-52	-0.238028	0.674	0.723	3.5296e-48	ENSMUSG00000022747
Nudt4	3.46514e-52	-0.237912	0.693	0.732	6.96078e-48	ENSMUSG00000020029
Tmem176b	8.1583e-52	-0.0882334	1	0.998	1.63884e-47	ENSMUSG00000029810
Angptl1	4.01893e-51	-0.321272	0.094	0.241	8.07323e-47	ENSMUSG00000033544
B2m	9.98978e-51	-0.0778967	1	1	2.00675e-46	ENSMUSG00000060802
Il1r1	1.06933e-50	-0.32571	0.418	0.556	2.14806e-46	ENSMUSG00000026072
Picalm	2.00111e-50	-0.218017	0.709	0.751	4.01982e-46	ENSMUSG00000039361
Itm2b	6.83119e-50	-0.0892189	0.999	0.997	1.37225e-45	ENSMUSG00000022108
Tuba1c	2.10787e-49	0.294097	0.721	0.459	4.23428e-45	ENSMUSG00000043091
Ncam1	2.1865e-49	0.279721	0.311	0.125	4.39223e-45	ENSMUSG00000039542
Slc36a2	3.04187e-49	0.204104	0.179	0.038	6.1105e-45	ENSMUSG00000020264
Laptm4a	1.57619e-48	-0.0977445	0.987	0.98	3.16626e-44	ENSMUSG00000020585
Gm29216	2.16917e-48	0.0088643	0.347	0.167	4.35742e-44	ENSMUSG00000101249
Grem1	2.40004e-47	-0.214248	0.758	0.794	4.8212e-43	ENSMUSG00000074934
Itga1	2.61999e-47	-0.251081	0.634	0.698	5.26304e-43	ENSMUSG00000042284
Lamp2	9.06377e-47	-0.147851	0.861	0.861	1.82073e-42	ENSMUSG00000016534
Cst3	2.37552e-46	-0.0883525	1	0.999	4.77194e-42	ENSMUSG00000027447
Itm2c	3.33463e-46	-0.13239	0.892	0.871	6.69861e-42	ENSMUSG00000026223
Rps24	3.99514e-46	-0.148874	0.898	0.899	8.02543e-42	ENSMUSG00000025290
Olfml3	1.67919e-45	0.270625	0.832	0.617	3.37316e-41	ENSMUSG00000027848
Adipoq	3.71803e-45	0.140556	0.994	0.964	7.46878e-41	ENSMUSG00000022878
Heyl	2.08092e-44	-0.262249	0.059	0.178	4.18015e-40	ENSMUSG00000032744
mt-Co2	3.4013e-44	-0.0804892	1	1	6.83253e-40	ENSMUSG00000064354
Bgn	6.9649e-44	-0.0720585	1	0.997	1.39911e-39	ENSMUSG00000031375
Ckb	7.10541e-43	0.215422	0.27	0.102	1.42734e-38	ENSMUSG00000001270
Fbn1	5.05375e-42	-0.146443	0.879	0.877	1.0152e-37	ENSMUSG00000027204
Pappa	3.10099e-41	-0.149084	0.892	0.89	6.22926e-37	ENSMUSG00000028370
Adamts5	3.83956e-41	0.278289	0.433	0.234	7.7129e-37	ENSMUSG00000022894
Cdc42	4.98052e-41	-0.126969	0.882	0.857	1.00049e-36	ENSMUSG00000006699
mt-Rnr2	3.08245e-40	-0.117254	0.99	0.984	6.19203e-36	ENSMUSG00000064339
Col10a1	3.11297e-40	0.187141	0.151	0.033	6.25333e-36	ENSMUSG00000039462
Gm28437	1.0648e-39	-0.126167	0.984	0.987	2.13896e-35	ENSMUSG00000101111
Hspa8	2.55332e-39	-0.236319	0.769	0.813	5.12911e-35	ENSMUSG00000015656
Slc26a7	1.13101e-38	-0.195868	0.734	0.774	2.27197e-34	ENSMUSG00000040569
Ltbp1	1.75006e-38	-0.278122	0.439	0.537	3.51553e-34	ENSMUSG00000001870
Loxl2	3.26628e-38	0.24651	0.68	0.452	6.56129e-34	ENSMUSG00000034205
H3f3a	6.07348e-38	-0.122541	0.902	0.884	1.22004e-33	ENSMUSG00000060743
Plxna2	1.13014e-37	0.262391	0.635	0.42	2.27022e-33	ENSMUSG00000026640
Wisp2	1.32124e-37	-0.216815	0.753	0.828	2.6541e-33	ENSMUSG00000027656
Tmem176a	6.20982e-37	-0.0792096	0.994	0.984	1.24743e-32	ENSMUSG00000023367
Nrp1	1.10181e-36	-0.196235	0.69	0.71	2.21331e-32	ENSMUSG00000025810
Hsp90b1	3.24987e-35	-0.0812399	0.989	0.974	6.52834e-31	ENSMUSG00000020048
Rps28	7.32261e-35	-0.175103	0.857	0.849	1.47097e-30	ENSMUSG00000067288
Cyp1b1	8.01192e-35	-0.0913317	0.976	0.967	1.60943e-30	ENSMUSG00000024087
Cbfa2t3	1.87402e-34	-0.215852	0.05	0.147	3.76452e-30	ENSMUSG00000006362
Ifitm3	3.77407e-34	-0.0868665	0.992	0.985	7.58135e-30	ENSMUSG00000025492
Epas1	6.58756e-34	-0.11561	0.922	0.908	1.32331e-29	ENSMUSG00000024140
Atp2b4	1.76331e-33	-0.257447	0.117	0.235	3.54214e-29	ENSMUSG00000026463
Sdc4	2.12967e-33	0.21917	0.396	0.215	4.27809e-29	ENSMUSG00000017009
Col1a1	1.10393e-32	-0.215705	0.725	0.753	2.21758e-28	ENSMUSG00000001506
Igfbp5	2.28497e-32	-0.114594	0.99	0.996	4.59005e-28	ENSMUSG00000026185
mt-Co3	3.19148e-32	-0.0864259	0.999	0.998	6.41105e-28	ENSMUSG00000064358
Atn1	5.02938e-32	-0.203044	0.629	0.67	1.0103e-27	ENSMUSG00000004263
C6	2.6097e-31	0.241437	0.715	0.516	5.24236e-27	ENSMUSG00000022181
Comp	3.90217e-31	0.226882	0.181	0.066	7.83868e-27	ENSMUSG00000031849
Sulf1	4.65545e-31	-0.276796	0.385	0.48	9.35187e-27	ENSMUSG00000016918
Tnfrsf19	1.12666e-30	0.230766	0.625	0.414	2.26324e-26	ENSMUSG00000060548
Prrx1	1.28328e-30	-0.22106	0.552	0.597	2.57786e-26	ENSMUSG00000026586
Scara3	1.51686e-30	-0.185014	0.657	0.68	3.04707e-26	ENSMUSG00000034463
H2-Q6	3.07552e-30	0.20778	0.616	0.413	6.1781e-26	ENSMUSG00000073409
S100a11	3.89592e-30	-0.0827182	0.982	0.971	7.82612e-26	ENSMUSG00000027907
Tmem2	4.04943e-30	0.21261	0.382	0.212	8.1345e-26	ENSMUSG00000024754
Fth1	6.73623e-30	-0.0730022	0.996	0.997	1.35317e-25	ENSMUSG00000024661
Rpl4	1.28232e-29	-0.173583	0.7	0.719	2.57593e-25	ENSMUSG00000032399
Rps29	1.31765e-29	-0.10326	0.958	0.937	2.64689e-25	ENSMUSG00000034892
Sod3	1.87239e-29	0.215889	0.497	0.301	3.76125e-25	ENSMUSG00000072941
Lamp1	3.29978e-29	-0.109214	0.855	0.83	6.6286e-25	ENSMUSG00000031447
Nptn	4.52406e-29	-0.114199	0.861	0.841	9.08793e-25	ENSMUSG00000032336
Ehd3	5.87778e-29	0.216606	0.57	0.364	1.18073e-24	ENSMUSG00000024065
Rbm39	2.3094e-28	-0.189618	0.613	0.656	4.63911e-24	ENSMUSG00000027620
Lmo4	2.52111e-28	0.200382	0.845	0.66	5.0644e-24	ENSMUSG00000028266
Rps8	2.52524e-28	-0.103926	0.964	0.951	5.07271e-24	ENSMUSG00000047675
Thbs1	3.85873e-28	0.201858	0.427	0.249	7.75142e-24	ENSMUSG00000040152
Zfp36l1	4.12551e-28	-0.138435	0.858	0.851	8.28733e-24	ENSMUSG00000021127
Rpl5	6.74518e-28	-0.133763	0.861	0.847	1.35497e-23	ENSMUSG00000058558
Hnrnpa2b1	7.23056e-28	-0.0915818	0.904	0.866	1.45248e-23	ENSMUSG00000004980
Apod	7.84748e-28	-0.267013	0.35	0.462	1.5764e-23	ENSMUSG00000022548
Chrdl1	7.96403e-28	-0.0780677	0.98	0.967	1.59981e-23	ENSMUSG00000031283
H2-D1	1.52417e-27	-0.0537796	1	1	3.06174e-23	ENSMUSG00000073411
Rassf2	1.66418e-27	0.123114	0.095	0.018	3.343e-23	ENSMUSG00000027339
Cadm1	1.943e-27	0.141962	0.119	0.032	3.90311e-23	ENSMUSG00000032076
Eid1	4.56295e-27	-0.192257	0.594	0.627	9.16605e-23	ENSMUSG00000091337
Id3	4.57005e-27	-0.202212	0.665	0.696	9.18032e-23	ENSMUSG00000007872
Lox	6.16348e-27	-0.151244	0.786	0.781	1.23812e-22	ENSMUSG00000024529
Map1b	9.07217e-27	0.186575	0.309	0.162	1.82242e-22	ENSMUSG00000052727
Dapk2	1.7512e-26	0.132688	0.132	0.04	3.51782e-22	ENSMUSG00000032380
Pgd	3.85113e-26	0.186964	0.439	0.264	7.73615e-22	ENSMUSG00000028961
Cxcl14	4.18612e-26	0.0866727	0.999	0.986	8.40907e-22	ENSMUSG00000021508
Gnas	1.01573e-25	-0.0606078	0.996	0.983	2.0404e-21	ENSMUSG00000027523
Rpl39	1.23671e-25	-0.103862	0.893	0.87	2.48429e-21	ENSMUSG00000079641
Marcks	1.65262e-25	-0.0605748	0.988	0.971	3.31978e-21	ENSMUSG00000069662
Id4	4.0656e-25	-0.208941	0.542	0.592	8.16698e-21	ENSMUSG00000021379
Mt2	4.07026e-25	0.216308	0.507	0.337	8.17635e-21	ENSMUSG00000031762
Net1	6.68076e-25	0.167059	0.321	0.174	1.34203e-20	ENSMUSG00000021215
C5ar2	7.84864e-25	0.11978	0.093	0.02	1.57663e-20	ENSMUSG00000074361
Thsd4	1.3032e-24	0.208153	0.382	0.233	2.61786e-20	ENSMUSG00000032289
Ednra	1.44082e-24	-0.249437	0.186	0.285	2.89432e-20	ENSMUSG00000031616
Ddx5	1.54318e-24	-0.0968383	0.871	0.84	3.09994e-20	ENSMUSG00000020719
Bmp4	2.15996e-24	0.208237	0.674	0.491	4.33892e-20	ENSMUSG00000021835
Htra3	2.62256e-24	0.152945	0.241	0.118	5.26819e-20	ENSMUSG00000029096
Serpina3f	3.11064e-24	-0.26048	0.271	0.372	6.24865e-20	ENSMUSG00000066363
Serpina3n	3.71084e-24	-0.222533	0.575	0.646	7.45433e-20	ENSMUSG00000021091
Serinc3	6.79372e-24	-0.0885584	0.924	0.901	1.36472e-19	ENSMUSG00000017707
Cyr61	1.13566e-23	0.171281	0.344	0.196	2.28131e-19	ENSMUSG00000028195
Serpina12	1.22927e-23	0.185984	0.361	0.213	2.46936e-19	ENSMUSG00000041567
Rsrp1	1.35569e-23	-0.200612	0.507	0.566	2.72331e-19	ENSMUSG00000037266
Gm15500	1.59138e-23	-0.130652	0.822	0.815	3.19677e-19	ENSMUSG00000086583
Eya2	1.75786e-23	0.15371	0.313	0.171	3.5312e-19	ENSMUSG00000017897
Axl	3.1467e-23	0.165696	0.335	0.189	6.32109e-19	ENSMUSG00000002602
Scp2	3.93169e-23	0.171667	0.723	0.547	7.89798e-19	ENSMUSG00000028603
Errfi1	4.76051e-23	0.182501	0.475	0.299	9.56292e-19	ENSMUSG00000028967
Wdr1	5.13177e-23	0.191264	0.616	0.413	1.03087e-18	ENSMUSG00000005103
Phgdh	1.01886e-22	0.111823	0.107	0.031	2.04669e-18	ENSMUSG00000053398
Cnbp	1.39252e-22	-0.104404	0.831	0.804	2.79729e-18	ENSMUSG00000030057
Mrc2	2.34329e-22	0.138134	0.222	0.108	4.70719e-18	ENSMUSG00000020695
Itm2a	2.6265e-22	-0.200753	0.545	0.588	5.27612e-18	ENSMUSG00000031239
Fzd1	3.3029e-22	0.189394	0.576	0.39	6.63486e-18	ENSMUSG00000044674
Tpbg	7.73157e-22	0.140034	0.216	0.105	1.55312e-17	ENSMUSG00000035274
Zeb2	8.27915e-22	-0.123132	0.742	0.721	1.66311e-17	ENSMUSG00000026872
Olfml2b	1.35678e-21	-0.130784	0.765	0.752	2.72551e-17	ENSMUSG00000038463
Sfrp2	1.39727e-21	0.138554	0.131	0.049	2.80683e-17	ENSMUSG00000027996
Fndc3b	1.5484e-21	-0.14409	0.696	0.695	3.11043e-17	ENSMUSG00000039286
Sulf2	1.88257e-21	0.0934893	0.062	0.008	3.7817e-17	ENSMUSG00000006800
Cald1	2.01522e-21	-0.0731254	0.92	0.88	4.04817e-17	ENSMUSG00000029761
Ak3	2.76864e-21	-0.0962755	0.859	0.837	5.56165e-17	ENSMUSG00000024782
Eif1	3.86116e-21	-0.112989	0.869	0.852	7.7563e-17	ENSMUSG00000035530
Rps4x	4.1338e-21	-0.131112	0.826	0.809	8.30397e-17	ENSMUSG00000031320
Ldha	7.40029e-21	0.162042	0.443	0.276	1.48657e-16	ENSMUSG00000063229
Hsp90ab1	7.60739e-21	-0.0612014	0.95	0.912	1.52817e-16	ENSMUSG00000023944
Rbp4	9.90517e-21	0.104614	0.107	0.034	1.98975e-16	ENSMUSG00000024990
Glis2	1.60427e-20	0.141005	0.271	0.148	3.22265e-16	ENSMUSG00000014303
Qpct	1.65434e-20	0.1115	0.159	0.068	3.32323e-16	ENSMUSG00000024084
Aqp7	1.8751e-20	0.0967013	0.092	0.025	3.7667e-16	ENSMUSG00000028427
S1pr1	2.02863e-20	0.169855	0.495	0.32	4.07511e-16	ENSMUSG00000045092
Plac9a	2.12158e-20	-0.111255	0.911	0.923	4.26183e-16	ENSMUSG00000095304
Fbln5	2.33038e-20	-0.0596204	0.988	0.976	4.68127e-16	ENSMUSG00000021186
2001-03-01	2.40942e-20	0.162836	0.464	0.292	4.84004e-16	ENSMUSG00000026621
Ctgf	2.49348e-20	0.184705	0.569	0.398	5.0089e-16	ENSMUSG00000019997
Dnajc3	4.72077e-20	-0.109806	0.765	0.74	9.48309e-16	ENSMUSG00000022136
Ldb2	5.52633e-20	-0.140978	0.042	0.107	1.11013e-15	ENSMUSG00000039706
Pdgfa	6.05112e-20	0.154136	0.388	0.238	1.21555e-15	ENSMUSG00000025856
Bcat1	6.27898e-20	0.127528	0.192	0.092	1.26132e-15	ENSMUSG00000030268
Gpx3	1.36052e-19	-0.0633457	0.998	0.993	2.73302e-15	ENSMUSG00000018339
Slc5a3	1.45644e-19	0.185343	0.626	0.447	2.92571e-15	ENSMUSG00000089774
C1s1	1.51035e-19	-0.103221	0.826	0.793	3.034e-15	ENSMUSG00000038521
2008-09-01	2.51857e-19	-0.123464	0.703	0.689	5.05929e-15	ENSMUSG00000018398
Col4a2	2.88934e-19	0.171089	0.818	0.631	5.8041e-15	ENSMUSG00000031503
Col1a2	3.19097e-19	-0.0490097	1	1	6.41001e-15	ENSMUSG00000029661
Rps3a1	3.4343e-19	-0.113892	0.867	0.839	6.89882e-15	ENSMUSG00000028081
Rbms1	5.75373e-19	-0.0807224	0.894	0.86	1.15581e-14	ENSMUSG00000026970
Antxr1	6.26923e-19	-0.106824	0.789	0.765	1.25936e-14	ENSMUSG00000033420
Pdk4	6.57283e-19	0.125414	0.231	0.122	1.32035e-14	ENSMUSG00000019577
Vcam1	8.18551e-19	-0.0593962	0.986	0.973	1.6443e-14	ENSMUSG00000027962
Ebp	8.48765e-19	0.126441	0.315	0.181	1.705e-14	ENSMUSG00000031168
Gm9780	9.00767e-19	-0.106887	0.906	0.914	1.80946e-14	ENSMUSG00000094800
Fndc1	1.11332e-18	0.124686	0.139	0.059	2.23644e-14	ENSMUSG00000071984
Slc22a3	1.43345e-18	0.0869725	0.085	0.024	2.87952e-14	ENSMUSG00000023828
Eif4g2	1.6512e-18	-0.109211	0.738	0.716	3.31694e-14	ENSMUSG00000005610
Ogn	2.00094e-18	-0.089703	0.882	0.846	4.01948e-14	ENSMUSG00000021390
Ctnnbip1	2.75117e-18	0.125409	0.245	0.134	5.52655e-14	ENSMUSG00000028988
Cldn10	2.94807e-18	-0.200662	0.419	0.48	5.92209e-14	ENSMUSG00000022132
Ifitm1	2.99924e-18	-0.168122	0.068	0.138	6.02486e-14	ENSMUSG00000025491
Adamts9	4.20238e-18	0.113514	0.207	0.106	8.44174e-14	ENSMUSG00000030022
Ywhab	4.46459e-18	-0.0628405	0.899	0.857	8.96848e-14	ENSMUSG00000018326
Gm15459	5.74687e-18	-0.188048	0.482	0.537	1.15443e-13	ENSMUSG00000100801
Sdc2	5.83189e-18	-0.119252	0.725	0.707	1.17151e-13	ENSMUSG00000022261
Rps9	5.94357e-18	-0.0927195	0.902	0.873	1.19395e-13	ENSMUSG00000006333
Gm4332	9.40432e-18	-0.2041	0.357	0.448	1.88914e-13	ENSMUSG00000106037
Txnip	9.41655e-18	0.170751	0.679	0.493	1.8916e-13	ENSMUSG00000038393
Thbs2	1.23376e-17	0.12934	0.272	0.157	2.47837e-13	ENSMUSG00000023885
Fads1	1.27002e-17	0.138446	0.388	0.242	2.55122e-13	ENSMUSG00000010663
Gm28438	1.439e-17	-0.0955087	0.973	0.985	2.89067e-13	ENSMUSG00000101939
Rps3	1.51558e-17	-0.104172	0.763	0.744	3.0445e-13	ENSMUSG00000030744
Fkbp9	1.6657e-17	-0.124504	0.679	0.67	3.34606e-13	ENSMUSG00000029781
Sema5a	1.73482e-17	0.159522	0.603	0.421	3.48491e-13	ENSMUSG00000022231
Cstb	1.81308e-17	0.168963	0.699	0.519	3.64211e-13	ENSMUSG00000005054
Enpp5	1.90349e-17	0.148434	0.471	0.309	3.82372e-13	ENSMUSG00000023960
Pros1	2.08658e-17	-0.136661	0.667	0.656	4.19153e-13	ENSMUSG00000022912
Insig1	2.22194e-17	0.109092	0.16	0.076	4.46343e-13	ENSMUSG00000045294
Psap	2.29607e-17	-0.0479023	0.991	0.969	4.61235e-13	ENSMUSG00000004207
Sfpq	3.13764e-17	-0.201308	0.405	0.46	6.3029e-13	ENSMUSG00000028820
Gnao1	3.81982e-17	0.137724	0.424	0.272	7.67326e-13	ENSMUSG00000031748
Rpl23	3.85602e-17	-0.0897808	0.894	0.865	7.74597e-13	ENSMUSG00000071415
Pdzrn4	5.13631e-17	0.126217	0.285	0.168	1.03178e-12	ENSMUSG00000036218
Sort1	7.26456e-17	0.103647	0.195	0.101	1.4593e-12	ENSMUSG00000068747
Colec12	8.10705e-17	-0.0709035	0.891	0.855	1.62854e-12	ENSMUSG00000036103
Tgm2	8.61688e-17	0.157061	0.52	0.356	1.73096e-12	ENSMUSG00000037820
Olfml2a	8.71226e-17	0.155584	0.563	0.382	1.75012e-12	ENSMUSG00000046618
Chl1	9.96356e-17	-0.219667	0.238	0.314	2.00148e-12	ENSMUSG00000030077
Il7	1.03111e-16	0.142242	0.461	0.303	2.0713e-12	ENSMUSG00000040329
Bst2	1.22713e-16	0.145109	0.413	0.269	2.46505e-12	ENSMUSG00000046718
Sfr1	1.30754e-16	-0.143526	0.618	0.614	2.62659e-12	ENSMUSG00000025066
St3gal1	1.36738e-16	-0.202382	0.384	0.438	2.74679e-12	ENSMUSG00000013846
Tnfrsf21	1.59559e-16	-0.213774	0.248	0.32	3.20522e-12	ENSMUSG00000023915
Grina	1.71793e-16	0.11425	0.295	0.172	3.45098e-12	ENSMUSG00000022564
Scd1	1.83894e-16	0.143054	0.279	0.168	3.69407e-12	ENSMUSG00000037071
Ak1	1.93076e-16	0.135374	0.386	0.247	3.87852e-12	ENSMUSG00000026817
Glul	2.96188e-16	-0.124752	0.714	0.703	5.94983e-12	ENSMUSG00000026473
Sun2	3.35141e-16	0.137445	0.443	0.291	6.73231e-12	ENSMUSG00000042524
H2-T22	4.37513e-16	0.119999	0.383	0.246	8.78877e-12	ENSMUSG00000056116
Dbi	5.37329e-16	0.150643	0.554	0.385	1.07939e-11	ENSMUSG00000026385
Morf4l1	5.81335e-16	-0.0495967	0.953	0.912	1.16779e-11	ENSMUSG00000062270
Cpt1a	6.39628e-16	0.114156	0.252	0.146	1.28488e-11	ENSMUSG00000024900
Clip2	7.44545e-16	0.0951968	0.2	0.106	1.49564e-11	ENSMUSG00000063146
Adam12	9.50338e-16	-0.162914	0.079	0.145	1.90904e-11	ENSMUSG00000054555
Rgs5	1.14896e-15	-0.135541	0.03	0.08	2.30804e-11	ENSMUSG00000026678
Bicc1	1.68396e-15	-0.111197	0.703	0.679	3.38275e-11	ENSMUSG00000014329
Map1lc3a	1.73555e-15	0.147147	0.553	0.384	3.48638e-11	ENSMUSG00000027602
Agpat3	1.7475e-15	0.115374	0.318	0.196	3.51039e-11	ENSMUSG00000001211
Hmgb1	1.98378e-15	-0.153093	0.736	0.748	3.98502e-11	ENSMUSG00000066551
2002-09-01	2.11563e-15	-0.114828	0.659	0.644	4.24987e-11	ENSMUSG00000026276
Myl9	2.30702e-15	0.133976	0.427	0.281	4.63434e-11	ENSMUSG00000067818
Pgm2	2.41443e-15	0.098229	0.172	0.088	4.8501e-11	ENSMUSG00000025791
Chpf	2.58835e-15	0.0975118	0.188	0.099	5.19947e-11	ENSMUSG00000032997
Nupr1	2.82623e-15	0.1635	0.675	0.506	5.67733e-11	ENSMUSG00000030717
Npm1	3.45821e-15	-0.161841	0.583	0.592	6.94686e-11	ENSMUSG00000057113
Mmd	3.54026e-15	0.110968	0.263	0.156	7.11168e-11	ENSMUSG00000003948
Pla2g15	4.05011e-15	0.0996524	0.146	0.071	8.13587e-11	ENSMUSG00000031903
Rmnd1	5.73299e-15	0.136433	0.269	0.169	1.15164e-10	ENSMUSG00000019763
Msrb1	6.74165e-15	0.0967064	0.18	0.095	1.35426e-10	ENSMUSG00000075705
P2rx2	7.07867e-15	0.115442	0.25	0.149	1.42196e-10	ENSMUSG00000029503
Gm13341	8.3265e-15	0.0826047	0.118	0.051	1.67263e-10	ENSMUSG00000083863
Trabd2b	8.8321e-15	0.106401	0.253	0.149	1.77419e-10	ENSMUSG00000070867
Actg1	8.97678e-15	0.0974156	0.984	0.923	1.80326e-10	ENSMUSG00000062825
S100b	9.97774e-15	0.133739	0.332	0.215	2.00433e-10	ENSMUSG00000033208
Sh3bgrl	1.06717e-14	-0.124121	0.634	0.623	2.14374e-10	ENSMUSG00000031246
Dapk1	1.18477e-14	0.146304	0.519	0.366	2.37996e-10	ENSMUSG00000021559
Apoe	1.26844e-14	-0.0541874	0.992	0.989	2.54805e-10	ENSMUSG00000002985
Col2a1	1.30097e-14	0.131871	0.442	0.293	2.61338e-10	ENSMUSG00000022483
Fzd4	1.41647e-14	0.113992	0.234	0.137	2.8454e-10	ENSMUSG00000049791
Slco2a1	1.42564e-14	0.0778369	0.079	0.027	2.86383e-10	ENSMUSG00000032548
Fn1	1.53571e-14	0.0908692	0.112	0.048	3.08494e-10	ENSMUSG00000026193
Rerg	1.57614e-14	0.0719294	0.074	0.024	3.16614e-10	ENSMUSG00000030222
Tap1	1.71063e-14	0.107141	0.259	0.155	3.43631e-10	ENSMUSG00000037321
Fam46a	1.73186e-14	-0.174445	0.519	0.554	3.47896e-10	ENSMUSG00000032265
Ildr2	1.73963e-14	-0.182122	0.148	0.22	3.49456e-10	ENSMUSG00000040612
Rps26	1.74882e-14	-0.0734932	0.913	0.879	3.51303e-10	ENSMUSG00000025362
Sdc3	1.7515e-14	0.104846	0.26	0.155	3.5184e-10	ENSMUSG00000025743
Ptgis	1.77661e-14	0.0920741	0.115	0.051	3.56886e-10	ENSMUSG00000017969
52274	2.19572e-14	-0.112263	0.648	0.631	4.41076e-10	NA
Car2	2.60156e-14	-0.130899	0.047	0.101	5.226e-10	ENSMUSG00000027562
Nrcam	3.58948e-14	0.0810773	0.095	0.037	7.21055e-10	ENSMUSG00000020598
Emb	4.21734e-14	0.146266	0.636	0.468	8.4718e-10	ENSMUSG00000021728
Foxc1	4.6992e-14	-0.0607441	0.936	0.9	9.43976e-10	ENSMUSG00000050295
Vcl	4.90647e-14	0.128201	0.509	0.351	9.85612e-10	ENSMUSG00000021823
Sema6d	4.93768e-14	-0.198419	0.278	0.342	9.91881e-10	ENSMUSG00000027200
Limch1	5.02207e-14	0.148206	0.535	0.383	1.00883e-09	ENSMUSG00000037736
Oat	5.07685e-14	-0.0992359	0.729	0.703	1.01984e-09	ENSMUSG00000030934
Acaa2	5.08115e-14	0.0731214	0.085	0.031	1.0207e-09	ENSMUSG00000036880
Ankrd29	5.43014e-14	-0.119099	0.05	0.105	1.09081e-09	ENSMUSG00000057766
Dag1	5.46282e-14	-0.0705584	0.831	0.787	1.09737e-09	ENSMUSG00000039952
Enpp1	7.81969e-14	-0.191541	0.212	0.284	1.57082e-09	ENSMUSG00000037370
Cdh2	8.85079e-14	-0.100973	0.713	0.698	1.77795e-09	ENSMUSG00000024304
Fscn1	8.95951e-14	0.133357	0.535	0.373	1.79979e-09	ENSMUSG00000029581
Irak2	9.68894e-14	0.0794815	0.151	0.076	1.94632e-09	ENSMUSG00000060477
Ermp1	1.01618e-13	0.121283	0.359	0.239	2.04131e-09	ENSMUSG00000046324
Tpcn1	1.15426e-13	0.091604	0.167	0.089	2.31867e-09	ENSMUSG00000032741
Slc48a1	1.34831e-13	0.0944269	0.259	0.157	2.70849e-09	ENSMUSG00000081534
Il6ra	1.37331e-13	0.054795	0.046	0.009	2.7587e-09	ENSMUSG00000027947
Nid1	1.47637e-13	-0.0978595	0.775	0.747	2.96573e-09	ENSMUSG00000005397
Cavin2	1.50452e-13	0.0882344	0.108	0.048	3.02227e-09	ENSMUSG00000045954
Bnip3	1.55148e-13	0.0971966	0.228	0.134	3.11662e-09	ENSMUSG00000078566
Tmsb4x	1.64822e-13	-0.0428473	1	0.999	3.31093e-09	ENSMUSG00000049775
Ebf1	1.69478e-13	-0.0805385	0.824	0.787	3.40447e-09	ENSMUSG00000057098
Gpr176	1.75629e-13	0.100339	0.277	0.172	3.52803e-09	ENSMUSG00000040133
Lamtor4	1.86459e-13	0.095413	0.253	0.154	3.74559e-09	ENSMUSG00000050552
Ddx17	2.39444e-13	-0.116318	0.66	0.641	4.80995e-09	ENSMUSG00000055065
Igfbp7	2.52463e-13	-0.0376888	1	1	5.07148e-09	ENSMUSG00000036256
Sh3bp4	3.08631e-13	0.0740846	0.117	0.054	6.19978e-09	ENSMUSG00000036206
Sp7	3.11658e-13	0.0967672	0.243	0.147	6.26058e-09	ENSMUSG00000060284
Colec11	3.59461e-13	-0.100602	0.031	0.075	7.22086e-09	ENSMUSG00000036655
1500015O10Rik	3.60493e-13	0.101432	0.237	0.143	7.24158e-09	ENSMUSG00000026051
Por	3.65023e-13	0.0769767	0.141	0.071	7.33259e-09	ENSMUSG00000005514
Prkcd	3.67386e-13	0.0845472	0.163	0.087	7.38004e-09	ENSMUSG00000021948
Lama1	3.67953e-13	0.0643712	0.08	0.029	7.39145e-09	ENSMUSG00000032796
Gstm1	3.68193e-13	-0.103398	0.716	0.69	7.39625e-09	ENSMUSG00000058135
Tacc2	4.10525e-13	0.0676141	0.09	0.036	8.24662e-09	ENSMUSG00000030852
Rhoc	4.12198e-13	0.123182	0.475	0.324	8.28023e-09	ENSMUSG00000002233
Mmp13	4.18307e-13	-0.216855	0.44	0.503	8.40296e-09	ENSMUSG00000050578
Rps5	4.25611e-13	-0.0661355	0.854	0.803	8.54968e-09	ENSMUSG00000012848
Fmo2	4.37343e-13	-0.166856	0.5	0.544	8.78535e-09	ENSMUSG00000040170
Pitpnm2	4.93808e-13	0.0542757	0.057	0.016	9.91962e-09	ENSMUSG00000029406
Plp2	5.09369e-13	0.0865216	0.281	0.181	1.02322e-08	ENSMUSG00000031146
Arf1	5.43824e-13	-0.0488775	0.93	0.886	1.09243e-08	ENSMUSG00000048076
Mcpt8	5.50445e-13	-0.044429	0.001	0.02	1.10573e-08	ENSMUSG00000022157
Il17d	5.50967e-13	0.0883258	0.234	0.14	1.10678e-08	ENSMUSG00000050222
Tmem37	5.64252e-13	0.0839672	0.138	0.07	1.13347e-08	ENSMUSG00000050777
Rcn1	6.42422e-13	-0.151498	0.487	0.506	1.2905e-08	ENSMUSG00000005973
Adamts2	6.717e-13	-0.0456794	0.914	0.854	1.34931e-08	ENSMUSG00000036545
Slco1a5	9.56235e-13	-0.144831	0.083	0.142	1.92088e-08	ENSMUSG00000063975
Fabp4	1.07059e-12	0.10446	0.091	0.038	2.1506e-08	ENSMUSG00000062515
Mki67	1.0827e-12	-0.0549358	0.004	0.027	2.17492e-08	ENSMUSG00000031004
H3f3c	1.25694e-12	-0.0480935	0.032	0.075	2.52495e-08	ENSMUSG00000082029
Ttyh2	1.36556e-12	0.0741319	0.112	0.052	2.74314e-08	ENSMUSG00000034714
Cdc42ep3	1.38246e-12	0.119127	0.458	0.317	2.77708e-08	ENSMUSG00000036533
Rplp1	1.67578e-12	-0.0813891	0.86	0.814	3.36631e-08	ENSMUSG00000007892
Maob	1.84786e-12	-0.189182	0.25	0.309	3.71199e-08	ENSMUSG00000040147
2007-09-01	1.8574e-12	-0.0889516	0.729	0.686	3.73114e-08	ENSMUSG00000001833
Adarb1	1.87501e-12	0.0868652	0.208	0.122	3.76652e-08	ENSMUSG00000020262
Porcn	1.96713e-12	0.0866611	0.233	0.142	3.95157e-08	ENSMUSG00000031169
Fbxo32	1.9787e-12	0.0734996	0.138	0.071	3.97482e-08	ENSMUSG00000022358
6820431F20Rik	2.13162e-12	-0.136481	0.56	0.561	4.282e-08	ENSMUSG00000071796
Rps11	2.15725e-12	-0.105155	0.719	0.69	4.33349e-08	ENSMUSG00000003429
Selenop	2.17673e-12	-0.0426148	0.999	1	4.37263e-08	ENSMUSG00000064373
Tmem140	2.25557e-12	0.108923	0.356	0.238	4.531e-08	ENSMUSG00000057137
Rftn1	2.35567e-12	0.124467	0.535	0.381	4.73206e-08	ENSMUSG00000039316
Hacd2	2.4559e-12	0.0981366	0.4	0.278	4.9334e-08	ENSMUSG00000035376
Glrx	2.60343e-12	0.10898	0.362	0.242	5.22977e-08	ENSMUSG00000021591
Derl2	2.70634e-12	0.10362	0.349	0.231	5.4365e-08	ENSMUSG00000018442
Mt1	2.83221e-12	0.122897	0.49	0.35	5.68933e-08	ENSMUSG00000031765
Pcsk5	2.898e-12	0.0914045	0.206	0.122	5.82151e-08	ENSMUSG00000024713
Galnt2	2.92268e-12	0.0702762	0.345	0.227	5.87107e-08	ENSMUSG00000089704
H2-T23	2.96431e-12	0.115922	0.635	0.49	5.9547e-08	ENSMUSG00000067212
5430419D17Rik	3.24172e-12	0.0603836	0.051	0.014	6.51196e-08	ENSMUSG00000006204
Man1c1	3.32803e-12	0.099575	0.241	0.151	6.68534e-08	ENSMUSG00000037306
Col9a1	3.37163e-12	0.0758601	0.113	0.054	6.77294e-08	ENSMUSG00000026147
Slc8b1	3.61422e-12	0.0644939	0.09	0.038	7.26025e-08	ENSMUSG00000032754
Ptprd	3.68231e-12	-0.0731492	0.833	0.797	7.39702e-08	ENSMUSG00000028399
Lrp1	4.88005e-12	0.125958	0.584	0.419	9.80304e-08	ENSMUSG00000040249
Ncor2	4.893e-12	0.0863095	0.228	0.139	9.82905e-08	ENSMUSG00000029478
Cpne2	5.26477e-12	0.084087	0.166	0.093	1.05759e-07	ENSMUSG00000034361
Vim	5.50836e-12	-0.0500572	0.939	0.9	1.10652e-07	ENSMUSG00000026728
2310022B05Rik	5.69781e-12	0.127538	0.573	0.41	1.14458e-07	ENSMUSG00000031983
Efemp2	6.11973e-12	0.1133	0.482	0.34	1.22933e-07	ENSMUSG00000024909
Atp5l	6.3416e-12	0.0917808	0.704	0.569	1.2739e-07	ENSMUSG00000038717
Trp53inp2	6.4829e-12	0.0875338	0.292	0.186	1.30228e-07	ENSMUSG00000038375
Rapgef3	6.50212e-12	0.0691413	0.109	0.052	1.30615e-07	ENSMUSG00000022469
Csad	7.09147e-12	0.0903716	0.251	0.157	1.42453e-07	ENSMUSG00000023044
Gm20388	7.6141e-12	0.0677974	0.343	0.227	1.52952e-07	ENSMUSG00000092329
Lpl	8.63451e-12	-0.0518075	0.997	0.999	1.7345e-07	ENSMUSG00000015568
Cat	8.71384e-12	0.0908874	0.328	0.214	1.75044e-07	ENSMUSG00000027187
Prg2	9.05786e-12	-0.0348664	0	0.015	1.81954e-07	ENSMUSG00000027073
Ddit4l	9.12967e-12	-0.171117	0.196	0.263	1.83397e-07	ENSMUSG00000046818
Cd302	9.45062e-12	-0.0424516	0.933	0.882	1.89844e-07	ENSMUSG00000060703
Furin	9.49086e-12	0.0839943	0.298	0.198	1.90652e-07	ENSMUSG00000030530
Echdc2	9.86251e-12	0.079945	0.11	0.053	1.98118e-07	ENSMUSG00000028601
Mc5r	1.03208e-11	0.099504	0.213	0.131	2.07325e-07	ENSMUSG00000007480
Abcc9	1.06852e-11	-0.172398	0.15	0.213	2.14644e-07	ENSMUSG00000030249
Spg21	1.54218e-11	0.0820232	0.246	0.154	3.09794e-07	ENSMUSG00000032388
Camkk2	1.60171e-11	0.0917331	0.257	0.164	3.21752e-07	ENSMUSG00000029471
Sat1	1.66175e-11	0.118652	0.466	0.33	3.33812e-07	ENSMUSG00000025283
Cobl	1.67631e-11	-0.0603291	0.011	0.04	3.36738e-07	ENSMUSG00000020173
Dok1	1.70103e-11	0.0724389	0.123	0.063	3.41702e-07	ENSMUSG00000068335
Snta1	1.76356e-11	0.0709381	0.185	0.107	3.54263e-07	ENSMUSG00000027488
Hacd1	1.76781e-11	0.0843905	0.313	0.21	3.55118e-07	ENSMUSG00000063275
Rpl23a	1.82056e-11	-0.122118	0.874	0.855	3.65714e-07	ENSMUSG00000058546
Gm2000	1.87317e-11	-0.161053	0.391	0.45	3.76283e-07	ENSMUSG00000078193
Cbln1	1.95369e-11	-0.180835	0.444	0.497	3.92458e-07	ENSMUSG00000031654
Adamtsl1	2.0294e-11	0.0670668	0.073	0.029	4.07666e-07	ENSMUSG00000066113
Dynlt1b	2.08947e-11	0.0653283	0.42	0.306	4.19733e-07	ENSMUSG00000096255
2009-09-01	2.51661e-11	0.0731186	0.129	0.068	5.05537e-07	ENSMUSG00000059248
Atp6v1c2	2.55979e-11	0.0963248	0.264	0.171	5.14211e-07	ENSMUSG00000020566
Ldlrap1	2.67468e-11	0.087629	0.264	0.169	5.3729e-07	ENSMUSG00000037295
Canx	2.81127e-11	-0.063826	0.77	0.713	5.64729e-07	ENSMUSG00000020368
Gm1821	2.82127e-11	-0.173007	0.539	0.609	5.66736e-07	ENSMUSG00000044285
Mxd4	2.83535e-11	0.120447	0.867	0.74	5.69566e-07	ENSMUSG00000037235
Tmed10	3.25096e-11	-0.0826127	0.747	0.701	6.53053e-07	ENSMUSG00000021248
Abcd2	3.95357e-11	0.0670906	0.159	0.089	7.94192e-07	ENSMUSG00000055782
Mro	4.032e-11	0.0737672	0.188	0.111	8.09948e-07	ENSMUSG00000064036
Lgr4	4.37649e-11	0.0737479	0.151	0.084	8.7915e-07	ENSMUSG00000050199
Slc1a5	5.04838e-11	0.133681	0.865	0.71	1.01412e-06	ENSMUSG00000001918
Psmb2	5.13158e-11	0.0979362	0.425	0.295	1.03083e-06	ENSMUSG00000028837
Agt	5.19081e-11	-0.0767268	0.769	0.727	1.04273e-06	ENSMUSG00000031980
Nnmt	5.44896e-11	0.0824263	0.289	0.189	1.09459e-06	ENSMUSG00000032271
Necap2	5.52545e-11	0.0966773	0.398	0.272	1.10995e-06	ENSMUSG00000028923
AC121965.1	5.70322e-11	0.101119	0.441	0.308	1.14566e-06	ENSMUSG00000113902
Camk2n1	5.80892e-11	0.132921	0.675	0.509	1.1669e-06	ENSMUSG00000046447
Zcchc24	6.47997e-11	-0.143324	0.492	0.497	1.3017e-06	ENSMUSG00000055538
Sod2	7.18823e-11	0.105062	0.441	0.308	1.44397e-06	ENSMUSG00000006818
Ifitm2	7.62774e-11	-0.0622364	0.862	0.809	1.53226e-06	ENSMUSG00000060591
Vgll3	8.76787e-11	0.0532715	0.066	0.025	1.76129e-06	ENSMUSG00000091243
Rffl	1.02098e-10	0.0714111	0.128	0.068	2.05095e-06	ENSMUSG00000020696
Csf1	1.11564e-10	-0.0398438	0.958	0.92	2.2411e-06	ENSMUSG00000014599
Idh1	1.16794e-10	0.12219	0.593	0.431	2.34615e-06	ENSMUSG00000025950
Col5a3	1.23395e-10	-0.158618	0.206	0.268	2.47875e-06	ENSMUSG00000004098
Pf4	1.24928e-10	-0.0653742	0.011	0.037	2.50955e-06	ENSMUSG00000029373
Hnrnpu	1.30926e-10	-0.0953389	0.662	0.627	2.63003e-06	ENSMUSG00000039630
Gpx8	1.31716e-10	-0.0696478	0.781	0.719	2.64592e-06	ENSMUSG00000021760
Rab31	1.3379e-10	0.0740075	0.242	0.153	2.68757e-06	ENSMUSG00000056515
Itgb1	1.41014e-10	-0.0363144	0.964	0.93	2.83269e-06	ENSMUSG00000025809
Timm23	1.48159e-10	0.0731632	0.244	0.156	2.97622e-06	ENSMUSG00000013701
Dgat2	1.5049e-10	0.0362093	0.031	0.005	3.02304e-06	ENSMUSG00000030747
mt-Nd3	1.51909e-10	-0.0452293	0.999	0.997	3.05155e-06	ENSMUSG00000064360
Cap1	1.58448e-10	0.094335	0.374	0.257	3.18291e-06	ENSMUSG00000028656
Slc12a4	1.61419e-10	0.074076	0.187	0.113	3.24259e-06	ENSMUSG00000017765
Csnk1a1	1.62252e-10	-0.109521	0.598	0.583	3.25932e-06	ENSMUSG00000024576
Klhl8	1.62803e-10	0.0617205	0.085	0.038	3.27038e-06	ENSMUSG00000029312
Tmem59	1.70254e-10	-0.0366021	0.96	0.924	3.42007e-06	ENSMUSG00000028618
St6galnac4	1.7867e-10	0.0725619	0.215	0.134	3.58913e-06	ENSMUSG00000079442
Tubb6	1.91936e-10	0.0514323	0.053	0.017	3.85561e-06	ENSMUSG00000001473
Unc5c	2.02962e-10	-0.0740265	0.018	0.049	4.07711e-06	ENSMUSG00000059921
Plbd2	2.12182e-10	0.0848285	0.305	0.205	4.26231e-06	ENSMUSG00000029598
Rps14	2.30796e-10	-0.054931	0.837	0.773	4.63624e-06	ENSMUSG00000024608
Hist1h1c	2.33876e-10	0.0965031	0.399	0.281	4.6981e-06	ENSMUSG00000036181
Gm8797	2.37095e-10	-0.155034	0.367	0.439	4.76276e-06	ENSMUSG00000103034
Zfp703	2.44052e-10	-0.170755	0.229	0.281	4.90251e-06	ENSMUSG00000085795
Irs1	2.44804e-10	0.0889547	0.401	0.275	4.91762e-06	ENSMUSG00000055980
Cnnm1	2.69766e-10	-0.156201	0.165	0.223	5.41906e-06	ENSMUSG00000025189
Afdn	2.86507e-10	0.0696753	0.132	0.073	5.75535e-06	ENSMUSG00000068036
Ppp1r3c	2.96815e-10	0.0494002	0.044	0.012	5.96243e-06	ENSMUSG00000067279
Man1a	2.97321e-10	-0.142167	0.502	0.51	5.97258e-06	ENSMUSG00000003746
Smim3	3.00484e-10	0.0756757	0.25	0.161	6.03612e-06	ENSMUSG00000038059
Ccl9	3.4095e-10	0.10076	0.233	0.152	6.84901e-06	ENSMUSG00000019122
Pcdh18	3.43969e-10	-0.169582	0.195	0.25	6.90965e-06	ENSMUSG00000037892
Dmpk	3.50452e-10	0.0696825	0.254	0.164	7.03989e-06	ENSMUSG00000030409
Gab1	3.51214e-10	-0.159683	0.168	0.223	7.05519e-06	ENSMUSG00000031714
Ppp2r1a	3.54539e-10	0.106914	0.515	0.369	7.12197e-06	ENSMUSG00000007564
Mrps6	3.58431e-10	0.083267	0.308	0.208	7.20017e-06	ENSMUSG00000039680
Fibin	3.77262e-10	-0.156527	0.118	0.171	7.57845e-06	ENSMUSG00000074971
Smoc2	3.99513e-10	0.0581734	0.078	0.034	8.02541e-06	ENSMUSG00000023886
Mrpl27	4.07903e-10	0.0667632	0.213	0.133	8.19395e-06	ENSMUSG00000024414
C3	4.13249e-10	-0.182832	0.327	0.382	8.30134e-06	ENSMUSG00000024164
Cdh11	4.14357e-10	-0.0297122	0.994	0.983	8.3236e-06	ENSMUSG00000031673
Ehd1	4.24087e-10	0.0586012	0.099	0.049	8.51906e-06	ENSMUSG00000024772
Ppbp	4.76604e-10	-0.0662585	0.013	0.04	9.57401e-06	ENSMUSG00000029372
Ubr4	4.94531e-10	0.0777965	0.255	0.166	9.93414e-06	ENSMUSG00000066036
Phlda1	4.98964e-10	0.0735598	0.143	0.082	1.00232e-05	ENSMUSG00000020205
Suclg1	5.14803e-10	0.0783761	0.301	0.2	1.03414e-05	ENSMUSG00000052738
Spata13	5.2473e-10	0.053694	0.069	0.029	1.05408e-05	ENSMUSG00000021990
Ecm2	5.32446e-10	-0.163427	0.25	0.306	1.06958e-05	ENSMUSG00000043631
Cnn3	5.79962e-10	-0.114672	0.551	0.543	1.16503e-05	ENSMUSG00000053931
Npnt	6.25126e-10	0.0601964	0.077	0.034	1.25575e-05	ENSMUSG00000040998
Zfp532	6.263e-10	0.0676371	0.179	0.108	1.25811e-05	ENSMUSG00000042439
Kcnk2	6.34854e-10	0.0973116	0.188	0.119	1.27529e-05	ENSMUSG00000037624
Il1rn	6.61229e-10	0.119186	0.596	0.455	1.32828e-05	ENSMUSG00000026981
Rpl17	6.67441e-10	-0.123895	0.826	0.809	1.34075e-05	ENSMUSG00000062328
Manf	7.54954e-10	0.103861	0.494	0.353	1.51655e-05	ENSMUSG00000032575
Ndufs2	7.70147e-10	0.0766905	0.329	0.22	1.54707e-05	ENSMUSG00000013593
Slc6a9	7.82446e-10	0.0621018	0.109	0.057	1.57178e-05	ENSMUSG00000028542
Adm	7.89048e-10	0.0585465	0.059	0.022	1.58504e-05	ENSMUSG00000030790
Rpl10	8.09986e-10	-0.0670886	0.914	0.872	1.6271e-05	ENSMUSG00000008682
Pik3r2	8.3217e-10	0.0606825	0.135	0.076	1.67166e-05	ENSMUSG00000031834
Hist1h2bc	8.41436e-10	0.112987	0.6	0.449	1.69028e-05	ENSMUSG00000018102
Atf5	8.57687e-10	0.0879694	0.306	0.21	1.72292e-05	ENSMUSG00000038539
Rtn4rl1	8.64411e-10	0.0903855	0.421	0.293	1.73643e-05	ENSMUSG00000045287
Klf2	8.97746e-10	0.0806944	0.259	0.171	1.80339e-05	ENSMUSG00000055148
Pth1r	9.10552e-10	0.089453	0.338	0.234	1.82912e-05	ENSMUSG00000032492
2005-03-01	9.19253e-10	0.0730789	0.23	0.148	1.84659e-05	ENSMUSG00000023307
Smdt1	9.20693e-10	0.0751512	0.214	0.137	1.84949e-05	ENSMUSG00000022452
Atp6v0a1	1.00006e-09	0.0658826	0.161	0.096	2.00891e-05	ENSMUSG00000019302
Tmem256	1.01542e-09	0.0754596	0.237	0.156	2.03978e-05	ENSMUSG00000070394
Scp2-ps2	1.05004e-09	0.0872932	0.535	0.413	2.10932e-05	ENSMUSG00000058492
Crispld2	1.06969e-09	0.0434543	0.031	0.006	2.14879e-05	ENSMUSG00000031825
Emilin1	1.08914e-09	0.0847276	0.318	0.219	2.18786e-05	ENSMUSG00000029163
Egfr	1.1148e-09	-0.155348	0.391	0.419	2.23941e-05	ENSMUSG00000020122
Itga3	1.12694e-09	0.0507971	0.06	0.023	2.2638e-05	ENSMUSG00000001507
Litaf	1.1298e-09	0.0741959	0.263	0.173	2.26954e-05	ENSMUSG00000022500
Ech1	1.17259e-09	0.0715808	0.253	0.166	2.35549e-05	ENSMUSG00000053898
Ywhae	1.26446e-09	-0.0347108	0.875	0.805	2.54006e-05	ENSMUSG00000020849
Plac9b	1.29464e-09	-0.112645	0.733	0.754	2.60067e-05	ENSMUSG00000072674
Hnrnpc	1.30643e-09	-0.0992896	0.684	0.655	2.62436e-05	ENSMUSG00000060373
Selenbp1	1.38893e-09	0.0604254	0.113	0.061	2.79009e-05	ENSMUSG00000068874
Bmp3	1.44726e-09	0.0371716	0.03	0.005	2.90726e-05	ENSMUSG00000029335
Smad3	1.44778e-09	0.0555751	0.071	0.031	2.9083e-05	ENSMUSG00000032402
Tax1bp1	1.56976e-09	-0.0955084	0.628	0.598	3.15333e-05	ENSMUSG00000004535
Saraf	1.63767e-09	0.100413	0.508	0.363	3.28975e-05	ENSMUSG00000031532
Rps12-ps3	1.68973e-09	-0.105307	0.832	0.848	3.39433e-05	ENSMUSG00000067038
Cybb	1.72457e-09	0.102543	0.186	0.119	3.46432e-05	ENSMUSG00000015340
Rpl35	1.75584e-09	-0.0906694	0.849	0.83	3.52714e-05	ENSMUSG00000062997
Arfip2	1.85698e-09	0.0683114	0.175	0.107	3.73031e-05	ENSMUSG00000030881
Sec61a1	1.86131e-09	0.0789054	0.292	0.199	3.73901e-05	ENSMUSG00000030082
Cox5a	1.94938e-09	0.0764583	0.229	0.15	3.9159e-05	ENSMUSG00000000088
Pla2g16	1.98042e-09	0.069797	0.214	0.137	3.97828e-05	ENSMUSG00000060675
Shisa5	2.08069e-09	0.0917149	0.456	0.319	4.17969e-05	ENSMUSG00000025647
Prkar1a	2.16197e-09	-0.0715736	0.714	0.655	4.34296e-05	ENSMUSG00000020612
Dtnbp1	2.25489e-09	0.0715615	0.335	0.229	4.52962e-05	ENSMUSG00000057531
Mad2l2	2.33341e-09	0.0614859	0.142	0.082	4.68735e-05	ENSMUSG00000029003
Larp6	2.38826e-09	0.0598903	0.127	0.071	4.79754e-05	ENSMUSG00000034839
Acox1	2.39366e-09	0.0622924	0.179	0.11	4.80838e-05	ENSMUSG00000020777
Top1	2.45946e-09	-0.137761	0.498	0.501	4.94057e-05	ENSMUSG00000070544
Ndufs1	2.62713e-09	0.0689587	0.223	0.144	5.27738e-05	ENSMUSG00000025968
Elmo1	2.66361e-09	0.0579297	0.105	0.056	5.35065e-05	ENSMUSG00000041112
Rps6-ps4	2.70147e-09	-0.12963	0.518	0.556	5.42672e-05	ENSMUSG00000081406
Neo1	2.73926e-09	0.0725507	0.276	0.185	5.50262e-05	ENSMUSG00000032340
C2	3.03226e-09	0.12502	0.734	0.599	6.0912e-05	ENSMUSG00000024371
Pdlim7	3.21193e-09	0.0584256	0.116	0.064	6.45212e-05	ENSMUSG00000021493
Pde9a	3.21935e-09	-0.0408101	0.004	0.022	6.46703e-05	ENSMUSG00000041119
Kif1c	3.25516e-09	0.0708994	0.26	0.171	6.53896e-05	ENSMUSG00000020821
Ctsd	3.28134e-09	0.0801245	0.318	0.221	6.59156e-05	ENSMUSG00000007891
2011-09-01	3.60638e-09	-0.0841883	0.679	0.636	7.24449e-05	ENSMUSG00000058013
Adra1b	3.62047e-09	0.038114	0.034	0.008	7.27279e-05	ENSMUSG00000050541
Oas1a	3.66785e-09	0.0381103	0.067	0.029	7.36798e-05	ENSMUSG00000052776
Rps12l1	3.73182e-09	-0.10741	0.731	0.774	7.49647e-05	ENSMUSG00000078087
Mxi1	3.75681e-09	-0.156973	0.276	0.32	7.54669e-05	ENSMUSG00000025025
Elmo2	3.83969e-09	0.0723291	0.317	0.216	7.71316e-05	ENSMUSG00000017670
Slc6a20a	3.89349e-09	-0.0448968	0.008	0.03	7.82123e-05	ENSMUSG00000036814
Slc25a1	4.01413e-09	0.0670137	0.209	0.134	8.06359e-05	ENSMUSG00000003528
Gm6749	4.07384e-09	-0.0180399	0.009	0.03	8.18353e-05	ENSMUSG00000107751
1810010H24Rik	4.19191e-09	0.0480391	0.059	0.024	8.4207e-05	ENSMUSG00000078607
Rhbdf1	4.23809e-09	0.0810829	0.354	0.249	8.51348e-05	ENSMUSG00000020282
P2ry14	4.40525e-09	-0.128795	0.085	0.132	8.84926e-05	ENSMUSG00000036381
Spp1	4.95066e-09	0.124624	0.789	0.644	9.94489e-05	ENSMUSG00000029304
Fgfrl1	4.96622e-09	0.089364	0.403	0.287	9.97615e-05	ENSMUSG00000008090
Ism1	4.98252e-09	-0.138382	0.459	0.472	0.000100089	ENSMUSG00000074766
Lbp	5.03614e-09	-0.122345	0.571	0.553	0.000101166	ENSMUSG00000016024
Cox7b	5.29258e-09	0.0889994	0.45	0.324	0.000106317	ENSMUSG00000031231
Esyt1	5.4324e-09	0.0916031	0.455	0.328	0.000109126	ENSMUSG00000025366
Cul1	5.71869e-09	-0.14992	0.394	0.414	0.000114877	ENSMUSG00000029686
Gm20634	5.88655e-09	0.0424842	0.205	0.135	0.000118249	ENSMUSG00000070392
Stk25	5.95229e-09	0.0573849	0.198	0.125	0.00011957	ENSMUSG00000026277
Mmp23	5.98228e-09	0.0750496	0.304	0.21	0.000120172	ENSMUSG00000029061
Prdx5	6.19197e-09	0.126286	0.757	0.594	0.000124384	ENSMUSG00000024953
Hmgn3	6.35137e-09	0.0968835	0.51	0.372	0.000127586	ENSMUSG00000066456
Rps27a	6.36981e-09	-0.0922148	0.828	0.791	0.000127957	ENSMUSG00000020460
Tm7sf3	6.47672e-09	0.0634791	0.195	0.124	0.000130104	ENSMUSG00000040234
Gak	6.47908e-09	0.0603968	0.147	0.088	0.000130152	ENSMUSG00000062234
Kirrel	6.51967e-09	0.118178	0.643	0.489	0.000130967	ENSMUSG00000041734
Stat5a	6.59602e-09	0.0672687	0.149	0.089	0.000132501	ENSMUSG00000004043
Srrm2	6.61192e-09	-0.137462	0.481	0.485	0.00013282	ENSMUSG00000039218
Qsox1	6.62653e-09	0.0767619	0.348	0.243	0.000133114	ENSMUSG00000033684
Cmtm6	7.13078e-09	0.0794597	0.35	0.247	0.000143243	ENSMUSG00000032434
St3gal3	7.28563e-09	0.0519882	0.101	0.054	0.000146354	ENSMUSG00000028538
Amotl2	7.41018e-09	0.114335	0.655	0.501	0.000148856	ENSMUSG00000032531
Calm2	7.50474e-09	-0.0779505	0.7	0.651	0.000150755	ENSMUSG00000036438
Snhg3	7.79433e-09	0.0656116	0.19	0.121	0.000156572	ENSMUSG00000085241
Fndc3a	7.82987e-09	-0.151713	0.156	0.206	0.000157286	ENSMUSG00000033487
S100a16	7.88794e-09	0.0883005	0.44	0.318	0.000158453	ENSMUSG00000074457
Pdp2	7.89135e-09	0.0634314	0.112	0.062	0.000158521	ENSMUSG00000048371
Epn1	8.0909e-09	0.0676834	0.261	0.176	0.00016253	ENSMUSG00000035203
53885	8.12356e-09	0.0643756	0.247	0.165	0.000163186	NA
Adgre5	8.22574e-09	0.0553694	0.109	0.06	0.000165239	ENSMUSG00000002885
Usmg5	8.48754e-09	0.0724672	0.431	0.314	0.000170498	ENSMUSG00000071528
H2-K1	8.66777e-09	-0.0285641	1	1	0.000174118	ENSMUSG00000061232
St6gal1	8.73975e-09	0.059107	0.162	0.099	0.000175564	ENSMUSG00000022885
Epdr1	8.89142e-09	-0.0418596	0.885	0.832	0.000178611	ENSMUSG00000002808
C1qtnf6	9.08421e-09	0.0657837	0.206	0.134	0.000182484	ENSMUSG00000022440
Ilk	9.81952e-09	0.0644283	0.264	0.177	0.000197255	ENSMUSG00000030890
Lims1	9.97302e-09	-0.112451	0.551	0.541	0.000200338	ENSMUSG00000019920
Scarf2	1.00232e-08	0.0686311	0.238	0.159	0.000201347	ENSMUSG00000012017
H1f0	1.0105e-08	0.0879203	0.383	0.278	0.000202989	ENSMUSG00000096210
Pfdn1	1.09607e-08	0.069617	0.246	0.167	0.000220178	ENSMUSG00000024346
Tifa	1.12536e-08	-0.139319	0.115	0.162	0.000226062	ENSMUSG00000046688
Oas1g	1.13569e-08	0.0340721	0.057	0.024	0.000228138	ENSMUSG00000066861
Ube2a	1.15906e-08	0.0650494	0.209	0.136	0.000232832	ENSMUSG00000016308
Rnh1	1.21961e-08	0.0442888	0.133	0.077	0.000244994	ENSMUSG00000038650
Wbp1l	1.22217e-08	0.0686677	0.235	0.158	0.000245509	ENSMUSG00000047731
Tpp1	1.24564e-08	0.0852118	0.431	0.307	0.000250224	ENSMUSG00000030894
Slc35b1	1.25375e-08	0.0668759	0.337	0.233	0.000251852	ENSMUSG00000020873
Acan	1.25843e-08	0.055984	0.07	0.032	0.000252793	ENSMUSG00000030607
Slc23a2	1.27053e-08	0.0526718	0.116	0.065	0.000255223	ENSMUSG00000027340
Pcsk6	1.32775e-08	0.0445826	0.036	0.01	0.000266718	ENSMUSG00000030513
Osbpl5	1.3597e-08	0.0716709	0.318	0.222	0.000273136	ENSMUSG00000037606
Cbfb	1.38006e-08	0.0540788	0.166	0.102	0.000277226	ENSMUSG00000031885
Sh3glb1	1.42039e-08	-0.102017	0.593	0.565	0.000285328	ENSMUSG00000037062
Gabarap	1.44188e-08	-0.045411	0.829	0.763	0.000289644	ENSMUSG00000018567
Psmb6	1.44237e-08	0.0705824	0.219	0.145	0.000289743	ENSMUSG00000018286
Dynlt1a	1.46337e-08	0.0508629	0.399	0.3	0.000293962	ENSMUSG00000092074
Irx5	1.47306e-08	0.064894	0.139	0.084	0.000295909	ENSMUSG00000031737
Wbp2	1.48782e-08	0.0690832	0.316	0.217	0.000298873	ENSMUSG00000034341
Sccpdh	1.49006e-08	0.0557302	0.111	0.062	0.000299324	ENSMUSG00000038936
Pex16	1.49801e-08	0.0455808	0.065	0.029	0.000300921	ENSMUSG00000027222
Rpl13	1.50297e-08	-0.0763719	0.921	0.902	0.000301917	ENSMUSG00000000740
Ndst1	1.54002e-08	0.0795819	0.39	0.278	0.000309359	ENSMUSG00000054008
Galnt10	1.57743e-08	0.0517882	0.107	0.058	0.000316873	ENSMUSG00000020520
Emc7	1.57995e-08	-0.104498	0.571	0.55	0.000317381	ENSMUSG00000055943
Rpl35a	1.58581e-08	-0.0931717	0.837	0.803	0.000318558	ENSMUSG00000060636
Rpl28	1.58901e-08	-0.115465	0.683	0.661	0.0003192	ENSMUSG00000030432
Ssr3	1.59156e-08	-0.0323689	0.838	0.758	0.000319713	ENSMUSG00000027828
Rab10	1.60269e-08	-0.10027	0.578	0.547	0.000321948	ENSMUSG00000020671
Ykt6	1.61234e-08	0.0549254	0.161	0.099	0.000323887	ENSMUSG00000002741
Reep4	1.62585e-08	0.0466279	0.066	0.029	0.000326601	ENSMUSG00000033589
Etv5	1.63941e-08	0.0600041	0.132	0.078	0.000329326	ENSMUSG00000013089
Crtap	1.67001e-08	-0.0538995	0.772	0.706	0.000335471	ENSMUSG00000032431
Eva1b	1.76368e-08	0.0730546	0.257	0.177	0.000354287	ENSMUSG00000050212
Dclk1	1.79047e-08	-0.15391	0.222	0.269	0.00035967	ENSMUSG00000027797
Rab34	1.83417e-08	0.0604437	0.194	0.125	0.000368449	ENSMUSG00000002059
Rps20	1.85099e-08	-0.0603282	0.946	0.91	0.000371828	ENSMUSG00000028234
Apobec1	1.85951e-08	0.0667372	0.303	0.21	0.000373538	ENSMUSG00000040613
Tmem134	1.86452e-08	0.0657999	0.27	0.184	0.000374545	ENSMUSG00000024845
Myh11	1.93104e-08	-0.0370168	0.004	0.02	0.000387907	ENSMUSG00000018830
Kat2b	1.94221e-08	0.0614996	0.166	0.104	0.00039015	ENSMUSG00000000708
Mtss1	1.94433e-08	0.066327	0.175	0.111	0.000390577	ENSMUSG00000022353
Map2k1	1.96079e-08	0.0642848	0.339	0.237	0.000393883	ENSMUSG00000004936
Higd1a	2.02836e-08	0.0478262	0.112	0.063	0.000407457	ENSMUSG00000038412
Aldh1a2	2.0691e-08	-0.167191	0.39	0.416	0.000415641	ENSMUSG00000013584
Trp53inp1	2.09164e-08	0.0500798	0.124	0.071	0.000420169	ENSMUSG00000028211
52966	2.17037e-08	-0.0580431	0.101	0.151	0.000435983	NA
Abhd17c	2.17872e-08	0.0583958	0.115	0.066	0.000437661	ENSMUSG00000038459
Lama4	2.18001e-08	-0.154912	0.357	0.383	0.00043792	ENSMUSG00000019846
Plod1	2.22653e-08	0.0535911	0.185	0.117	0.000447265	ENSMUSG00000019055
Rab3d	2.25889e-08	0.0528251	0.14	0.084	0.000453767	ENSMUSG00000019066
Pon2	2.27786e-08	-0.114442	0.523	0.514	0.000457577	ENSMUSG00000032667
Lamb2	2.36923e-08	0.0612694	0.186	0.12	0.00047593	ENSMUSG00000052911
Timm10b	2.44431e-08	0.048481	0.192	0.125	0.000491014	ENSMUSG00000089847
Nlrx1	2.49678e-08	0.0514152	0.069	0.032	0.000501552	ENSMUSG00000032109
Pafah2	2.59875e-08	0.0590272	0.161	0.1	0.000522037	ENSMUSG00000037366
Fam20a	2.67025e-08	0.071847	0.276	0.192	0.0005364	ENSMUSG00000020614
Adgrl1	2.76319e-08	0.0636365	0.253	0.171	0.00055507	ENSMUSG00000013033
Kcnip3	2.77048e-08	-0.15149	0.3	0.338	0.000556534	ENSMUSG00000079056
Ptx3	2.83341e-08	-0.150123	0.336	0.377	0.000569175	ENSMUSG00000027832
Pnpla2	2.83622e-08	0.0494271	0.083	0.042	0.000569739	ENSMUSG00000025509
Epha2	2.85935e-08	0.036008	0.03	0.007	0.000574386	ENSMUSG00000006445
Eps8	2.87713e-08	0.0459198	0.082	0.041	0.000577959	ENSMUSG00000015766
Echs1	2.93797e-08	0.0686465	0.251	0.172	0.000590179	ENSMUSG00000025465
Mzt2	2.97371e-08	0.0534199	0.124	0.072	0.000597359	ENSMUSG00000022671
Rcc2	2.99248e-08	0.0570711	0.153	0.094	0.00060113	ENSMUSG00000040945
AC153153.2	3.01067e-08	-0.0279152	0.016	0.041	0.000604784	ENSMUSG00000114759
Tnc	3.03422e-08	-0.0469701	0.955	0.942	0.000609515	ENSMUSG00000028364
Iah1	3.09969e-08	0.0609476	0.227	0.152	0.000622667	ENSMUSG00000062054
Rras2	3.16086e-08	0.0548638	0.146	0.089	0.000634954	ENSMUSG00000055723
Grcc10	3.26749e-08	0.0457806	0.29	0.205	0.000656373	ENSMUSG00000072772
Rps27rt	3.30482e-08	-0.0667573	0.891	0.864	0.000663871	ENSMUSG00000050621
Tpm1	3.43931e-08	-0.0348218	0.994	0.99	0.000690888	ENSMUSG00000032366
Erp29	3.60189e-08	0.0790756	0.381	0.276	0.000723548	ENSMUSG00000029616
AI464131	3.61151e-08	0.0602905	0.206	0.135	0.00072548	ENSMUSG00000046312
4930533O14Rik	3.65825e-08	0.0550299	0.131	0.078	0.000734869	ENSMUSG00000063904
Hist1h2ak	3.7781e-08	-0.00629988	0.004	0.019	0.000758946	ENSMUSG00000063021
Serbp1	3.7881e-08	-0.0630509	0.728	0.669	0.000760954	ENSMUSG00000036371
52854	3.80551e-08	-0.0574794	0.102	0.152	0.000764451	NA
Rnase4	3.82933e-08	-0.128139	0.459	0.468	0.000769236	ENSMUSG00000021876
Hnrnpa0	3.83026e-08	-0.0986364	0.593	0.567	0.000769423	ENSMUSG00000007836
Plxna1	3.86088e-08	0.0592078	0.261	0.178	0.000775573	ENSMUSG00000030084
Klf10	3.87934e-08	0.0589534	0.194	0.126	0.000779282	ENSMUSG00000037465
Tcn2	3.90943e-08	0.0954905	0.502	0.368	0.000785326	ENSMUSG00000020432
Pdia3	3.97166e-08	-0.0326602	0.875	0.811	0.000797827	ENSMUSG00000027248
Slco3a1	4.02091e-08	0.0776819	0.371	0.266	0.00080772	ENSMUSG00000025790
Wif1	4.07803e-08	-0.149405	0.343	0.381	0.000819195	ENSMUSG00000020218
Ak2	4.14334e-08	0.0698587	0.262	0.181	0.000832315	ENSMUSG00000028792
Clptm1l	4.19333e-08	0.0619236	0.293	0.203	0.000842356	ENSMUSG00000021610
Lgals3bp	4.22983e-08	0.102371	0.919	0.804	0.000849688	ENSMUSG00000033880
Aoc3	4.26421e-08	0.0502942	0.056	0.024	0.000856594	ENSMUSG00000019326
Nuak1	4.34323e-08	0.0686513	0.282	0.197	0.000872469	ENSMUSG00000020032
Rpl14	4.35844e-08	-0.129733	0.561	0.553	0.000875523	ENSMUSG00000025794
Cpt2	4.39746e-08	0.0454984	0.083	0.042	0.000883362	ENSMUSG00000028607
Mtch1	4.42683e-08	0.100714	0.582	0.436	0.000889262	ENSMUSG00000024012
Xdh	4.66531e-08	0.0708789	0.261	0.18	0.000937168	ENSMUSG00000024066
Smarca2	4.70948e-08	-0.0979527	0.611	0.593	0.000946041	ENSMUSG00000024921
Ncald	5.10818e-08	-0.143902	0.179	0.226	0.00102613	ENSMUSG00000051359
Slc25a17	5.20035e-08	0.0749003	0.339	0.244	0.00104465	ENSMUSG00000022404
Ctsl	5.21555e-08	0.106751	0.892	0.758	0.0010477	ENSMUSG00000021477
Vasn	5.27993e-08	0.0657848	0.224	0.15	0.00106063	ENSMUSG00000039646
Rnf123	5.28564e-08	0.0484326	0.074	0.036	0.00106178	ENSMUSG00000041528
Mtch2	5.36906e-08	0.0649527	0.275	0.19	0.00107854	ENSMUSG00000027282
Hmgn1	5.37945e-08	-0.0770578	0.679	0.637	0.00108062	ENSMUSG00000040681
Cd47	5.44768e-08	-0.0597892	0.761	0.713	0.00109433	ENSMUSG00000055447
Hist1h2ao	5.48189e-08	-0.021619	0.018	0.044	0.0011012	ENSMUSG00000094248
Fam198b	5.67447e-08	0.032854	0.025	0.005	0.00113989	ENSMUSG00000027955
Osmr	5.80961e-08	-0.151988	0.293	0.331	0.00116703	ENSMUSG00000022146
Cnn2	5.81703e-08	0.112122	0.86	0.727	0.00116852	ENSMUSG00000004665
Stx6	5.96735e-08	0.0536882	0.148	0.092	0.00119872	ENSMUSG00000026470
Rbp1	6.17522e-08	0.0600215	0.143	0.088	0.00124048	ENSMUSG00000046402
Slc39a3	6.23023e-08	0.0520257	0.123	0.072	0.00125153	ENSMUSG00000046822
Tgfbr3	6.36051e-08	-0.039438	0.844	0.774	0.0012777	ENSMUSG00000029287
Pigyl	6.4482e-08	0.057115	0.208	0.138	0.00129531	ENSMUSG00000010607
Dnaja1	6.61113e-08	-0.142882	0.489	0.508	0.00132804	ENSMUSG00000028410
Timp2	6.6175e-08	-0.026925	0.892	0.831	0.00132932	ENSMUSG00000017466
Galk2	6.91959e-08	0.0563459	0.121	0.071	0.00139001	ENSMUSG00000027207
Ndufs5	7.26848e-08	0.0615897	0.489	0.363	0.00146009	ENSMUSG00000028648
Fhl2	7.54116e-08	0.115001	0.723	0.578	0.00151487	ENSMUSG00000008136
Pltp	7.80293e-08	0.0819699	0.442	0.326	0.00156745	ENSMUSG00000017754
Vsnl1	7.82621e-08	-0.0639043	0.02	0.046	0.00157213	ENSMUSG00000054459
Fgfr3	7.89376e-08	0.0633301	0.154	0.098	0.0015857	ENSMUSG00000054252
Htra1	7.95586e-08	-0.14419	0.332	0.366	0.00159817	ENSMUSG00000006205
Slc9a6	8.04863e-08	0.0545531	0.162	0.103	0.00161681	ENSMUSG00000060681
Mpc2	8.11184e-08	0.0894232	0.458	0.342	0.00162951	ENSMUSG00000026568
Plac8	8.30489e-08	-0.120759	0.106	0.151	0.00166829	ENSMUSG00000029322
Adamtsl3	8.32466e-08	0.0572448	0.119	0.071	0.00167226	ENSMUSG00000070469
Gmppa	8.3645e-08	0.0546436	0.213	0.142	0.00168026	ENSMUSG00000033021
Col11a2	8.36502e-08	0.052249	0.105	0.059	0.00168037	ENSMUSG00000024330
Dclk2	8.74518e-08	0.0425146	0.063	0.029	0.00175673	ENSMUSG00000028078
Pdlim4	8.9328e-08	0.0627019	0.218	0.148	0.00179442	ENSMUSG00000020388
Hist1h2ap	8.97784e-08	-0.0211826	0.019	0.044	0.00180347	ENSMUSG00000094777
Gpi1	9.22909e-08	0.0576678	0.226	0.152	0.00185394	ENSMUSG00000036427
Uqcrfs1	9.28519e-08	0.0620018	0.237	0.163	0.00186521	ENSMUSG00000038462
Zc2hc1a	9.28701e-08	0.060467	0.171	0.111	0.00186557	ENSMUSG00000043542
Prkab2	9.29801e-08	0.0671291	0.297	0.21	0.00186778	ENSMUSG00000038205
Ccl4	9.63575e-08	-0.0205787	0	0.009	0.00193563	ENSMUSG00000018930
Cirbp	1.04449e-07	0.0502166	0.147	0.091	0.00209818	ENSMUSG00000045193
Dynlt1f	1.05416e-07	0.0598049	0.402	0.314	0.0021176	ENSMUSG00000095677
Clec11a	1.05931e-07	0.0966338	0.575	0.441	0.00212794	ENSMUSG00000004473
Wnt5a	1.07465e-07	0.0430417	0.08	0.041	0.00215875	ENSMUSG00000021994
Naa60	1.08462e-07	0.0535463	0.236	0.16	0.00217879	ENSMUSG00000005982
Ptprcap	1.09402e-07	0.0415982	0.281	0.197	0.00219767	ENSMUSG00000045826
Extl3	1.12717e-07	0.0642238	0.312	0.218	0.00226426	ENSMUSG00000021978
Qrich1	1.15187e-07	0.0593009	0.202	0.135	0.00231388	ENSMUSG00000006673
Rps27	1.16304e-07	-0.0612533	0.918	0.881	0.00233631	ENSMUSG00000090733
Cxcl5	1.16663e-07	0.0328816	0.02	0.003	0.00234352	ENSMUSG00000029371
Heg1	1.17803e-07	0.0683345	0.253	0.176	0.00236642	ENSMUSG00000075254
Parp3	1.18878e-07	0.0704008	0.324	0.231	0.00238803	ENSMUSG00000023249
G6pdx	1.19536e-07	0.0566721	0.324	0.228	0.00240125	ENSMUSG00000031400
Ubc	1.20786e-07	0.0930181	0.922	0.811	0.00242634	ENSMUSG00000008348
Fgl2	1.22792e-07	0.0565972	0.246	0.169	0.00246665	ENSMUSG00000039899
Srsf9	1.24928e-07	0.0692051	0.337	0.242	0.00250956	ENSMUSG00000029538
Npepl1	1.25053e-07	0.0475984	0.119	0.07	0.00251206	ENSMUSG00000039263
Myh9	1.30703e-07	-0.0523877	0.754	0.692	0.00262556	ENSMUSG00000022443
Peg13	1.30818e-07	-0.146257	0.258	0.298	0.00262786	ENSMUSG00000106847
Nhs	1.32071e-07	-0.0946718	0.059	0.097	0.00265303	ENSMUSG00000059493
Car1	1.3481e-07	-0.0421044	0.007	0.025	0.00270806	ENSMUSG00000027556
Ndufb9	1.38191e-07	0.0538134	0.276	0.191	0.00277597	ENSMUSG00000022354
Mrps34	1.43203e-07	0.0545732	0.314	0.229	0.00287666	ENSMUSG00000038880
Lrrn1	1.44194e-07	0.0563242	0.067	0.032	0.00289657	ENSMUSG00000034648
Hmgn5	1.44897e-07	0.0568584	0.169	0.112	0.00291068	ENSMUSG00000031245
Ash1l	1.47932e-07	-0.156316	0.268	0.302	0.00297165	ENSMUSG00000028053
Trim2	1.58014e-07	-0.136777	0.342	0.373	0.00317419	ENSMUSG00000027993
Zfand3	1.6278e-07	0.0573643	0.322	0.228	0.00326992	ENSMUSG00000044477
Paqr7	1.64225e-07	0.0435947	0.079	0.041	0.00329895	ENSMUSG00000037348
Dab2	1.65037e-07	-0.148965	0.299	0.332	0.00331527	ENSMUSG00000022150
Limd2	1.68952e-07	0.0442462	0.167	0.107	0.00339391	ENSMUSG00000040699
Acer2	1.74063e-07	0.039354	0.047	0.019	0.00349658	ENSMUSG00000038007
Hes1	1.75095e-07	-0.125617	0.507	0.522	0.00351731	ENSMUSG00000022528
Zyx	1.75209e-07	0.0547788	0.205	0.138	0.00351959	ENSMUSG00000029860
Ybx1	1.75467e-07	-0.0596463	0.756	0.701	0.00352477	ENSMUSG00000028639
Cdk2ap2	1.85444e-07	0.0570337	0.203	0.137	0.0037252	ENSMUSG00000024856
4931406C07Rik	1.85456e-07	0.0585948	0.205	0.139	0.00372545	ENSMUSG00000031938
Glipr1	1.8843e-07	0.0275215	0.028	0.007	0.00378518	ENSMUSG00000056888
Hspa5	1.89327e-07	-0.0339123	0.987	0.971	0.0038032	ENSMUSG00000026864
Fibp	1.91777e-07	0.0549985	0.195	0.13	0.00385242	ENSMUSG00000024911
Adam9	1.91796e-07	0.0805247	0.49	0.361	0.00385279	ENSMUSG00000031555
Selenot	1.95535e-07	-0.12804	0.418	0.425	0.00392791	ENSMUSG00000075700
Ifi27	2.01827e-07	0.0997861	0.581	0.439	0.00405431	ENSMUSG00000064215
1810055G02Rik	2.0482e-07	0.0579301	0.188	0.125	0.00411442	ENSMUSG00000035372
Sptlc1	2.05558e-07	0.061162	0.212	0.145	0.00412926	ENSMUSG00000021468
Gm15590	2.1654e-07	-0.0171599	0.001	0.012	0.00434986	ENSMUSG00000058542
Tpst2	2.17007e-07	0.0516393	0.19	0.125	0.00435924	ENSMUSG00000029344
Adprh	2.19161e-07	0.0554744	0.276	0.194	0.0044025	ENSMUSG00000002844
54300	2.20153e-07	0.0561184	0.218	0.148	0.00442244	NA
Rps16	2.23834e-07	-0.0787488	0.843	0.806	0.00449637	ENSMUSG00000037563
Ms4a4d	2.23843e-07	-0.055251	0.806	0.76	0.00449656	ENSMUSG00000024678
AW112010	2.24547e-07	-0.128139	0.432	0.449	0.0045107	ENSMUSG00000075010
Trf	2.25598e-07	-0.0988481	0.632	0.647	0.0045318	ENSMUSG00000032554
Psmd1	2.26135e-07	0.0633626	0.354	0.259	0.0045426	ENSMUSG00000026229
Pqlc2	2.37121e-07	0.0323004	0.042	0.016	0.00476328	ENSMUSG00000028744
Fah	2.39956e-07	0.0449655	0.104	0.06	0.00482023	ENSMUSG00000030630
Swap70	2.4145e-07	0.0579368	0.181	0.121	0.00485025	ENSMUSG00000031015
Rnpep	2.41674e-07	0.0495354	0.117	0.07	0.00485475	ENSMUSG00000041926
Ncl	2.42617e-07	-0.0720134	0.696	0.652	0.00487369	ENSMUSG00000026234
Rft1	2.49878e-07	0.0515392	0.111	0.066	0.00501955	ENSMUSG00000052395
Tmem55b	2.50322e-07	0.0482422	0.178	0.116	0.00502847	ENSMUSG00000035953
Adamts15	2.51817e-07	0.041248	0.048	0.02	0.0050585	ENSMUSG00000033453
Tsen34	2.54808e-07	0.045843	0.28	0.2	0.00511859	ENSMUSG00000035585
Gm7964	2.68919e-07	-0.0456597	0.021	0.047	0.00540204	ENSMUSG00000063902
Gm15501	2.71519e-07	-0.0640364	0.191	0.251	0.00545428	ENSMUSG00000087412
Serpinf1	2.73043e-07	0.065806	0.343	0.249	0.00548489	ENSMUSG00000000753
Cggbp1	2.835e-07	-0.145455	0.302	0.331	0.00569494	ENSMUSG00000054604
Tmem9	2.90361e-07	0.0602574	0.231	0.16	0.00583278	ENSMUSG00000026411
Serinc1	3.01937e-07	-0.100471	0.567	0.542	0.00606531	ENSMUSG00000019877
Gm15417	3.03482e-07	0.0419701	0.074	0.038	0.00609634	ENSMUSG00000074466
Eef1b2	3.08606e-07	-0.0975654	0.619	0.587	0.00619928	ENSMUSG00000025967
Cbx6	3.30748e-07	0.0851203	0.513	0.38	0.00664408	ENSMUSG00000089715
Qars	3.41463e-07	0.0401297	0.088	0.048	0.0068593	ENSMUSG00000032604
Acaa1a	3.57529e-07	0.0471359	0.162	0.107	0.00718203	ENSMUSG00000036138
Asph	3.59537e-07	-0.10679	0.533	0.512	0.00722239	ENSMUSG00000028207
Napa	3.74548e-07	0.0624574	0.367	0.265	0.00752392	ENSMUSG00000006024
Cldn11	3.77923e-07	0.072	0.067	0.034	0.00759171	ENSMUSG00000037625
Tubb4b	3.82047e-07	0.0480631	0.174	0.115	0.00767455	ENSMUSG00000036752
Ctse	3.84235e-07	-0.0228957	0.001	0.012	0.00771851	ENSMUSG00000004552
Ch25h	3.87914e-07	0.0322804	0.023	0.005	0.00779241	ENSMUSG00000050370
Polr2i	3.91123e-07	0.0454358	0.116	0.07	0.00785688	ENSMUSG00000019738
Dagla	3.92776e-07	0.0359375	0.036	0.012	0.00789009	ENSMUSG00000035735
Selenof	3.96373e-07	-0.0307251	0.903	0.848	0.00796233	ENSMUSG00000037072
Unc5b	4.06e-07	0.0462683	0.206	0.139	0.00815573	ENSMUSG00000020099
Tor3a	4.06476e-07	0.0482003	0.214	0.144	0.00816528	ENSMUSG00000060519
Ndufc1	4.0987e-07	0.0572888	0.3	0.211	0.00823346	ENSMUSG00000037152
Sorbs3	4.12067e-07	0.0432252	0.245	0.169	0.0082776	ENSMUSG00000022091
Ano8	4.21399e-07	0.044502	0.088	0.049	0.00846507	ENSMUSG00000034863
Camk2g	4.32403e-07	0.0397926	0.125	0.077	0.00868611	ENSMUSG00000021820
G0s2	4.35871e-07	0.0479149	0.118	0.071	0.00875579	ENSMUSG00000009633
Sh3pxd2a	4.44833e-07	0.0582477	0.318	0.228	0.0089358	ENSMUSG00000053617
Cyb5b	4.48623e-07	0.0495094	0.271	0.191	0.00901193	ENSMUSG00000031924
Syt6	4.56026e-07	0.0475295	0.086	0.048	0.00916066	ENSMUSG00000027849
Npdc1	4.7784e-07	0.0528442	0.219	0.149	0.00959885	ENSMUSG00000015094
51669	5.08142e-07	0.0616692	0.349	0.253	0.0102076	NA
Atp6v0b	5.11946e-07	0.0435259	0.149	0.095	0.010284	ENSMUSG00000033379
Shisa4	5.16165e-07	0.0530695	0.198	0.135	0.0103687	ENSMUSG00000041889
Acot9	5.2956e-07	0.0398137	0.08	0.043	0.0106378	ENSMUSG00000025287
Dnajc19	5.32104e-07	0.0476193	0.235	0.165	0.0106889	ENSMUSG00000027679
Scamp4	5.40945e-07	0.0266373	0.18	0.118	0.0108665	ENSMUSG00000113949
Igf2r	5.41962e-07	0.0571462	0.241	0.169	0.0108869	ENSMUSG00000023830
Cercam	5.57564e-07	0.047812	0.099	0.057	0.0112004	ENSMUSG00000039787
Zcchc14	5.59922e-07	-0.137531	0.271	0.304	0.0112477	ENSMUSG00000061410
Cs	5.60552e-07	0.0521394	0.257	0.18	0.0112604	ENSMUSG00000005683
Dlx6	5.66117e-07	0.0483723	0.123	0.076	0.0113722	ENSMUSG00000029754
Fbxw9	5.68246e-07	0.0343921	0.038	0.014	0.0114149	ENSMUSG00000008167
Rps12-ps9	5.80224e-07	-0.102944	0.466	0.518	0.0116555	ENSMUSG00000069862
Adat3.1	5.97792e-07	0.0272819	0.182	0.12	0.0120085	NA
Rsph3b	5.99461e-07	0.035998	0.119	0.073	0.012042	ENSMUSG00000023806
Gpx1	6.00368e-07	0.0557602	0.336	0.243	0.0120602	ENSMUSG00000063856
Slco1a4	6.09281e-07	-0.0461079	0.014	0.036	0.0122392	ENSMUSG00000030237
Foxn3	6.1062e-07	0.0711858	0.459	0.342	0.0122661	ENSMUSG00000033713
Tmod3	6.33252e-07	-0.0910772	0.573	0.549	0.0127208	ENSMUSG00000058587
Sptan1	6.45211e-07	0.0729303	0.439	0.324	0.012961	ENSMUSG00000057738
Hist1h2ag	6.79925e-07	-0.0108615	0.013	0.032	0.0136583	ENSMUSG00000069301
Serp1	6.81113e-07	0.0608285	0.344	0.25	0.0136822	ENSMUSG00000027808
Keap1	6.8438e-07	0.0507374	0.183	0.123	0.0137478	ENSMUSG00000003308
Srp9	6.91438e-07	0.0571689	0.315	0.226	0.0138896	ENSMUSG00000026511
Sc5d	7.14129e-07	0.0447698	0.143	0.092	0.0143454	ENSMUSG00000032018
Dirc2	7.16574e-07	0.0393435	0.168	0.11	0.0143945	ENSMUSG00000022848
Ndufb6	7.28246e-07	0.0545644	0.258	0.182	0.014629	ENSMUSG00000071014
Lmna	7.54022e-07	0.0518791	0.194	0.131	0.0151468	ENSMUSG00000028063
Tgfbi	7.55042e-07	0.0478376	0.06	0.029	0.0151673	ENSMUSG00000035493
Gbe1	7.58779e-07	0.0496821	0.108	0.065	0.0152423	ENSMUSG00000022707
Rpl21	7.62494e-07	-0.136465	0.704	0.686	0.015317	ENSMUSG00000041453
Zbp1	8.13885e-07	0.052097	0.108	0.066	0.0163493	ENSMUSG00000027514
Zfp638	8.23909e-07	-0.132487	0.163	0.204	0.0165507	ENSMUSG00000030016
Prkaca	8.80978e-07	0.0548145	0.256	0.182	0.0176971	ENSMUSG00000005469
H2afy	8.83497e-07	0.0650077	0.392	0.289	0.0177477	ENSMUSG00000015937
Ptpn21	8.93234e-07	0.0386247	0.117	0.072	0.0179433	ENSMUSG00000021009
Kcnh1	9.03826e-07	0.034246	0.047	0.02	0.0181561	ENSMUSG00000058248
Gpc1	9.52669e-07	0.0474457	0.204	0.139	0.0191372	ENSMUSG00000034220
Cstf2t	9.77189e-07	0.0432351	0.155	0.101	0.0196298	ENSMUSG00000053536
Plod3	9.96587e-07	0.0629235	0.33	0.244	0.0200194	ENSMUSG00000004846
Gm6169	9.98184e-07	0.0400462	0.163	0.11	0.0200515	ENSMUSG00000057762
Tmed4	9.98413e-07	0.044348	0.138	0.088	0.0200561	ENSMUSG00000004394
Pmpcb	9.99418e-07	0.0548855	0.281	0.201	0.0200763	ENSMUSG00000029017
Pts	1.01238e-06	0.0456644	0.13	0.083	0.0203367	ENSMUSG00000032067
Zfp503	1.058e-06	0.0494333	0.182	0.123	0.0212531	ENSMUSG00000039081
Nme1	1.05929e-06	0.0523009	0.265	0.188	0.021279	ENSMUSG00000037601
Sh3bp5	1.07197e-06	0.0658647	0.446	0.33	0.0215338	ENSMUSG00000021892
Jup	1.10321e-06	0.0503806	0.244	0.17	0.0221613	ENSMUSG00000001552
Plekhm3	1.11945e-06	0.0615195	0.206	0.144	0.0224875	ENSMUSG00000051344
Hist2h2aa2	1.13152e-06	0.0208574	0.158	0.105	0.0227299	ENSMUSG00000063954
Dynlt1c	1.14183e-06	0.0469774	0.429	0.335	0.0229371	ENSMUSG00000000579
Dda1	1.15024e-06	0.0567557	0.248	0.176	0.0231061	ENSMUSG00000074247
Dusp1	1.15169e-06	0.0476891	0.135	0.086	0.0231352	ENSMUSG00000024190
Bach2	1.22741e-06	0.0294888	0.043	0.018	0.0246562	ENSMUSG00000040270
Elp2	1.23783e-06	0.0489996	0.181	0.123	0.0248655	ENSMUSG00000024271
Syvn1	1.24622e-06	0.0498566	0.183	0.124	0.0250342	ENSMUSG00000024807
Apip	1.26932e-06	0.0481428	0.235	0.165	0.025498	ENSMUSG00000010911
Atg101	1.27485e-06	0.0410951	0.075	0.041	0.0256091	ENSMUSG00000037204
Aco1	1.27675e-06	0.0422245	0.188	0.126	0.0256474	ENSMUSG00000028405
Cdk6	1.28742e-06	0.0458247	0.167	0.112	0.0258618	ENSMUSG00000040274
Plin3	1.29377e-06	0.0473084	0.178	0.12	0.0259892	ENSMUSG00000024197
Rpp21	1.30598e-06	0.0535651	0.192	0.132	0.0262346	ENSMUSG00000024446
Lama5	1.31597e-06	0.0394921	0.056	0.027	0.0264352	ENSMUSG00000015647
Men1	1.32209e-06	0.0416988	0.126	0.079	0.0265581	ENSMUSG00000024947
Eef2	1.32287e-06	-0.0823325	0.612	0.575	0.0265739	ENSMUSG00000034994
Rgcc	1.3469e-06	0.0882218	0.597	0.459	0.0270566	ENSMUSG00000022018
Slc7a6	1.34963e-06	0.0458381	0.124	0.078	0.0271114	ENSMUSG00000031904
Pkm	1.35012e-06	0.0457161	0.252	0.178	0.0271213	ENSMUSG00000032294
Adgra3	1.37694e-06	0.0433838	0.15	0.098	0.0276599	ENSMUSG00000029090
Cxx1b	1.39157e-06	0.0719863	0.461	0.37	0.0279538	ENSMUSG00000067924
Igsf10	1.39376e-06	-0.138927	0.221	0.257	0.0279978	ENSMUSG00000036334
Hunk	1.39723e-06	0.0313525	0.058	0.028	0.0280676	ENSMUSG00000053414
Ptms	1.40404e-06	-0.0289118	0.904	0.85	0.0282044	ENSMUSG00000030122
Itga11	1.41675e-06	0.0489942	0.25	0.176	0.0284597	ENSMUSG00000032243
Daam2	1.42258e-06	0.0476758	0.256	0.181	0.0285768	ENSMUSG00000040260
P3h1	1.43071e-06	0.0442195	0.171	0.114	0.0287402	ENSMUSG00000028641
Nkd2	1.43776e-06	0.0443345	0.16	0.106	0.0288818	ENSMUSG00000021567
Elf1	1.44267e-06	-0.138271	0.241	0.274	0.0289803	ENSMUSG00000036461
Taf9	1.4442e-06	0.0312153	0.209	0.146	0.0290111	ENSMUSG00000052293
Itih5	1.45029e-06	0.0983519	0.633	0.52	0.0291335	ENSMUSG00000025780
Il15	1.49283e-06	0.0531656	0.2	0.139	0.029988	ENSMUSG00000031712
Rtcb	1.51025e-06	0.0443515	0.186	0.126	0.0303379	ENSMUSG00000001783
Hist2h2aa1	1.5202e-06	0.0215471	0.16	0.107	0.0305378	ENSMUSG00000064220
Pmpca	1.5615e-06	0.0382432	0.091	0.053	0.0313674	ENSMUSG00000026926
Slc25a20	1.59269e-06	0.0378721	0.119	0.074	0.0319939	ENSMUSG00000032602
Ap1b1	1.62222e-06	0.0431306	0.088	0.051	0.0325871	ENSMUSG00000009090
Tmie	1.64666e-06	0.030697	0.025	0.007	0.0330781	ENSMUSG00000049555
H2afj	1.65318e-06	0.0485676	0.267	0.19	0.0332091	ENSMUSG00000060032
P4hb	1.65445e-06	-0.0279384	0.83	0.751	0.0332345	ENSMUSG00000025130
Washc4	1.65597e-06	-0.148256	0.249	0.291	0.0332651	ENSMUSG00000034560
Gm12918	1.65641e-06	-0.10612	0.355	0.409	0.0332739	ENSMUSG00000066315
Rpl10-ps3	1.70212e-06	-0.0524032	0.893	0.846	0.0341922	ENSMUSG00000058443
Syngr2	1.72401e-06	0.0439204	0.213	0.148	0.0346319	ENSMUSG00000048277
Gm11808	1.7393e-06	-0.0673548	0.857	0.824	0.034939	ENSMUSG00000068240
Agrn	1.75468e-06	0.0408244	0.142	0.092	0.0352481	ENSMUSG00000041936
Napepld	1.81217e-06	0.0357868	0.047	0.021	0.0364028	ENSMUSG00000044968
Fuca1	1.82254e-06	0.0719884	0.469	0.351	0.0366111	ENSMUSG00000028673
Mgat1	1.82617e-06	0.0392705	0.263	0.184	0.0366842	ENSMUSG00000020346
Mafg	1.83849e-06	0.0441875	0.181	0.124	0.0369317	ENSMUSG00000051510
Coro1b	1.83885e-06	0.0294666	0.283	0.203	0.0369388	ENSMUSG00000024835
Psmf1	1.86404e-06	0.0452012	0.142	0.093	0.0374449	ENSMUSG00000032869
Hdc	1.86708e-06	-0.0253216	0.002	0.013	0.0375059	ENSMUSG00000027360
Arnt2	1.87895e-06	0.0263477	0.036	0.014	0.0377443	ENSMUSG00000015709
Prkd1	1.88426e-06	0.0270323	0.034	0.012	0.037851	ENSMUSG00000002688
Atp1a1	1.8886e-06	0.0666018	0.445	0.329	0.0379383	ENSMUSG00000033161
Grb14	1.89828e-06	0.0417483	0.182	0.123	0.0381326	ENSMUSG00000026888
Fbxo18	1.90295e-06	0.0444141	0.109	0.067	0.0382265	ENSMUSG00000058594
Loxl3	1.91587e-06	0.053615	0.325	0.237	0.0384859	ENSMUSG00000000693
Ubald1	1.9255e-06	0.0496851	0.216	0.151	0.0386794	ENSMUSG00000039568
Hrct1	1.947e-06	0.0313202	0.046	0.021	0.0391114	ENSMUSG00000071001
Rbfox2	1.95713e-06	0.0566599	0.336	0.247	0.0393149	ENSMUSG00000033565
Def8	1.96441e-06	0.0426326	0.109	0.067	0.0394611	ENSMUSG00000001482
Crat	1.96688e-06	0.0349002	0.093	0.055	0.0395108	ENSMUSG00000026853
Trappc10	1.99254e-06	0.052614	0.213	0.15	0.0400262	ENSMUSG00000000374
Rpl30	1.99264e-06	-0.0966661	0.786	0.752	0.0400281	ENSMUSG00000058600
Sord	2.02689e-06	0.0365364	0.079	0.044	0.0407162	ENSMUSG00000027227
Hmgcs2	2.03708e-06	0.0373225	0.084	0.047	0.0409209	ENSMUSG00000027875
Hsdl2	2.06794e-06	0.0463136	0.165	0.112	0.0415408	ENSMUSG00000028383
Rpl41	2.06935e-06	-0.0461609	0.969	0.953	0.0415691	ENSMUSG00000093674
Cd200	2.08575e-06	-0.131935	0.216	0.253	0.0418986	ENSMUSG00000022661
B4galt7	2.16543e-06	0.0420631	0.122	0.077	0.0434992	ENSMUSG00000021504
Repin1	2.20363e-06	0.0357432	0.111	0.068	0.0442664	ENSMUSG00000052751
Aes	2.23078e-06	0.100999	0.664	0.504	0.044812	ENSMUSG00000054452
Sntb1	2.23659e-06	0.0394396	0.1	0.06	0.0449286	ENSMUSG00000060429
Arrb1	2.25666e-06	0.0421344	0.185	0.126	0.0453318	ENSMUSG00000018909
Pgls	2.26631e-06	0.044338	0.24	0.169	0.0455257	ENSMUSG00000031807
Pgp	2.30309e-06	0.035565	0.118	0.073	0.0462645	ENSMUSG00000043445
Pigs	2.31675e-06	0.0457568	0.158	0.107	0.0465388	ENSMUSG00000041958
Plin2	2.34005e-06	0.0380742	0.075	0.041	0.047007	ENSMUSG00000028494
Mylip	2.34881e-06	-0.137131	0.192	0.23	0.047183	ENSMUSG00000038175
Gps1	2.3869e-06	0.0513405	0.234	0.167	0.0479481	ENSMUSG00000025156
Nmt1	2.41264e-06	0.0487124	0.258	0.185	0.0484651	ENSMUSG00000020936
0610012G03Rik	2.46675e-06	0.0488243	0.272	0.197	0.049552	ENSMUSG00000107002
Pitpnc1	2.49056e-06	0.0551347	0.147	0.098	0.0500304	ENSMUSG00000040430
Surf4	2.51429e-06	0.0675222	0.443	0.327	0.050507	ENSMUSG00000014867
Vps25	2.51602e-06	0.0258399	0.306	0.22	0.0505419	ENSMUSG00000078656
Txndc5	2.53853e-06	0.0702436	0.471	0.355	0.0509941	ENSMUSG00000038991
Uqcr11	2.57735e-06	0.053985	0.333	0.243	0.0517737	ENSMUSG00000020163
Hmox2	2.60222e-06	0.0471036	0.208	0.144	0.0522734	ENSMUSG00000004070
Mrpl41	2.616e-06	0.0385494	0.154	0.102	0.0525503	ENSMUSG00000036850
Gstm2	2.64243e-06	-0.0764444	0.623	0.587	0.053081	ENSMUSG00000040562
Rfng	2.68166e-06	0.0354891	0.151	0.099	0.0538692	ENSMUSG00000025158
Akap12	2.76249e-06	-0.105262	0.521	0.506	0.0554929	ENSMUSG00000038587
Fdx1	2.76757e-06	0.0493836	0.239	0.17	0.0555949	ENSMUSG00000032051
7530428D23Rik	2.77143e-06	0.067213	0.263	0.193	0.0556725	ENSMUSG00000103441
Gm8355	2.7789e-06	-0.126527	0.416	0.431	0.0558226	ENSMUSG00000093798
Eif4a2	2.81077e-06	-0.0932667	0.55	0.523	0.0564627	ENSMUSG00000022884
Col4a1	2.83084e-06	-0.0153265	0.956	0.895	0.0568658	ENSMUSG00000031502
Sertad1	2.85368e-06	0.0389372	0.059	0.03	0.0573247	ENSMUSG00000008384
Emc1	3.10201e-06	0.0467652	0.141	0.092	0.0623132	ENSMUSG00000078517
Pold4	3.18133e-06	0.0447218	0.14	0.092	0.0639066	ENSMUSG00000024854
Prdx3	3.22212e-06	0.0400683	0.13	0.085	0.0647259	ENSMUSG00000024997
Eif4ebp1	3.25312e-06	0.0510394	0.186	0.13	0.0653486	ENSMUSG00000031490
Wnt11	3.26567e-06	0.0300555	0.036	0.014	0.0656009	ENSMUSG00000015957
Cox17	3.27188e-06	0.0477025	0.368	0.282	0.0657255	ENSMUSG00000046516
Tns3	3.27199e-06	-0.0574538	0.68	0.624	0.0657277	ENSMUSG00000020422
Rab7	3.35049e-06	-0.0589711	0.685	0.632	0.0673046	ENSMUSG00000079477
Ikbke	3.35657e-06	0.0293365	0.043	0.019	0.0674267	ENSMUSG00000042349
Ndufa8	3.40739e-06	0.0401395	0.221	0.154	0.0684476	ENSMUSG00000026895
Ccdc113	3.4704e-06	-0.047831	0.017	0.037	0.0697133	ENSMUSG00000036598
Nrg2	3.48197e-06	0.03003	0.043	0.019	0.0699457	ENSMUSG00000060275
Gnaq	3.62141e-06	0.0605763	0.375	0.277	0.072747	ENSMUSG00000024639
Pisd	3.65758e-06	0.0298056	0.132	0.085	0.0734735	ENSMUSG00000023452
Pcm1	3.70113e-06	-0.132551	0.179	0.216	0.0743483	ENSMUSG00000031592
Rplp2	3.72169e-06	-0.0682924	0.79	0.735	0.0747613	ENSMUSG00000025508
Polr2l	3.72987e-06	0.0248587	0.19	0.132	0.0749257	ENSMUSG00000038489
Cxcl13	3.73406e-06	0.0436307	0.037	0.015	0.0750098	ENSMUSG00000023078
Psd4	3.75441e-06	0.0421546	0.075	0.042	0.0754186	ENSMUSG00000026979
Polr2g	3.78376e-06	0.0462579	0.232	0.166	0.0760082	ENSMUSG00000071662
Arxes2	3.78675e-06	0.0298528	0.031	0.011	0.0760681	ENSMUSG00000048040
Map2k2	3.79992e-06	0.0383551	0.129	0.084	0.0763327	ENSMUSG00000035027
Smarcc2	3.80323e-06	-0.114402	0.43	0.436	0.0763993	ENSMUSG00000025369
Aurkaip1	3.80941e-06	0.0452108	0.208	0.146	0.0765234	ENSMUSG00000065990
Smagp	3.8396e-06	0.0391983	0.132	0.086	0.0771299	ENSMUSG00000053559
Cycs	3.87541e-06	0.0242417	0.249	0.181	0.0778492	ENSMUSG00000063694
Cbx3-ps6	3.88838e-06	-0.0340386	0.029	0.055	0.0781097	ENSMUSG00000057886
Lpp	4.08059e-06	-0.0857837	0.588	0.552	0.081971	ENSMUSG00000033306
Emp3	4.11038e-06	0.0784543	0.513	0.394	0.0825693	ENSMUSG00000040212
Ivns1abp	4.17138e-06	0.042911	0.135	0.088	0.0837947	ENSMUSG00000023150
Mgat4b	4.20143e-06	0.0452196	0.168	0.115	0.0843983	ENSMUSG00000036620
Rpl27	4.20754e-06	0.0450851	0.502	0.409	0.084521	ENSMUSG00000063316
Apln	4.21594e-06	0.0245392	0.019	0.004	0.0846898	ENSMUSG00000037010
Ifit1	4.2377e-06	0.0510936	0.165	0.114	0.085127	ENSMUSG00000034459
Robo2	4.24334e-06	-0.0328985	0.007	0.021	0.0852403	ENSMUSG00000052516
Gyg	4.28267e-06	0.0338518	0.065	0.034	0.0860304	ENSMUSG00000019528
Kifc3	4.30373e-06	0.0349521	0.05	0.024	0.0864533	ENSMUSG00000031788
Atp6v1h	4.34418e-06	0.0430085	0.186	0.129	0.087266	ENSMUSG00000033793
Dusp23	4.35148e-06	0.043139	0.158	0.107	0.0874125	ENSMUSG00000026544
Ddah2	4.3728e-06	0.0415632	0.206	0.144	0.0878408	ENSMUSG00000007039
Rps13-ps2	4.40113e-06	-0.110277	0.429	0.472	0.0884098	ENSMUSG00000069972
St6galnac6	4.4111e-06	0.0436506	0.216	0.153	0.0886102	ENSMUSG00000026811
Afap1	4.50069e-06	0.0405224	0.168	0.114	0.0904098	ENSMUSG00000029094
Ppp3ca	4.51245e-06	0.0663314	0.403	0.308	0.0906461	ENSMUSG00000028161
Cd93	4.52532e-06	-0.0901542	0.067	0.1	0.0909045	ENSMUSG00000027435
Alg3	4.52838e-06	0.0260959	0.076	0.043	0.0909662	ENSMUSG00000033809
Tnfrsf11b	4.54106e-06	0.0228865	0.031	0.011	0.0912209	ENSMUSG00000063727
Taf5l	4.60192e-06	0.0346983	0.076	0.043	0.0924433	ENSMUSG00000038697
Notch2	4.64787e-06	0.0541856	0.329	0.242	0.0933665	ENSMUSG00000027878
Trim47	4.6627e-06	0.0425512	0.108	0.067	0.0936643	ENSMUSG00000020773
Evc2	4.68637e-06	0.045673	0.127	0.083	0.0941399	ENSMUSG00000050248
Triap1	4.73135e-06	0.0376778	0.153	0.102	0.0950433	ENSMUSG00000029535
Washc5	4.73641e-06	0.042302	0.158	0.107	0.0951449	ENSMUSG00000022350
Gstp2	4.76132e-06	0.0630525	0.73	0.604	0.0956455	ENSMUSG00000038155
Fam20c	4.87209e-06	0.0273296	0.028	0.009	0.0978706	ENSMUSG00000025854
Tap2	4.87964e-06	0.0592078	0.328	0.245	0.0980223	ENSMUSG00000024339
Ftl1	4.8893e-06	-0.0187051	0.995	0.987	0.0982164	ENSMUSG00000050708
Snx11	4.8924e-06	0.0369158	0.124	0.08	0.0982785	ENSMUSG00000020876
Nfib	4.93328e-06	-0.0874514	0.597	0.565	0.0990997	ENSMUSG00000008575
Gm5879	5.00832e-06	-0.0389318	0.082	0.117	0.100607	ENSMUSG00000068262
Shc1	5.01517e-06	0.0699364	0.491	0.372	0.100745	ENSMUSG00000042626
Uqcrq	5.01989e-06	0.0595236	0.38	0.284	0.10084	ENSMUSG00000044894
Top2a	5.036e-06	-0.041543	0.011	0.028	0.101163	ENSMUSG00000020914
Sil1	5.05922e-06	0.0370989	0.211	0.147	0.10163	ENSMUSG00000024357
Pip4k2a	5.11018e-06	-0.128756	0.18	0.216	0.102653	ENSMUSG00000026737
Ndnf	5.14057e-06	0.0460647	0.164	0.113	0.103264	ENSMUSG00000049001
Mrpl43	5.14059e-06	0.0421186	0.195	0.136	0.103264	ENSMUSG00000025208
Tmem62	5.24621e-06	0.0381902	0.102	0.063	0.105386	ENSMUSG00000054484
Rps6ka3	5.2489e-06	0.0400027	0.246	0.175	0.10544	ENSMUSG00000031309
Trpa1	5.25711e-06	0.026781	0.035	0.014	0.105605	ENSMUSG00000032769
Hdac3	5.32118e-06	0.0352837	0.176	0.12	0.106892	ENSMUSG00000024454
Tgfbrap1	5.33664e-06	0.0328363	0.076	0.043	0.107202	ENSMUSG00000070939
Bclaf1	5.34573e-06	-0.130943	0.291	0.32	0.107385	ENSMUSG00000037608
Ccl3	5.39665e-06	-0.0179779	0	0.008	0.108408	ENSMUSG00000000982
Cracr2b	5.44413e-06	0.0184894	0.025	0.007	0.109362	ENSMUSG00000048200
Micall2	5.56913e-06	0.0301907	0.059	0.03	0.111873	ENSMUSG00000036718
Rsph3a	5.59603e-06	0.0248522	0.098	0.06	0.112413	ENSMUSG00000073471
Plcd1	5.60743e-06	0.0374147	0.079	0.046	0.112642	ENSMUSG00000010660
Atg13	5.67395e-06	0.0398213	0.111	0.07	0.113978	ENSMUSG00000027244
Lrp10	5.67941e-06	0.0446298	0.134	0.089	0.114088	ENSMUSG00000022175
2002-03-01	5.69675e-06	0.0457603	0.261	0.188	0.114436	ENSMUSG00000073481
Tfrc	5.71922e-06	-0.0294707	0.004	0.017	0.114888	ENSMUSG00000022797
Raly	5.72586e-06	0.04061	0.221	0.157	0.115021	ENSMUSG00000027593
Gm11353	5.8077e-06	-0.0495122	0.123	0.166	0.116665	ENSMUSG00000060198
Ddx6	5.82381e-06	-0.108965	0.468	0.463	0.116989	ENSMUSG00000032097
H3f3a-ps2	5.91223e-06	-0.0141352	0.011	0.029	0.118765	ENSMUSG00000081176
Rmnd5b	5.97066e-06	0.0293491	0.113	0.071	0.119939	ENSMUSG00000001054
Src	6.1543e-06	0.0398491	0.135	0.089	0.123628	ENSMUSG00000027646
Entpd4	6.19094e-06	0.042165	0.229	0.163	0.124364	ENSMUSG00000095463
Ptpn11	6.2352e-06	0.0400346	0.259	0.187	0.125253	ENSMUSG00000043733
Rpl36al	6.33702e-06	0.0311098	0.422	0.322	0.127298	ENSMUSG00000049751
Zbtb20	6.38411e-06	-0.0769322	0.647	0.608	0.128244	ENSMUSG00000022708
Cbx3-ps7	6.48436e-06	-0.0315911	0.028	0.053	0.130258	ENSMUSG00000059647
Trim30a	6.51494e-06	0.0339842	0.069	0.038	0.130872	ENSMUSG00000030921
Cfb	6.66644e-06	0.0747827	0.505	0.415	0.133915	ENSMUSG00000090231
Tnk2	6.7164e-06	0.0314136	0.073	0.041	0.134919	ENSMUSG00000022791
Sned1	6.72314e-06	-0.133163	0.306	0.335	0.135054	ENSMUSG00000047793
H3f3a-ps1	6.73275e-06	-0.00951399	0.006	0.02	0.135247	ENSMUSG00000082284
Ndufa10	6.73899e-06	0.0485252	0.296	0.216	0.135373	ENSMUSG00000026260
Ctsb	6.88738e-06	-0.0121988	0.96	0.908	0.138354	ENSMUSG00000021939
Isg15	6.93041e-06	0.051895	0.146	0.099	0.139218	ENSMUSG00000035692
Smap1	6.93569e-06	0.0476437	0.335	0.246	0.139324	ENSMUSG00000026155
Ppp1r2	6.95394e-06	-0.127457	0.374	0.394	0.139691	ENSMUSG00000047714
Col9a2	7.06408e-06	0.0436656	0.079	0.046	0.141903	ENSMUSG00000028626
Yipf3	7.08042e-06	0.038961	0.233	0.165	0.142232	ENSMUSG00000071074
Ercc4	7.15123e-06	0.0258883	0.045	0.021	0.143654	ENSMUSG00000022545
Smad6	7.15765e-06	0.0426914	0.224	0.159	0.143783	ENSMUSG00000036867
AC164623.1	7.18991e-06	-0.0196838	0.001	0.01	0.144431	ENSMUSG00000112907
Acot7	7.21729e-06	0.0293899	0.053	0.027	0.144981	ENSMUSG00000028937
Zbtb8os	7.24103e-06	0.0302947	0.143	0.095	0.145458	ENSMUSG00000057572
Clptm1	7.25182e-06	0.0466816	0.251	0.182	0.145675	ENSMUSG00000002981
Dgcr2	7.2613e-06	0.0480999	0.34	0.251	0.145865	ENSMUSG00000003166
Rassf1	7.32722e-06	0.0337979	0.185	0.128	0.147189	ENSMUSG00000010067
Etnk1	7.40839e-06	-0.129677	0.388	0.391	0.14882	ENSMUSG00000030275
Dnajb11	7.45301e-06	0.0460764	0.293	0.215	0.149716	ENSMUSG00000004460
P4ha2	7.51642e-06	0.035472	0.075	0.043	0.15099	ENSMUSG00000018906
2310057M21Rik	7.61282e-06	0.0302355	0.056	0.029	0.152926	ENSMUSG00000040177
Lamc1	7.64161e-06	0.104733	0.805	0.648	0.153505	ENSMUSG00000026478
Prkcsh	7.64919e-06	0.0453599	0.272	0.199	0.153657	ENSMUSG00000003402
Sft2d2	7.72699e-06	0.0299601	0.04	0.018	0.15522	ENSMUSG00000040848
Slc22a8	7.72723e-06	0.0341274	0.037	0.016	0.155225	ENSMUSG00000063796
Pex2	7.77587e-06	0.0452175	0.231	0.167	0.156202	ENSMUSG00000040374
Ipo9	7.85898e-06	0.0400867	0.219	0.156	0.157871	ENSMUSG00000041879
S100a1	7.89475e-06	0.048783	0.319	0.238	0.15859	ENSMUSG00000044080
Isoc2a	7.91428e-06	0.0364317	0.079	0.046	0.158982	ENSMUSG00000086784
Ak6	8.25242e-06	0.0210952	0.254	0.186	0.165775	ENSMUSG00000078941
Ephb4	8.33044e-06	0.0333188	0.164	0.112	0.167342	ENSMUSG00000029710
Cmbl	8.48509e-06	0.0406551	0.098	0.061	0.170449	ENSMUSG00000022235
Enpp3	8.52303e-06	-0.120493	0.172	0.21	0.171211	ENSMUSG00000019989
Slc25a23	8.57847e-06	0.0366112	0.071	0.04	0.172324	ENSMUSG00000046329
Rpl22	8.5872e-06	-0.0813173	0.592	0.563	0.1725	ENSMUSG00000028936
Csde1	8.60232e-06	-0.0964326	0.528	0.508	0.172803	ENSMUSG00000068823
Hic1	8.60309e-06	0.0394835	0.147	0.099	0.172819	ENSMUSG00000043099
Samhd1	8.61329e-06	-0.018462	0.892	0.824	0.173024	ENSMUSG00000027639
Haus3	8.71816e-06	0.0438449	0.128	0.085	0.17513	ENSMUSG00000079555
Calu	8.84664e-06	-0.0191183	0.923	0.871	0.177711	ENSMUSG00000029767
Tom1l2	8.97041e-06	0.0405755	0.122	0.08	0.180198	ENSMUSG00000000538
Dbnl	9.1784e-06	0.0330299	0.142	0.094	0.184376	ENSMUSG00000020476
Dstn	9.4903e-06	0.0991015	0.697	0.544	0.190641	ENSMUSG00000015932
Tmem203	9.61369e-06	0.0360636	0.092	0.056	0.19312	ENSMUSG00000078201
Unc50	9.62944e-06	0.0480964	0.314	0.233	0.193436	ENSMUSG00000026111
Ercc3	9.65365e-06	0.0320428	0.159	0.108	0.193923	ENSMUSG00000024382
Hsd17b7	9.67963e-06	0.0408688	0.175	0.122	0.194444	ENSMUSG00000026675
Fat1	9.75723e-06	0.0639157	0.455	0.347	0.196003	ENSMUSG00000070047
Ppdpf	9.81254e-06	0.0406963	0.224	0.16	0.197114	ENSMUSG00000016344
Psmd2	9.84529e-06	0.0425036	0.256	0.187	0.197772	ENSMUSG00000006998
Ube2z	9.91764e-06	0.0401437	0.186	0.13	0.199226	ENSMUSG00000014349
Adipor1	9.91946e-06	0.0428477	0.266	0.193	0.199262	ENSMUSG00000026457
Ttc28	9.94763e-06	0.0464468	0.308	0.226	0.199828	ENSMUSG00000033209
Tpra1	1.00148e-05	0.0398018	0.289	0.21	0.201177	ENSMUSG00000002871
Crim1	1.00624e-05	-0.125811	0.399	0.402	0.202134	ENSMUSG00000024074
Dock1	1.0108e-05	0.0357225	0.187	0.131	0.20305	ENSMUSG00000058325
Vegfb	1.0133e-05	0.0370924	0.186	0.13	0.203553	ENSMUSG00000024962
Nat6	1.0143e-05	0.0344942	0.172	0.12	0.203753	ENSMUSG00000079334
Mrps30	1.01774e-05	0.0290259	0.124	0.08	0.204443	ENSMUSG00000021731
Lnpep	1.02205e-05	-0.123072	0.337	0.353	0.205309	ENSMUSG00000023845
Rpl32	1.02618e-05	-0.0762039	0.678	0.627	0.206139	ENSMUSG00000057841
Etfdh	1.03796e-05	0.0340966	0.197	0.138	0.208506	ENSMUSG00000027809
Tmppe	1.03833e-05	-0.0131364	0	0.006	0.208579	ENSMUSG00000079260
Bglap2	1.04216e-05	0.0318611	0.154	0.107	0.209349	ENSMUSG00000074486
Rab29	1.04766e-05	0.0326928	0.087	0.053	0.210455	ENSMUSG00000026433
Sh3pxd2b	1.06198e-05	0.0330482	0.164	0.113	0.213331	ENSMUSG00000040711
Ppp4c	1.06756e-05	0.0417555	0.288	0.211	0.214451	ENSMUSG00000030697
Dap	1.07628e-05	0.0660623	0.447	0.342	0.216202	ENSMUSG00000039168
Srp68	1.08469e-05	0.039166	0.148	0.1	0.217892	ENSMUSG00000020780
Il20rb	1.09069e-05	-0.0191909	0.002	0.011	0.219098	ENSMUSG00000044244
Slc25a5	1.10372e-05	0.0789424	0.573	0.446	0.221715	ENSMUSG00000016319
Trib1	1.10771e-05	-0.0800848	0.051	0.08	0.222517	ENSMUSG00000032501
Usb1	1.10983e-05	0.0304176	0.054	0.028	0.222943	ENSMUSG00000031792
Palmd	1.11363e-05	0.0229003	0.029	0.01	0.223707	ENSMUSG00000033377
Arf3	1.12847e-05	0.0421867	0.255	0.185	0.226686	ENSMUSG00000051853
Pdgfrb	1.12913e-05	-0.0642253	0.645	0.597	0.22682	ENSMUSG00000024620
Edar	1.13684e-05	0.0404036	0.208	0.148	0.228368	ENSMUSG00000003227
Ftl1-ps1	1.1495e-05	-0.0723978	0.23	0.283	0.230911	ENSMUSG00000062382
Abhd2	1.15268e-05	0.0370626	0.191	0.135	0.23155	ENSMUSG00000039202
Svbp	1.16309e-05	0.0371902	0.18	0.126	0.233641	ENSMUSG00000028643
Cpa3	1.1718e-05	-0.0142833	0	0.007	0.235391	ENSMUSG00000001865
Lzts2	1.18203e-05	0.0346017	0.147	0.099	0.237446	ENSMUSG00000035342
Srprb	1.20224e-05	0.0361219	0.111	0.071	0.241506	ENSMUSG00000032553
Msmo1	1.20338e-05	0.0362453	0.069	0.039	0.241735	ENSMUSG00000031604
Pafah1b1	1.21175e-05	-0.100485	0.497	0.477	0.243415	ENSMUSG00000020745
Pdcd6	1.21545e-05	0.042292	0.294	0.217	0.244159	ENSMUSG00000021576
Xpnpep1	1.22048e-05	0.038282	0.174	0.123	0.24517	ENSMUSG00000025027
3110079O15Rik	1.23887e-05	0.0223626	0.025	0.008	0.248864	ENSMUSG00000026258
Bri3	1.24761e-05	0.0426484	0.224	0.162	0.250621	ENSMUSG00000047843
Psmc4	1.25198e-05	0.0379141	0.197	0.139	0.251498	ENSMUSG00000030603
Hist1h2aj	1.29568e-05	-0.00753585	0.012	0.029	0.260276	ENSMUSG00000080076
Susd1	1.3057e-05	-0.0311826	0.007	0.02	0.262289	ENSMUSG00000038578
Epb41l5	1.32062e-05	0.0337561	0.113	0.073	0.265286	ENSMUSG00000026383
Mkl1	1.32169e-05	0.0254693	0.066	0.036	0.265501	ENSMUSG00000042292
Scap	1.33587e-05	0.0368233	0.126	0.083	0.268351	ENSMUSG00000032485
Fhl3	1.3424e-05	0.0253269	0.026	0.009	0.269662	ENSMUSG00000032643
Tmbim6	1.34522e-05	-0.0116881	0.973	0.925	0.270229	ENSMUSG00000023010
Socs2	1.35312e-05	-0.130177	0.313	0.339	0.271814	ENSMUSG00000020027
P2rx4	1.3593e-05	0.0472116	0.277	0.204	0.273056	ENSMUSG00000029470
Itga9	1.36906e-05	-0.131637	0.289	0.311	0.275018	ENSMUSG00000039115
Tfdp1	1.3997e-05	0.0309988	0.172	0.119	0.281172	ENSMUSG00000038482
Rasa4	1.4034e-05	0.0312313	0.084	0.05	0.281914	ENSMUSG00000004952
Luc7l3	1.43527e-05	-0.123947	0.317	0.341	0.288317	ENSMUSG00000020863
Frmd8	1.43604e-05	0.0354053	0.079	0.047	0.288472	ENSMUSG00000024816
Sidt2	1.43646e-05	0.0485937	0.315	0.234	0.288556	ENSMUSG00000034908
Pip5k1a	1.45732e-05	0.0395668	0.148	0.102	0.292747	ENSMUSG00000028126
D030025P21Rik	1.46494e-05	0.0248571	0.034	0.014	0.294276	ENSMUSG00000092130
Decr1	1.46706e-05	0.0343289	0.161	0.111	0.294704	ENSMUSG00000028223
Gm14414	1.47596e-05	-0.0451104	0.119	0.159	0.29649	ENSMUSG00000083619
Arpc3	1.485e-05	0.0390812	0.261	0.19	0.298307	ENSMUSG00000029465
Tspan9	1.48993e-05	0.0322723	0.11	0.07	0.299297	ENSMUSG00000030352
Atp6v1f	1.51039e-05	0.0379223	0.271	0.198	0.303408	ENSMUSG00000004285
Tgfbr2	1.53667e-05	0.0652697	0.444	0.336	0.308685	ENSMUSG00000032440
Hapln1	1.53679e-05	0.0364211	0.063	0.035	0.30871	ENSMUSG00000021613
Wdyhv1	1.53947e-05	0.0288956	0.057	0.03	0.309248	ENSMUSG00000022359
Ptch2	1.54112e-05	0.0233258	0.031	0.012	0.30958	ENSMUSG00000028681
Rnaset2b	1.54735e-05	0.076358	0.694	0.597	0.310832	ENSMUSG00000094724
Ermap	1.55102e-05	-0.0204565	0.002	0.011	0.311569	ENSMUSG00000028644
Pnpo	1.56116e-05	0.0240003	0.034	0.014	0.313607	ENSMUSG00000018659
Tgif1	1.56174e-05	0.0398646	0.121	0.08	0.313721	ENSMUSG00000047407
Psmb7	1.56657e-05	0.032949	0.236	0.17	0.314692	ENSMUSG00000026750
Cuedc1	1.56834e-05	0.0321833	0.186	0.131	0.315049	ENSMUSG00000018378
Myadm	1.57219e-05	0.0991477	0.775	0.627	0.315822	ENSMUSG00000068566
Arf5	1.59097e-05	0.0481345	0.375	0.278	0.319593	ENSMUSG00000020440
Pex14	1.59869e-05	0.0404821	0.185	0.131	0.321144	ENSMUSG00000028975
Smim1	1.62669e-05	0.0430653	0.118	0.078	0.326769	ENSMUSG00000078350
Inpp4b	1.64278e-05	-0.0458038	0.025	0.047	0.330003	ENSMUSG00000037940
Sdcbp	1.64662e-05	0.0617877	0.459	0.344	0.330773	ENSMUSG00000028249
Rps27l	1.6541e-05	0.0481027	0.275	0.205	0.332276	ENSMUSG00000036781
2900097C17Rik	1.65508e-05	-0.0860499	0.567	0.522	0.332472	ENSMUSG00000102869
Ap5s1	1.66095e-05	0.0343247	0.051	0.027	0.333653	ENSMUSG00000068264
Rbm15b	1.66965e-05	0.0334553	0.112	0.073	0.3354	ENSMUSG00000074102
Fam198a	1.67663e-05	0.0200022	0.016	0.003	0.336801	ENSMUSG00000038233
Cog4	1.68674e-05	0.0333134	0.133	0.089	0.338832	ENSMUSG00000031753
Adipor2	1.69608e-05	0.0674532	0.482	0.369	0.340708	ENSMUSG00000030168
Clic1	1.69676e-05	0.0414332	0.265	0.195	0.340845	ENSMUSG00000007041
Kcnc3	1.70926e-05	0.0183829	0.013	0.001	0.343357	ENSMUSG00000062785
Gm5321	1.71024e-05	0.0170718	0.013	0.001	0.343553	ENSMUSG00000064231
Nfkb1	1.7184e-05	0.0362784	0.236	0.171	0.345193	ENSMUSG00000028163
Rai1	1.72715e-05	0.0412246	0.154	0.107	0.346949	ENSMUSG00000062115
Becn1	1.72725e-05	0.0384187	0.178	0.125	0.34697	ENSMUSG00000035086
Aldh3a2	1.76962e-05	0.0377324	0.224	0.161	0.355481	ENSMUSG00000010025
Bmp5	1.77186e-05	-0.100356	0.495	0.482	0.355931	ENSMUSG00000032179
Asb8	1.78262e-05	0.0336865	0.108	0.07	0.358093	ENSMUSG00000048175
Slc43a3	1.82512e-05	0.0459788	0.16	0.113	0.366629	ENSMUSG00000027074
Rgs3	1.82865e-05	0.0437161	0.318	0.236	0.36734	ENSMUSG00000059810
Pdhb	1.82949e-05	0.0415851	0.196	0.141	0.367508	ENSMUSG00000021748
Prr7	1.82949e-05	0.0270017	0.041	0.019	0.367508	ENSMUSG00000034686
Adam15	1.86436e-05	0.0425665	0.277	0.205	0.374513	ENSMUSG00000028041
Bak1	1.8705e-05	0.0339972	0.121	0.08	0.375746	ENSMUSG00000057789
Amdhd2	1.8744e-05	0.0289562	0.051	0.026	0.376529	ENSMUSG00000036820
1700096K18Rik	1.87992e-05	0.0300122	0.038	0.017	0.377639	ENSMUSG00000101856
Phldb2	1.88251e-05	0.0386934	0.175	0.123	0.378158	ENSMUSG00000033149
Rybp	1.89778e-05	-0.121914	0.331	0.349	0.381225	ENSMUSG00000072872
Adam17	1.91583e-05	0.0441022	0.295	0.219	0.384851	ENSMUSG00000052593
Aqp1	1.91771e-05	-0.0310498	0.004	0.016	0.385229	ENSMUSG00000004655
Azin2	1.94753e-05	0.0326062	0.074	0.043	0.39122	ENSMUSG00000028789
Pparg	1.95858e-05	0.0490663	0.346	0.263	0.39344	ENSMUSG00000000440
D1Ertd622e	1.96105e-05	0.0245277	0.065	0.036	0.393935	ENSMUSG00000044768
Paqr8	1.99843e-05	-0.103471	0.106	0.14	0.401445	ENSMUSG00000025931
Gpr107	2.01366e-05	0.0379044	0.229	0.166	0.404504	ENSMUSG00000000194
Arhgap28	2.0174e-05	0.0368392	0.117	0.077	0.405256	ENSMUSG00000024043
Klc1	2.03901e-05	0.0273585	0.159	0.109	0.409597	ENSMUSG00000021288
Gsn	2.04548e-05	0.0346415	0.179	0.127	0.410895	ENSMUSG00000026879
Rbpms2	2.04869e-05	0.0311645	0.055	0.029	0.41154	ENSMUSG00000032387
Zfyve21	2.05561e-05	0.0425737	0.278	0.204	0.412931	ENSMUSG00000021286
Srm	2.05624e-05	0.0375876	0.056	0.03	0.413057	ENSMUSG00000006442
Prrg3	2.06002e-05	0.0364391	0.111	0.072	0.413816	ENSMUSG00000033361
Gxylt2	2.06499e-05	-0.0848132	0.064	0.094	0.414815	ENSMUSG00000030074
Coq9	2.0669e-05	0.0363901	0.132	0.09	0.415198	ENSMUSG00000031782
Chkb	2.07057e-05	0.0381154	0.119	0.08	0.415937	ENSMUSG00000022617
Gm12218	2.08443e-05	-0.0577712	0.298	0.343	0.418719	ENSMUSG00000082380
Hist1h2an	2.08699e-05	-0.00724114	0.012	0.028	0.419234	ENSMUSG00000069309
Numbl	2.11162e-05	0.0389568	0.125	0.084	0.424183	ENSMUSG00000063160
Hist1h2ai	2.11714e-05	-0.00750248	0.013	0.029	0.42529	ENSMUSG00000071516
Hist1h2ah	2.11714e-05	-0.00750248	0.013	0.029	0.42529	ENSMUSG00000069302
Hist1h2ad	2.11714e-05	-0.00750248	0.013	0.029	0.42529	ENSMUSG00000071478
Tmem30a	2.15865e-05	-0.0790333	0.578	0.544	0.43363	ENSMUSG00000032328
Ppp4r3b	2.16708e-05	-0.131192	0.286	0.305	0.435324	ENSMUSG00000020463
Etf1	2.17114e-05	-0.12648	0.228	0.256	0.436139	ENSMUSG00000024360
Rps18	2.19825e-05	0.0448101	0.708	0.598	0.441584	ENSMUSG00000008668
Mta3	2.21101e-05	0.0331314	0.097	0.061	0.444148	ENSMUSG00000055817
Gm4951	2.2121e-05	-0.110522	0.431	0.427	0.444367	ENSMUSG00000073555
Atp6v0d1	2.24593e-05	0.0385679	0.191	0.137	0.451162	ENSMUSG00000013160
Cd24a	2.25332e-05	-0.0399922	0.015	0.032	0.452648	ENSMUSG00000047139
Csk	2.26411e-05	0.0382303	0.172	0.121	0.454815	ENSMUSG00000032312
Flt3l	2.27242e-05	0.0383312	0.131	0.088	0.456483	ENSMUSG00000110206
Dscr3	2.28134e-05	0.0292037	0.073	0.043	0.458276	ENSMUSG00000022898
G6pc3	2.28496e-05	0.0343016	0.166	0.115	0.459003	ENSMUSG00000034793
Rnf11	2.28522e-05	0.0389998	0.251	0.184	0.459054	ENSMUSG00000028557
Eif3b	2.31809e-05	0.0378167	0.23	0.168	0.465657	ENSMUSG00000056076
Cdc42ep5	2.33594e-05	0.0275598	0.055	0.029	0.469244	ENSMUSG00000063838
Ak5	2.34478e-05	0.0284422	0.043	0.021	0.471019	ENSMUSG00000039058
Creld1	2.34739e-05	0.0249474	0.097	0.06	0.471544	ENSMUSG00000030284
Prpf38b	2.34995e-05	-0.125359	0.262	0.288	0.472057	ENSMUSG00000027881
Has2	2.37062e-05	-0.0140253	0.001	0.008	0.476211	ENSMUSG00000022367
Lhfpl2	2.38524e-05	0.0332905	0.19	0.135	0.479147	ENSMUSG00000045312
Gm28037	2.39544e-05	-0.104452	0.514	0.501	0.481196	ENSMUSG00000098371
Sgce	2.40603e-05	-0.036708	0.743	0.68	0.483324	ENSMUSG00000004631
Psmb5	2.42399e-05	0.0264568	0.23	0.17	0.486932	ENSMUSG00000022193
Ndrg1	2.42485e-05	0.0394293	0.198	0.143	0.487104	ENSMUSG00000005125
Psen2	2.4384e-05	0.03756	0.158	0.111	0.489825	ENSMUSG00000010609
Eml1	2.4403e-05	0.029797	0.073	0.043	0.490208	ENSMUSG00000058070
52219	2.4446e-05	-0.0935968	0.305	0.343	0.491072	NA
Agtrap	2.44521e-05	0.0425201	0.299	0.222	0.491193	ENSMUSG00000029007
Pitpna	2.44599e-05	0.0405204	0.303	0.224	0.491349	ENSMUSG00000017781
Srebf2	2.44704e-05	0.0399556	0.171	0.121	0.491561	ENSMUSG00000022463
Coa3	2.46424e-05	0.0346835	0.191	0.136	0.495016	ENSMUSG00000017188
Bax	2.50391e-05	0.0430044	0.262	0.194	0.502985	ENSMUSG00000003873
Gspt2	2.5123e-05	0.025647	0.054	0.029	0.504671	ENSMUSG00000071723
Naxe	2.53642e-05	0.0363345	0.197	0.141	0.509517	ENSMUSG00000028070
Rpn1	2.5409e-05	0.0568108	0.43	0.327	0.510416	ENSMUSG00000030062
Rps12-ps4	2.56115e-05	-0.0829281	0.559	0.602	0.514483	ENSMUSG00000109509
Txn2	2.57941e-05	0.0411879	0.283	0.21	0.518153	ENSMUSG00000005354
Hk1	2.59041e-05	0.0348443	0.103	0.067	0.520362	ENSMUSG00000037012
Vcan	2.60813e-05	-0.0904637	0.084	0.116	0.523922	ENSMUSG00000021614
Cdkn1a	2.61167e-05	0.0456526	0.13	0.088	0.524633	ENSMUSG00000023067
Vhl	2.64246e-05	0.0343233	0.178	0.126	0.530817	ENSMUSG00000033933
Lsm6	2.66494e-05	0.0306334	0.221	0.159	0.535333	ENSMUSG00000031683
Slc4a7	2.67242e-05	0.0291364	0.07	0.041	0.536836	ENSMUSG00000021733
Myl6	2.68426e-05	0.0808902	0.834	0.721	0.539214	ENSMUSG00000090841
2410022M11Rik	2.69467e-05	0.0264682	0.029	0.011	0.541304	ENSMUSG00000100017
Atp6v1a	2.72207e-05	0.0423223	0.345	0.259	0.546809	ENSMUSG00000052459
Ccdc50	2.72664e-05	-0.125267	0.255	0.28	0.547727	ENSMUSG00000038127
Cep250	2.73535e-05	0.0270429	0.056	0.03	0.549477	ENSMUSG00000038241
Larp1b	2.74566e-05	0.0335035	0.079	0.048	0.551548	ENSMUSG00000025762
Gm28875	2.7547e-05	0.0278187	0.063	0.035	0.553364	ENSMUSG00000100975
Htatip2	2.7552e-05	0.0337641	0.173	0.121	0.553465	ENSMUSG00000039745
Wdr26	2.76656e-05	0.0433114	0.333	0.247	0.555747	ENSMUSG00000038733
Uqcr10	2.779e-05	0.0297707	0.233	0.168	0.558246	ENSMUSG00000059534
Aagab	2.78741e-05	0.0299182	0.088	0.054	0.559936	ENSMUSG00000037257
Sh3glb2	2.79763e-05	0.0251135	0.05	0.026	0.561988	ENSMUSG00000026860
Rpl6l	2.82587e-05	-0.108493	0.347	0.378	0.567661	ENSMUSG00000091086
Plekhb2	2.85093e-05	0.0278775	0.062	0.035	0.572696	ENSMUSG00000026123
Gdf6	2.85338e-05	0.0138691	0.009	0	0.573187	ENSMUSG00000051279
2010106E10Rik	2.85338e-05	0.0138043	0.009	0	0.573187	ENSMUSG00000025528
Tmem181b-ps	2.86976e-05	0.0245733	0.061	0.034	0.576477	ENSMUSG00000096780
Abca8a	2.87711e-05	-0.111594	0.348	0.369	0.577955	ENSMUSG00000041828
Timm29	2.87905e-05	0.0356191	0.204	0.146	0.578344	ENSMUSG00000048429
Tubb2a	2.90339e-05	0.0428973	0.219	0.162	0.583233	ENSMUSG00000058672
Pin1	2.91652e-05	0.027231	0.153	0.105	0.585871	ENSMUSG00000032171
Bloc1s6	2.9451e-05	0.0310655	0.064	0.036	0.591611	ENSMUSG00000005804
Cry2	2.9538e-05	0.0355453	0.095	0.06	0.59336	ENSMUSG00000068742
Smim4	2.97435e-05	0.0410476	0.183	0.131	0.597487	ENSMUSG00000058351
Clec2d	2.98547e-05	-0.0869166	0.602	0.577	0.599722	ENSMUSG00000030157
Htra2	3.01725e-05	0.032765	0.158	0.11	0.606105	ENSMUSG00000068329
Slc25a51	3.02064e-05	0.0382542	0.21	0.152	0.606786	ENSMUSG00000045973
Id1	3.0365e-05	0.0227935	0.052	0.027	0.609972	ENSMUSG00000042745
Tspyl3	3.04091e-05	0.0259039	0.06	0.033	0.610859	ENSMUSG00000074671
Atf2	3.08922e-05	-0.116862	0.167	0.2	0.620562	ENSMUSG00000027104
Calm1	3.10363e-05	-0.0187441	0.863	0.796	0.623456	ENSMUSG00000001175
Hdac7	3.1082e-05	0.0386658	0.19	0.136	0.624375	ENSMUSG00000022475
Arfgap1	3.17906e-05	0.0372129	0.103	0.067	0.638609	ENSMUSG00000027575
Tmem150a	3.2239e-05	0.0334205	0.119	0.08	0.647618	ENSMUSG00000055912
Emc6	3.23178e-05	0.0280359	0.173	0.121	0.649199	ENSMUSG00000047260
Cox5b	3.24073e-05	0.0300721	0.287	0.216	0.650999	ENSMUSG00000061518
Aars	3.24229e-05	0.035671	0.164	0.116	0.651312	ENSMUSG00000031960
Ebf2	3.25703e-05	-0.0789237	0.058	0.086	0.654273	ENSMUSG00000022053
Wsb2	3.26851e-05	0.0309727	0.181	0.128	0.656578	ENSMUSG00000029364
St3gal5	3.29842e-05	0.026023	0.051	0.027	0.662586	ENSMUSG00000056091
Spg7	3.30766e-05	0.0293294	0.205	0.146	0.664443	ENSMUSG00000000738
Lamtor5	3.31153e-05	0.0322755	0.168	0.117	0.665221	ENSMUSG00000087260
Usp18	3.32146e-05	0.0255135	0.042	0.02	0.667215	ENSMUSG00000030107
Nkd1	3.35692e-05	0.0291971	0.077	0.047	0.674338	ENSMUSG00000031661
Gm29253	3.4016e-05	0.0242344	0.088	0.055	0.683314	ENSMUSG00000099519
Sdf2l1	3.41e-05	0.034814	0.203	0.147	0.685002	ENSMUSG00000022769
Mydgf	3.43676e-05	0.037905	0.253	0.186	0.690376	ENSMUSG00000019579
Ywhaz	3.52356e-05	-0.0206992	0.832	0.765	0.707813	ENSMUSG00000022285
Ndufb11	3.55846e-05	0.0484769	0.414	0.315	0.714823	ENSMUSG00000031059
Gpr171	3.57022e-05	-0.0402934	0.014	0.031	0.717186	ENSMUSG00000050075
Tmem147	3.57288e-05	0.0369861	0.191	0.137	0.717719	ENSMUSG00000006315
Timm8b	3.61034e-05	0.0367821	0.116	0.077	0.725244	ENSMUSG00000039016
Ranbp9	3.63349e-05	0.0380599	0.185	0.133	0.729896	ENSMUSG00000038546
Tmem161a	3.64466e-05	0.0311087	0.082	0.05	0.732139	ENSMUSG00000002342
Ctbp1	3.6523e-05	0.036805	0.297	0.219	0.733673	ENSMUSG00000037373
Rpl3-ps2	3.66596e-05	-0.0626586	0.172	0.209	0.736417	ENSMUSG00000084131
Pgf	3.66722e-05	0.0389153	0.198	0.143	0.736671	ENSMUSG00000004791
Phldb1	3.7594e-05	0.0249867	0.056	0.03	0.755188	ENSMUSG00000048537
Smim20	3.77052e-05	0.027149	0.113	0.074	0.757422	ENSMUSG00000061461
Ssu72	3.77724e-05	0.0365765	0.155	0.109	0.758771	ENSMUSG00000029038
Myo18a	3.78028e-05	0.0415771	0.31	0.232	0.759383	ENSMUSG00000000631
Eepd1	3.85258e-05	0.0409122	0.191	0.138	0.773906	ENSMUSG00000036611
C130074G19Rik	3.85756e-05	0.0324391	0.258	0.19	0.774906	ENSMUSG00000039349
Rbms3	3.85783e-05	-0.0981211	0.523	0.497	0.774961	ENSMUSG00000039607
Gm20619	3.87283e-05	0.0229907	0.061	0.034	0.777974	ENSMUSG00000093482
Gba	3.88514e-05	0.0349678	0.159	0.112	0.780447	ENSMUSG00000028048
Rdh14	3.91608e-05	0.0294129	0.067	0.039	0.786662	ENSMUSG00000020621
Fgf13	3.92882e-05	0.0242635	0.051	0.027	0.78922	ENSMUSG00000031137
Hnrnpdl	3.94376e-05	0.0379652	0.27	0.201	0.792222	ENSMUSG00000029328
Capns1	3.95216e-05	0.0638112	0.531	0.403	0.793909	ENSMUSG00000001794
Dnpep	3.95358e-05	0.0275117	0.073	0.044	0.794195	ENSMUSG00000026209
Ndufs4	3.98747e-05	0.0381656	0.316	0.236	0.801003	ENSMUSG00000021764
Nomo1	4.01557e-05	0.0364651	0.151	0.106	0.806648	ENSMUSG00000030835
Rps23	4.04601e-05	-0.083489	0.877	0.847	0.812763	ENSMUSG00000049517
Chst2	4.06515e-05	0.0472106	0.384	0.289	0.816607	ENSMUSG00000033350
Smim10l1	4.07386e-05	-0.11152	0.404	0.402	0.818358	ENSMUSG00000072704
Gm45912	4.07496e-05	0.0126978	0.008	0	0.818579	ENSMUSG00000109685
Ern1	4.09958e-05	0.0285343	0.078	0.047	0.823524	ENSMUSG00000020715
Trub2	4.10354e-05	0.0237902	0.037	0.017	0.824319	ENSMUSG00000039826
Larp4	4.1218e-05	-0.101851	0.115	0.148	0.827988	ENSMUSG00000023025
Rnf19b	4.12526e-05	0.0303256	0.165	0.116	0.828683	ENSMUSG00000028793
Dtd2	4.17655e-05	0.0304672	0.091	0.057	0.838985	ENSMUSG00000020956
Slc4a2	4.18013e-05	0.033462	0.131	0.09	0.839705	ENSMUSG00000028962
Golga2	4.18036e-05	0.0211182	0.14	0.095	0.83975	ENSMUSG00000002546
Unc45a	4.20385e-05	0.0274851	0.044	0.022	0.844469	ENSMUSG00000030533
Sparc	4.22968e-05	-0.0227215	1	1	0.849657	ENSMUSG00000018593
Kmt2e	4.23747e-05	-0.050621	0.742	0.684	0.851223	ENSMUSG00000029004
Anp32a	4.27488e-05	-0.104677	0.443	0.435	0.858737	ENSMUSG00000032249
Wdfy3	4.27936e-05	0.0351693	0.168	0.119	0.859638	ENSMUSG00000043940
Npr1	4.30297e-05	0.0428492	0.117	0.079	0.86438	ENSMUSG00000027931
Etfb	4.36347e-05	0.0212269	0.153	0.107	0.876533	ENSMUSG00000004610
Cpne1	4.40216e-05	0.0269947	0.338	0.255	0.884305	ENSMUSG00000074643
Prpsap2	4.42693e-05	0.030863	0.124	0.084	0.889282	ENSMUSG00000020528
Hsd3b7	4.43294e-05	0.0217296	0.205	0.149	0.890489	ENSMUSG00000042289
Palld	4.46549e-05	0.0860592	0.649	0.516	0.897029	ENSMUSG00000058056
Sec13	4.48494e-05	0.0378278	0.267	0.199	0.900934	ENSMUSG00000030298
Ccdc69	4.50648e-05	0.021573	0.025	0.009	0.905261	ENSMUSG00000049588
Dmwd	4.5174e-05	0.0346214	0.149	0.104	0.907456	ENSMUSG00000030410
Stim2	4.54335e-05	0.0319366	0.087	0.055	0.912669	ENSMUSG00000039156
Mapkapk2	4.55144e-05	0.0337916	0.27	0.198	0.914293	ENSMUSG00000016528
Klhl29	4.58364e-05	0.0310936	0.087	0.055	0.920761	ENSMUSG00000020627
Brd4	4.61462e-05	-0.105618	0.446	0.438	0.926985	ENSMUSG00000024002
Abcf1	4.66635e-05	0.03935	0.295	0.223	0.937376	ENSMUSG00000038762
BC004004	4.70315e-05	0.0342082	0.378	0.309	0.944768	ENSMUSG00000052712
Mgmt	4.75836e-05	0.0409931	0.214	0.158	0.95586	ENSMUSG00000054612
1110008F13Rik	4.79481e-05	0.0337714	0.255	0.187	0.963182	ENSMUSG00000027637
Rpap1	4.81831e-05	0.0261842	0.036	0.017	0.967902	ENSMUSG00000034032
Rgs16	4.82776e-05	-0.0778881	0.048	0.074	0.9698	ENSMUSG00000026475
Tsc2	4.86196e-05	0.0287345	0.096	0.061	0.976671	ENSMUSG00000002496
Abtb1	4.87055e-05	0.0268933	0.036	0.017	0.978397	ENSMUSG00000030083
Mpdz	4.88949e-05	-0.0409937	0.741	0.673	0.982201	ENSMUSG00000028402
Slc2a4	4.93038e-05	0.0295815	0.03	0.012	0.990415	ENSMUSG00000018566
Ptprm	4.94899e-05	0.0278237	0.154	0.108	0.994153	ENSMUSG00000033278
Idh3b	5.00989e-05	0.0296763	0.132	0.09	1	ENSMUSG00000027406
Mettl23	5.01232e-05	0.0317392	0.146	0.102	1	ENSMUSG00000090266
Gm30400	5.01553e-05	-0.0103139	0	0.005	1	ENSMUSG00000109776
Txndc16	5.05374e-05	0.0316382	0.081	0.05	1	ENSMUSG00000021830
Cep78	5.05382e-05	0.0281842	0.058	0.032	1	ENSMUSG00000041491
Cox14	5.07703e-05	0.0295988	0.22	0.16	1	ENSMUSG00000023020
Tdg	5.07987e-05	0.0173366	0.105	0.069	1	ENSMUSG00000034674
Hpgd	5.11599e-05	-0.109673	0.109	0.141	1	ENSMUSG00000031613
Dgat1	5.15177e-05	0.0250388	0.083	0.052	1	ENSMUSG00000022555
Kng1	5.15914e-05	-0.0293597	0.867	0.816	1	ENSMUSG00000022875
Cdc42bpb	5.20833e-05	0.0352849	0.087	0.055	1	ENSMUSG00000021279
Smarcal1	5.22911e-05	0.0280519	0.095	0.061	1	ENSMUSG00000039354
Dvl3	5.23582e-05	0.0286241	0.177	0.126	1	ENSMUSG00000003233
Ccr9	5.24014e-05	-0.0213954	0.003	0.012	1	ENSMUSG00000029530
Frrs1	5.30678e-05	0.0227181	0.049	0.026	1	ENSMUSG00000033386
Gna11	5.31344e-05	0.033463	0.216	0.158	1	ENSMUSG00000034781
Nr2f6	5.37575e-05	0.0287254	0.111	0.073	1	ENSMUSG00000002393
Ppp3r1	5.39856e-05	0.0408685	0.323	0.243	1	ENSMUSG00000033953
Pigq	5.42837e-05	0.0302334	0.158	0.111	1	ENSMUSG00000025728
Bscl2	5.45698e-05	0.0344136	0.207	0.151	1	ENSMUSG00000071657
Chpf2	5.47258e-05	0.0296973	0.081	0.051	1	ENSMUSG00000038181
Sh3gl1	5.47408e-05	0.0344529	0.283	0.21	1	ENSMUSG00000003200
Fam13a	5.49634e-05	-0.0935771	0.109	0.142	1	ENSMUSG00000037709
Il6	5.55013e-05	-0.0157327	0	0.006	1	ENSMUSG00000025746
Nlrp3	5.55521e-05	-0.0131584	0	0.006	1	ENSMUSG00000032691
Ldlr	5.55772e-05	0.0278405	0.05	0.027	1	ENSMUSG00000032193
Eif4g1	5.57015e-05	0.0605985	0.504	0.386	1	ENSMUSG00000045983
Hebp1	5.59988e-05	0.0275924	0.12	0.081	1	ENSMUSG00000042770
Slc27a6	5.60755e-05	-0.0292593	0.009	0.023	1	ENSMUSG00000024600
Tusc2	5.61155e-05	0.0370079	0.092	0.059	1	ENSMUSG00000010054
Mpnd	5.64554e-05	0.0280778	0.102	0.067	1	ENSMUSG00000003199
Ptprj	5.67163e-05	0.0321715	0.168	0.12	1	ENSMUSG00000025314
Tdg-ps	5.73007e-05	0.015944	0.064	0.037	1	ENSMUSG00000047347
Mrap	5.75117e-05	0.028748	0.052	0.028	1	ENSMUSG00000039956
Ddx28	5.85998e-05	0.0281777	0.042	0.021	1	ENSMUSG00000045538
Ptpa	5.90585e-05	0.0343395	0.09	0.057	1	ENSMUSG00000039515
Srf	5.91078e-05	0.0311632	0.069	0.041	1	ENSMUSG00000015605
Fto	6.00157e-05	0.036888	0.251	0.187	1	ENSMUSG00000055932
Fkbp7	6.03141e-05	-0.112768	0.369	0.371	1	ENSMUSG00000002732
Adgrg2	6.05941e-05	0.0282283	0.032	0.014	1	ENSMUSG00000031298
Acta2	6.08371e-05	0.018161	0.015	0.003	1	ENSMUSG00000035783
Ltbr	6.09906e-05	0.050206	0.425	0.326	1	ENSMUSG00000030339
Akap1	6.12294e-05	0.0324452	0.062	0.036	1	ENSMUSG00000018428
Ncln	6.12521e-05	0.0272473	0.076	0.046	1	ENSMUSG00000020238
Eno1b	6.13605e-05	0.0159774	0.286	0.215	1	ENSMUSG00000059040
Cnot6	6.17895e-05	-0.123643	0.334	0.343	1	ENSMUSG00000020362
Phlda3	6.19555e-05	0.0321387	0.132	0.091	1	ENSMUSG00000041801
Gdap2	6.21543e-05	0.0253113	0.12	0.081	1	ENSMUSG00000027865
Svil	6.22977e-05	0.0286672	0.155	0.109	1	ENSMUSG00000024236
Dhx32	6.2455e-05	0.0259888	0.058	0.032	1	ENSMUSG00000030986
Col6a4	6.26614e-05	-0.0190395	0.002	0.01	1	ENSMUSG00000032572
Gm10282	6.26937e-05	-0.0991471	0.426	0.426	1	ENSMUSG00000070713
Rsl1d1	6.27504e-05	-0.113922	0.163	0.194	1	ENSMUSG00000005846
Nubp2	6.27978e-05	0.0276175	0.114	0.076	1	ENSMUSG00000039183
Cyb5a	6.31664e-05	-0.0335737	0.814	0.749	1	ENSMUSG00000024646
Hexa	6.40079e-05	0.0472399	0.386	0.294	1	ENSMUSG00000025232
Clcn7	6.40945e-05	0.0229673	0.119	0.08	1	ENSMUSG00000036636
Srxn1	6.42896e-05	0.0251677	0.086	0.054	1	ENSMUSG00000032802
Plekho2	6.43389e-05	0.027824	0.082	0.051	1	ENSMUSG00000050721
Zfp36l2	6.45033e-05	-0.0588381	0.697	0.635	1	ENSMUSG00000045817
Hprt	6.46011e-05	0.0339425	0.191	0.139	1	ENSMUSG00000025630
Cnp	6.47383e-05	0.0281599	0.059	0.034	1	ENSMUSG00000006782
Tob1	6.49334e-05	0.0265687	0.128	0.088	1	ENSMUSG00000037573
Ubl5	6.54488e-05	0.061034	0.521	0.398	1	ENSMUSG00000084786
Tmem261	6.56321e-05	0.0384479	0.177	0.128	1	ENSMUSG00000028398
Slirp	6.57037e-05	0.0383402	0.283	0.212	1	ENSMUSG00000021040
Adam28	6.58669e-05	0.021062	0.017	0.004	1	ENSMUSG00000014725
Gm10335	6.58718e-05	-0.0979134	0.315	0.347	1	ENSMUSG00000071532
Mrpl24	6.6056e-05	0.0352477	0.263	0.196	1	ENSMUSG00000019710
Rgs2	6.65219e-05	0.0330673	0.129	0.089	1	ENSMUSG00000026360
Igfbp2	6.67435e-05	0.01998	0.013	0.002	1	ENSMUSG00000039323
Ppme1	6.68881e-05	0.0280559	0.152	0.107	1	ENSMUSG00000030718
Rhod	6.72574e-05	0.0255564	0.08	0.05	1	ENSMUSG00000041845
Ptpmt1	6.7855e-05	0.0286679	0.135	0.094	1	ENSMUSG00000063235
Pex11g	6.86872e-05	0.0209364	0.018	0.005	1	ENSMUSG00000069633
Fblim1	6.88515e-05	0.0266175	0.08	0.05	1	ENSMUSG00000006219
Mrps12	6.93007e-05	0.0269404	0.161	0.114	1	ENSMUSG00000045948
Nagk	6.98871e-05	0.0311482	0.11	0.073	1	ENSMUSG00000034744
Ctsa	7.12593e-05	0.0523248	0.488	0.376	1	ENSMUSG00000017760
BC002163	7.14473e-05	0.0273842	0.36	0.272	1	ENSMUSG00000081824
Copg1	7.17371e-05	0.0474816	0.415	0.316	1	ENSMUSG00000030058
Urm1	7.22769e-05	0.033943	0.158	0.113	1	ENSMUSG00000069020
Rpl36a	7.23323e-05	-0.0829145	0.653	0.622	1	ENSMUSG00000079435
Elovl1	7.23844e-05	0.0331734	0.183	0.132	1	ENSMUSG00000006390
Armc10	7.23908e-05	0.0277709	0.086	0.055	1	ENSMUSG00000038525
Shisa3	7.29475e-05	-0.0599948	0.035	0.058	1	ENSMUSG00000050010
Ndufaf8	7.31619e-05	0.0310481	0.13	0.09	1	ENSMUSG00000078572
Plcb3	7.3633e-05	0.0249095	0.099	0.064	1	ENSMUSG00000024960
Gm14438	7.42483e-05	-0.0424855	0.123	0.16	1	ENSMUSG00000084323
Gpaa1	7.453e-05	0.0308768	0.153	0.108	1	ENSMUSG00000022561
Sirpa	7.46841e-05	0.0235382	0.027	0.011	1	ENSMUSG00000037902
Ndufa12	7.5221e-05	0.0210943	0.297	0.228	1	ENSMUSG00000020022
Trrap	7.55859e-05	0.0347109	0.128	0.088	1	ENSMUSG00000045482
Rock2	7.59257e-05	-0.0885609	0.531	0.5	1	ENSMUSG00000020580
Zswim6	7.63812e-05	0.0335666	0.159	0.113	1	ENSMUSG00000032846
Ctsf	7.66357e-05	0.0490689	0.42	0.32	1	ENSMUSG00000083282
9930012K11Rik	7.70257e-05	0.0286681	0.066	0.039	1	ENSMUSG00000044551
Uvrag	7.75909e-05	0.0291213	0.174	0.125	1	ENSMUSG00000035354
Ankfy1	7.76957e-05	0.0366839	0.251	0.2	1	ENSMUSG00000020790
Clstn2	7.92055e-05	-0.0385292	0.015	0.032	1	ENSMUSG00000032452
Dync1h1	7.93061e-05	0.0266962	0.215	0.156	1	ENSMUSG00000018707
Lias	7.95004e-05	0.0310151	0.178	0.129	1	ENSMUSG00000029199
Tle3	8.00772e-05	0.0306836	0.086	0.055	1	ENSMUSG00000032280
6030419C18Rik	8.01768e-05	0.0308588	0.081	0.051	1	ENSMUSG00000066607
52319	8.12369e-05	0.0202586	0.051	0.028	1	NA
Alg14	8.13482e-05	0.0253105	0.117	0.079	1	ENSMUSG00000039887
Mapk3	8.154e-05	0.0314429	0.256	0.19	1	ENSMUSG00000063065
Pigp	8.21325e-05	0.0305895	0.309	0.236	1	ENSMUSG00000022940
BC005537	8.21547e-05	-0.09884	0.455	0.442	1	ENSMUSG00000019132
Aco2	8.21622e-05	0.0336919	0.301	0.226	1	ENSMUSG00000022477
Nudt16	8.22757e-05	0.0297073	0.069	0.042	1	ENSMUSG00000032565
Dkk3	8.27333e-05	0.0503451	0.25	0.191	1	ENSMUSG00000030772
Ip6k2	8.40494e-05	0.0264129	0.164	0.117	1	ENSMUSG00000032599
Dlst	8.43242e-05	0.0319778	0.168	0.12	1	ENSMUSG00000004789
Pi4ka	8.43341e-05	0.0306869	0.114	0.077	1	ENSMUSG00000041720
Mapre2	8.43575e-05	-0.107238	0.165	0.196	1	ENSMUSG00000024277
Xrn2	8.51667e-05	0.0289968	0.27	0.202	1	ENSMUSG00000027433
Mrps15	8.5309e-05	0.0298595	0.123	0.085	1	ENSMUSG00000028861
Ctdnep1	8.56129e-05	0.0298235	0.223	0.165	1	ENSMUSG00000018559
Cited2	8.56858e-05	0.0543605	0.569	0.439	1	ENSMUSG00000039910
Baiap2	8.58303e-05	0.0253416	0.091	0.058	1	ENSMUSG00000025372
Prkg1	8.69891e-05	-0.11584	0.168	0.198	1	ENSMUSG00000052920
Atp6v0e	8.70262e-05	0.0649779	0.531	0.413	1	ENSMUSG00000015575
Tcta	8.72086e-05	0.0303402	0.211	0.155	1	ENSMUSG00000039461
Gm11336	8.72351e-05	-0.00514292	0.01	0.024	1	ENSMUSG00000080999
Sema7a	8.76696e-05	0.0317829	0.2	0.146	1	ENSMUSG00000038264
Romo1	8.89781e-05	0.0305005	0.152	0.108	1	ENSMUSG00000067847
Tmem165	8.94714e-05	0.0409419	0.311	0.235	1	ENSMUSG00000029234
Ap1s1	8.9949e-05	0.026699	0.198	0.143	1	ENSMUSG00000004849
Ralgapa1	9.00463e-05	-0.109308	0.143	0.173	1	ENSMUSG00000021027
Tuba1a	9.02029e-05	-0.0485538	0.779	0.744	1	ENSMUSG00000072235
Glrx5	9.02943e-05	0.0340468	0.232	0.171	1	ENSMUSG00000021102
Amot	9.06029e-05	0.0245066	0.106	0.07	1	ENSMUSG00000041688
Raph1	9.06917e-05	0.033286	0.145	0.102	1	ENSMUSG00000026014
Gstp1	9.0748e-05	0.0547068	0.767	0.646	1	ENSMUSG00000060803
Ccdc32	9.09211e-05	0.0289499	0.141	0.099	1	ENSMUSG00000039983
Gm12504	9.11416e-05	0.0199105	0.026	0.01	1	ENSMUSG00000084274
Srpx2	9.1935e-05	0.0438889	0.39	0.295	1	ENSMUSG00000031253
Gas1	9.29047e-05	-0.107081	0.435	0.442	1	ENSMUSG00000052957
Sec22a	9.38347e-05	0.0276817	0.089	0.057	1	ENSMUSG00000034473
Psma2	9.42893e-05	0.0612093	0.516	0.403	1	ENSMUSG00000015671
Eif4a3	9.45965e-05	0.0285247	0.192	0.141	1	ENSMUSG00000025580
51928	9.46226e-05	0.0238564	0.105	0.071	1	NA
Lamtor2	9.47501e-05	0.0274714	0.154	0.109	1	ENSMUSG00000028062
Abcc5	9.60977e-05	0.0319799	0.197	0.144	1	ENSMUSG00000022822
Klf6	9.68926e-05	-0.0936834	0.536	0.508	1	ENSMUSG00000000078
Snrnp48	9.79593e-05	-0.0959814	0.104	0.134	1	ENSMUSG00000021431
Aplp2	9.8375e-05	-0.0117481	0.914	0.855	1	ENSMUSG00000031996
Amfr	9.87184e-05	0.0351931	0.247	0.185	1	ENSMUSG00000031751
Snx33	9.8722e-05	0.0286219	0.106	0.071	1	ENSMUSG00000032733
Kcnab1	9.99186e-05	-0.0297864	0.01	0.024	1	ENSMUSG00000027827
Rbm45	9.99204e-05	0.0290965	0.12	0.082	1	ENSMUSG00000042369
Ythdf1	0.000100181	-0.117961	0.22	0.247	1	ENSMUSG00000038848
2010107E04Rik	0.000100649	0.0468032	0.367	0.283	1	ENSMUSG00000021290
Ogfod3	0.000101729	0.0255765	0.086	0.055	1	ENSMUSG00000025169
Mrpl40	0.000101737	0.0321938	0.092	0.06	1	ENSMUSG00000022706
Ppp2r3a	0.000101768	-0.105392	0.137	0.167	1	ENSMUSG00000043154
Irf7	0.000102864	0.0313004	0.101	0.067	1	ENSMUSG00000025498
Gm45551	0.000102946	0.0292909	0.086	0.056	1	ENSMUSG00000109916
Creld2	0.000103002	0.0329818	0.219	0.162	1	ENSMUSG00000023272
1700020I14Rik	0.000103224	-0.101936	0.411	0.409	1	ENSMUSG00000085438
Gm28036	0.000103851	0.0232449	0.341	0.259	1	ENSMUSG00000098950
Ptk7	0.000103917	0.033567	0.144	0.102	1	ENSMUSG00000023972
Cygb	0.000104748	-0.0976092	0.457	0.454	1	ENSMUSG00000020810
Cdca4	0.000105251	0.0229652	0.124	0.085	1	ENSMUSG00000047832
Cops5	0.000105324	0.0276263	0.179	0.13	1	ENSMUSG00000025917
Tkfc	0.000106263	0.0259725	0.052	0.029	1	ENSMUSG00000034371
Rps7	0.000106538	-0.0817709	0.786	0.733	1	ENSMUSG00000061477
Rps23-ps1	0.00010663	-0.0942445	0.431	0.465	1	ENSMUSG00000100755
Def6	0.000106638	0.0258272	0.038	0.019	1	ENSMUSG00000002257
Hadh	0.000107597	0.0400775	0.384	0.292	1	ENSMUSG00000027984
Rpl36a-ps3	0.000107816	0.0118123	0.266	0.2	1	ENSMUSG00000071141
Kcne4	0.000108268	0.0318308	0.074	0.046	1	ENSMUSG00000047330
Klf11	0.000109571	0.0254211	0.056	0.032	1	ENSMUSG00000020653
Lrp5	0.000109719	0.0299409	0.168	0.121	1	ENSMUSG00000024913
Scarb1	0.000109782	0.0317337	0.076	0.048	1	ENSMUSG00000037936
Samd4	0.000110264	0.0361928	0.079	0.05	1	ENSMUSG00000021838
Gm43802	0.000110724	-0.00778424	0	0.005	1	ENSMUSG00000105338
Dpysl5	0.000110724	-0.00992585	0	0.005	1	ENSMUSG00000029168
Lilr4b	0.000110724	-0.0106991	0	0.005	1	ENSMUSG00000112023
Mpo	0.000110724	-0.0109331	0	0.005	1	ENSMUSG00000009350
Cd226	0.000110724	-0.00965466	0	0.005	1	ENSMUSG00000034028
Ms4a2	0.000110724	-0.0101449	0	0.005	1	ENSMUSG00000024680
Psmd8	0.000110739	0.0271445	0.236	0.175	1	ENSMUSG00000030591
Cttn	0.00011093	0.0489299	0.422	0.324	1	ENSMUSG00000031078
Abcg1	0.000110984	0.017571	0.014	0.003	1	ENSMUSG00000024030
Pgs1	0.000112379	0.0336783	0.213	0.158	1	ENSMUSG00000017715
Rnf126	0.000112989	0.022667	0.049	0.027	1	ENSMUSG00000035890
Mfge8	0.000113637	0.0628802	0.497	0.389	1	ENSMUSG00000030605
Nck1	0.000114	-0.106065	0.138	0.169	1	ENSMUSG00000032475
Ganab	0.000114163	0.0491848	0.43	0.328	1	ENSMUSG00000071650
Dctn3	0.000114189	0.026597	0.103	0.068	1	ENSMUSG00000028447
Bop1	0.000115242	0.0278153	0.085	0.055	1	ENSMUSG00000022557
Ror2	0.000115419	0.0251154	0.033	0.015	1	ENSMUSG00000021464
Slc31a1	0.000115688	0.0255196	0.131	0.091	1	ENSMUSG00000066150
Elavl1	0.000116267	0.025585	0.213	0.157	1	ENSMUSG00000040028
Kbtbd3	0.000116586	0.0254921	0.044	0.023	1	ENSMUSG00000025893
Rhoa	0.000116687	-0.0275381	0.797	0.738	1	ENSMUSG00000007815
Cebpb	0.000117241	0.026027	0.204	0.149	1	ENSMUSG00000056501
Phf5a	0.000117605	0.0315548	0.21	0.155	1	ENSMUSG00000061360
Edem1	0.000117732	0.0291762	0.168	0.121	1	ENSMUSG00000030104
Sap30l	0.00011777	0.0318313	0.18	0.132	1	ENSMUSG00000020519
Rab9	0.000117814	0.0331311	0.318	0.24	1	ENSMUSG00000079316
Sirt3	0.000118546	0.0260109	0.035	0.017	1	ENSMUSG00000025486
Chid1	0.000118762	0.028377	0.075	0.047	1	ENSMUSG00000025512
Itpka	0.000119095	0.0118592	0.007	0	1	ENSMUSG00000027296
Thoc3	0.000119151	0.0299319	0.086	0.056	1	ENSMUSG00000025872
Lrp4	0.000119782	0.0252338	0.074	0.046	1	ENSMUSG00000027253
Rab20	0.000120192	0.0298393	0.065	0.039	1	ENSMUSG00000031504
Hipk1	0.000120395	0.0321296	0.292	0.221	1	ENSMUSG00000008730
Itgb5	0.00012049	0.0284855	0.194	0.142	1	ENSMUSG00000022817
Pxmp4	0.000120685	0.0318265	0.229	0.171	1	ENSMUSG00000000876
Lman2	0.000120697	0.03752	0.309	0.235	1	ENSMUSG00000021484
Kcnn4	0.000121219	-0.0129951	0	0.006	1	ENSMUSG00000054342
Unc93b1	0.000121283	0.0298021	0.233	0.172	1	ENSMUSG00000036908
Idnk	0.000122026	0.0270383	0.149	0.106	1	ENSMUSG00000050002
Slc35d3	0.000122319	-0.0176298	0.002	0.01	1	ENSMUSG00000050473
Tmbim4	0.000122736	0.0334164	0.216	0.16	1	ENSMUSG00000020225
D10Jhu81e	0.000123024	0.0317467	0.271	0.204	1	ENSMUSG00000053329
Vmn2r97	0.000123059	0.0255198	0.054	0.031	1	ENSMUSG00000091491
Cdkn1b	0.000123848	-0.104809	0.389	0.393	1	ENSMUSG00000003031
Fam20b	0.000123939	0.0300307	0.25	0.187	1	ENSMUSG00000033557
Ndufb10	0.000124102	0.0286445	0.234	0.174	1	ENSMUSG00000040048
Lingo1	0.000124587	-0.0403698	0.014	0.029	1	ENSMUSG00000049556
Fos	0.000124935	0.0447096	0.422	0.343	1	ENSMUSG00000021250
Prorsd1	0.000125397	0.0270541	0.13	0.09	1	ENSMUSG00000032673
Alyref	0.00012574	0.0311991	0.122	0.085	1	ENSMUSG00000025134
Hdac4	0.000127837	0.029626	0.098	0.065	1	ENSMUSG00000026313
Rnf215	0.000127979	0.0303652	0.13	0.091	1	ENSMUSG00000003581
Nsmce4a	0.000128028	0.027039	0.094	0.061	1	ENSMUSG00000040331
Pla2g4b	0.000128446	-0.0108863	0.001	0.008	1	ENSMUSG00000098488
Mink1	0.000128558	0.0267644	0.065	0.039	1	ENSMUSG00000020827
Ssh2	0.00012877	0.039161	0.292	0.222	1	ENSMUSG00000037926
Slc2a3	0.000129113	0.0261453	0.146	0.104	1	ENSMUSG00000003153
Lypla1	0.0001305	0.0298149	0.15	0.108	1	ENSMUSG00000025903
Faf2	0.000131046	0.0334367	0.183	0.135	1	ENSMUSG00000025873
Pank4	0.00013143	0.0238802	0.111	0.075	1	ENSMUSG00000029056
Ace	0.000131828	0.0273653	0.092	0.06	1	ENSMUSG00000020681
Pigx	0.000132407	0.0272679	0.169	0.122	1	ENSMUSG00000023791
Fam111a	0.000132612	0.0216048	0.031	0.014	1	ENSMUSG00000024691
Hist1h2ae	0.00013296	-0.00785859	0.013	0.027	1	ENSMUSG00000069272
6330403K07Rik	0.000133555	-0.0293636	0.008	0.02	1	ENSMUSG00000018451
Psma5	0.000133952	0.023227	0.219	0.163	1	ENSMUSG00000068749
Mcc	0.000134071	0.0270517	0.057	0.033	1	ENSMUSG00000071856
Gipc1	0.000134141	0.0200897	0.034	0.016	1	ENSMUSG00000019433
Psmb10	0.000134765	0.0430651	0.378	0.289	1	ENSMUSG00000031897
Rbpms	0.000134851	-0.0910074	0.491	0.471	1	ENSMUSG00000031586
Slc11a2	0.000135106	0.0275726	0.082	0.053	1	ENSMUSG00000023030
Slc15a5	0.000135532	0.0159892	0.024	0.009	1	ENSMUSG00000044378
Vwa8	0.000135869	0.0274473	0.062	0.037	1	ENSMUSG00000058997
Tspan17	0.000136666	0.0318166	0.29	0.218	1	ENSMUSG00000025875
Ptprz1	0.000137246	-0.0277458	0.008	0.02	1	ENSMUSG00000068748
U2af1l4.1	0.000137653	0.0111248	0.12	0.082	1	NA
Slc35e4	0.000138221	0.0303844	0.102	0.069	1	ENSMUSG00000048807
Glg1	0.000138361	-0.0592469	0.636	0.586	1	ENSMUSG00000003316
Rpl13a	0.000138734	-0.0592219	0.736	0.685	1	ENSMUSG00000074129
Ulk1	0.000139377	0.0252607	0.087	0.056	1	ENSMUSG00000029512
Rpl17-ps5	0.000140175	-0.0851543	0.355	0.383	1	ENSMUSG00000081855
Tapbpl	0.000140645	0.0246757	0.191	0.14	1	ENSMUSG00000038213
Polr2h	0.000141213	0.0214611	0.036	0.018	1	ENSMUSG00000021018
Anpep	0.00014143	0.0224323	0.055	0.031	1	ENSMUSG00000039062
Mpzl1	0.000142515	0.0633302	0.562	0.437	1	ENSMUSG00000026566
Aldh3a1	0.000142596	0.0393065	0.27	0.206	1	ENSMUSG00000019102
Ube2c	0.000142699	-0.0250487	0.005	0.015	1	ENSMUSG00000001403
Vasp	0.000142984	0.0351698	0.298	0.225	1	ENSMUSG00000030403
Zwint	0.000143215	0.0368072	0.349	0.265	1	ENSMUSG00000019923
Gm2223	0.00014586	-0.0218803	0.01	0.023	1	ENSMUSG00000079297
Mfsd5	0.000146208	0.0231313	0.145	0.103	1	ENSMUSG00000045665
Aifm2	0.000146208	0.0258683	0.045	0.024	1	ENSMUSG00000020085
H2-Q7	0.00014654	0.0864867	0.812	0.67	1	ENSMUSG00000060550
Wdr24	0.000146996	0.0204561	0.038	0.019	1	ENSMUSG00000025737
Ahnak	0.000147583	0.0898585	0.863	0.727	1	ENSMUSG00000069833
Serpina3c	0.000147683	-0.0813805	0.597	0.558	1	ENSMUSG00000066361
Apeh	0.000147819	0.0260433	0.081	0.052	1	ENSMUSG00000032590
Tcf20	0.000148663	0.0312525	0.11	0.075	1	ENSMUSG00000041852
Airn	0.000150137	0.0281463	0.064	0.038	1	ENSMUSG00000078247
Podn	0.000152231	0.0381872	0.264	0.2	1	ENSMUSG00000028600
Cfl1	0.000153362	-0.0133797	0.991	0.966	1	ENSMUSG00000056201
Slc39a13	0.000153619	0.0260926	0.16	0.114	1	ENSMUSG00000002105
Aff2	0.000153634	-0.0214763	0.005	0.016	1	ENSMUSG00000031189
Stard13	0.00015396	0.0240259	0.136	0.095	1	ENSMUSG00000016128
Ptpn14	0.000154174	0.0301933	0.258	0.195	1	ENSMUSG00000026604
Gabarapl1	0.000155787	0.0342644	0.194	0.144	1	ENSMUSG00000030161
Eno1	0.000156262	0.0153509	0.288	0.22	1	ENSMUSG00000063524
Atp6v1b2	0.000156985	0.0322775	0.305	0.23	1	ENSMUSG00000006273
Abat	0.000157131	-0.107493	0.146	0.175	1	ENSMUSG00000057880
Hmgn2	0.000157261	-0.0918203	0.547	0.526	1	ENSMUSG00000003038
Tram2	0.00015737	0.0256814	0.078	0.05	1	ENSMUSG00000041779
Dlc1	0.000157977	-0.0589626	0.637	0.599	1	ENSMUSG00000031523
Hadhb	0.000158398	0.01806	0.26	0.194	1	ENSMUSG00000059447
Dexi	0.000158648	0.0257383	0.097	0.064	1	ENSMUSG00000038055
Scn1b	0.000158733	0.0269738	0.269	0.203	1	ENSMUSG00000019194
Gm14303	0.000160066	-0.0612468	0.138	0.174	1	ENSMUSG00000081344
Matn3	0.000161081	0.0196405	0.029	0.013	1	ENSMUSG00000020583
Mief2	0.000161267	0.0232352	0.047	0.026	1	ENSMUSG00000018599
Ube2m	0.000163409	0.0327471	0.141	0.101	1	ENSMUSG00000005575
Tarbp2	0.000163978	0.0272385	0.063	0.038	1	ENSMUSG00000023051
Clta	0.000164805	0.043455	0.398	0.305	1	ENSMUSG00000028478
Fap	0.000165854	-0.0986992	0.428	0.421	1	ENSMUSG00000000392
Ugcg	0.000167668	-0.0820721	0.08	0.108	1	ENSMUSG00000028381
Prrc2b	0.000168419	-0.0885366	0.518	0.486	1	ENSMUSG00000039262
Mcts1	0.000168903	0.0280066	0.145	0.104	1	ENSMUSG00000000355
Vangl1	0.00016984	0.0296812	0.154	0.111	1	ENSMUSG00000027860
Snx21	0.00017001	0.0252227	0.124	0.086	1	ENSMUSG00000050373
Fam129b	0.00017036	0.0271567	0.136	0.096	1	ENSMUSG00000026796
2210016F16Rik	0.000171134	0.0297604	0.141	0.101	1	ENSMUSG00000021550
Mrpl28	0.00017315	0.0247417	0.04	0.021	1	ENSMUSG00000024181
Stt3b	0.0001734	0.036056	0.323	0.247	1	ENSMUSG00000032437
Usp50	0.000173934	0.01137	0.164	0.119	1	ENSMUSG00000027364
Aifm1	0.00017445	0.0275232	0.095	0.063	1	ENSMUSG00000036932
Mllt6	0.000175325	0.019943	0.226	0.167	1	ENSMUSG00000038437
Atp10a	0.000175883	0.0242069	0.032	0.015	1	ENSMUSG00000025324
Ghr	0.000176549	-0.0627832	0.618	0.582	1	ENSMUSG00000055737
Atg9a	0.000178338	0.0195928	0.072	0.046	1	ENSMUSG00000033124
Ctif	0.000178403	0.0222026	0.109	0.074	1	ENSMUSG00000052928
Tob2	0.000178794	0.0395537	0.306	0.235	1	ENSMUSG00000048546
Rbm47	0.000178951	0.0181821	0.024	0.009	1	ENSMUSG00000070780
Rps15	0.000179204	-0.0887923	0.545	0.522	1	ENSMUSG00000063457
Yars	0.000179561	0.0197119	0.059	0.034	1	ENSMUSG00000028811
Rnpepl1	0.000180159	0.0275725	0.096	0.064	1	ENSMUSG00000026269
Vipr2	0.000180985	0.0240498	0.07	0.044	1	ENSMUSG00000011171
Prkag2	0.000181721	0.0231033	0.044	0.024	1	ENSMUSG00000028944
Mdp1	0.000182632	0.0238869	0.122	0.085	1	ENSMUSG00000002329
Rps12-ps1	0.000183277	-0.0358036	0.162	0.2	1	ENSMUSG00000082746
Ccndbp1	0.000183817	0.0343601	0.164	0.12	1	ENSMUSG00000023572
Bmp1	0.00018398	0.0488029	0.438	0.34	1	ENSMUSG00000022098
Abhd17a	0.00018484	0.0209558	0.109	0.074	1	ENSMUSG00000003346
AU020206	0.000185556	0.0262776	0.05	0.028	1	ENSMUSG00000097415
Fkbp10	0.000186669	0.0452291	0.395	0.305	1	ENSMUSG00000001555
Eri3	0.000187506	0.0285081	0.125	0.088	1	ENSMUSG00000033423
Gm20427	0.000189292	0.0427007	0.546	0.434	1	ENSMUSG00000092595
CT573034.2	0.000189951	-0.00829295	0.006	0.017	1	ENSMUSG00000113151
Nhp2	0.00019013	0.0245404	0.044	0.024	1	ENSMUSG00000001056
Elovl4	0.000190757	-0.0998523	0.112	0.14	1	ENSMUSG00000032262
Tmem198b	0.000190835	0.0259403	0.073	0.046	1	ENSMUSG00000047090
Igfals	0.0001914	0.0201032	0.022	0.008	1	ENSMUSG00000046070
Foxo1	0.000191874	0.0388002	0.215	0.162	1	ENSMUSG00000044167
Natd1	0.000192427	0.0227518	0.073	0.046	1	ENSMUSG00000018931
Cdk9	0.000193385	0.0274694	0.154	0.112	1	ENSMUSG00000009555
Pitx1	0.000193693	0.0320768	0.104	0.071	1	ENSMUSG00000021506
Il17ra	0.000195325	0.0232943	0.103	0.069	1	ENSMUSG00000002897
Slc24a3	0.000199588	-0.0847531	0.092	0.12	1	ENSMUSG00000063873
Bves	0.000201566	0.0314697	0.067	0.041	1	ENSMUSG00000071317
Igsf3	0.000202319	-0.0276498	0.835	0.784	1	ENSMUSG00000042035
Slc12a9	0.00020249	0.0230795	0.049	0.028	1	ENSMUSG00000037344
Odc1	0.000202581	0.033421	0.36	0.28	1	ENSMUSG00000011179
Acy3	0.000204664	0.0253808	0.175	0.128	1	ENSMUSG00000024866
Stoml1	0.000206492	0.0229963	0.075	0.048	1	ENSMUSG00000032333
Slc36a1	0.000207064	0.0220205	0.068	0.042	1	ENSMUSG00000020261
Slc27a4	0.000207651	0.0258229	0.092	0.061	1	ENSMUSG00000059316
Manbal	0.000208673	0.0273561	0.126	0.088	1	ENSMUSG00000063019
Hist1h2ab	0.00020905	-0.0056921	0.012	0.026	1	ENSMUSG00000061615
Cd59a	0.000209087	0.0187248	0.046	0.025	1	ENSMUSG00000032679
Zranb1	0.000211467	0.0281642	0.195	0.145	1	ENSMUSG00000030967
Rab11a	0.000212393	0.0384645	0.29	0.223	1	ENSMUSG00000004771
Brf1	0.000212781	0.023476	0.082	0.053	1	ENSMUSG00000011158
Insig2	0.000213005	-0.0422875	0.73	0.672	1	ENSMUSG00000003721
Col6a5	0.000213498	0.018736	0.02	0.007	1	ENSMUSG00000091345
Gm12657	0.000213924	-0.0159852	0.023	0.041	1	ENSMUSG00000063314
Yipf1	0.00021449	0.0305872	0.185	0.138	1	ENSMUSG00000057375
Rnf181	0.000215002	0.0273248	0.247	0.186	1	ENSMUSG00000055850
Foxred1	0.000216968	0.0251518	0.075	0.048	1	ENSMUSG00000039048
Gm5851	0.0002172	-0.0304732	0.066	0.091	1	ENSMUSG00000104028
Bhlhe40	0.000217273	0.0267564	0.047	0.027	1	ENSMUSG00000030103
Pqlc1	0.000218323	0.0208479	0.097	0.064	1	ENSMUSG00000034006
Cx3cl1	0.000219085	0.0367537	0.32	0.246	1	ENSMUSG00000031778
Tmem129	0.000221165	0.0156627	0.081	0.052	1	ENSMUSG00000019295
Snap47	0.000221349	0.0213821	0.097	0.065	1	ENSMUSG00000009894
Nhsl1	0.000221397	0.016599	0.046	0.026	1	ENSMUSG00000039835
Megf8	0.000221695	0.0253151	0.141	0.101	1	ENSMUSG00000045039
Fam222a	0.00022171	0.0123903	0.008	0	1	ENSMUSG00000041930
Slc39a9	0.000221877	0.0301051	0.168	0.123	1	ENSMUSG00000048833
Fkbp15	0.000223701	0.0262459	0.12	0.084	1	ENSMUSG00000066151
Anapc4	0.000223704	0.0218108	0.169	0.123	1	ENSMUSG00000029176
Sp1	0.000224572	-0.0973719	0.451	0.437	1	ENSMUSG00000001280
Hp1bp3	0.000225994	-0.078298	0.558	0.526	1	ENSMUSG00000028759
S100a13	0.000227296	0.0639276	0.559	0.446	1	ENSMUSG00000042312
Gm28043	0.000227941	0.0140453	0.104	0.071	1	ENSMUSG00000098374
Eef2kmt	0.000228415	0.0259128	0.066	0.041	1	ENSMUSG00000022544
Gpr153	0.000228823	0.0402975	0.376	0.29	1	ENSMUSG00000042804
Ifi35	0.000229088	0.0218059	0.138	0.098	1	ENSMUSG00000010358
Heph	0.000229293	0.0281099	0.187	0.139	1	ENSMUSG00000031209
Rhob	0.000229762	-0.0411214	0.767	0.688	1	ENSMUSG00000054364
Dync1i1	0.000231014	0.020744	0.027	0.012	1	ENSMUSG00000029757
Tspan31	0.000231759	0.0431814	0.432	0.332	1	ENSMUSG00000006736
Atraid	0.000232464	0.0238625	0.3	0.226	1	ENSMUSG00000013622
Gpsm3	0.000233114	0.0258662	0.179	0.132	1	ENSMUSG00000034786
Slc5a6	0.00023414	-0.0283801	0.012	0.026	1	ENSMUSG00000006641
Adrm1	0.000235047	0.0115524	0.161	0.117	1	ENSMUSG00000039041
Usp47	0.000235547	0.0248657	0.149	0.107	1	ENSMUSG00000059263
Ddrgk1	0.000235936	0.0284432	0.195	0.144	1	ENSMUSG00000068290
Klhl26	0.000236217	0.0269727	0.096	0.065	1	ENSMUSG00000055707
Cfh	0.000236222	-0.0160857	0.938	0.888	1	ENSMUSG00000026365
Ablim2	0.000236815	0.0193014	0.028	0.012	1	ENSMUSG00000029095
Gm6139	0.000237019	-0.0305689	0.206	0.239	1	ENSMUSG00000057244
P3h4	0.000238128	0.0283483	0.157	0.114	1	ENSMUSG00000006931
Snhg8	0.000239081	0.0229052	0.145	0.104	1	ENSMUSG00000104960
Gadd45g	0.000239372	0.0252181	0.196	0.145	1	ENSMUSG00000021453
Snrpe	0.00024063	0.0233251	0.358	0.281	1	ENSMUSG00000090553
Atp5g1	0.000241717	0.0456778	0.43	0.349	1	ENSMUSG00000006057
Smpd1	0.000242829	0.0225879	0.202	0.149	1	ENSMUSG00000037049
Arhgef11	0.0002437	0.0236847	0.245	0.185	1	ENSMUSG00000041977
Gm43713	0.00024429	0.00664941	0.007	0	1	ENSMUSG00000106218
BB019430	0.00024429	0.010736	0.007	0	1	ENSMUSG00000091526
Gm11847	0.000244664	-0.0279302	0.064	0.09	1	ENSMUSG00000060989
Gm13710	0.000245366	-0.00893732	0	0.004	1	ENSMUSG00000087362
Gm9845	0.000245366	-0.00595742	0	0.004	1	ENSMUSG00000050533
Speer4a	0.000245366	-0.00792438	0	0.004	1	ENSMUSG00000073119
9530018H14Rik	0.000245366	-0.0101229	0	0.004	1	ENSMUSG00000102373
Gm45061	0.000245366	-0.00946789	0	0.004	1	ENSMUSG00000108075
Slc18a2	0.000245366	-0.00833423	0	0.004	1	ENSMUSG00000025094
Myo9b	0.000245637	0.0200712	0.042	0.023	1	ENSMUSG00000004677
Srd5a3	0.000246667	0.0228979	0.223	0.166	1	ENSMUSG00000029233
Plekhf1	0.000246715	0.0302696	0.23	0.172	1	ENSMUSG00000074170
Tmem160	0.000247625	0.0233708	0.193	0.143	1	ENSMUSG00000019158
Nisch	0.000247871	0.0342263	0.314	0.242	1	ENSMUSG00000021910
Maged2	0.000248415	0.0299299	0.219	0.165	1	ENSMUSG00000025268
Zfp358	0.000248491	0.0253233	0.143	0.102	1	ENSMUSG00000047264
Gm14608	0.000250406	0.00965862	0.012	0.002	1	ENSMUSG00000084348
Abhd15	0.000250429	0.0230505	0.035	0.018	1	ENSMUSG00000000686
2510009E07Rik	0.000252972	-0.0961755	0.127	0.156	1	ENSMUSG00000043391
Ccnd1	0.000253714	0.0179352	0.025	0.01	1	ENSMUSG00000070348
Nt5dc2	0.000254317	0.0240824	0.193	0.143	1	ENSMUSG00000071547
Phospho1	0.000254758	0.00988042	0.012	0.002	1	ENSMUSG00000050860
Prkab1	0.000254948	0.024984	0.076	0.049	1	ENSMUSG00000029513
Chst15	0.000256303	0.0669338	0.589	0.471	1	ENSMUSG00000030930
Hfe	0.000257103	0.0334004	0.319	0.248	1	ENSMUSG00000006611
Fam8a1	0.000258506	0.0236729	0.15	0.109	1	ENSMUSG00000069237
Usf2	0.00026094	0.042191	0.405	0.313	1	ENSMUSG00000058239
C5ar1	0.000262091	0.022068	0.034	0.017	1	ENSMUSG00000049130
Gm14044	0.00026227	-0.0584614	0.368	0.406	1	ENSMUSG00000083483
Wdr86	0.000262643	0.0464347	0.457	0.349	1	ENSMUSG00000055235
F8a	0.000262779	0.0230823	0.052	0.03	1	ENSMUSG00000078317
Slc38a2	0.000262831	0.032636	0.284	0.217	1	ENSMUSG00000022462
Nsmaf	0.000263169	0.0233378	0.055	0.032	1	ENSMUSG00000028245
Gata1	0.000264306	-0.0167452	0.001	0.008	1	ENSMUSG00000031162
Arrdc3	0.000264918	0.026472	0.041	0.022	1	ENSMUSG00000074794
Mrgpre	0.00026535	0.0246662	0.103	0.071	1	ENSMUSG00000048965
Itga4	0.000265452	-0.0112457	0	0.005	1	ENSMUSG00000027009
Tmem259	0.000265577	0.0243658	0.1	0.068	1	ENSMUSG00000013858
Lrrc4c	0.000265736	0.0195355	0.018	0.006	1	ENSMUSG00000050587
Coq6	0.000265942	0.0262774	0.042	0.023	1	ENSMUSG00000021235
Trim16	0.000268188	0.011283	0.01	0.001	1	ENSMUSG00000047821
Klhl36	0.000268838	0.0269833	0.046	0.026	1	ENSMUSG00000031828
1810058I24Rik	0.000269624	0.0334273	0.34	0.261	1	ENSMUSG00000073155
Adcy2	0.000272146	-0.0878664	0.479	0.464	1	ENSMUSG00000021536
Hist1h2ac	0.0002723	-0.00686131	0.015	0.03	1	ENSMUSG00000069270
Lama3	0.000272341	-0.0241757	0.005	0.015	1	ENSMUSG00000024421
Pdlim1	0.000272817	0.0256577	0.276	0.209	1	ENSMUSG00000055044
Fmnl2	0.000273249	0.0262194	0.196	0.145	1	ENSMUSG00000036053
Uqcrc2	0.000273465	0.0324446	0.305	0.233	1	ENSMUSG00000030884
Mgst3	0.000273844	0.0254738	0.103	0.071	1	ENSMUSG00000026688
Lrrc41	0.000273923	0.0232742	0.089	0.059	1	ENSMUSG00000028703
Efhd2	0.000273947	0.017506	0.141	0.101	1	ENSMUSG00000040659
Minos1	0.000274719	0.0264671	0.162	0.119	1	ENSMUSG00000050608
Tln1	0.000276453	0.0868272	0.732	0.582	1	ENSMUSG00000028465
Zzef1	0.000276456	0.0224737	0.133	0.095	1	ENSMUSG00000055670
Swi5	0.000277509	0.0376586	0.369	0.285	1	ENSMUSG00000044627
Gm5850	0.00027949	-0.0297184	0.066	0.091	1	ENSMUSG00000103286
Psmc3	0.000280462	0.0379526	0.335	0.26	1	ENSMUSG00000002102
Gfm2	0.000281813	0.0230064	0.045	0.025	1	ENSMUSG00000021666
Shroom3	0.000281955	0.0281067	0.085	0.057	1	ENSMUSG00000029381
Cant1	0.000283298	0.0195239	0.183	0.135	1	ENSMUSG00000025575
Smu1	0.000283718	0.0290735	0.22	0.165	1	ENSMUSG00000028409
Ggcx	0.000283845	0.0252328	0.153	0.112	1	ENSMUSG00000053460
Ankef1	0.000284128	0.0190435	0.03	0.014	1	ENSMUSG00000074771
Hnrnpm	0.00028432	-0.100317	0.394	0.391	1	ENSMUSG00000059208
Rab10os	0.000285067	0.0227583	0.05	0.029	1	ENSMUSG00000079179
Cmc1	0.000286569	0.0199691	0.109	0.075	1	ENSMUSG00000039163
Egln1	0.000287862	0.0233225	0.254	0.191	1	ENSMUSG00000031987
Camk2d	0.000288134	0.0333512	0.232	0.177	1	ENSMUSG00000053819
Lfng	0.00028831	0.0341385	0.374	0.288	1	ENSMUSG00000029570
Gm2a	0.000289992	0.0591724	0.532	0.419	1	ENSMUSG00000000594
Gorasp2	0.000290154	0.0253142	0.286	0.217	1	ENSMUSG00000014959
Blvra	0.000293052	0.0230239	0.095	0.064	1	ENSMUSG00000001999
Gskip	0.000294793	0.0218947	0.117	0.082	1	ENSMUSG00000044715
Fbxo25	0.000297443	0.026119	0.101	0.069	1	ENSMUSG00000038365
Ssbp1	0.000298436	0.0255363	0.267	0.203	1	ENSMUSG00000029911
Vps13d	0.000300621	0.0233908	0.08	0.052	1	ENSMUSG00000020220
Pi4k2a	0.000300853	0.0228566	0.061	0.037	1	ENSMUSG00000025178
Slc27a1	0.000301937	0.0203305	0.051	0.029	1	ENSMUSG00000031808
Washc1	0.000304938	0.0277195	0.083	0.055	1	ENSMUSG00000024101
Arhgef17	0.000305381	0.0271264	0.182	0.135	1	ENSMUSG00000032875
Cyp4f16	0.000305851	0.0200656	0.046	0.026	1	ENSMUSG00000048440
Ugdh	0.00030679	0.0292773	0.223	0.169	1	ENSMUSG00000029201
Oxsm	0.000306836	0.026271	0.068	0.043	1	ENSMUSG00000021786
Nudcd3	0.000307333	0.023732	0.193	0.143	1	ENSMUSG00000053838
Zdhhc4	0.000309286	0.0282895	0.215	0.162	1	ENSMUSG00000001844
Slc18b1	0.000310965	0.0239202	0.103	0.07	1	ENSMUSG00000037455
Ankrd46	0.000312631	0.0232303	0.195	0.144	1	ENSMUSG00000048307
Pelo	0.000313011	0.0115827	0.116	0.081	1	ENSMUSG00000042275
Lgals9	0.00031354	0.0295724	0.279	0.213	1	ENSMUSG00000001123
Gne	0.000314018	0.0249215	0.049	0.029	1	ENSMUSG00000028479
Gm10132	0.000315886	-0.089564	0.315	0.343	1	ENSMUSG00000063556
Gm9774	0.000316034	0.00936063	0.142	0.102	1	ENSMUSG00000042165
Apbb1ip	0.000316747	0.0221975	0.066	0.041	1	ENSMUSG00000026786
B4galt1	0.000319049	0.0256699	0.302	0.23	1	ENSMUSG00000028413
Ddr2	0.00031956	0.0693526	0.631	0.506	1	ENSMUSG00000026674
Adamtsl4	0.000321121	0.0237172	0.075	0.048	1	ENSMUSG00000015850
Plxnd1	0.000321812	0.0326299	0.33	0.254	1	ENSMUSG00000030123
Tmem63a	0.000322402	0.0243743	0.09	0.06	1	ENSMUSG00000026519
Ube2v1	0.000324376	0.0162346	0.275	0.214	1	ENSMUSG00000078923
Ino80b	0.000326871	0.0259817	0.076	0.049	1	ENSMUSG00000030034
Eapp	0.000328212	0.0309008	0.202	0.153	1	ENSMUSG00000054302
Atp6ap2	0.000328586	0.0345223	0.39	0.3	1	ENSMUSG00000031007
Ndufaf7	0.000329126	0.0207136	0.051	0.029	1	ENSMUSG00000024082
2210013O21Rik	0.000331496	0.0205979	0.241	0.18	1	ENSMUSG00000086316
Trmt6	0.000332544	0.0156565	0.095	0.063	1	ENSMUSG00000037376
Pcif1	0.00033335	0.0259601	0.169	0.124	1	ENSMUSG00000039849
Palm	0.00033349	0.0244852	0.055	0.033	1	ENSMUSG00000035863
Cntnap1	0.00033401	0.0231693	0.026	0.011	1	ENSMUSG00000017167
Gm12366	0.000334218	-0.0223148	0.103	0.132	1	ENSMUSG00000082762
Golga5	0.000335364	0.0231865	0.132	0.094	1	ENSMUSG00000021192
Eef1d	0.000335844	-0.0923989	0.458	0.442	1	ENSMUSG00000055762
Lpcat3	0.00033656	0.0293197	0.248	0.189	1	ENSMUSG00000004270
Mea1	0.000337264	0.0220386	0.146	0.105	1	ENSMUSG00000002768
Esrra	0.000337808	0.0204176	0.073	0.047	1	ENSMUSG00000024955
Gm13340	0.000338718	0.0240982	0.128	0.091	1	ENSMUSG00000083563
Gm42742	0.000340132	0.014686	0.066	0.041	1	ENSMUSG00000107068
Mrps35	0.000343161	0.0210102	0.117	0.082	1	ENSMUSG00000040112
Sin3b	0.000343185	0.0211167	0.178	0.131	1	ENSMUSG00000031622
Mcph1	0.000343503	0.0199888	0.029	0.013	1	ENSMUSG00000039842
Retreg3	0.000343509	0.0238463	0.16	0.117	1	ENSMUSG00000017802
Ehd4	0.000344409	0.0154304	0.108	0.074	1	ENSMUSG00000027293
Ssb	0.000344624	-0.0779444	0.529	0.502	1	ENSMUSG00000068882
Ier3	0.000345769	0.0274595	0.056	0.034	1	ENSMUSG00000003541
Gm15920	0.000346638	0.01518	0.186	0.139	1	ENSMUSG00000080893
Galc	0.000348038	0.0161632	0.029	0.013	1	ENSMUSG00000021003
Magt1	0.000350336	-0.090732	0.473	0.452	1	ENSMUSG00000031232
Gm17383	0.000350697	-0.0316926	0.046	0.069	1	ENSMUSG00000058625
Tmem53	0.000350726	0.0246351	0.056	0.034	1	ENSMUSG00000048772
Itsn1	0.000350812	0.0318635	0.249	0.191	1	ENSMUSG00000022957
Edem2	0.000352019	0.0202499	0.084	0.056	1	ENSMUSG00000038312
Pcgf5	0.000353356	-0.082296	0.075	0.1	1	ENSMUSG00000024805
Atpaf2	0.000354618	0.019881	0.07	0.045	1	ENSMUSG00000042709
Smc2	0.00035552	-0.0511291	0.029	0.047	1	ENSMUSG00000028312
Thoc6	0.000358344	0.0224824	0.068	0.043	1	ENSMUSG00000041319
Psmb4	0.000358567	0.0506483	0.48	0.378	1	ENSMUSG00000005779
Gm7204	0.00035911	-0.0263826	0.022	0.039	1	ENSMUSG00000048164
Mtmr2	0.000359158	0.0244945	0.152	0.111	1	ENSMUSG00000031918
Gm14400	0.000359349	-0.00891766	0.009	0.021	1	ENSMUSG00000083817
Cacng7	0.000359384	-0.051351	0.032	0.052	1	ENSMUSG00000069806
Srrd	0.000360443	0.0166626	0.029	0.014	1	ENSMUSG00000029346
Fam46c	0.000360725	0.0161942	0.022	0.009	1	ENSMUSG00000044468
Psat1	0.000363063	0.0206132	0.026	0.012	1	ENSMUSG00000024640
Lrrc58	0.000363869	-0.0510871	0.705	0.656	1	ENSMUSG00000034158
St8sia6	0.000365491	-0.0144916	0.002	0.008	1	ENSMUSG00000003418
Katnb1	0.00036633	0.0154326	0.02	0.007	1	ENSMUSG00000031787
Xpa	0.000366939	0.0248532	0.127	0.091	1	ENSMUSG00000028329
Ptges3-ps	0.000367245	-0.0196038	0.01	0.022	1	ENSMUSG00000040078
Dnlz	0.000371097	0.0199839	0.142	0.102	1	ENSMUSG00000075467
Arl6ip4	0.000371828	0.0235198	0.16	0.117	1	ENSMUSG00000029404
Kansl1l	0.00037188	-0.0600778	0.042	0.063	1	ENSMUSG00000026004
Slit2	0.00037258	0.0240022	0.134	0.096	1	ENSMUSG00000031558
Treml1	0.000373192	-0.0122348	0.001	0.007	1	ENSMUSG00000023993
Mrps17	0.000374335	0.0259962	0.236	0.179	1	ENSMUSG00000034211
Nab2	0.000377359	0.0267604	0.131	0.094	1	ENSMUSG00000025402
Cox7a2	0.000378479	0.037949	0.302	0.236	1	ENSMUSG00000032330
Hmga1	0.000379457	0.0212429	0.081	0.054	1	ENSMUSG00000046711
1810013L24Rik	0.000380101	0.0278634	0.206	0.155	1	ENSMUSG00000022507
H2-T10	0.000381306	0.0186975	0.085	0.057	1	ENSMUSG00000079491
Lmf2	0.00038434	0.0292967	0.113	0.08	1	ENSMUSG00000022614
Naxd	0.00038446	0.0361321	0.325	0.254	1	ENSMUSG00000031505
Prpf8	0.000391176	0.0395667	0.391	0.304	1	ENSMUSG00000020850
Tspan4	0.000391718	0.0282083	0.308	0.237	1	ENSMUSG00000025511
Eprs	0.000394911	0.0337987	0.359	0.278	1	ENSMUSG00000026615
Flot1	0.000395681	0.0223459	0.184	0.136	1	ENSMUSG00000059714
Snhg1	0.000395875	0.0198532	0.131	0.093	1	ENSMUSG00000108414
Ptpru	0.000396057	0.0149785	0.018	0.006	1	ENSMUSG00000028909
Cops7b	0.000397889	0.0228525	0.076	0.049	1	ENSMUSG00000026240
Fmnl3	0.000398218	0.0267662	0.137	0.099	1	ENSMUSG00000023008
Elovl5	0.000401202	0.0188109	0.148	0.107	1	ENSMUSG00000032349
Fez2	0.000404709	0.0197196	0.169	0.124	1	ENSMUSG00000056121
Ggact	0.000406107	0.0252886	0.269	0.204	1	ENSMUSG00000041625
Slc22a17	0.000406112	0.0207607	0.128	0.091	1	ENSMUSG00000022199
Rps2-ps13	0.000406698	-0.027475	0.207	0.238	1	ENSMUSG00000081684
Inf2	0.000406911	0.0166088	0.016	0.005	1	ENSMUSG00000037679
Ufl1	0.000407011	0.0231012	0.16	0.118	1	ENSMUSG00000040359
Prdx6	0.000410226	0.0271499	0.264	0.202	1	ENSMUSG00000026701
Tmem50b	0.000411071	0.021974	0.205	0.153	1	ENSMUSG00000022964
53658	0.000411198	-0.0595715	0.09	0.116	1	NA
Ube2i	0.000411673	0.0217399	0.252	0.195	1	ENSMUSG00000015120
Tex264	0.000411917	0.0202143	0.194	0.144	1	ENSMUSG00000040813
Tapbp	0.000413099	-0.0220074	0.806	0.732	1	ENSMUSG00000024308
Krtcap2	0.000418848	-0.0415045	0.683	0.613	1	ENSMUSG00000042747
Eif2b2	0.000421171	0.0199896	0.046	0.027	1	ENSMUSG00000004788
Mmp9	0.00042131	0.0183027	0.021	0.008	1	ENSMUSG00000017737
Anxa7	0.000422236	0.0225016	0.294	0.223	1	ENSMUSG00000021814
Ndufb2	0.000423514	0.0183164	0.253	0.192	1	ENSMUSG00000002416
Tollip	0.000424151	0.0192002	0.139	0.1	1	ENSMUSG00000025139
Irf2bp2	0.000425739	0.0546357	0.567	0.443	1	ENSMUSG00000051495
Gm20431	0.000426777	0.0164125	0.264	0.205	1	ENSMUSG00000089739
Ap3d1	0.000427229	0.0342636	0.355	0.278	1	ENSMUSG00000020198
Oaz2	0.00042869	0.0277902	0.226	0.171	1	ENSMUSG00000040652
Tmem208	0.000429101	0.0260907	0.115	0.082	1	ENSMUSG00000014856
Ndufs6	0.000430349	0.0213676	0.223	0.17	1	ENSMUSG00000021606
Cyp2u1	0.000431834	0.0185376	0.028	0.013	1	ENSMUSG00000027983
Ankrd40	0.000433109	0.029485	0.271	0.208	1	ENSMUSG00000020864
Rcan3	0.000434143	0.0212993	0.043	0.024	1	ENSMUSG00000059713
Mbtps1	0.000434861	0.0337145	0.344	0.269	1	ENSMUSG00000031835
Gm10420	0.000435561	-0.0175739	0.109	0.137	1	ENSMUSG00000072789
Gm45396	0.000436395	0.0160206	0.028	0.013	1	ENSMUSG00000110332
Tmem170b	0.000437631	0.0197361	0.042	0.023	1	ENSMUSG00000087370
[truncated: 18,089 more rows]

## Sheet: mpMSC
gene_name	p_val	avg_log2FC	pct.1	pct.2	p_val_adj	ensembl
Gm42418	2.55452e-37	-0.344548	0.998	1	5.13151e-33	ENSMUSG00000098178
mt-Nd5	1.99022e-29	-0.286215	0.994	0.993	3.99795e-25	ENSMUSG00000064367
mt-Atp8	2.25696e-29	-0.31428	0.977	0.996	4.53378e-25	ENSMUSG00000064356
mt-Nd4l	1.11757e-27	-0.272689	0.998	0.996	2.24497e-23	ENSMUSG00000065947
Gm10222	4.6478e-27	-0.295924	0.969	0.996	9.33651e-23	ENSMUSG00000067736
mt-Nd2	3.06834e-26	-0.221799	1	0.996	6.16368e-22	ENSMUSG00000064345
mt-Rnr1	1.32599e-24	-0.289587	0.996	0.996	2.66364e-20	ENSMUSG00000064337
Cfh	4.94667e-24	-0.229462	0.998	0.996	9.93688e-20	ENSMUSG00000026365
Tnc	1.41765e-23	-0.189801	0.994	0.981	2.84777e-19	ENSMUSG00000028364
mt-Cytb	2.58898e-23	-0.204	1	1	5.20075e-19	ENSMUSG00000064370
mt-Nd4	1.71626e-22	-0.210389	1	0.996	3.44762e-18	ENSMUSG00000064363
mt-Co1	5.16931e-22	-0.196815	1	1	1.03841e-17	ENSMUSG00000064351
Cst3	5.52745e-22	-0.245161	0.998	0.989	1.11035e-17	ENSMUSG00000027447
Ptma	2.13137e-20	-0.177357	0.996	0.993	4.2815e-16	ENSMUSG00000026238
mt-Nd1	5.85695e-20	-0.189958	1	0.996	1.17654e-15	ENSMUSG00000064341
Cp	5.1605e-19	-0.217476	0.981	0.989	1.03664e-14	ENSMUSG00000003617
Gm10925	2.3235e-18	-0.223052	1	0.996	4.66744e-14	ENSMUSG00000100862
mt-Atp6	8.98347e-18	-0.188166	1	0.996	1.8046e-13	ENSMUSG00000064357
mt-Rnr2	1.06001e-17	-0.24233	0.998	1	2.12935e-13	ENSMUSG00000064339
Tpt1	7.66708e-17	-0.181171	0.992	0.993	1.54016e-12	ENSMUSG00000060126
mt-Co2	1.05714e-16	-0.184603	1	0.996	2.12358e-12	ENSMUSG00000064354
B2m	2.6679e-16	-0.18279	0.992	1	5.35927e-12	ENSMUSG00000060802
Serpine2	3.64978e-15	-0.175412	0.998	0.981	7.33168e-11	ENSMUSG00000026249
Nedd4	4.13616e-15	-0.139317	0.992	0.967	8.30873e-11	ENSMUSG00000032216
mt-Co3	5.67966e-15	-0.200108	1	0.996	1.14093e-10	ENSMUSG00000064358
H3f3a	9.03603e-15	-0.198759	0.956	0.922	1.81516e-10	ENSMUSG00000060743
Sparc	1.62575e-14	-0.159621	1	1	3.2658e-10	ENSMUSG00000018593
Bgn	1.75545e-14	-0.155179	0.981	0.978	3.52634e-10	ENSMUSG00000031375
Itm2b	3.47674e-14	-0.150759	0.987	0.981	6.98408e-10	ENSMUSG00000022108
Eef1a1	6.70566e-14	-0.142182	1	0.996	1.34703e-09	ENSMUSG00000037742
Col1a2	1.25355e-13	-0.179662	0.998	1	2.51813e-09	ENSMUSG00000029661
Cd63	4.96596e-13	-0.158168	0.987	0.993	9.97563e-09	ENSMUSG00000025351
Cdh11	6.23675e-13	-0.135856	0.992	0.974	1.25284e-08	ENSMUSG00000031673
Gm28661	2.04212e-12	-0.340569	1	0.996	4.10221e-08	ENSMUSG00000102070
Gm28437	4.7358e-12	-0.253967	0.962	0.963	9.51327e-08	ENSMUSG00000101111
Col1a1	7.78424e-12	-0.284695	0.96	0.955	1.5637e-07	ENSMUSG00000001506
Ctnnb1	1.16539e-11	-0.167403	0.987	0.955	2.34103e-07	ENSMUSG00000006932
Gm28438	1.87004e-11	-0.281523	0.954	0.974	3.75653e-07	ENSMUSG00000101939
Gnas	4.98412e-11	-0.123789	0.998	0.993	1.00121e-06	ENSMUSG00000027523
Laptm4a	6.6557e-11	-0.126598	0.994	0.981	1.337e-06	ENSMUSG00000020585
mt-Nd3	2.23918e-10	-0.153609	1	0.996	4.49807e-06	ENSMUSG00000064360
Rps28	3.43305e-10	-0.190155	0.948	0.941	6.89632e-06	ENSMUSG00000067288
Mmp13	4.58005e-10	-0.25638	0.887	0.87	9.2004e-06	ENSMUSG00000050578
App	6.31032e-10	-0.130642	0.992	0.978	1.26762e-05	ENSMUSG00000022892
Ddx5	6.49883e-10	-0.16686	0.883	0.862	1.30548e-05	ENSMUSG00000020719
Zfp36l1	9.37243e-10	-0.179078	0.891	0.859	1.88273e-05	ENSMUSG00000021127
Marcks	1.63818e-09	-0.103252	0.998	0.985	3.29077e-05	ENSMUSG00000069662
Lamp2	2.45374e-09	-0.15452	0.912	0.874	4.92908e-05	ENSMUSG00000016534
Prss34	2.57301e-09	-0.192147	0.004	0.086	5.16866e-05	ENSMUSG00000056399
Maf	2.58087e-09	-0.199703	0.898	0.87	5.18446e-05	ENSMUSG00000055435
Sh3bgrl	6.38309e-09	-0.220488	0.749	0.74	0.000128224	ENSMUSG00000031246
Rps8	6.73407e-09	-0.138248	0.99	0.97	0.000135274	ENSMUSG00000047675
Calm2	8.54463e-09	-0.244253	0.77	0.747	0.000171645	ENSMUSG00000036438
Loxl2	1.12095e-08	0.266871	0.482	0.26	0.000225176	ENSMUSG00000034205
Fth1	1.19981e-08	-0.123106	0.987	0.97	0.000241017	ENSMUSG00000024661
Olfml3	1.4015e-08	-0.139984	0.973	0.959	0.000281533	ENSMUSG00000027848
Rps29	1.94785e-08	-0.1169	0.987	0.948	0.000391284	ENSMUSG00000034892
Timp2	2.00399e-08	-0.129166	0.95	0.941	0.000402562	ENSMUSG00000017466
Lifr	2.80373e-08	-0.199712	0.852	0.836	0.000563213	ENSMUSG00000054263
Hsp90ab1	7.19226e-08	-0.0952826	0.985	0.955	0.00144478	ENSMUSG00000023944
Cfl1	9.84915e-08	-0.105465	0.992	1	0.0019785	ENSMUSG00000056201
Thbs1	1.03608e-07	0.236458	0.313	0.13	0.00208128	ENSMUSG00000040152
Pdk4	1.1424e-07	0.242358	0.582	0.331	0.00229484	ENSMUSG00000019577
Alpl	1.19777e-07	-0.163336	0.887	0.851	0.00240607	ENSMUSG00000028766
Rps26	1.62145e-07	-0.119586	0.983	0.955	0.00325716	ENSMUSG00000025362
Hnrnpa2b1	1.74809e-07	-0.13832	0.942	0.933	0.00351156	ENSMUSG00000004980
Dusp1	1.88599e-07	0.166564	0.171	0.037	0.00378857	ENSMUSG00000024190
Plod2	1.97306e-07	-0.279148	0.62	0.662	0.00396349	ENSMUSG00000032374
Cdc42	2.0605e-07	-0.115211	0.937	0.881	0.00413914	ENSMUSG00000006699
Tpm1	2.61465e-07	-0.101955	0.998	0.993	0.00525231	ENSMUSG00000032366
Angptl4	2.90513e-07	0.17615	0.315	0.13	0.00583583	ENSMUSG00000002289
Fam129b	3.19815e-07	0.174662	0.34	0.149	0.00642445	ENSMUSG00000026796
Tgm2	3.37502e-07	0.21905	0.459	0.238	0.00677974	ENSMUSG00000037820
Npm1	3.64283e-07	-0.169665	0.804	0.77	0.00731773	ENSMUSG00000057113
Kctd12	4.16526e-07	-0.175615	0.889	0.874	0.00836717	ENSMUSG00000098557
Gm10175	4.74343e-07	-0.186708	0.754	0.77	0.00952861	ENSMUSG00000066724
Cadm1	4.94145e-07	-0.369618	0.453	0.554	0.00992639	ENSMUSG00000032076
Cyfip2	6.18198e-07	-0.292049	0.221	0.364	0.0124184	ENSMUSG00000020340
Hmgb1	6.6064e-07	-0.213493	0.833	0.848	0.0132709	ENSMUSG00000066551
Rps12-ps3	6.74305e-07	-0.250796	0.747	0.855	0.0135454	ENSMUSG00000067038
H2-D1	8.09123e-07	-0.124885	0.979	0.989	0.0162537	ENSMUSG00000073411
Rps6ka3	8.63866e-07	0.181876	0.451	0.227	0.0173533	ENSMUSG00000031309
Wif1	9.20484e-07	-0.19206	0.896	0.914	0.0184907	ENSMUSG00000020218
Rps12l1	1.25323e-06	-0.24714	0.612	0.747	0.0251749	ENSMUSG00000078087
Csf1	1.28868e-06	-0.142085	0.916	0.855	0.0258871	ENSMUSG00000014599
Fap	1.30919e-06	-0.122138	0.9	0.833	0.026299	ENSMUSG00000000392
Atp5g2	1.45789e-06	-0.17706	0.77	0.777	0.029286	ENSMUSG00000062683
Tmem178	1.5264e-06	0.12888	0.157	0.037	0.0306623	ENSMUSG00000024245
Serpinh1	1.68819e-06	-0.110415	0.981	0.955	0.0339124	ENSMUSG00000070436
Rpl23	1.77454e-06	-0.117241	0.977	0.952	0.035647	ENSMUSG00000071415
Eid1	1.87709e-06	-0.154962	0.756	0.706	0.0377071	ENSMUSG00000091337
Acta2	1.90997e-06	0.153246	0.104	0.011	0.0383676	ENSMUSG00000035783
Rps24	2.17098e-06	-0.112502	0.965	0.929	0.0436107	ENSMUSG00000025290
Ftl1	2.23304e-06	-0.0916723	0.99	0.97	0.0448572	ENSMUSG00000050708
Ptprz1	2.34265e-06	-0.296225	0.113	0.23	0.0470591	ENSMUSG00000068748
Tmsb4x	2.5806e-06	-0.0965107	0.994	0.967	0.051839	ENSMUSG00000049775
Slc1a5	2.65848e-06	0.210693	0.38	0.197	0.0534035	ENSMUSG00000001918
Slc40a1	2.96037e-06	-0.284517	0.34	0.454	0.059468	ENSMUSG00000025993
Shox2	3.02181e-06	-0.224441	0.639	0.662	0.0607022	ENSMUSG00000027833
Fn1	3.19226e-06	0.246424	0.597	0.394	0.0641261	ENSMUSG00000026193
Slc20a2	3.20749e-06	0.217906	0.66	0.416	0.0644321	ENSMUSG00000037656
Tmsb10	3.73544e-06	-0.110962	0.96	0.933	0.0750375	ENSMUSG00000079523
Cyb5b	3.98325e-06	0.169965	0.351	0.171	0.0800155	ENSMUSG00000031924
Rpl4	4.52739e-06	-0.126247	0.896	0.851	0.0909462	ENSMUSG00000032399
Rpl39	4.82023e-06	-0.113379	0.954	0.926	0.0968288	ENSMUSG00000079641
Akr1b3	4.91221e-06	0.169908	0.405	0.208	0.0986764	ENSMUSG00000001642
Col10a1	5.2526e-06	0.134369	0.134	0.03	0.105514	ENSMUSG00000039462
Tsnax	5.39208e-06	0.139647	0.301	0.138	0.108316	ENSMUSG00000056820
Tomm40	5.55776e-06	0.129379	0.207	0.074	0.111644	ENSMUSG00000002984
Rps3a1	5.7989e-06	-0.111325	0.977	0.896	0.116488	ENSMUSG00000028081
Rpl41	5.91531e-06	-0.119885	0.996	0.981	0.118827	ENSMUSG00000093674
Mark1	6.00623e-06	0.127513	0.234	0.093	0.120653	ENSMUSG00000026620
Dapk1	6.12639e-06	0.173913	0.361	0.182	0.123067	ENSMUSG00000021559
Vcl	7.11664e-06	0.183026	0.564	0.342	0.142959	ENSMUSG00000021823
Serpina3g	7.33935e-06	0.166778	0.351	0.171	0.147433	ENSMUSG00000041481
Col4a2	7.62583e-06	0.207556	0.545	0.331	0.153188	ENSMUSG00000031503
Rras	7.67307e-06	0.160067	0.457	0.245	0.154137	ENSMUSG00000038387
Pdia3	8.01661e-06	-0.119928	0.9	0.87	0.161038	ENSMUSG00000027248
Ddx17	8.01903e-06	-0.164615	0.752	0.706	0.161086	ENSMUSG00000055065
Selenof	9.21559e-06	-0.0927965	0.933	0.885	0.185123	ENSMUSG00000037072
Rps6-ps4	9.86611e-06	-0.236823	0.482	0.61	0.19819	ENSMUSG00000081406
Adgre5	9.90775e-06	0.152157	0.244	0.108	0.199027	ENSMUSG00000002885
Msmo1	1.0616e-05	0.126412	0.167	0.052	0.213253	ENSMUSG00000031604
Basp1	1.09756e-05	0.20704	0.62	0.416	0.220478	ENSMUSG00000045763
Rpl32	1.14433e-05	-0.145162	0.86	0.814	0.229873	ENSMUSG00000057841
Ece1	1.15073e-05	0.155436	0.307	0.149	0.231158	ENSMUSG00000057530
Gpx3	1.16941e-05	-0.174734	0.891	0.874	0.234912	ENSMUSG00000018339
Plat	1.17164e-05	0.136801	0.167	0.052	0.235359	ENSMUSG00000031538
Nt5e	1.23595e-05	0.12397	0.134	0.033	0.248278	ENSMUSG00000032420
Mta3	1.48627e-05	0.102322	0.106	0.019	0.298561	ENSMUSG00000055817
Lamp1	1.58566e-05	-0.124759	0.852	0.81	0.318527	ENSMUSG00000031447
AC107755.1	1.59435e-05	0.128603	0.215	0.086	0.320274	ENSMUSG00000111556
Gm15459	1.6323e-05	-0.197703	0.43	0.55	0.327897	ENSMUSG00000100801
Sh3bgrl3	1.64101e-05	0.147876	0.436	0.234	0.329645	ENSMUSG00000028843
Colec12	1.7947e-05	-0.104907	0.942	0.877	0.36052	ENSMUSG00000036103
Morf4l1	1.79555e-05	-0.0704214	0.967	0.907	0.36069	ENSMUSG00000062270
Col4a1	1.79569e-05	0.230607	0.678	0.476	0.360718	ENSMUSG00000031502
Spon2	1.85172e-05	0.116735	0.117	0.026	0.371973	ENSMUSG00000037379
Bcar1	1.89988e-05	0.126987	0.207	0.082	0.381648	ENSMUSG00000031955
Tuba1c	1.9602e-05	0.21137	0.818	0.569	0.393766	ENSMUSG00000043091
Loxl3	2.02524e-05	0.160181	0.453	0.26	0.40683	ENSMUSG00000000693
Nkd2	2.14351e-05	0.167663	0.205	0.086	0.430588	ENSMUSG00000021567
Vdr	2.2908e-05	-0.233889	0.676	0.673	0.460176	ENSMUSG00000022479
Hnrnpu	2.36246e-05	-0.138002	0.783	0.736	0.474571	ENSMUSG00000039630
Hist1h2ao	2.47294e-05	-0.0477436	0.017	0.078	0.496763	ENSMUSG00000094248
Hist1h2ap	2.47294e-05	-0.0477436	0.017	0.078	0.496763	ENSMUSG00000094777
Slitrk6	2.50846e-05	-0.295446	0.165	0.268	0.503899	ENSMUSG00000045871
Rps5	2.65394e-05	-0.122301	0.916	0.877	0.533124	ENSMUSG00000012848
Tmem59	2.66353e-05	-0.0788161	0.987	0.929	0.535051	ENSMUSG00000028618
Ckb	2.81602e-05	0.150416	0.509	0.301	0.565682	ENSMUSG00000001270
Ibsp	2.82296e-05	-0.172961	0.889	0.862	0.567076	ENSMUSG00000029306
2004-09-01	2.8382e-05	0.153579	0.534	0.312	0.570138	ENSMUSG00000020486
Clic1	2.96061e-05	0.143514	0.349	0.182	0.594727	ENSMUSG00000007041
Kitl	2.9841e-05	-0.23078	0.651	0.684	0.599445	ENSMUSG00000019966
Actb	2.99361e-05	-0.0584008	1	0.996	0.601356	ENSMUSG00000029580
Ppbp	3.11648e-05	-0.106764	0.008	0.059	0.626039	ENSMUSG00000029372
Vangl2	3.28335e-05	0.117225	0.138	0.041	0.659559	ENSMUSG00000026556
Ext1	3.40722e-05	0.146196	0.37	0.201	0.684442	ENSMUSG00000061731
Idi1	3.43314e-05	0.0899945	0.127	0.033	0.68965	ENSMUSG00000058258
Gm15500	3.51355e-05	-0.163698	0.848	0.862	0.705802	ENSMUSG00000086583
Cd24a	3.68613e-05	-0.0987874	0.01	0.063	0.740471	ENSMUSG00000047139
Gm28043	3.75295e-05	0.0731439	0.171	0.059	0.753893	ENSMUSG00000098374
Adgra2	3.80663e-05	0.147608	0.33	0.167	0.764676	ENSMUSG00000031486
Reck	3.94454e-05	0.141203	0.288	0.145	0.79238	ENSMUSG00000028476
Ptx3	3.99482e-05	0.162247	0.19	0.078	0.802479	ENSMUSG00000027832
Col13a1	4.25094e-05	-0.227395	0.061	0.145	0.853929	ENSMUSG00000058806
Wsb2	5.01593e-05	0.126221	0.265	0.126	1	ENSMUSG00000029364
Zdhhc3	5.15098e-05	0.126406	0.269	0.13	1	ENSMUSG00000025786
Aldh1a2	5.24915e-05	0.18753	0.305	0.156	1	ENSMUSG00000013584
Ubb	5.2857e-05	-0.094138	0.985	0.967	1	ENSMUSG00000019505
Rpl18a	5.49021e-05	-0.157204	0.812	0.781	1	ENSMUSG00000045128
Akr1b8	5.49722e-05	0.0793164	0.125	0.033	1	ENSMUSG00000029762
Elf4	5.53267e-05	0.0886843	0.173	0.063	1	ENSMUSG00000031103
Lamc1	5.57434e-05	0.194283	0.724	0.48	1	ENSMUSG00000026478
Slc38a10	5.67216e-05	0.143027	0.445	0.26	1	ENSMUSG00000061306
Serbp1	5.83531e-05	-0.107411	0.854	0.796	1	ENSMUSG00000036371
Dtnbp1	6.06741e-05	0.13607	0.322	0.167	1	ENSMUSG00000057531
Myadm	6.35794e-05	0.163973	0.718	0.465	1	ENSMUSG00000068566
Ano1	6.42081e-05	0.14648	0.192	0.078	1	ENSMUSG00000031075
Rpl35	6.55534e-05	-0.126792	0.937	0.896	1	ENSMUSG00000062997
Rbm39	6.58309e-05	-0.161324	0.735	0.677	1	ENSMUSG00000027620
Hgsnat	6.69999e-05	0.121408	0.37	0.201	1	ENSMUSG00000037260
Ctsb	6.71086e-05	-0.0989962	0.969	0.944	1	ENSMUSG00000021939
Limch1	6.78419e-05	-0.140344	0.846	0.848	1	ENSMUSG00000037736
Rpl10-ps5	7.05208e-05	-0.0652422	0.027	0.093	1	ENSMUSG00000110679
H2-K1	7.11927e-05	-0.112959	0.956	0.952	1	ENSMUSG00000061232
Foxp1	7.32954e-05	0.140977	0.411	0.23	1	ENSMUSG00000030067
AC121872.2	7.3621e-05	-0.0583494	0.025	0.089	1	ENSMUSG00000113625
Gm9493	7.78713e-05	-0.132034	0.152	0.268	1	ENSMUSG00000044424
Suclg1	8.11023e-05	0.12542	0.376	0.204	1	ENSMUSG00000052738
Il1rl2	8.14151e-05	0.111402	0.19	0.078	1	ENSMUSG00000070942
Igsf8	8.38389e-05	0.115732	0.38	0.212	1	ENSMUSG00000038034
Zeb2	8.42587e-05	-0.134904	0.823	0.788	1	ENSMUSG00000026872
Runx1	8.43573e-05	-0.219253	0.559	0.565	1	ENSMUSG00000022952
Acaa2	8.86303e-05	0.118628	0.196	0.082	1	ENSMUSG00000036880
Rps13-ps1	8.89686e-05	-0.092605	0.096	0.197	1	ENSMUSG00000066362
Insig1	9.49748e-05	0.121127	0.355	0.193	1	ENSMUSG00000045294
Cd302	9.85742e-05	-0.115358	0.816	0.755	1	ENSMUSG00000060703
AI846148	9.90614e-05	0.088858	0.134	0.041	1	ENSMUSG00000024970
Gm12918	0.000100892	-0.1611	0.19	0.316	1	ENSMUSG00000066315
Gnb4	0.000106361	0.117556	0.349	0.19	1	ENSMUSG00000027669
Ifitm2	0.000106378	-0.133022	0.852	0.796	1	ENSMUSG00000060591
Slc2a3	0.000117653	0.0894237	0.171	0.067	1	ENSMUSG00000003153
Sult1a1	0.000117744	0.118049	0.188	0.078	1	ENSMUSG00000030711
Eif1	0.000124586	-0.101209	0.927	0.848	1	ENSMUSG00000035530
Cadps2	0.000126423	-0.118359	0.023	0.082	1	ENSMUSG00000017978
Mfap2	0.000127075	0.124848	0.386	0.216	1	ENSMUSG00000060572
Postn	0.000129727	-0.309666	0.361	0.45	1	ENSMUSG00000027750
Mcpt8	0.000130484	-0.0657967	0.002	0.037	1	ENSMUSG00000022157
Nubp2	0.000134298	0.105109	0.184	0.078	1	ENSMUSG00000039183
Csrnp3	0.00013612	0.11299	0.19	0.082	1	ENSMUSG00000044647
Rpl10-ps1	0.000136459	-0.0654151	0.031	0.097	1	ENSMUSG00000080859
Hnrnpc	0.000138531	-0.147055	0.775	0.74	1	ENSMUSG00000060373
Tagln	0.000139049	0.135988	0.102	0.026	1	ENSMUSG00000032085
Nudt7	0.000139272	0.0800423	0.084	0.015	1	ENSMUSG00000031767
Sdc2	0.000140859	-0.0990031	0.91	0.851	1	ENSMUSG00000022261
Fyco1	0.000148365	0.0930964	0.18	0.071	1	ENSMUSG00000025241
Hs3st4	0.000150012	-0.0769087	0	0.03	1	ENSMUSG00000078591
Hs3st5	0.000150012	-0.0576252	0	0.03	1	ENSMUSG00000044499
AC156568.1	0.000150012	-0.0194529	0	0.03	1	ENSMUSG00000113059
Rps13-ps4	0.000152479	-0.10213	0.092	0.186	1	ENSMUSG00000081378
Srebf2	0.000153277	0.111814	0.299	0.156	1	ENSMUSG00000022463
Pigyl	0.000153508	0.0934327	0.349	0.186	1	ENSMUSG00000010607
Rps3	0.000155486	-0.1016	0.921	0.855	1	ENSMUSG00000030744
Sec61a1	0.000155969	0.129387	0.438	0.264	1	ENSMUSG00000030082
0610010F05Rik	0.000156525	0.0746574	0.117	0.033	1	ENSMUSG00000042208
Pdlim4	0.000157982	0.102031	0.192	0.082	1	ENSMUSG00000020388
4931406P16Rik	0.000165011	0.105788	0.301	0.156	1	ENSMUSG00000066571
Serpina12	0.00016744	0.112244	0.18	0.074	1	ENSMUSG00000041567
Csgalnact2	0.00016774	0.114728	0.248	0.123	1	ENSMUSG00000042042
Cisd3	0.000172206	0.0726461	0.104	0.026	1	ENSMUSG00000078695
Sema4c	0.000172343	0.0797267	0.251	0.119	1	ENSMUSG00000026121
Tdg	0.00017325	0.0662635	0.213	0.097	1	ENSMUSG00000034674
Itm2c	0.000188445	-0.103159	0.873	0.822	1	ENSMUSG00000026223
Fbn2	0.000190655	0.149648	0.265	0.138	1	ENSMUSG00000024598
Svbp	0.000190974	0.107216	0.309	0.167	1	ENSMUSG00000028643
Cbx6	0.000192086	0.148702	0.514	0.316	1	ENSMUSG00000089715
Mmp9	0.000192521	0.258066	0.251	0.13	1	ENSMUSG00000017737
Rtca	0.000197536	0.111602	0.223	0.108	1	ENSMUSG00000000339
Actg1	0.000203039	-0.0670449	0.992	0.967	1	ENSMUSG00000062825
Mxra8	0.000203082	-0.120187	0.898	0.851	1	ENSMUSG00000029070
CR974589.1	0.000207356	-0.0370946	0.01	0.056	1	ENSMUSG00000112605
Adam9	0.000208494	0.133531	0.47	0.279	1	ENSMUSG00000031555
Tdg-ps	0.000209869	0.0588007	0.144	0.052	1	ENSMUSG00000047347
Dok1	0.000215484	0.074589	0.109	0.03	1	ENSMUSG00000068335
Fdps	0.000219961	0.0731823	0.113	0.033	1	ENSMUSG00000059743
Rflnb	0.000220248	0.110977	0.196	0.089	1	ENSMUSG00000020846
Gm8355	0.000224928	-0.168458	0.367	0.468	1	ENSMUSG00000093798
Lipa	0.000228022	0.106646	0.418	0.245	1	ENSMUSG00000024781
Dnajc3	0.000237795	-0.1328	0.754	0.71	1	ENSMUSG00000022136
Gm5905	0.000237877	-0.142159	0.084	0.171	1	ENSMUSG00000110275
Pappa	0.0002386	0.188405	0.756	0.539	1	ENSMUSG00000028370
Ndufb6	0.000245825	0.119656	0.365	0.208	1	ENSMUSG00000071014
Raver1	0.000255651	0.0440436	0.24	0.119	1	ENSMUSG00000010205
Slc6a6	0.000257553	0.143108	0.403	0.238	1	ENSMUSG00000030096
Ctxn1	0.000257578	0.0945256	0.146	0.056	1	ENSMUSG00000048644
Zfp503	0.000262235	0.114599	0.248	0.126	1	ENSMUSG00000039081
Gtf3c2	0.000262383	0.110527	0.238	0.119	1	ENSMUSG00000106864
Gzme	0.000265431	0.0585828	0.048	0	1	ENSMUSG00000022156
Phgdh	0.000266292	0.0961678	0.152	0.059	1	ENSMUSG00000053398
Rpap1	0.000268394	0.0691144	0.065	0.007	1	ENSMUSG00000034032
Ifitm3	0.000273562	-0.0881502	0.939	0.896	1	ENSMUSG00000025492
Zcchc14	0.000274432	-0.201041	0.426	0.491	1	ENSMUSG00000061410
Ubald1	0.000277415	0.109471	0.351	0.197	1	ENSMUSG00000039568
Klhl24	0.000281096	0.142559	0.649	0.42	1	ENSMUSG00000062901
Axl	0.000281619	0.0994747	0.246	0.123	1	ENSMUSG00000002602
Hpgd	0.000283761	-0.252004	0.317	0.398	1	ENSMUSG00000031613
51633	0.000295698	0.0913688	0.098	0.026	1	NA
Rpl5	0.000300078	-0.121238	0.925	0.914	1	ENSMUSG00000058558
Snx17	0.000300527	0.0949044	0.326	0.178	1	ENSMUSG00000029146
Armcx2	0.000301837	0.117627	0.34	0.193	1	ENSMUSG00000033436
Uqcrc1	0.000307161	0.117126	0.292	0.16	1	ENSMUSG00000025651
Csnk1a1	0.000322455	-0.15049	0.662	0.628	1	ENSMUSG00000024576
Emb	0.000336092	0.145663	0.524	0.349	1	ENSMUSG00000021728
Arf1	0.000338863	-0.0819318	0.939	0.892	1	ENSMUSG00000048076
Stard4	0.000343391	0.0646109	0.123	0.041	1	ENSMUSG00000024378
Gpr153	0.000363586	0.103811	0.405	0.238	1	ENSMUSG00000042804
Sfrp1	0.00036847	0.175367	0.432	0.271	1	ENSMUSG00000031548
Susd2	0.000372553	0.104559	0.225	0.112	1	ENSMUSG00000006342
Dcaf17	0.000374667	0.0928432	0.144	0.056	1	ENSMUSG00000041966
Fos	0.000386044	0.174772	0.516	0.361	1	ENSMUSG00000021250
Dstn	0.000386329	-0.0899929	0.894	0.814	1	ENSMUSG00000015932
Spry1	0.000391596	0.160668	0.382	0.238	1	ENSMUSG00000037211
Por	0.000393428	0.0860428	0.19	0.086	1	ENSMUSG00000005514
Emilin2	0.000393843	0.062352	0.054	0.004	1	ENSMUSG00000024053
Gm2000	0.00039436	-0.217456	0.313	0.416	1	ENSMUSG00000078193
Top1	0.000394434	-0.160781	0.641	0.617	1	ENSMUSG00000070544
Ilk	0.000401732	0.102546	0.353	0.204	1	ENSMUSG00000030890
Slc35b1	0.000406036	0.136432	0.443	0.275	1	ENSMUSG00000020873
Dcaf12	0.000411083	0.0797467	0.205	0.093	1	ENSMUSG00000028436
Fat1	0.00041439	-0.152309	0.681	0.651	1	ENSMUSG00000070047
A430027H14Rik	0.000416616	0.0584344	0.077	0.015	1	ENSMUSG00000104507
Gm15832	0.000416645	0.0770355	0.278	0.149	1	ENSMUSG00000085894
Abhd17a	0.000421511	0.0726124	0.157	0.063	1	ENSMUSG00000003346
Prkab2	0.000425062	0.140955	0.221	0.115	1	ENSMUSG00000038205
Cd200	0.00042793	-0.224252	0.534	0.554	1	ENSMUSG00000022661
Ddah2	0.000428437	0.107454	0.246	0.13	1	ENSMUSG00000007039
Gusb	0.00043024	0.0886081	0.221	0.108	1	ENSMUSG00000025534
Mdp1	0.000439628	0.0864548	0.215	0.104	1	ENSMUSG00000002329
Gabarap	0.000443905	-0.0994139	0.871	0.81	1	ENSMUSG00000018567
L3hypdh	0.000444993	0.0796763	0.106	0.033	1	ENSMUSG00000019718
Rps12-ps4	0.000451238	-0.164788	0.447	0.561	1	ENSMUSG00000109509
Glyr1	0.000452832	0.0827793	0.23	0.112	1	ENSMUSG00000022536
Nsrp1	0.000456348	0.101721	0.257	0.134	1	ENSMUSG00000037958
Isg15	0.000456647	0.0899808	0.125	0.045	1	ENSMUSG00000035692
Gm4332	0.000459152	-0.258966	0.23	0.323	1	ENSMUSG00000106037
Ddx49	0.000469536	0.0710231	0.115	0.037	1	ENSMUSG00000057788
Pgm2	0.000473132	0.0952669	0.159	0.067	1	ENSMUSG00000025791
Rps27rt	0.000481973	-0.14031	0.896	0.874	1	ENSMUSG00000050621
S100a11	0.000488819	-0.0524321	0.979	0.926	1	ENSMUSG00000027907
Ccdc12	0.000496385	-0.213515	0.459	0.491	1	ENSMUSG00000019659
AC163637.2	0.000504618	0.0408337	0.157	0.067	1	ENSMUSG00000111692
Tmem86a	0.000505556	0.152901	0.524	0.353	1	ENSMUSG00000010307
Adgrl2	0.000507634	0.121676	0.482	0.297	1	ENSMUSG00000028184
Lrrc58	0.000507664	-0.127299	0.768	0.721	1	ENSMUSG00000034158
Anxa6	0.000529211	0.152271	0.708	0.472	1	ENSMUSG00000018340
Chd4	0.000542781	-0.145206	0.653	0.665	1	ENSMUSG00000063870
Pcyt1a	0.000543943	0.108824	0.261	0.141	1	ENSMUSG00000005615
Kif1b	0.000550974	0.0931422	0.294	0.164	1	ENSMUSG00000063077
Cmtr1	0.000553055	0.0446408	0.173	0.074	1	ENSMUSG00000024019
Kazald1	0.000553285	0.103876	0.205	0.1	1	ENSMUSG00000025213
Serf1	0.000557917	0.0874196	0.338	0.193	1	ENSMUSG00000021643
Plgrkt	0.000563671	0.0928122	0.15	0.063	1	ENSMUSG00000016495
Psap	0.000572105	-0.072141	0.973	0.933	1	ENSMUSG00000004207
Rpl31	0.000572425	-0.107472	0.929	0.892	1	ENSMUSG00000073702
51669	0.000581467	0.11952	0.328	0.19	1	NA
Sod3	0.000585556	0.11666	0.365	0.208	1	ENSMUSG00000072941
Dhcr24	0.000586557	0.0713806	0.1	0.03	1	ENSMUSG00000034926
Camk2d	0.000595859	0.0776299	0.244	0.126	1	ENSMUSG00000053819
Fgf7	0.000600503	-0.248573	0.217	0.301	1	ENSMUSG00000027208
Rbbp7	0.000602112	0.114916	0.637	0.42	1	ENSMUSG00000031353
Adgrl1	0.000607931	0.123262	0.347	0.208	1	ENSMUSG00000013033
Plxnb2	0.000612822	0.103382	0.315	0.182	1	ENSMUSG00000036606
Pten	0.000616421	-0.117296	0.808	0.758	1	ENSMUSG00000013663
Ifitm5	0.000617003	-0.121358	0.025	0.078	1	ENSMUSG00000025489
Crim1	0.000618176	0.0886368	0.167	0.074	1	ENSMUSG00000024074
Myh9	0.000621927	-0.1105	0.802	0.732	1	ENSMUSG00000022443
Foxs1	0.000638679	0.0932686	0.19	0.089	1	ENSMUSG00000074676
Rpl10-ps6	0.000641951	-0.0365295	0.017	0.063	1	ENSMUSG00000080885
Rai14	0.000645264	0.125629	0.511	0.316	1	ENSMUSG00000022246
Dnal4	0.000653408	0.078871	0.117	0.041	1	ENSMUSG00000022420
Rpl35a	0.0006572	-0.103613	0.927	0.892	1	ENSMUSG00000060636
Hist1h1c	0.000657305	0.140634	0.388	0.238	1	ENSMUSG00000036181
Asphd2	0.00066183	0.0572769	0.058	0.007	1	ENSMUSG00000029348
Dusp23	0.000667367	0.0843643	0.167	0.074	1	ENSMUSG00000026544
Rps13-ps2	0.000671922	-0.1765	0.301	0.416	1	ENSMUSG00000069972
Ywhae	0.000678977	-0.0699777	0.906	0.822	1	ENSMUSG00000020849
Igf2	0.000693658	0.0831498	0.098	0.03	1	ENSMUSG00000048583
Mr1	0.000694859	0.0935961	0.19	0.089	1	ENSMUSG00000026471
S100a6	0.000695534	-0.132751	0.81	0.766	1	ENSMUSG00000001025
Coro1b	0.000696694	0.0794335	0.378	0.23	1	ENSMUSG00000024835
Hist1h2bc	0.000698734	0.142454	0.553	0.361	1	ENSMUSG00000018102
Smad6	0.000701403	0.132924	0.537	0.361	1	ENSMUSG00000036867
Gm3375	0.000705489	0.0441302	0.175	0.078	1	ENSMUSG00000107470
Plod1	0.000715467	0.0696311	0.257	0.138	1	ENSMUSG00000019055
Lpcat3	0.000717259	0.0764781	0.271	0.145	1	ENSMUSG00000004270
Myd88	0.000727749	0.107289	0.257	0.141	1	ENSMUSG00000032508
Lamb1	0.000732155	0.120466	0.511	0.323	1	ENSMUSG00000002900
Itga11	0.000745698	0.115877	0.271	0.152	1	ENSMUSG00000032243
S100a10	0.000750778	0.11795	0.537	0.361	1	ENSMUSG00000041959
Trim35	0.000759171	0.111604	0.392	0.238	1	ENSMUSG00000022043
Selenon	0.000767188	0.0715015	0.184	0.086	1	ENSMUSG00000050989
Fads1	0.000769606	0.1226	0.591	0.379	1	ENSMUSG00000010663
Trp53inp2	0.000772762	0.123542	0.457	0.283	1	ENSMUSG00000038375
Cavin1	0.000775603	0.11507	0.511	0.323	1	ENSMUSG00000004044
Ap2s1	0.000776517	0.0664085	0.182	0.082	1	ENSMUSG00000008036
St3gal6	0.00077703	-0.145916	0.787	0.743	1	ENSMUSG00000022747
Ttyh2	0.000782208	0.0989324	0.188	0.093	1	ENSMUSG00000034714
Bmp4	0.000789048	0.13125	0.23	0.123	1	ENSMUSG00000021835
Tshz1	0.000796764	0.109529	0.338	0.201	1	ENSMUSG00000046982
Ackr4	0.0007991	-0.0963067	0.86	0.799	1	ENSMUSG00000079355
Asb13	0.000803595	0.0595847	0.092	0.026	1	ENSMUSG00000033781
Tnfrsf19	0.000804583	0.156903	0.756	0.543	1	ENSMUSG00000060548
Ptprd	0.000804766	-0.0926907	0.908	0.87	1	ENSMUSG00000028399
Dhrs1	0.000808101	0.104552	0.374	0.227	1	ENSMUSG00000002332
Meaf6	0.000808578	0.084535	0.132	0.052	1	ENSMUSG00000028863
Pparg	0.000812788	0.121335	0.182	0.089	1	ENSMUSG00000000440
Hsp90b1	0.000815512	-0.0668923	0.981	0.941	1	ENSMUSG00000020048
Rps12-ps9	0.000822534	-0.114318	0.324	0.442	1	ENSMUSG00000069862
P3h4	0.00082367	0.0712579	0.194	0.093	1	ENSMUSG00000006931
P4hb	0.000829263	-0.0778133	0.887	0.822	1	ENSMUSG00000025130
Ptprcap	0.000837723	0.0732195	0.378	0.23	1	ENSMUSG00000045826
Eef1b2	0.000840146	-0.114838	0.793	0.725	1	ENSMUSG00000025967
Proser1	0.000862068	0.0766478	0.121	0.045	1	ENSMUSG00000049504
Ndufs5	0.000871745	0.101766	0.549	0.368	1	ENSMUSG00000028648
Adipoq	0.000880565	0.180149	0.39	0.249	1	ENSMUSG00000022878
Eif2s3x	0.000882415	0.0746057	0.257	0.138	1	ENSMUSG00000035150
Eif1ad	0.000886001	0.0732436	0.154	0.067	1	ENSMUSG00000024841
Cib1	0.000894519	0.0730901	0.132	0.052	1	ENSMUSG00000030538
Ntn4	0.000903737	0.069006	0.071	0.015	1	ENSMUSG00000020019
Errfi1	0.000906517	0.140635	0.324	0.201	1	ENSMUSG00000028967
Cd99l2	0.000908812	0.0830283	0.248	0.13	1	ENSMUSG00000035776
Slc35b4	0.000913695	0.0800665	0.248	0.13	1	ENSMUSG00000018999
Wdr86	0.000921672	0.0857873	0.255	0.138	1	ENSMUSG00000055235
Sfxn1	0.000927901	0.118398	0.424	0.26	1	ENSMUSG00000021474
Ktn1	0.000948596	0.12013	0.384	0.242	1	ENSMUSG00000021843
Cby1	0.000953508	0.0678973	0.102	0.033	1	ENSMUSG00000022428
Kng2	0.000962701	0.133727	0.357	0.223	1	ENSMUSG00000060459
Zfp707	0.00096684	0.0522687	0.056	0.007	1	ENSMUSG00000034429
Lrif1	0.000980316	0.0818925	0.148	0.063	1	ENSMUSG00000056260
Atox1	0.000981166	0.0840241	0.384	0.238	1	ENSMUSG00000018585
Ormdl1	0.00098147	0.0398853	0.056	0.007	1	ENSMUSG00000026097
Tars	0.000985519	0.070397	0.196	0.097	1	ENSMUSG00000022241
Mnat1	0.000986152	0.066611	0.351	0.201	1	ENSMUSG00000021103
Trpa1	0.00100663	0.0825578	0.163	0.074	1	ENSMUSG00000032769
Mif	0.00100898	0.0696272	0.294	0.167	1	ENSMUSG00000033307
Impa2	0.00101681	0.0747981	0.14	0.059	1	ENSMUSG00000024525
Snn	0.00101703	0.0949563	0.196	0.1	1	ENSMUSG00000037972
Kank2	0.00102552	-0.172206	0.524	0.55	1	ENSMUSG00000032194
Anxa2	0.0010297	0.147975	0.741	0.535	1	ENSMUSG00000032231
Rassf5	0.00103083	0.0618701	0.084	0.022	1	ENSMUSG00000026430
Tor3a	0.00103254	0.0721201	0.203	0.1	1	ENSMUSG00000060519
Borcs7	0.00103454	0.0785536	0.203	0.1	1	ENSMUSG00000062376
Cpa3	0.00104375	-0.0431244	0	0.022	1	ENSMUSG00000001865
Lrrc56	0.00104375	-0.0325992	0	0.022	1	ENSMUSG00000038637
Fam71b	0.00104375	-0.035567	0	0.022	1	ENSMUSG00000020401
Myl9	0.00105246	0.137304	0.461	0.297	1	ENSMUSG00000067818
Steap4	0.00105491	0.133178	0.543	0.357	1	ENSMUSG00000012428
Inafm2	0.00105812	-0.220996	0.194	0.271	1	ENSMUSG00000074918
Calm1	0.00106623	-0.0870111	0.846	0.792	1	ENSMUSG00000001175
Plscr3	0.00108763	0.100144	0.505	0.32	1	ENSMUSG00000019461
Sec13	0.0010903	0.0989876	0.34	0.201	1	ENSMUSG00000030298
4930533O14Rik	0.00109186	0.0932977	0.182	0.089	1	ENSMUSG00000063904
Usp22	0.00109221	0.102143	0.261	0.149	1	ENSMUSG00000042506
Washc5	0.0010983	0.0878744	0.234	0.126	1	ENSMUSG00000022350
Psmd1	0.0011033	0.0962426	0.407	0.242	1	ENSMUSG00000026229
Tmem51	0.00111775	0.0715073	0.136	0.056	1	ENSMUSG00000040616
AI413582	0.00112036	0.0746466	0.1	0.033	1	ENSMUSG00000062753
Tyw1	0.00112188	0.0636595	0.054	0.007	1	ENSMUSG00000056310
Tnfrsf21	0.001123	0.112303	0.367	0.223	1	ENSMUSG00000023915
Rb1	0.00116237	-0.121921	0.04	0.097	1	ENSMUSG00000022105
Hspa8	0.00116288	-0.147189	0.806	0.829	1	ENSMUSG00000015656
Sf3b5	0.00118586	0.0761567	0.28	0.156	1	ENSMUSG00000078348
Bcl9	0.00119086	0.0727058	0.19	0.093	1	ENSMUSG00000038256
Epn1	0.00119729	0.101987	0.313	0.19	1	ENSMUSG00000035203
Gm29216	0.00121252	-0.000160743	0.159	0.078	1	ENSMUSG00000101249
Tmem175	0.00123496	0.0540407	0.138	0.056	1	ENSMUSG00000013495
Panx3	0.00125708	0.14655	0.284	0.171	1	ENSMUSG00000011118
Myo18a	0.00126026	0.0874933	0.351	0.208	1	ENSMUSG00000000631
Adam17	0.00126229	0.0998357	0.422	0.271	1	ENSMUSG00000052593
Abcd4	0.00126743	0.0818588	0.104	0.037	1	ENSMUSG00000021240
Pepd	0.00127485	0.0681079	0.106	0.037	1	ENSMUSG00000063931
Sft2d1	0.00127875	0.0681742	0.251	0.138	1	ENSMUSG00000073468
Pggt1b	0.0012854	0.0697315	0.253	0.134	1	ENSMUSG00000024477
Mmp19	0.00128938	0.0781627	0.194	0.097	1	ENSMUSG00000025355
Ywhaz	0.00129605	-0.0747152	0.875	0.822	1	ENSMUSG00000022285
Trim8	0.00129933	0.106787	0.509	0.323	1	ENSMUSG00000025034
Cdk5rap1	0.00130344	0.0431327	0.038	0	1	ENSMUSG00000027487
Arpc2	0.00130537	-0.0694902	0.879	0.803	1	ENSMUSG00000006304
Iqgap1	0.00130702	0.107945	0.574	0.372	1	ENSMUSG00000030536
Stk17b	0.00133033	-0.171086	0.599	0.599	1	ENSMUSG00000026094
Nlrc5	0.00133287	0.081088	0.198	0.1	1	ENSMUSG00000074151
Furin	0.00133786	0.101952	0.349	0.223	1	ENSMUSG00000030530
Mfsd14b	0.00134062	0.0860469	0.265	0.149	1	ENSMUSG00000038212
Fgfrl1	0.00138409	0.0841423	0.265	0.149	1	ENSMUSG00000008090
Nek7	0.00138629	-0.212088	0.355	0.409	1	ENSMUSG00000026393
Spg20	0.00139821	0.0785365	0.196	0.1	1	ENSMUSG00000036580
Zyx	0.00141043	0.0814916	0.286	0.164	1	ENSMUSG00000029860
Fasn	0.00141801	0.0569857	0.088	0.026	1	ENSMUSG00000025153
Rpl6	0.00141869	-0.111208	0.942	0.941	1	ENSMUSG00000029614
Npy	0.00141889	-0.125888	0.017	0.059	1	ENSMUSG00000029819
Crlf2	0.00144314	0.0726583	0.092	0.03	1	ENSMUSG00000033467
Htra2	0.00144503	0.0727915	0.184	0.089	1	ENSMUSG00000068329
Tes	0.00144779	0.0603967	0.14	0.059	1	ENSMUSG00000029552
Lepr	0.00145516	0.158945	0.82	0.599	1	ENSMUSG00000057722
Zcchc3	0.0014566	0.0888752	0.152	0.071	1	ENSMUSG00000074682
Gipc1	0.00146322	0.0734348	0.092	0.03	1	ENSMUSG00000019433
Tubgcp4	0.00148411	0.0779818	0.115	0.045	1	ENSMUSG00000027263
Slc25a10	0.00148801	0.0799455	0.152	0.071	1	ENSMUSG00000025792
Rps25	0.00148827	-0.136619	0.906	0.851	1	ENSMUSG00000009927
Hmgn3	0.00149456	0.090654	0.486	0.312	1	ENSMUSG00000066456
Fdx1l	0.00151358	0.036164	0.152	0.071	1	ENSMUSG00000079677
Fzd1	0.00153226	0.0988392	0.265	0.152	1	ENSMUSG00000044674
Col5a3	0.00153705	0.117403	0.328	0.201	1	ENSMUSG00000004098
Tap1	0.00153737	0.0617999	0.192	0.093	1	ENSMUSG00000037321
Pgm1	0.00153955	0.0811449	0.102	0.037	1	ENSMUSG00000029171
Siva1	0.00154972	0.0832023	0.169	0.082	1	ENSMUSG00000064326
Srp9	0.00155118	0.0625103	0.42	0.257	1	ENSMUSG00000026511
Pnisr	0.00156093	0.0948874	0.466	0.294	1	ENSMUSG00000028248
Gtf3c6	0.00156618	0.0645209	0.221	0.119	1	ENSMUSG00000019837
Selenop	0.00157643	-0.0875305	0.914	0.892	1	ENSMUSG00000064373
Golga5	0.00157785	0.0715846	0.163	0.074	1	ENSMUSG00000021192
Carnmt1	0.0015851	0.0854576	0.244	0.141	1	ENSMUSG00000024726
Gm6136	0.00158884	-0.164748	0.299	0.398	1	ENSMUSG00000084106
Galnt10	0.00159664	0.0870026	0.146	0.067	1	ENSMUSG00000020520
Pde3a	0.00159791	0.0742357	0.092	0.03	1	ENSMUSG00000041741
Unc50	0.00159919	0.0917231	0.395	0.242	1	ENSMUSG00000026111
Txndc15	0.00159985	0.085653	0.307	0.178	1	ENSMUSG00000021497
Denr	0.00161592	0.0723998	0.363	0.216	1	ENSMUSG00000023106
Aplp2	0.00162442	-0.0691771	0.894	0.822	1	ENSMUSG00000031996
Gns	0.00163855	0.0780011	0.388	0.227	1	ENSMUSG00000034707
Psmc2	0.00164008	0.0888284	0.359	0.219	1	ENSMUSG00000028932
Cdc16	0.00165948	0.0737279	0.29	0.167	1	ENSMUSG00000038416
Pin1	0.00166447	0.0757455	0.148	0.067	1	ENSMUSG00000032171
Rpl13a	0.00166645	-0.132667	0.871	0.822	1	ENSMUSG00000074129
Gtf2ird1	0.00167135	0.0437021	0.284	0.156	1	ENSMUSG00000023079
Tmem38b	0.00167151	0.0716269	0.132	0.056	1	ENSMUSG00000028420
Ammecr1l	0.00168257	0.0662098	0.134	0.056	1	ENSMUSG00000041915
Mill2	0.00168473	0.080071	0.175	0.086	1	ENSMUSG00000040987
Ccdc59	0.00171593	0.0885706	0.376	0.23	1	ENSMUSG00000019897
Stub1	0.00173436	0.0930035	0.232	0.13	1	ENSMUSG00000039615
Rpl9-ps7	0.00173476	-0.0945385	0.111	0.186	1	ENSMUSG00000047965
Gga2	0.00175052	0.0587749	0.171	0.082	1	ENSMUSG00000030872
Gpi1	0.00175937	0.0917376	0.261	0.149	1	ENSMUSG00000036427
Svep1	0.00175973	0.0958354	0.309	0.182	1	ENSMUSG00000028369
Ednra	0.00178208	0.0865108	0.228	0.123	1	ENSMUSG00000031616
Gata2	0.00179742	-0.0662016	0.006	0.037	1	ENSMUSG00000015053
Trappc2l	0.00180104	0.0727739	0.311	0.178	1	ENSMUSG00000015013
Ccdc102a	0.00180641	0.0495338	0.044	0.004	1	ENSMUSG00000063605
Tmem19	0.00184354	0.0719174	0.171	0.082	1	ENSMUSG00000069520
Rps15	0.00186631	-0.141822	0.718	0.669	1	ENSMUSG00000063457
Mindy2	0.00186708	-0.206467	0.42	0.461	1	ENSMUSG00000042444
Tmem62	0.00188094	0.0464218	0.123	0.048	1	ENSMUSG00000054484
Bpnt1	0.00189005	0.0600878	0.084	0.026	1	ENSMUSG00000026617
Ehmt2	0.00189411	0.0875543	0.228	0.126	1	ENSMUSG00000013787
Ubxn4	0.00192586	-0.179675	0.514	0.532	1	ENSMUSG00000026353
Sipa1l1	0.00192826	0.0409462	0.044	0.004	1	ENSMUSG00000042700
Rab21	0.00194862	0.0808834	0.219	0.119	1	ENSMUSG00000020132
Git1	0.00195288	0.0708295	0.242	0.134	1	ENSMUSG00000011877
Col16a1	0.0019639	0.0778999	0.305	0.178	1	ENSMUSG00000040690
Gm14044	0.00196659	-0.121322	0.215	0.305	1	ENSMUSG00000083483
Ak5	0.00199152	0.0722513	0.106	0.041	1	ENSMUSG00000039058
Igfbp4	0.00199177	-0.0703187	0.985	0.941	1	ENSMUSG00000017493
Ctns	0.00199996	0.0737586	0.119	0.048	1	ENSMUSG00000005949
Spp1	0.00201432	-0.114138	0.985	0.937	1	ENSMUSG00000029304
Stk25	0.0020156	0.0666451	0.34	0.201	1	ENSMUSG00000026277
Rps9	0.00202045	-0.0862959	0.948	0.918	1	ENSMUSG00000006333
Pex16	0.00203755	0.0684374	0.071	0.019	1	ENSMUSG00000027222
Smpd4	0.00204389	0.0489407	0.058	0.011	1	ENSMUSG00000005899
Pet100	0.00205051	0.0715137	0.196	0.1	1	ENSMUSG00000087687
D830050J10Rik	0.00208828	0.0655682	0.071	0.019	1	ENSMUSG00000107994
Ms4a4d	0.00209193	0.104535	0.38	0.242	1	ENSMUSG00000024678
Yif1a	0.00210215	0.0741714	0.24	0.134	1	ENSMUSG00000024875
Smpd1	0.00212264	0.0680973	0.246	0.138	1	ENSMUSG00000037049
Slc37a4	0.00214705	0.0565231	0.065	0.015	1	ENSMUSG00000032114
Lmbr1l	0.00215037	0.0656623	0.05	0.007	1	ENSMUSG00000022999
Atp6v0e	0.00215313	0.108521	0.572	0.375	1	ENSMUSG00000015575
Nek6	0.00216776	0.0747235	0.163	0.078	1	ENSMUSG00000026749
Irak2	0.00217079	0.0708467	0.119	0.048	1	ENSMUSG00000060477
Flywch1	0.00219213	0.0706083	0.157	0.074	1	ENSMUSG00000040097
Pdgfa	0.00220022	0.14878	0.674	0.491	1	ENSMUSG00000025856
4930523C07Rik	0.00221071	0.0743423	0.173	0.086	1	ENSMUSG00000090394
Nfatc4	0.00221919	0.0508151	0.177	0.086	1	ENSMUSG00000023411
Actr2	0.00223616	0.110973	0.524	0.353	1	ENSMUSG00000020152
Kctd12b	0.00225544	0.05529	0.142	0.063	1	ENSMUSG00000041633
Numbl	0.00226745	0.0647662	0.186	0.093	1	ENSMUSG00000063160
Col6a1	0.00231878	0.159431	0.933	0.747	1	ENSMUSG00000001119
Gamt	0.00232045	0.0612324	0.257	0.141	1	ENSMUSG00000020150
Gm15710	0.00233098	-0.0696022	0.027	0.074	1	ENSMUSG00000084111
Prorsd1	0.00234927	0.0673036	0.18	0.089	1	ENSMUSG00000032673
Cbx1	0.00235575	0.107299	0.532	0.357	1	ENSMUSG00000018666
Mrpl13	0.00236226	0.0578725	0.219	0.119	1	ENSMUSG00000022370
Eif3d	0.00236254	0.0541984	0.169	0.082	1	ENSMUSG00000016554
Pdcd10	0.00236303	0.0704142	0.203	0.108	1	ENSMUSG00000027835
Rps14	0.00237549	-0.0848997	0.914	0.866	1	ENSMUSG00000024608
Kat2a	0.00238137	0.0496556	0.071	0.019	1	ENSMUSG00000020918
Hist1h2an	0.00238308	-0.00996006	0.01	0.045	1	ENSMUSG00000069309
Cfb	0.00238757	0.0748025	0.127	0.056	1	ENSMUSG00000090231
P2rx4	0.00238994	0.0725936	0.177	0.089	1	ENSMUSG00000029470
Serp1	0.00242739	0.0943277	0.505	0.323	1	ENSMUSG00000027808
Pbx1	0.00245299	0.107109	0.324	0.204	1	ENSMUSG00000052534
Lhfpl2	0.00247159	0.106345	0.221	0.126	1	ENSMUSG00000045312
Pex5	0.00247749	0.08053	0.242	0.138	1	ENSMUSG00000005069
Necap2	0.0024922	0.0756037	0.384	0.238	1	ENSMUSG00000028923
Gm5093	0.00250464	-0.0242126	0.01	0.045	1	ENSMUSG00000091742
Mdk	0.00251858	-0.158059	0.61	0.625	1	ENSMUSG00000027239
Rpl35a-ps2	0.0025273	-0.107706	0.132	0.212	1	ENSMUSG00000081214
Sat1	0.00254302	0.0985358	0.539	0.353	1	ENSMUSG00000025283
Synj2bp	0.00254479	0.0778589	0.209	0.112	1	ENSMUSG00000090935
Clcn6	0.00255749	0.0502159	0.056	0.011	1	ENSMUSG00000029016
Canx	0.00256634	-0.0691595	0.854	0.792	1	ENSMUSG00000020368
Mocs3	0.00259786	0.0467063	0.042	0.004	1	ENSMUSG00000074576
Csad	0.00259805	0.0758025	0.269	0.156	1	ENSMUSG00000023044
Cdk6	0.00260806	0.0686438	0.234	0.13	1	ENSMUSG00000040274
Ppic	0.00261374	-0.074448	0.939	0.855	1	ENSMUSG00000024538
Fam49a	0.00261903	0.0428294	0.042	0.004	1	ENSMUSG00000020589
Etv6	0.00262198	0.0582753	0.106	0.041	1	ENSMUSG00000030199
Uba52	0.00262896	-0.117405	0.914	0.9	1	ENSMUSG00000090137
Smim3	0.0026488	0.0774323	0.207	0.112	1	ENSMUSG00000038059
Arrb1	0.00265065	0.0580791	0.157	0.074	1	ENSMUSG00000018909
Senp3	0.00267846	0.0599162	0.198	0.104	1	ENSMUSG00000005204
Hist1h2ag	0.00268349	-0.012263	0.015	0.052	1	ENSMUSG00000069301
Bag3	0.00270906	0.0592322	0.276	0.156	1	ENSMUSG00000030847
Ngrn	0.00272228	0.0537199	0.129	0.056	1	ENSMUSG00000047084
Igfbp7	0.00273842	-0.0495251	0.96	0.9	1	ENSMUSG00000036256
Ints2	0.00274176	0.067804	0.088	0.03	1	ENSMUSG00000018068
Atp6v0d1	0.00276098	0.0648271	0.232	0.126	1	ENSMUSG00000013160
Gm42688	0.00276891	0.0519405	0.152	0.074	1	ENSMUSG00000079511
Col5a2	0.00277054	-0.0912555	0.902	0.833	1	ENSMUSG00000026042
Smt3h2-ps4	0.00278432	-0.0114976	0	0.019	1	ENSMUSG00000081201
Gm42671	0.00278432	-0.0217958	0	0.019	1	ENSMUSG00000105460
Tcf23	0.00278432	-0.0379565	0	0.019	1	ENSMUSG00000006642
Gm5869	0.00278432	-0.0297021	0	0.019	1	ENSMUSG00000104802
Gm42879	0.00278432	-0.0275254	0	0.019	1	ENSMUSG00000106590
Tpst2	0.00279541	0.0816569	0.37	0.23	1	ENSMUSG00000029344
Slc30a1	0.00280947	0.0723844	0.075	0.022	1	ENSMUSG00000037434
Lcp2	0.00286879	0.066886	0.092	0.033	1	ENSMUSG00000002699
Gdpd2	0.00286976	-0.102124	0.841	0.781	1	ENSMUSG00000019359
Rps16-ps2	0.00287232	-0.177101	0.505	0.565	1	ENSMUSG00000060419
Zfp862-ps	0.00288163	0.0750499	0.207	0.112	1	ENSMUSG00000107476
Tmem132a	0.00288861	0.0624617	0.111	0.045	1	ENSMUSG00000024736
Dnajc15	0.00289362	0.065473	0.165	0.082	1	ENSMUSG00000022013
Prpf8	0.00289824	0.098061	0.497	0.32	1	ENSMUSG00000020850
Slc48a1	0.0029041	0.0510055	0.259	0.145	1	ENSMUSG00000081534
Islr	0.00293504	-0.0528283	0.958	0.885	1	ENSMUSG00000037206
Ccdc3	0.00293821	-0.190397	0.434	0.476	1	ENSMUSG00000026676
Ptpn9	0.0029559	0.0673021	0.386	0.238	1	ENSMUSG00000032290
Ppfia1	0.0029648	0.0585555	0.154	0.074	1	ENSMUSG00000037519
Tubb2a	0.00300125	0.0865805	0.29	0.178	1	ENSMUSG00000058672
4930526A20Rik	0.00301092	0.0347959	0.127	0.056	1	ENSMUSG00000085521
Dus3l	0.00301966	0.0473335	0.063	0.015	1	ENSMUSG00000007603
Cyp39a1	0.00304191	0.058594	0.111	0.045	1	ENSMUSG00000023963
Rft1	0.00305828	0.0544729	0.171	0.086	1	ENSMUSG00000052395
Pabpc1	0.00307313	-0.0770036	0.942	0.918	1	ENSMUSG00000022283
Snapc5	0.00309849	0.076665	0.18	0.093	1	ENSMUSG00000032398
2610203C20Rik	0.00310604	0.0845336	0.079	0.026	1	ENSMUSG00000074415
Dot1l	0.0031112	0.0779711	0.125	0.056	1	ENSMUSG00000061589
Pls3	0.00311718	0.0991513	0.647	0.431	1	ENSMUSG00000016382
Ugt1a10	0.00311984	0.0145518	0.115	0.048	1	ENSMUSG00000090165
Ugt1a9	0.00311984	0.0145518	0.115	0.048	1	ENSMUSG00000090175
Ugt1a8	0.00311984	0.0145518	0.115	0.048	1	ENSMUSG00000089675
Ugt1a6b	0.00311984	0.0145518	0.115	0.048	1	ENSMUSG00000090145
Ugt1a5	0.00311984	0.0145518	0.115	0.048	1	ENSMUSG00000089943
Ugt1a2	0.00311984	0.0145518	0.115	0.048	1	ENSMUSG00000090171
Ugt1a1	0.00311984	0.0145518	0.115	0.048	1	ENSMUSG00000089960
Gna12	0.00312092	0.0637477	0.273	0.156	1	ENSMUSG00000000149
Epdr1	0.0031224	0.134247	0.762	0.565	1	ENSMUSG00000002808
Chst2	0.00312448	0.108109	0.61	0.413	1	ENSMUSG00000033350
Net1	0.00317577	0.09434	0.399	0.26	1	ENSMUSG00000021215
Rpl21-ps8	0.00318032	-0.0704621	0.05	0.108	1	ENSMUSG00000061684
Rps4x	0.00318945	-0.0811391	0.935	0.874	1	ENSMUSG00000031320
Nckap1	0.0032054	0.0976897	0.491	0.327	1	ENSMUSG00000027002
Lias	0.00321152	0.0825564	0.253	0.149	1	ENSMUSG00000029199
Dnttip1	0.00323433	0.0469479	0.075	0.022	1	ENSMUSG00000017299
Mad2l2	0.00324326	0.0700627	0.146	0.071	1	ENSMUSG00000029003
Rwdd1	0.00328263	0.0831975	0.409	0.275	1	ENSMUSG00000019782
Rps11	0.0032903	-0.0837469	0.858	0.781	1	ENSMUSG00000003429
Stat2	0.00329577	0.0789651	0.194	0.104	1	ENSMUSG00000040033
Ip6k2	0.00332067	0.0800382	0.246	0.145	1	ENSMUSG00000032599
Acsl1	0.00332793	0.0537451	0.075	0.022	1	ENSMUSG00000018796
Samd1	0.00334649	0.0821419	0.253	0.149	1	ENSMUSG00000079003
Oxa1l	0.00334953	0.0735668	0.223	0.126	1	ENSMUSG00000000959
Kpna6	0.00335158	0.0545712	0.177	0.089	1	ENSMUSG00000003731
Phb2	0.00338499	0.0679065	0.296	0.178	1	ENSMUSG00000004264
Zfp53	0.00338601	0.0549073	0.104	0.041	1	ENSMUSG00000057409
Lpcat1	0.0034043	0.069385	0.215	0.119	1	ENSMUSG00000021608
Wbscr22	0.00341876	0.0695723	0.177	0.093	1	ENSMUSG00000005378
Stard7	0.00342087	0.0650223	0.221	0.123	1	ENSMUSG00000027367
Nfib	0.00344931	-0.149016	0.633	0.643	1	ENSMUSG00000008575
Dse	0.00345024	0.110245	0.61	0.409	1	ENSMUSG00000039497
C1qtnf6	0.00346316	0.0828051	0.503	0.32	1	ENSMUSG00000022440
Gstt1	0.00347938	0.0733797	0.136	0.063	1	ENSMUSG00000001663
Dtx4	0.00350549	0.0688869	0.19	0.1	1	ENSMUSG00000039982
Gm21988	0.00352595	-0.137386	0.727	0.669	1	ENSMUSG00000040904
Tbcel	0.00353788	0.0692296	0.223	0.123	1	ENSMUSG00000037287
Hexa	0.00355703	0.093988	0.449	0.297	1	ENSMUSG00000025232
Rpl10	0.00356122	-0.102597	0.95	0.941	1	ENSMUSG00000008682
Casp1	0.00356214	0.0708116	0.213	0.119	1	ENSMUSG00000025888
Ube2k	0.00359152	0.0842362	0.338	0.208	1	ENSMUSG00000029203
Nacc2	0.00359518	0.0843362	0.269	0.164	1	ENSMUSG00000026932
Cnn2	0.00360977	-0.0418225	0.95	0.885	1	ENSMUSG00000004665
Vasp	0.00361229	0.0915619	0.438	0.283	1	ENSMUSG00000030403
Tbc1d2b	0.0036137	0.0683153	0.263	0.156	1	ENSMUSG00000037410
Zcrb1	0.00361595	0.0860681	0.374	0.238	1	ENSMUSG00000022635
52219	0.00364108	-0.160024	0.23	0.309	1	NA
Trappc1	0.00365597	0.0607281	0.37	0.227	1	ENSMUSG00000049299
Rplp1	0.00366721	-0.0746331	0.948	0.888	1	ENSMUSG00000007892
Ndufb9	0.00368029	0.0680024	0.359	0.223	1	ENSMUSG00000022354
Tef	0.0036899	0.0579232	0.225	0.126	1	ENSMUSG00000022389
2010111I01Rik	0.00369546	0.0373887	0.18	0.093	1	ENSMUSG00000021458
Agbl3	0.00375805	0.0630094	0.061	0.015	1	ENSMUSG00000038836
Tmem140	0.00376055	0.0746023	0.188	0.1	1	ENSMUSG00000057137
Tnfaip2	0.00376719	0.0805143	0.415	0.26	1	ENSMUSG00000021281
Gm28530	0.00378663	-0.0587124	0.061	0.119	1	ENSMUSG00000101452
Plekhf1	0.00378847	0.0585313	0.173	0.089	1	ENSMUSG00000074170
Apex1	0.00379913	0.0747554	0.14	0.067	1	ENSMUSG00000035960
Abcd2	0.00380698	0.0575677	0.079	0.026	1	ENSMUSG00000055782
Ccm2	0.00381585	0.0619397	0.119	0.052	1	ENSMUSG00000000378
Hk1	0.0038334	0.0533639	0.165	0.082	1	ENSMUSG00000037012
Gm2810	0.00383962	0.0273632	0.073	0.022	1	ENSMUSG00000082938
Galk2	0.0038584	0.0558714	0.129	0.059	1	ENSMUSG00000027207
Tstd2	0.00386473	0.0803601	0.132	0.063	1	ENSMUSG00000035495
Prickle2	0.00387252	0.0586751	0.073	0.022	1	ENSMUSG00000030020
Adap2	0.00387328	0.0658224	0.096	0.037	1	ENSMUSG00000020709
Sdhc	0.00388035	0.0791281	0.319	0.197	1	ENSMUSG00000058076
Arhgap5	0.00388117	-0.190405	0.374	0.42	1	ENSMUSG00000035133
Chpf2	0.00390094	0.0387779	0.119	0.052	1	ENSMUSG00000038181
Eva1b	0.00391026	0.0858325	0.282	0.175	1	ENSMUSG00000050212
Stoml2	0.00392502	0.0694905	0.138	0.067	1	ENSMUSG00000028455
Samm50	0.00393145	0.0643164	0.161	0.082	1	ENSMUSG00000022437
Sema7a	0.00394295	-0.165882	0.664	0.625	1	ENSMUSG00000038264
Ppp3r1	0.00396956	0.0680243	0.403	0.253	1	ENSMUSG00000033953
Brd7	0.00400503	0.0720331	0.175	0.093	1	ENSMUSG00000031660
Hmox2	0.00400745	0.0687983	0.284	0.167	1	ENSMUSG00000004070
Ermp1	0.00404246	0.0771268	0.294	0.175	1	ENSMUSG00000046324
Paip2b	0.00404786	0.0642155	0.084	0.03	1	ENSMUSG00000045896
Gpr176	0.00405639	0.0841628	0.175	0.093	1	ENSMUSG00000040133
Apcdd1	0.00406939	0.0762209	0.186	0.1	1	ENSMUSG00000071847
C1qtnf1	0.00408705	0.0664537	0.15	0.074	1	ENSMUSG00000017446
Wdtc1	0.00409355	0.0515975	0.163	0.082	1	ENSMUSG00000037622
Bsg	0.00409916	-0.0837562	0.785	0.699	1	ENSMUSG00000023175
Hsd17b7	0.0041397	0.0718377	0.194	0.108	1	ENSMUSG00000026675
Ppm1l	0.00414158	0.0680533	0.09	0.033	1	ENSMUSG00000027784
Prkab1	0.00415478	0.0592348	0.123	0.056	1	ENSMUSG00000029513
Pdlim7	0.00415604	0.0673397	0.169	0.089	1	ENSMUSG00000021493
Tusc3	0.00416453	0.0683767	0.244	0.141	1	ENSMUSG00000039530
Mis12	0.00418323	0.0574887	0.136	0.063	1	ENSMUSG00000040599
Chd9	0.00419059	-0.181353	0.186	0.257	1	ENSMUSG00000056608
Ccser2	0.00419873	0.0750012	0.436	0.283	1	ENSMUSG00000058690
Slc23a2	0.00421075	0.0509071	0.148	0.071	1	ENSMUSG00000027340
1700123O20Rik	0.00422806	0.0609872	0.144	0.071	1	ENSMUSG00000040822
Pcdhb22	0.00423675	0.0606626	0.09	0.033	1	ENSMUSG00000073591
Dgat1	0.0042557	0.0655788	0.1	0.041	1	ENSMUSG00000022555
Ptdss1	0.00425803	0.0659395	0.322	0.193	1	ENSMUSG00000021518
Sstr2	0.00426684	0.0914872	0.127	0.059	1	ENSMUSG00000047904
B630019K06Rik	0.00432391	0.0400427	0.046	0.007	1	ENSMUSG00000052364
Bax	0.00434053	0.0777263	0.363	0.234	1	ENSMUSG00000003873
Arfgap1	0.0043462	0.0670279	0.161	0.082	1	ENSMUSG00000027575
Gm20547	0.00436707	0.0489379	0.071	0.022	1	ENSMUSG00000092511
Tiam2	0.00439556	0.0428682	0.067	0.019	1	ENSMUSG00000023800
Tmem128	0.00441177	0.0583841	0.154	0.078	1	ENSMUSG00000067365
Hspg2	0.00442185	0.085284	0.347	0.223	1	ENSMUSG00000028763
Slc26a11	0.00443078	0.0627268	0.077	0.026	1	ENSMUSG00000039908
Pisd	0.00443802	0.0791615	0.18	0.097	1	ENSMUSG00000023452
Dgcr8	0.00444143	0.0625877	0.1	0.041	1	ENSMUSG00000022718
Rbm4b	0.00445413	0.0415727	0.102	0.041	1	ENSMUSG00000033760
Hoxa7	0.00446804	0.0771143	0.207	0.115	1	ENSMUSG00000038236
Itgb1	0.00447581	-0.0603078	0.983	0.933	1	ENSMUSG00000025809
Jup	0.00448393	0.0681349	0.186	0.1	1	ENSMUSG00000001552
Zfp607a	0.00449998	0.030213	0.046	0.007	1	ENSMUSG00000020420
Crnkl1	0.00450875	-0.138955	0.094	0.156	1	ENSMUSG00000001767
Hira	0.00451272	0.0790118	0.088	0.033	1	ENSMUSG00000022702
Rpsa-ps1	0.00451707	-0.0286515	0.025	0.067	1	ENSMUSG00000102117
Gm5850	0.00452826	-0.0465452	0.054	0.108	1	ENSMUSG00000103286
Gm5851	0.00452826	-0.0465452	0.054	0.108	1	ENSMUSG00000104028
Siae	0.00453466	0.0680178	0.106	0.045	1	ENSMUSG00000001942
Mterf3	0.00454778	0.0670531	0.104	0.045	1	ENSMUSG00000021519
Myo1c	0.00455724	0.067487	0.276	0.164	1	ENSMUSG00000017774
Dhcr7	0.0045583	0.0760583	0.104	0.045	1	ENSMUSG00000058454
Rcn3	0.00456452	-0.108226	0.833	0.777	1	ENSMUSG00000019539
Notch2	0.00459705	0.0915829	0.405	0.26	1	ENSMUSG00000027878
Eloc	0.0046442	0.0807579	0.317	0.197	1	ENSMUSG00000079658
Hnrnpdl	0.00464447	0.0809086	0.376	0.245	1	ENSMUSG00000029328
Man1b1	0.00464922	0.058372	0.14	0.067	1	ENSMUSG00000036646
Mrpl53	0.00466944	0.0488942	0.152	0.078	1	ENSMUSG00000030037
Synpo2	0.00468739	0.0358973	0.029	0	1	ENSMUSG00000050315
Adra1b	0.00468739	0.0381353	0.029	0	1	ENSMUSG00000050541
Hoxd8	0.00470671	0.0503289	0.052	0.011	1	ENSMUSG00000027102
Cxcl12	0.00476532	-0.103958	0.967	0.937	1	ENSMUSG00000061353
Rps13-ps5	0.00477308	-0.0320686	0.025	0.067	1	ENSMUSG00000082626
Eif3b	0.00478323	0.0588359	0.376	0.234	1	ENSMUSG00000056076
Cuedc2	0.00484014	0.05088	0.213	0.119	1	ENSMUSG00000036748
Mmp23	0.00486835	0.0739119	0.255	0.152	1	ENSMUSG00000029061
Fam96a	0.00487597	0.0597693	0.18	0.097	1	ENSMUSG00000032381
Clptm1l	0.0048869	0.0676773	0.376	0.238	1	ENSMUSG00000021610
Lrp10	0.0049096	0.0573301	0.2	0.112	1	ENSMUSG00000022175
Nsf	0.00491428	0.0606411	0.248	0.149	1	ENSMUSG00000034187
Rtn4	0.0049271	0.0967843	0.555	0.39	1	ENSMUSG00000020458
Gm14303	0.0049321	-0.0984448	0.067	0.126	1	ENSMUSG00000081344
Trove2	0.00494029	0.0910797	0.34	0.219	1	ENSMUSG00000018199
Glrx5	0.00495046	0.0633083	0.311	0.193	1	ENSMUSG00000021102
P4htm	0.004953	0.03368	0.038	0.004	1	ENSMUSG00000006675
Plbd2	0.00496526	0.0790461	0.349	0.219	1	ENSMUSG00000029598
Surf4	0.00496815	0.095221	0.591	0.398	1	ENSMUSG00000014867
Clec14a	0.00500849	0.0925704	0.259	0.156	1	ENSMUSG00000045930
Cdyl2	0.00500893	0.0519411	0.058	0.015	1	ENSMUSG00000031758
Pde7b	0.00501	-0.075539	0.021	0.059	1	ENSMUSG00000019990
Efnb1	0.00501142	0.0831456	0.474	0.32	1	ENSMUSG00000031217
Rpl37a	0.00502296	-0.0967844	0.916	0.862	1	ENSMUSG00000046330
Eprs	0.00502418	0.0775861	0.522	0.349	1	ENSMUSG00000026615
Mocs1	0.00507202	0.0741013	0.238	0.145	1	ENSMUSG00000064120
Frmd8	0.00507502	0.0603723	0.127	0.059	1	ENSMUSG00000024816
Plb1	0.00507578	0.0531704	0.084	0.03	1	ENSMUSG00000029134
Sucla2	0.00507592	0.0591165	0.248	0.145	1	ENSMUSG00000022110
Asl	0.00508202	0.0445702	0.052	0.011	1	ENSMUSG00000025533
Srprb	0.00510583	0.0691774	0.142	0.071	1	ENSMUSG00000032553
Ttll5	0.0051096	0.0459214	0.065	0.019	1	ENSMUSG00000012609
Gbp7	0.00512992	0.0719513	0.324	0.201	1	ENSMUSG00000040253
Tango2	0.00516129	0.0555596	0.161	0.082	1	ENSMUSG00000013539
Pak4	0.00516665	0.0519221	0.077	0.026	1	ENSMUSG00000030602
Spr	0.00517381	0.0497572	0.165	0.086	1	ENSMUSG00000033735
Ntn1	0.00521593	0.0450865	0.065	0.019	1	ENSMUSG00000020902
Pik3r2	0.0052239	0.0743272	0.2	0.112	1	ENSMUSG00000031834
4933439C10Rik	0.00523129	0.0548062	0.065	0.019	1	ENSMUSG00000072893
Il17ra	0.00523456	0.0439444	0.106	0.045	1	ENSMUSG00000002897
Prkcd	0.00523507	0.0627237	0.273	0.164	1	ENSMUSG00000021948
Gtpbp8	0.0052362	0.0457532	0.077	0.026	1	ENSMUSG00000022668
Arl5b	0.00526441	0.0600449	0.15	0.074	1	ENSMUSG00000017418
Tmem106a	0.00527408	0.0559716	0.117	0.052	1	ENSMUSG00000034947
Pfn2	0.00528546	0.0421545	0.117	0.052	1	ENSMUSG00000027805
Cln5	0.00530876	0.0891764	0.303	0.19	1	ENSMUSG00000022125
2310061I04Rik	0.00533991	0.0418013	0.065	0.019	1	ENSMUSG00000050705
Pyroxd2	0.00533991	0.0421802	0.065	0.019	1	ENSMUSG00000060224
Ifitm1	0.0053563	-0.0758686	0.019	0.056	1	ENSMUSG00000025491
Id3	0.0053592	-0.0710711	0.937	0.892	1	ENSMUSG00000007872
Mgp	0.00538095	0.128154	0.434	0.309	1	ENSMUSG00000030218
Ctif	0.00539748	0.065477	0.159	0.082	1	ENSMUSG00000052928
Crbn	0.00546402	0.0467141	0.106	0.045	1	ENSMUSG00000005362
Hist1h2aj	0.00548846	-0.00945479	0.013	0.045	1	ENSMUSG00000080076
Tcf7l2	0.00549648	-0.174755	0.403	0.446	1	ENSMUSG00000024985
Map4k2	0.00551471	0.0439357	0.065	0.019	1	ENSMUSG00000024948
Lrrc40	0.00553071	0.0433958	0.071	0.022	1	ENSMUSG00000063052
Gm45396	0.00553086	0.0464138	0.065	0.019	1	ENSMUSG00000110332
Zfand3	0.0055523	0.0671231	0.315	0.197	1	ENSMUSG00000044477
Cdc14b	0.00556604	0.0677328	0.063	0.019	1	ENSMUSG00000033102
AC153856.2	0.00558751	-0.0196193	0.015	0.048	1	ENSMUSG00000112135
AC153856.6	0.00558751	-0.0196193	0.015	0.048	1	ENSMUSG00000112614
Mrps23	0.00559175	0.046512	0.127	0.059	1	ENSMUSG00000023723
Ppp1r10	0.00561034	0.0621456	0.19	0.104	1	ENSMUSG00000039220
Kctd11	0.00562821	0.0635147	0.121	0.056	1	ENSMUSG00000046731
Rnh1	0.00562971	0.0824404	0.194	0.112	1	ENSMUSG00000038650
Hist1h2ai	0.00565282	-0.0104302	0.015	0.048	1	ENSMUSG00000071516
Hist1h2ah	0.00565282	-0.0104302	0.015	0.048	1	ENSMUSG00000069302
Hist1h2ad	0.00565282	-0.0104302	0.015	0.048	1	ENSMUSG00000071478
Plekhh3	0.00565641	0.0634199	0.098	0.041	1	ENSMUSG00000035172
Tcf4	0.0056888	-0.129284	0.676	0.639	1	ENSMUSG00000053477
Baz1b	0.00569001	0.0478875	0.441	0.275	1	ENSMUSG00000002748
Mief2	0.00575226	0.0530259	0.081	0.03	1	ENSMUSG00000018599
Slco2a1	0.00575535	0.0421343	0.044	0.007	1	ENSMUSG00000032548
Esrra	0.00576285	0.0605939	0.098	0.041	1	ENSMUSG00000024955
Xlr	0.005818	0.0485161	0.044	0.007	1	ENSMUSG00000054626
Vmp1	0.00582425	0.0676566	0.436	0.286	1	ENSMUSG00000018171
Ehd2	0.00584757	0.0564337	0.163	0.086	1	ENSMUSG00000074364
Cdk9	0.00584788	0.0528942	0.209	0.119	1	ENSMUSG00000009555
Dbn1	0.00585834	0.0729483	0.267	0.164	1	ENSMUSG00000034675
Gpsm3	0.00588643	0.0621694	0.142	0.071	1	ENSMUSG00000034786
Parp10	0.00589478	0.038965	0.071	0.022	1	ENSMUSG00000063268
Gm5620	0.00594673	-0.0246627	0.01	0.041	1	ENSMUSG00000056904
Dpysl2	0.00596515	0.0771631	0.428	0.279	1	ENSMUSG00000022048
Ugt1a7c	0.00598412	0.00611179	0.115	0.052	1	ENSMUSG00000090124
Ugt1a6a	0.00598412	0.00611179	0.115	0.052	1	ENSMUSG00000054545
Hmg20b	0.00599118	0.0629006	0.217	0.126	1	ENSMUSG00000020232
Txn2	0.00602343	0.0711034	0.39	0.249	1	ENSMUSG00000005354
Gm5453	0.00607567	-0.0201118	0.01	0.041	1	ENSMUSG00000062461
Vmac	0.00608909	0.0415163	0.075	0.026	1	ENSMUSG00000054723
Grb14	0.00609243	0.0588098	0.305	0.186	1	ENSMUSG00000026888
Derl2	0.00613366	0.0662726	0.259	0.156	1	ENSMUSG00000018442
Stk40	0.00614526	0.0481567	0.121	0.056	1	ENSMUSG00000042608
Gm4705	0.00616352	-0.0541574	0.042	0.089	1	ENSMUSG00000093686
Snx1	0.00618905	0.0893878	0.384	0.253	1	ENSMUSG00000032382
Purb	0.00618993	-0.11644	0.706	0.643	1	ENSMUSG00000094483
Rps6kb2	0.00619013	0.0725241	0.113	0.052	1	ENSMUSG00000024830
2310033P09Rik	0.00621316	0.0766388	0.138	0.071	1	ENSMUSG00000020441
Gm8667	0.00622372	0.0511712	0.079	0.03	1	ENSMUSG00000109712
Fbln1	0.00622694	0.0897637	0.311	0.201	1	ENSMUSG00000006369
Tacc1	0.00624835	0.10457	0.559	0.387	1	ENSMUSG00000065954
Socs5	0.00625541	0.0473898	0.257	0.149	1	ENSMUSG00000037104
Abca2	0.00627198	0.0620742	0.069	0.022	1	ENSMUSG00000026944
Vash2	0.00629825	0.0514241	0.063	0.019	1	ENSMUSG00000037568
Cemip	0.00630711	0.0866867	0.092	0.037	1	ENSMUSG00000052353
53817	0.00632049	-0.0116226	0.015	0.048	1	NA
Ap1ar	0.00632454	0.0569413	0.161	0.086	1	ENSMUSG00000074238
Tnip1	0.00632689	0.056348	0.121	0.056	1	ENSMUSG00000020400
Rps16	0.00632858	-0.0986527	0.927	0.881	1	ENSMUSG00000037563
Ecm1	0.00633405	0.109898	0.514	0.361	1	ENSMUSG00000028108
Cyp51	0.00634589	0.0538159	0.127	0.059	1	ENSMUSG00000001467
Hip1	0.00636685	0.0770871	0.374	0.242	1	ENSMUSG00000039959
Tmem161b	0.00637032	0.0536092	0.075	0.026	1	ENSMUSG00000035762
Npnt	0.00639301	0.0850266	0.184	0.104	1	ENSMUSG00000040998
Ccdc9	0.00642012	0.0724592	0.113	0.052	1	ENSMUSG00000041375
Ldhb	0.00645724	0.0524123	0.169	0.089	1	ENSMUSG00000030246
Cd244	0.00646887	0.0318029	0.027	0	1	ENSMUSG00000004709
Grk5	0.00646887	0.0346772	0.027	0	1	ENSMUSG00000003228
Zc2hc1a	0.00648995	0.0535358	0.092	0.037	1	ENSMUSG00000043542
Tle2	0.00649337	0.0715943	0.123	0.059	1	ENSMUSG00000034771
Ccnyl1	0.00650863	0.0656637	0.15	0.078	1	ENSMUSG00000070871
Ezr	0.0065189	0.0563111	0.142	0.071	1	ENSMUSG00000052397
Rtel1	0.00651992	0.0449789	0.035	0.004	1	ENSMUSG00000038685
Ube2d-ps	0.00652088	0.0522482	0.092	0.037	1	ENSMUSG00000083844
Med26	0.00654616	0.0415219	0.035	0.004	1	ENSMUSG00000045248
Mgat3	0.00655653	0.0568618	0.069	0.022	1	ENSMUSG00000042428
Rpl28	0.00656694	-0.129656	0.868	0.81	1	ENSMUSG00000030432
5430419D17Rik	0.00658655	0.0401867	0.05	0.011	1	ENSMUSG00000006204
Gm12166	0.0065927	0.0363678	0.136	0.067	1	ENSMUSG00000069899
Glrx	0.00659362	0.0614444	0.336	0.212	1	ENSMUSG00000021591
Gm37396	0.00663011	0.0221462	0.05	0.011	1	ENSMUSG00000104205
U2af1l4	0.00663644	0.0391042	0.171	0.093	1	ENSMUSG00000078765
Pmp22	0.00663939	-0.17366	0.278	0.331	1	ENSMUSG00000018217
Mrps15	0.00664406	0.0507316	0.188	0.104	1	ENSMUSG00000028861
Tab1	0.00665711	0.0553102	0.063	0.019	1	ENSMUSG00000022414
Ndufb7	0.00666924	0.0470597	0.336	0.204	1	ENSMUSG00000033938
Gps2	0.00667805	0.0695181	0.246	0.145	1	ENSMUSG00000023170
Klf2	0.00669272	-0.197676	0.146	0.208	1	ENSMUSG00000055148
Cln6	0.00671182	0.0500667	0.152	0.078	1	ENSMUSG00000032245
Lpar1	0.0067128	0.0722704	0.424	0.271	1	ENSMUSG00000038668
Kcnk6	0.00672165	0.052055	0.069	0.022	1	ENSMUSG00000046410
Vdac3	0.00673198	0.0665388	0.372	0.242	1	ENSMUSG00000008892
Ccl27a	0.00673253	0.0268905	0.035	0.004	1	ENSMUSG00000073888
Nudt3	0.00679788	0.0351264	0.273	0.167	1	ENSMUSG00000024213
Acp2	0.00682117	0.0721527	0.357	0.234	1	ENSMUSG00000002103
Acy3	0.00682143	0.0373652	0.092	0.037	1	ENSMUSG00000024866
Tead1	0.00683682	0.0972191	0.443	0.309	1	ENSMUSG00000055320
Cyr61	0.00685591	0.118901	0.426	0.301	1	ENSMUSG00000028195
Cdk8	0.00685749	0.0743626	0.136	0.071	1	ENSMUSG00000029635
Isy1	0.00686854	0.0580162	0.15	0.078	1	ENSMUSG00000030056
Ccdc22	0.00687436	0.0219353	0.05	0.011	1	ENSMUSG00000031143
Strn4	0.0068874	0.0675216	0.309	0.197	1	ENSMUSG00000030374
Noc3l	0.00693016	0.0446716	0.115	0.052	1	ENSMUSG00000024999
Ammecr1	0.00695218	0.0744268	0.294	0.186	1	ENSMUSG00000042225
Pfas	0.00695862	0.0382904	0.056	0.015	1	ENSMUSG00000020899
Ywhab	0.00697397	-0.0328213	0.933	0.848	1	ENSMUSG00000018326
Ankrd13b	0.0070176	0.0484731	0.092	0.037	1	ENSMUSG00000037907
St3gal2	0.00702789	0.061896	0.261	0.16	1	ENSMUSG00000031749
Klhl33	0.00705866	0.0483486	0.098	0.041	1	ENSMUSG00000090799
Nedd8	0.00708991	0.114371	0.626	0.431	1	ENSMUSG00000010376
Wdr26	0.00710527	0.0833581	0.493	0.338	1	ENSMUSG00000038733
Ehd3	0.00713826	0.0731072	0.37	0.245	1	ENSMUSG00000024065
Zfp626	0.00713939	0.0620094	0.086	0.033	1	ENSMUSG00000030604
Bop1	0.00714531	0.0337873	0.152	0.078	1	ENSMUSG00000022557
Gpx8	0.00715413	-0.129074	0.674	0.628	1	ENSMUSG00000021760
Srrm2	0.00717733	-0.144806	0.566	0.565	1	ENSMUSG00000039218
Chmp4b	0.00719876	-0.135295	0.67	0.613	1	ENSMUSG00000038467
Psen2	0.00720002	0.0413777	0.186	0.1	1	ENSMUSG00000010609
Ndufc1	0.0072095	0.0583896	0.447	0.294	1	ENSMUSG00000037152
Rasa4	0.00721186	0.0615931	0.073	0.026	1	ENSMUSG00000004952
Ptk7	0.00721327	0.0604256	0.223	0.13	1	ENSMUSG00000023972
Fam160b2	0.00728211	0.0515403	0.102	0.045	1	ENSMUSG00000022095
Pcdh19	0.00729103	0.0547898	0.079	0.03	1	ENSMUSG00000051323
Dhrs7b	0.0072959	0.0693148	0.159	0.086	1	ENSMUSG00000042569
Mrps36	0.00731214	0.0392996	0.19	0.108	1	ENSMUSG00000061474
Gm11808	0.00732446	-0.101014	0.908	0.877	1	ENSMUSG00000068240
Aldh3a1	0.00732673	0.0357176	0.18	0.097	1	ENSMUSG00000019102
Atl3	0.00733131	0.089098	0.472	0.331	1	ENSMUSG00000024759
Fam171a2	0.00734282	0.0307708	0.075	0.026	1	ENSMUSG00000034685
Rhoj	0.00736248	0.0541407	0.288	0.178	1	ENSMUSG00000046768
Minpp1	0.00740727	0.0553829	0.23	0.134	1	ENSMUSG00000024896
Clec11a	0.00749418	-0.0743953	0.906	0.836	1	ENSMUSG00000004473
Gm13430	0.00752207	-0.0107787	0	0.015	1	ENSMUSG00000083101
Prg2	0.00752207	-0.0234763	0	0.015	1	ENSMUSG00000027073
D330050G23Rik	0.00752207	-0.0252358	0	0.015	1	ENSMUSG00000085316
Gm7931	0.00752207	-0.00959026	0	0.015	1	ENSMUSG00000067321
D7Ertd443e	0.00752207	-0.0275942	0	0.015	1	ENSMUSG00000030994
Gm45250	0.00752207	-0.0275273	0	0.015	1	ENSMUSG00000110317
Pcbd1	0.00752207	-0.0273907	0	0.015	1	ENSMUSG00000020098
51924	0.00752207	-0.0104271	0	0.015	1	NA
Fam84b	0.00752207	-0.0261411	0	0.015	1	ENSMUSG00000072568
Ccdc80	0.00756619	-0.0796702	0.808	0.736	1	ENSMUSG00000022665
Hacd1	0.0075923	0.080345	0.447	0.309	1	ENSMUSG00000063275
Ddt	0.00759414	0.0553576	0.169	0.093	1	ENSMUSG00000001666
Pde2a	0.00760104	0.0453053	0.067	0.022	1	ENSMUSG00000110195
Zbtb8os	0.00763594	0.0615079	0.144	0.074	1	ENSMUSG00000057572
Rnf103	0.00767777	0.0548152	0.129	0.063	1	ENSMUSG00000052656
Gpx1	0.00768311	0.0931374	0.434	0.305	1	ENSMUSG00000063856
Elovl1	0.00768472	0.0337366	0.234	0.134	1	ENSMUSG00000006390
Hddc3	0.0076909	0.0127098	0.063	0.019	1	ENSMUSG00000030532
Socs3	0.00769303	0.0764917	0.301	0.193	1	ENSMUSG00000053113
Zmym4	0.0076945	0.0752236	0.182	0.104	1	ENSMUSG00000042446
Fbxo8	0.0076955	0.0618641	0.127	0.063	1	ENSMUSG00000038206
Lig3	0.00770753	0.0451302	0.079	0.03	1	ENSMUSG00000020697
Tial1	0.00771831	0.0451109	0.296	0.182	1	ENSMUSG00000030846
Tbc1d19	0.00773847	0.0492517	0.119	0.056	1	ENSMUSG00000039178
Rpl30-ps1	0.00778375	-0.0741047	0.058	0.108	1	ENSMUSG00000057696
Kxd1	0.0077944	-0.099666	0.908	0.881	1	ENSMUSG00000055553
Mmp17	0.00781927	0.0566792	0.096	0.041	1	ENSMUSG00000029436
Zfp995	0.00782523	0.0426778	0.042	0.007	1	ENSMUSG00000078546
Kdm3b	0.00782531	-0.0881058	0.038	0.082	1	ENSMUSG00000038773
Shisa5	0.00785237	0.0534886	0.395	0.257	1	ENSMUSG00000025647
Dcxr	0.0078642	0.0482877	0.079	0.03	1	ENSMUSG00000039450
Ssrp1	0.00786601	0.0764267	0.447	0.294	1	ENSMUSG00000027067
Rps27a	0.00788068	-0.113084	0.906	0.874	1	ENSMUSG00000020460
Degs1	0.00789828	0.0471401	0.276	0.167	1	ENSMUSG00000038633
Gm5879	0.00791103	-0.0533412	0.075	0.13	1	ENSMUSG00000068262
Hmgcs1	0.00794539	0.054603	0.255	0.156	1	ENSMUSG00000093930
Hyou1	0.00794561	0.0560274	0.248	0.149	1	ENSMUSG00000032115
Fbxo22	0.00795994	0.0623292	0.138	0.071	1	ENSMUSG00000032309
Mc5r	0.00796388	0.0581828	0.048	0.011	1	ENSMUSG00000007480
Cyhr1	0.00799415	0.0740908	0.296	0.19	1	ENSMUSG00000053929
Prkar1a	0.0079979	-0.0809415	0.793	0.717	1	ENSMUSG00000020612
Praf2	0.00804431	0.06923	0.361	0.238	1	ENSMUSG00000031149
Prdx6	0.00804564	0.054642	0.332	0.208	1	ENSMUSG00000026701
Lmod1	0.00805202	0.0349157	0.042	0.007	1	ENSMUSG00000048096
Crat	0.00808151	0.0637911	0.138	0.071	1	ENSMUSG00000026853
Asrgl1	0.00808427	0.0508311	0.079	0.03	1	ENSMUSG00000024654
Edc4	0.00810211	0.049566	0.15	0.078	1	ENSMUSG00000036270
Sema6a	0.00810962	0.0368655	0.042	0.007	1	ENSMUSG00000019647
Maob	0.00815429	0.057916	0.173	0.097	1	ENSMUSG00000040147
Sc5d	0.00820475	0.05349	0.138	0.071	1	ENSMUSG00000032018
Fscn1	0.00821278	0.082245	0.497	0.342	1	ENSMUSG00000029581
AC161250.2	0.00825861	-0.0428493	0.063	0.115	1	ENSMUSG00000111824
Actr1b	0.00828123	0.0611882	0.359	0.238	1	ENSMUSG00000037351
Zfp974	0.00828467	0.0242517	0.042	0.007	1	ENSMUSG00000070709
Ncln	0.00829292	0.0408859	0.123	0.059	1	ENSMUSG00000020238
Abhd16a	0.00832203	0.063279	0.349	0.219	1	ENSMUSG00000007036
Slc7a6	0.00833062	0.0351425	0.079	0.03	1	ENSMUSG00000031904
Pcx	0.00836604	0.0422207	0.048	0.011	1	ENSMUSG00000024892
Rpl13	0.00836628	-0.0612863	0.979	0.955	1	ENSMUSG00000000740
Gm4070	0.00841567	0.0166726	0.282	0.171	1	ENSMUSG00000078606
Rps27	0.0084327	-0.0944779	0.944	0.896	1	ENSMUSG00000090733
Grpel1	0.00844645	0.0371512	0.154	0.082	1	ENSMUSG00000029198
Hdac4	0.00845725	0.0439893	0.182	0.1	1	ENSMUSG00000026313
Faf2	0.00845741	0.0410901	0.223	0.13	1	ENSMUSG00000025873
Gm14005	0.00846035	0.0632577	0.115	0.056	1	ENSMUSG00000074813
Camk2g	0.00849126	0.0532973	0.165	0.089	1	ENSMUSG00000021820
Rnf149	0.00849597	0.0513244	0.388	0.257	1	ENSMUSG00000048234
Sdha	0.00850247	0.0615879	0.432	0.279	1	ENSMUSG00000021577
Col25a1	0.00850789	-0.135147	0.088	0.145	1	ENSMUSG00000058897
Nop9	0.00851161	0.0504481	0.09	0.037	1	ENSMUSG00000019297
Mrpl41	0.00851286	0.0595796	0.223	0.134	1	ENSMUSG00000036850
Rtcb	0.00853498	0.0521413	0.225	0.134	1	ENSMUSG00000001783
Timm50	0.00853705	0.0413878	0.113	0.052	1	ENSMUSG00000003438
Panx1	0.00854577	0.0664466	0.136	0.071	1	ENSMUSG00000031934
Gm10080	0.00855402	-0.0421356	0.027	0.067	1	ENSMUSG00000060467
Ptms	0.00855673	-0.0620132	0.962	0.933	1	ENSMUSG00000030122
52319	0.00858916	0.0460771	0.054	0.015	1	NA
Irak1bp1	0.00860924	0.0353687	0.102	0.045	1	ENSMUSG00000032251
Irs1	0.00865956	0.0958716	0.516	0.364	1	ENSMUSG00000055980
Gvin1	0.00866323	0.0124279	0.282	0.171	1	ENSMUSG00000045868
Hspb6	0.0086724	0.0334647	0.048	0.011	1	ENSMUSG00000036854
Sfr1	0.00871072	-0.119372	0.67	0.599	1	ENSMUSG00000025066
Litaf	0.00871459	0.0759731	0.413	0.279	1	ENSMUSG00000022500
Mro	0.0087169	0.0434512	0.067	0.022	1	ENSMUSG00000064036
Sdc1	0.00871918	0.0753091	0.378	0.257	1	ENSMUSG00000020592
Psma1	0.00880365	0.0705843	0.221	0.134	1	ENSMUSG00000030751
Gpm6b	0.0088346	0.0546414	0.248	0.149	1	ENSMUSG00000031342
Serf2	0.0088446	-0.0726737	0.929	0.855	1	ENSMUSG00000074884
Runx2	0.00889065	-0.0857673	0.779	0.71	1	ENSMUSG00000039153
Mef2c	0.00889451	-0.204241	0.472	0.472	1	ENSMUSG00000005583
Fibp	0.0089021	0.0592799	0.225	0.134	1	ENSMUSG00000024911
Gm17383	0.0089031	-0.0417972	0.025	0.063	1	ENSMUSG00000058625
Bad	0.00890611	0.041054	0.24	0.145	1	ENSMUSG00000024959
Ptpru	0.00893922	0.0328507	0.025	0	1	ENSMUSG00000028909
Syngap1	0.00893922	0.0289696	0.025	0	1	ENSMUSG00000067629
Gm26965	0.00897502	0.0220867	0.033	0.004	1	ENSMUSG00000097565
Dnaja1	0.00897715	-0.151542	0.662	0.651	1	ENSMUSG00000028410
Cmip	0.00898725	0.0473071	0.061	0.019	1	ENSMUSG00000034390
Mettl7a2	0.00899016	0.0252201	0.054	0.015	1	ENSMUSG00000056487
Tsr1	0.0090143	-0.0815225	0.046	0.093	1	ENSMUSG00000038335
Map2k1	0.00902012	0.0469127	0.363	0.23	1	ENSMUSG00000004936
Tln1	0.00904195	-0.065498	0.856	0.781	1	ENSMUSG00000028465
Fdx1	0.00904217	0.070421	0.2	0.119	1	ENSMUSG00000032051
Sh3bp5	0.00904685	0.0594573	0.342	0.216	1	ENSMUSG00000021892
Akip1	0.00905406	0.0551957	0.152	0.082	1	ENSMUSG00000031023
Dtx3l	0.00908288	0.0438118	0.213	0.123	1	ENSMUSG00000049502
Clptm1	0.00908776	0.0680082	0.344	0.223	1	ENSMUSG00000002981
Enah	0.00911422	-0.084355	0.783	0.706	1	ENSMUSG00000022995
Uck1	0.00911651	0.0361736	0.061	0.019	1	ENSMUSG00000002550
Scarf2	0.00914753	0.0826319	0.434	0.294	1	ENSMUSG00000012017
Ralb	0.00915195	0.0500691	0.336	0.216	1	ENSMUSG00000004451
Colgalt1	0.00918795	0.0813866	0.453	0.309	1	ENSMUSG00000034807
Mrps2	0.00923854	0.058826	0.121	0.059	1	ENSMUSG00000035772
Cog4	0.0092431	0.0371109	0.136	0.067	1	ENSMUSG00000031753
Ltbr	0.00925017	0.0720641	0.493	0.335	1	ENSMUSG00000030339
Hist2h2aa2	0.00927293	0.0248177	0.163	0.089	1	ENSMUSG00000063954
Sec24c	0.00927705	0.032281	0.234	0.138	1	ENSMUSG00000039367
Tor2a	0.00928345	0.0461269	0.205	0.119	1	ENSMUSG00000009563
Rassf2	0.00930308	0.0327849	0.033	0.004	1	ENSMUSG00000027339
S100a1	0.0093081	-0.175709	0.459	0.472	1	ENSMUSG00000044080
Firre	0.0093229	0.0413106	0.054	0.015	1	ENSMUSG00000085396
53885	0.00936857	0.0552251	0.338	0.219	1	NA
Tmem37	0.00937941	0.0393501	0.054	0.015	1	ENSMUSG00000050777
Pfkp	0.00938003	0.0425604	0.061	0.019	1	ENSMUSG00000021196
Poglut1	0.0094173	0.0421929	0.194	0.112	1	ENSMUSG00000034064
Mcoln1	0.00942353	0.0582262	0.125	0.063	1	ENSMUSG00000004567
Ccdc85b	0.00943623	0.0291963	0.054	0.015	1	ENSMUSG00000095098
Chst11	0.00946611	-0.182056	0.175	0.234	1	ENSMUSG00000034612
Tmem176b	0.00948498	-0.050487	0.985	0.959	1	ENSMUSG00000029810
Pigs	0.00949032	0.0449125	0.248	0.152	1	ENSMUSG00000041958
Sel1l	0.00955284	0.074657	0.484	0.327	1	ENSMUSG00000020964
Pacs2	0.00956474	0.0681674	0.161	0.089	1	ENSMUSG00000021143
Tsga10	0.00956851	0.0465186	0.061	0.019	1	ENSMUSG00000060771
Cd44	0.00957151	0.0738924	0.313	0.208	1	ENSMUSG00000005087
H3f3b	0.00965502	-0.0445815	0.948	0.877	1	ENSMUSG00000016559
Mrpl34	0.00967979	0.060727	0.115	0.056	1	ENSMUSG00000034880
Mrpl16	0.00968468	0.0469605	0.106	0.048	1	ENSMUSG00000024683
Qsox1	0.0097016	0.109107	0.693	0.532	1	ENSMUSG00000033684
Tmem29	0.00971159	0.0451235	0.138	0.071	1	ENSMUSG00000041353
Kdelc2	0.0097206	0.0737934	0.326	0.212	1	ENSMUSG00000034487
Ssh3	0.00972094	0.0697906	0.205	0.123	1	ENSMUSG00000034616
B4galnt1	0.009747	0.0509151	0.251	0.156	1	ENSMUSG00000006731
Fbxo3	0.00974757	0.0577428	0.167	0.093	1	ENSMUSG00000027180
Psmb3	0.0097709	0.0549198	0.255	0.16	1	ENSMUSG00000069744
Gli3	0.00981191	0.0540144	0.19	0.108	1	ENSMUSG00000021318
Wdr70	0.00990028	0.0294019	0.096	0.041	1	ENSMUSG00000039828
Mtch2	0.00990693	0.0452088	0.34	0.219	1	ENSMUSG00000027282
Evc2	0.00992477	0.0399556	0.161	0.086	1	ENSMUSG00000050248
Lrp12	0.0099253	0.0353146	0.084	0.033	1	ENSMUSG00000022305
Adat3.1	0.00995647	0.0359975	0.251	0.156	1	NA
Ccdc134	0.00995847	0.0558105	0.071	0.026	1	ENSMUSG00000068114
Ncor1	0.00998216	0.0922185	0.587	0.409	1	ENSMUSG00000018501
Qpct	0.0100004	0.0603273	0.163	0.089	1	ENSMUSG00000024084
Gm42878	0.0100175	0.0227573	0.163	0.089	1	ENSMUSG00000105340
Taf1b	0.0100206	0.060144	0.129	0.067	1	ENSMUSG00000059669
Mrps18a	0.0100396	0.0606214	0.129	0.067	1	ENSMUSG00000023967
Fbrsl1	0.0100466	0.0609431	0.188	0.108	1	ENSMUSG00000043323
Comt	0.0100522	0.113535	0.718	0.532	1	ENSMUSG00000000326
Elk3	0.0100579	0.0392048	0.305	0.193	1	ENSMUSG00000008398
Eif4g2	0.0100646	-0.0531328	0.896	0.803	1	ENSMUSG00000005610
Zhx2	0.0100679	0.0415396	0.084	0.033	1	ENSMUSG00000071757
Slc52a2	0.0101109	0.0556027	0.077	0.03	1	ENSMUSG00000022560
Snx4	0.0101136	0.0612947	0.432	0.286	1	ENSMUSG00000022808
AC151846.1	0.0101238	-0.0669896	0.019	0.052	1	ENSMUSG00000111897
Diaph2	0.0101611	0.0640883	0.194	0.112	1	ENSMUSG00000034480
Slc22a5	0.0101831	0.0321174	0.125	0.063	1	ENSMUSG00000018900
Rmnd5a	0.0101925	0.0378427	0.328	0.208	1	ENSMUSG00000002222
Psmb5	0.0101985	0.050392	0.415	0.271	1	ENSMUSG00000022193
Klf11	0.0102124	0.0464619	0.084	0.033	1	ENSMUSG00000020653
Ylpm1	0.0102204	0.0337876	0.257	0.156	1	ENSMUSG00000021244
Ddit4	0.0102242	0.0598493	0.198	0.115	1	ENSMUSG00000020108
Vezt	0.0102746	0.080686	0.223	0.141	1	ENSMUSG00000036099
Slc26a2	0.0102958	0.0583183	0.332	0.212	1	ENSMUSG00000034320
Pin4	0.0103026	0.0326987	0.157	0.086	1	ENSMUSG00000079480
Sgta	0.0103339	0.0675304	0.188	0.112	1	ENSMUSG00000004937
Dab2ip	0.0103804	0.0699597	0.344	0.23	1	ENSMUSG00000026883
Eno1b	0.0104195	0.055476	0.401	0.271	1	ENSMUSG00000059040
Idh1	0.0104433	0.0787259	0.482	0.335	1	ENSMUSG00000025950
Ivns1abp	0.0104892	0.0407082	0.188	0.108	1	ENSMUSG00000023150
Fxyd5	0.0104899	-0.131443	0.15	0.216	1	ENSMUSG00000009687
Hdac1	0.0105111	0.0555482	0.438	0.301	1	ENSMUSG00000028800
Btf3l4	0.0105281	0.0317433	0.401	0.264	1	ENSMUSG00000028568
Cd300lg	0.0105438	0.0485428	0.077	0.03	1	ENSMUSG00000017309
Galnt11	0.0105936	0.047126	0.148	0.078	1	ENSMUSG00000038072
Tm2d3	0.010595	0.0518474	0.175	0.1	1	ENSMUSG00000078681
Csrp1	0.0106124	0.0645393	0.175	0.1	1	ENSMUSG00000026421
Pip4k2a	0.0106321	-0.174505	0.15	0.208	1	ENSMUSG00000026737
Vcan	0.0106412	0.066407	0.382	0.264	1	ENSMUSG00000021614
Mapkapk2	0.0106677	0.0721512	0.313	0.204	1	ENSMUSG00000016528
Hdac3	0.0106743	0.0454132	0.263	0.16	1	ENSMUSG00000024454
Ybx1	0.0106866	-0.0577347	0.879	0.796	1	ENSMUSG00000028639
Creb3	0.0107169	0.0508004	0.273	0.171	1	ENSMUSG00000028466
Stx8	0.010719	0.0306554	0.1	0.045	1	ENSMUSG00000020903
Klc1	0.0107372	0.0443485	0.284	0.178	1	ENSMUSG00000021288
9130208D14Rik	0.0107467	0.0189869	0.04	0.007	1	ENSMUSG00000086513
Gtf2h1	0.0107746	0.0468177	0.203	0.119	1	ENSMUSG00000006599
Chp1	0.0107763	0.0761994	0.418	0.271	1	ENSMUSG00000014077
Ldlr	0.0107886	0.0327488	0.127	0.063	1	ENSMUSG00000032193
Gatad1	0.0108018	0.0729011	0.472	0.331	1	ENSMUSG00000007415
Tubb6	0.0108687	0.0631992	0.148	0.082	1	ENSMUSG00000001473
Hunk	0.0108896	0.0560582	0.098	0.045	1	ENSMUSG00000053414
Fblim1	0.0108904	0.0529049	0.129	0.067	1	ENSMUSG00000006219
C1galt1c1	0.0108904	0.0517415	0.129	0.067	1	ENSMUSG00000048970
Adamtsl4	0.0109	0.0524316	0.115	0.056	1	ENSMUSG00000015850
B4galt1	0.0109074	0.0844241	0.428	0.294	1	ENSMUSG00000028413
Cdk4	0.0109235	0.07009	0.468	0.312	1	ENSMUSG00000006728
Fam122b	0.0109516	-0.118589	0.063	0.112	1	ENSMUSG00000036022
Nme7	0.0109904	0.0489014	0.052	0.015	1	ENSMUSG00000026575
Tmem43	0.0110301	0.0651963	0.223	0.138	1	ENSMUSG00000030095
Cgrrf1	0.01106	0.0470018	0.125	0.063	1	ENSMUSG00000055128
Vegfb	0.011107	0.0544655	0.177	0.1	1	ENSMUSG00000024962
Zkscan14	0.0111107	-0.0535583	0.008	0.033	1	ENSMUSG00000029627
Tti1	0.0111199	0.0543483	0.115	0.056	1	ENSMUSG00000027650
Slc35a2	0.0111672	0.0553805	0.171	0.097	1	ENSMUSG00000031156
Eci2	0.0111748	0.0687138	0.211	0.13	1	ENSMUSG00000021417
Diaph1	0.011193	0.0552322	0.165	0.093	1	ENSMUSG00000024456
Cwc25	0.0111991	0.0554199	0.154	0.086	1	ENSMUSG00000018541
Rps15a-ps4	0.01121	-0.0314892	0.008	0.033	1	ENSMUSG00000083757
Arhgap25	0.01121	-0.051659	0.008	0.033	1	ENSMUSG00000030047
Gm16061	0.011226	-0.0107101	0.021	0.056	1	ENSMUSG00000080972
Phc2	0.0112446	0.0473859	0.253	0.152	1	ENSMUSG00000028796
Dram1	0.0112471	0.0513579	0.203	0.119	1	ENSMUSG00000020057
Clip2	0.0112785	0.0677274	0.198	0.119	1	ENSMUSG00000063146
Lamtor2	0.0113534	0.0545562	0.217	0.13	1	ENSMUSG00000028062
Ndufv2	0.0113656	0.0790052	0.518	0.349	1	ENSMUSG00000024099
Pth1r	0.0114045	-0.131032	0.691	0.669	1	ENSMUSG00000032492
Prss23	0.0114265	0.0519523	0.186	0.108	1	ENSMUSG00000039405
Rtfdc1	0.0114581	0.0672761	0.152	0.086	1	ENSMUSG00000027502
4833422C13Rik	0.0114675	0.08693	0.223	0.141	1	ENSMUSG00000074782
Azi2	0.0115161	0.0470048	0.228	0.141	1	ENSMUSG00000039285
Smarcd1	0.0115376	0.062475	0.152	0.086	1	ENSMUSG00000023018
Fst	0.0115837	0.0832573	0.405	0.279	1	ENSMUSG00000021765
Ppia	0.0116057	-0.0348499	0.985	0.937	1	ENSMUSG00000071866
Casp7	0.0116317	0.0447501	0.046	0.011	1	ENSMUSG00000025076
Gm26782	0.0116399	0.0548956	0.182	0.108	1	ENSMUSG00000097431
AC158600.5	0.0116407	-0.0147433	0.013	0.041	1	ENSMUSG00000112814
AC158600.1	0.0116407	-0.0147433	0.013	0.041	1	ENSMUSG00000112027
AC158600.4	0.0116407	-0.0147433	0.013	0.041	1	ENSMUSG00000112781
AC158600.3	0.0116407	-0.0147433	0.013	0.041	1	ENSMUSG00000112495
Prmt1	0.0116759	0.0596613	0.351	0.234	1	ENSMUSG00000109324
Papola	0.0116925	-0.153318	0.591	0.558	1	ENSMUSG00000021111
Agpat1	0.0116933	0.052326	0.246	0.149	1	ENSMUSG00000034254
Kctd7	0.0117824	0.0387213	0.046	0.011	1	ENSMUSG00000034110
Gm17251	0.011788	0.04282	0.104	0.048	1	ENSMUSG00000090952
Dnajc30	0.0118393	0.0245522	0.127	0.063	1	ENSMUSG00000061118
Gnb2	0.011852	0.0832284	0.489	0.331	1	ENSMUSG00000029713
Nsun3	0.0118949	0.0460545	0.058	0.019	1	ENSMUSG00000050312
Crnde	0.011899	0.034707	0.065	0.022	1	ENSMUSG00000031736
Esd	0.0119046	0.061385	0.486	0.335	1	ENSMUSG00000021996
Sgf29	0.0119133	0.0569906	0.109	0.052	1	ENSMUSG00000030714
Pear1	0.0119137	0.0386385	0.071	0.026	1	ENSMUSG00000028073
Gm9830	0.011961	-0.0260379	0.013	0.041	1	ENSMUSG00000094437
Snf8	0.0120145	0.0312135	0.282	0.182	1	ENSMUSG00000006058
Kcnk2	0.0120933	0.119458	0.758	0.584	1	ENSMUSG00000037624
2009-09-01	0.0121087	0.0403791	0.246	0.152	1	ENSMUSG00000059248
Slc22a3	0.0121175	0.0446574	0.125	0.063	1	ENSMUSG00000023828
C1qtnf7	0.0121177	0.0355802	0.031	0.004	1	ENSMUSG00000061535
Zbtb8a	0.0121528	0.0391776	0.088	0.037	1	ENSMUSG00000028807
Ttc5	0.0121587	0.0451896	0.115	0.056	1	ENSMUSG00000006288
Scamp4	0.0121692	0.0300487	0.248	0.156	1	ENSMUSG00000113949
Pex11a	0.012172	0.0487463	0.069	0.026	1	ENSMUSG00000030545
Sav1	0.0122254	0.064632	0.443	0.294	1	ENSMUSG00000021067
Med11	0.0122873	0.0216134	0.104	0.048	1	ENSMUSG00000018923
Gm28037	0.0122962	-0.154419	0.447	0.494	1	ENSMUSG00000098371
Cep164	0.0123341	0.0295508	0.132	0.067	1	ENSMUSG00000043987
Dnajc11	0.0123364	0.0519801	0.117	0.059	1	ENSMUSG00000039768
Qpctl	0.0123595	0.0429552	0.098	0.045	1	ENSMUSG00000030407
Naa20	0.0123649	0.0565723	0.284	0.186	1	ENSMUSG00000002728
Zc3h4	0.0123684	0.0600709	0.19	0.112	1	ENSMUSG00000059273
Wdr63	0.0123732	0.0253055	0.023	0	1	ENSMUSG00000043020
Ramp1	0.0123885	-0.162025	0.084	0.134	1	ENSMUSG00000034353
Mtr	0.0124155	0.0255317	0.065	0.022	1	ENSMUSG00000021311
Atp5d	0.0124216	0.0491361	0.386	0.257	1	ENSMUSG00000003072
Qtrt2	0.0124271	0.0322256	0.052	0.015	1	ENSMUSG00000022704
Cnppd1	0.0124387	0.05968	0.159	0.089	1	ENSMUSG00000033159
Ccng2	0.0124669	0.0339545	0.213	0.126	1	ENSMUSG00000029385
Gm7290	0.0124828	-0.0508926	0.042	0.086	1	ENSMUSG00000078192
Malsu1	0.0124945	0.0317754	0.132	0.067	1	ENSMUSG00000029815
Rpl17-ps5	0.0125127	-0.0909231	0.238	0.316	1	ENSMUSG00000081855
Gm9354	0.0125136	-0.0471873	0.042	0.086	1	ENSMUSG00000109059
Snhg8	0.0125492	0.060069	0.244	0.152	1	ENSMUSG00000104960
Pskh1	0.0125506	0.0399563	0.081	0.033	1	ENSMUSG00000048310
Smarca1	0.0125555	0.0773406	0.384	0.268	1	ENSMUSG00000031099
Rhoc	0.0125717	0.0777489	0.643	0.461	1	ENSMUSG00000002233
Slc12a9	0.012592	0.0434894	0.075	0.03	1	ENSMUSG00000037344
Tmem87b	0.0126021	0.0555741	0.207	0.123	1	ENSMUSG00000014353
Gm8242	0.0126089	0.0249133	0.031	0.004	1	ENSMUSG00000102827
Ino80c	0.012651	0.0336685	0.058	0.019	1	ENSMUSG00000047989
Arhgap15	0.0126529	-0.101739	0.038	0.078	1	ENSMUSG00000049744
Ror2	0.0126884	0.0388921	0.052	0.015	1	ENSMUSG00000021464
Rab32	0.0127098	0.0434525	0.123	0.063	1	ENSMUSG00000019832
Tra2b	0.0127219	-0.17866	0.413	0.42	1	ENSMUSG00000022858
Jun	0.0127328	0.0673238	0.344	0.227	1	ENSMUSG00000052684
Sulf2	0.0127597	0.0313897	0.031	0.004	1	ENSMUSG00000006800
Rps7	0.0127679	-0.119351	0.902	0.844	1	ENSMUSG00000061477
Snx11	0.0127769	0.0750496	0.15	0.086	1	ENSMUSG00000020876
Tctn1	0.0127972	0.0573389	0.144	0.078	1	ENSMUSG00000038593
Zfp579	0.0128422	0.0538401	0.144	0.078	1	ENSMUSG00000051550
Ndufs6	0.0129084	0.0582723	0.296	0.197	1	ENSMUSG00000021606
Ppp1r14b	0.0129425	0.0579319	0.38	0.257	1	ENSMUSG00000056612
Ube2d3	0.01296	0.0536092	0.505	0.338	1	ENSMUSG00000078578
Polr2g	0.012976	0.0649246	0.34	0.23	1	ENSMUSG00000071662
Lrrc59	0.0129992	0.0428983	0.278	0.178	1	ENSMUSG00000020869
Mllt6	0.0130012	0.0581393	0.336	0.223	1	ENSMUSG00000038437
Cnbp	0.0130237	-0.0669771	0.852	0.777	1	ENSMUSG00000030057
Jam3	0.0130648	0.0479658	0.134	0.071	1	ENSMUSG00000031990
Msx1	0.0130958	0.0552876	0.177	0.104	1	ENSMUSG00000048450
Naglu	0.0130959	0.0460587	0.192	0.112	1	ENSMUSG00000001751
Ing1	0.0131135	0.0741696	0.292	0.193	1	ENSMUSG00000045969
Stk11ip	0.0131198	0.0341832	0.081	0.033	1	ENSMUSG00000026213
Kif3b	0.013169	0.0498573	0.165	0.093	1	ENSMUSG00000027475
Gm45837	0.0131694	0.03811	0.063	0.022	1	ENSMUSG00000030653
Agap1	0.0131892	0.0684676	0.238	0.152	1	ENSMUSG00000055013
Tceal9	0.0131936	0.0909884	0.572	0.416	1	ENSMUSG00000042712
Sharpin	0.0132467	0.0620196	0.163	0.093	1	ENSMUSG00000022552
Fosb	0.0132471	0.0501924	0.157	0.089	1	ENSMUSG00000003545
Rapgef3	0.013249	0.0535691	0.123	0.063	1	ENSMUSG00000022469
Diablo	0.0132808	0.0440372	0.223	0.138	1	ENSMUSG00000029433
Rasa3	0.0132845	0.0554768	0.426	0.286	1	ENSMUSG00000031453
Tmem9	0.013318	0.0476393	0.282	0.178	1	ENSMUSG00000026411
Mgrn1	0.0133802	0.0720356	0.418	0.294	1	ENSMUSG00000022517
Cnot3	0.0134052	0.0464038	0.263	0.167	1	ENSMUSG00000035632
St6galnac4	0.0134275	0.0490575	0.409	0.264	1	ENSMUSG00000079442
Cacnb3	0.0134919	0.0688544	0.265	0.175	1	ENSMUSG00000003352
Lypla2	0.0135196	0.046332	0.113	0.056	1	ENSMUSG00000028670
Slc25a51	0.01355	0.0415197	0.273	0.171	1	ENSMUSG00000045973
Ap1b1	0.0136535	0.0486247	0.086	0.037	1	ENSMUSG00000009090
Usp6nl	0.0136727	0.0327803	0.217	0.126	1	ENSMUSG00000039046
Etfrf1	0.0137052	0.0494757	0.123	0.063	1	ENSMUSG00000040370
AL607105.1	0.0137105	-0.113761	0.336	0.405	1	ENSMUSG00000113061
Bcl10	0.0137581	0.0403321	0.213	0.126	1	ENSMUSG00000028191
Ap1m1	0.0138085	0.0384159	0.123	0.063	1	ENSMUSG00000003033
Sfrp2	0.0138205	0.0537463	0.069	0.026	1	ENSMUSG00000027996
Tmem164	0.0138349	0.041329	0.154	0.086	1	ENSMUSG00000047045
Rpl36a-ps2	0.0138382	-0.125158	0.524	0.561	1	ENSMUSG00000105388
Fat4	0.0138448	0.0808734	0.192	0.119	1	ENSMUSG00000046743
Kremen1	0.0139134	0.053845	0.276	0.178	1	ENSMUSG00000020393
Psmd8	0.0139202	0.0514181	0.351	0.234	1	ENSMUSG00000030591
Plekhg5	0.0139301	0.056258	0.09	0.041	1	ENSMUSG00000039713
Slc22a17	0.0139471	0.0565965	0.196	0.119	1	ENSMUSG00000022199
Polr2k	0.0139649	0.0453764	0.292	0.193	1	ENSMUSG00000045996
Fstl3	0.0140271	0.0446442	0.086	0.037	1	ENSMUSG00000020325
Tufm	0.014031	0.0328758	0.069	0.026	1	ENSMUSG00000073838
Hs1bp3	0.014031	0.0404206	0.069	0.026	1	ENSMUSG00000020605
Osgep	0.0140575	0.0609652	0.142	0.078	1	ENSMUSG00000006289
Poldip2	0.0140605	0.0486358	0.127	0.067	1	ENSMUSG00000001100
Med30	0.0140855	0.0386388	0.14	0.074	1	ENSMUSG00000038622
Tgfbr2	0.0140858	0.0728375	0.472	0.327	1	ENSMUSG00000032440
Fgfbp3	0.0140901	0.0418463	0.038	0.007	1	ENSMUSG00000047632
Rai2	0.0141041	-0.0858479	0.046	0.089	1	ENSMUSG00000043518
Rbmx	0.0141086	0.0528769	0.192	0.115	1	ENSMUSG00000031134
Mum1	0.0141308	0.0432354	0.106	0.052	1	ENSMUSG00000020156
Aldh5a1	0.0141373	0.0401041	0.069	0.026	1	ENSMUSG00000035936
Strip1	0.0142145	0.0560802	0.132	0.071	1	ENSMUSG00000014601
Mfrp	0.0142357	0.0276941	0.177	0.1	1	ENSMUSG00000034739
C1qtnf5	0.0142357	0.0276941	0.177	0.1	1	ENSMUSG00000079592
Map3k2	0.0142516	0.074874	0.173	0.104	1	ENSMUSG00000024383
Camkk2	0.0142589	0.0406369	0.263	0.164	1	ENSMUSG00000029471
Naxe	0.0142612	0.0627742	0.255	0.164	1	ENSMUSG00000028070
Gm3608	0.0142859	0.0154968	0.38	0.249	1	ENSMUSG00000067017
H1f0	0.0143439	0.0996271	0.674	0.476	1	ENSMUSG00000096210
Slc25a1	0.014373	0.0526615	0.282	0.182	1	ENSMUSG00000003528
Ccdc84	0.0143887	0.0644707	0.05	0.015	1	ENSMUSG00000043923
Fam210a	0.0144002	0.0523944	0.127	0.067	1	ENSMUSG00000038121
Tgfbrap1	0.0144113	0.037242	0.092	0.041	1	ENSMUSG00000070939
Fam69b	0.0144192	0.0570571	0.1	0.048	1	ENSMUSG00000036186
Sfxn2	0.0144639	0.0417639	0.198	0.119	1	ENSMUSG00000025036
Ptpn23	0.0145068	0.0409158	0.086	0.037	1	ENSMUSG00000036057
Tsen34	0.014511	0.0168559	0.324	0.204	1	ENSMUSG00000035585
Alg3	0.0145537	0.0213663	0.115	0.056	1	ENSMUSG00000033809
Erg28	0.0145681	0.0586008	0.284	0.182	1	ENSMUSG00000021252
Zfp46	0.0145985	0.0585471	0.1	0.048	1	ENSMUSG00000051351
Car8	0.014607	0.0708066	0.198	0.123	1	ENSMUSG00000041261
Sh3pxd2b	0.0146163	0.0430003	0.457	0.309	1	ENSMUSG00000040711
Cramp1l	0.0146202	0.0486144	0.106	0.052	1	ENSMUSG00000038002
Abtb1	0.0146515	0.0401998	0.056	0.019	1	ENSMUSG00000030083
Ddx19a	0.0147101	0.0493804	0.144	0.078	1	ENSMUSG00000015023
Cltc	0.0147742	-0.0707429	0.785	0.684	1	ENSMUSG00000047126
Dlx5	0.014823	-0.0979125	0.825	0.74	1	ENSMUSG00000029755
Vps4b	0.014864	0.0332076	0.286	0.186	1	ENSMUSG00000009907
Idh2	0.0148795	0.0390941	0.349	0.23	1	ENSMUSG00000030541
Nek4	0.0149366	0.0614773	0.09	0.041	1	ENSMUSG00000021918
Tbrg1	0.0149467	0.0701142	0.459	0.323	1	ENSMUSG00000011114
Ric8b	0.0149788	0.0621407	0.094	0.045	1	ENSMUSG00000035620
Gtf2f2	0.0150016	0.0521185	0.09	0.041	1	ENSMUSG00000067995
Nup88	0.0150121	0.0633324	0.159	0.093	1	ENSMUSG00000040667
Uap1	0.0150179	0.0344951	0.177	0.1	1	ENSMUSG00000026670
Bccip	0.0150189	0.0429692	0.169	0.097	1	ENSMUSG00000030983
Usp8	0.0150282	0.0398961	0.313	0.201	1	ENSMUSG00000027363
Pdcd7	0.015069	0.0312268	0.102	0.048	1	ENSMUSG00000041837
Gm14412	0.0150738	-0.0244135	0.002	0.019	1	ENSMUSG00000078868
Itga2b	0.0150738	-0.0288848	0.002	0.019	1	ENSMUSG00000034664
Marcksl1	0.0151021	0.0499236	0.428	0.279	1	ENSMUSG00000047945
Sh2d4a	0.0151105	0.0334188	0.038	0.007	1	ENSMUSG00000053886
C430049E01Rik	0.0151329	-0.0768309	0.025	0.059	1	ENSMUSG00000108900
Hoxa10	0.0151335	0.0389388	0.238	0.145	1	ENSMUSG00000000938
Tmem68	0.015148	0.0488335	0.121	0.063	1	ENSMUSG00000028232
Hdc	0.015169	-0.0293654	0.002	0.019	1	ENSMUSG00000027360
Fez1	0.015169	-0.0280238	0.002	0.019	1	ENSMUSG00000032118
Gm12242	0.015169	-0.0144956	0.002	0.019	1	ENSMUSG00000082476
Map1lc3a	0.0151873	0.0900949	0.603	0.442	1	ENSMUSG00000027602
Hist2h2aa1	0.0152229	0.0178007	0.163	0.093	1	ENSMUSG00000064220
Atp5l2-ps	0.0152238	0.0241185	0.115	0.059	1	ENSMUSG00000084168
Pim1	0.0152262	0.0523421	0.146	0.082	1	ENSMUSG00000024014
Dnajb14	0.0152305	0.0532642	0.451	0.32	1	ENSMUSG00000074212
Schip1	0.0152358	0.0260064	0.044	0.011	1	ENSMUSG00000027777
Mrvi1	0.0152647	-0.0151501	0.002	0.019	1	ENSMUSG00000005611
Kif15	0.0152647	-0.0341009	0.002	0.019	1	ENSMUSG00000036768
Dhrs7	0.0152682	0.0329774	0.315	0.201	1	ENSMUSG00000021094
Gtpbp1	0.0152784	0.0492267	0.184	0.108	1	ENSMUSG00000042535
Rsl24d1	0.0153364	0.0373276	0.186	0.108	1	ENSMUSG00000032215
Sppl3	0.0153589	0.064353	0.38	0.26	1	ENSMUSG00000029550
Lin37	0.0154024	0.0442869	0.056	0.019	1	ENSMUSG00000036845
Gm2308	0.0154577	-0.0103317	0.002	0.019	1	ENSMUSG00000092257
Lysmd1	0.01548	0.0371257	0.044	0.011	1	ENSMUSG00000053769
Snrpg	0.015482	-0.136291	0.585	0.595	1	ENSMUSG00000057278
53643	0.0154879	0.0381488	0.056	0.019	1	NA
Traf3	0.0155173	0.0660041	0.104	0.052	1	ENSMUSG00000021277
Card19	0.0155408	0.0414842	0.079	0.033	1	ENSMUSG00000037960
Gm10241	0.0155551	-0.00929395	0.002	0.019	1	ENSMUSG00000084838
Tpgs2	0.0155722	0.0518838	0.142	0.078	1	ENSMUSG00000024269
Ptprm	0.0155794	0.0305998	0.134	0.071	1	ENSMUSG00000033278
Rbm45	0.0155974	0.0464363	0.163	0.093	1	ENSMUSG00000042369
Chid1	0.0155977	0.0471077	0.09	0.041	1	ENSMUSG00000025512
Csnk2b	0.0156707	0.0677836	0.557	0.39	1	ENSMUSG00000024387
Tmem198b	0.0156841	0.0430293	0.1	0.048	1	ENSMUSG00000047090
Isca2	0.0157041	0.0523672	0.184	0.112	1	ENSMUSG00000021241
Lsm14b	0.0157047	0.0380992	0.169	0.097	1	ENSMUSG00000039108
Ssbp4	0.0157212	0.0546337	0.161	0.093	1	ENSMUSG00000070003
Zwint	0.0157238	0.0251617	0.269	0.167	1	ENSMUSG00000019923
Vps36	0.0157636	0.0324057	0.288	0.182	1	ENSMUSG00000031479
Asph	0.0158066	0.0846568	0.553	0.375	1	ENSMUSG00000028207
Slc35e2	0.0158392	0.0287681	0.063	0.022	1	ENSMUSG00000042202
Cap1	0.0158484	0.0727041	0.541	0.372	1	ENSMUSG00000028656
Adcy9	0.0158779	0.0307971	0.044	0.011	1	ENSMUSG00000005580
Rab31	0.0158897	0.056135	0.401	0.271	1	ENSMUSG00000056515
Slc43a2	0.0159222	0.0529889	0.18	0.108	1	ENSMUSG00000038178
Nop53	0.015932	0.0387287	0.265	0.171	1	ENSMUSG00000041560
S1pr3	0.0159324	0.0851707	0.641	0.457	1	ENSMUSG00000067586
Lins1	0.0159577	0.0411972	0.05	0.015	1	ENSMUSG00000053091
Pfdn1	0.0159616	0.0465492	0.374	0.245	1	ENSMUSG00000024346
Spg7	0.0160579	0.0349261	0.23	0.141	1	ENSMUSG00000000738
Lysmd2	0.0160833	0.0404127	0.169	0.097	1	ENSMUSG00000032184
Rpl23a	0.0160884	-0.0831146	0.958	0.903	1	ENSMUSG00000058546
Zfp869	0.0161097	0.0523506	0.084	0.037	1	ENSMUSG00000054648
Sap30l	0.0161807	0.0554276	0.215	0.134	1	ENSMUSG00000020519
Il17rc	0.0162298	0.0555716	0.14	0.078	1	ENSMUSG00000030281
Eif4e2	0.0162318	0.0540086	0.257	0.164	1	ENSMUSG00000026254
Adam1a	0.0162396	0.0184922	0.163	0.093	1	ENSMUSG00000072647
Rps3a3	0.0162413	0.0284886	0.05	0.015	1	ENSMUSG00000059751
Gm12696	0.0162712	-0.0548308	0.038	0.078	1	ENSMUSG00000084159
Gm8451	0.0163078	-0.142627	0.328	0.401	1	ENSMUSG00000099471
Cdk5rap3	0.0163424	0.0550869	0.104	0.052	1	ENSMUSG00000018669
Dleu2	0.0164035	-0.13863	0.154	0.212	1	ENSMUSG00000097589
Il7	0.0164115	0.0442822	0.248	0.152	1	ENSMUSG00000040329
Rnf213	0.0164657	0.0516482	0.173	0.1	1	ENSMUSG00000070327
Dpysl3	0.0164784	-0.0410461	0.965	0.922	1	ENSMUSG00000024501
1700052K11Rik	0.0164916	0.0270048	0.044	0.011	1	ENSMUSG00000099681
Vamp5	0.016495	0.0424792	0.111	0.056	1	ENSMUSG00000073002
Ckap4	0.0164988	-0.0411703	0.923	0.84	1	ENSMUSG00000046841
Pofut2	0.0165527	0.0378739	0.382	0.249	1	ENSMUSG00000020260
Ndufaf4	0.0166101	0.0489817	0.161	0.093	1	ENSMUSG00000028261
Ifi211	0.0166664	0.0549805	0.194	0.123	1	ENSMUSG00000026536
Cdk13	0.0167033	-0.147074	0.144	0.197	1	ENSMUSG00000041297
Meox1	0.016769	0.0282729	0.029	0.004	1	ENSMUSG00000001493
Rnf139	0.0167796	0.0522498	0.238	0.152	1	ENSMUSG00000037075
Creld2	0.0167867	0.0378587	0.251	0.16	1	ENSMUSG00000023272
Mafg	0.0167891	0.0569927	0.203	0.126	1	ENSMUSG00000051510
Nsun4	0.0168168	0.0427765	0.09	0.041	1	ENSMUSG00000028706
Nbeal1	0.0168174	-0.172454	0.161	0.216	1	ENSMUSG00000073664
Fzd5	0.0168692	-0.184236	0.424	0.428	1	ENSMUSG00000045005
Tctn3	0.0169022	0.036029	0.029	0.004	1	ENSMUSG00000025008
Actr10	0.0169146	0.0623535	0.365	0.245	1	ENSMUSG00000021076
F2r	0.0169691	0.0329433	0.029	0.004	1	ENSMUSG00000048376
Gm5075	0.0170072	-0.0231881	0.035	0.074	1	ENSMUSG00000105944
Asb7	0.0170332	0.0352993	0.079	0.033	1	ENSMUSG00000030509
Nek9	0.0170452	0.0562799	0.244	0.156	1	ENSMUSG00000034290
Mipep	0.0170599	0.0404303	0.213	0.13	1	ENSMUSG00000021993
Phf20l1	0.0170692	0.0303048	0.217	0.134	1	ENSMUSG00000072501
Hoxa11os	0.0171036	0.0335418	0.029	0.004	1	ENSMUSG00000086427
Cln3	0.0171039	0.0440041	0.067	0.026	1	ENSMUSG00000030720
AI314180	0.0171085	0.0367519	0.213	0.13	1	ENSMUSG00000050812
Gm13864	0.017161	-0.0358197	0.096	0.149	1	ENSMUSG00000082920
Nnat	0.0171614	0.0289883	0.021	0	1	ENSMUSG00000067786
C130013H08Rik	0.0171614	0.0264259	0.021	0	1	ENSMUSG00000105509
Rab42	0.0171614	0.0225513	0.021	0	1	ENSMUSG00000089687
Hspb1	0.0171614	0.0214434	0.021	0	1	ENSMUSG00000004951
Eps8l1	0.0171614	0.0271305	0.021	0	1	ENSMUSG00000006154
Zfp667	0.0171614	0.0248849	0.021	0	1	ENSMUSG00000054893
Prdm6	0.0171614	0.0241671	0.021	0	1	ENSMUSG00000069378
Carmn	0.0171614	0.0242637	0.021	0	1	ENSMUSG00000097324
Tmsb15b1	0.0171614	0.023116	0.021	0	1	ENSMUSG00000089768
Olfr289-ps1	0.0171614	0.0261532	0.021	0	1	ENSMUSG00000103538
Tmem159	0.0172059	0.0542281	0.125	0.067	1	ENSMUSG00000030917
2610044O15Rik8	0.0172218	0.046474	0.073	0.03	1	ENSMUSG00000071302
Gabarapl1	0.0172441	0.053465	0.211	0.13	1	ENSMUSG00000030161
Patz1	0.0172749	0.042927	0.111	0.056	1	ENSMUSG00000020453
Cyth2	0.0172994	0.0411949	0.125	0.067	1	ENSMUSG00000003269
2410018L13Rik	0.0173072	0.0182286	0.029	0.004	1	ENSMUSG00000073164
Slc3a2	0.0173689	0.0292235	0.382	0.253	1	ENSMUSG00000010095
Eng	0.0173725	0.041785	0.084	0.037	1	ENSMUSG00000026814
Rad54l2	0.0173858	0.0377355	0.079	0.033	1	ENSMUSG00000040661
Relb	0.017386	0.0303278	0.073	0.03	1	ENSMUSG00000002983
Cox5a	0.0173864	0.0545759	0.317	0.212	1	ENSMUSG00000000088
Cox7a2	0.0174283	0.0683537	0.378	0.26	1	ENSMUSG00000032330
Sp7	0.0174453	-0.121914	0.693	0.621	1	ENSMUSG00000060284
Mpp6	0.0174826	0.0436558	0.374	0.245	1	ENSMUSG00000038388
Tpm2	0.0174862	0.0805824	0.384	0.271	1	ENSMUSG00000028464
Keap1	0.0175019	0.0404821	0.209	0.126	1	ENSMUSG00000003308
Cdkn2a	0.0175129	0.0232072	0.029	0.004	1	ENSMUSG00000044303
Pafah1b3	0.0175129	0.0265302	0.029	0.004	1	ENSMUSG00000005447
Col18a1	0.0175204	0.0303837	0.138	0.074	1	ENSMUSG00000001435
Tmem181a	0.0175509	0.0482668	0.127	0.071	1	ENSMUSG00000038141
Klf12	0.0175845	-0.0794875	0.052	0.097	1	ENSMUSG00000072294
Bst2	0.0175875	0.0670127	0.38	0.257	1	ENSMUSG00000046718
1600014C10Rik	0.017597	0.0510367	0.19	0.115	1	ENSMUSG00000054676
Tmem185b	0.017614	0.0369441	0.125	0.067	1	ENSMUSG00000098923
Ndufaf7	0.0176265	0.0516661	0.061	0.022	1	ENSMUSG00000024082
Rps27l	0.0176667	0.063682	0.415	0.286	1	ENSMUSG00000036781
Dnajb12	0.0176995	0.0500714	0.207	0.126	1	ENSMUSG00000020109
Gp1bb	0.0177508	0.0156289	0.284	0.182	1	ENSMUSG00000050761
Mrps34	0.0177602	0.0524269	0.334	0.23	1	ENSMUSG00000038880
Picalm	0.0177931	-0.134795	0.599	0.543	1	ENSMUSG00000039361
Tmcc1	0.0178467	0.0331096	0.111	0.056	1	ENSMUSG00000030126
Tshz3	0.017851	0.0190444	0.117	0.059	1	ENSMUSG00000021217
Dnajb11	0.017905	0.0539735	0.388	0.264	1	ENSMUSG00000004460
Dnajc24	0.0179353	0.0418746	0.077	0.033	1	ENSMUSG00000027166
Sfxn3	0.0179391	0.0496793	0.18	0.108	1	ENSMUSG00000025212
Mapk3	0.0180176	0.0460028	0.319	0.216	1	ENSMUSG00000063065
Slc45a4	0.0180359	0.0425924	0.084	0.037	1	ENSMUSG00000079020
Cyc1	0.0180495	0.0457431	0.115	0.059	1	ENSMUSG00000022551
Igf1r	0.0180596	0.0470436	0.271	0.178	1	ENSMUSG00000005533
Sdc4	0.0180625	0.0456048	0.328	0.219	1	ENSMUSG00000017009
E2f5	0.0180826	0.0570693	0.088	0.041	1	ENSMUSG00000027552
Tmem184c	0.0181117	0.0557597	0.282	0.186	1	ENSMUSG00000031617
Cuedc1	0.0181431	0.0293236	0.24	0.152	1	ENSMUSG00000018378
Puf60	0.0181682	0.0765935	0.424	0.301	1	ENSMUSG00000002524
Dnajc10	0.0182003	0.074548	0.572	0.405	1	ENSMUSG00000027006
Mfn1	0.0182438	0.0281032	0.096	0.045	1	ENSMUSG00000027668
Ints7	0.0182464	0.0486408	0.129	0.071	1	ENSMUSG00000037461
Acaa1a	0.0182521	0.0283817	0.165	0.097	1	ENSMUSG00000036138
Gm12218	0.0182792	-0.0864728	0.18	0.245	1	ENSMUSG00000082380
Zfp462	0.0182807	0.0429761	0.061	0.022	1	ENSMUSG00000060206
Amd2	0.018383	0.0217745	0.175	0.104	1	ENSMUSG00000063953
Tm2d1	0.0183854	0.047931	0.284	0.19	1	ENSMUSG00000028563
Jdp2	0.0184366	0.048411	0.292	0.19	1	ENSMUSG00000034271
Ak1	0.0184859	0.0732994	0.441	0.305	1	ENSMUSG00000026817
Tfb2m	0.0184885	0.0453268	0.119	0.063	1	ENSMUSG00000026492
Git2	0.0185368	0.0548268	0.154	0.089	1	ENSMUSG00000041890
Ube3c	0.0185372	0.0466791	0.134	0.074	1	ENSMUSG00000039000
AC161250.1	0.0185508	0.0258209	0.102	0.052	1	ENSMUSG00000111472
Scamp1	0.0185622	0.0637715	0.232	0.149	1	ENSMUSG00000021687
Atp6v1a	0.018563	0.0558147	0.415	0.286	1	ENSMUSG00000052459
Usp49	0.0185676	0.0397062	0.061	0.022	1	ENSMUSG00000090115
Osbp	0.0186082	0.0478485	0.14	0.078	1	ENSMUSG00000024687
Eogt	0.0186633	0.0359918	0.154	0.086	1	ENSMUSG00000035245
Lrg1	0.0187286	-0.0597974	0.035	0.074	1	ENSMUSG00000037095
Syt6	0.0187362	0.0521189	0.359	0.238	1	ENSMUSG00000027849
Lgals3bp	0.0187656	0.103207	0.756	0.554	1	ENSMUSG00000033880
Pomk	0.0188079	0.0346069	0.1	0.048	1	ENSMUSG00000037251
Rps15a-ps5	0.0188343	-0.11202	0.175	0.238	1	ENSMUSG00000067058
Sirt2	0.0188396	0.0389092	0.33	0.216	1	ENSMUSG00000015149
Aebp2	0.0188595	0.0209876	0.28	0.178	1	ENSMUSG00000030232
Galnt1	0.0188801	0.0720328	0.564	0.401	1	ENSMUSG00000000420
Ggnbp2	0.0189052	0.0473869	0.482	0.335	1	ENSMUSG00000020530
Hmgb3	0.0189272	0.0336141	0.084	0.037	1	ENSMUSG00000015217
Mrps10	0.0189794	0.0399422	0.104	0.052	1	ENSMUSG00000034729
Impdh2	0.0190215	0.0411587	0.234	0.152	1	ENSMUSG00000062867
Plekhb2	0.0191037	0.0376934	0.061	0.022	1	ENSMUSG00000026123
Rnf166	0.0191082	0.0520196	0.148	0.086	1	ENSMUSG00000014470
Tm4sf1	0.0191415	0.0778688	0.518	0.364	1	ENSMUSG00000027800
Tmco3	0.0191652	0.0379081	0.104	0.052	1	ENSMUSG00000038497
Rpl21	0.0191813	-0.106709	0.835	0.799	1	ENSMUSG00000041453
Akap12	0.019306	0.0653786	0.587	0.413	1	ENSMUSG00000038587
Tssc4	0.019374	0.043031	0.144	0.082	1	ENSMUSG00000045752
Pogk	0.0194115	0.040823	0.169	0.1	1	ENSMUSG00000040596
Uck2	0.0194585	0.0498413	0.119	0.063	1	ENSMUSG00000026558
Gm4285	0.0194624	0.0375812	0.035	0.007	1	ENSMUSG00000085829
Gde1	0.0195815	0.0394994	0.154	0.089	1	ENSMUSG00000033917
Klf10	0.019628	0.0401498	0.175	0.104	1	ENSMUSG00000037465
Rprd1a	0.0197743	0.0313814	0.136	0.074	1	ENSMUSG00000040446
Cd151	0.0197748	0.0502463	0.451	0.312	1	ENSMUSG00000025510
Amotl2	0.019842	0.0677475	0.489	0.346	1	ENSMUSG00000032531
Gm23472	0.0198691	-0.0266719	0.019	0.048	1	ENSMUSG00000094050
Gm24497	0.0198691	-0.0266719	0.019	0.048	1	ENSMUSG00000093956
U2af1l4.1	0.0198984	0.0315476	0.173	0.104	1	NA
Mpdz	0.0199541	0.0652209	0.376	0.264	1	ENSMUSG00000028402
Ggcx	0.0199599	0.05212	0.188	0.115	1	ENSMUSG00000053460
Sar1b	0.0199826	0.0576352	0.236	0.152	1	ENSMUSG00000020386
Akap1	0.0200221	0.0466256	0.129	0.071	1	ENSMUSG00000018428
Dclk2	0.0200247	0.0237267	0.067	0.026	1	ENSMUSG00000028078
Brk1	0.0200283	0.0473519	0.482	0.331	1	ENSMUSG00000033940
Api5	0.0200363	0.0455041	0.367	0.242	1	ENSMUSG00000027193
Cnih1	0.0200397	0.0580455	0.33	0.227	1	ENSMUSG00000015759
Atf5	0.0201838	0.0467084	0.269	0.175	1	ENSMUSG00000038539
Dmwd	0.0202369	0.0547792	0.207	0.13	1	ENSMUSG00000030410
Kansl2	0.0202976	0.0387293	0.313	0.208	1	ENSMUSG00000022992
Gm10357	0.0203114	-0.01439	0.004	0.022	1	ENSMUSG00000072421
Dctn3	0.0203331	0.0513019	0.148	0.086	1	ENSMUSG00000028447
Cpd	0.0203938	0.0386595	0.278	0.182	1	ENSMUSG00000020841
Dync1li2	0.0204178	0.0499271	0.276	0.182	1	ENSMUSG00000035770
AC151982.1	0.0204185	-0.0134196	0.004	0.022	1	ENSMUSG00000113706
Ccdc93	0.0204207	0.047883	0.098	0.048	1	ENSMUSG00000026339
Gm21949	0.0205097	0.0212095	0.042	0.011	1	ENSMUSG00000102422
Rpl26	0.0205242	-0.0789877	0.848	0.788	1	ENSMUSG00000060938
Gm7832	0.0205262	-0.0236207	0.004	0.022	1	ENSMUSG00000106917
Aspn	0.0205262	-0.0699166	0.004	0.022	1	ENSMUSG00000021388
Zfp369	0.0205514	0.0418357	0.071	0.03	1	ENSMUSG00000021514
Arhgap31	0.0205578	0.0542954	0.221	0.141	1	ENSMUSG00000022799
Lhx2	0.0205663	0.0236052	0.035	0.007	1	ENSMUSG00000000247
Dusp18	0.0205663	0.0181514	0.035	0.007	1	ENSMUSG00000047205
Grin3a	0.0206344	-0.0385625	0.004	0.022	1	ENSMUSG00000039579
CT009546.1	0.0206344	-0.0218279	0.004	0.022	1	ENSMUSG00000113258
Serpina3c	0.0206364	0.051694	0.173	0.104	1	ENSMUSG00000066361
Ufsp2	0.02064	0.05242	0.223	0.141	1	ENSMUSG00000031634
Mad1l1	0.0206846	0.0598711	0.142	0.082	1	ENSMUSG00000029554
Ap5s1	0.0207052	0.0388577	0.048	0.015	1	ENSMUSG00000068264
Tuba4a	0.0207357	-0.01712	0	0.011	1	ENSMUSG00000026202
A130050O07Rik	0.0207357	-0.0207969	0	0.011	1	ENSMUSG00000102277
Gfi1b	0.0207357	-0.0271188	0	0.011	1	ENSMUSG00000026815
Gm10356	0.0207357	-0.0150801	0	0.011	1	ENSMUSG00000072387
Gm8325	0.0207357	-0.00724424	0	0.011	1	ENSMUSG00000027694
Gm43362	0.0207357	-0.0194587	0	0.011	1	ENSMUSG00000105201
Cntfr	0.0207357	-0.0222846	0	0.011	1	ENSMUSG00000028444
Zswim5	0.0207357	-0.0205078	0	0.011	1	ENSMUSG00000033948
Ermap	0.0207357	-0.0230752	0	0.011	1	ENSMUSG00000028644
Gm13007	0.0207357	-0.0102725	0	0.011	1	ENSMUSG00000083852
Gm15719	0.0207357	-0.0172389	0	0.011	1	ENSMUSG00000081242
Adamts3	0.0207357	-0.0151746	0	0.011	1	ENSMUSG00000043635
Snca	0.0207357	-0.0204239	0	0.011	1	ENSMUSG00000025889
Gm7507	0.0207357	-0.0013348	0	0.011	1	ENSMUSG00000098142
Alms1-ps2	0.0207357	-0.0115103	0	0.011	1	ENSMUSG00000090098
Gm8203	0.0207357	-0.0102725	0	0.011	1	ENSMUSG00000101878
Dnaaf3	0.0207357	-0.0209583	0	0.011	1	ENSMUSG00000055809
Proser3	0.0207357	-0.0188985	0	0.011	1	ENSMUSG00000036864
Vstm2b	0.0207357	-0.0155239	0	0.011	1	ENSMUSG00000039257
Palb2	0.0207357	-0.0124437	0	0.011	1	ENSMUSG00000044702
Ces2g	0.0207357	-0.0201233	0	0.011	1	ENSMUSG00000031877
AI593442	0.0207357	-0.0212045	0	0.011	1	ENSMUSG00000078307
AC155941.4	0.0207357	-0.00625287	0	0.011	1	ENSMUSG00000112731
Gm11675	0.0207357	-0.0113563	0	0.011	1	ENSMUSG00000082272
Gm17541	0.0207357	-0.017311	0	0.011	1	ENSMUSG00000091732
AC152827.2	0.0207357	-0.0224641	0	0.011	1	ENSMUSG00000113662
CT573034.2	0.0207357	-0.00583177	0	0.011	1	ENSMUSG00000113151
Ccnb1	0.0207357	-0.0223483	0	0.011	1	ENSMUSG00000041431
Gm8444	0.0207357	-0.0134143	0	0.011	1	ENSMUSG00000069439
52715	0.0207357	-0.0298517	0	0.011	1	NA
Ppp1r2-ps6	0.0207357	-0.00884272	0	0.011	1	ENSMUSG00000095869
Ppp1r2-ps1	0.0207357	-0.00884272	0	0.011	1	ENSMUSG00000094843
52549	0.0207357	-0.00826344	0	0.011	1	NA
Slc14a1	0.0207357	-0.0251494	0	0.011	1	ENSMUSG00000059336
Syp	0.0207357	-0.0201718	0	0.011	1	ENSMUSG00000031144
Lix1	0.020743	-0.0257916	0.004	0.022	1	ENSMUSG00000047786
Gstt3	0.0208198	0.0634665	0.117	0.063	1	ENSMUSG00000001665
Fbxo6	0.0208331	0.0304973	0.042	0.011	1	ENSMUSG00000055401
Psmd3	0.0208762	0.0437937	0.209	0.13	1	ENSMUSG00000017221
Gas6	0.02092	-0.110699	0.791	0.725	1	ENSMUSG00000031451
Gm27477	0.0209637	0.0393892	0.042	0.011	1	ENSMUSG00000098749
Gpr135	0.0210677	0.0247901	0.048	0.015	1	ENSMUSG00000043398
Ercc6	0.021072	-0.0286741	0.004	0.022	1	ENSMUSG00000054051
Tbc1d22a	0.02108	0.0446154	0.098	0.048	1	ENSMUSG00000051864
Fzd4	0.0210888	0.0533273	0.092	0.045	1	ENSMUSG00000049791
Map3k10	0.0211106	0.0408978	0.119	0.063	1	ENSMUSG00000040390
Gpbp1	0.0211271	-0.167546	0.219	0.268	1	ENSMUSG00000032745
Fam53c	0.0211431	0.0334094	0.251	0.16	1	ENSMUSG00000034300
Nomo1	0.0211617	0.04987	0.167	0.1	1	ENSMUSG00000030835
Tex261	0.0211851	0.0796884	0.58	0.413	1	ENSMUSG00000014748
Tctex1d2	0.0211853	0.0299507	0.054	0.019	1	ENSMUSG00000014075
Fkbp9	0.021203	0.0620262	0.593	0.413	1	ENSMUSG00000029781
Tmem109	0.021244	0.0472229	0.223	0.145	1	ENSMUSG00000034659
Psma3	0.0212819	0.0378546	0.52	0.379	1	ENSMUSG00000060073
Bloc1s1	0.0213232	0.0380889	0.347	0.234	1	ENSMUSG00000090247
Fam214b	0.0213297	0.0445801	0.123	0.067	1	ENSMUSG00000036002
Hpcal1	0.0213308	0.0660704	0.255	0.167	1	ENSMUSG00000071379
Ndufb5	0.0213343	0.0579502	0.403	0.283	1	ENSMUSG00000027673
Irf1	0.0213964	0.0553645	0.344	0.238	1	ENSMUSG00000018899
Atxn2l	0.0215136	0.0341576	0.334	0.219	1	ENSMUSG00000032637
Utrn	0.0215342	-0.171514	0.196	0.242	1	ENSMUSG00000019820
C330007P06Rik	0.0216531	0.0496821	0.167	0.1	1	ENSMUSG00000006423
Naa50	0.0216711	-0.147535	0.232	0.283	1	ENSMUSG00000022698
Cycs	0.0216746	0.0133038	0.349	0.238	1	ENSMUSG00000063694
Sfrp4	0.0217227	0.0829411	0.326	0.23	1	ENSMUSG00000021319
Whrn	0.0217503	-0.0681257	0.017	0.045	1	ENSMUSG00000039137
Acaa1b	0.0217596	0.0322797	0.086	0.041	1	ENSMUSG00000010651
Rhoa	0.02176	-0.059916	0.781	0.706	1	ENSMUSG00000007815
Slc25a17	0.0217819	0.0664412	0.386	0.264	1	ENSMUSG00000022404
Aspscr1	0.0218176	0.0413165	0.065	0.026	1	ENSMUSG00000025142
H2-T22	0.0218264	0.0475622	0.351	0.242	1	ENSMUSG00000056116
Mrpl58	0.0218334	0.0349965	0.092	0.045	1	ENSMUSG00000018858
Rps18-ps3	0.0218733	-0.104333	0.209	0.264	1	ENSMUSG00000057657
Snrpb2	0.0218846	0.0641303	0.428	0.297	1	ENSMUSG00000008333
Sptssa	0.0218936	-0.17359	0.282	0.32	1	ENSMUSG00000044408
Prdm4	0.0219662	0.0263323	0.042	0.011	1	ENSMUSG00000035529
Tgfb3	0.0219704	0.0555058	0.315	0.212	1	ENSMUSG00000021253
Paqr7	0.0220178	0.047984	0.123	0.067	1	ENSMUSG00000037348
Nagpa	0.0220225	0.0367876	0.129	0.071	1	ENSMUSG00000023143
Chmp3	0.0220355	0.0691727	0.457	0.323	1	ENSMUSG00000053119
Mphosph6	0.0220388	0.0541596	0.121	0.067	1	ENSMUSG00000031843
Mtfr1l	0.0220628	0.0555669	0.409	0.283	1	ENSMUSG00000046671
Zbtb11os1	0.022103	0.0256553	0.042	0.011	1	ENSMUSG00000102101
Abcd1	0.0221318	0.0250169	0.121	0.063	1	ENSMUSG00000031378
Llph-ps2	0.022141	0.0151637	0.109	0.056	1	ENSMUSG00000083364
Gm43321	0.0221447	0.0333177	0.09	0.045	1	ENSMUSG00000106408
Frrs1	0.0221879	0.0526446	0.106	0.056	1	ENSMUSG00000033386
Iigp1	0.0222009	0.039693	0.253	0.164	1	ENSMUSG00000054072
Rmnd5b	0.0224258	0.0500006	0.167	0.1	1	ENSMUSG00000001054
Amer1	0.0224637	0.0479774	0.092	0.045	1	ENSMUSG00000050332
4932438A13Rik	0.0225103	-0.122225	0.121	0.175	1	ENSMUSG00000037270
Efemp2	0.0225119	0.0614671	0.497	0.357	1	ENSMUSG00000024909
Vps53	0.0225223	0.0291527	0.14	0.078	1	ENSMUSG00000017288
Nsmce1	0.022644	-0.0827786	0.046	0.086	1	ENSMUSG00000030750
Tatdn1	0.02274	0.043098	0.065	0.026	1	ENSMUSG00000050891
Cd1d1	0.0227922	0.0363869	0.376	0.253	1	ENSMUSG00000028076
Agrn	0.0227994	0.0314322	0.196	0.123	1	ENSMUSG00000041936
Bcat1	0.0228095	0.0616264	0.111	0.059	1	ENSMUSG00000030268
Abhd14a	0.0228246	0.0478963	0.127	0.071	1	ENSMUSG00000042210
Plod3	0.0228909	0.0387397	0.296	0.197	1	ENSMUSG00000004846
Ncdn	0.0228913	0.0679106	0.2	0.13	1	ENSMUSG00000028833
Ift74	0.0228922	0.0271215	0.169	0.1	1	ENSMUSG00000028576
Ndufb10	0.0229935	0.0464949	0.301	0.201	1	ENSMUSG00000040048
Hist1h2ae	0.0230399	-0.0146305	0.015	0.041	1	ENSMUSG00000069272
Hist1h2ab	0.0230399	-0.0122847	0.015	0.041	1	ENSMUSG00000061615
C920006O11Rik	0.0230425	0.0320405	0.027	0.004	1	ENSMUSG00000097574
Dnajc28	0.0230597	-0.0430291	0.006	0.026	1	ENSMUSG00000039763
AI662270	0.0231201	-0.0533007	0.015	0.041	1	ENSMUSG00000087107
Nudt5	0.0231696	0.0535748	0.125	0.071	1	ENSMUSG00000025817
H2-Eb1	0.0232243	0.0257711	0.027	0.004	1	ENSMUSG00000060586
Zfp72	0.0232745	-0.0399264	0.006	0.026	1	ENSMUSG00000069184
Acsl3	0.023305	0.0348213	0.071	0.03	1	ENSMUSG00000032883
Pnkd	0.0233605	0.0334949	0.175	0.104	1	ENSMUSG00000026179
Serpinb6a	0.0233731	0.0624036	0.491	0.346	1	ENSMUSG00000060147
Dfna5	0.0233825	-0.0360079	0.006	0.026	1	ENSMUSG00000029821
Il12rb1	0.0234073	0.035037	0.027	0.004	1	ENSMUSG00000000791
Gm12216	0.0234073	0.0310403	0.027	0.004	1	ENSMUSG00000081769
H2afy2	0.0234121	0.0405039	0.157	0.093	1	ENSMUSG00000020086
Axin1	0.0234268	0.0589842	0.14	0.082	1	ENSMUSG00000024182
Adam19	0.0234372	0.0282528	0.15	0.086	1	ENSMUSG00000011256
Akt1s1	0.0234611	0.0371459	0.127	0.071	1	ENSMUSG00000011096
Zfand2b	0.0234998	0.051729	0.058	0.022	1	ENSMUSG00000026197
Gm10029	0.0235248	-0.0288134	0.015	0.041	1	ENSMUSG00000068324
Mfap3	0.0235322	0.0175927	0.303	0.193	1	ENSMUSG00000020522
Slc31a1	0.0235385	0.0444094	0.269	0.175	1	ENSMUSG00000066150
Cpt1a	0.0235806	0.0478639	0.294	0.197	1	ENSMUSG00000024900
Akr1b10	0.023598	0.0734547	0.123	0.071	1	ENSMUSG00000061758
Gm4535	0.0235999	-0.0224741	0.006	0.026	1	ENSMUSG00000091083
Smarca2	0.0236108	-0.110941	0.633	0.576	1	ENSMUSG00000024921
Crtap	0.0236145	-0.0818225	0.787	0.721	1	ENSMUSG00000032431
Abhd15	0.0236199	0.0341209	0.058	0.022	1	ENSMUSG00000000686
Tmem138	0.0236262	0.0387336	0.138	0.078	1	ENSMUSG00000024666
Casc4	0.0236587	0.0496666	0.238	0.156	1	ENSMUSG00000060227
Cc2d1a	0.0236842	0.0280774	0.027	0.004	1	ENSMUSG00000036686
Rom1	0.0237052	0.0239675	0.081	0.037	1	ENSMUSG00000071648
Vmn2r97	0.0237771	0.0333302	0.027	0.004	1	ENSMUSG00000091491
Mrps18c	0.0237816	0.0467842	0.238	0.156	1	ENSMUSG00000016833
Ncam1	0.023817	-0.122395	0.71	0.647	1	ENSMUSG00000039542
Stat3	0.0238602	-0.132888	0.574	0.55	1	ENSMUSG00000004040
Dnmt3b	0.0238635	0.024932	0.019	0	1	ENSMUSG00000027478
Actr5	0.0238635	0.0197176	0.019	0	1	ENSMUSG00000037761
Cds1	0.0238635	0.0255608	0.019	0	1	ENSMUSG00000029330
Zfp853	0.0238635	0.0222817	0.019	0	1	ENSMUSG00000093910
Dgat2	0.0238635	0.0237569	0.019	0	1	ENSMUSG00000030747
2610027K06Rik	0.0238635	0.0244667	0.019	0	1	ENSMUSG00000087013
Vipr2	0.0238635	0.0191024	0.019	0	1	ENSMUSG00000011171
Tmem191c	0.0238635	0.0230975	0.019	0	1	ENSMUSG00000055692
Gm16196	0.0238635	0.0269669	0.019	0	1	ENSMUSG00000086154
H2-Q5	0.0238635	0.024919	0.019	0	1	ENSMUSG00000055413
Plekhg4	0.0238635	0.0232279	0.019	0	1	ENSMUSG00000014782
BC052040	0.0238704	0.0291072	0.027	0.004	1	ENSMUSG00000040282
Lix1l	0.0238915	0.0664376	0.505	0.361	1	ENSMUSG00000049288
BC017643	0.0239141	0.0431584	0.117	0.063	1	ENSMUSG00000039294
Gm6822	0.0239458	0.013701	0.075	0.033	1	ENSMUSG00000061863
Ica1l	0.0239518	-0.0567476	0.008	0.03	1	ENSMUSG00000026018
Ccdc114	0.0239639	0.0256531	0.027	0.004	1	ENSMUSG00000040189
Armcx3	0.023985	-0.152664	0.232	0.279	1	ENSMUSG00000049047
Tmem165	0.024036	0.0227663	0.453	0.301	1	ENSMUSG00000029234
Gm13413	0.0240399	-0.00926941	0.006	0.026	1	ENSMUSG00000083004
Matn4	0.0240578	0.0221747	0.027	0.004	1	ENSMUSG00000016995
Slc8a3	0.0240752	-0.100989	0.058	0.1	1	ENSMUSG00000079055
AC123920.1	0.0241546	-0.0409643	0.008	0.03	1	ENSMUSG00000113980
Uqcr10	0.0241857	0.0471972	0.334	0.227	1	ENSMUSG00000059534
Kif7	0.0242163	0.0163461	0.065	0.026	1	ENSMUSG00000050382
Foxf2	0.0242163	0.0300191	0.065	0.026	1	ENSMUSG00000038402
Ppp2r3d	0.0242699	0.0244248	0.081	0.037	1	ENSMUSG00000093803
Ndufaf3	0.0243306	0.0477512	0.069	0.03	1	ENSMUSG00000070283
Gm42785	0.0243527	-0.018413	0.015	0.041	1	ENSMUSG00000106948
Arhgef11	0.0243776	0.0450407	0.326	0.219	1	ENSMUSG00000041977
Cxcl14	0.0243959	0.140045	0.687	0.528	1	ENSMUSG00000021508
Desi1	0.0244557	0.0461167	0.052	0.019	1	ENSMUSG00000022472
Mrpl10	0.0244587	0.0385894	0.169	0.1	1	ENSMUSG00000001445
Tada1	0.0244633	0.0176308	0.15	0.086	1	ENSMUSG00000026563
Mrpl15	0.0244704	0.0389448	0.207	0.13	1	ENSMUSG00000033845
Dcbld2	0.0245302	0.0372287	0.203	0.123	1	ENSMUSG00000035107
Naa10	0.0245304	0.0206244	0.081	0.037	1	ENSMUSG00000031388
Prosc	0.0245665	0.054528	0.125	0.071	1	ENSMUSG00000031485
Gm6286	0.024623	-0.0640232	0.18	0.234	1	ENSMUSG00000086925
Gm44870	0.0246682	-0.015514	0.008	0.03	1	ENSMUSG00000109484
AC153522.1	0.0246682	-0.0374615	0.008	0.03	1	ENSMUSG00000112013
Sord	0.0247524	0.0391499	0.246	0.16	1	ENSMUSG00000027227
Disp1	0.0247869	0.0437378	0.052	0.019	1	ENSMUSG00000030768
Ddx51	0.0247879	0.0351454	0.058	0.022	1	ENSMUSG00000029504
Zfp341	0.0248271	-0.0223917	0.006	0.026	1	ENSMUSG00000059842
Fbxo31	0.025038	0.0515854	0.1	0.052	1	ENSMUSG00000052934
Slc35b2	0.0250965	0.0297032	0.123	0.067	1	ENSMUSG00000037089
Anxa3	0.025111	0.0439633	0.163	0.097	1	ENSMUSG00000029484
Pvr	0.0251654	0.0253621	0.065	0.026	1	ENSMUSG00000040511
Ensa	0.0252271	0.0348304	0.386	0.257	1	ENSMUSG00000038619
Zrsr1	0.0252716	0.0485613	0.198	0.123	1	ENSMUSG00000044068
Gas2l1	0.0252845	0.0135231	0.129	0.071	1	ENSMUSG00000034201
Cald1	0.0253054	-0.0386142	0.944	0.903	1	ENSMUSG00000029761
Phykpl	0.0253078	0.0488895	0.069	0.03	1	ENSMUSG00000020359
Etv1	0.025313	0.0365725	0.117	0.063	1	ENSMUSG00000004151
Pus7l	0.025325	0.036278	0.052	0.019	1	ENSMUSG00000033356
Gm5526	0.0253387	-0.0381912	0.027	0.059	1	ENSMUSG00000084817
Bak1	0.0253945	0.0276846	0.255	0.164	1	ENSMUSG00000057789
Xpnpep3	0.0254247	0.0535987	0.09	0.045	1	ENSMUSG00000022401
Braf	0.0254582	0.056531	0.225	0.145	1	ENSMUSG00000002413
Nab1	0.0254991	0.0504374	0.18	0.112	1	ENSMUSG00000002881
Serinc1	0.0255854	-0.128201	0.532	0.506	1	ENSMUSG00000019877
Rps24-ps3	0.0256664	0.0388192	0.052	0.019	1	ENSMUSG00000081049
2810403D21Rik	0.0256858	0.0316267	0.033	0.007	1	ENSMUSG00000086629
Lin9	0.0257238	-0.0389202	0.008	0.03	1	ENSMUSG00000058729
Sbk1	0.0257637	0.0416487	0.1	0.052	1	ENSMUSG00000042978
Rrbp1	0.0258139	-0.0675309	0.818	0.703	1	ENSMUSG00000027422
Prr16	0.0258565	0.0531028	0.15	0.089	1	ENSMUSG00000073565
Zfp408	0.0259402	0.0266198	0.058	0.022	1	ENSMUSG00000075040
Fbxw11	0.0259762	0.0266279	0.129	0.071	1	ENSMUSG00000020271
Rpl14	0.026012	-0.120544	0.735	0.677	1	ENSMUSG00000025794
Gm13532	0.0260399	0.0238313	0.033	0.007	1	ENSMUSG00000081642
Becn1	0.0260482	0.0424805	0.2	0.126	1	ENSMUSG00000035086
Zdhhc6	0.0260647	0.0271416	0.259	0.167	1	ENSMUSG00000024982
Stxbp5	0.0260664	0.0378539	0.046	0.015	1	ENSMUSG00000019790
Dusp28	0.0260809	0.0219234	0.119	0.063	1	ENSMUSG00000047067
Rpn1	0.0261338	0.0734731	0.543	0.387	1	ENSMUSG00000030062
Zfp516	0.0261501	0.0135603	0.184	0.112	1	ENSMUSG00000058881
Isyna1	0.0261632	0.0504164	0.154	0.093	1	ENSMUSG00000019139
Tpcn2	0.0262159	0.0380234	0.046	0.015	1	ENSMUSG00000048677
Impa1	0.0262669	0.0455212	0.271	0.178	1	ENSMUSG00000027531
Selenok	0.0262806	0.0615126	0.585	0.405	1	ENSMUSG00000042682
Rnf157	0.0263082	0.0330743	0.033	0.007	1	ENSMUSG00000052949
Fam177a	0.0263515	0.0247346	0.269	0.178	1	ENSMUSG00000095595
Gstm5	0.0263859	0.0362054	0.173	0.104	1	ENSMUSG00000004032
Tesk1	0.0264131	0.0326059	0.142	0.082	1	ENSMUSG00000028458
Mettl1	0.026486	0.0465482	0.111	0.059	1	ENSMUSG00000006732
Txlng	0.0265727	0.0301878	0.052	0.019	1	ENSMUSG00000038344
Tmem230	0.0266258	0.0364629	0.086	0.041	1	ENSMUSG00000027341
Mrgpre	0.0266594	0.0548488	0.223	0.145	1	ENSMUSG00000048965
Yif1b	0.026714	0.0433364	0.152	0.089	1	ENSMUSG00000030588
Tctn2	0.0267449	0.033959	0.046	0.015	1	ENSMUSG00000029386
Exosc5	0.0267453	0.010082	0.098	0.048	1	ENSMUSG00000061286
Nop10	0.0267509	0.0381128	0.384	0.264	1	ENSMUSG00000027133
Zbtb45	0.026757	0.041188	0.121	0.067	1	ENSMUSG00000049600
Poc1b	0.026815	0.0384317	0.154	0.093	1	ENSMUSG00000019952
Ccdc25	0.0268319	0.0580981	0.225	0.149	1	ENSMUSG00000022035
Slc10a3	0.026833	0.0389834	0.161	0.097	1	ENSMUSG00000032806
Extl2	0.0268485	0.0313461	0.24	0.152	1	ENSMUSG00000027963
Fam229b	0.0268521	0.030237	0.033	0.007	1	ENSMUSG00000051736
Hdgfl2	0.0268693	-0.07213	0.035	0.071	1	ENSMUSG00000002833
Tjp2	0.0270355	0.0305041	0.033	0.007	1	ENSMUSG00000024812
2005-09-01	0.0270909	0.0102732	0.284	0.186	1	ENSMUSG00000072214
Il2rg	0.027143	0.0439475	0.079	0.037	1	ENSMUSG00000031304
Med25	0.0271603	0.0421293	0.163	0.097	1	ENSMUSG00000002968
Fundc2	0.0271664	0.0657109	0.585	0.409	1	ENSMUSG00000031198
Smyd2	0.0271785	0.0328859	0.167	0.1	1	ENSMUSG00000026603
Rasl11b	0.0272163	0.0265257	0.052	0.019	1	ENSMUSG00000049907
F13a1	0.02722	0.0269267	0.033	0.007	1	ENSMUSG00000039109
Guf1	0.0272329	0.0238384	0.086	0.041	1	ENSMUSG00000029208
Prep	0.0272446	0.0256267	0.127	0.071	1	ENSMUSG00000019849
Bdp1	0.0272917	-0.123253	0.123	0.175	1	ENSMUSG00000049658
Pip5k1c	0.0273553	0.0350059	0.207	0.13	1	ENSMUSG00000034902
Steap3	0.0274894	0.0460285	0.09	0.045	1	ENSMUSG00000026389
Rab20	0.0275796	0.0318791	0.052	0.019	1	ENSMUSG00000031504
Ripk3	0.0275796	0.0289707	0.052	0.019	1	ENSMUSG00000022221
Actr3b	0.027595	0.0326279	0.046	0.015	1	ENSMUSG00000056367
Dmap1	0.0276434	0.0367263	0.04	0.011	1	ENSMUSG00000009640
Zfp276	0.0276434	0.0348876	0.04	0.011	1	ENSMUSG00000001065
Ift43	0.0276462	0.0120165	0.23	0.145	1	ENSMUSG00000007867
Stn1	0.0276527	0.0297632	0.052	0.019	1	ENSMUSG00000042694
Insc	0.0277058	-0.126841	0.069	0.112	1	ENSMUSG00000048782
Tfpi	0.0277358	0.0591416	0.142	0.086	1	ENSMUSG00000027082
AI464131	0.027752	0.0346252	0.046	0.015	1	ENSMUSG00000046312
AC129085.1	0.0277702	0.0444771	0.19	0.126	1	ENSMUSG00000114458
Atp9b	0.0277786	0.0362477	0.161	0.097	1	ENSMUSG00000024566
Tmem254a	0.0277904	0.0383705	0.307	0.216	1	ENSMUSG00000072676
Wdr92	0.0278055	-0.0843389	0.042	0.078	1	ENSMUSG00000078970
Csmd1	0.0278209	0.0596255	0.144	0.086	1	ENSMUSG00000060924
Abcc1	0.0278406	0.0466044	0.115	0.063	1	ENSMUSG00000023088
Mrpl23-ps1	0.0278904	0.0401672	0.305	0.212	1	ENSMUSG00000075279
Stard3nl	0.0279183	0.0525394	0.376	0.264	1	ENSMUSG00000003062
Zfp768	0.0279837	0.0444242	0.084	0.041	1	ENSMUSG00000047371
Ncor2	0.028043	0.0451274	0.299	0.208	1	ENSMUSG00000029478
Taf5l	0.0280539	0.0239726	0.111	0.059	1	ENSMUSG00000038697
Gapdh	0.028058	0.0563968	0.877	0.766	1	ENSMUSG00000057666
Imp3	0.0281432	0.0360537	0.432	0.294	1	ENSMUSG00000032288
Pxylp1	0.028144	0.0385592	0.407	0.279	1	ENSMUSG00000043587
Raph1	0.0281607	0.0787771	0.608	0.461	1	ENSMUSG00000026014
Tmem104	0.0281883	0.0350808	0.069	0.03	1	ENSMUSG00000045980
Gm10260	0.028193	-0.0932109	0.198	0.253	1	ENSMUSG00000069117
Vhl	0.0281936	0.0361244	0.253	0.164	1	ENSMUSG00000033933
Tbl3	0.0282442	0.0296867	0.04	0.011	1	ENSMUSG00000040688
Cldn1	0.0282651	0.0534222	0.09	0.045	1	ENSMUSG00000022512
Tnk2	0.0282697	0.0290564	0.121	0.067	1	ENSMUSG00000022791
Wdr73	0.028331	0.0243415	0.04	0.011	1	ENSMUSG00000025722
Scn2a	0.0285052	0.0252059	0.04	0.011	1	ENSMUSG00000075318
Fzd2	0.0285107	0.0289007	0.069	0.03	1	ENSMUSG00000050288
Rbp4	0.0285414	0.0525593	0.104	0.056	1	ENSMUSG00000024990
Cryl1	0.0285487	0.0267451	0.046	0.015	1	ENSMUSG00000021947
Bet1l	0.0285511	0.0345791	0.238	0.156	1	ENSMUSG00000025484
C4a	0.0285934	0.0135071	0.188	0.115	1	ENSMUSG00000015451
Rnasek	0.0286984	-0.127547	0.578	0.543	1	ENSMUSG00000093989
Fhl2	0.0287207	-0.110513	0.695	0.654	1	ENSMUSG00000008136
Gpatch8	0.0287238	0.0189807	0.2	0.123	1	ENSMUSG00000034621
Rpl27	0.0288209	0.0285905	0.718	0.561	1	ENSMUSG00000063316
Ggct	0.0289447	0.0229736	0.04	0.011	1	ENSMUSG00000002797
Foxc1	0.0289817	-0.0437489	0.864	0.762	1	ENSMUSG00000050295
Atp1b3	0.0290194	0.0697726	0.616	0.446	1	ENSMUSG00000032412
Lgi4	0.0290715	0.0458894	0.073	0.033	1	ENSMUSG00000036560
Dnm2	0.0290841	0.0314482	0.219	0.138	1	ENSMUSG00000033335
Ankrd13c	0.0291185	0.0443276	0.144	0.086	1	ENSMUSG00000039988
Cacul1	0.0291291	0.0420407	0.165	0.1	1	ENSMUSG00000033417
Id1	0.0291354	0.0433634	0.129	0.074	1	ENSMUSG00000042745
Vcam1	0.0291405	-0.107956	0.701	0.673	1	ENSMUSG00000027962
Appbp2	0.0293422	0.0521037	0.255	0.171	1	ENSMUSG00000018481
Preb	0.0293507	0.0403537	0.207	0.134	1	ENSMUSG00000045302
Ndufa1	0.0294131	0.0661496	0.641	0.454	1	ENSMUSG00000016427
Creb3l1	0.0294546	-0.178211	0.353	0.383	1	ENSMUSG00000027230
Atp11a	0.0294755	0.0286946	0.23	0.149	1	ENSMUSG00000031441
Nid2	0.0295062	0.0366131	0.1	0.052	1	ENSMUSG00000021806
Gm13623	0.0295161	-0.0385268	0.044	0.082	1	ENSMUSG00000083007
Dbi	0.0295677	0.0933871	0.67	0.509	1	ENSMUSG00000026385
Rnf10	0.0295684	0.0629511	0.491	0.349	1	ENSMUSG00000041740
Rnpepl1	0.0295972	0.0369961	0.125	0.071	1	ENSMUSG00000026269
Pi4k2a	0.0296968	0.0453828	0.084	0.041	1	ENSMUSG00000025178
Trappc12	0.029717	0.0422334	0.144	0.086	1	ENSMUSG00000020628
Tomm5	0.0297983	0.0450429	0.194	0.123	1	ENSMUSG00000078713
Rpl21-ps11	0.0298139	-0.0197785	0.025	0.056	1	ENSMUSG00000105144
Satb1	0.0298139	-0.059796	0.025	0.056	1	ENSMUSG00000023927
Bckdhb	0.0298293	0.0460698	0.056	0.022	1	ENSMUSG00000032263
Entpd4	0.0298455	0.0384688	0.219	0.141	1	ENSMUSG00000095463
Fam149a	0.0298573	0.0366595	0.217	0.138	1	ENSMUSG00000070044
Nfil3	0.0298631	0.050246	0.134	0.078	1	ENSMUSG00000056749
Camk2n1	0.029887	0.0779118	0.649	0.468	1	ENSMUSG00000046447
Gm10132	0.0299326	-0.120075	0.194	0.249	1	ENSMUSG00000063556
Cnn3	0.0299383	0.0814795	0.699	0.52	1	ENSMUSG00000053931
Tuba1b	0.029993	0.0965308	0.689	0.539	1	ENSMUSG00000023004
Msrb1	0.0300643	0.0456619	0.169	0.104	1	ENSMUSG00000075705
Elp2	0.030081	0.0608456	0.236	0.16	1	ENSMUSG00000024271
Mrto4	0.0300959	0.0237941	0.063	0.026	1	ENSMUSG00000028741
Cd55	0.0301425	-0.147259	0.196	0.253	1	ENSMUSG00000026399
Paics	0.0301892	-0.158034	0.447	0.439	1	ENSMUSG00000029247
Ipo9	0.0302321	0.0493455	0.232	0.152	1	ENSMUSG00000041879
Hacl1	0.0302392	0.0211059	0.069	0.03	1	ENSMUSG00000021884
Phlda3	0.0302661	0.0345721	0.19	0.119	1	ENSMUSG00000041801
Rpl38	0.0302844	-0.077401	0.879	0.796	1	ENSMUSG00000057322
Polr1a	0.0303697	0.0372922	0.084	0.041	1	ENSMUSG00000049553
Tmem127	0.0303707	0.0408186	0.267	0.178	1	ENSMUSG00000034850
Psmb4	0.0304071	0.0639105	0.522	0.368	1	ENSMUSG00000005779
Gmppa	0.0305294	0.0421026	0.238	0.16	1	ENSMUSG00000033021
Pbxip1	0.0305552	0.0542302	0.411	0.286	1	ENSMUSG00000042613
Hadhb	0.0305646	0.0297668	0.305	0.204	1	ENSMUSG00000059447
Tmem268	0.0306071	0.0343808	0.129	0.074	1	ENSMUSG00000045917
Atp6v0b	0.0306743	0.035628	0.205	0.13	1	ENSMUSG00000033379
Rngtt	0.0306825	-0.0820939	0.048	0.086	1	ENSMUSG00000028274
Idh3b	0.0307028	0.0347227	0.192	0.123	1	ENSMUSG00000027406
Tmem254b	0.0307752	0.0361858	0.296	0.208	1	ENSMUSG00000021867
Ash1l	0.030786	-0.160059	0.324	0.349	1	ENSMUSG00000028053
Ebp	0.0307873	0.0522378	0.436	0.297	1	ENSMUSG00000031168
Arf5	0.0308587	0.0666859	0.595	0.428	1	ENSMUSG00000020440
Ankmy2	0.0309123	0.0308503	0.119	0.067	1	ENSMUSG00000036188
Nfyc	0.0309876	0.022016	0.219	0.141	1	ENSMUSG00000032897
Rpl30	0.0310038	-0.0704601	0.906	0.848	1	ENSMUSG00000058600
Ccndbp1	0.0310134	0.0415201	0.213	0.138	1	ENSMUSG00000023572
D230025D16Rik	0.0310397	0.0316366	0.104	0.056	1	ENSMUSG00000031889
BC031181	0.0310715	0.0358865	0.269	0.178	1	ENSMUSG00000036299
Zfp275	0.0310919	0.0363891	0.294	0.197	1	ENSMUSG00000031365
Ndufs2	0.0311294	0.0299233	0.422	0.286	1	ENSMUSG00000013593
Lig4	0.0311888	0.0490731	0.098	0.052	1	ENSMUSG00000049717
54300	0.0312285	0.0540106	0.217	0.145	1	NA
1700047I17Rik2	0.0312527	0.021717	0.267	0.178	1	ENSMUSG00000094103
Bmp8a	0.0313099	-0.155688	0.14	0.19	1	ENSMUSG00000032726
Gper1	0.031345	0.029045	0.094	0.048	1	ENSMUSG00000053647
Rnaseh1	0.0313722	0.019623	0.1	0.052	1	ENSMUSG00000020630
Stx1a	0.0313776	0.029231	0.073	0.033	1	ENSMUSG00000007207
Gtf3c1	0.0314054	0.0266659	0.186	0.115	1	ENSMUSG00000032777
Prkaa2	0.0314071	-0.0616702	0.033	0.067	1	ENSMUSG00000028518
Cbx3-ps7	0.0314227	-0.0352279	0.023	0.052	1	ENSMUSG00000059647
Mxd4	0.0314689	-0.0343365	0.933	0.833	1	ENSMUSG00000037235
Tspan18	0.031508	0.0421321	0.123	0.071	1	ENSMUSG00000027217
Adgra3	0.0315158	0.0340708	0.209	0.134	1	ENSMUSG00000029090
Ptpn13	0.0315561	0.041863	0.286	0.19	1	ENSMUSG00000034573
Pdhb	0.031678	0.0332444	0.24	0.16	1	ENSMUSG00000021748
Zmat2	0.0317227	0.0424886	0.37	0.257	1	ENSMUSG00000001383
1500011K16Rik	0.0317713	0.0145947	0.184	0.112	1	ENSMUSG00000051319
Fam126b	0.0318363	0.0376735	0.104	0.056	1	ENSMUSG00000038174
Ttl	0.0318837	0.0330116	0.084	0.041	1	ENSMUSG00000027394
Als2	0.0318896	0.0284779	0.067	0.03	1	ENSMUSG00000026024
Nfx1	0.0319695	0.0347796	0.144	0.086	1	ENSMUSG00000028423
Gm2a	0.0319848	0.0507088	0.428	0.297	1	ENSMUSG00000000594
Phax	0.0320009	0.0478696	0.177	0.112	1	ENSMUSG00000008301
Anxa4	0.0320685	0.0393814	0.251	0.167	1	ENSMUSG00000029994
Scoc	0.0320723	-0.144358	0.236	0.279	1	ENSMUSG00000063253
Ddx58	0.0320908	0.0241852	0.175	0.108	1	ENSMUSG00000040296
Larp7	0.0321154	0.0171916	0.234	0.152	1	ENSMUSG00000027968
Rasl11a	0.032128	0.0429897	0.284	0.193	1	ENSMUSG00000029641
Bcl7b	0.0321425	0.0417609	0.209	0.134	1	ENSMUSG00000029681
Tulp3	0.0322857	0.0279635	0.225	0.145	1	ENSMUSG00000001521
1110059G10Rik	0.0323173	0.0434121	0.23	0.152	1	ENSMUSG00000032551
Mettl14	0.032341	-0.0762404	0.031	0.063	1	ENSMUSG00000028114
Zc3h6	0.0323984	0.043416	0.067	0.03	1	ENSMUSG00000042851
Slc6a9	0.0324412	0.0212702	0.111	0.059	1	ENSMUSG00000028542
Uhrf1bp1	0.0324482	0.0252825	0.025	0.004	1	ENSMUSG00000039512
U2af1	0.0324509	0.0296458	0.344	0.242	1	ENSMUSG00000061613
Timp3	0.0324828	0.0745373	0.564	0.413	1	ENSMUSG00000020044
Olfml2b	0.0324902	-0.0342582	0.979	0.941	1	ENSMUSG00000038463
Dync1i1	0.032499	0.0429561	0.094	0.048	1	ENSMUSG00000029757
Ncl	0.0326732	-0.067518	0.797	0.714	1	ENSMUSG00000026234
Ctbp1	0.0327183	0.0189219	0.388	0.26	1	ENSMUSG00000037373
Cyba	0.0327341	-0.121847	0.109	0.152	1	ENSMUSG00000006519
52739	0.0327388	-0.0690047	0.159	0.208	1	NA
Ppp3cc	0.0327805	-0.0656985	0.042	0.078	1	ENSMUSG00000022092
Polr1c	0.032802	0.0369354	0.211	0.138	1	ENSMUSG00000067148
C5ar2	0.0328287	0.0293927	0.025	0.004	1	ENSMUSG00000074361
Stt3a	0.0328343	0.0427612	0.428	0.297	1	ENSMUSG00000032116
Zfp26	0.032871	0.0347066	0.094	0.048	1	ENSMUSG00000063108
Pgls	0.0329042	0.0199755	0.305	0.201	1	ENSMUSG00000031807
Psmd6	0.0329138	0.0238277	0.186	0.115	1	ENSMUSG00000021737
Gramd4	0.0329302	0.05126	0.121	0.071	1	ENSMUSG00000035900
Nfix	0.0329375	-0.081849	0.752	0.68	1	ENSMUSG00000001911
Epha2	0.0329662	0.024684	0.167	0.1	1	ENSMUSG00000006445
Mapkapk5	0.0329686	0.0141649	0.169	0.104	1	ENSMUSG00000029454
Tnfsf13	0.0329771	0.0151723	0.073	0.033	1	ENSMUSG00000089669
Cdk2ap2	0.0330075	0.045545	0.182	0.115	1	ENSMUSG00000024856
Them6	0.0330845	0.0216743	0.025	0.004	1	ENSMUSG00000056665
Edar	0.0330985	0.0539776	0.092	0.048	1	ENSMUSG00000003227
Ilvbl	0.0331379	0.0175362	0.146	0.086	1	ENSMUSG00000032763
Rnf38	0.0331526	0.0344417	0.203	0.13	1	ENSMUSG00000035696
Ptgfrn	0.0331689	0.0432315	0.248	0.167	1	ENSMUSG00000027864
Baz2b	0.033182	0.039811	0.213	0.138	1	ENSMUSG00000026987
Sigmar1	0.0331943	0.0288879	0.084	0.041	1	ENSMUSG00000036078
Fastkd5	0.0332899	0.0206036	0.017	0	1	ENSMUSG00000079043
Gm9833	0.0332899	0.0163524	0.017	0	1	ENSMUSG00000049230
Amd-ps4	0.0332899	0.00707704	0.017	0	1	ENSMUSG00000019836
Kcnab2	0.0332899	0.0195999	0.017	0	1	ENSMUSG00000028931
Gm10461	0.0332899	0.0208229	0.017	0	1	ENSMUSG00000107277
Lockd	0.0332899	0.0207096	0.017	0	1	ENSMUSG00000098318
Spred3	0.0332899	0.0239779	0.017	0	1	ENSMUSG00000037239
AC133650.1	0.0332899	0.0217156	0.017	0	1	ENSMUSG00000110945
Gm12258	0.0332899	0.0234858	0.017	0	1	ENSMUSG00000072915
Taco1os	0.0332899	0.0194607	0.017	0	1	ENSMUSG00000085255
Pax9	0.0332899	0.0191827	0.017	0	1	ENSMUSG00000001497
Olfr1369-ps1	0.0332899	0.0160298	0.017	0	1	ENSMUSG00000060404
Msln	0.0332899	0.00898308	0.017	0	1	ENSMUSG00000063011
Hmga1	0.0332899	0.0163454	0.017	0	1	ENSMUSG00000046711
54027	0.0332899	0.0193083	0.017	0	1	NA
Ecscr	0.0332899	0.0225459	0.017	0	1	ENSMUSG00000073599
Fam76a	0.0333156	0.0397306	0.207	0.134	1	ENSMUSG00000028878
Tmem208	0.0333632	0.0209084	0.129	0.074	1	ENSMUSG00000014856
Ern1	0.0333927	0.0310643	0.123	0.071	1	ENSMUSG00000020715
H2-Q4	0.0334056	-0.0973089	0.745	0.695	1	ENSMUSG00000035929
Gabarapl2	0.0335578	0.0546807	0.372	0.264	1	ENSMUSG00000031950
Nudc	0.0335784	0.0334807	0.223	0.149	1	ENSMUSG00000028851
Slc35d1	0.0335875	0.0452177	0.061	0.026	1	ENSMUSG00000028521
Nlrx1	0.033592	0.0363173	0.098	0.052	1	ENSMUSG00000032109
Ttyh3	0.0336139	0.0517853	0.265	0.182	1	ENSMUSG00000036565
Sufu	0.033635	0.0332204	0.169	0.104	1	ENSMUSG00000025231
Trpc4ap	0.0337225	0.0380368	0.284	0.193	1	ENSMUSG00000038324
Rab10os	0.0337708	0.0284556	0.056	0.022	1	ENSMUSG00000079179
Sec62	0.0338011	-0.0517214	0.835	0.762	1	ENSMUSG00000027706
Rps17	0.0338257	-0.086859	0.862	0.814	1	ENSMUSG00000061787
Hmox1	0.033902	0.0297982	0.125	0.071	1	ENSMUSG00000005413
Gosr1	0.033915	0.0364796	0.152	0.093	1	ENSMUSG00000010392
Gm7432	0.0339611	-0.0300876	0.092	0.141	1	ENSMUSG00000109610
Hmgb1-ps7	0.0339871	0.0104213	0.05	0.019	1	ENSMUSG00000092281
[truncated: 18,089 more rows]
